# Supplementary material for: The Magnetic Electron Ion Spectrometer: A Review of On-Orbit Sensor Performance, Data, Operations, and Science
Source: PubMed Central journal article supplement (PMC8553741; doi:10.1007/s11214-021-00855-2), 2021-10-28

MagEIS Instrument Mode | Created on: 2021/10/21 | Green = Science | Blue = High-Rate | Red = Maintenance | White = Missing Data

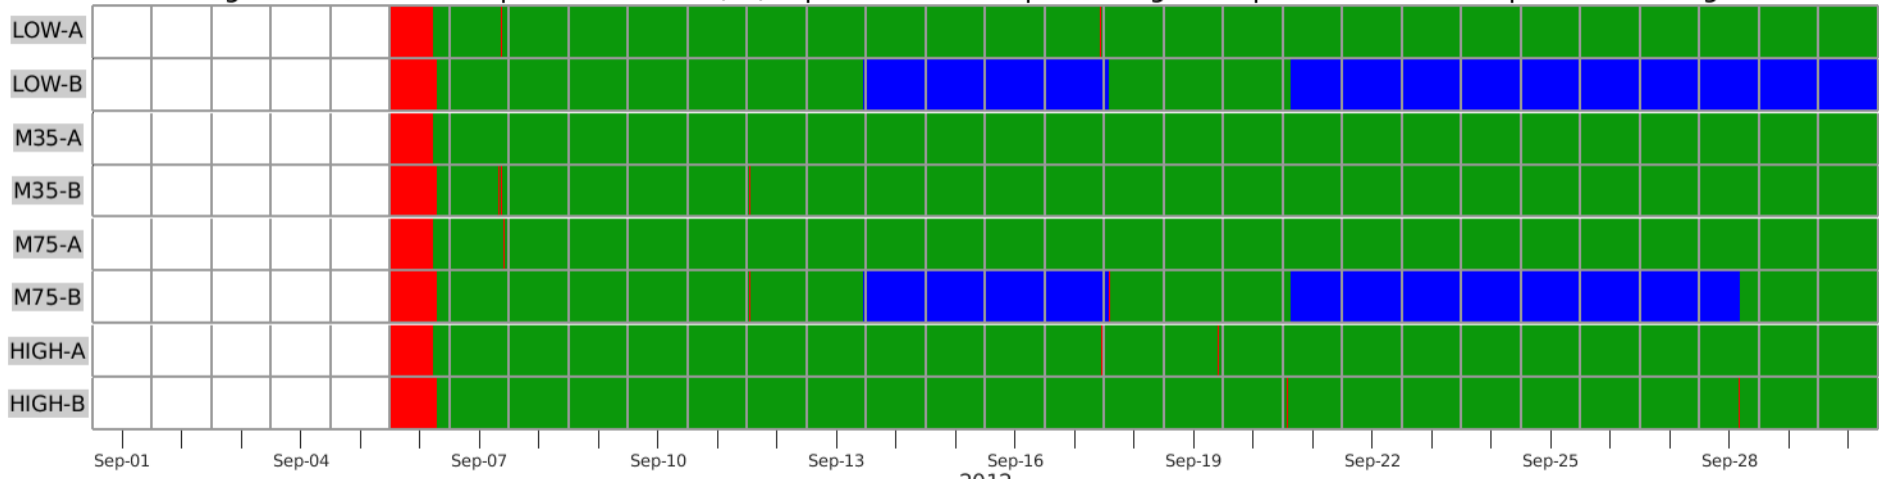

MagEIS Instrument Mode | Created on: 2021/10/21 | Green = Science | Blue = High-Rate | Red = Maintenance | White = Missing Data

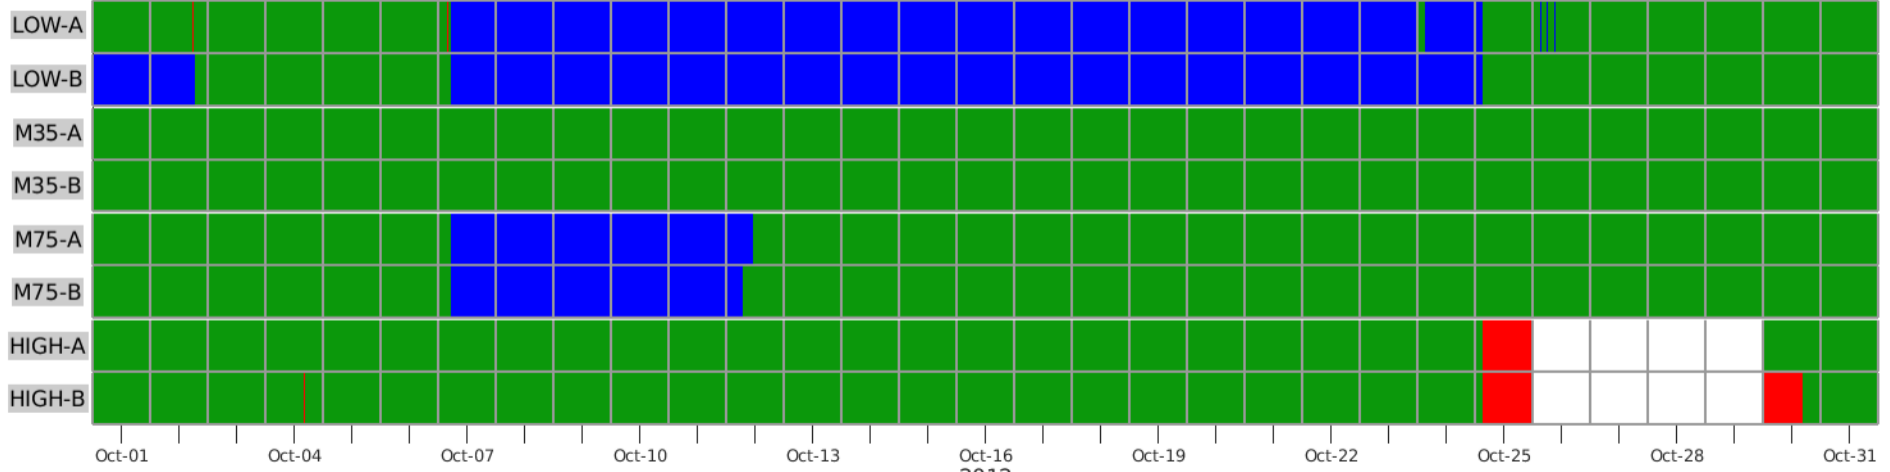



















MagEIS Instrument Mode | Created on: 2021/10/21 | Green = Science | Blue = High-Rate | Red = Maintenance | White = Missing Data

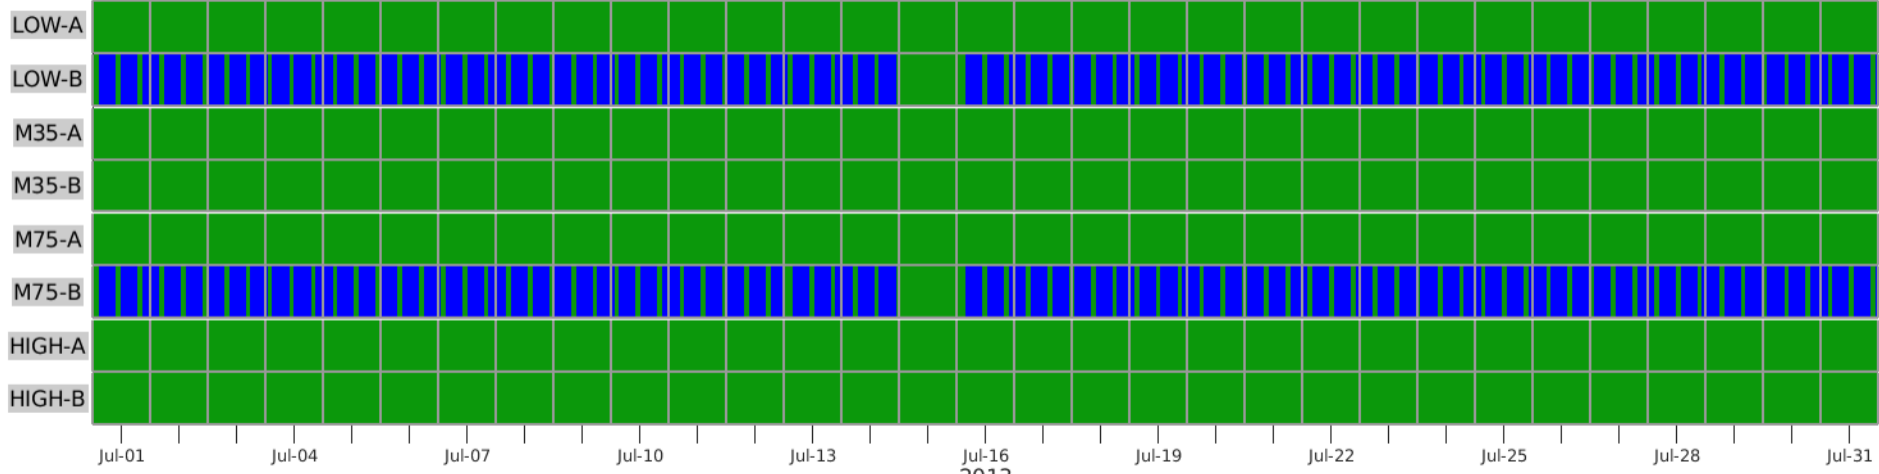



MagEIS Instrument Mode | Created on: 2021/10/21 | Green = Science | Blue = High-Rate | Red = Maintenance | White = Missing Data

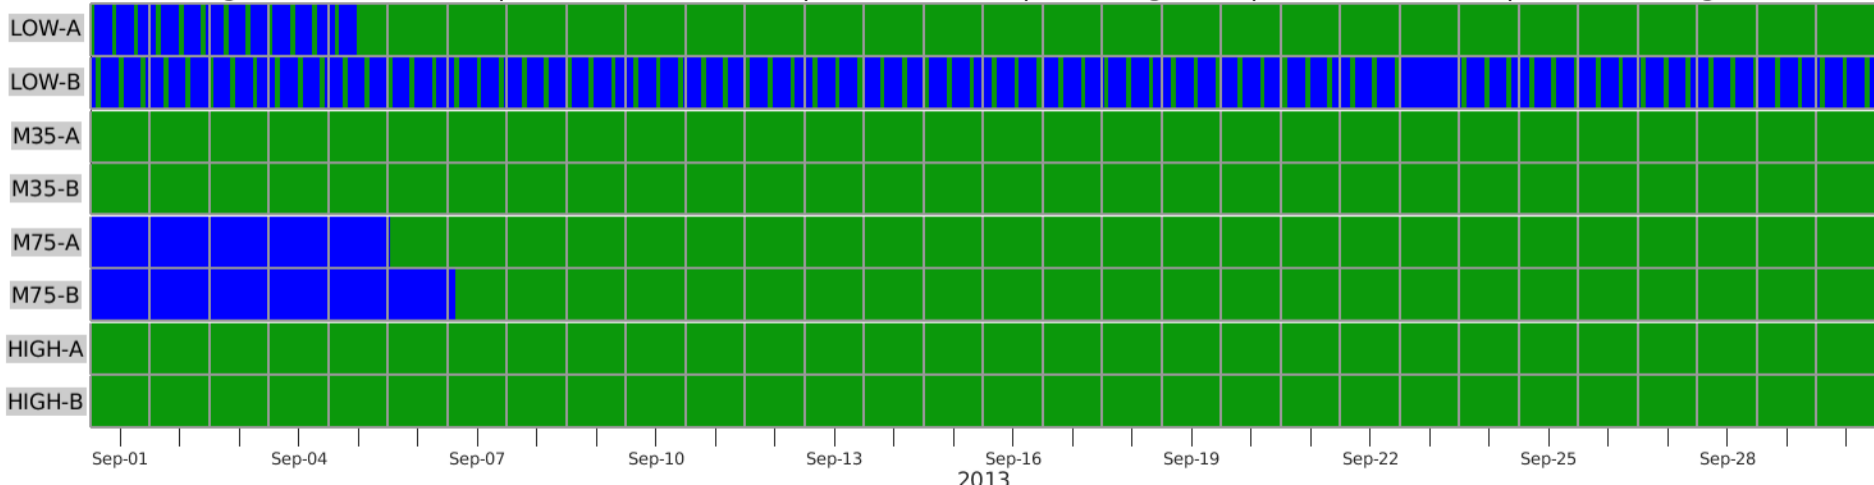

MagEIS Instrument Mode | Created on: 2021/10/21 | Green = Science | Blue = High-Rate | Red = Maintenance | White = Missing Data

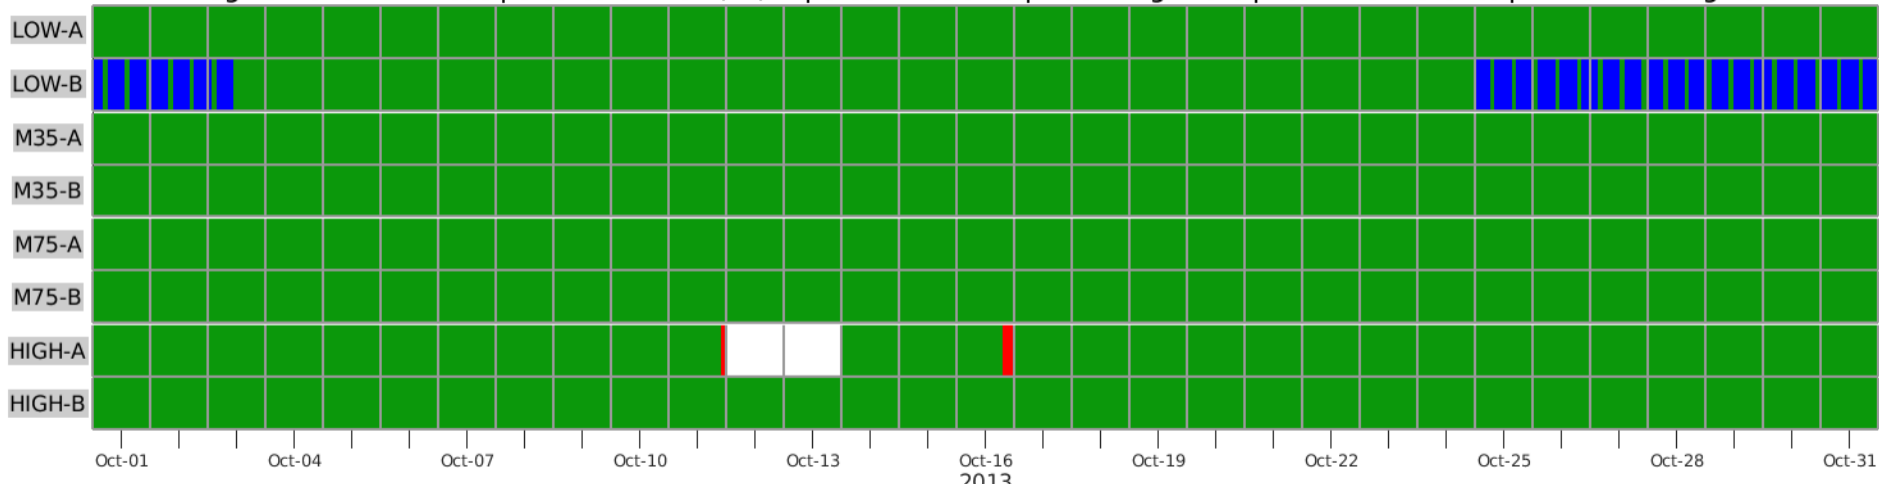









MagEIS Instrument Mode | Created on: 2021/10/21 | Green = Science | Blue = High-Rate | Red = Maintenance | White = Missing Data

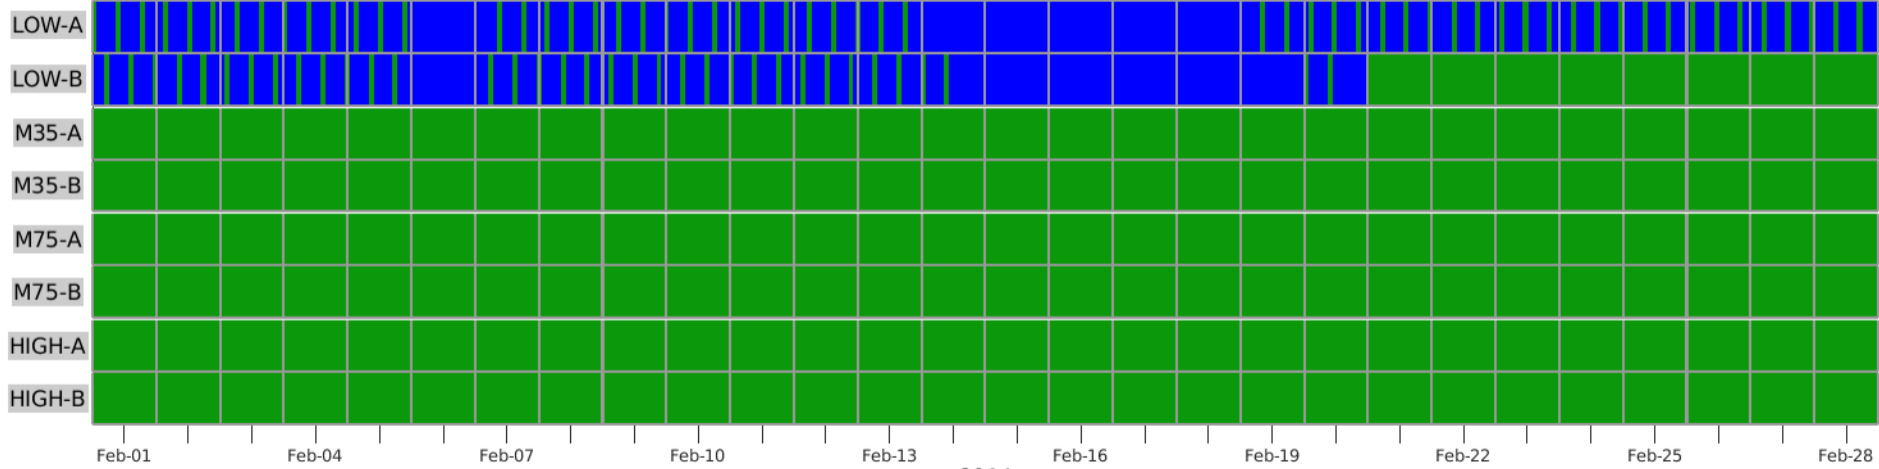

2014





MagEIS Instrument Mode | Created on: 2021/10/21 | Green = Science | Blue = High-Rate | Red = Maintenance | White = Missing Data

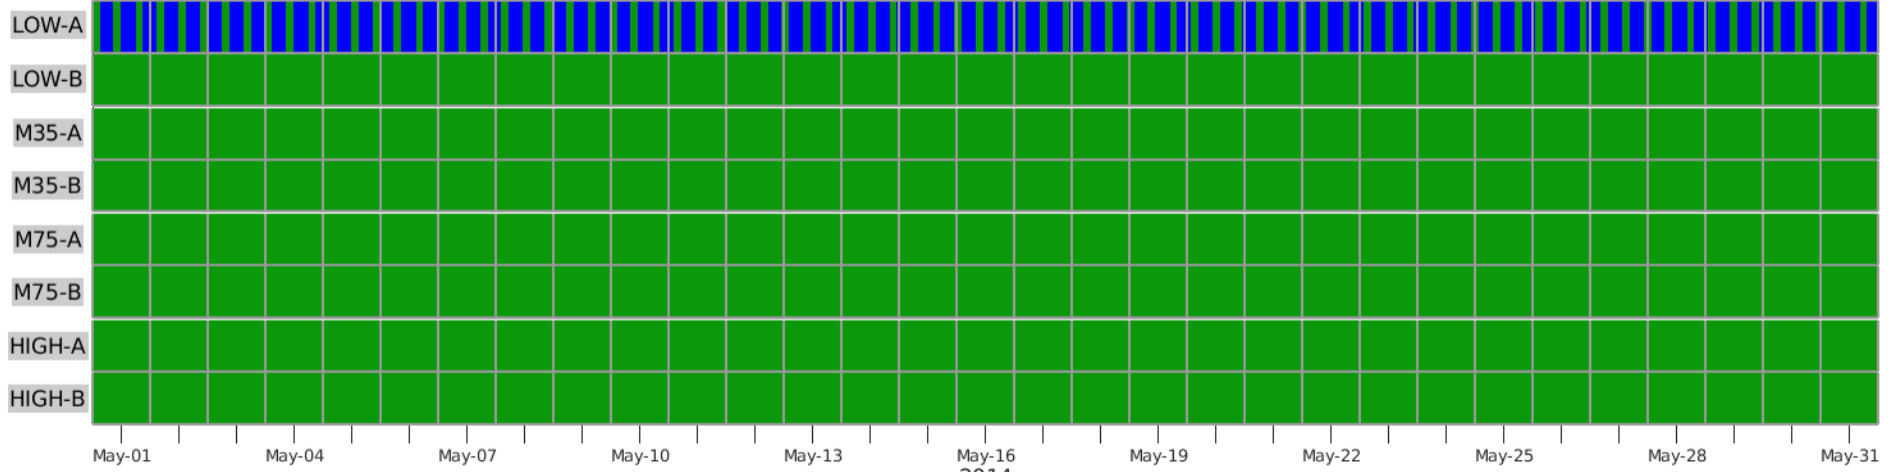

MagEIS Instrument Mode | Created on: 2021/10/21 | Green = Science | Blue = High-Rate | Red = Maintenance | White = Missing Data

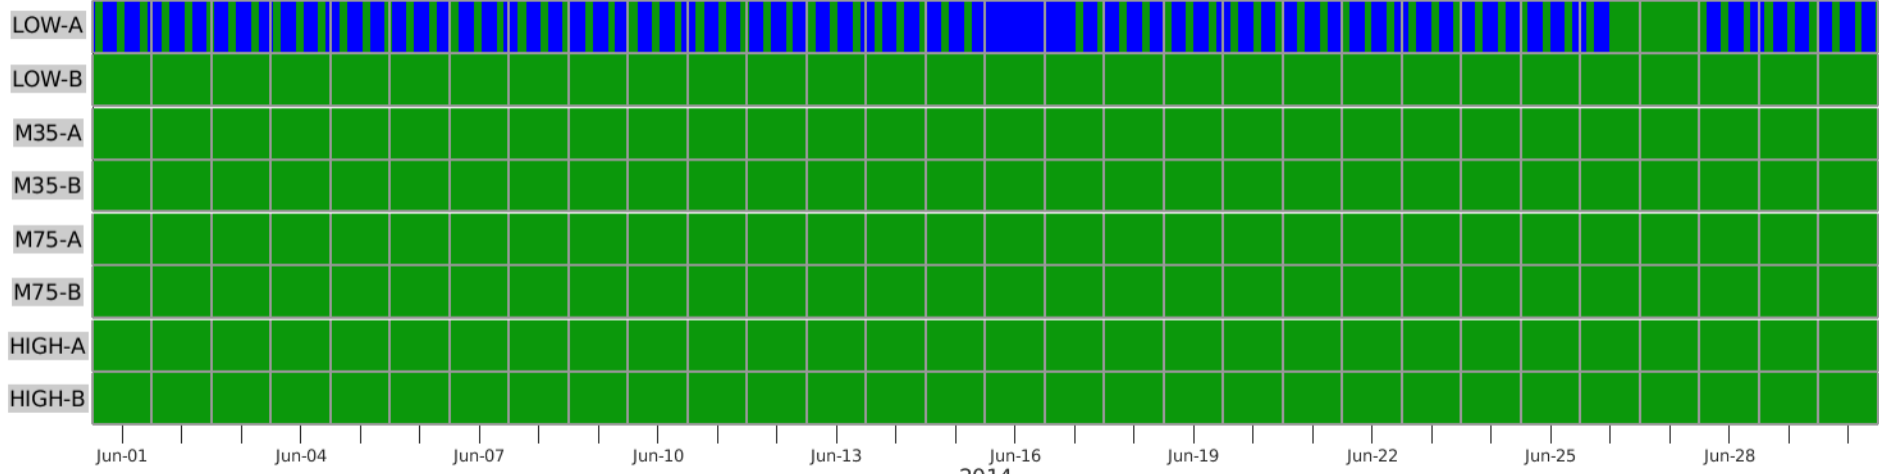

MagEIS Instrument Mode | Created on: 2021/10/21 | Green = Science | Blue = High-Rate | Red = Maintenance | White = Missing Data

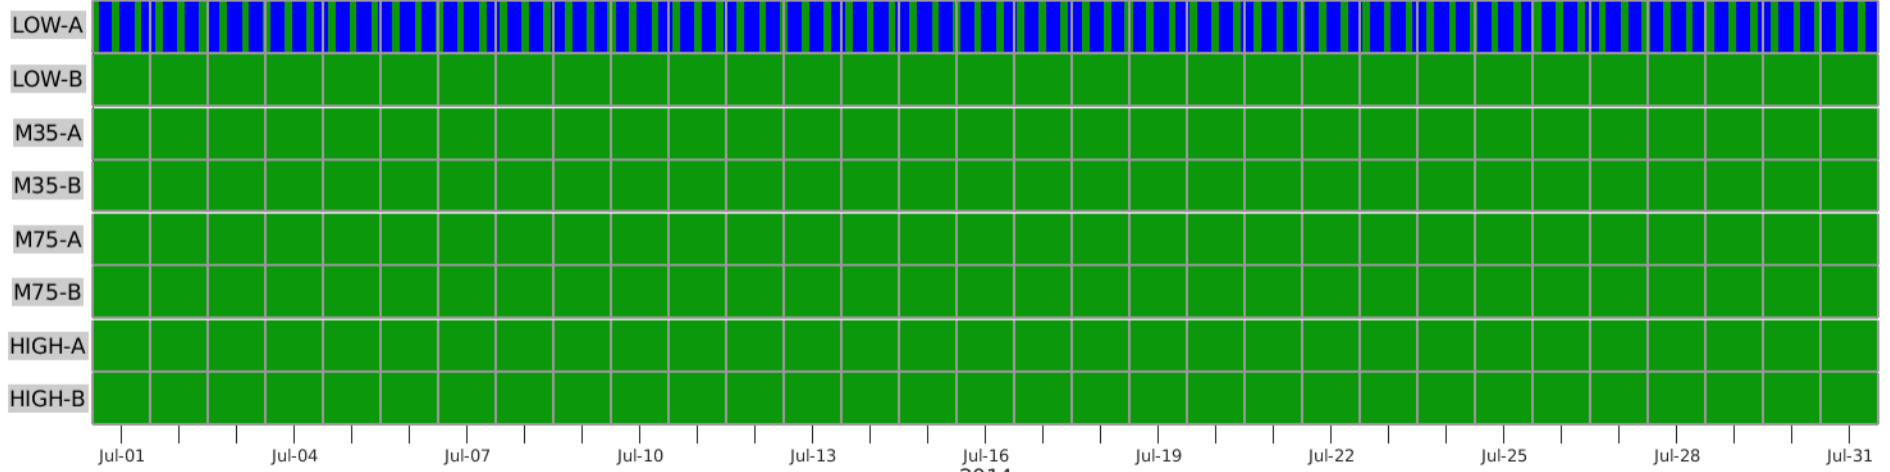





MagEIS Instrument Mode | Created on: 2021/10/21 | Green = Science | Blue = High-Rate | Red = Maintenance | White = Missing Data

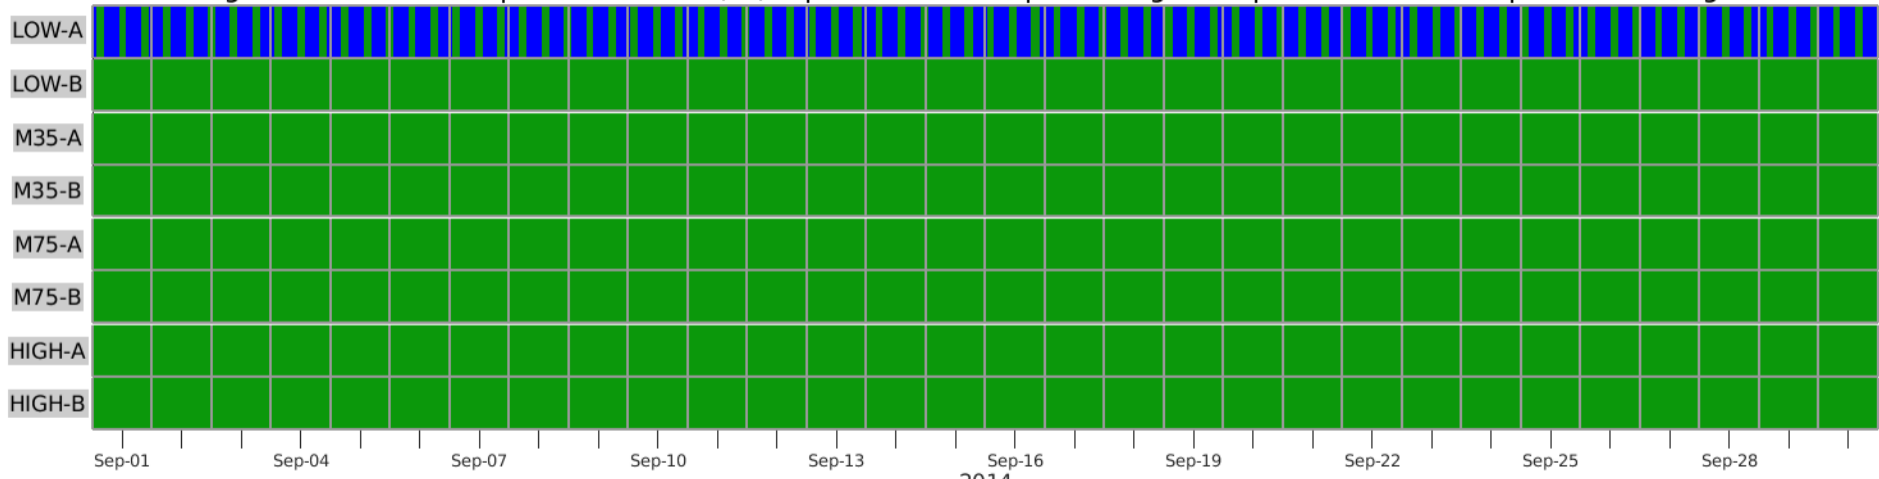

MagEIS Instrument Mode | Created on: 2021/10/21 | Green = Science | Blue = High-Rate | Red = Maintenance | White = Missing Data

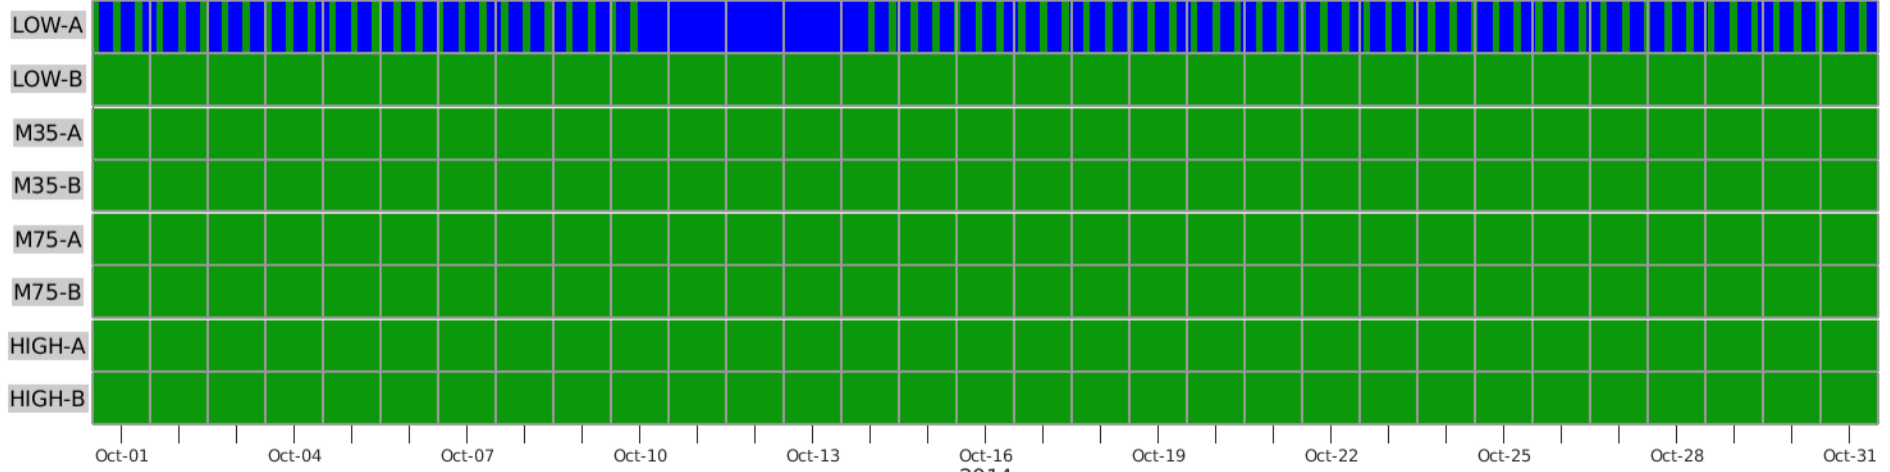

MagEIS Instrument Mode | Created on: 2021/10/21 | Green = Science | Blue = High-Rate | Red = Maintenance | White = Missing Data

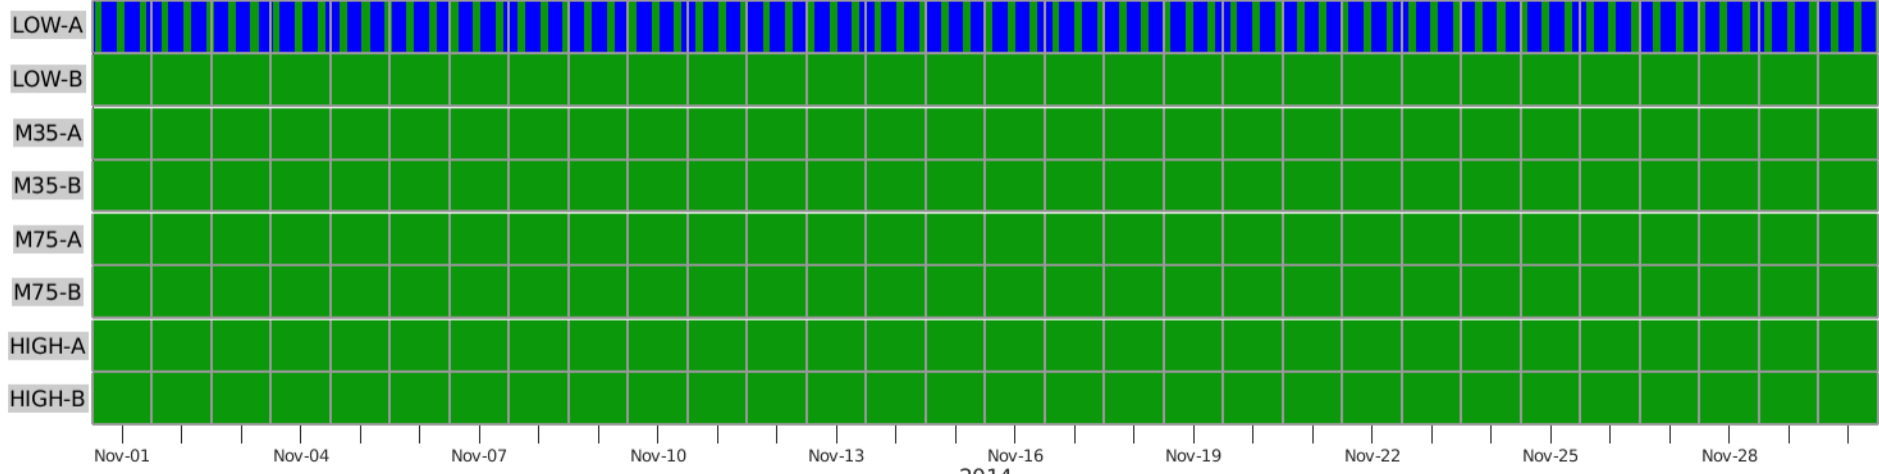



MagEIS Instrument Mode | Created on: 2021/10/21 | Green = Science | Blue = High-Rate | Red = Maintenance | White = Missing Data

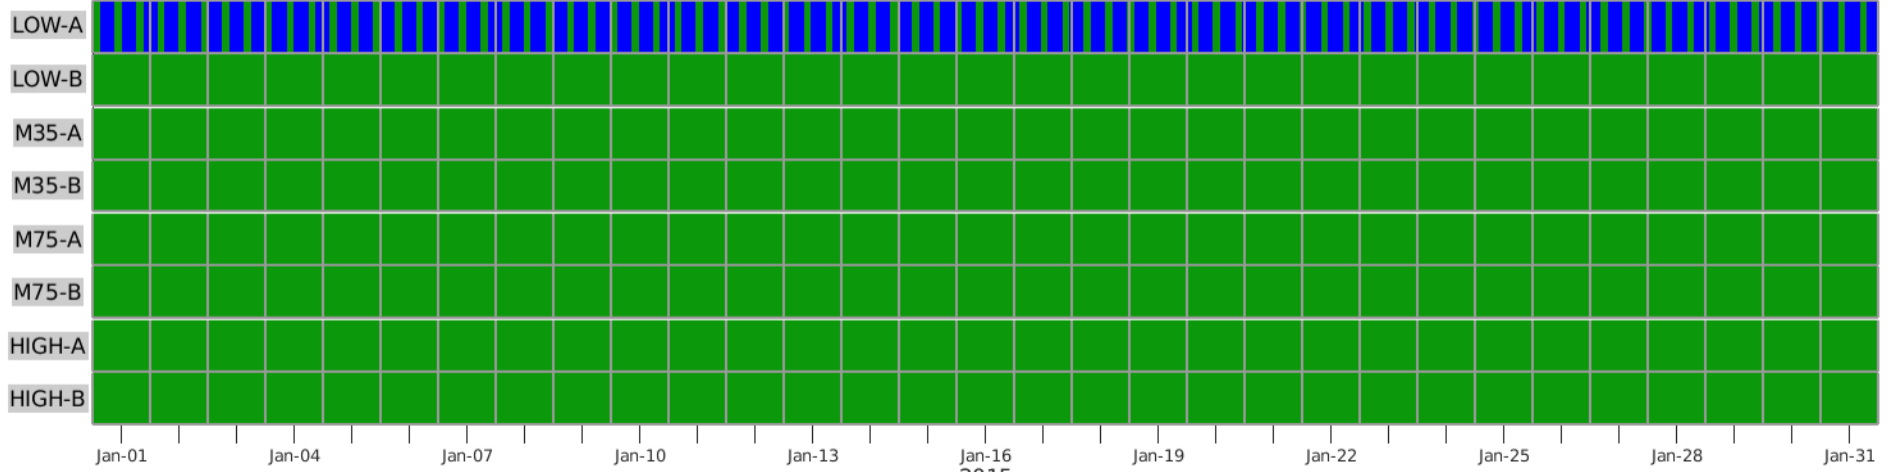

MagEIS Instrument Mode | Created on: 2021/10/21 | Green = Science | Blue = High-Rate | Red = Maintenance | White = Missing Data

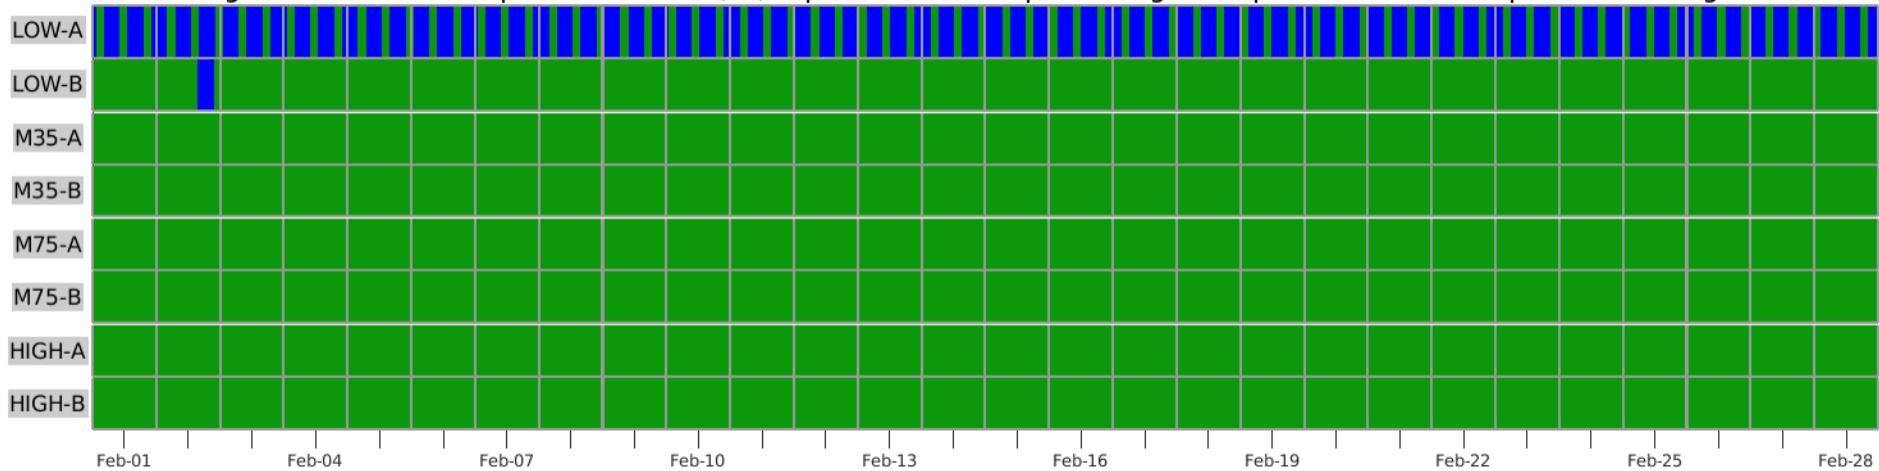

2015

MagEIS Instrument Mode | Created on: 2021/10/21 | Green = Science | Blue = High-Rate | Red = Maintenance | White = Missing Data

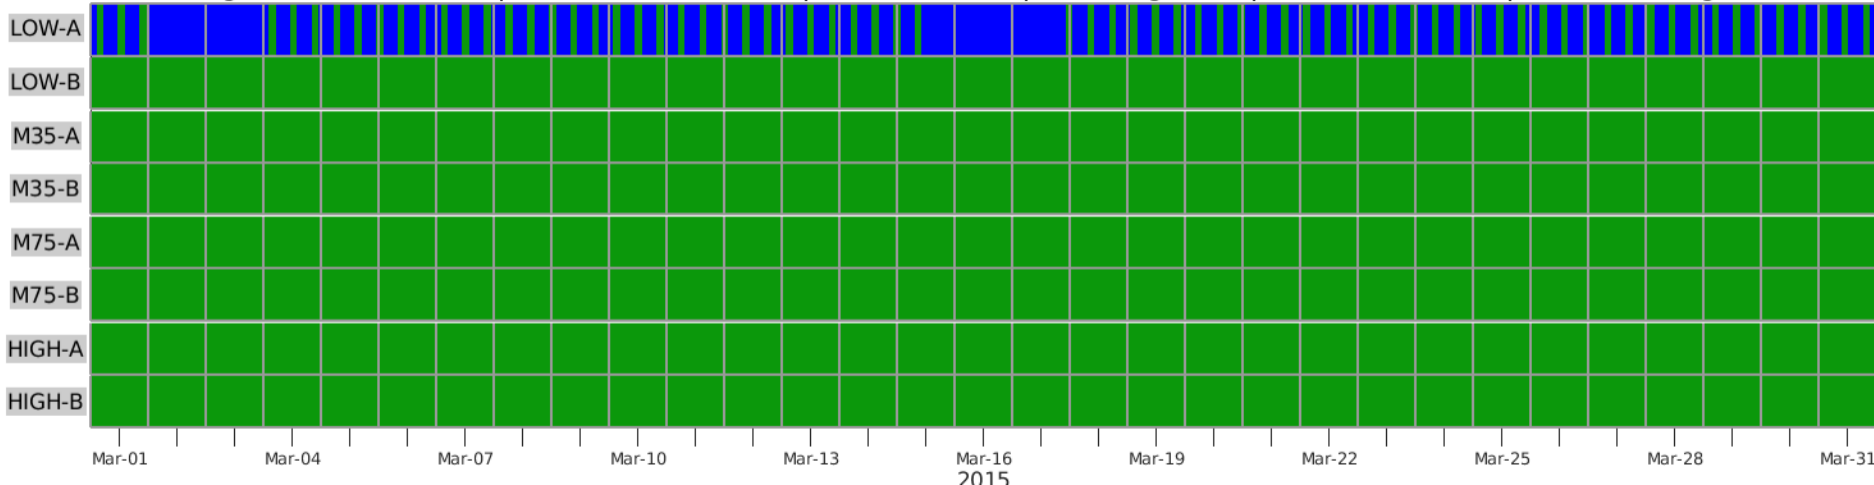

MagEIS Instrument Mode | Created on: 2021/10/21 | Green = Science | Blue = High-Rate | Red = Maintenance | White = Missing Data

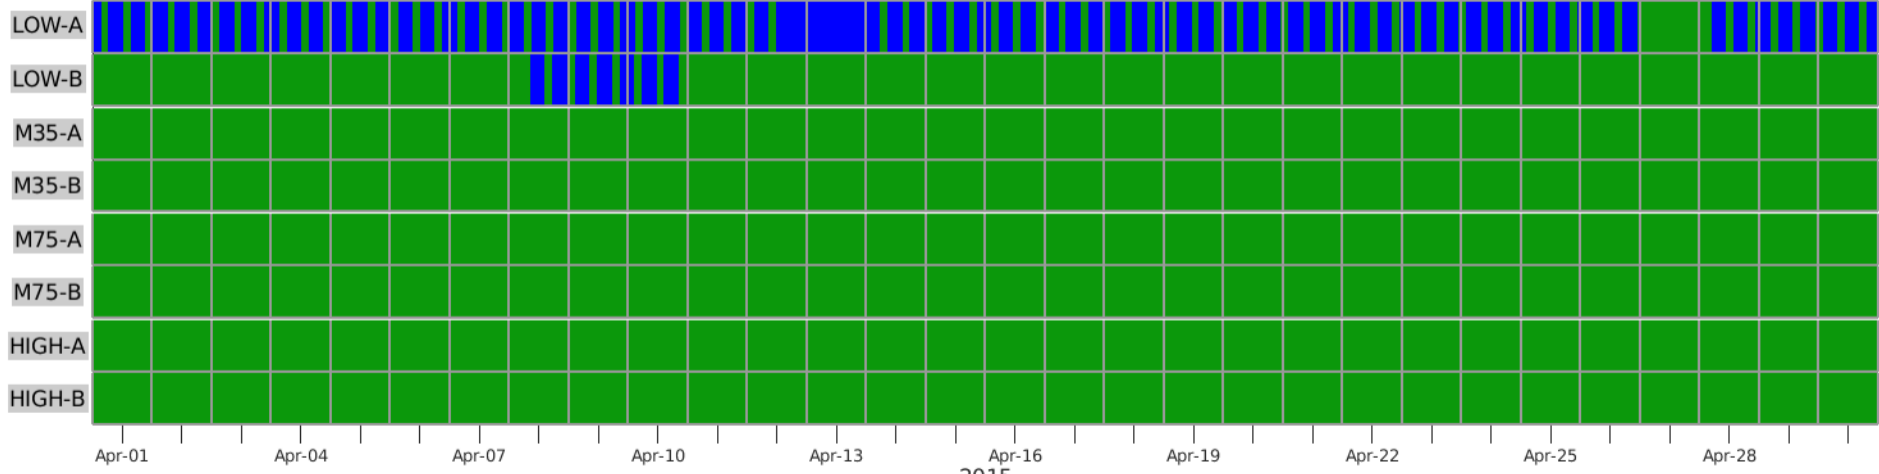



MagEIS Instrument Mode | Created on: 2021/10/21 | Green = Science | Blue = High-Rate | Red = Maintenance | White = Missing Data

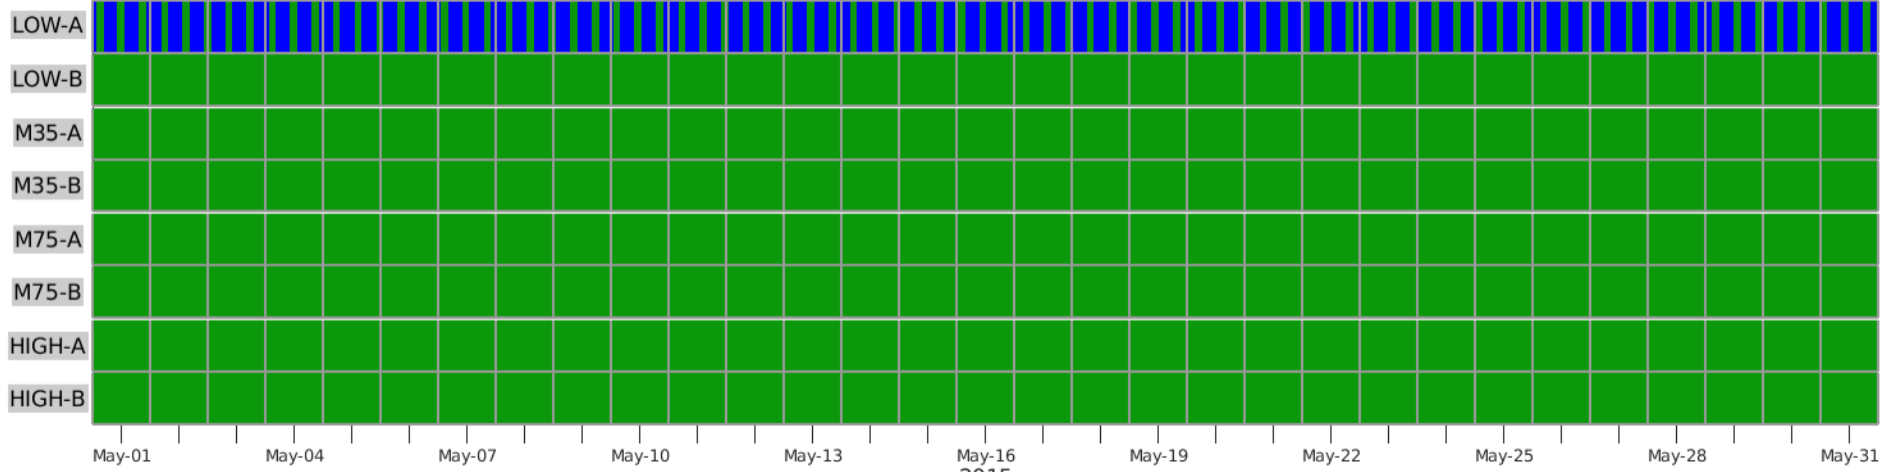

MagEIS Instrument Mode | Created on: 2021/10/21 | Green = Science | Blue = High-Rate | Red = Maintenance | White = Missing Data

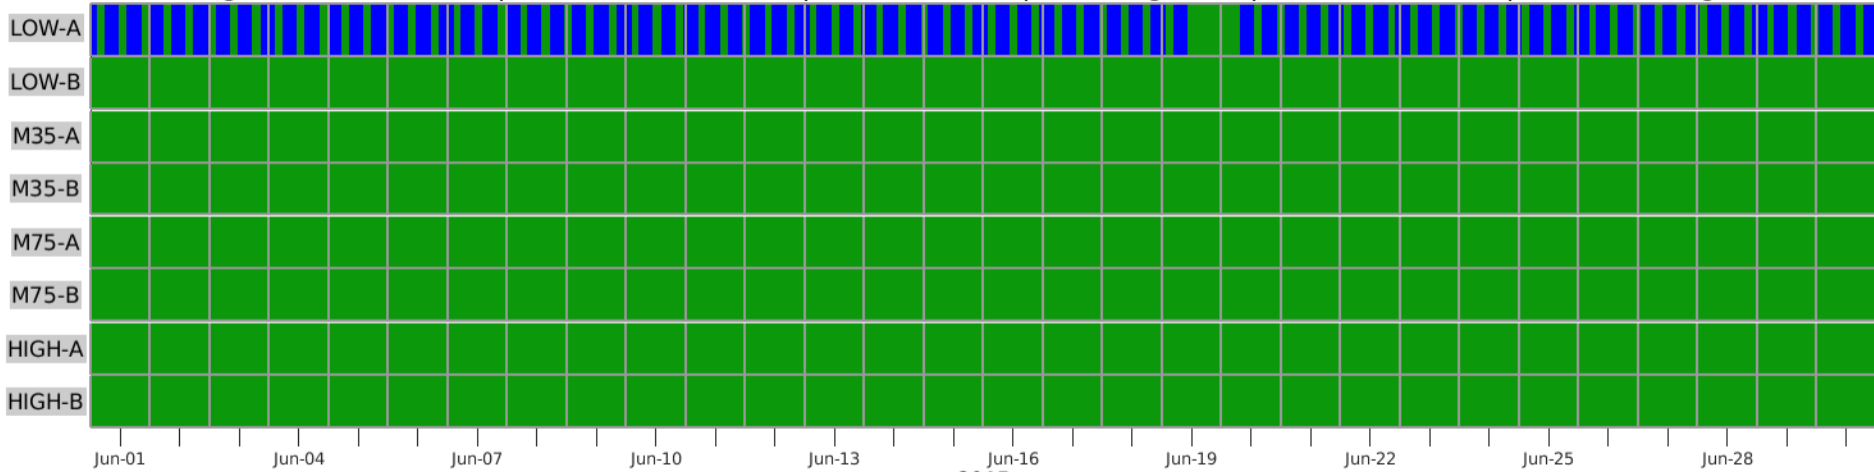

MagEIS Instrument Mode | Created on: 2021/10/21 | Green = Science | Blue = High-Rate | Red = Maintenance | White = Missing Data

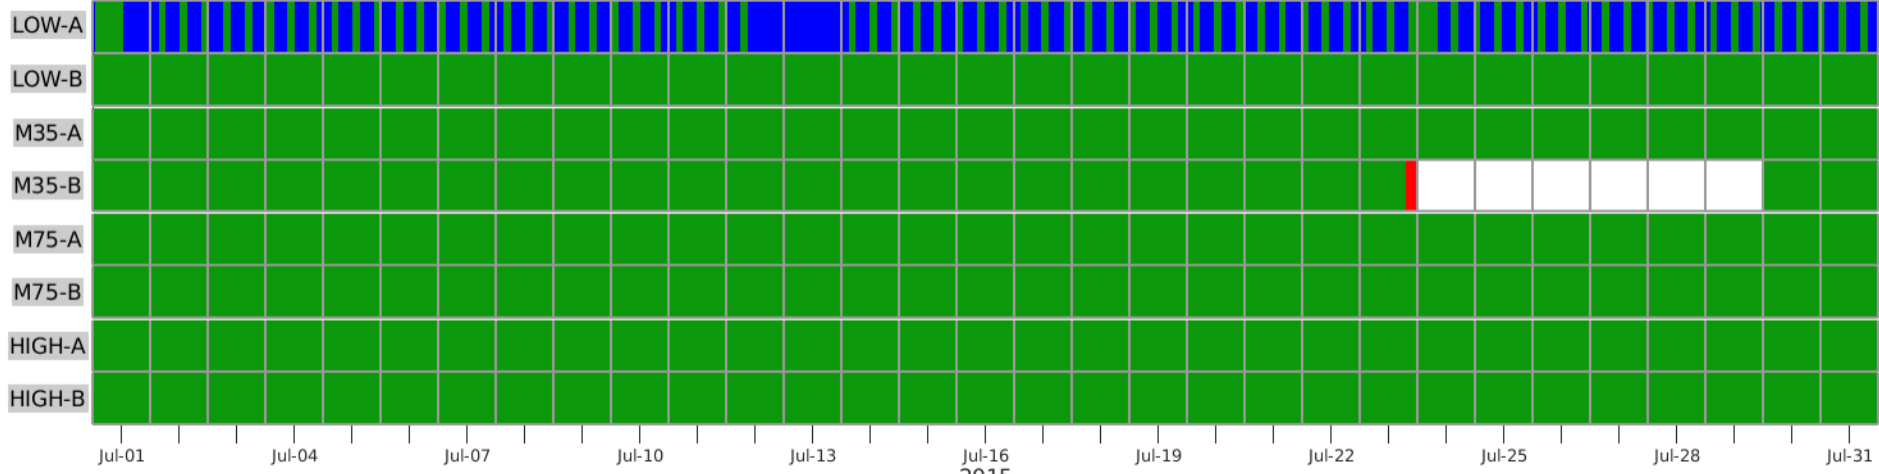



MagEIS Instrument Mode | Created on: 2021/10/21 | Green = Science | Blue = High-Rate | Red = Maintenance | White = Missing Data

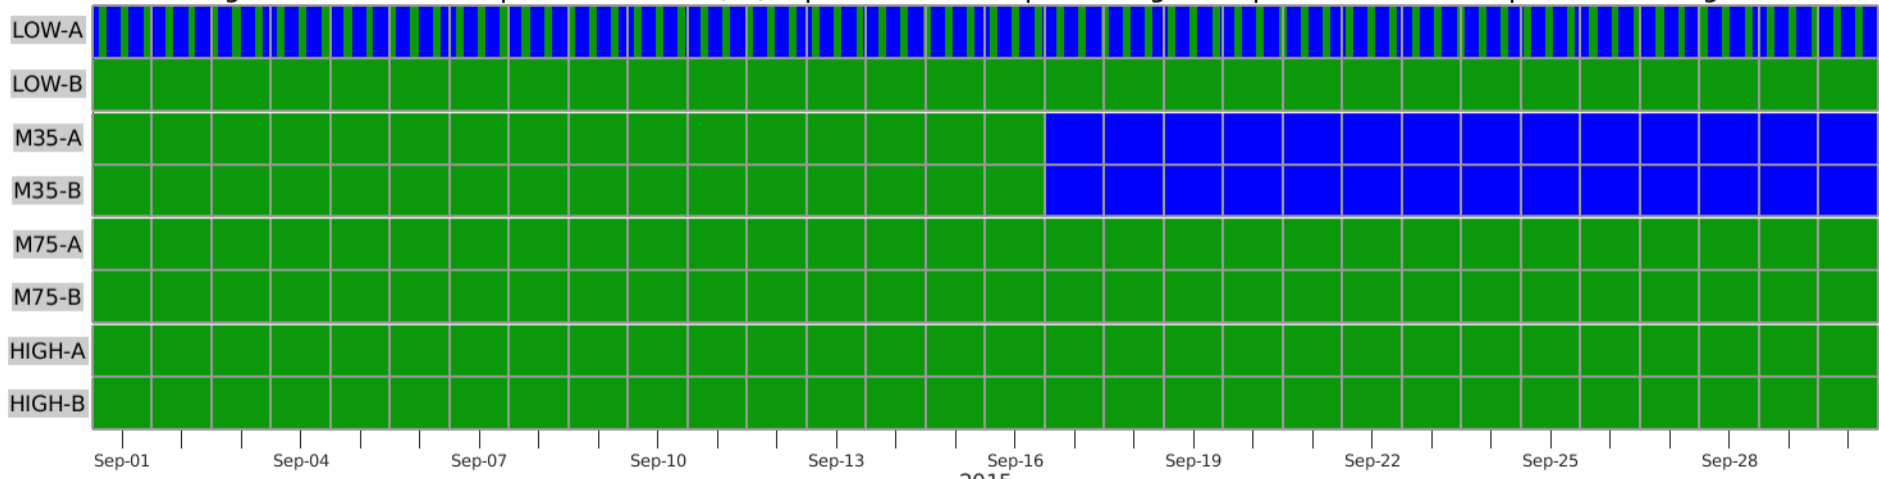

MagEIS Instrument Mode | Created on: 2021/10/21 | Green = Science | Blue = High-Rate | Red = Maintenance | White = Missing Data

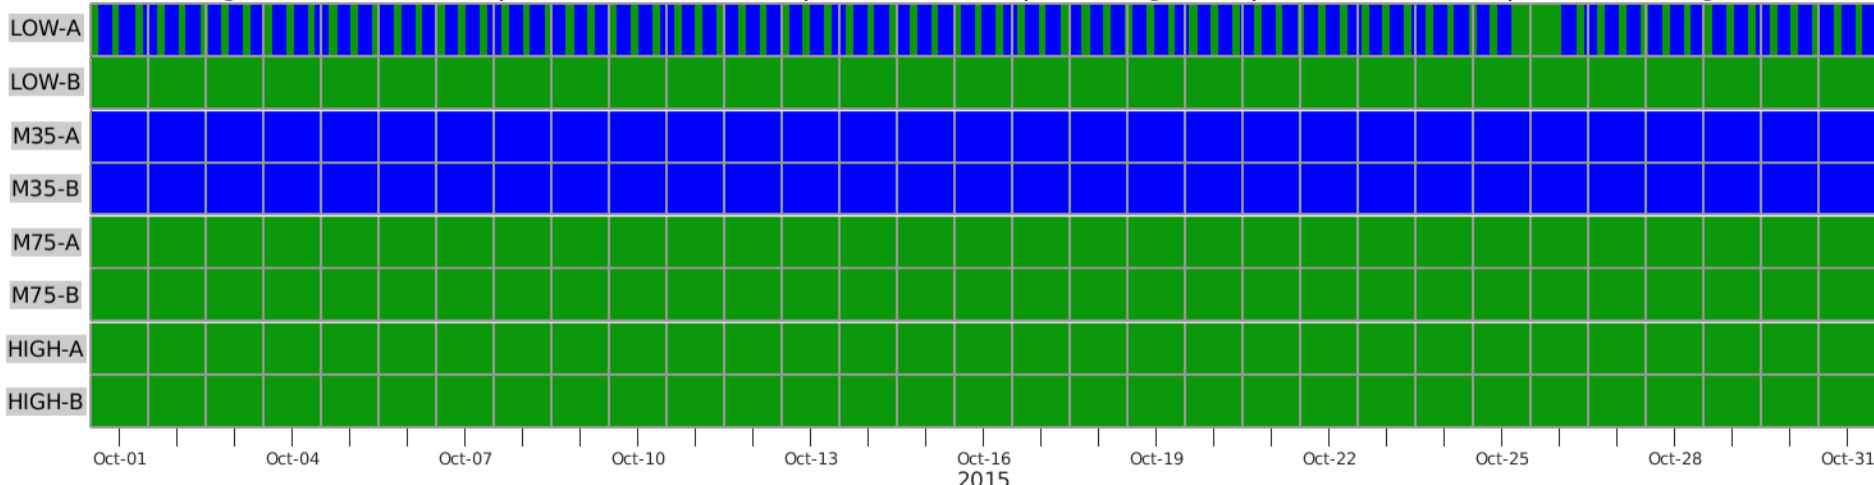







MagEIS Instrument Mode | Created on: 2021/10/21 | Green = Science | Blue = High-Rate | Red = Maintenance | White = Missing Data

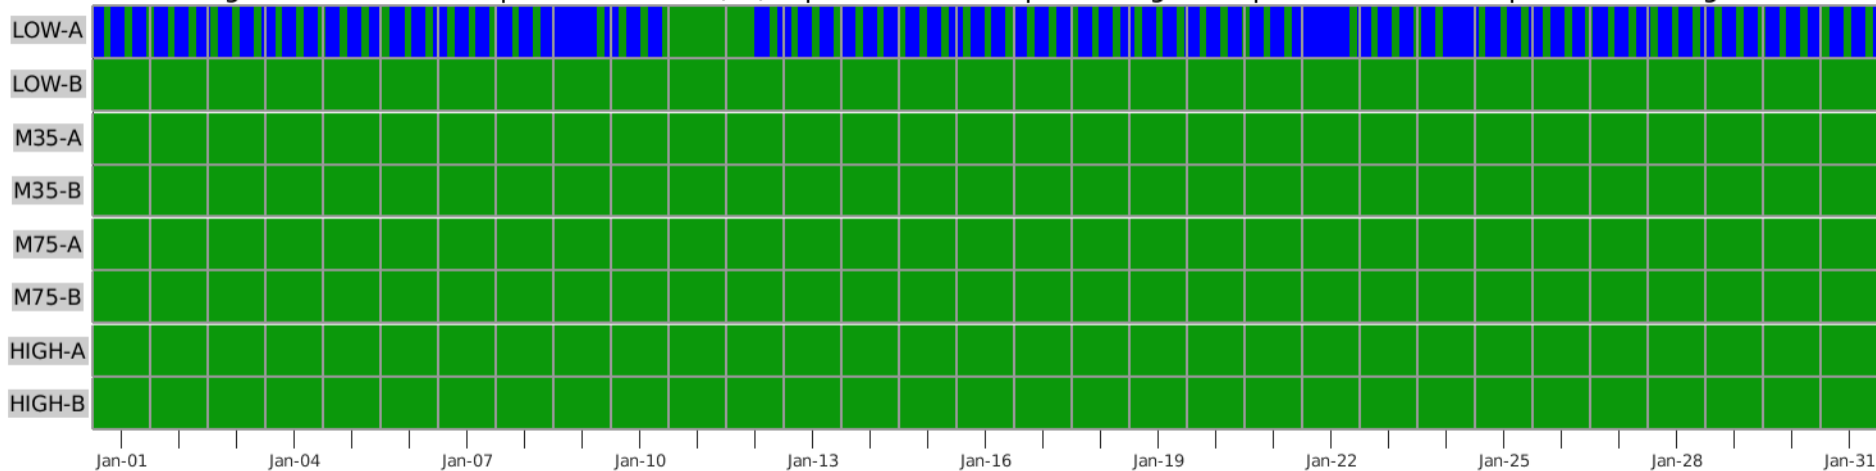



MagEIS Instrument Mode | Created on: 2021/10/21 | Green = Science | Blue = High-Rate | Red = Maintenance | White = Missing Data

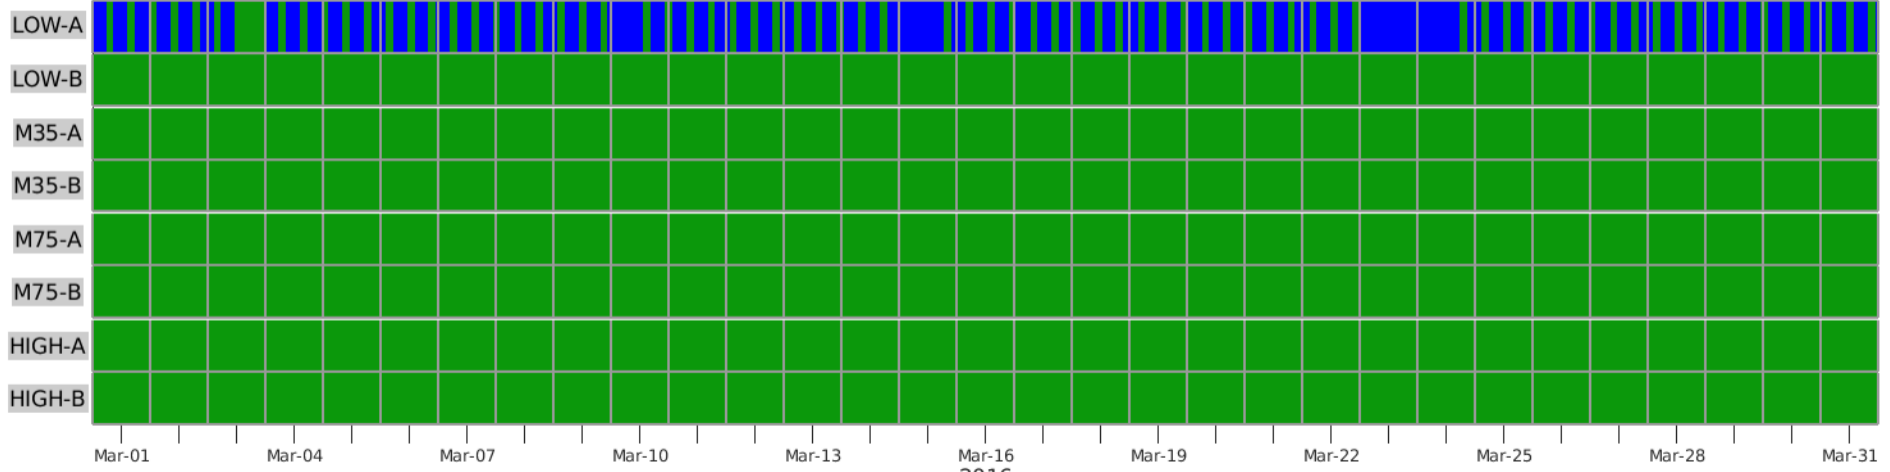

MagEIS Instrument Mode | Created on: 2021/10/21 | Green = Science | Blue = High-Rate | Red = Maintenance | White = Missing Data

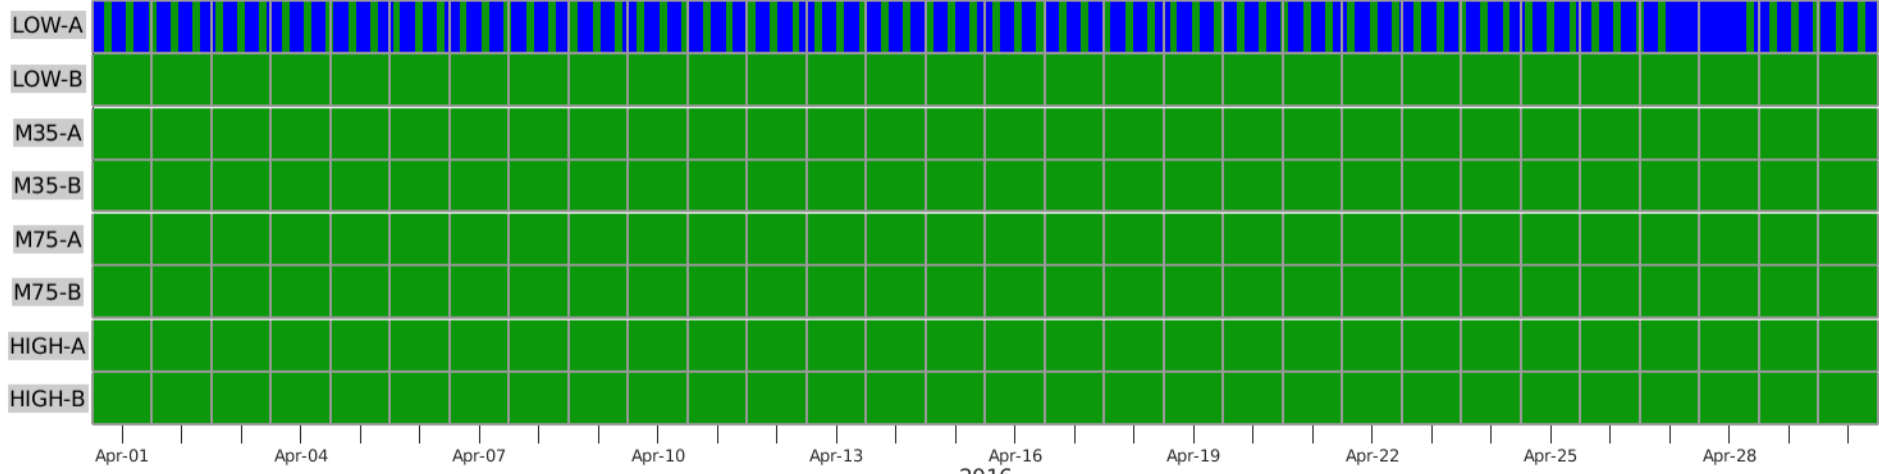

MagEIS Instrument Mode | Created on: 2021/10/21 | Green = Science | Blue = High-Rate | Red = Maintenance | White = Missing Data

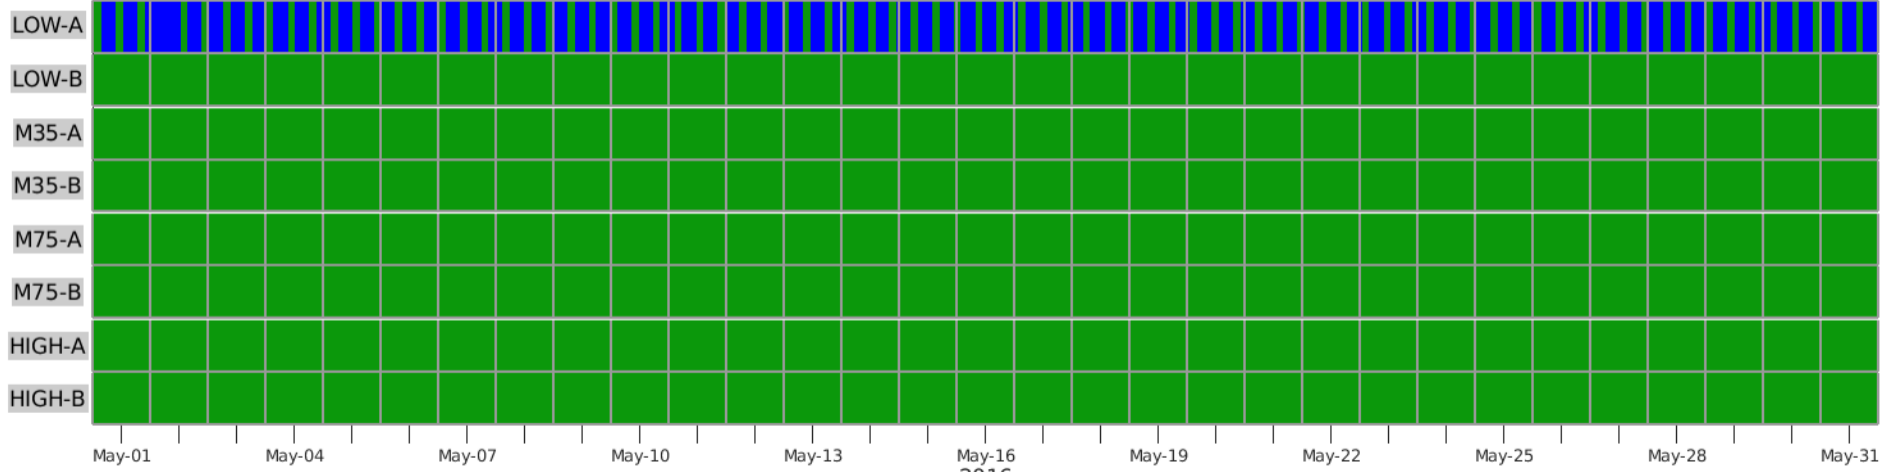

MagEIS Instrument Mode | Created on: 2021/10/21 | Green = Science | Blue = High-Rate | Red = Maintenance | White = Missing Data

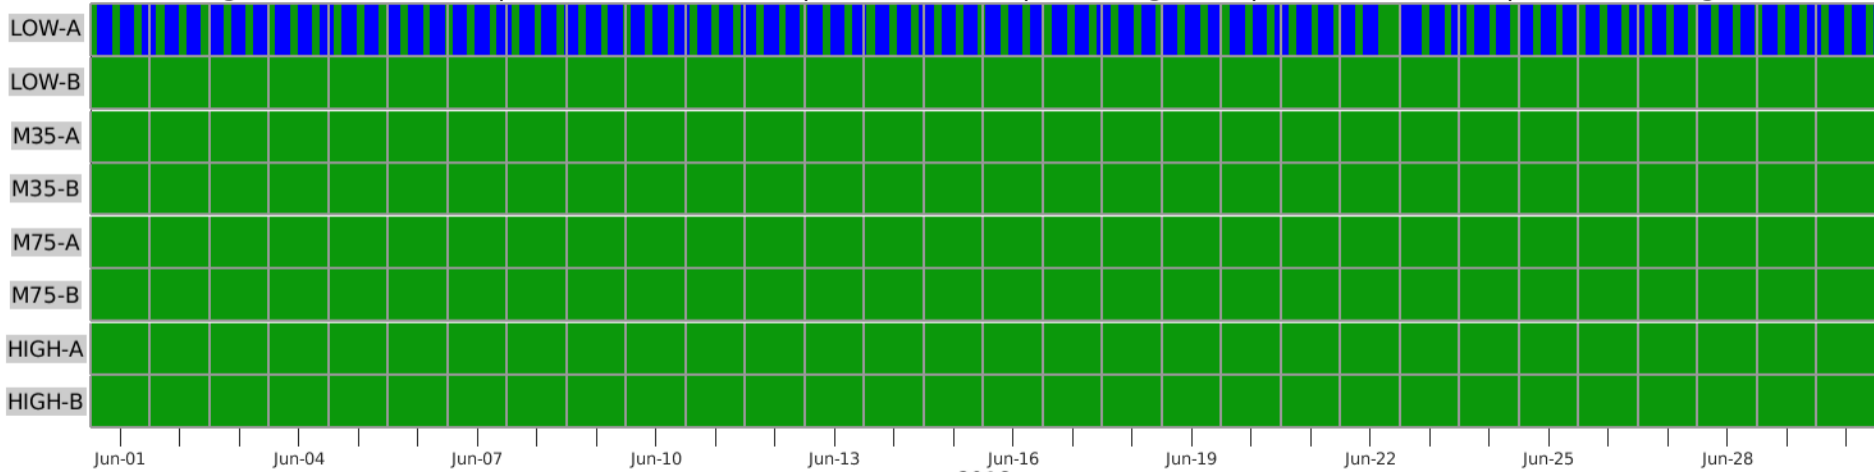

MagEIS Instrument Mode | Created on: 2021/10/21 | Green = Science | Blue = High-Rate | Red = Maintenance | White = Missing Data

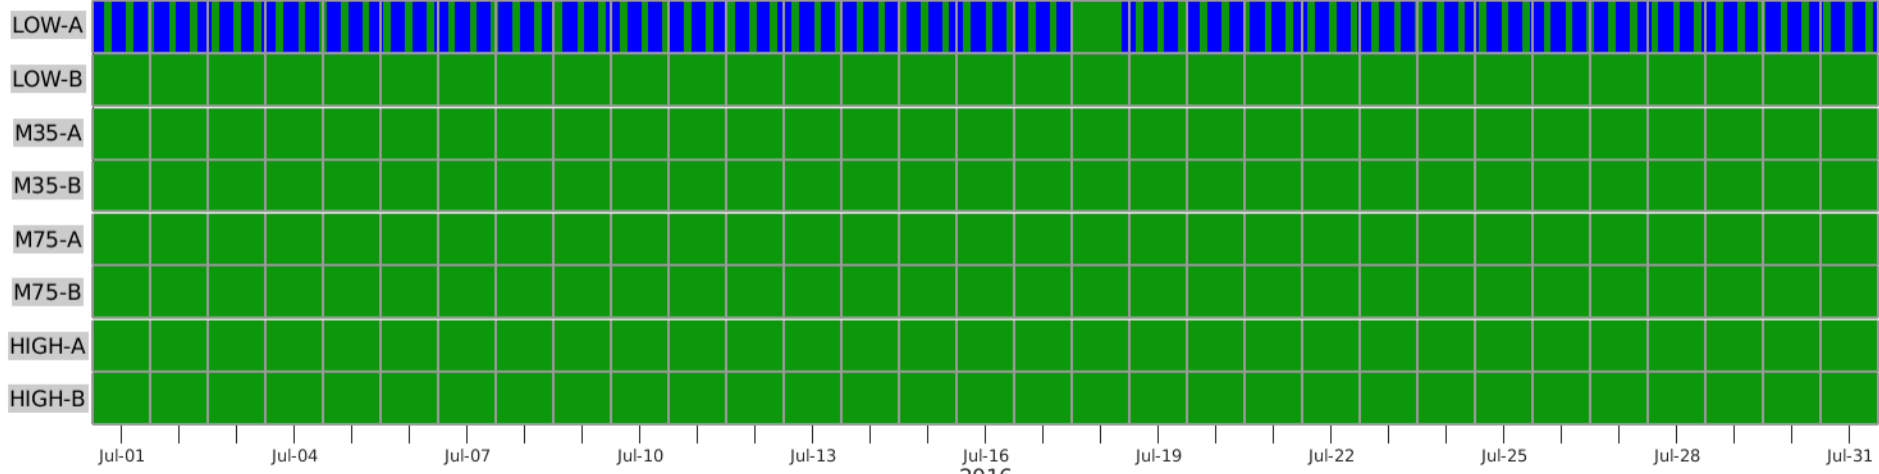







MagEIS Instrument Mode | Created on: 2021/10/21 | Green = Science | Blue = High-Rate | Red = Maintenance | White = Missing Data

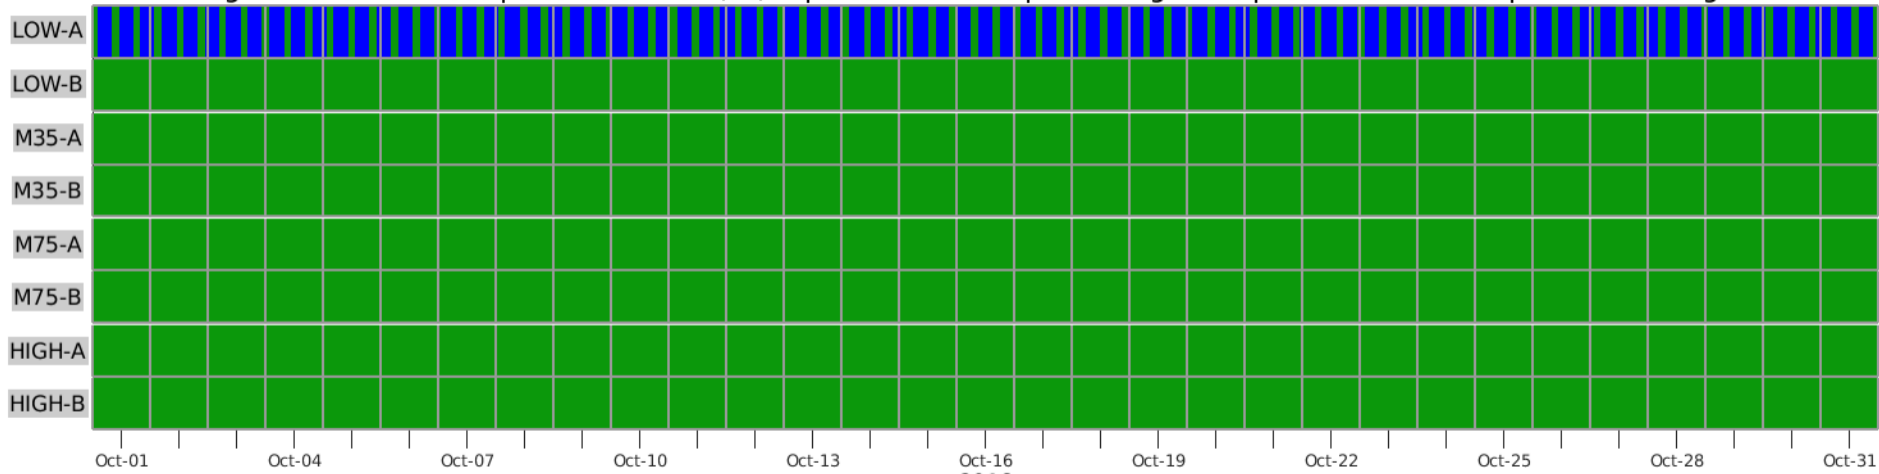









MagEIS Instrument Mode | Created on: 2021/10/21 | Green = Science | Blue = High-Rate | Red = Maintenance | White = Missing Data

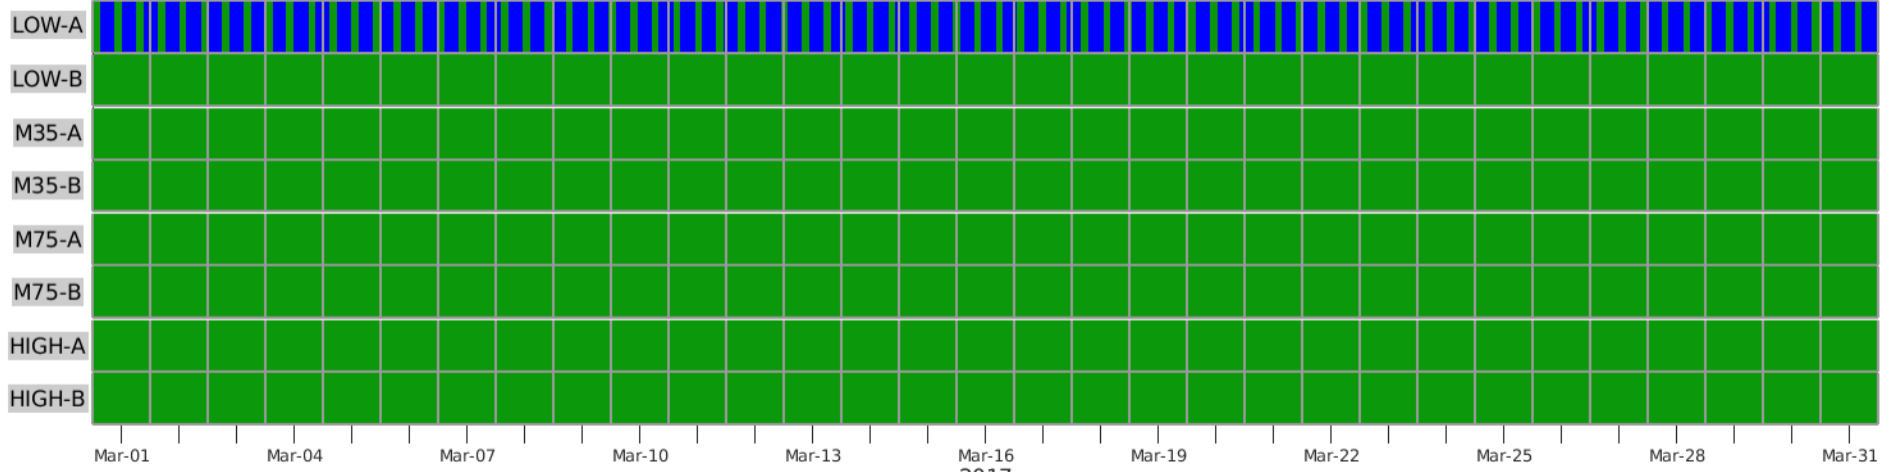

MagEIS Instrument Mode | Created on: 2021/10/21 | Green = Science | Blue = High-Rate | Red = Maintenance | White = Missing Data

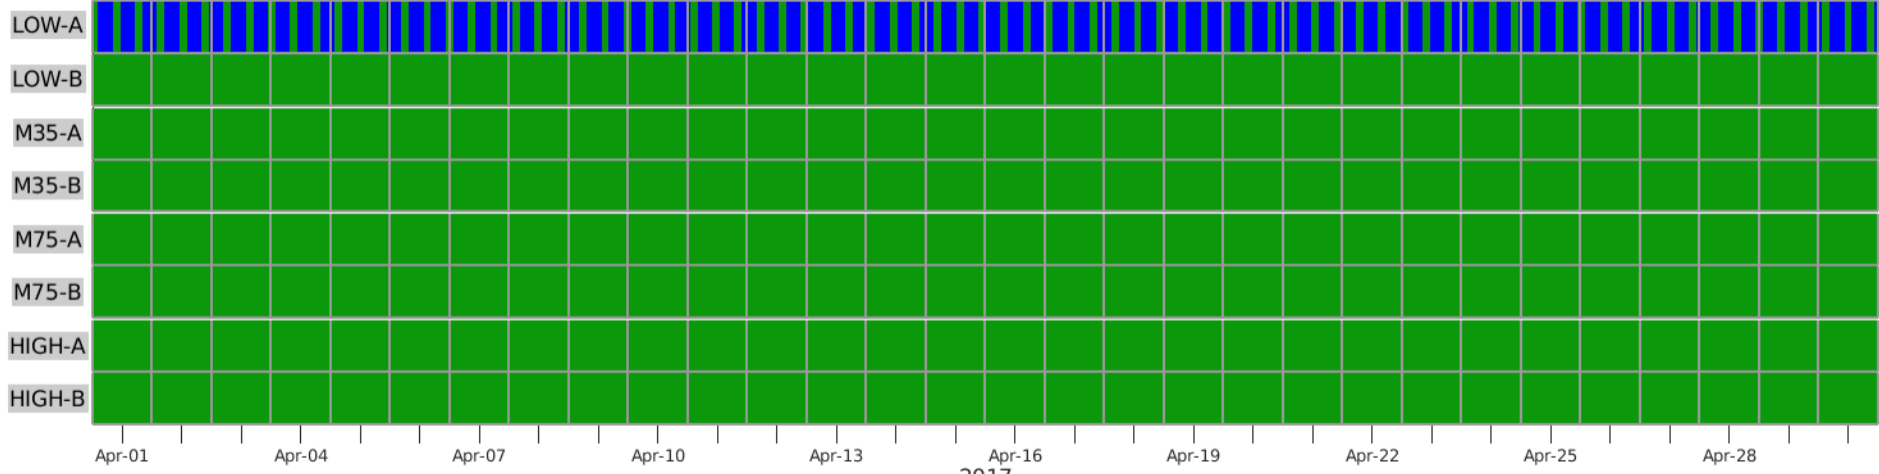



MagEIS Instrument Mode | Created on: 2021/10/21 | Green = Science | Blue = High-Rate | Red = Maintenance | White = Missing Data

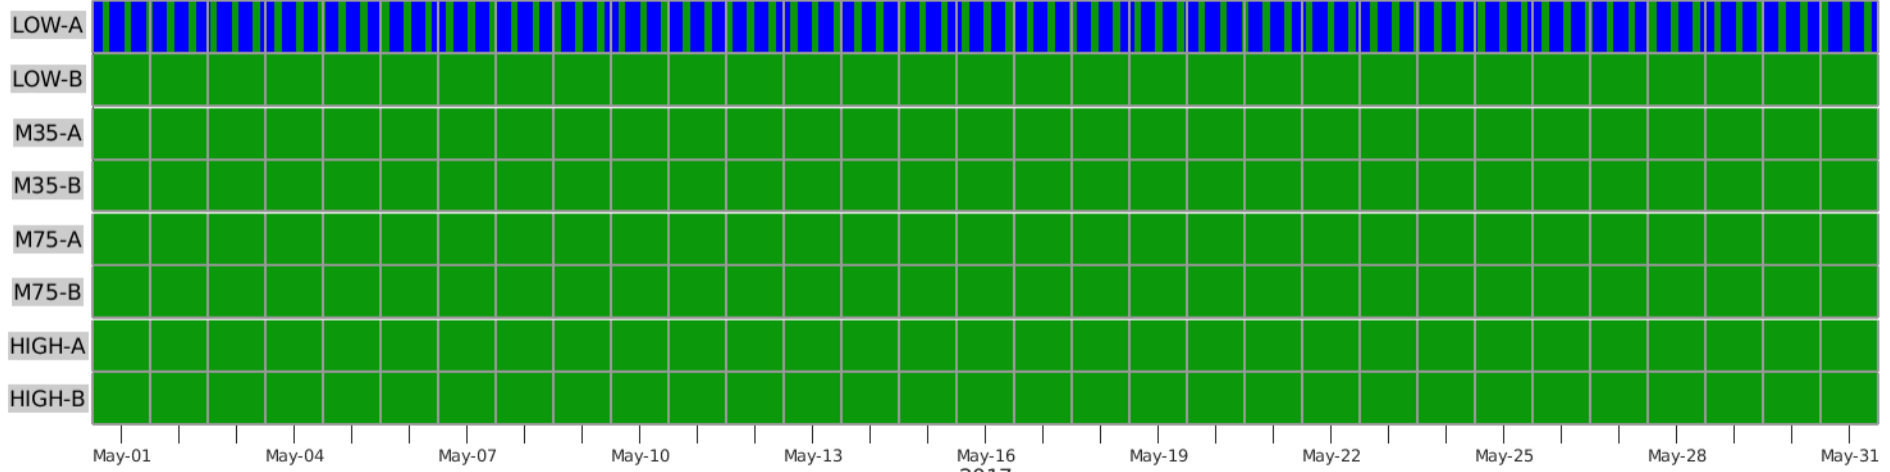

MagEIS Instrument Mode | Created on: 2021/10/21 | Green = Science | Blue = High-Rate | Red = Maintenance | White = Missing Data

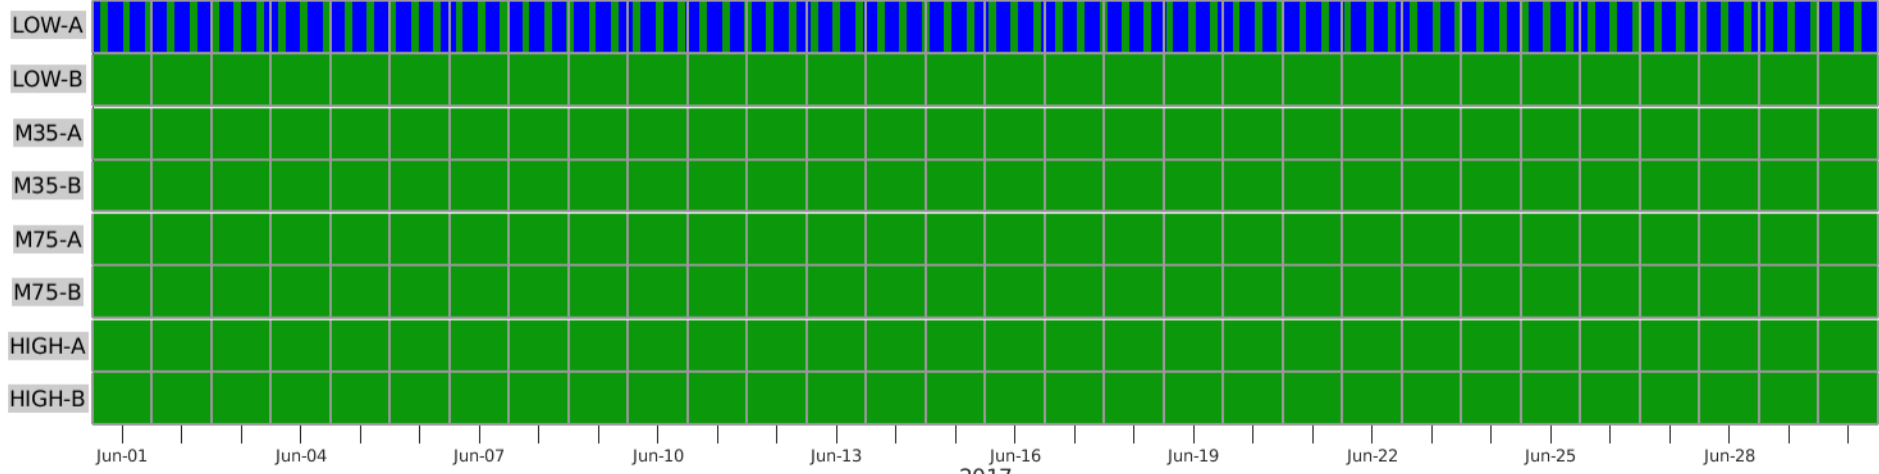

MagEIS Instrument Mode | Created on: 2021/10/21 | Green = Science | Blue = High-Rate | Red = Maintenance | White = Missing Data

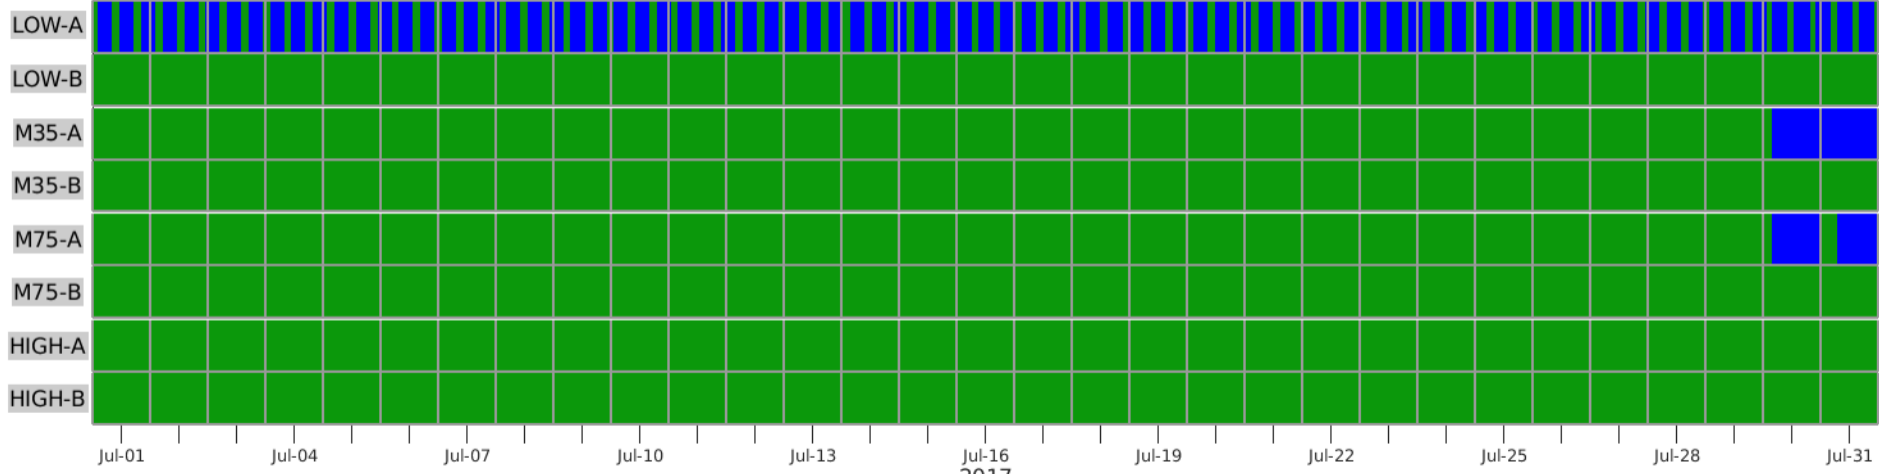



MagEIS Instrument Mode | Created on: 2021/10/21 | Green = Science | Blue = High-Rate | Red = Maintenance | White = Missing Data

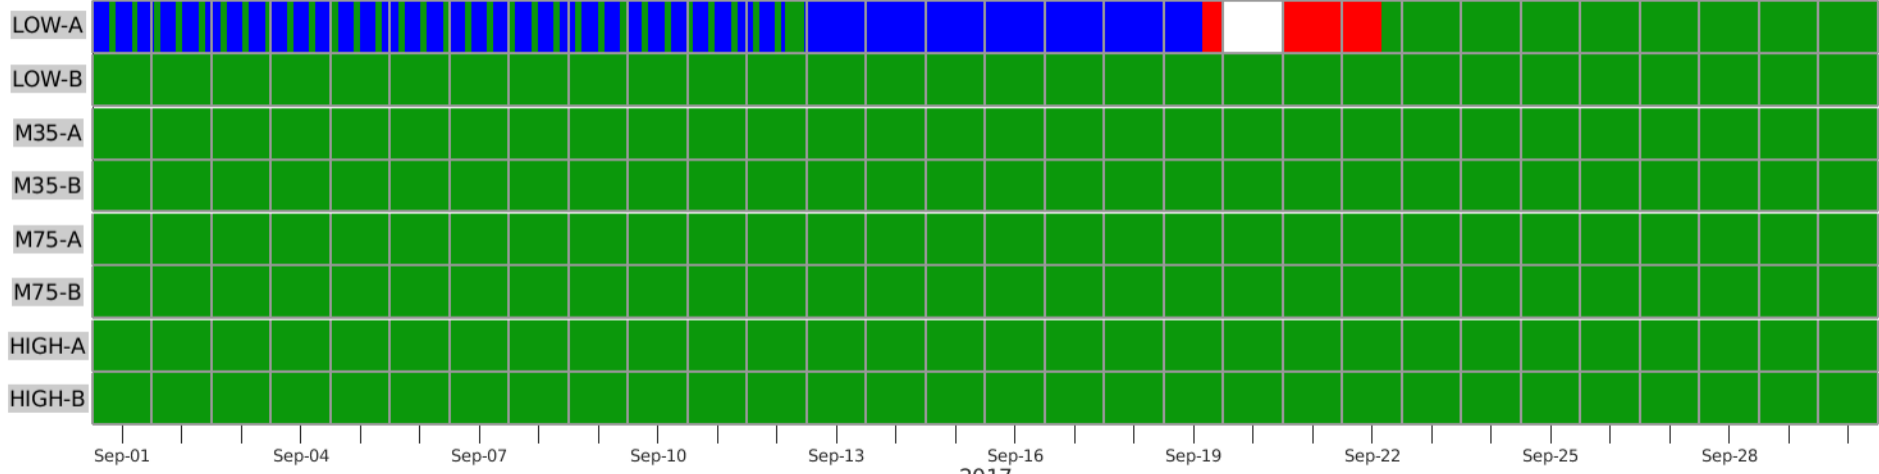



MagEIS Instrument Mode | Created on: 2021/10/21 | Green = Science | Blue = High-Rate | Red = Maintenance | White = Missing Data

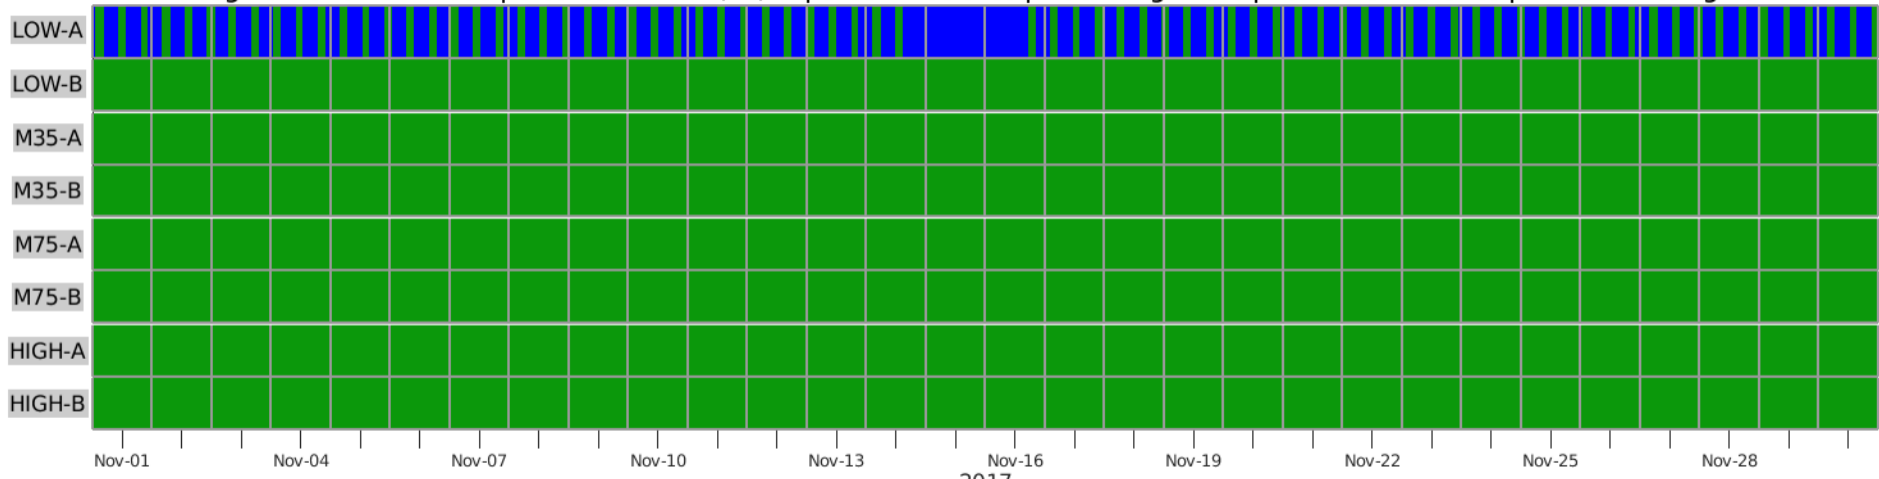

MagEIS Instrument Mode | Created on: 2021/10/21 | Green = Science | Blue = High-Rate | Red = Maintenance | White = Missing Data

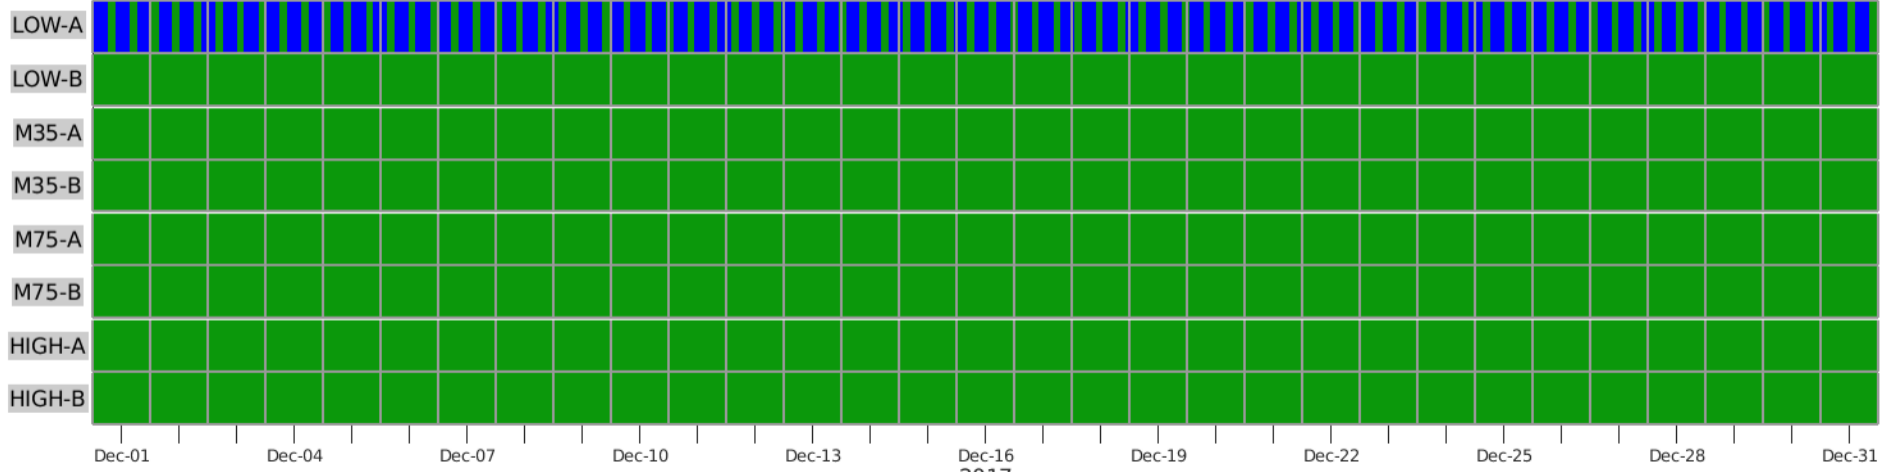







MagEIS Instrument Mode | Created on: 2021/10/21 | Green = Science | Blue = High-Rate | Red = Maintenance | White = Missing Data

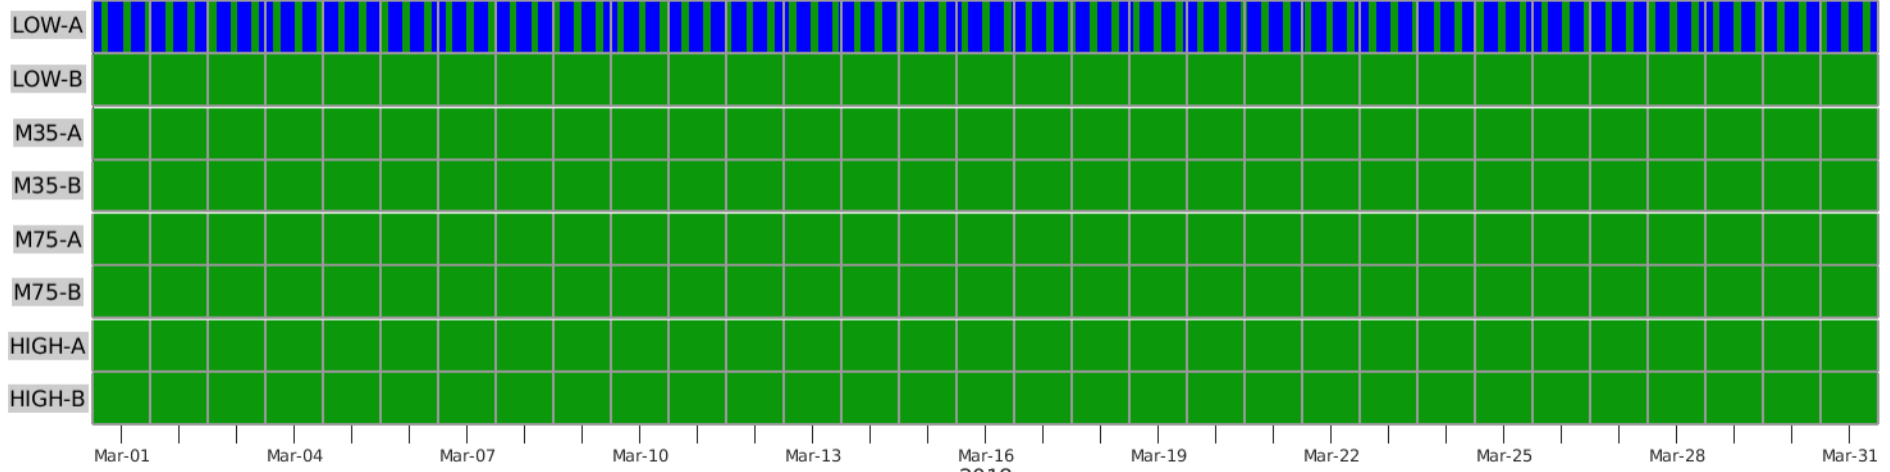

MagEIS Instrument Mode | Created on: 2021/10/21 | Green = Science | Blue = High-Rate | Red = Maintenance | White = Missing Data

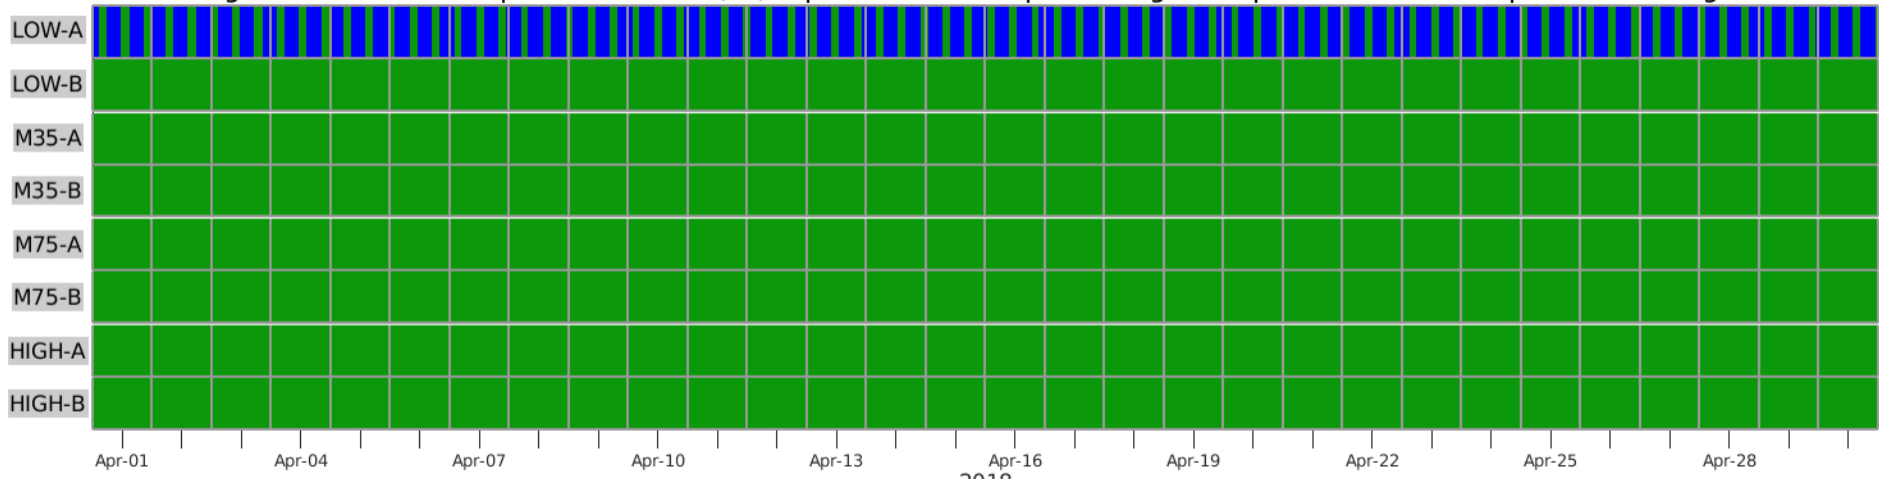

MagEIS Instrument Mode | Created on: 2021/10/21 | Green = Science | Blue = High-Rate | Red = Maintenance | White = Missing Data

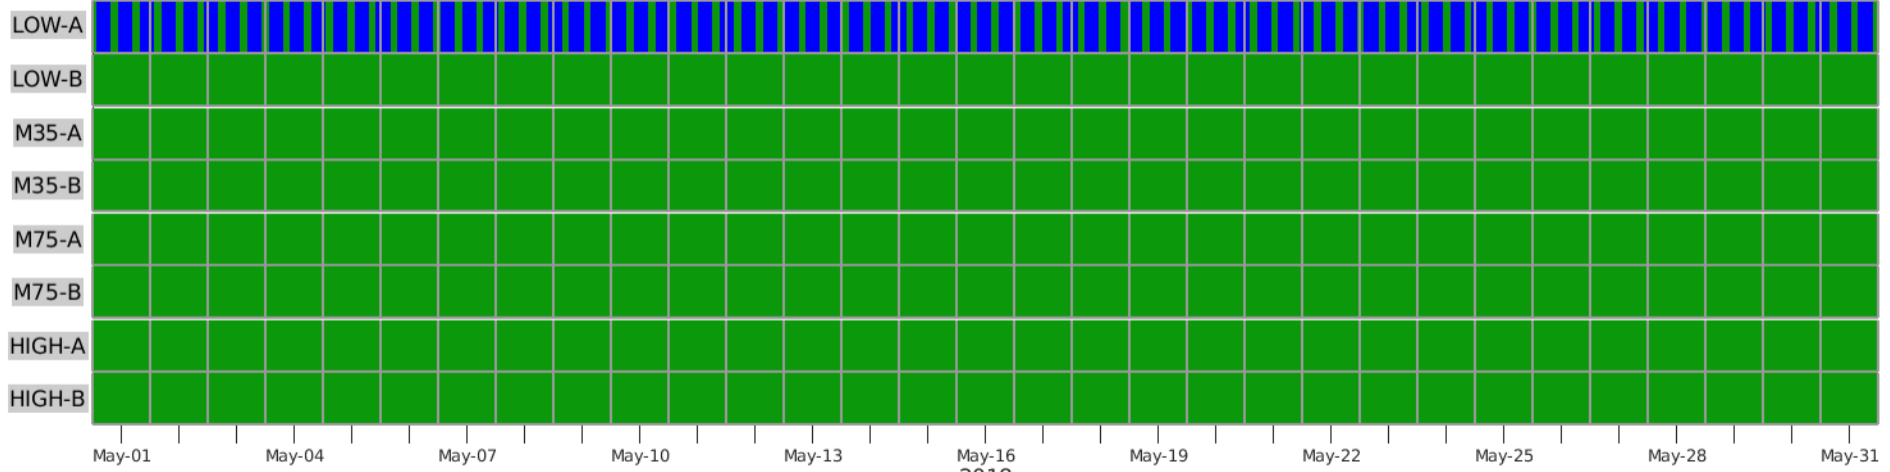



MagEIS Instrument Mode | Created on: 2021/10/21 | Green = Science | Blue = High-Rate | Red = Maintenance | White = Missing Data

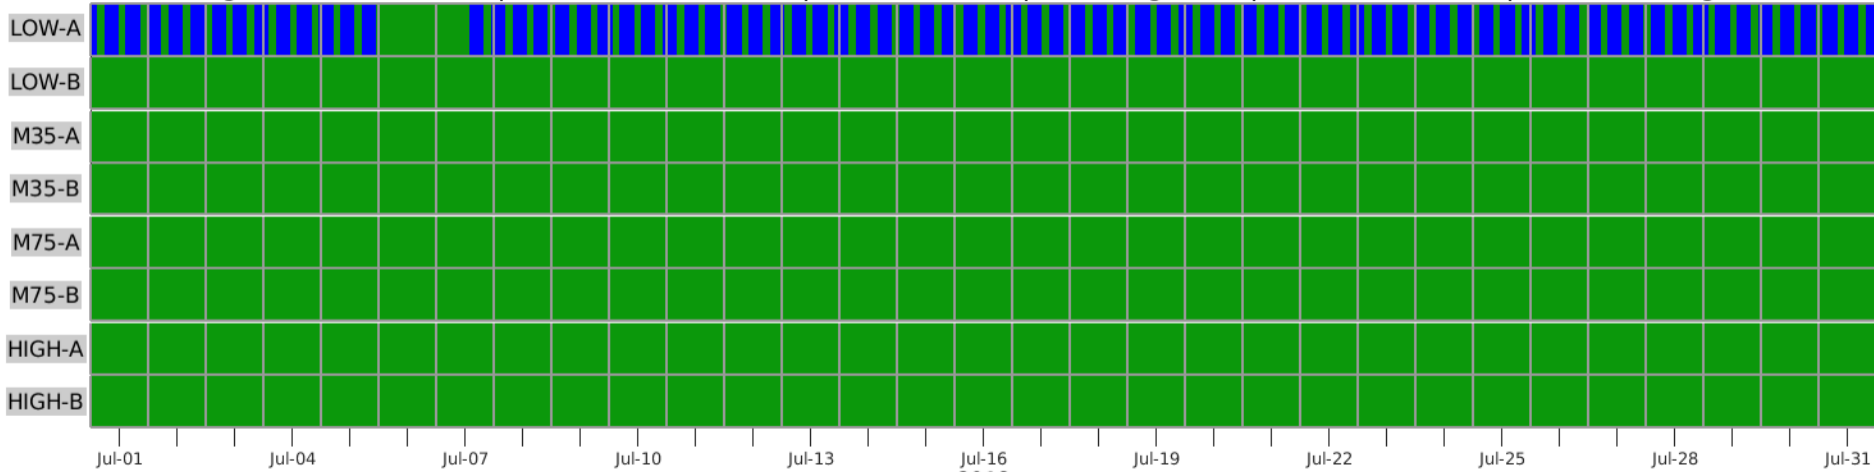





MagEIS Instrument Mode | Created on: 2021/10/21 | Green = Science | Blue = High-Rate | Red = Maintenance | White = Missing Data

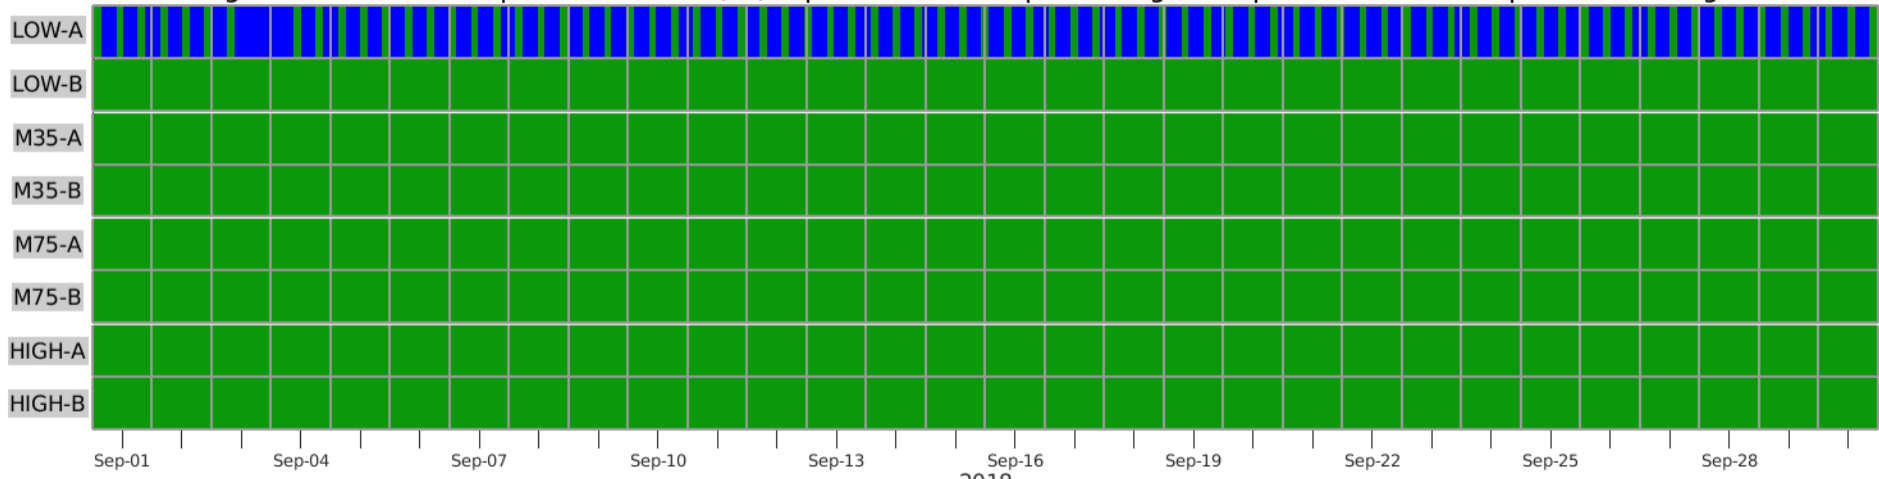







MagEIS Instrument Mode | Created on: 2021/10/21 | Green = Science | Blue = High-Rate | Red = Maintenance | White = Missing Data

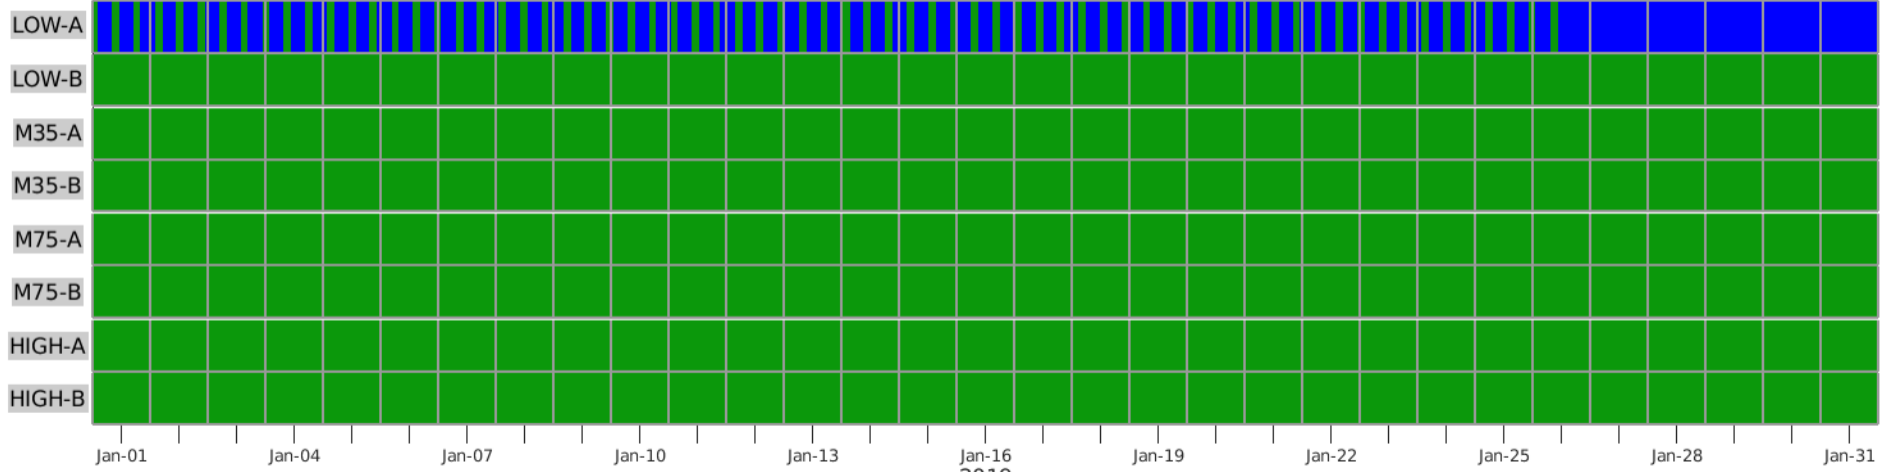



MagEIS Instrument Mode | Created on: 2021/10/21 | Green = Science | Blue = High-Rate | Red = Maintenance | White = Missing Data

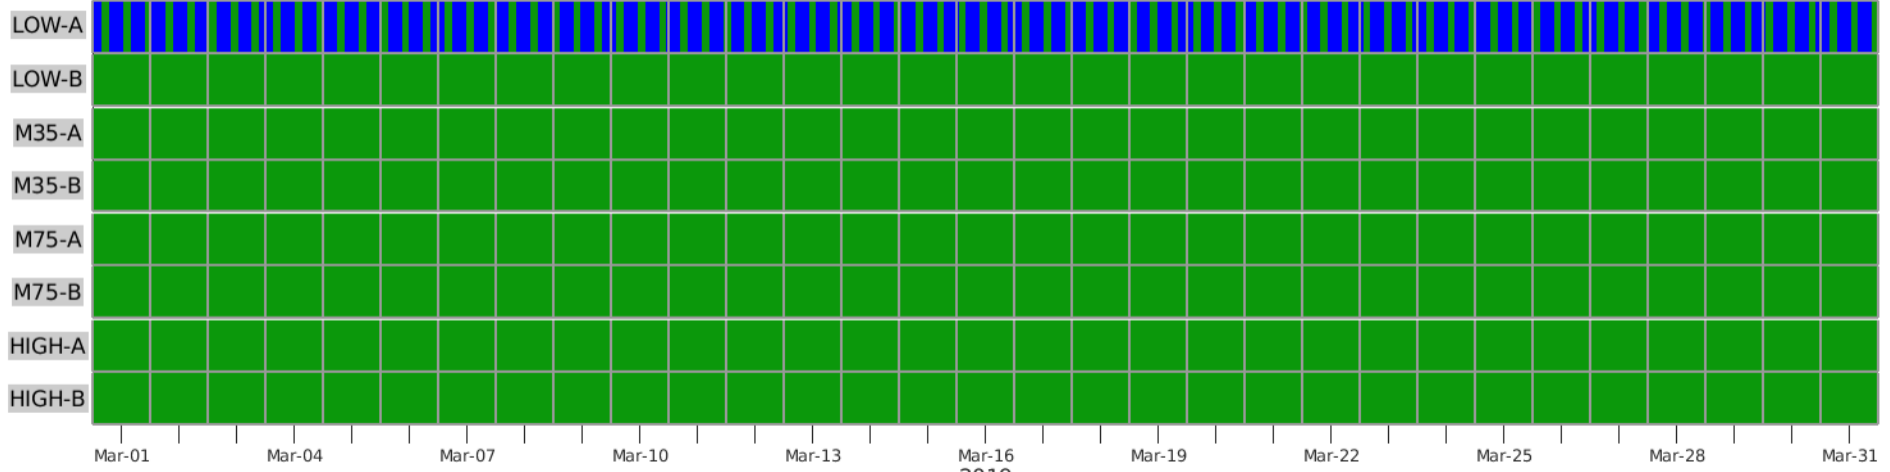





MagEIS Instrument Mode | Created on: 2021/10/21 | Green = Science | Blue = High-Rate | Red = Maintenance | White = Missing Data

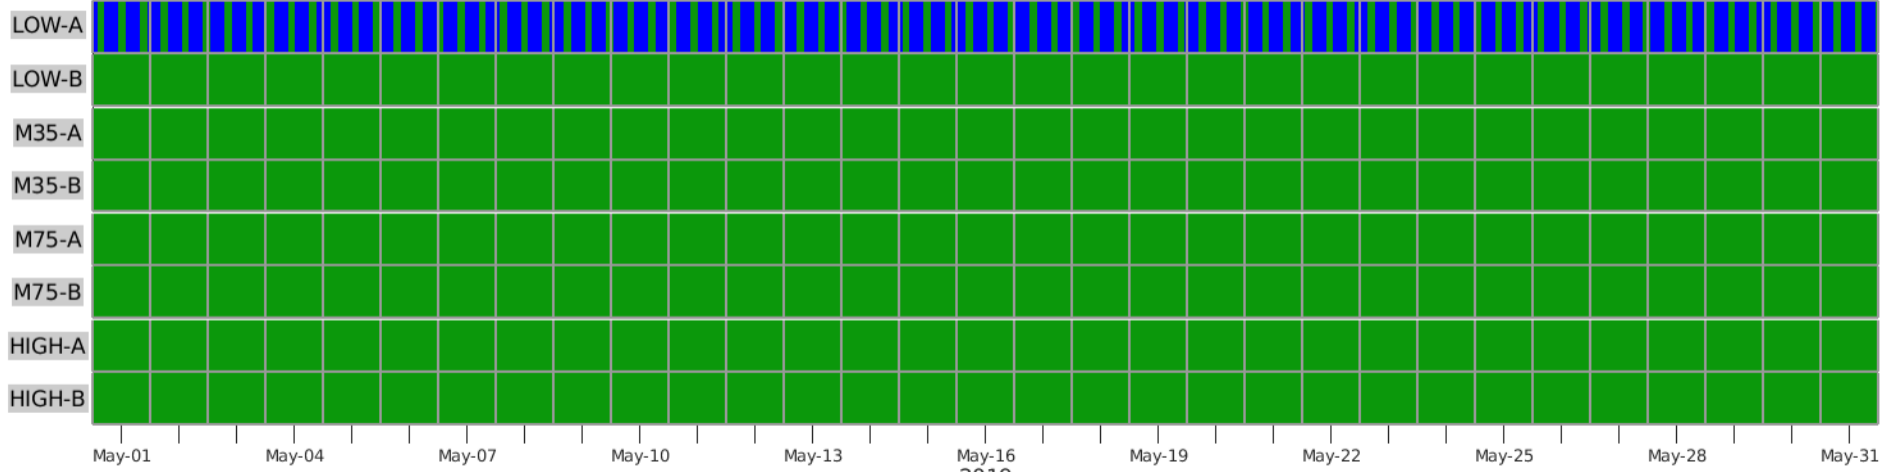

MagEIS Instrument Mode | Created on: 2021/10/21 | Green = Science | Blue = High-Rate | Red = Maintenance | White = Missing Data

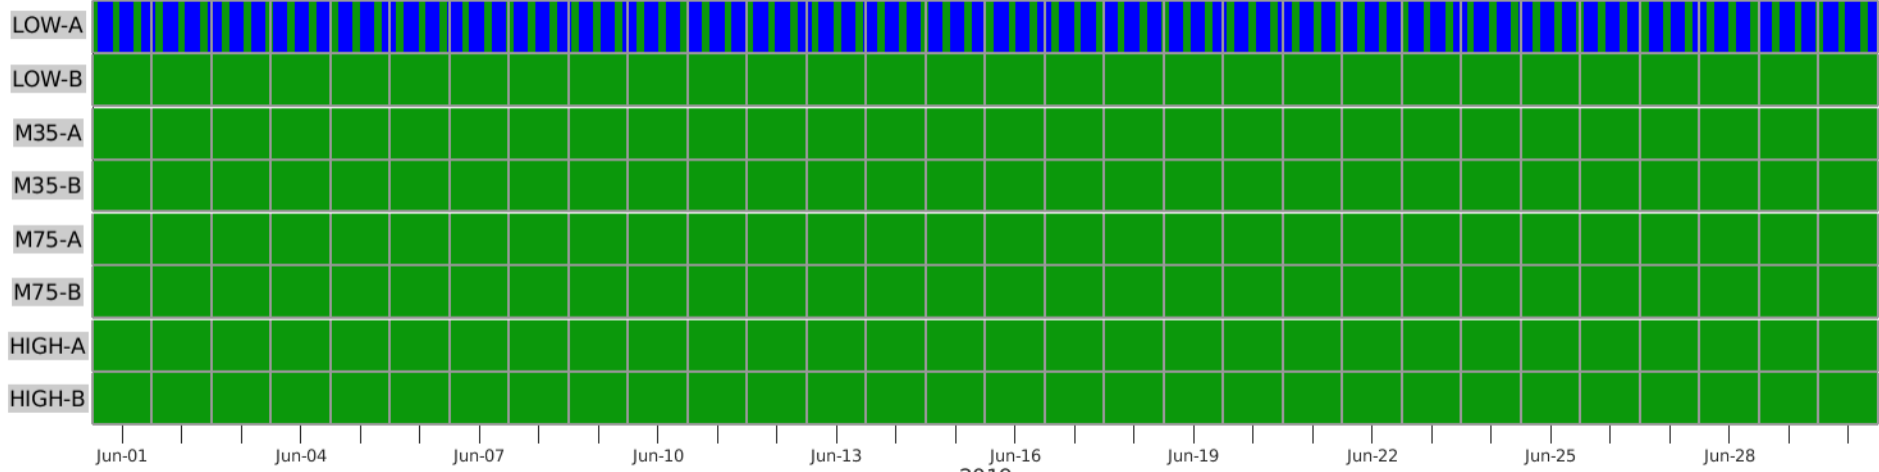





MagEIS Instrument Mode | Created on: 2021/10/21 | Green = Science | Blue = High-Rate | Red = Maintenance | White = Missing Data

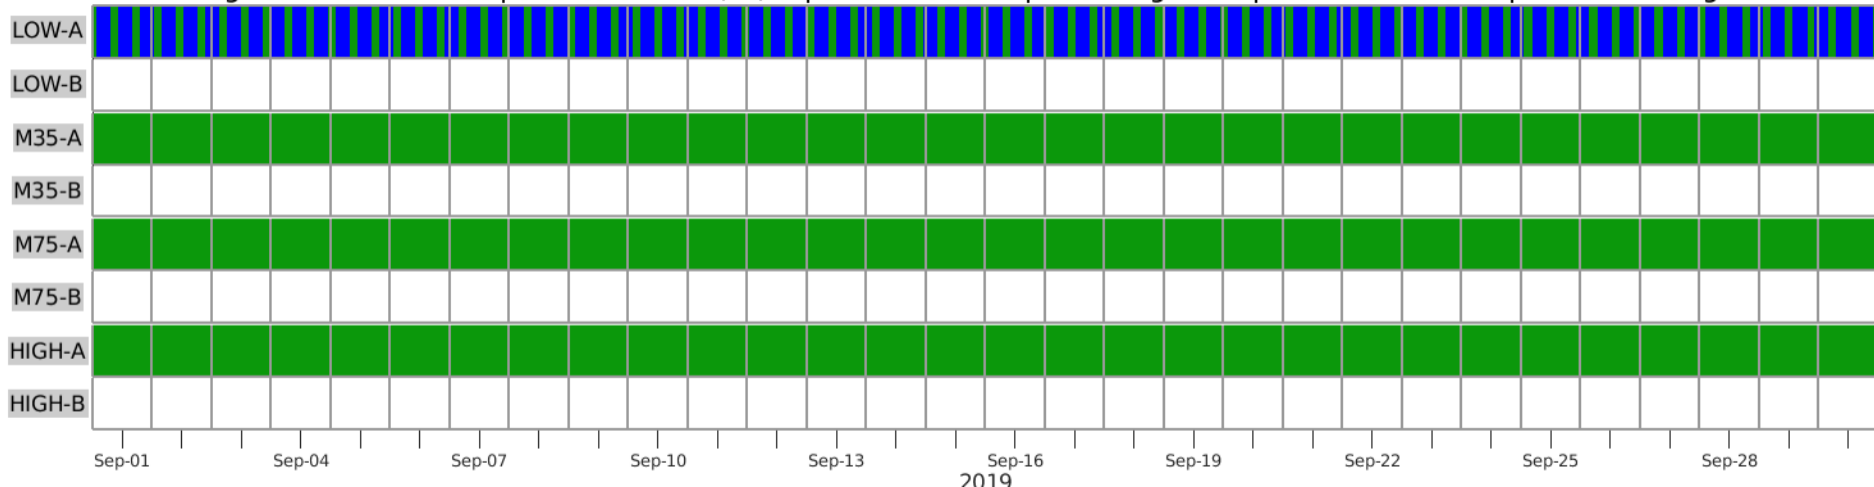

MagEIS Instrument Mode | Created on: 2021/10/21 | Green = Science | Blue = High-Rate | Red = Maintenance | White = Missing Data

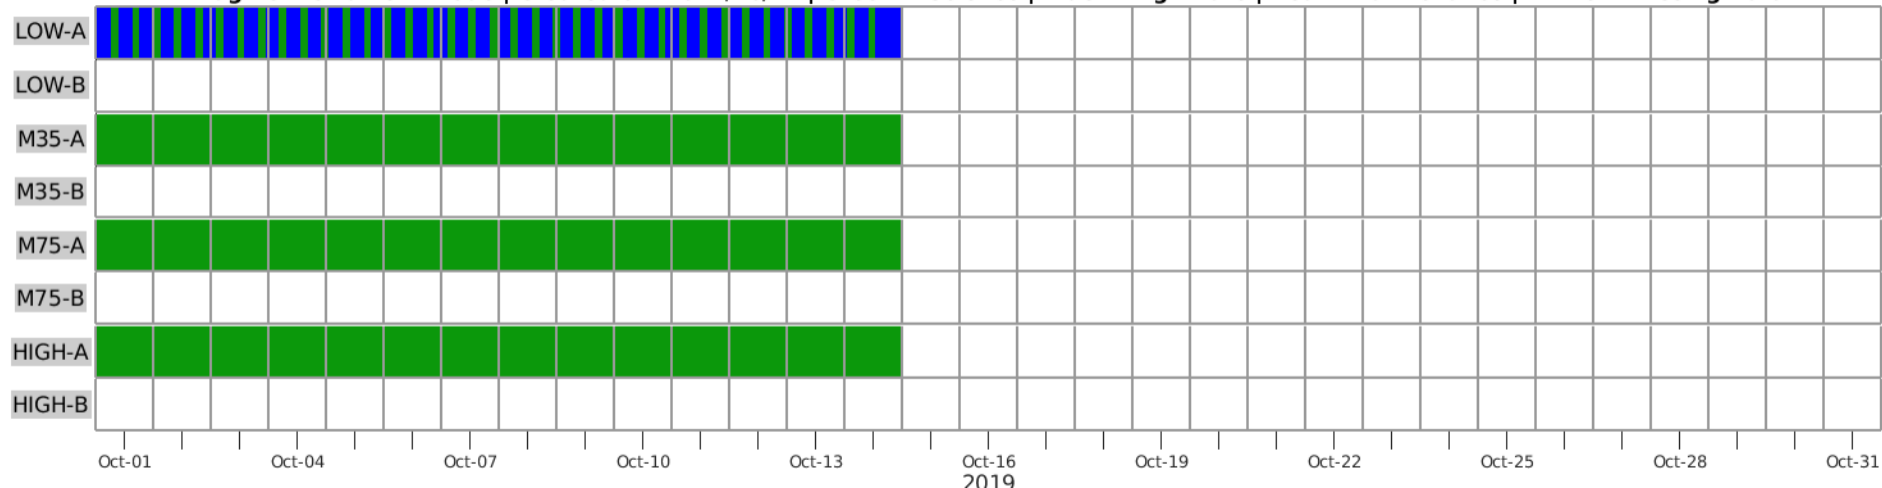

Supplement: 11214_2021_855_MOESM6_ESM.pdf [file 11214_2021_855_MOESM6_ESM.pdf]
