# Supplementary material for: The Magnetic Electron Ion Spectrometer: A Review of On-Orbit Sensor Performance, Data, Operations, and Science
Source: PubMed Central journal article supplement (PMC8553741; doi:10.1007/s11214-021-00855-2), 2021-10-28

## Note:

At the time of publication, the “MERGE-A-hg” and “MERGE-B-hg” level 3 files had not yet been created. Thus, they are shown as red (file does not exist) in this document. It is anticipated that they will be created eventually, at which time they will become part of the final MagEIS data archive.

MagEIS Data Files | Created on: 2021/10/21 | Green = File Exists | Red = File Does Not Exist

sp=spin-based (science) | ns=non-science (housekeeping & status) | hr=highrate (LOW/MED only) | hg=histogram | de=direct event (HIGH only)

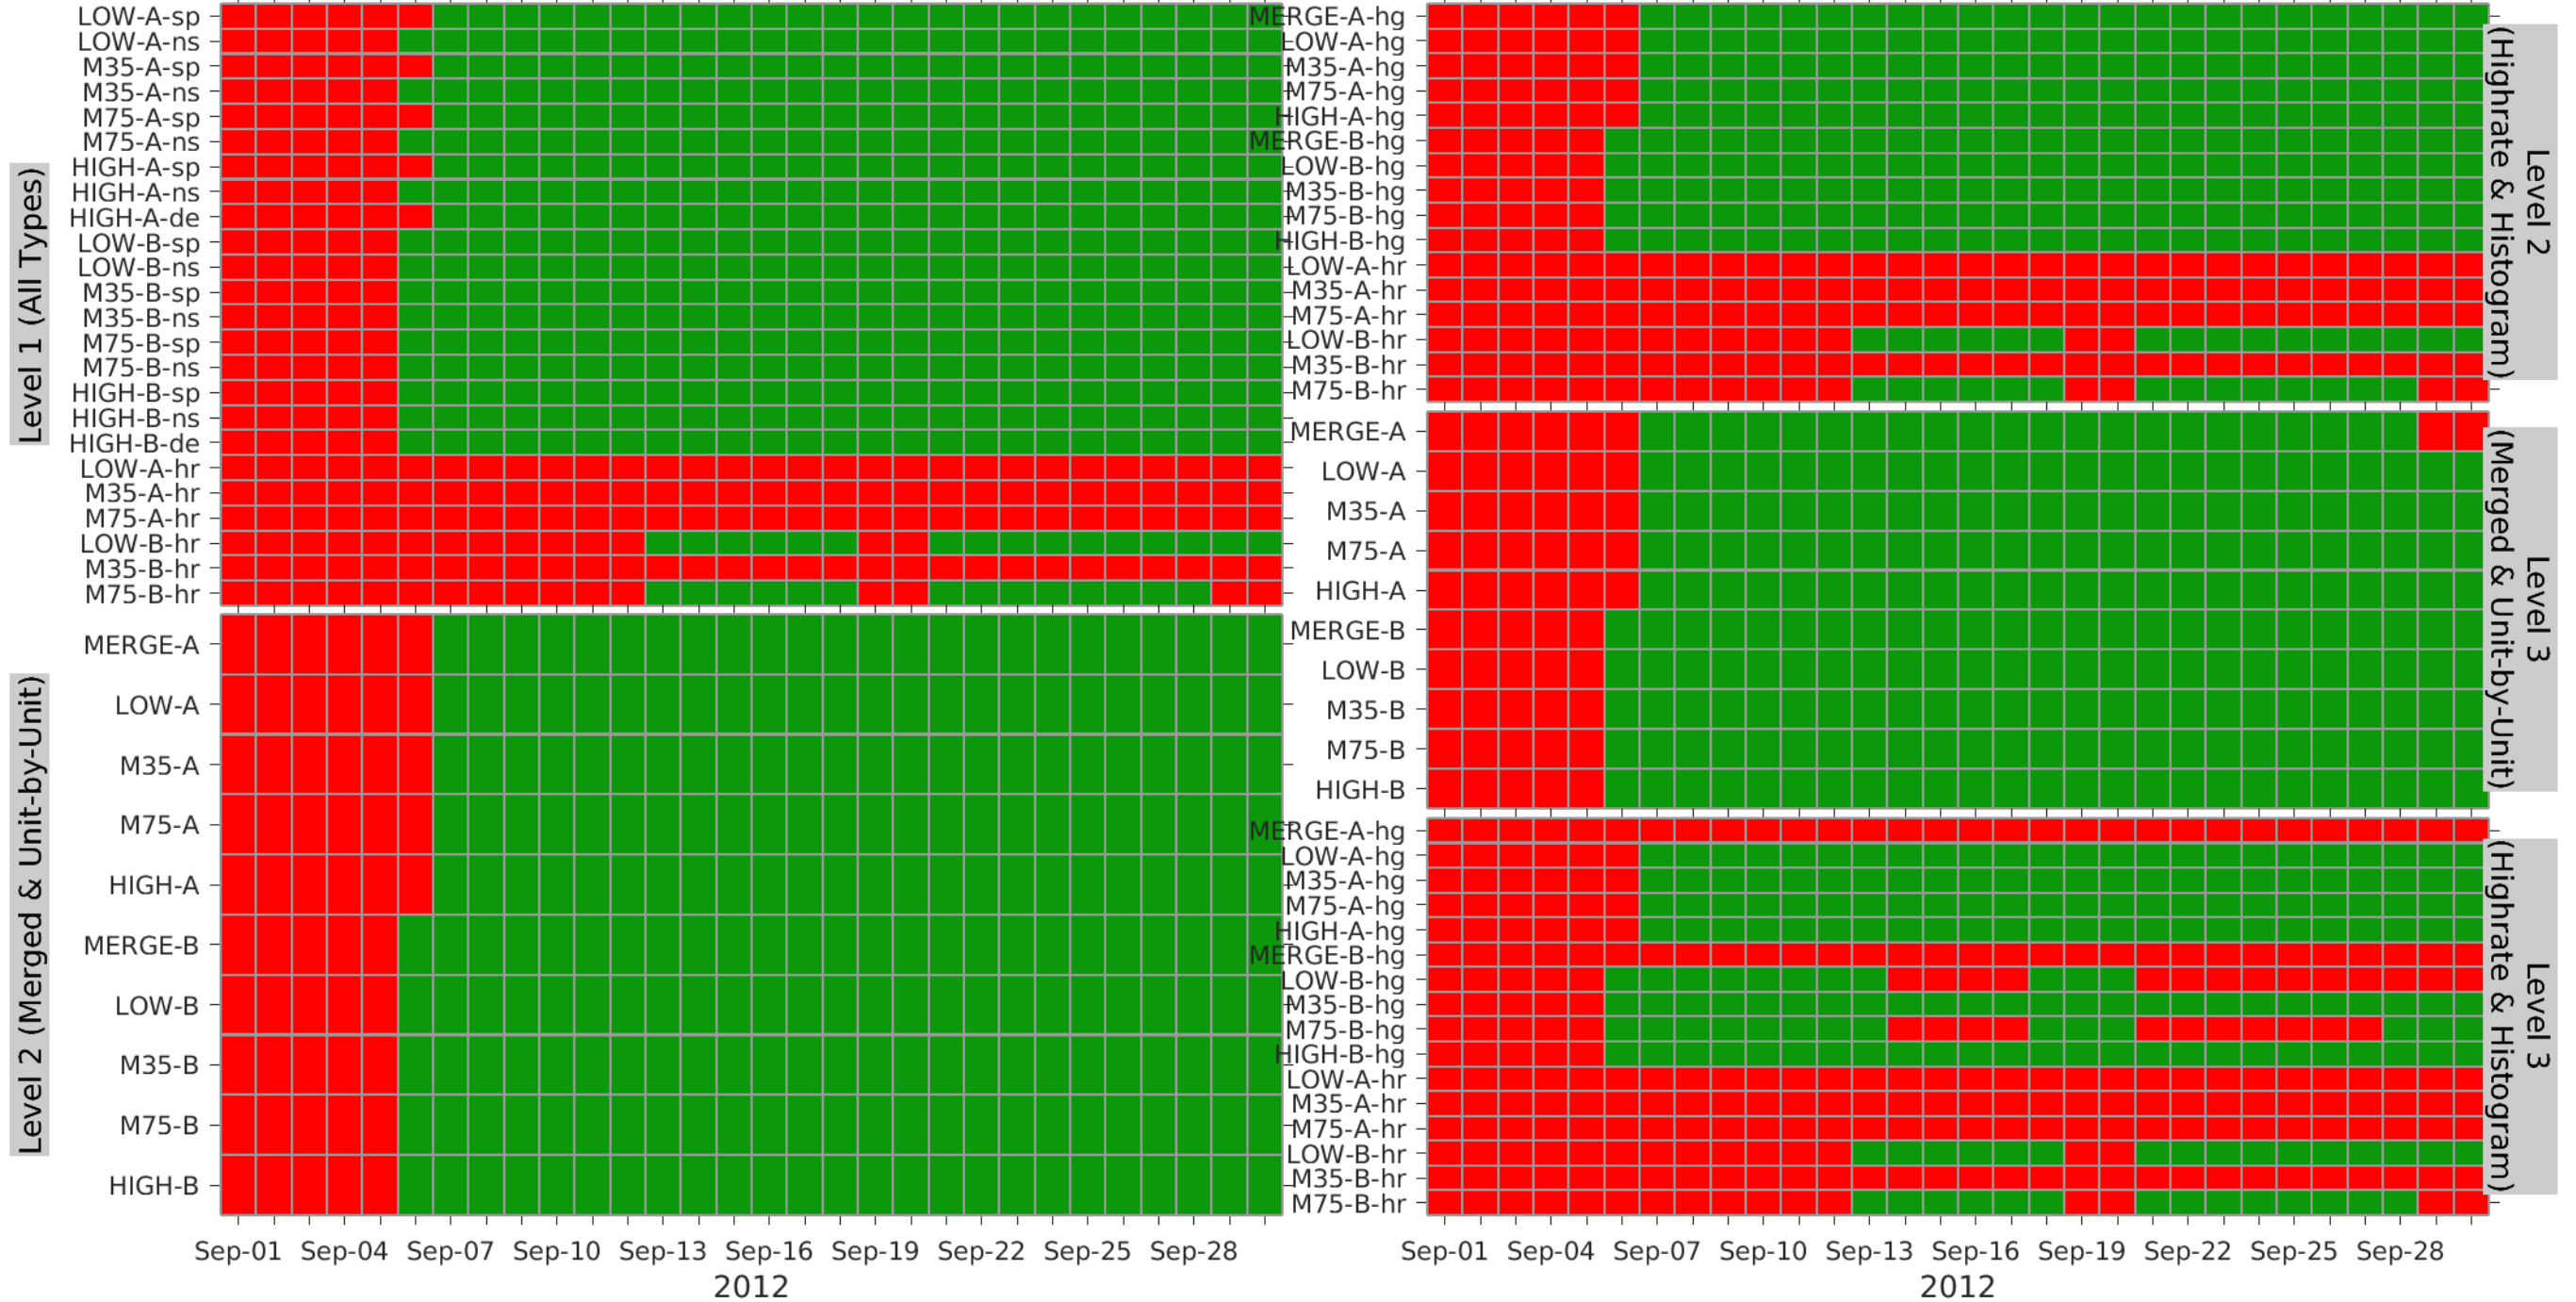

MagEIS Data Files | Created on: 2021/10/21 | Green = File Exists | Red = File Does Not Exist

sp=spin-based (science) | ns=non-science (housekeeping & status) | hr=highrate (LOW/MED only) | hg=histogram | de=direct event (HIGH only)

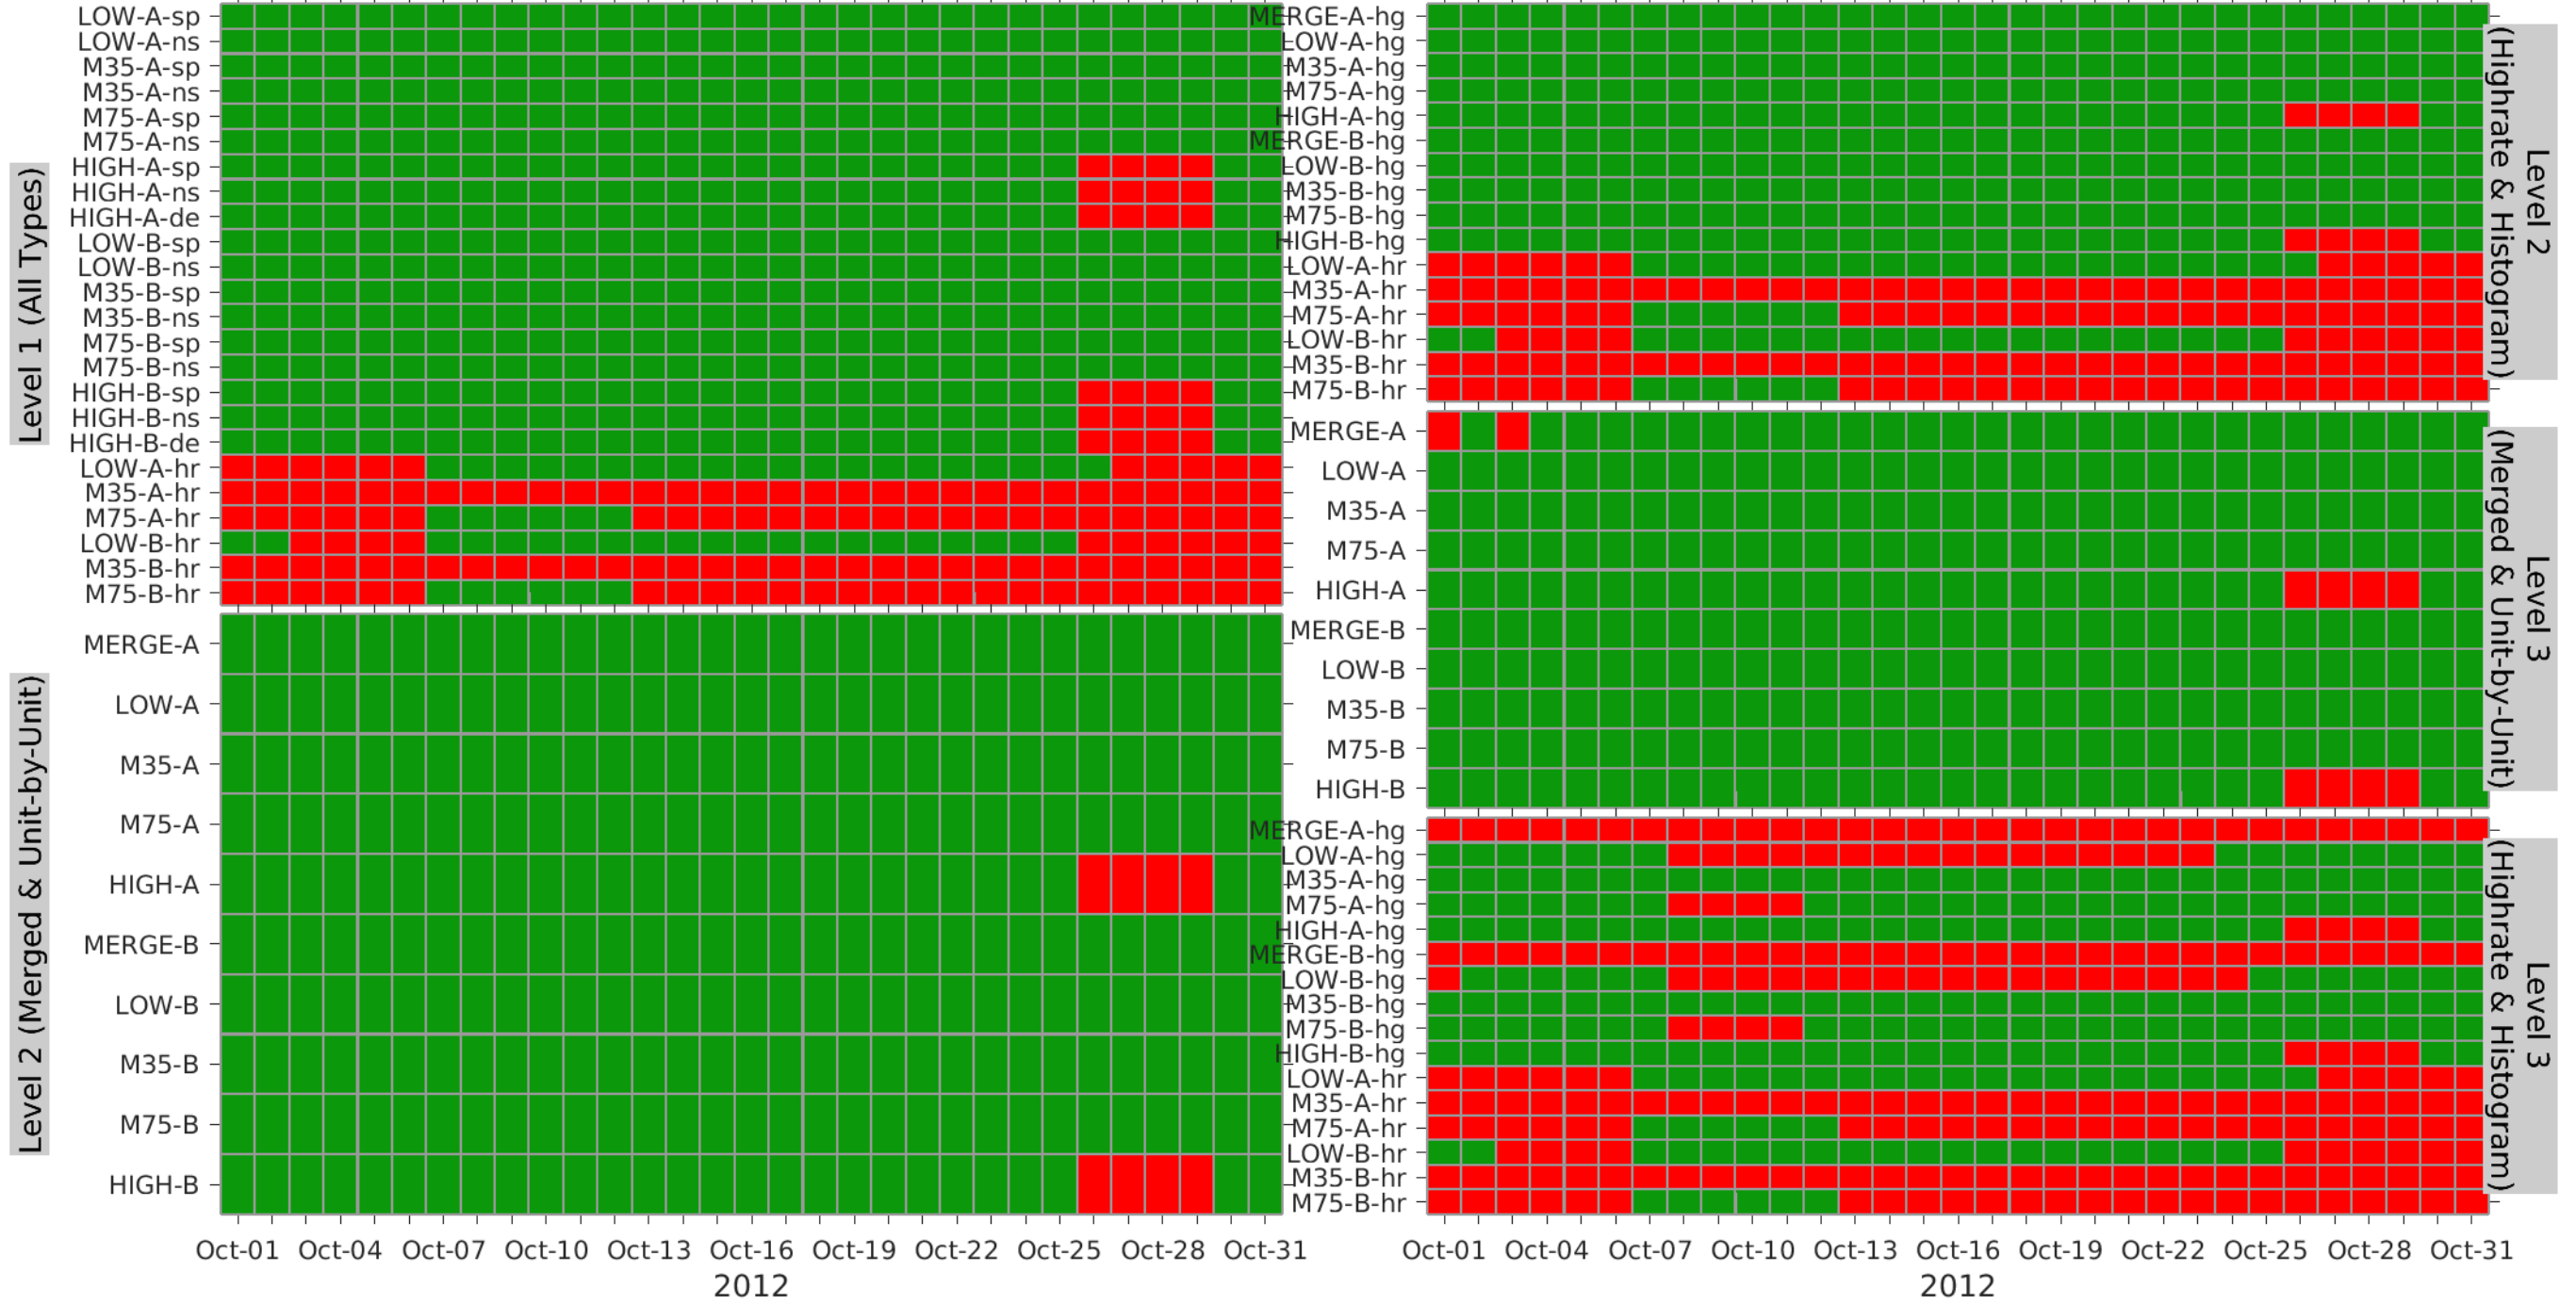

MagEIS Data Files | Created on: 2021/10/21 | Green = File Exists | Red = File Does Not Exist

sp=spin-based (science) | ns=non-science (housekeeping & status) | hr=highrate (LOW/MED only) | hg=histogram | de=direct event (HIGH only)

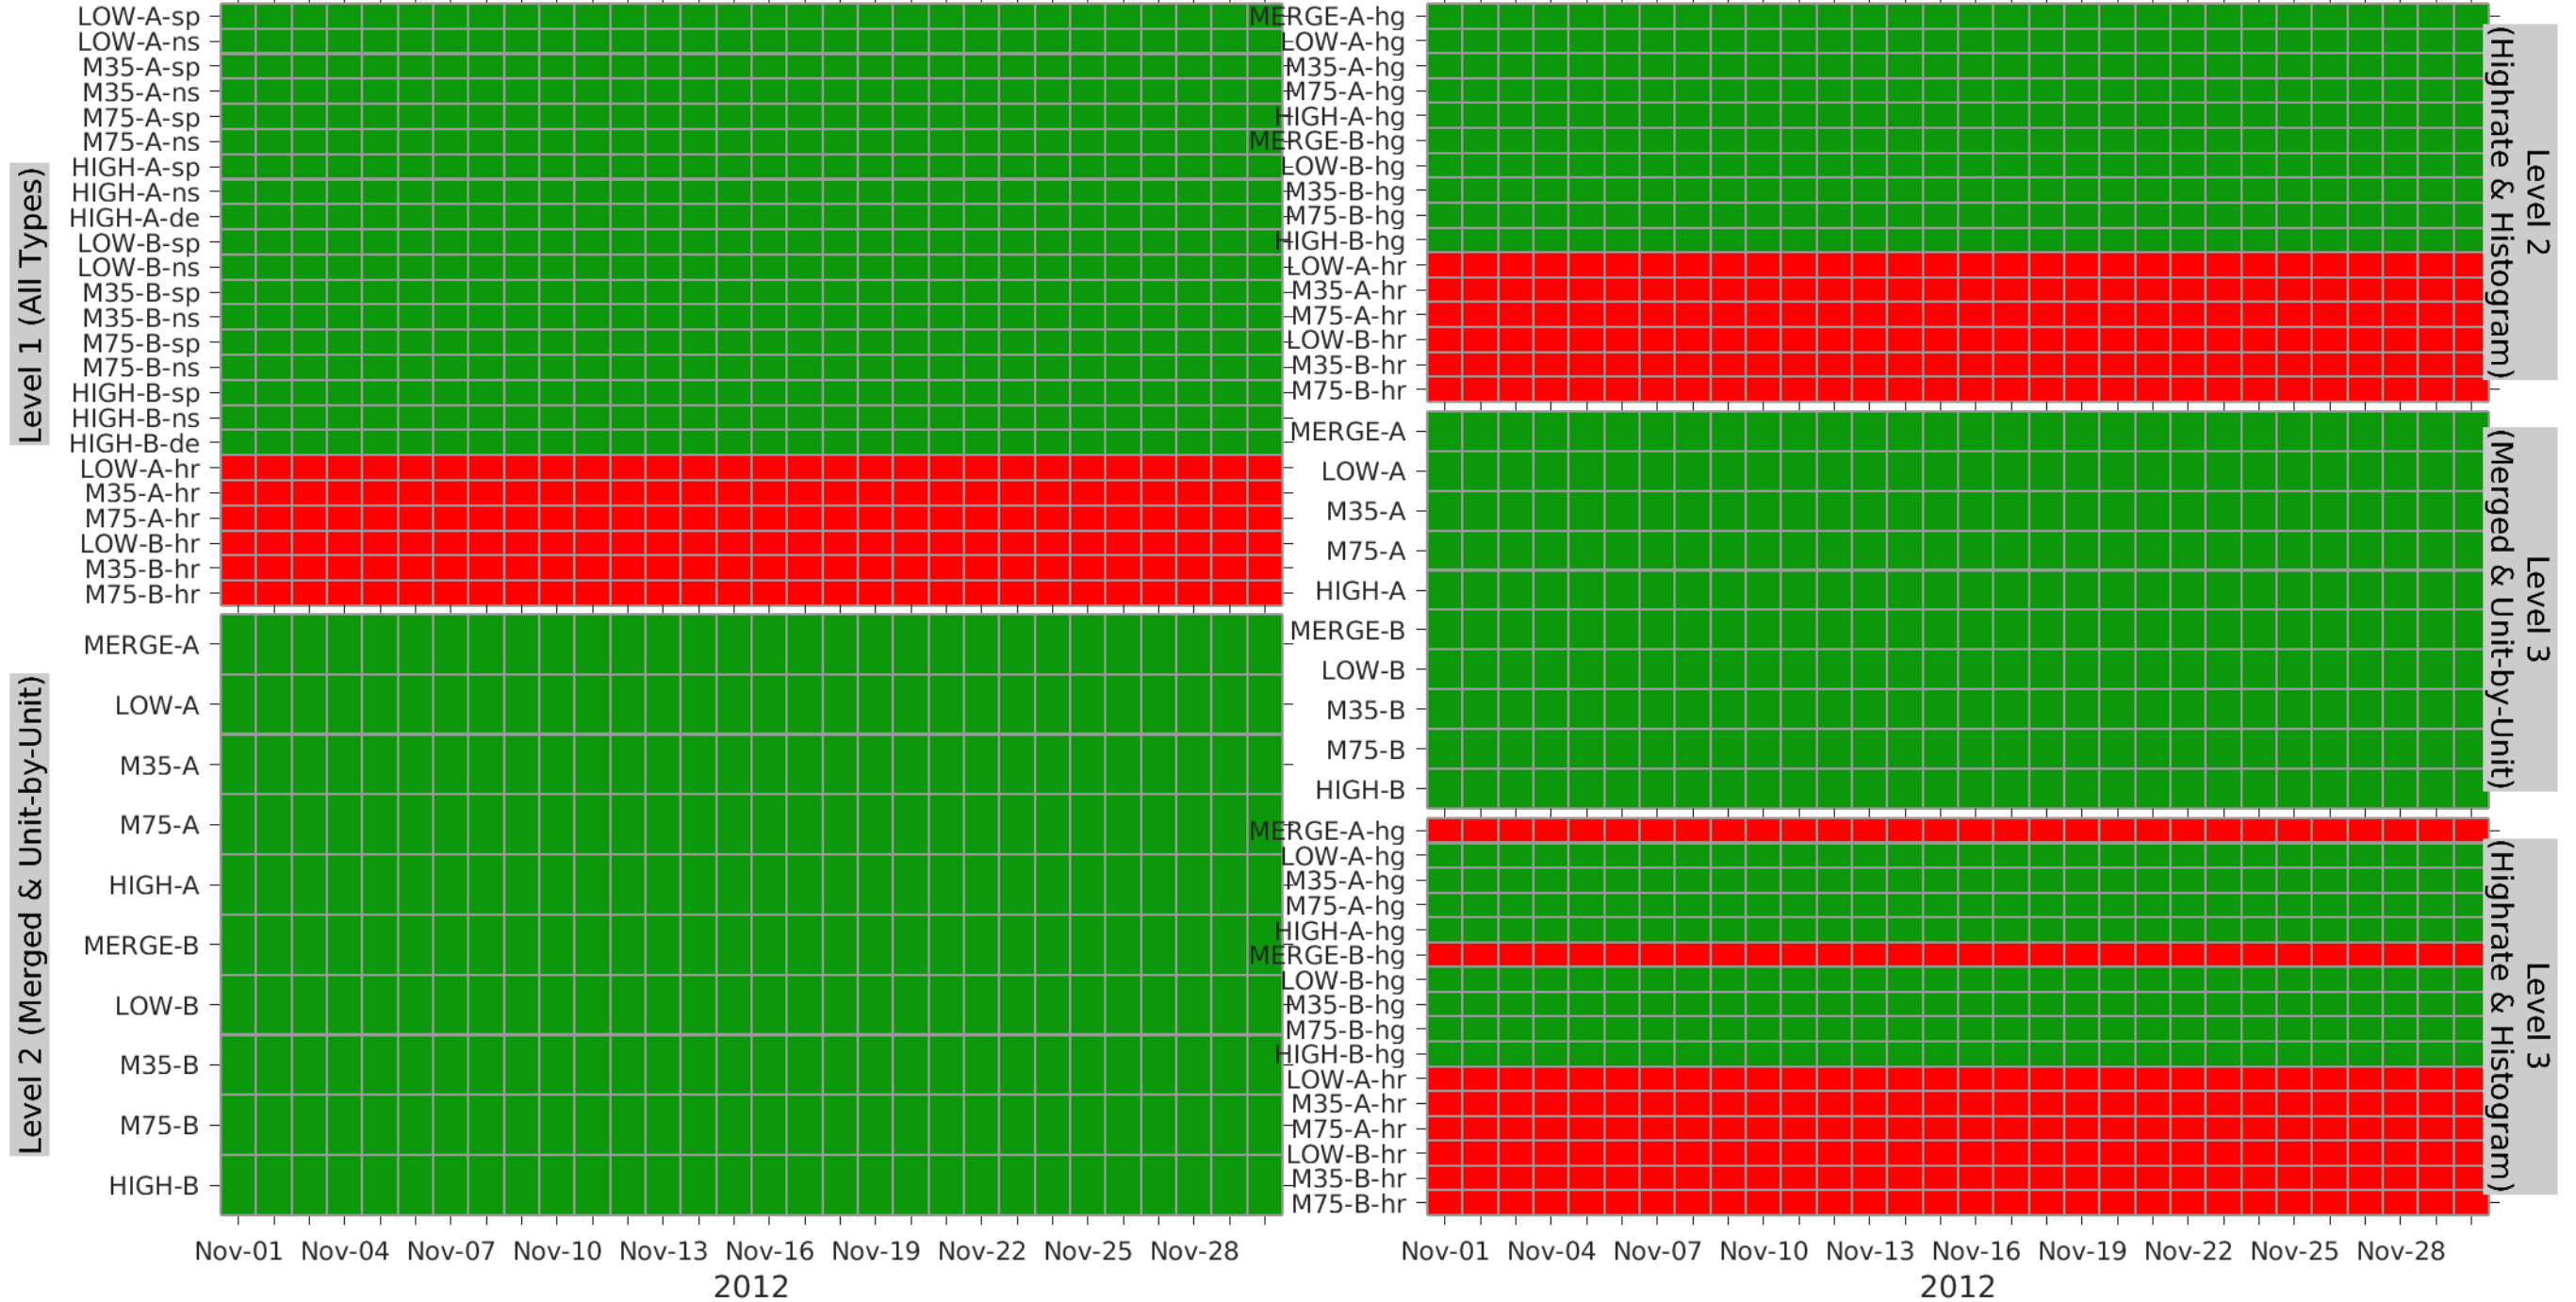

MagEIS Data Files | Created on: 2021/10/21 | Green = File Exists | Red = File Does Not Exist

sp=spin-based (science) | ns=non-science (housekeeping & status) | hr=highrate (LOW/MED only) | hg=histogram | de=direct event (HIGH only)

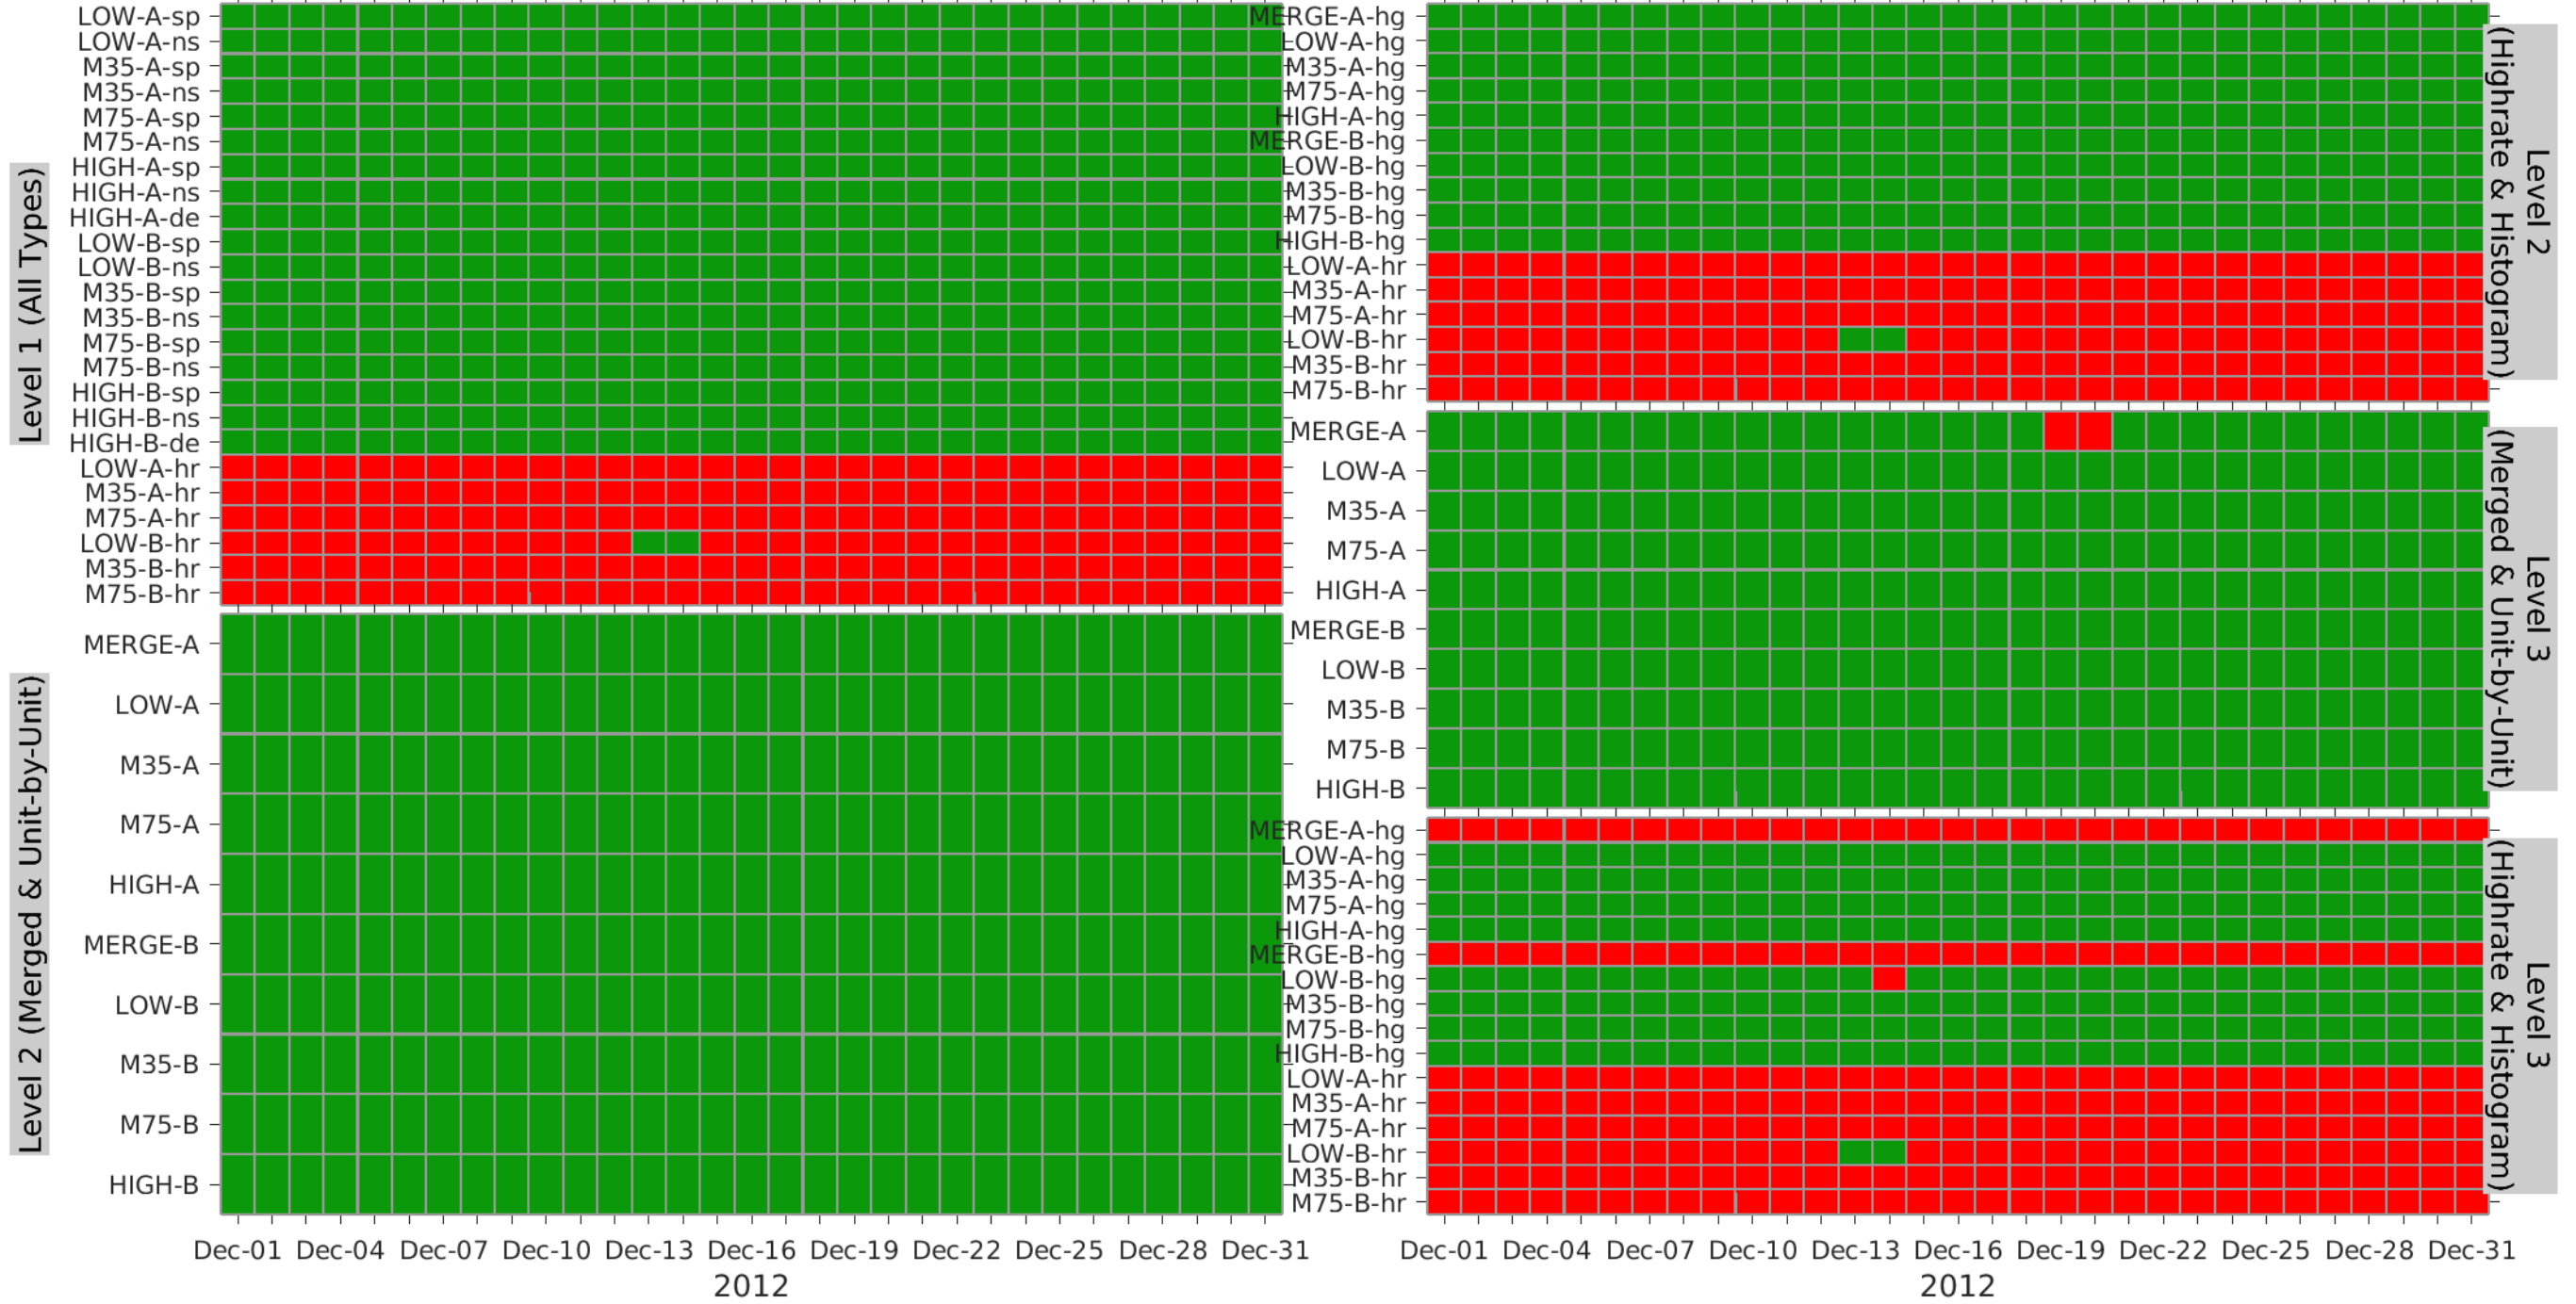

MagEIS Data Files | Created on: 2021/10/21 | Green = File Exists | Red = File Does Not Exist

sp=spin-based (science) | ns=non-science (housekeeping & status) | hr=highrate (LOW/MED only) | hg=histogram | de=direct event (HIGH only)

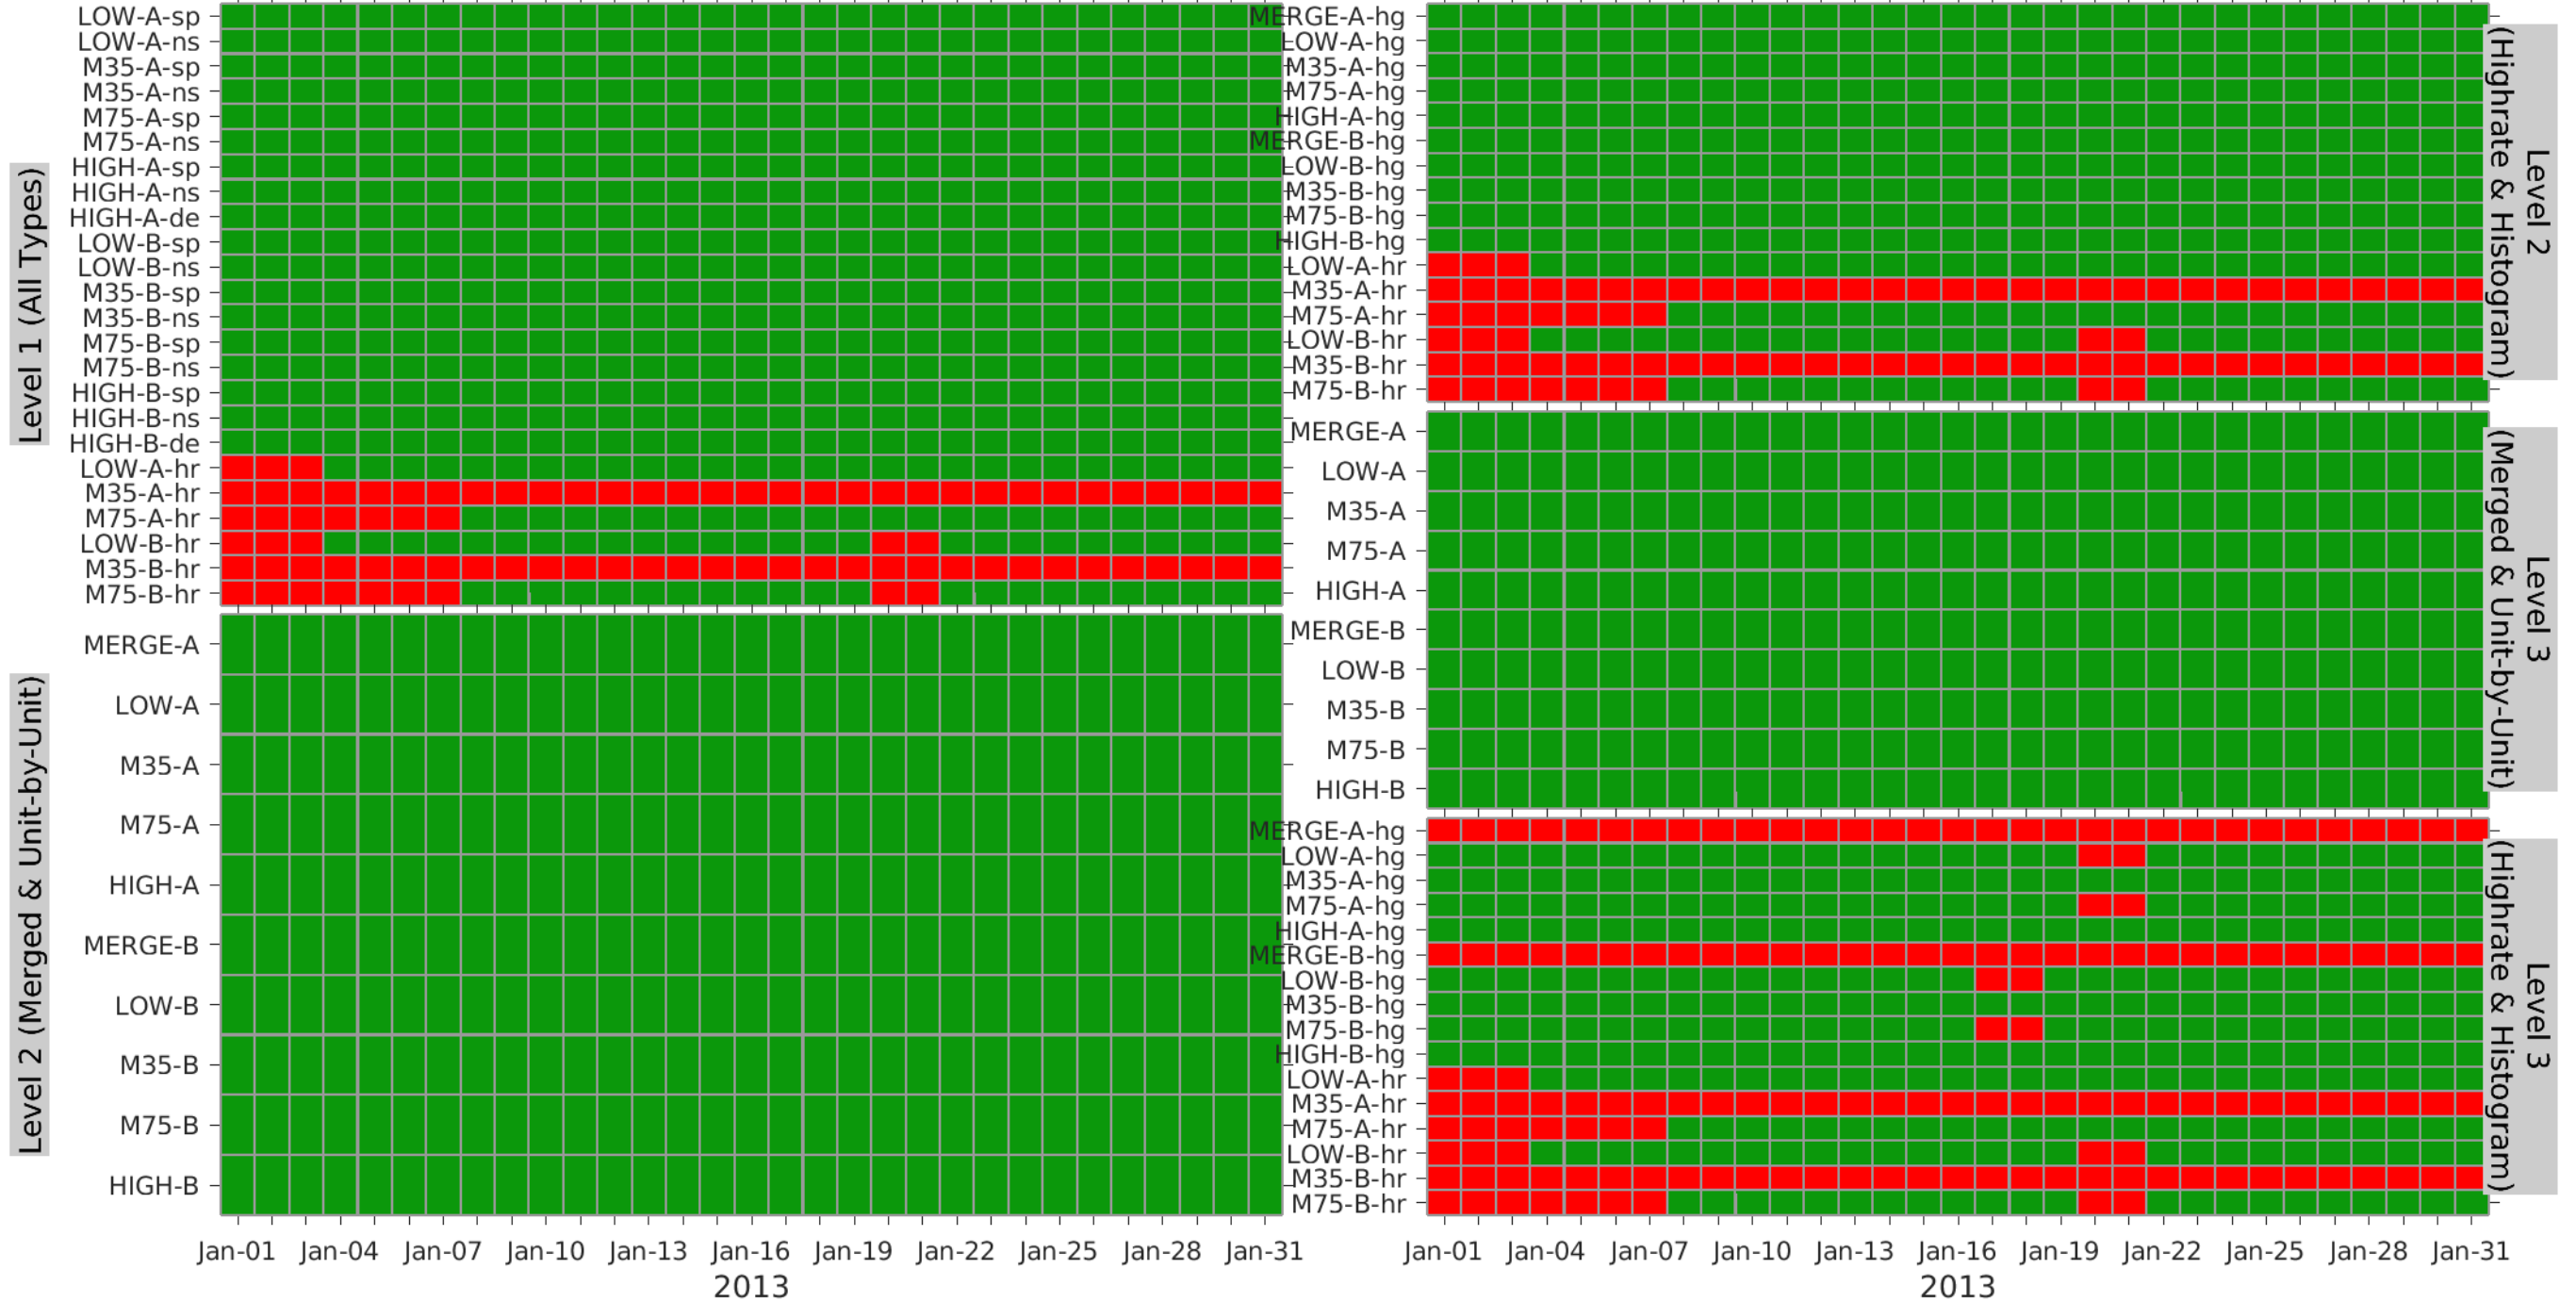

MagEIS Data Files | Created on: 2021/10/21 | Green = File Exists | Red = File Does Not Exist

sp=spin-based (science) | ns=non-science (housekeeping & status) | hr=highrate (LOW/MED only) | hg=histogram | de=direct event (HIGH only)

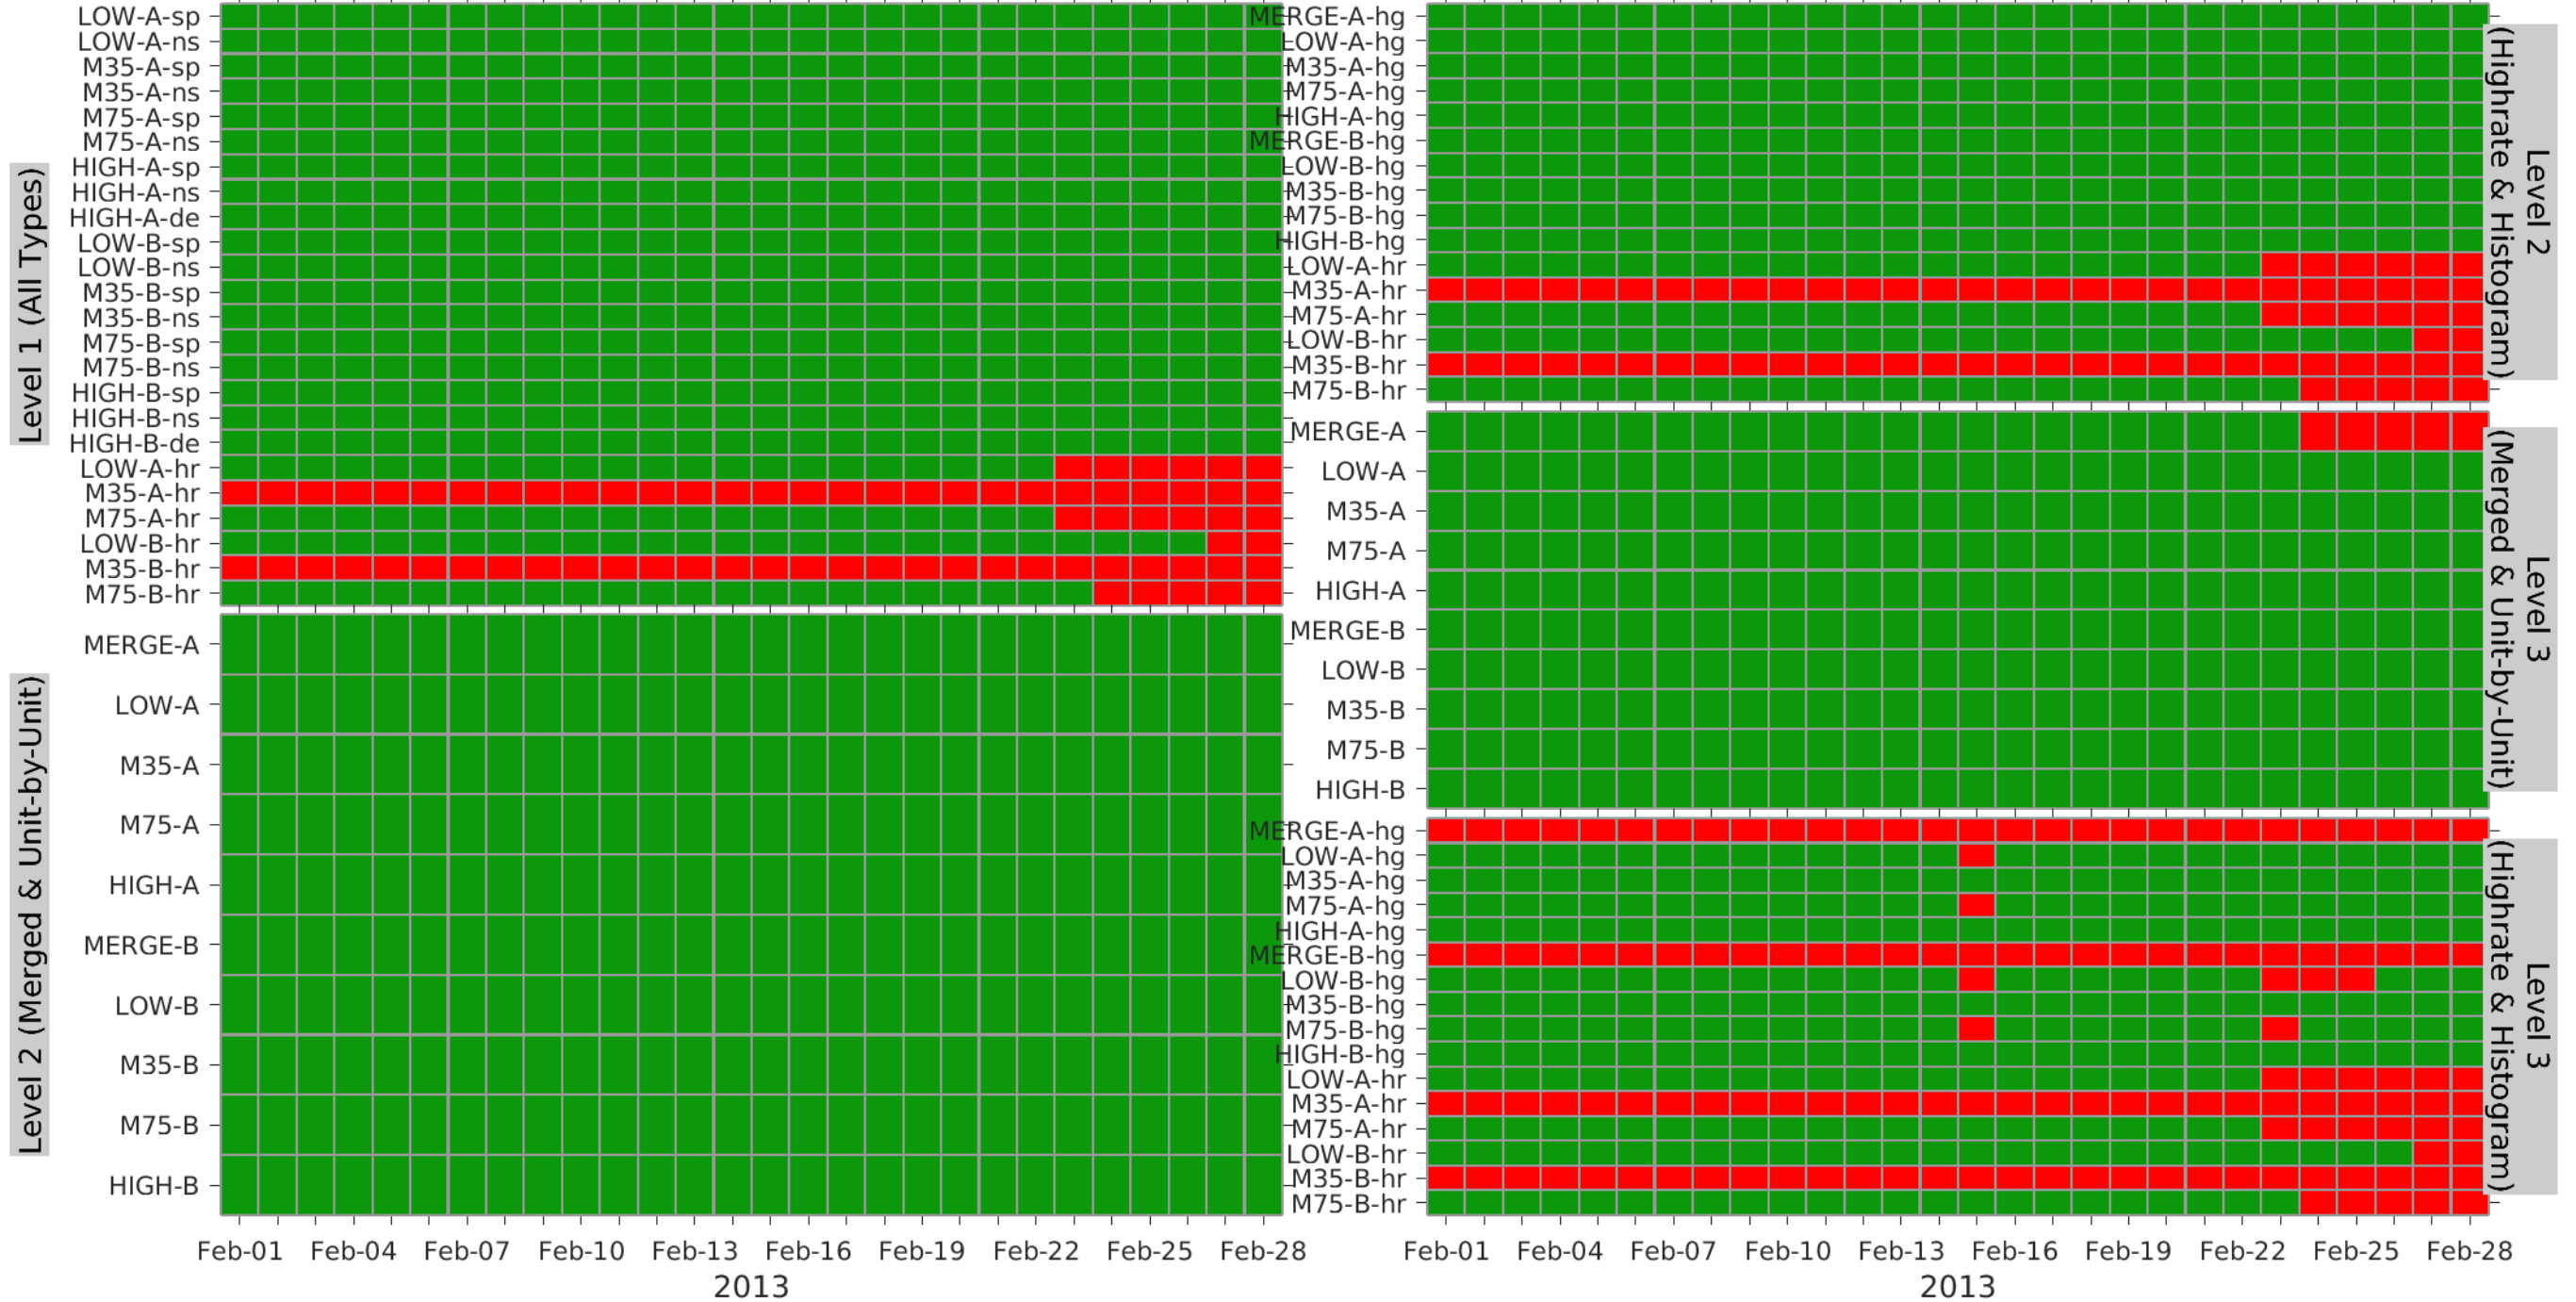

MagEIS Data Files | Created on: 2021/10/21 | Green = File Exists | Red = File Does Not Exist

sp=spin-based (science) | ns=non-science (housekeeping & status) | hr=highrate (LOW/MED only) | hg=histogram | de=direct event (HIGH only)

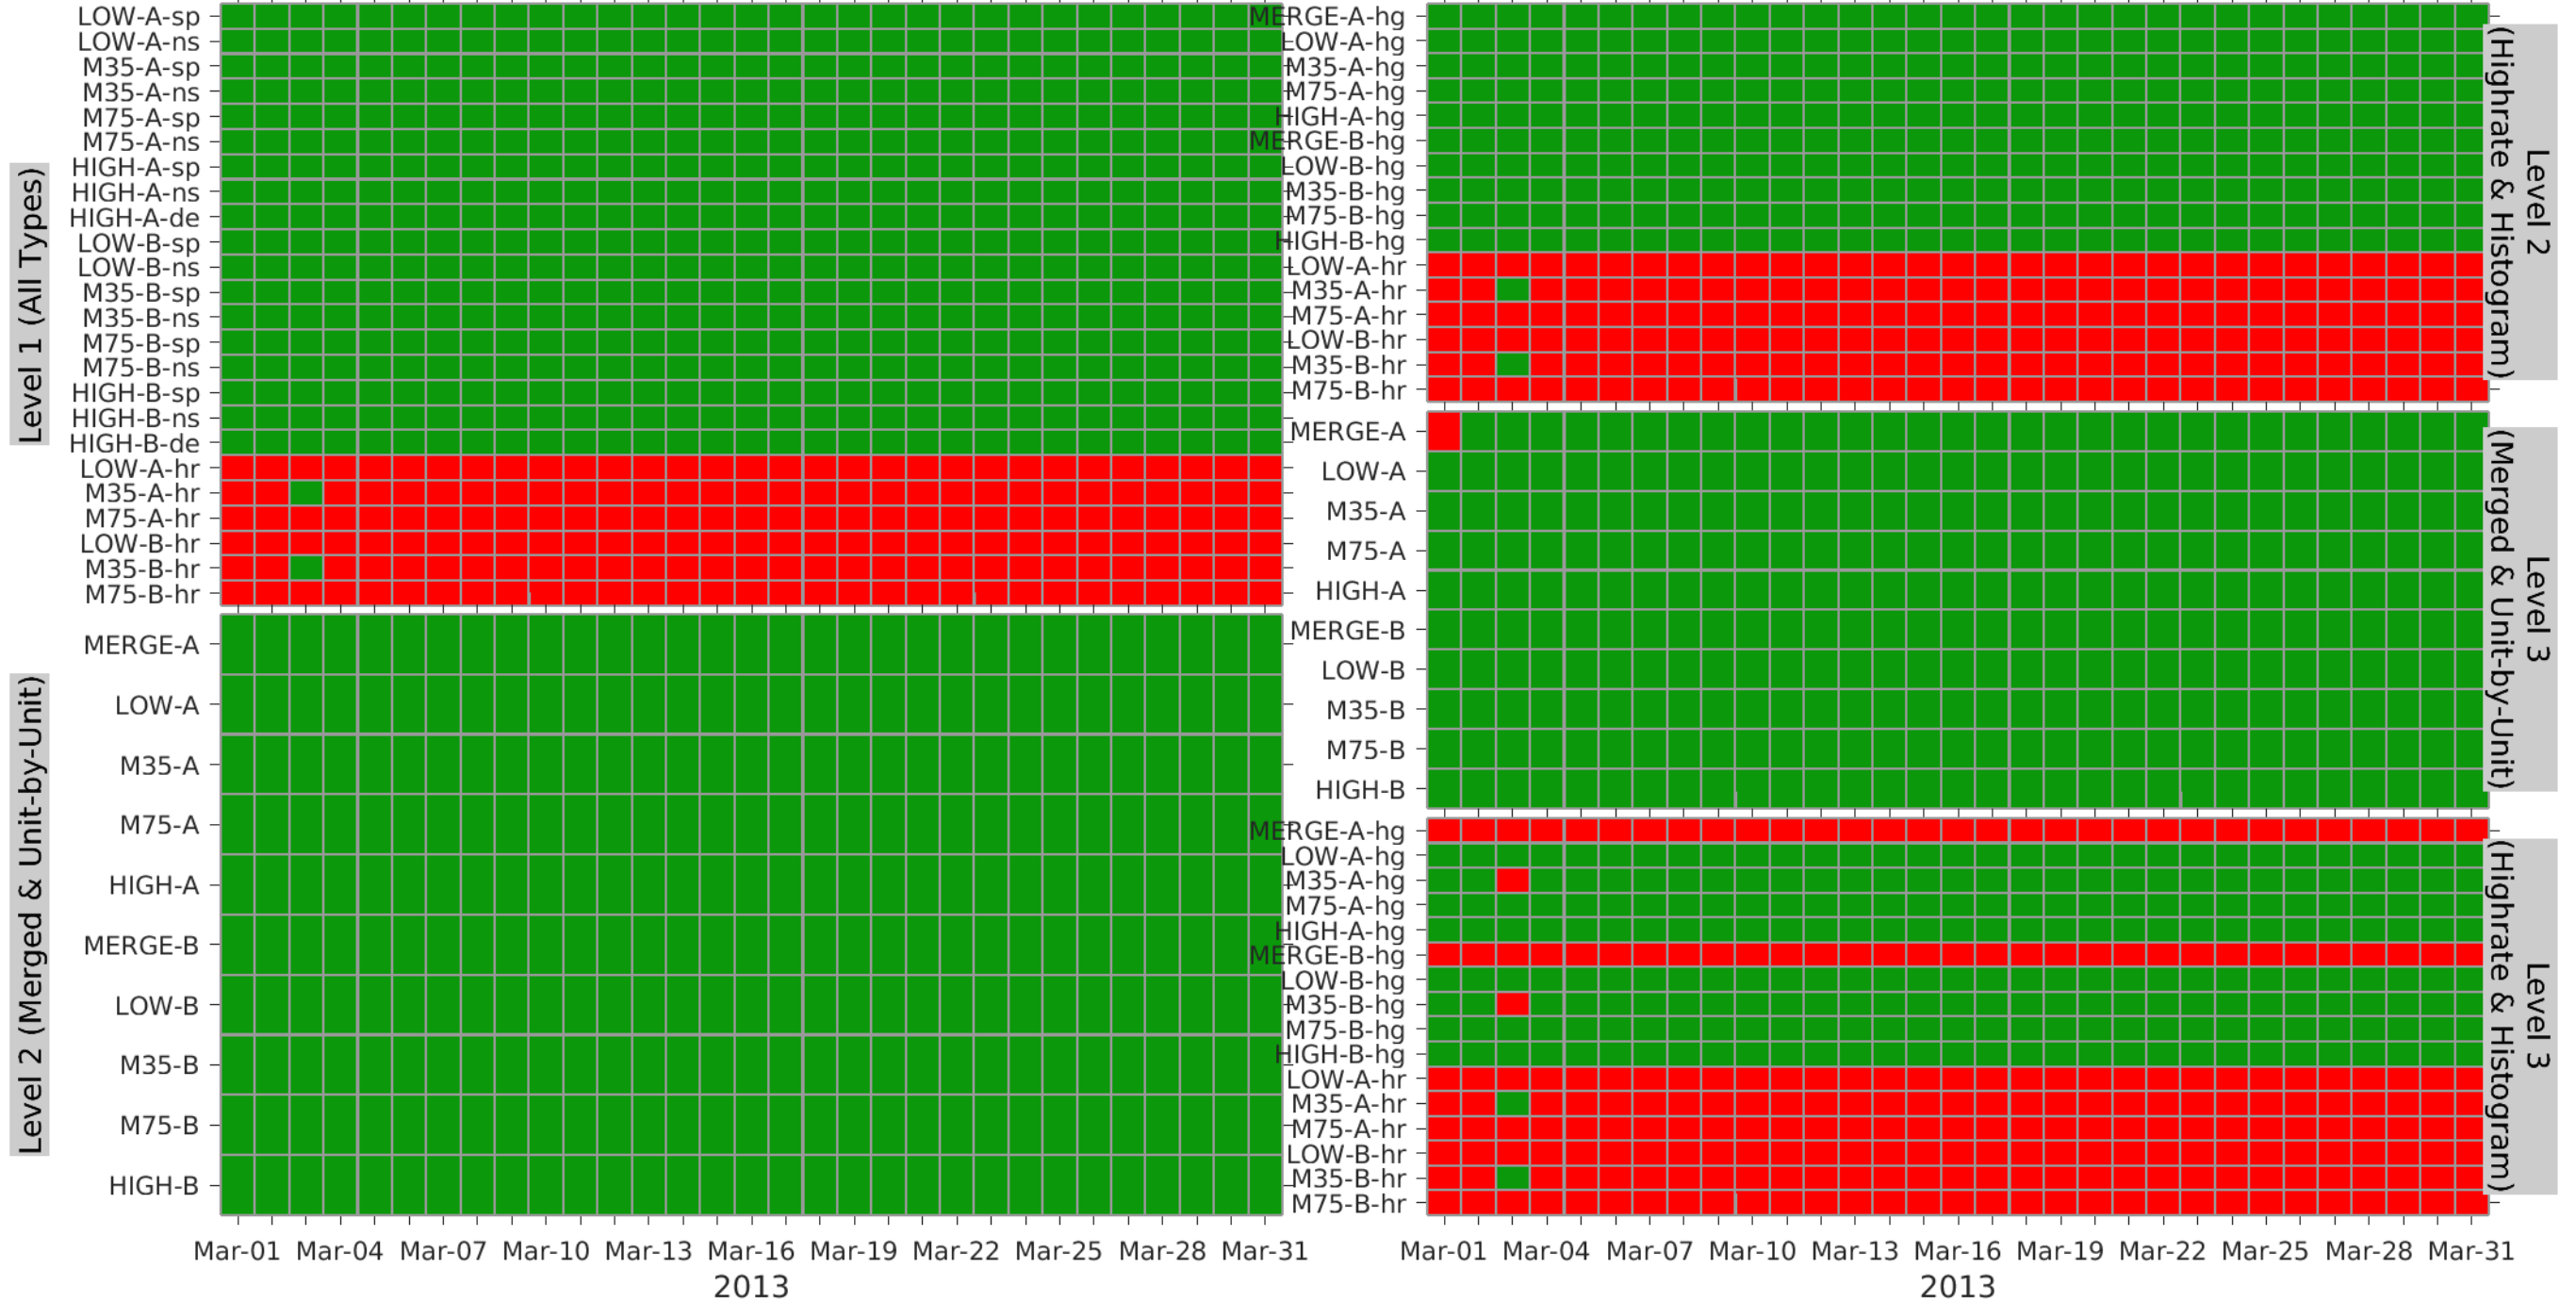



MagEIS Data Files | Created on: 2021/10/21 | Green = File Exists | Red = File Does Not Exist

sp=spin-based (science) | ns=non-science (housekeeping & status) | hr=highrate (LOW/MED only) | hg=histogram | de=direct event (HIGH only)

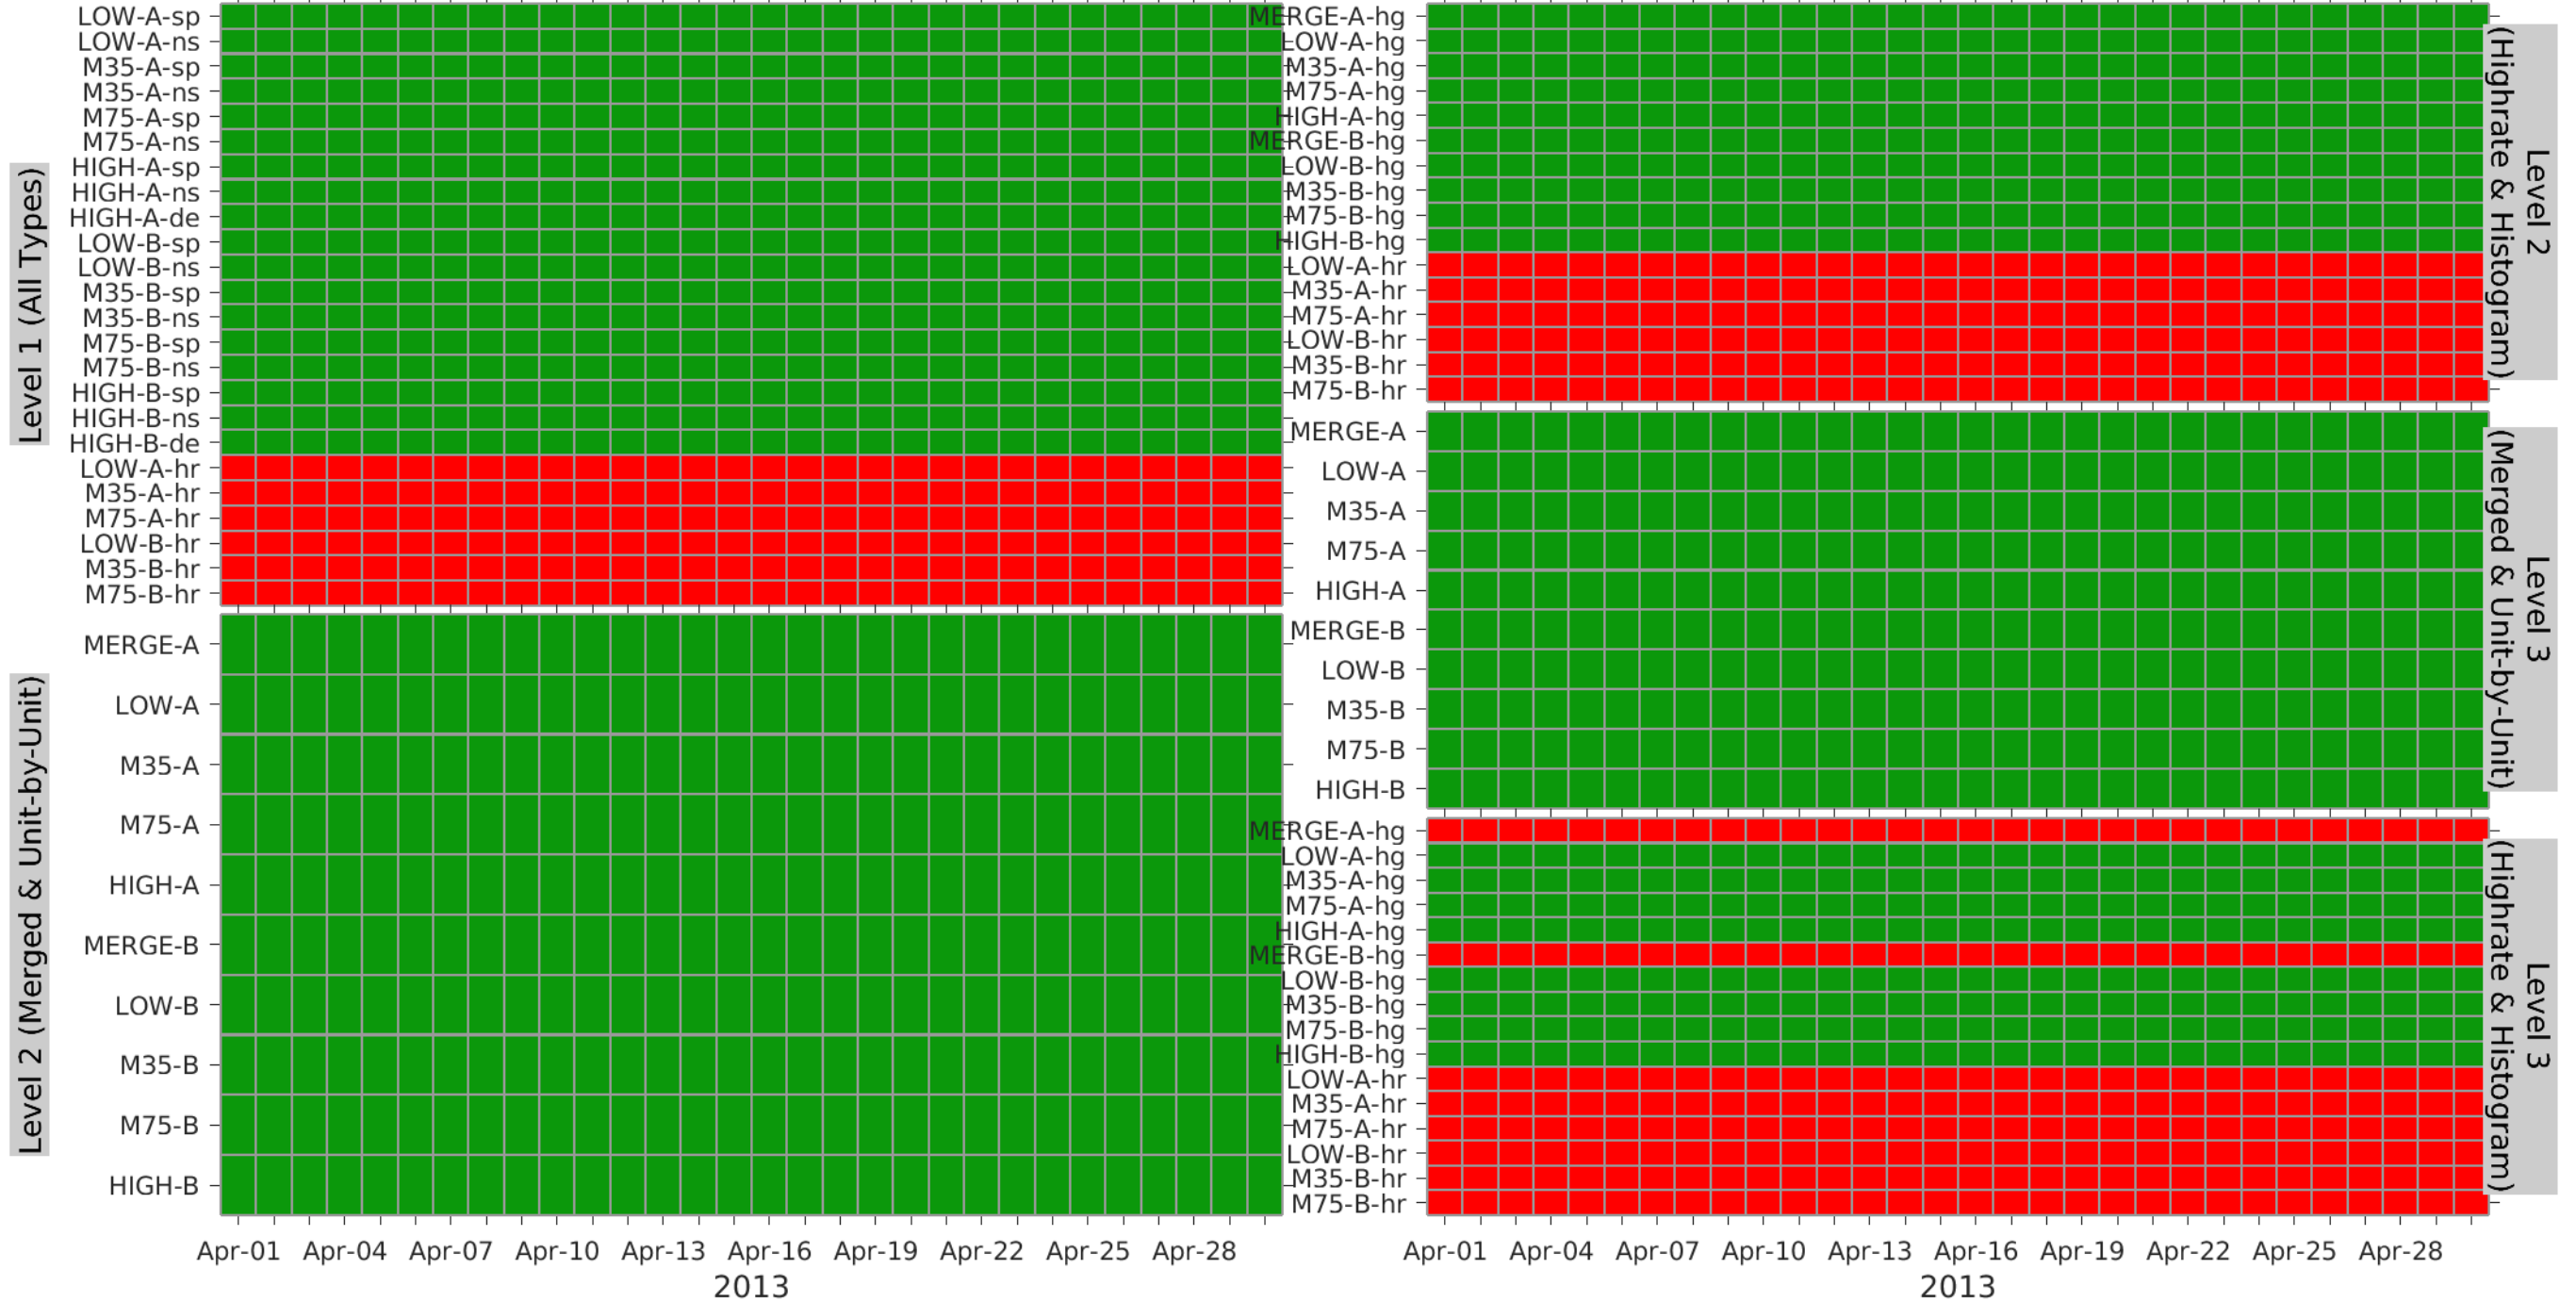

MagEIS Data Files | Created on: 2021/10/21 | Green = File Exists | Red = File Does Not Exist

sp=spin-based (science) | ns=non-science (housekeeping & status) | hr=highrate (LOW/MED only) | hg=histogram | de=direct event (HIGH only)

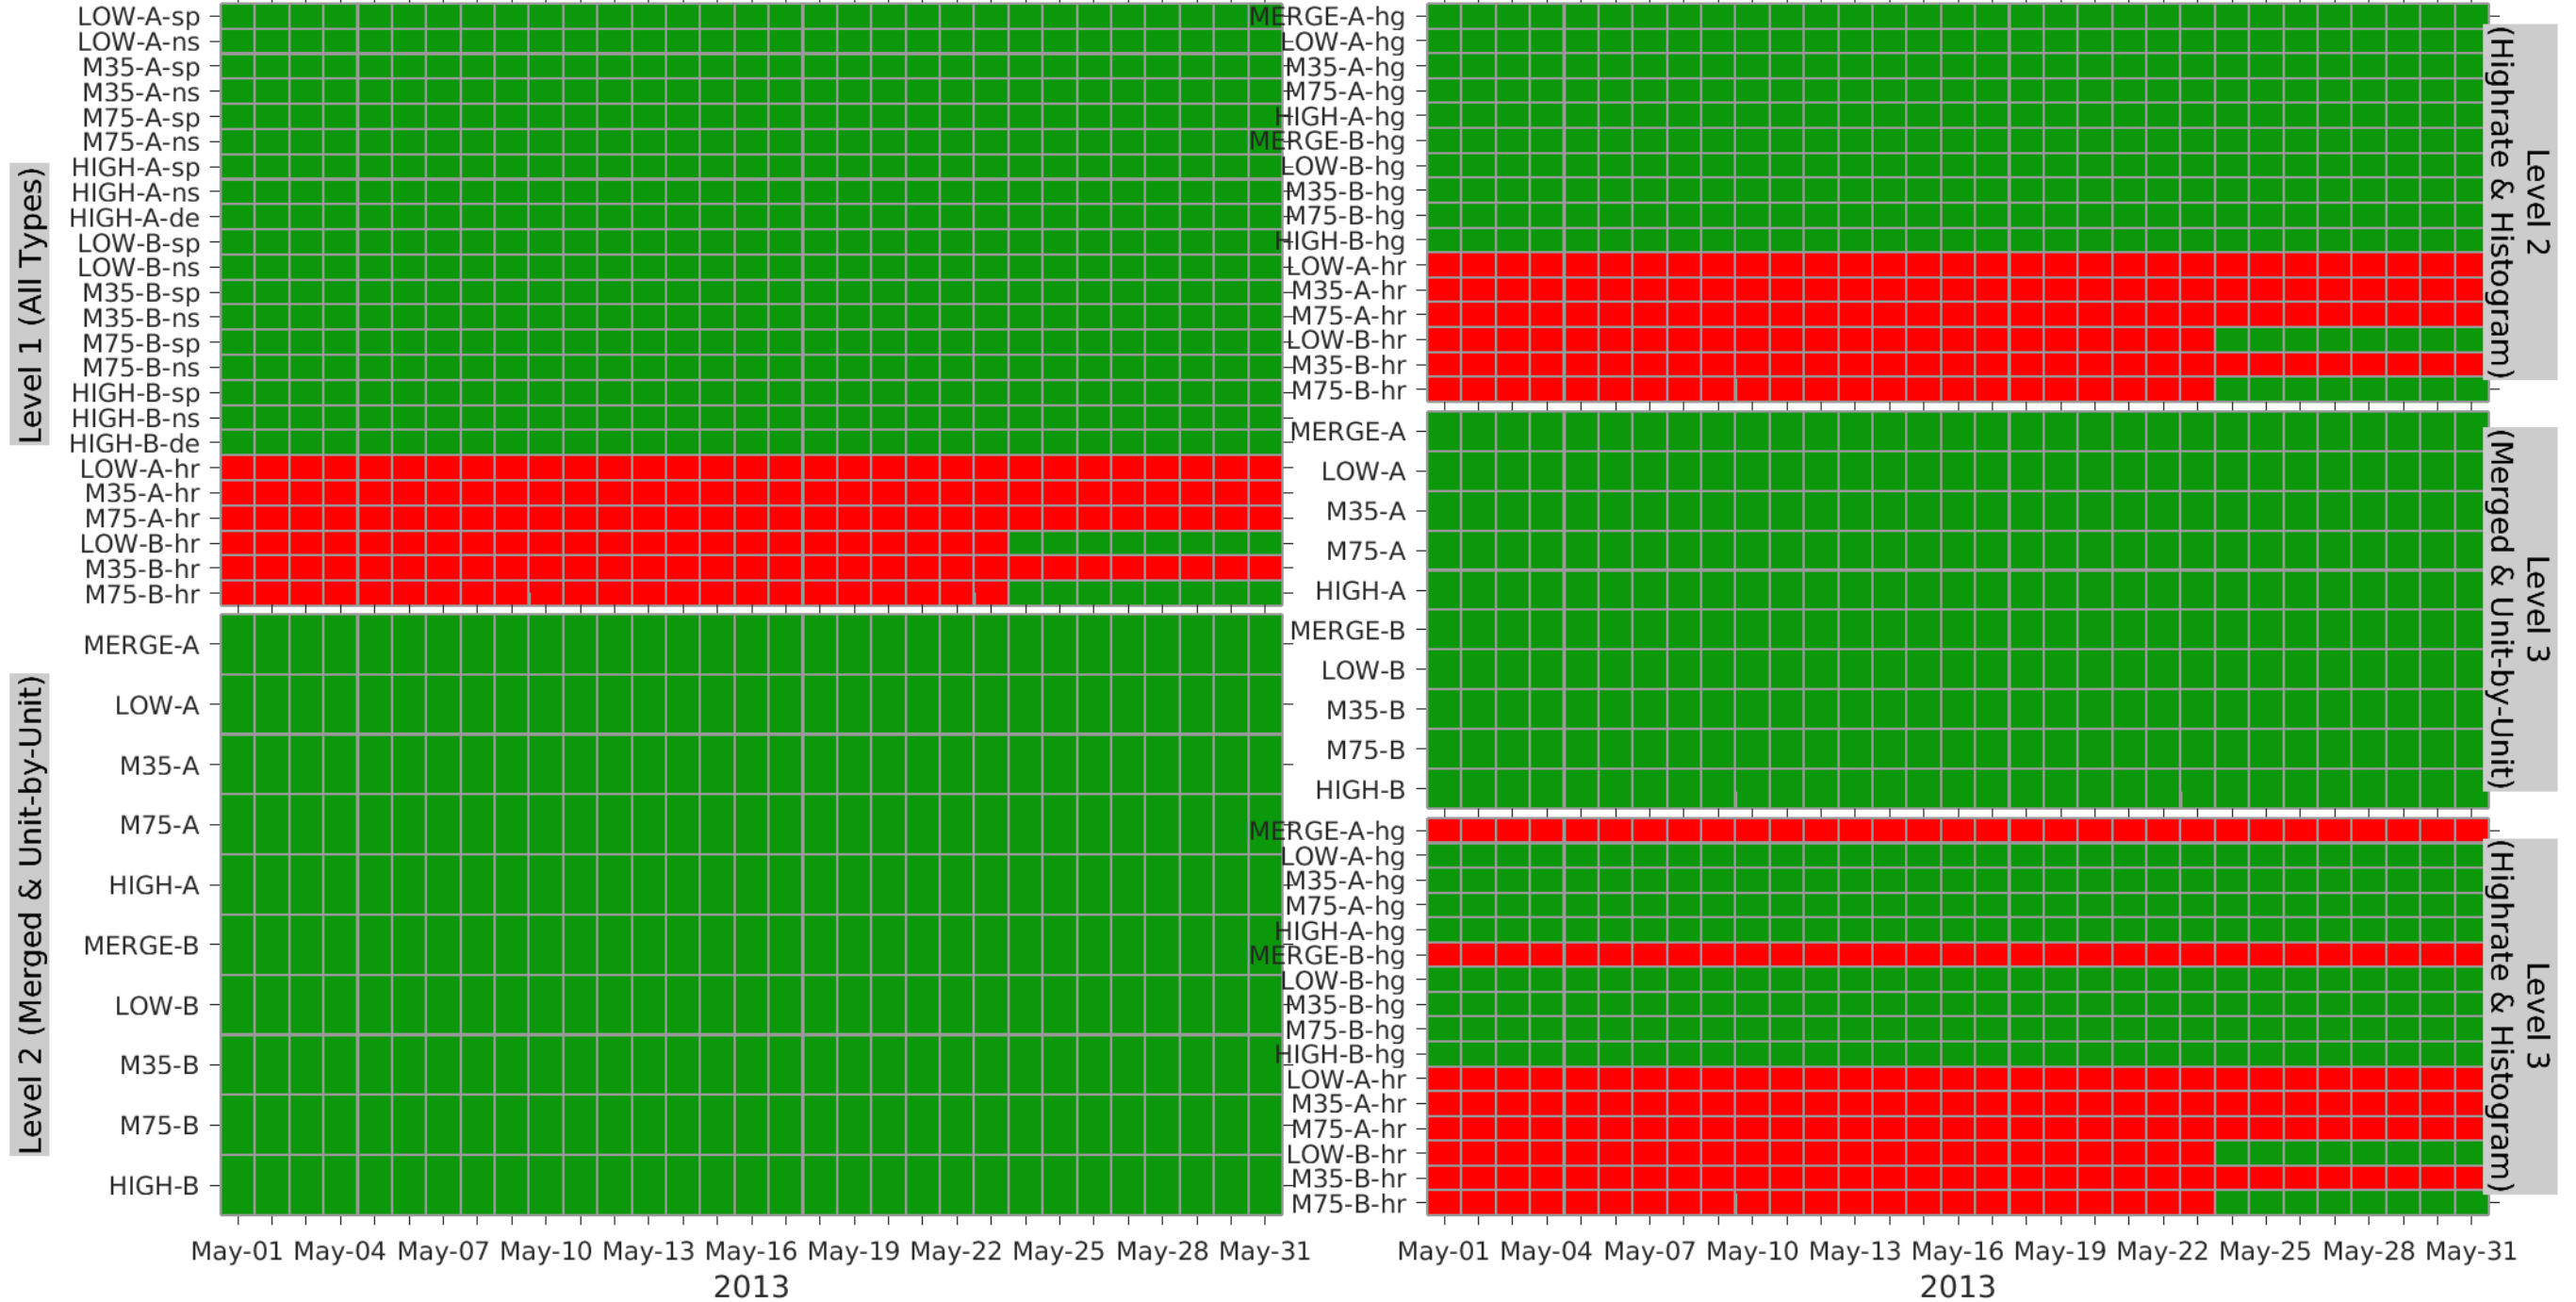

MagEIS Data Files | Created on: 2021/10/21 | Green = File Exists | Red = File Does Not Exist

sp=spin-based (science) | ns=non-science (housekeeping & status) | hr=highrate (LOW/MED only) | hg=histogram | de=direct event (HIGH only)

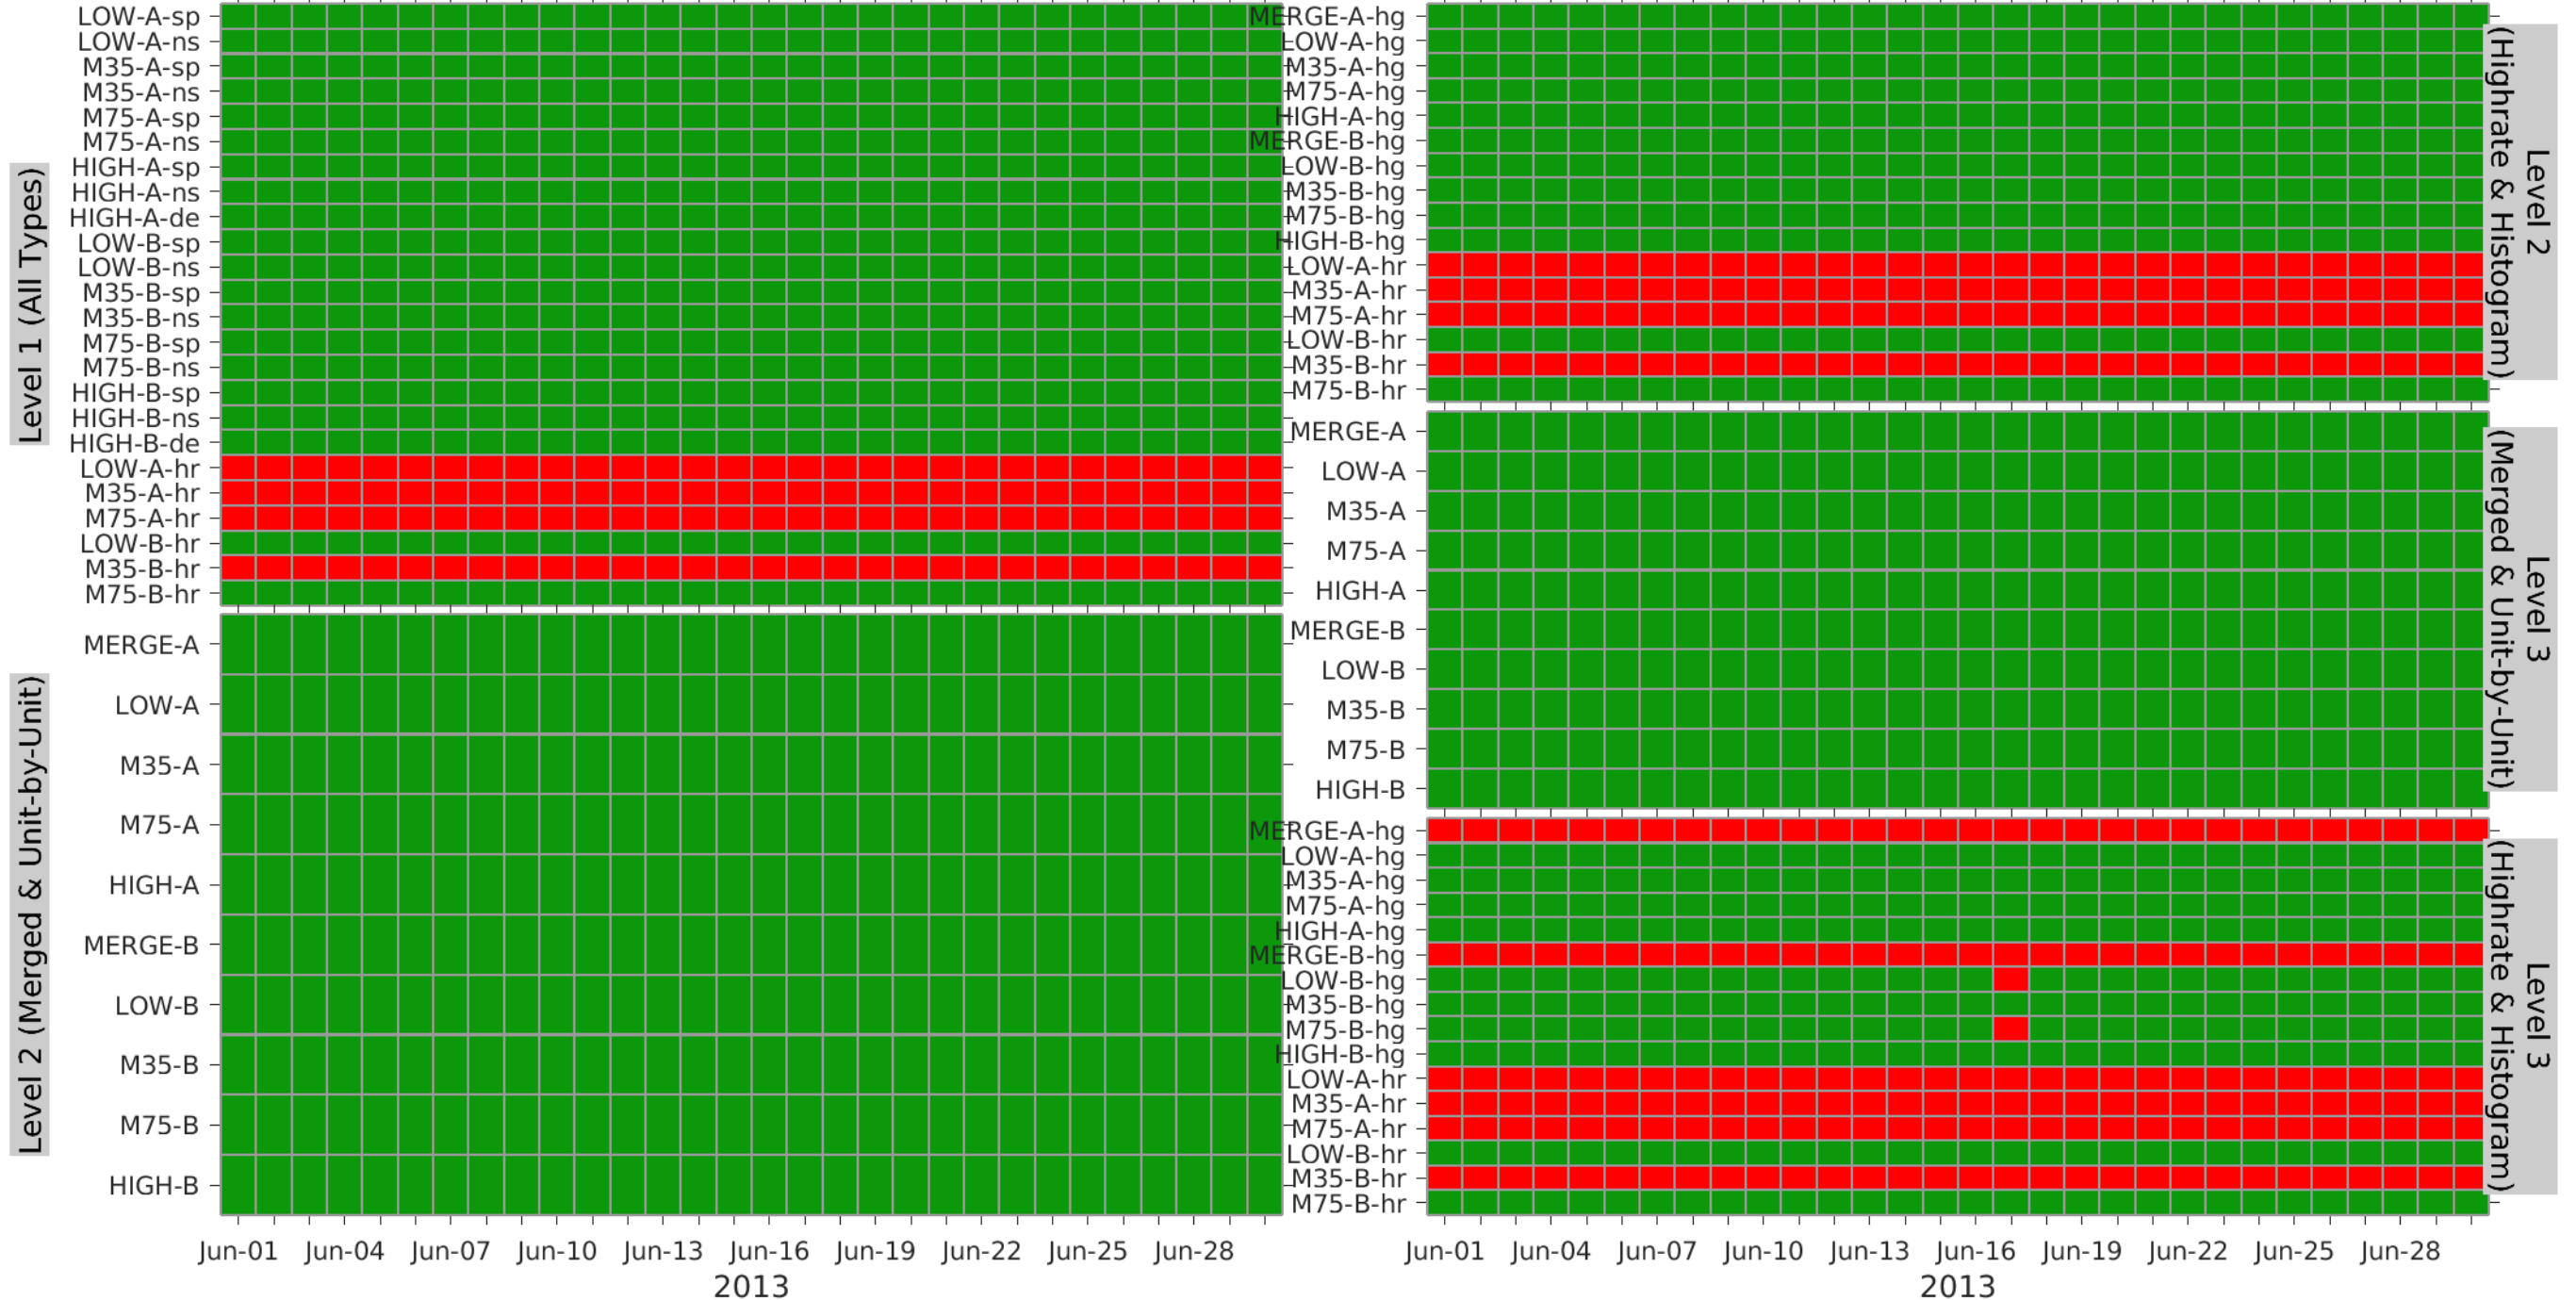

MagEIS Data Files | Created on: 2021/10/21 | Green = File Exists | Red = File Does Not Exist

sp=spin-based (science) | ns=non-science (housekeeping & status) | hr=highrate (LOW/MED only) | hg=histogram | de=direct event (HIGH only)

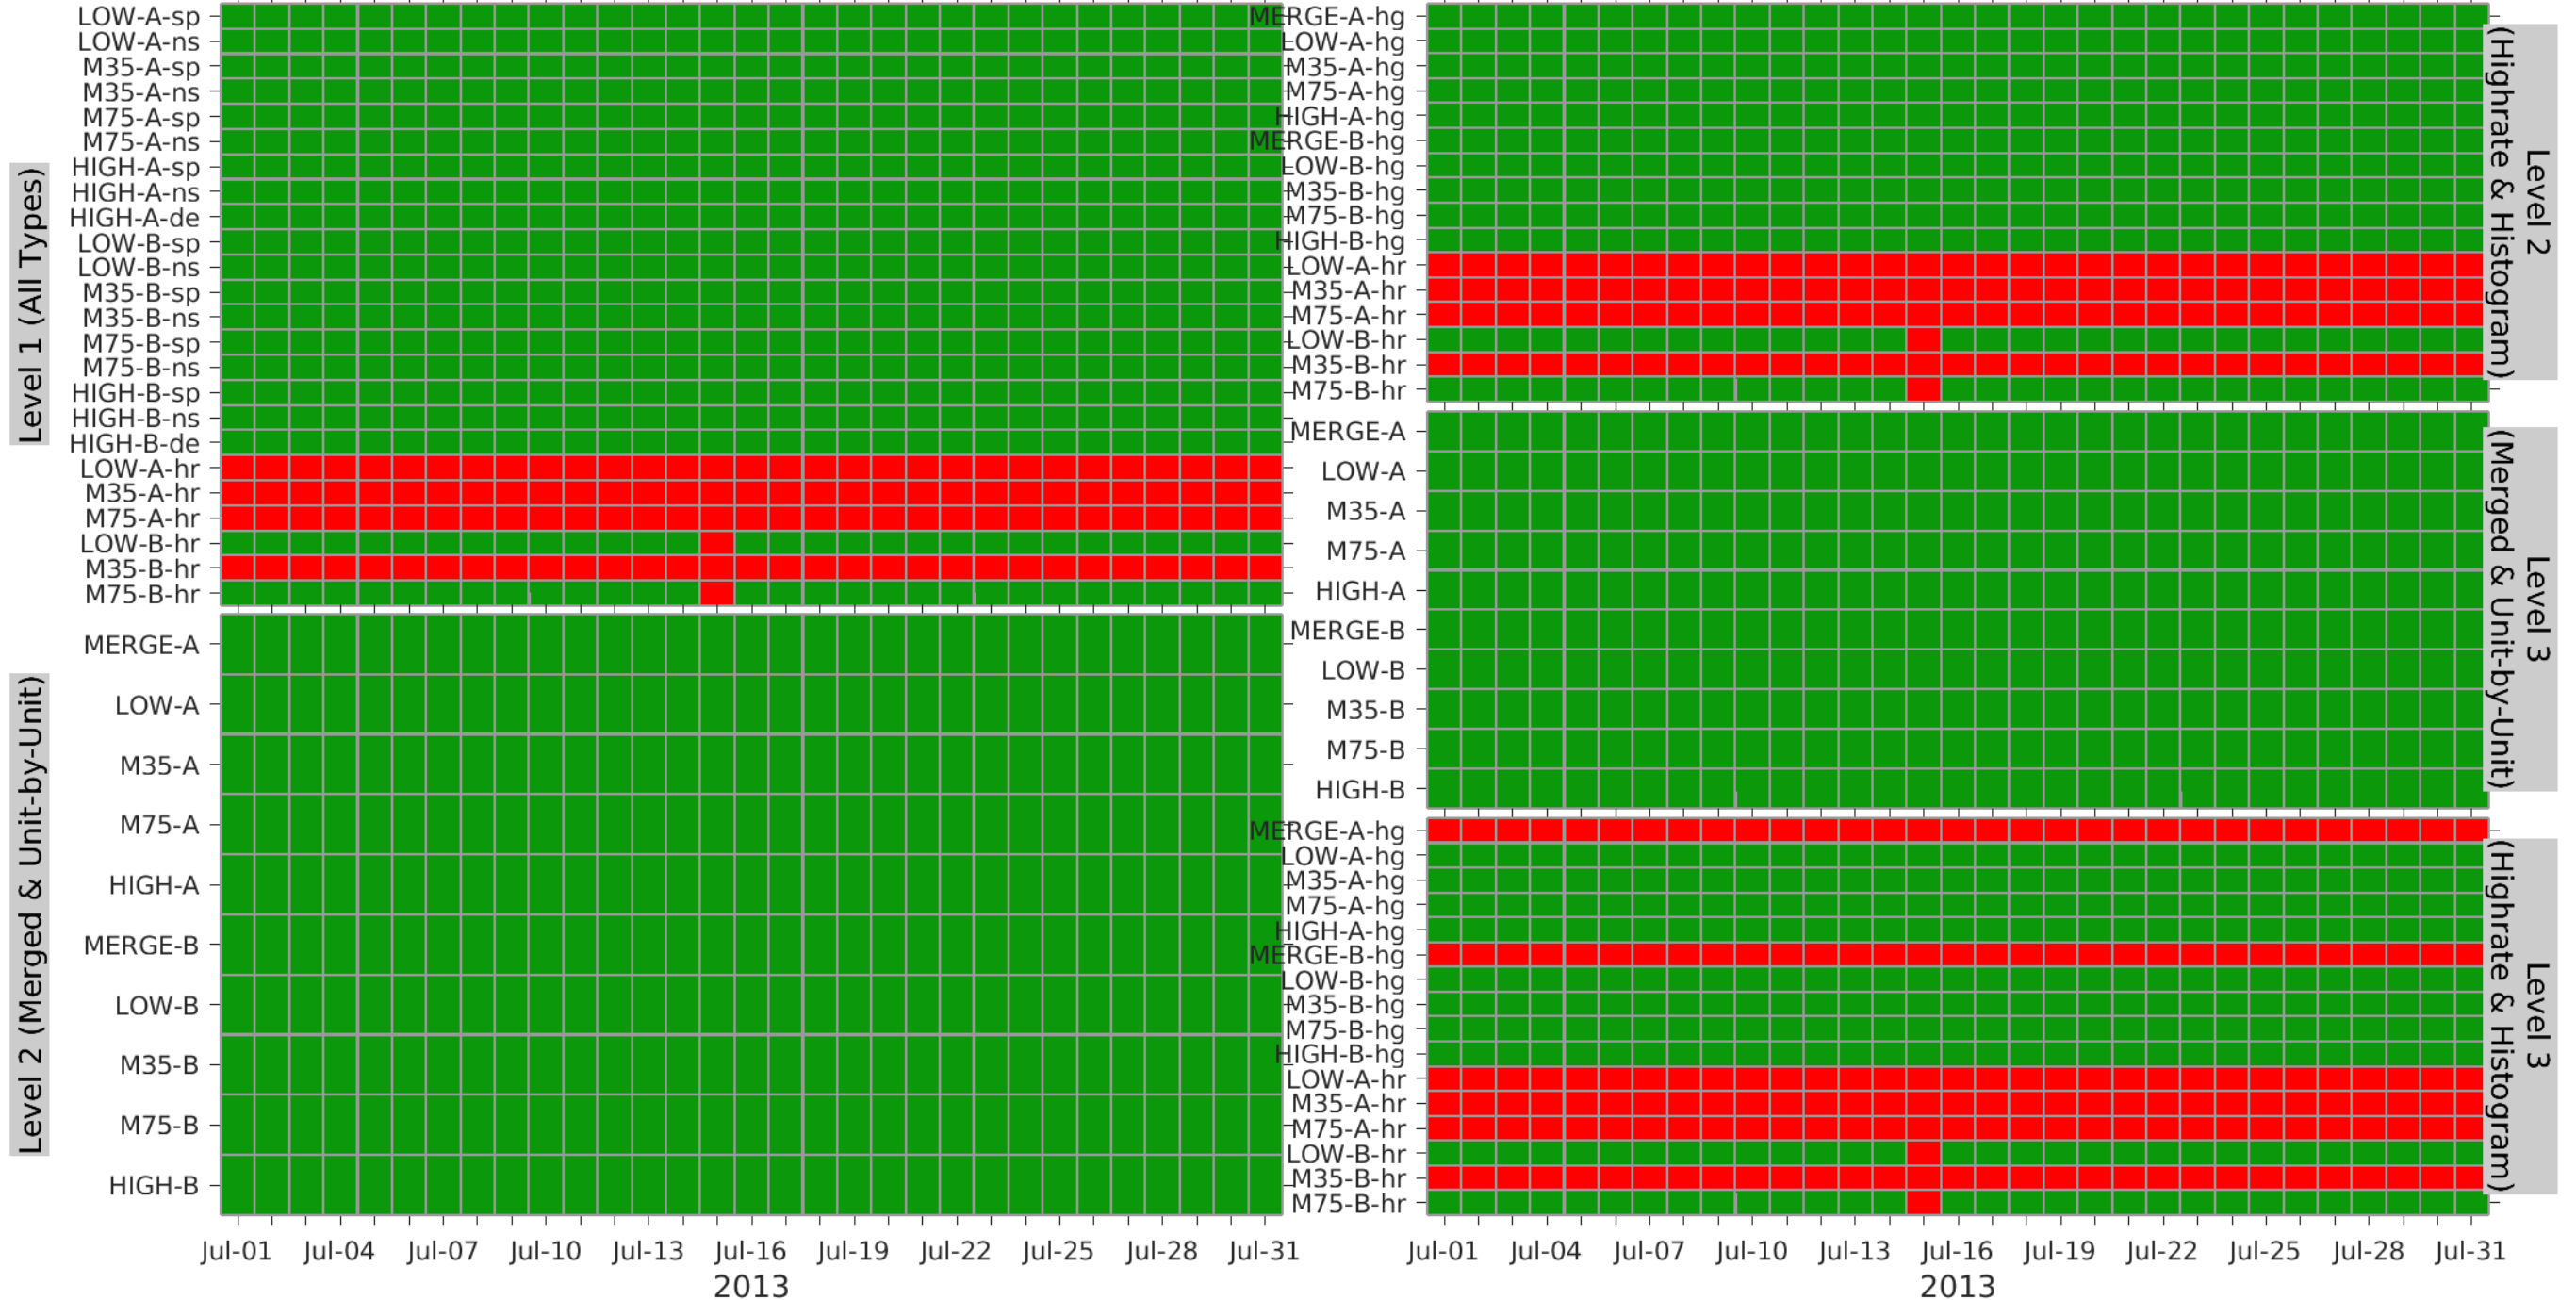

MagEIS Data Files | Created on: 2021/10/21 | Green = File Exists | Red = File Does Not Exist

sp=spin-based (science) | ns=non-science (housekeeping & status) | hr=highrate (LOW/MED only) | hg=histogram | de=direct event (HIGH only)

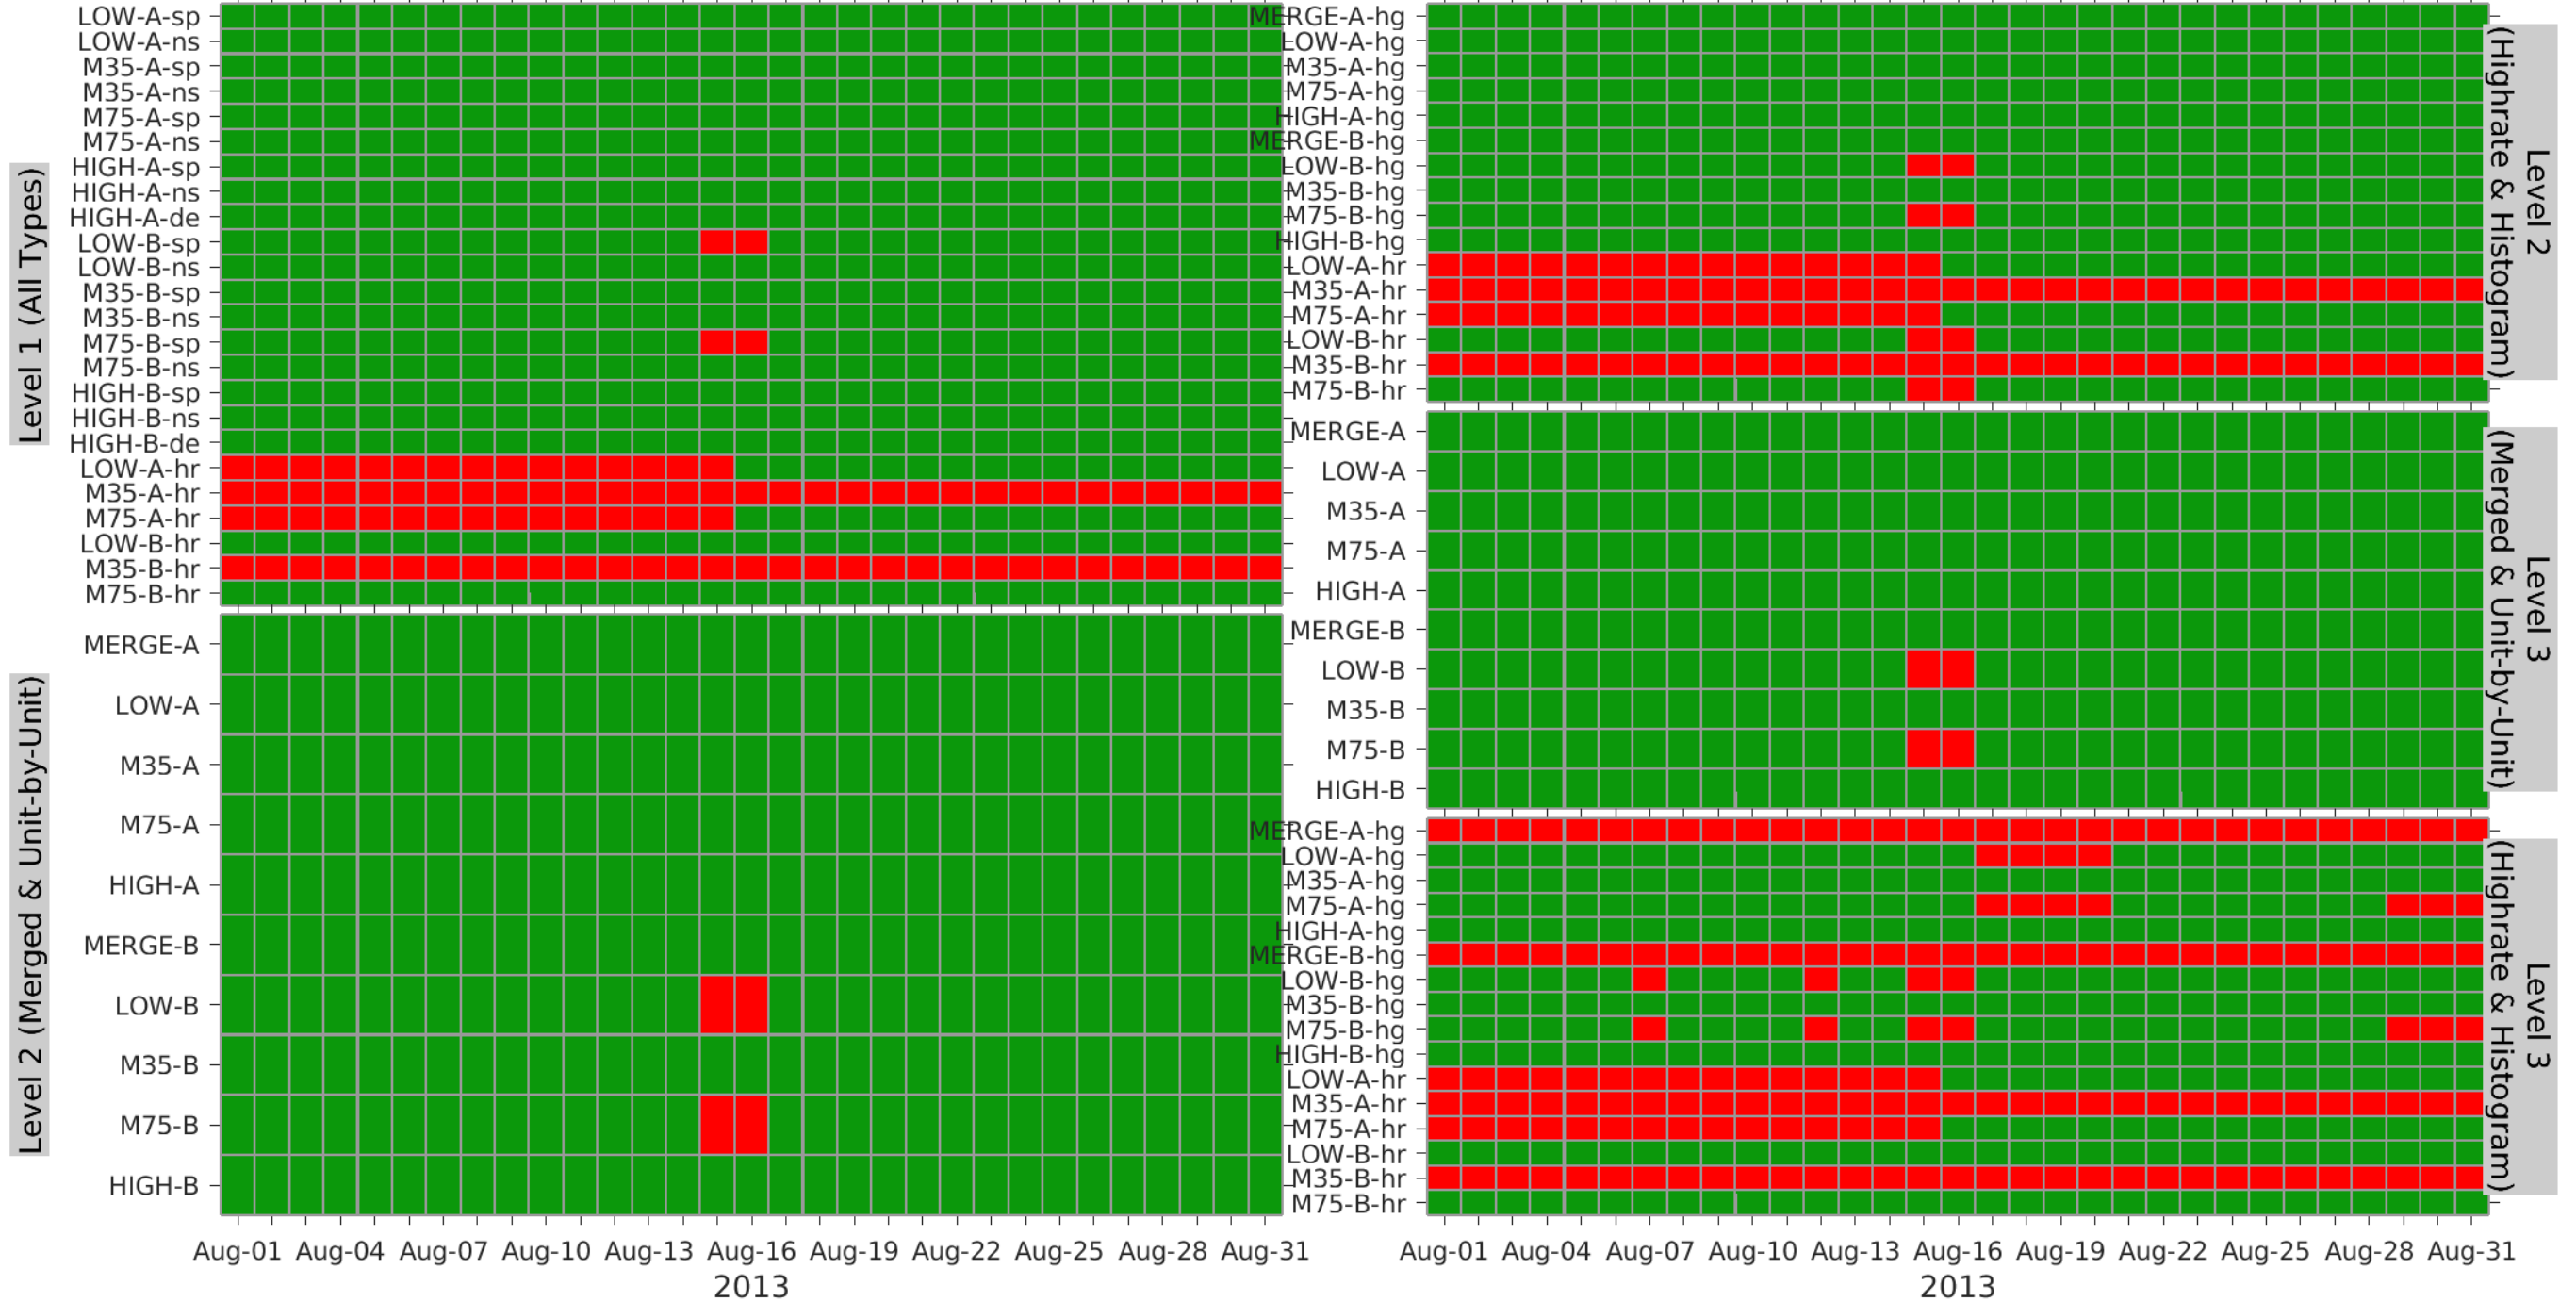

sp=spin-based (science) | ns=non-science (housekeeping & status) | hr=highrate (LOW/MED only) | hg=histogram | de=direct event (HIGH only)

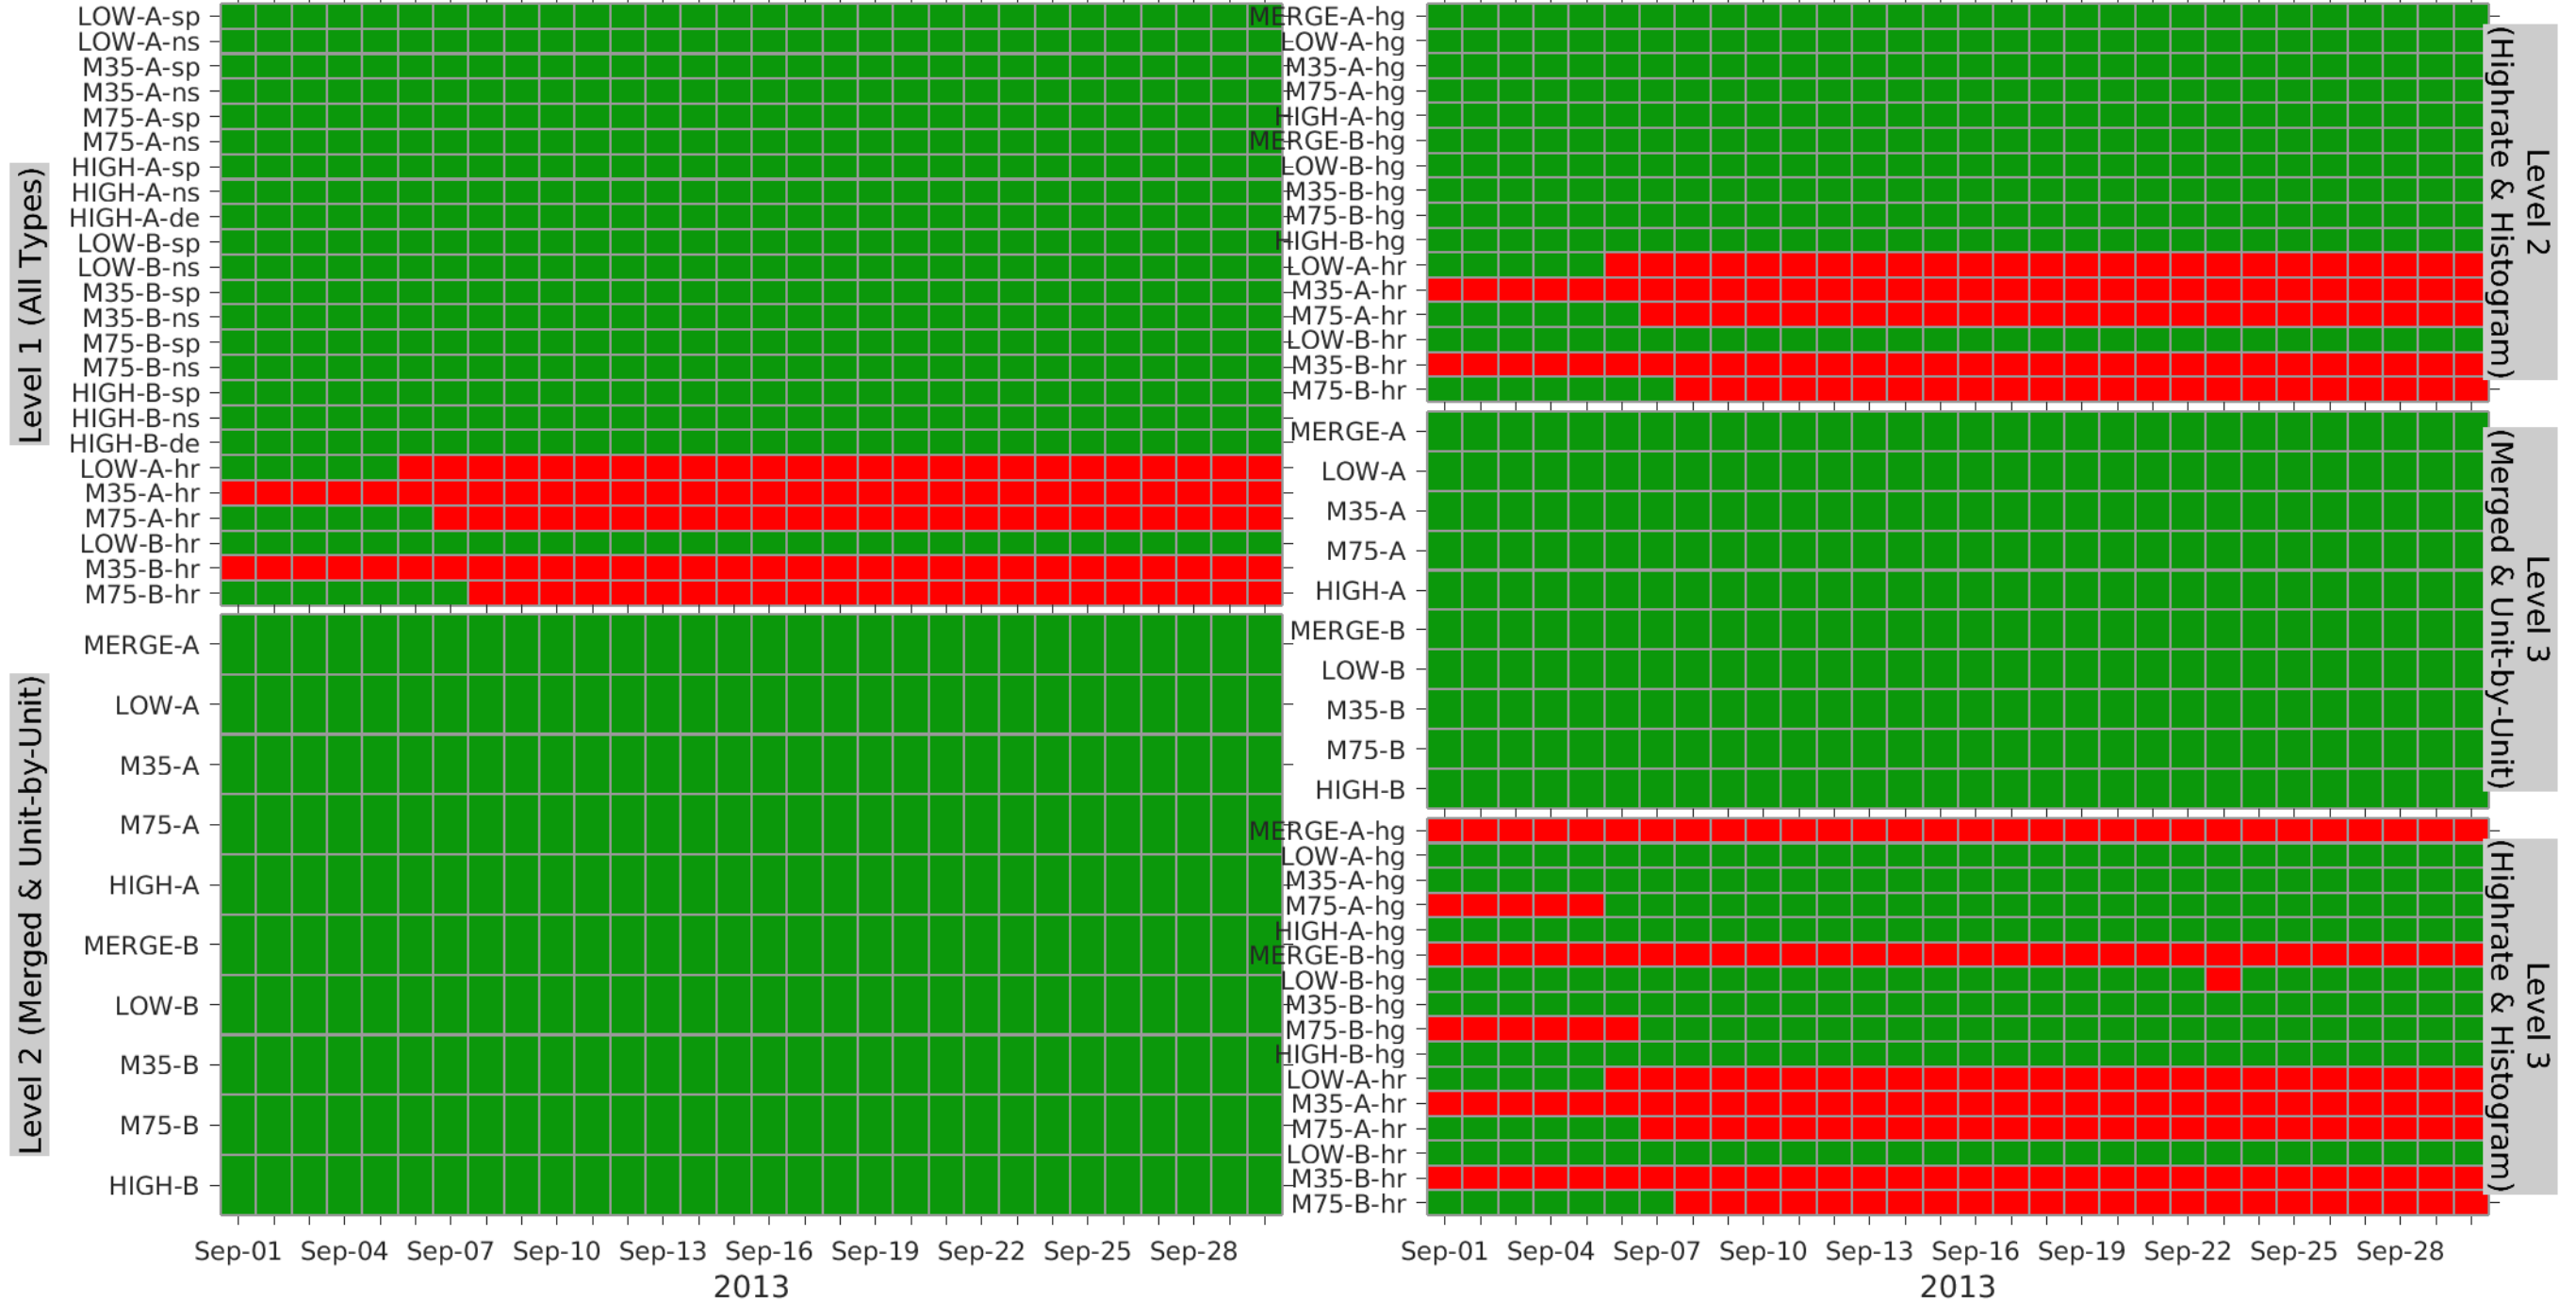

MagEIS Data Files | Created on: 2021/10/21 | Green = File Exists | Red = File Does Not Exist

sp=spin-based (science) | ns=non-science (housekeeping & status) | hr=highrate (LOW/MED only) | hg=histogram | de=direct event (HIGH only)

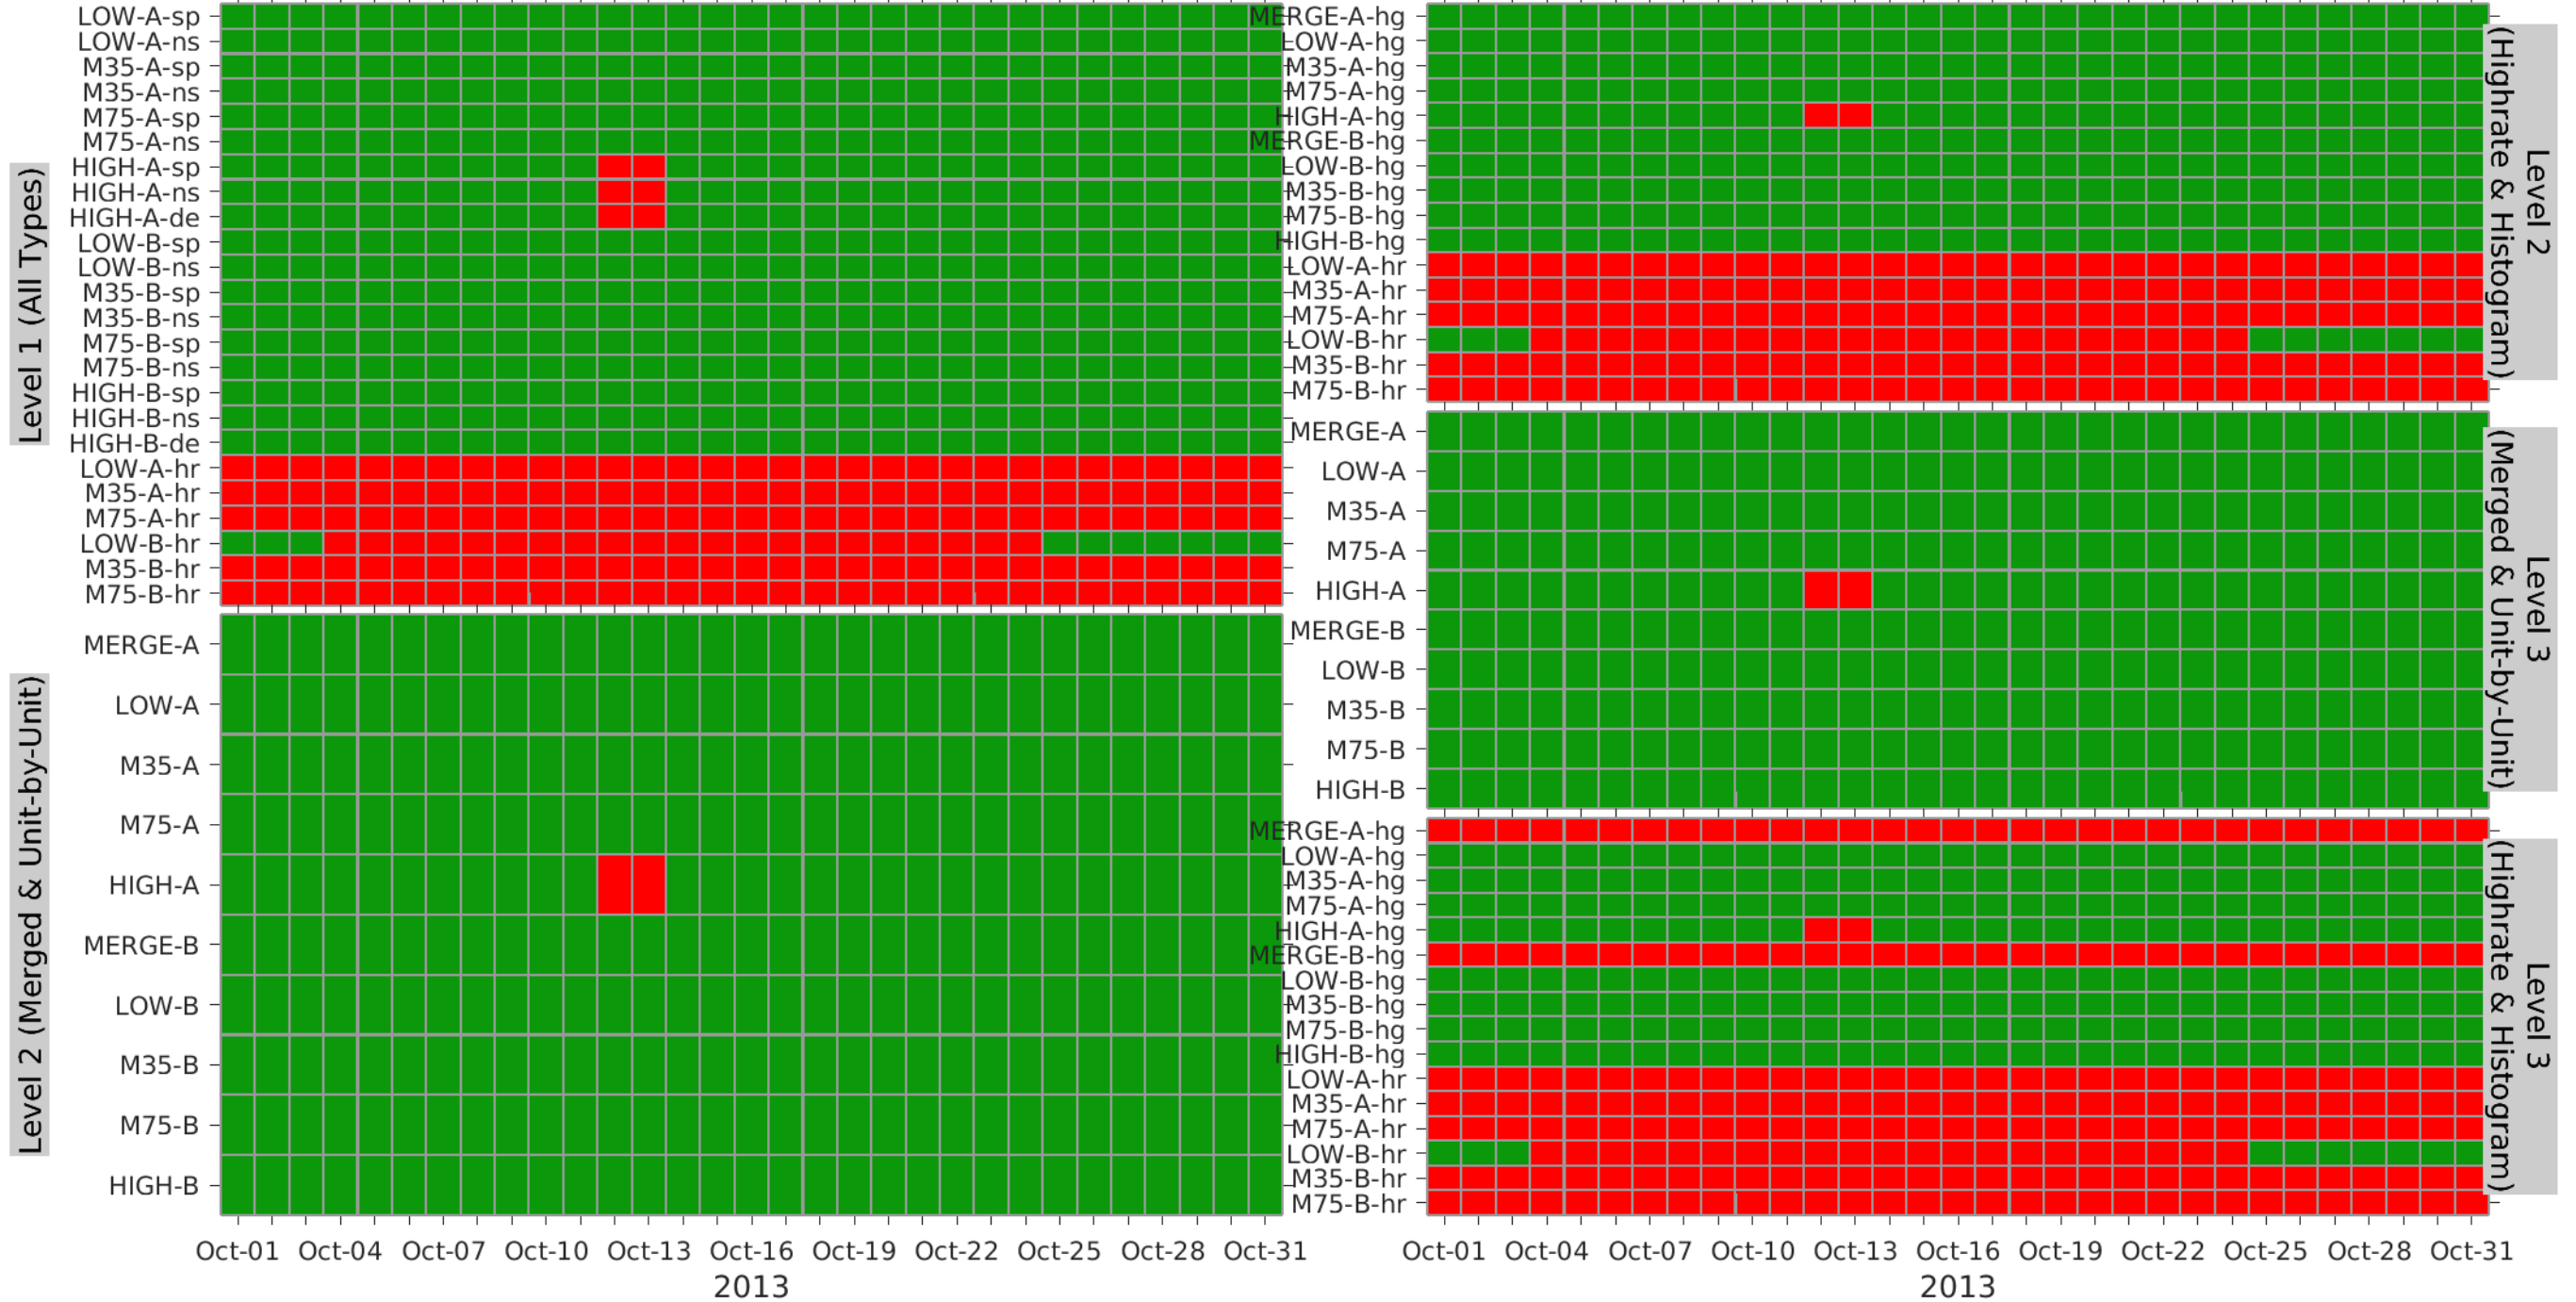

MagEIS Data Files | Created on: 2021/10/21 | Green = File Exists | Red = File Does Not Exist

sp=spin-based (science) | ns=non-science (housekeeping & status) | hr=highrate (LOW/MED only) | hg=histogram | de=direct event (HIGH only)

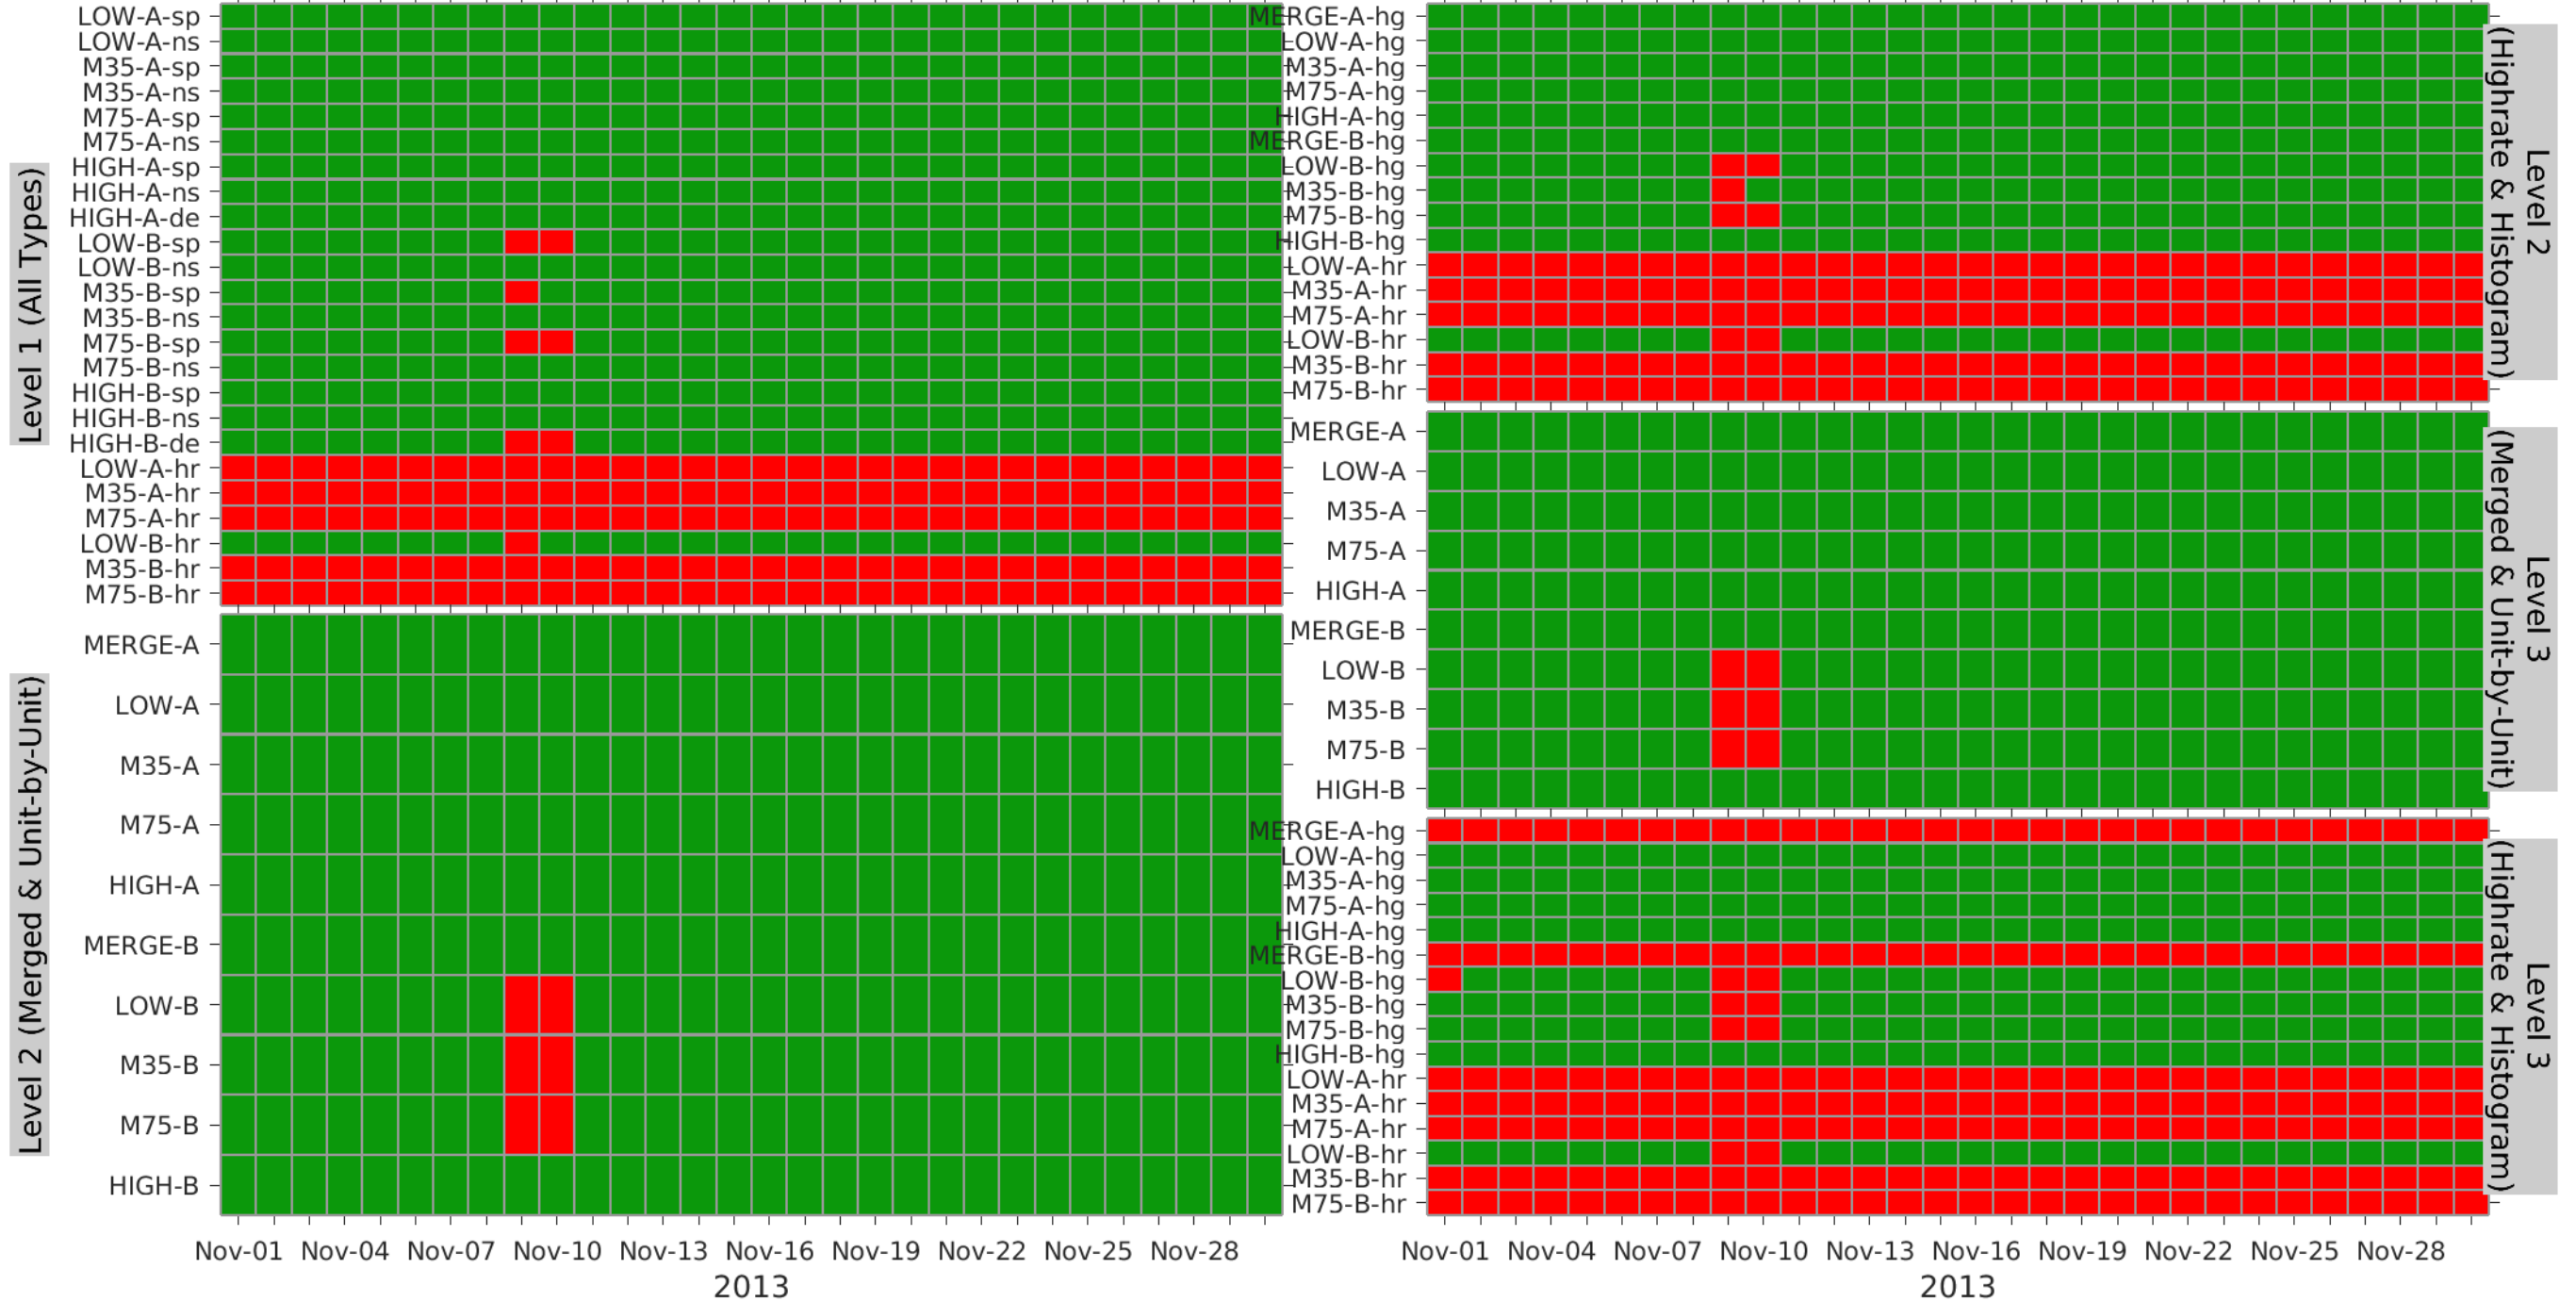



MagEIS Data Files | Created on: 2021/10/21 | Green = File Exists | Red = File Does Not Exist

sp=spin-based (science) | ns=non-science (housekeeping & status) | hr=highrate (LOW/MED only) | hg=histogram | de=direct event (HIGH only)

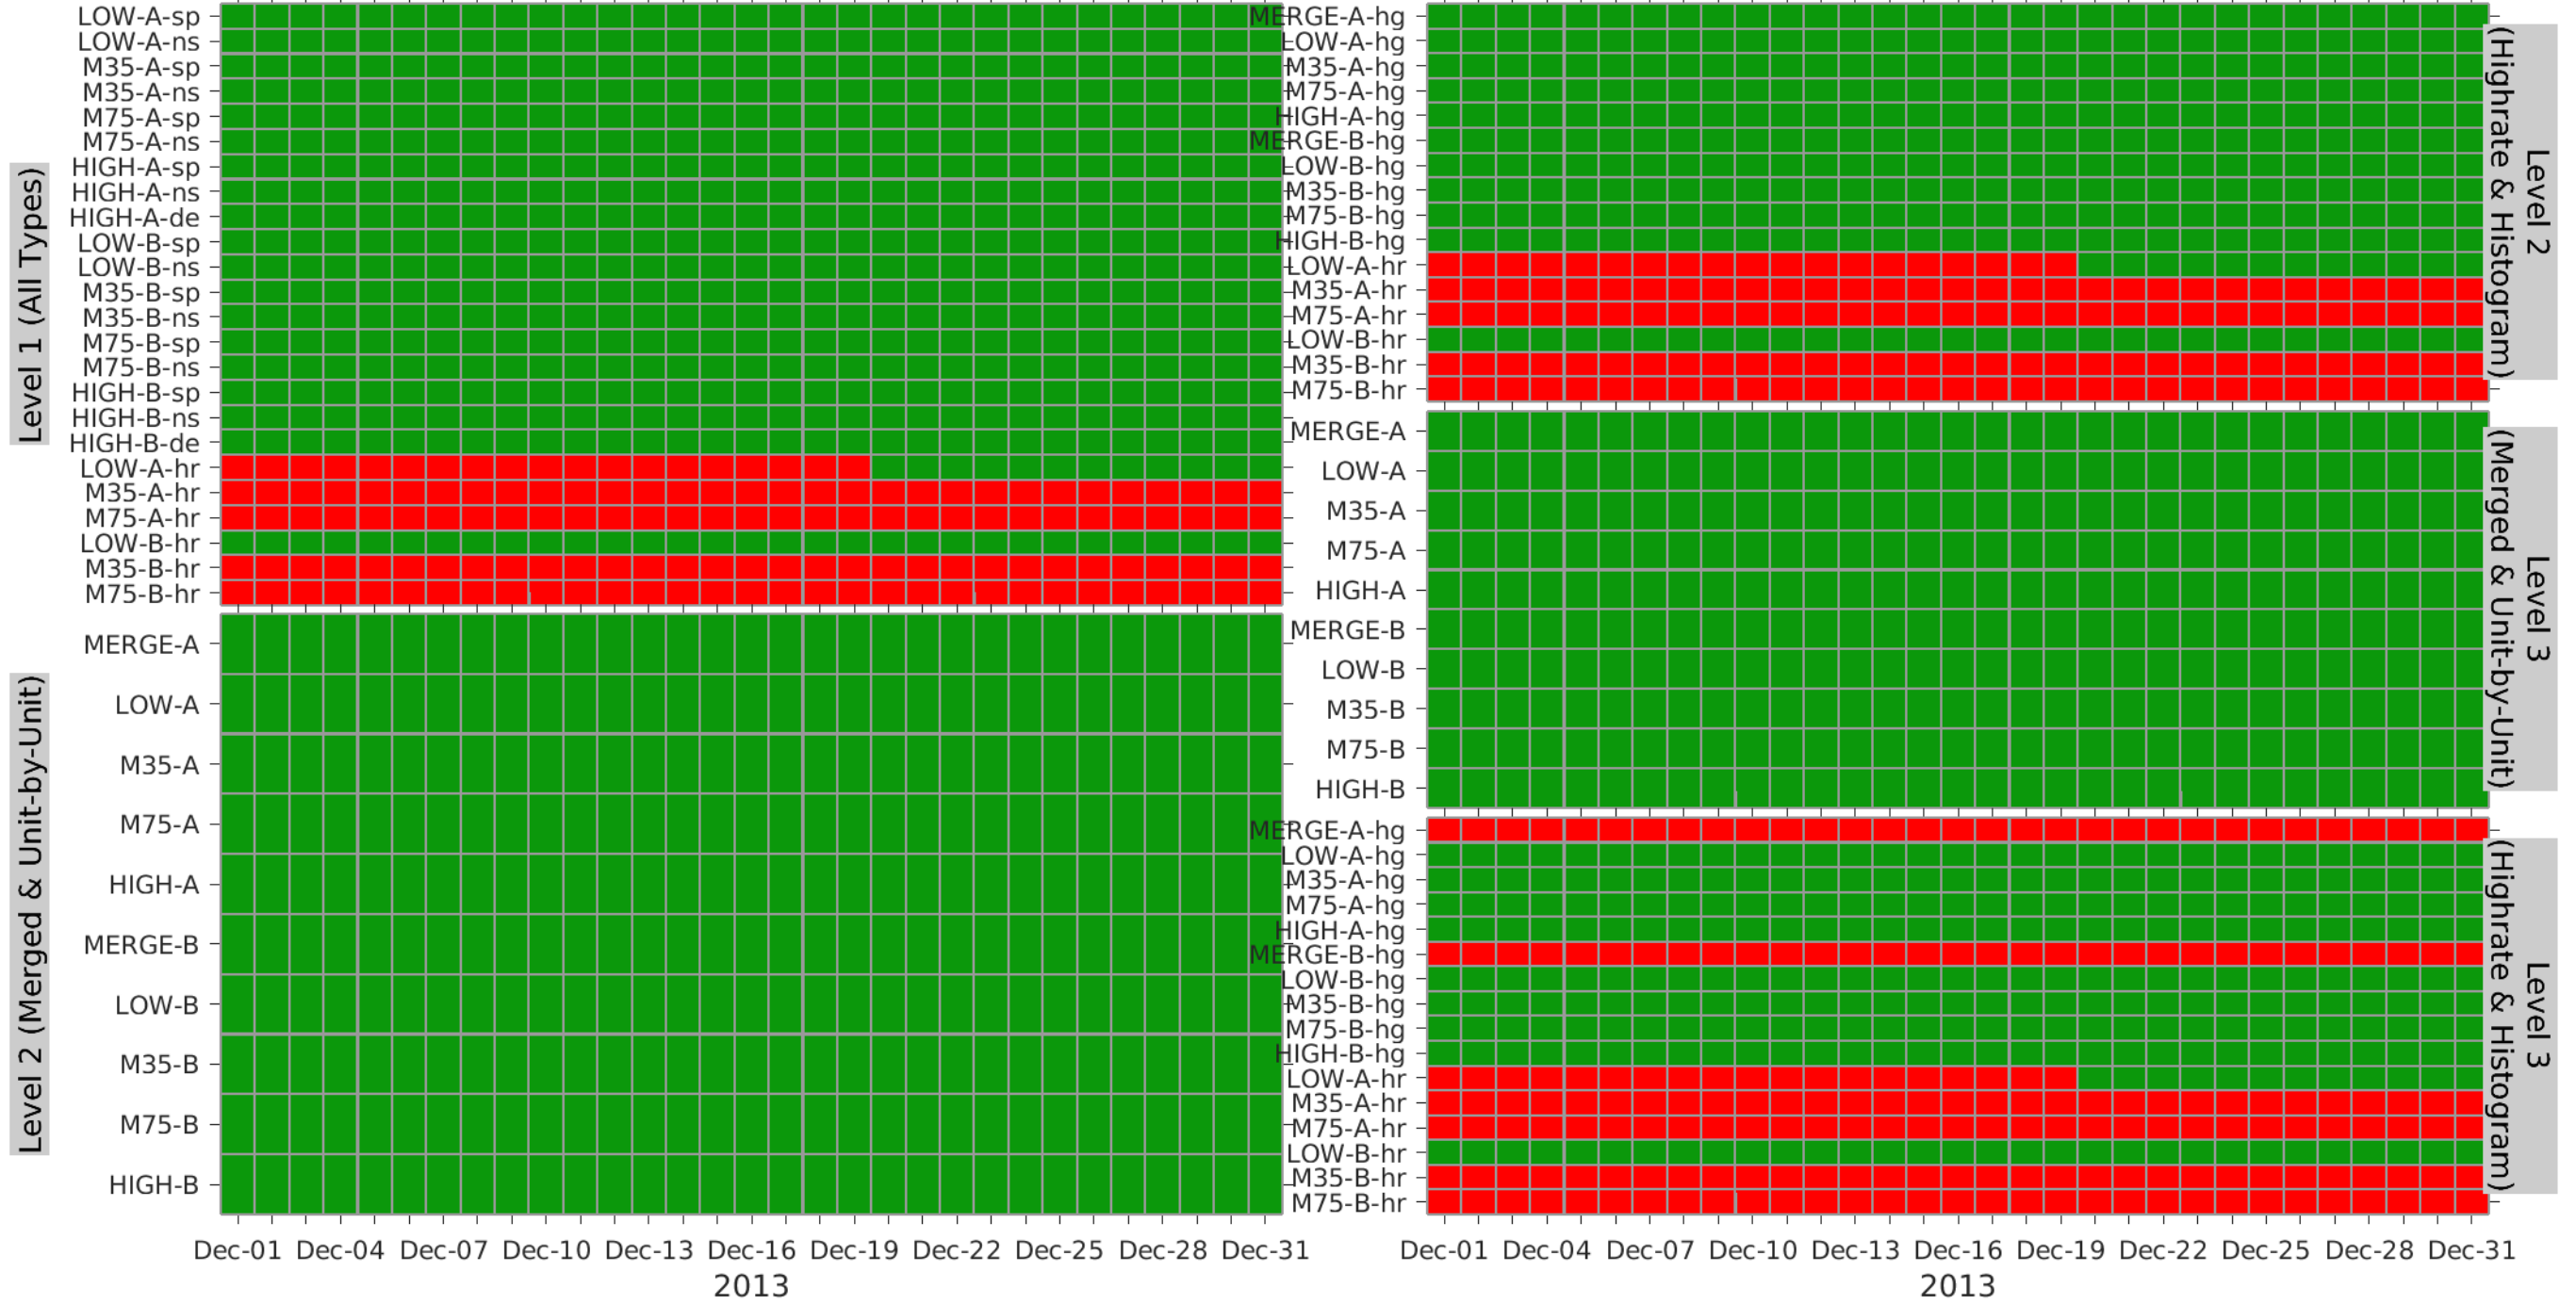

MagEIS Data Files | Created on: 2021/10/21 | Green = File Exists | Red = File Does Not Exist

sp=spin-based (science) | ns=non-science (housekeeping & status) | hr=highrate (LOW/MED only) | hg=histogram | de=direct event (HIGH only)

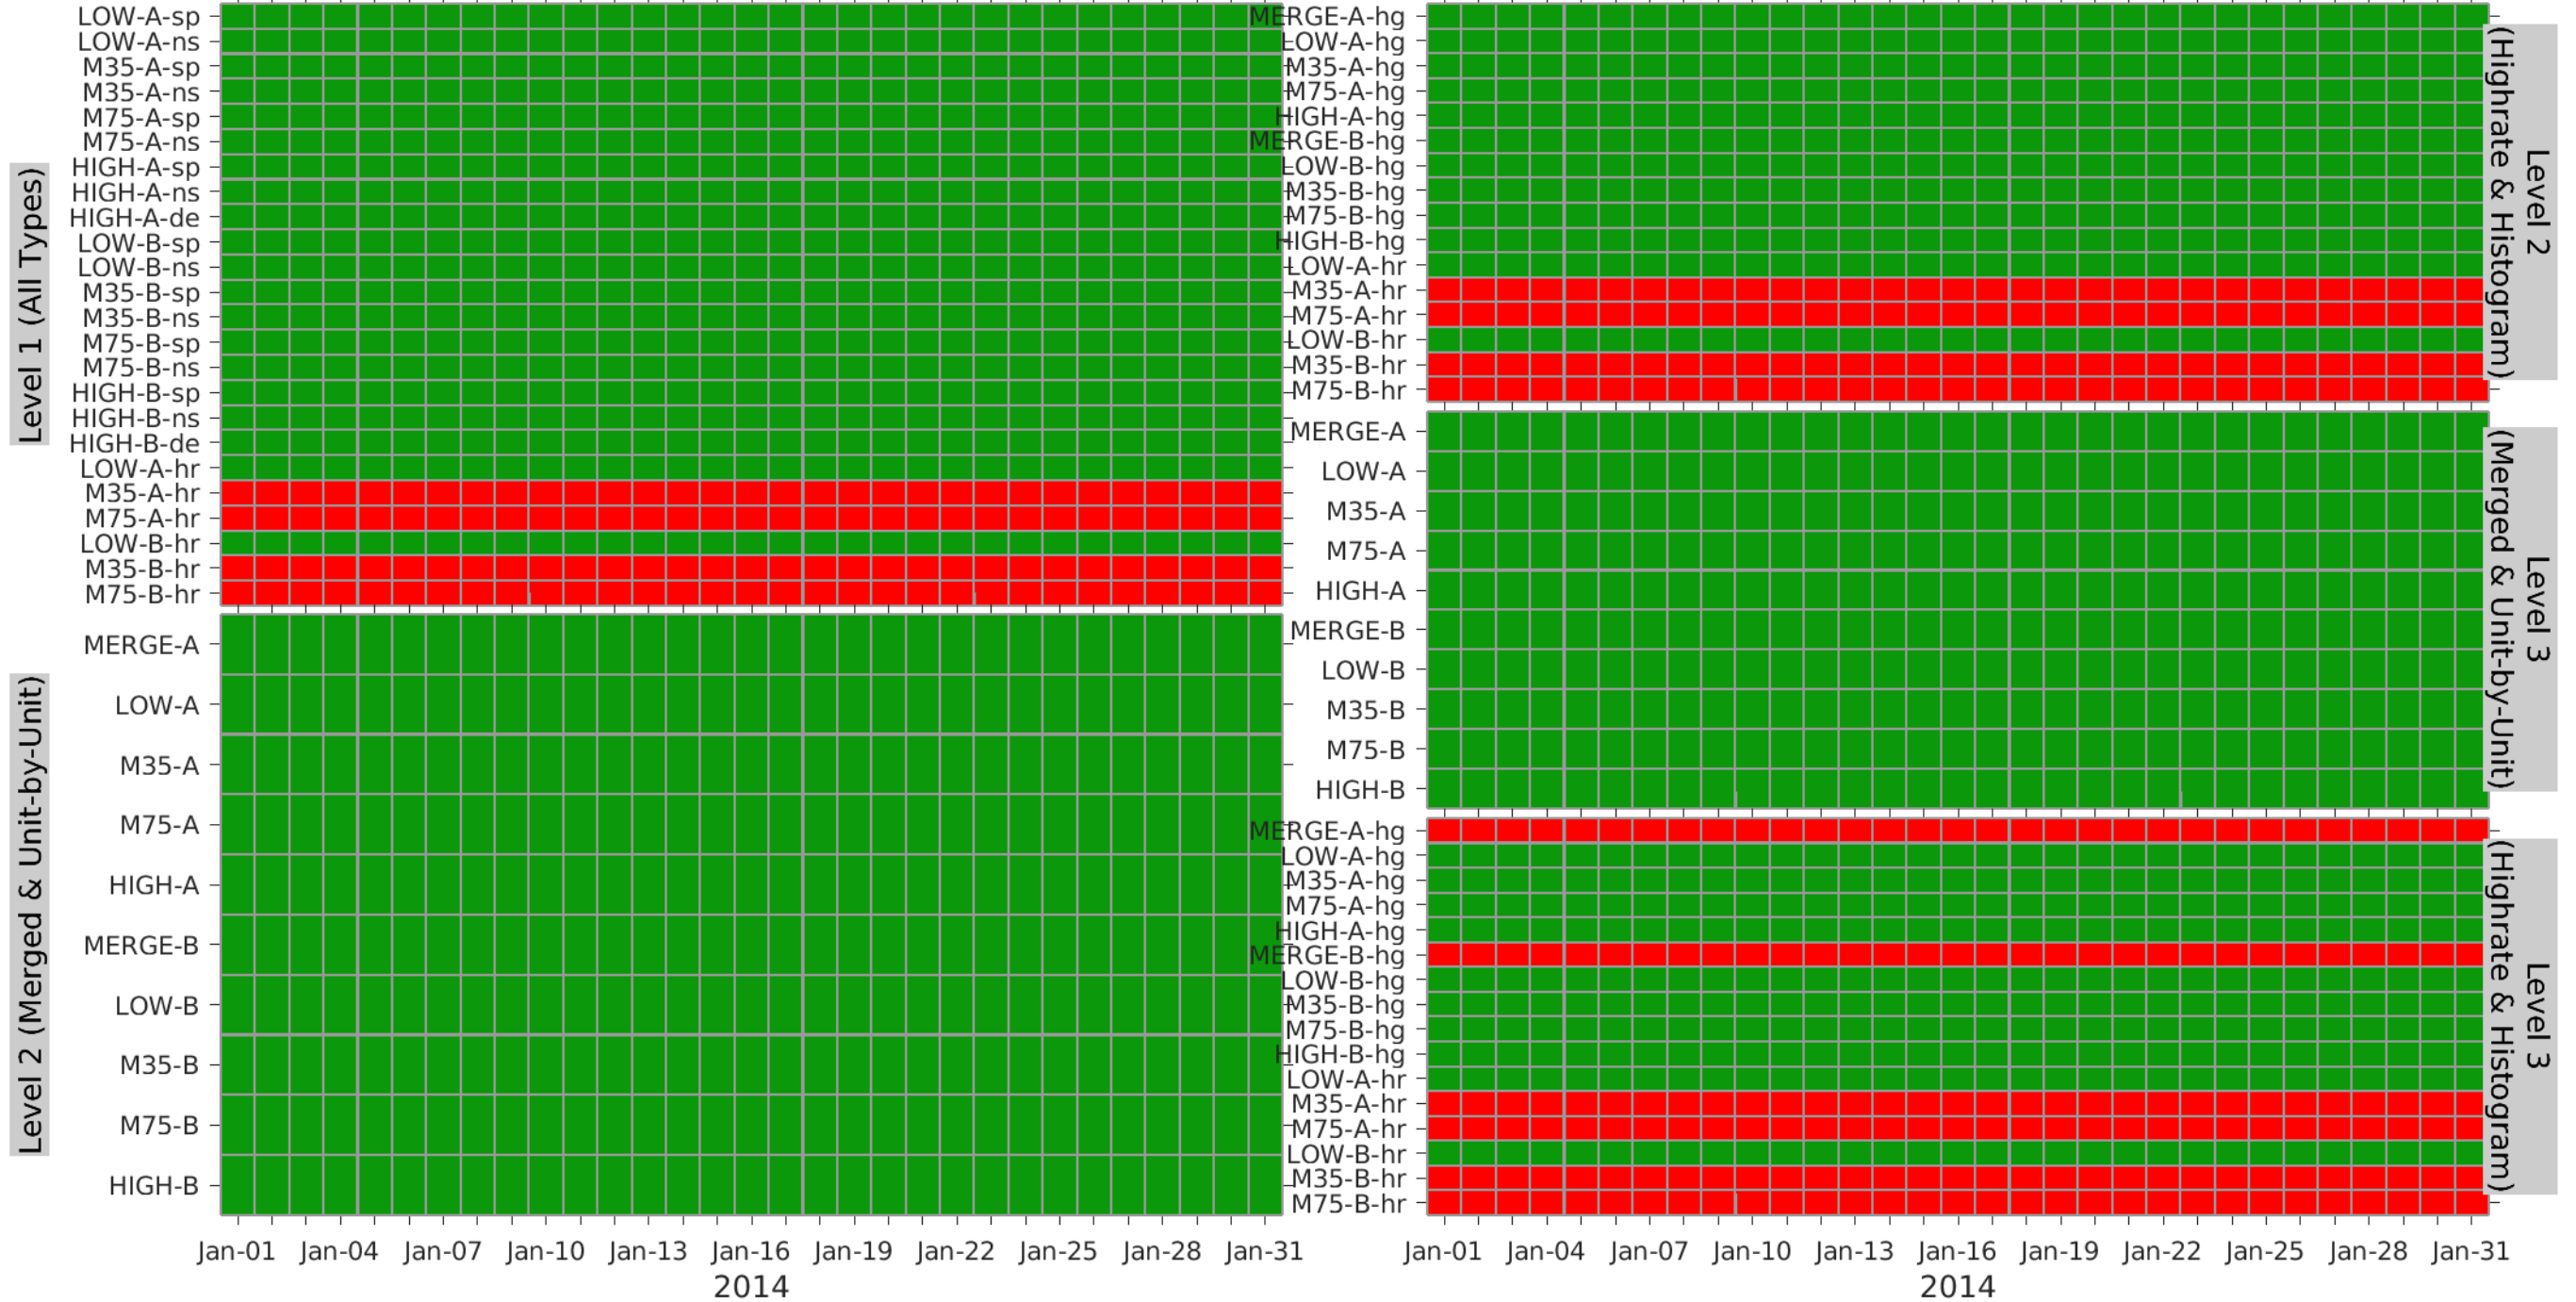

MagEIS Data Files | Created on: 2021/10/21 | Green = File Exists | Red = File Does Not Exist

sp=spin-based (science) | ns=non-science (housekeeping & status) | hr=highrate (LOW/MED only) | hg=histogram | de=direct event (HIGH only)

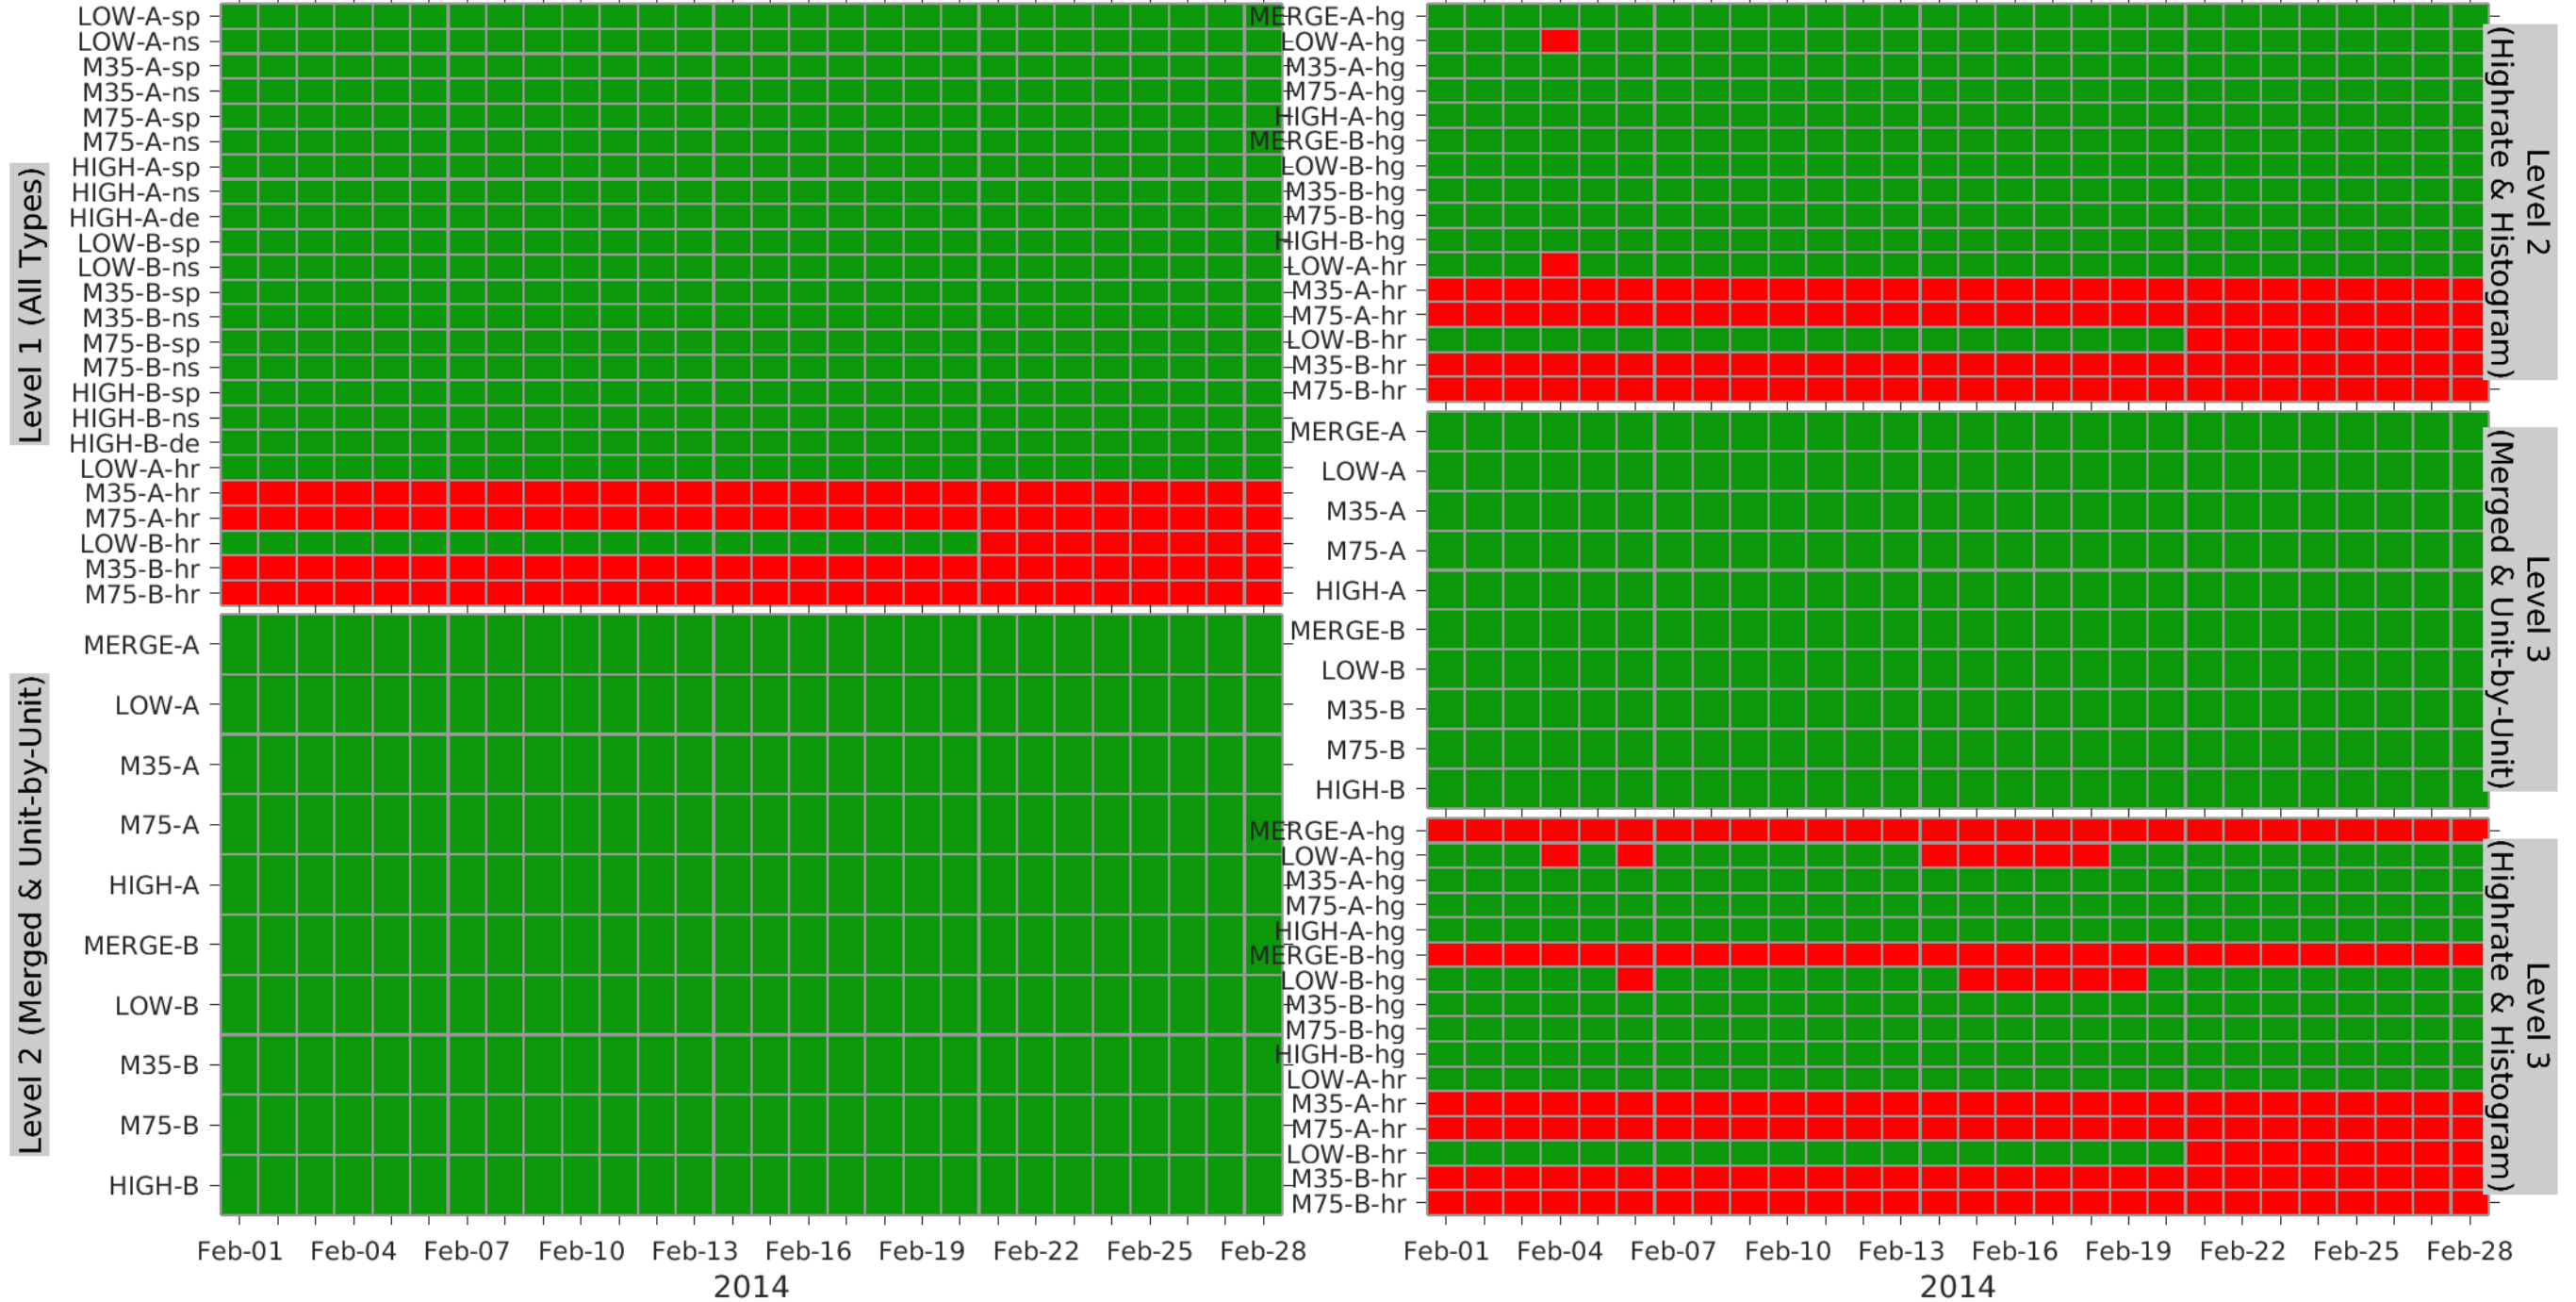

MagEIS Data Files | Created on: 2021/10/21 | Green = File Exists | Red = File Does Not Exist

sp=spin-based (science) | ns=non-science (housekeeping & status) | hr=highrate (LOW/MED only) | hg=histogram | de=direct event (HIGH only)

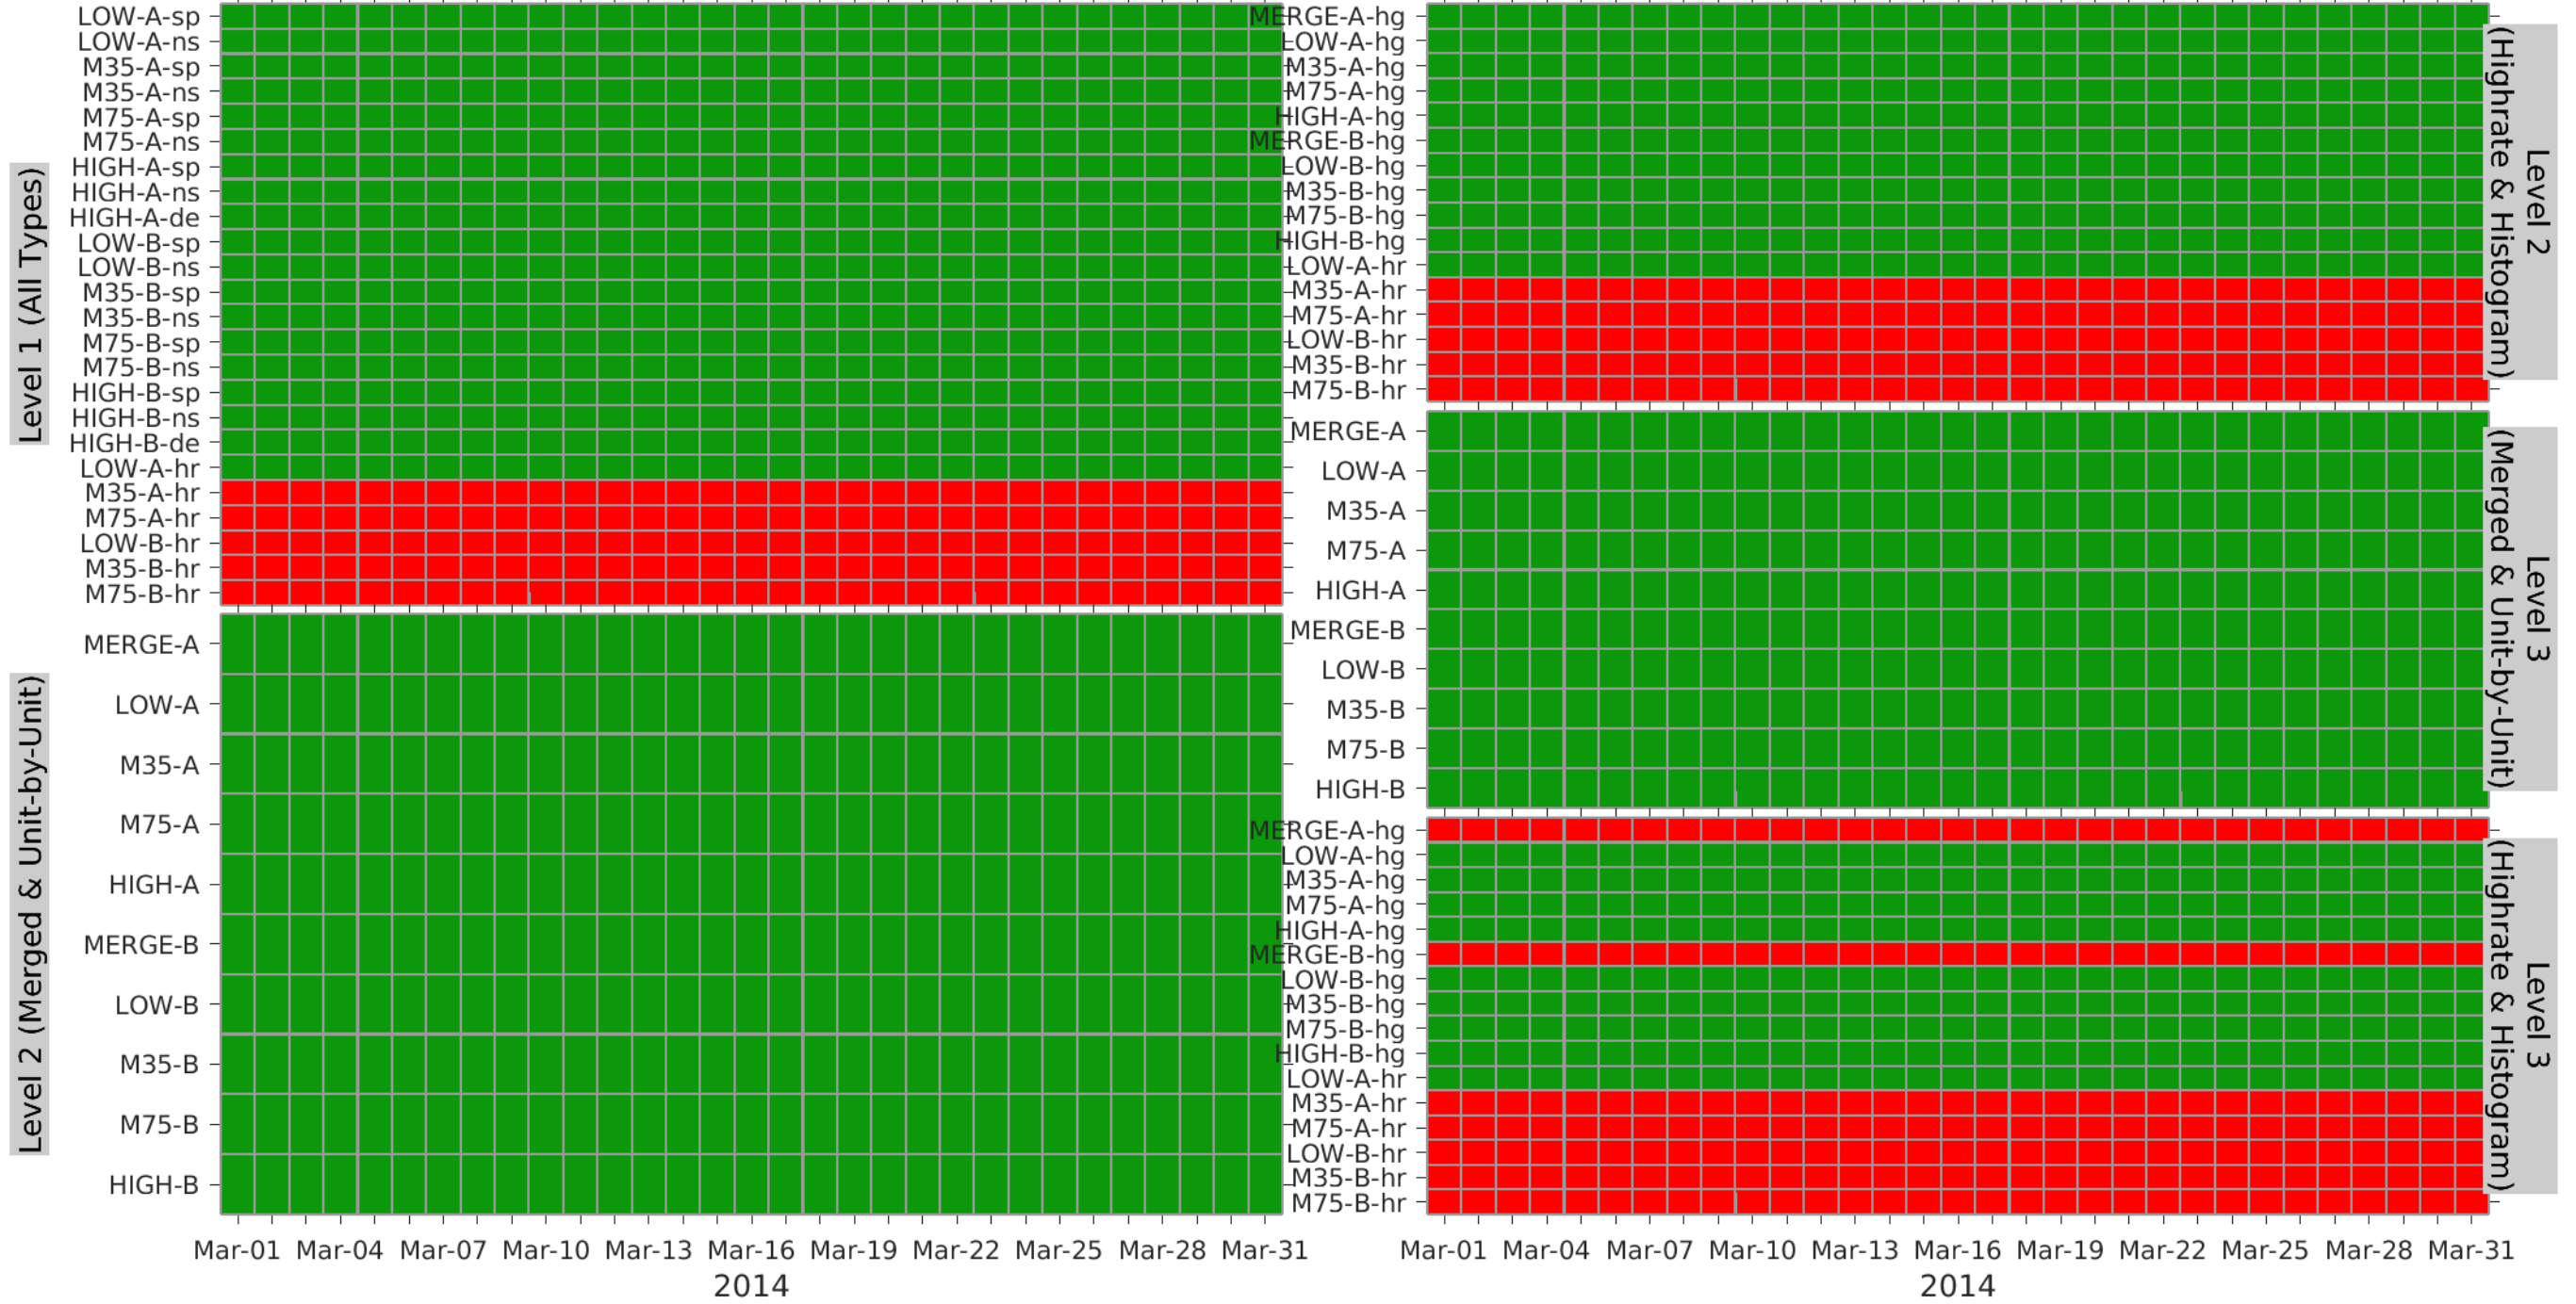

MagEIS Data Files | Created on: 2021/10/21 | Green = File Exists | Red = File Does Not Exist

sp=spin-based (science) | ns=non-science (housekeeping & status) | hr=highrate (LOW/MED only) | hg=histogram | de=direct event (HIGH only)

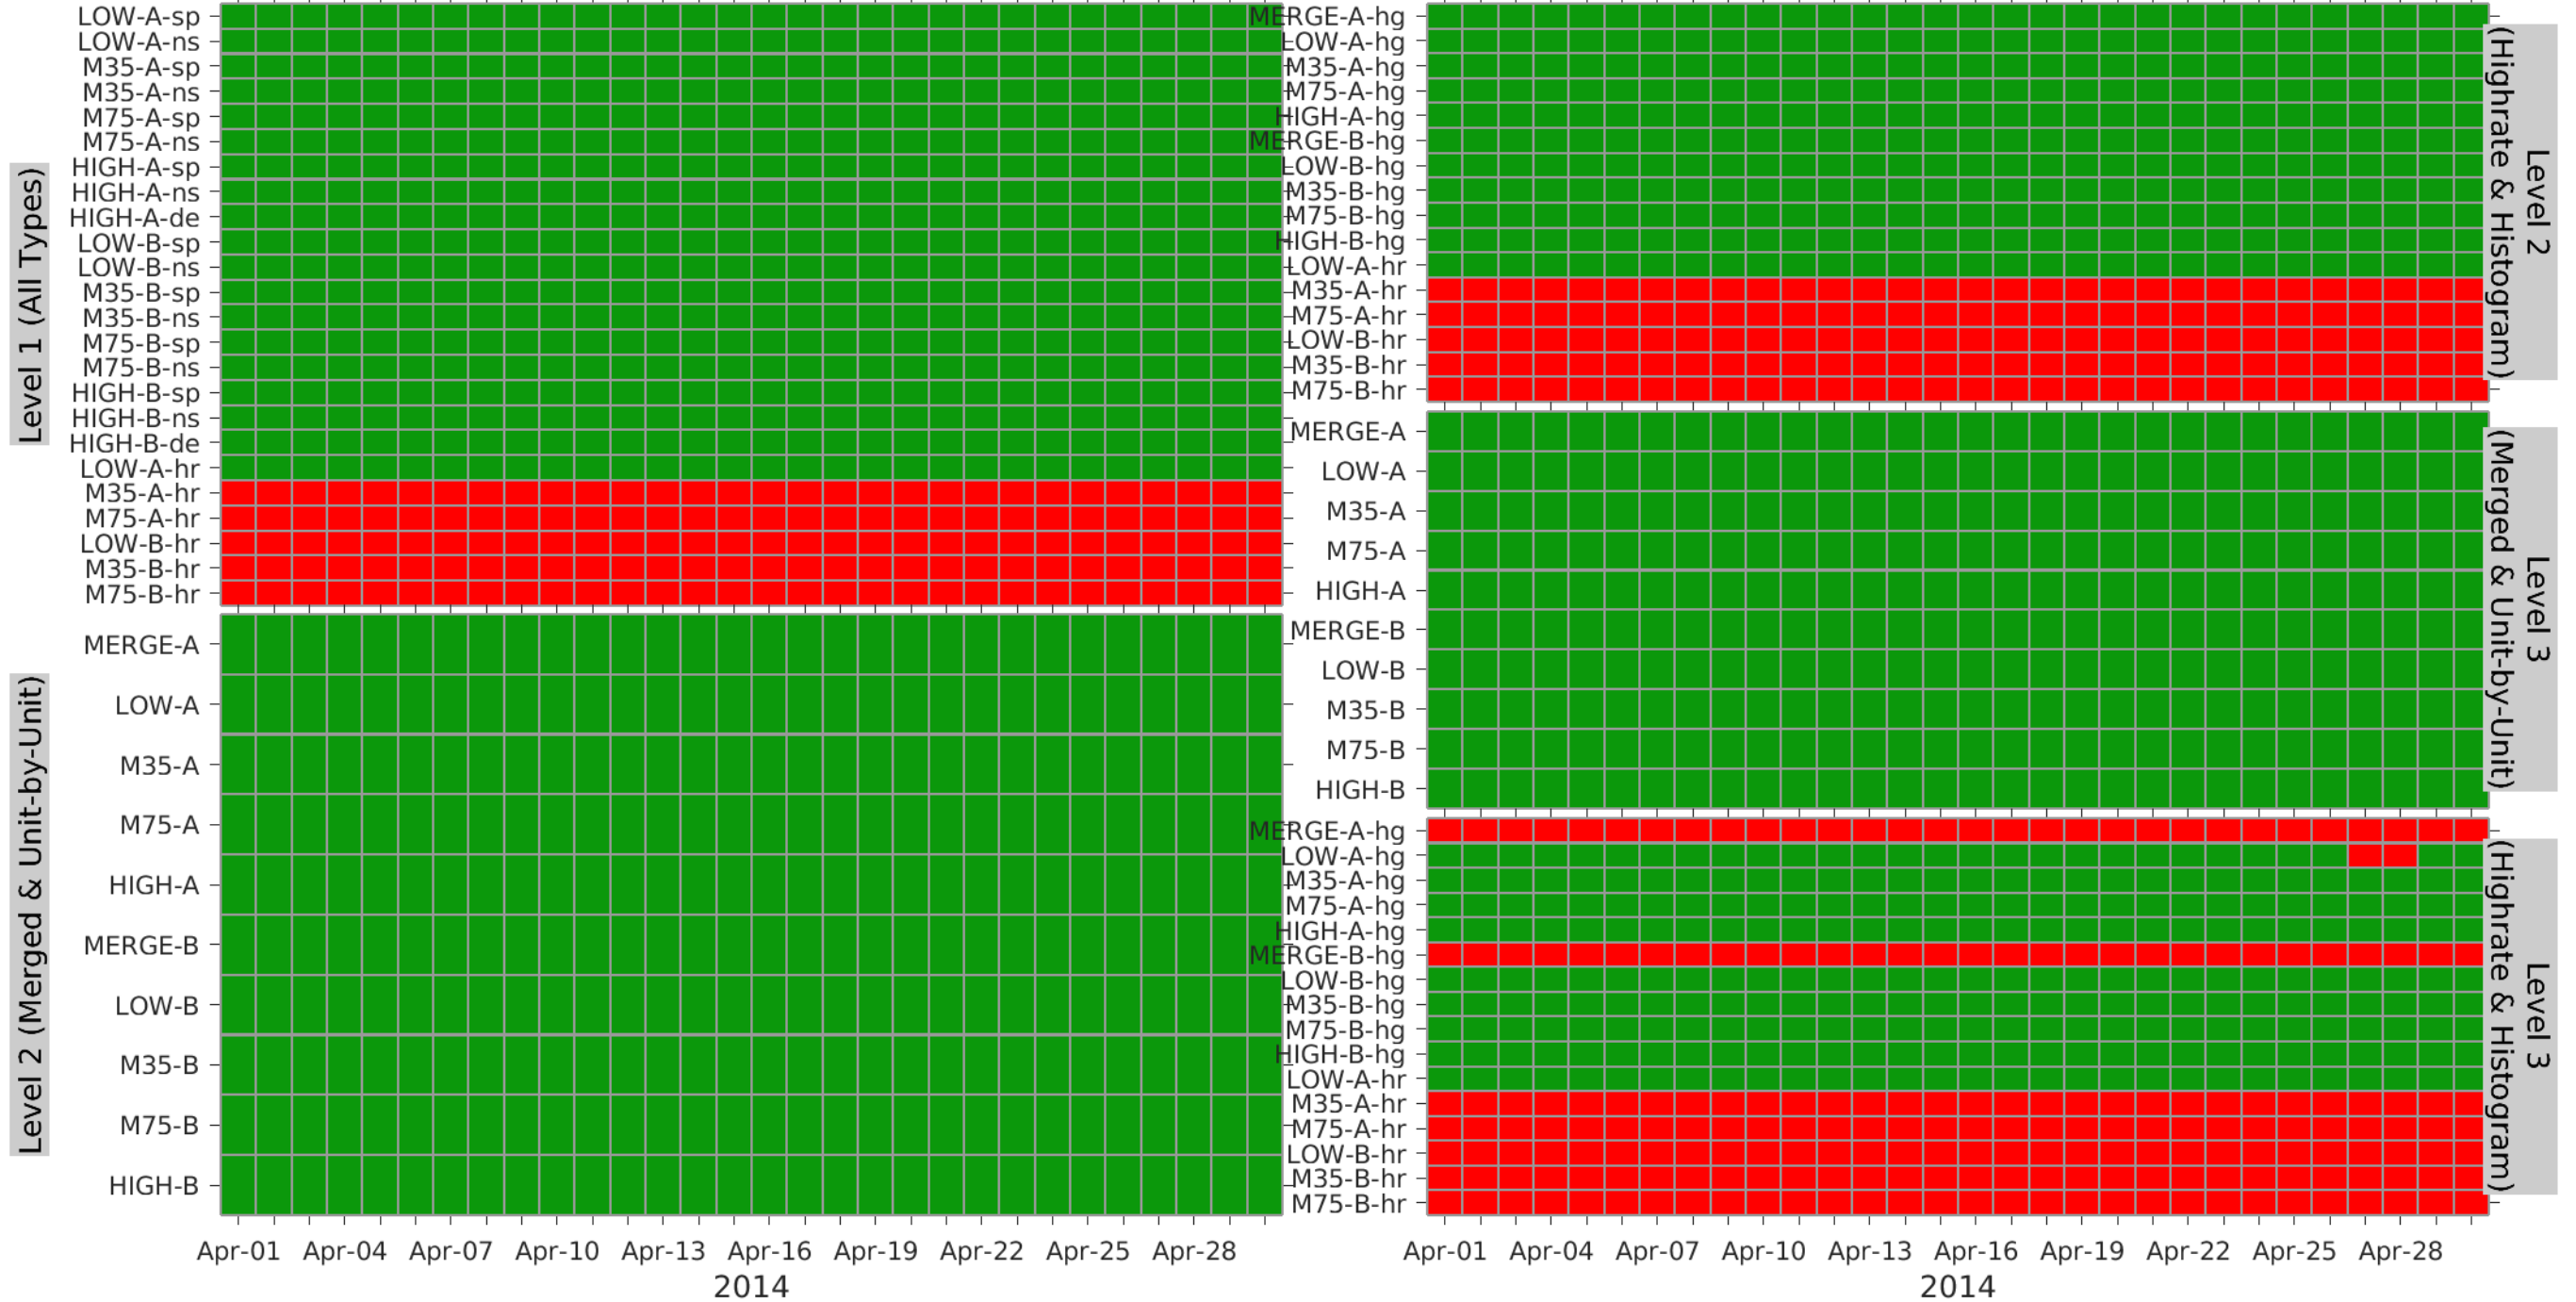

MagEIS Data Files | Created on: 2021/10/21 | Green = File Exists | Red = File Does Not Exist

sp=spin-based (science) | ns=non-science (housekeeping & status) | hr=highrate (LOW/MED only) | hg=histogram | de=direct event (HIGH only)

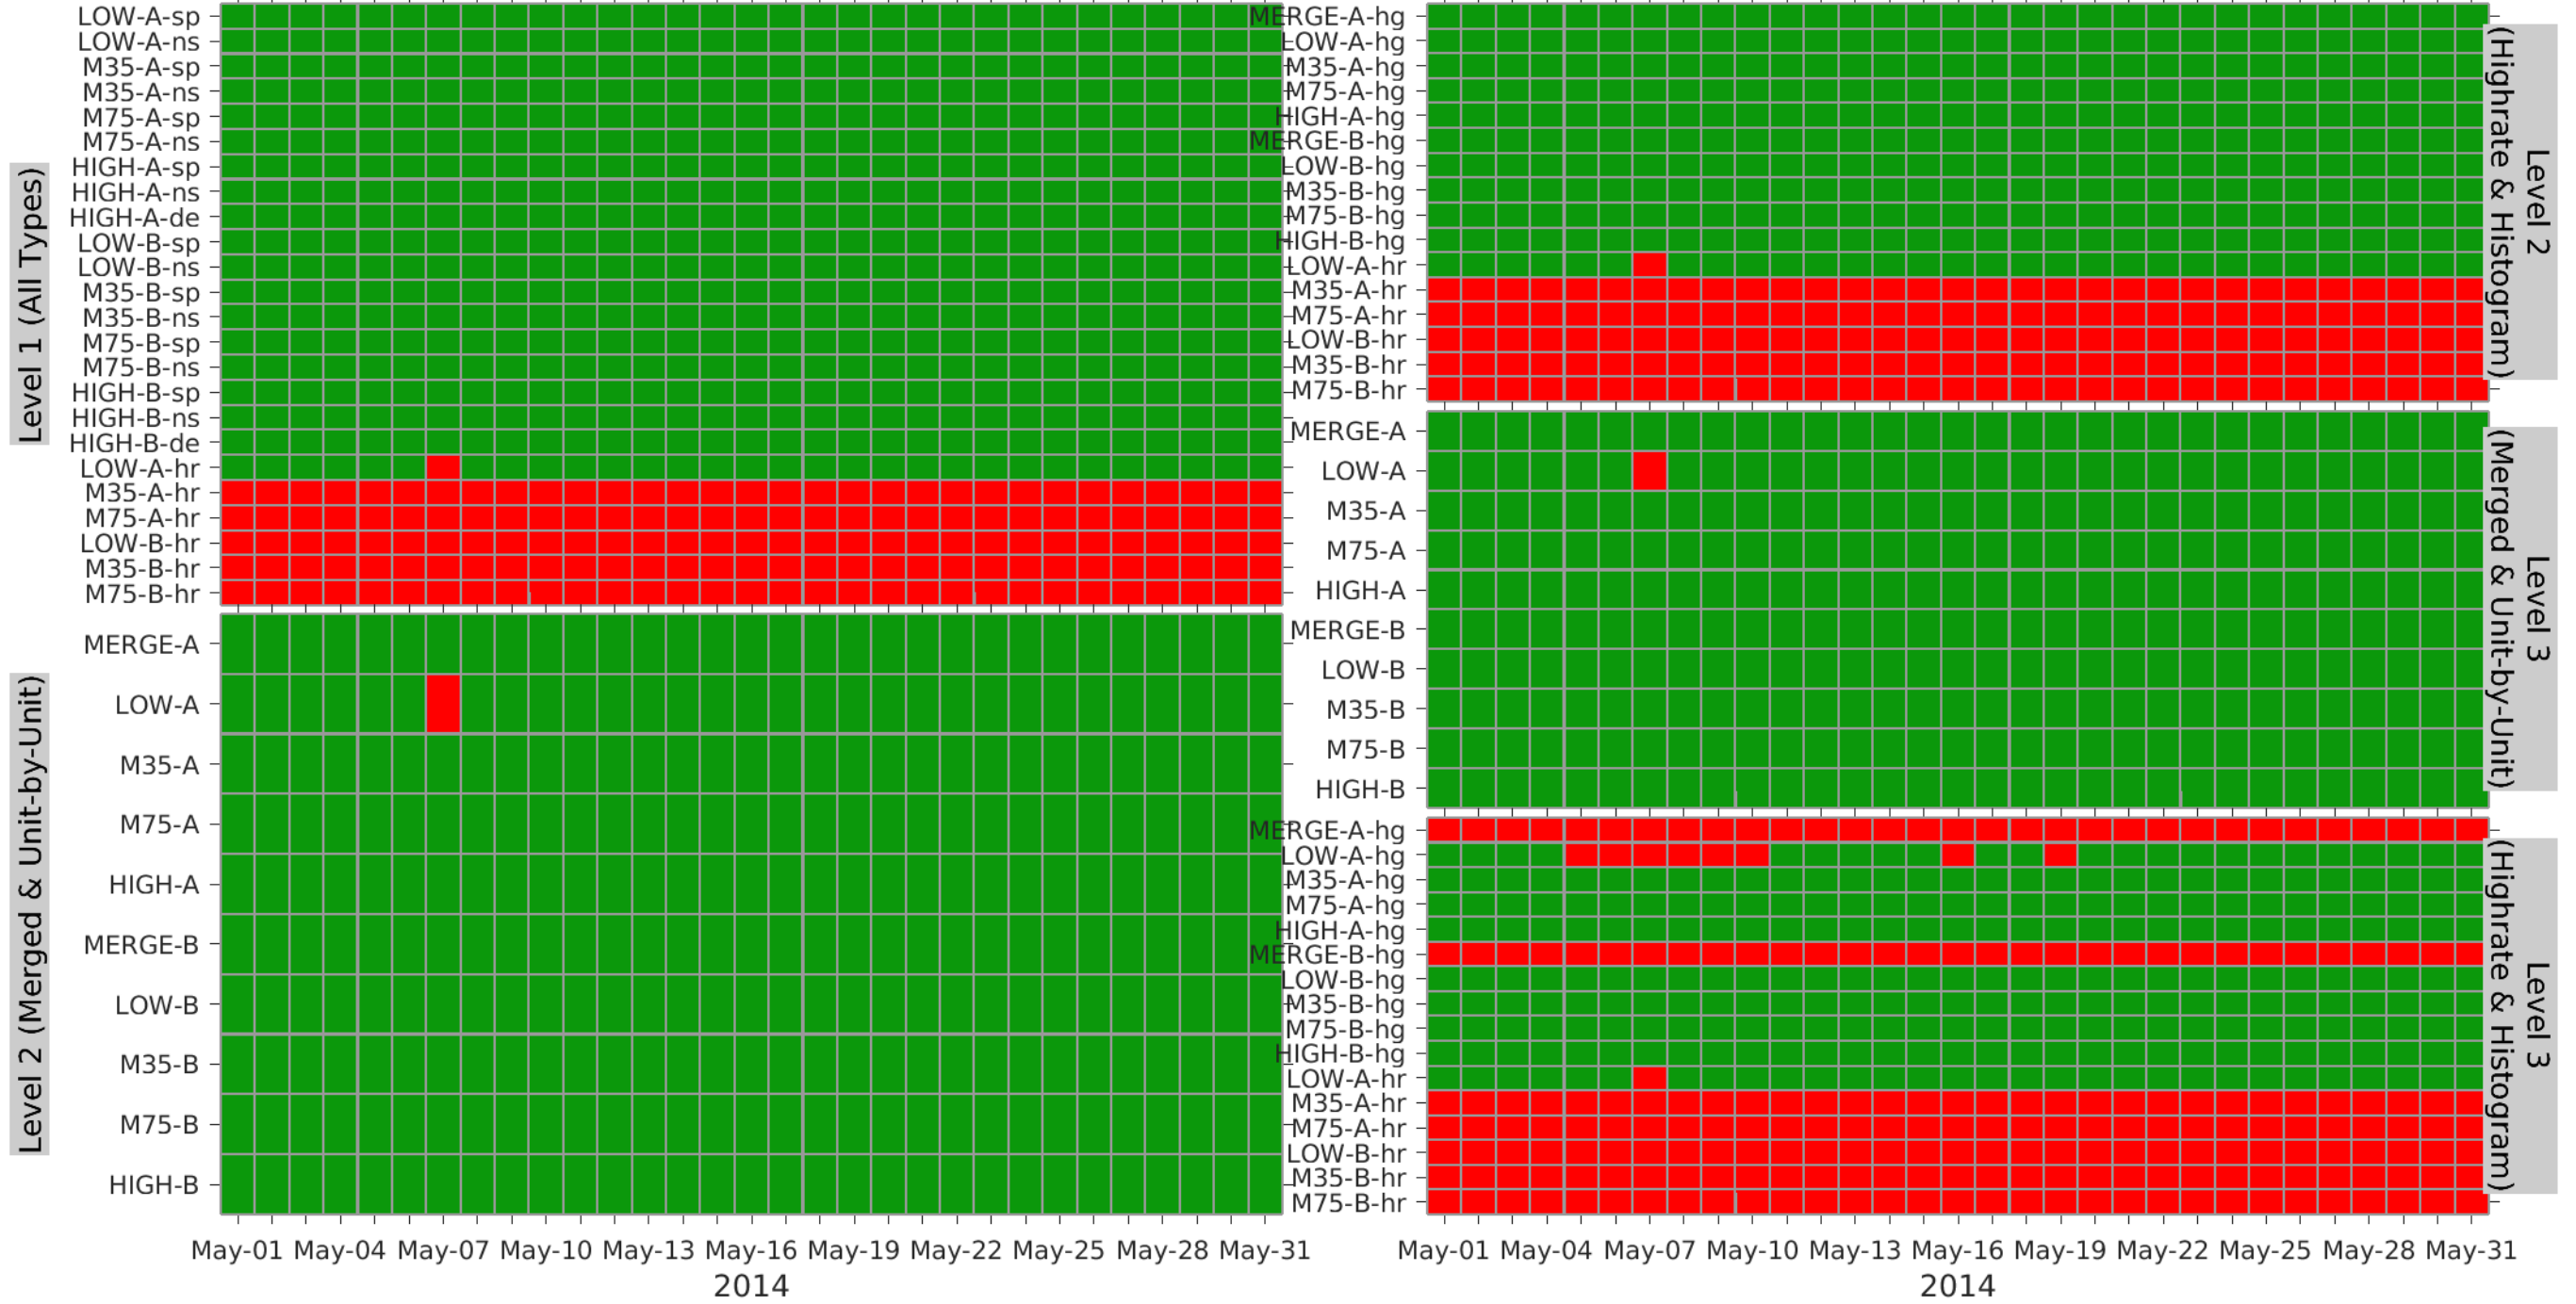

MagEIS Data Files | Created on: 2021/10/21 | Green = File Exists | Red = File Does Not Exist

sp=spin-based (science) | ns=non-science (housekeeping & status) | hr=highrate (LOW/MED only) | hg=histogram | de=direct event (HIGH only)

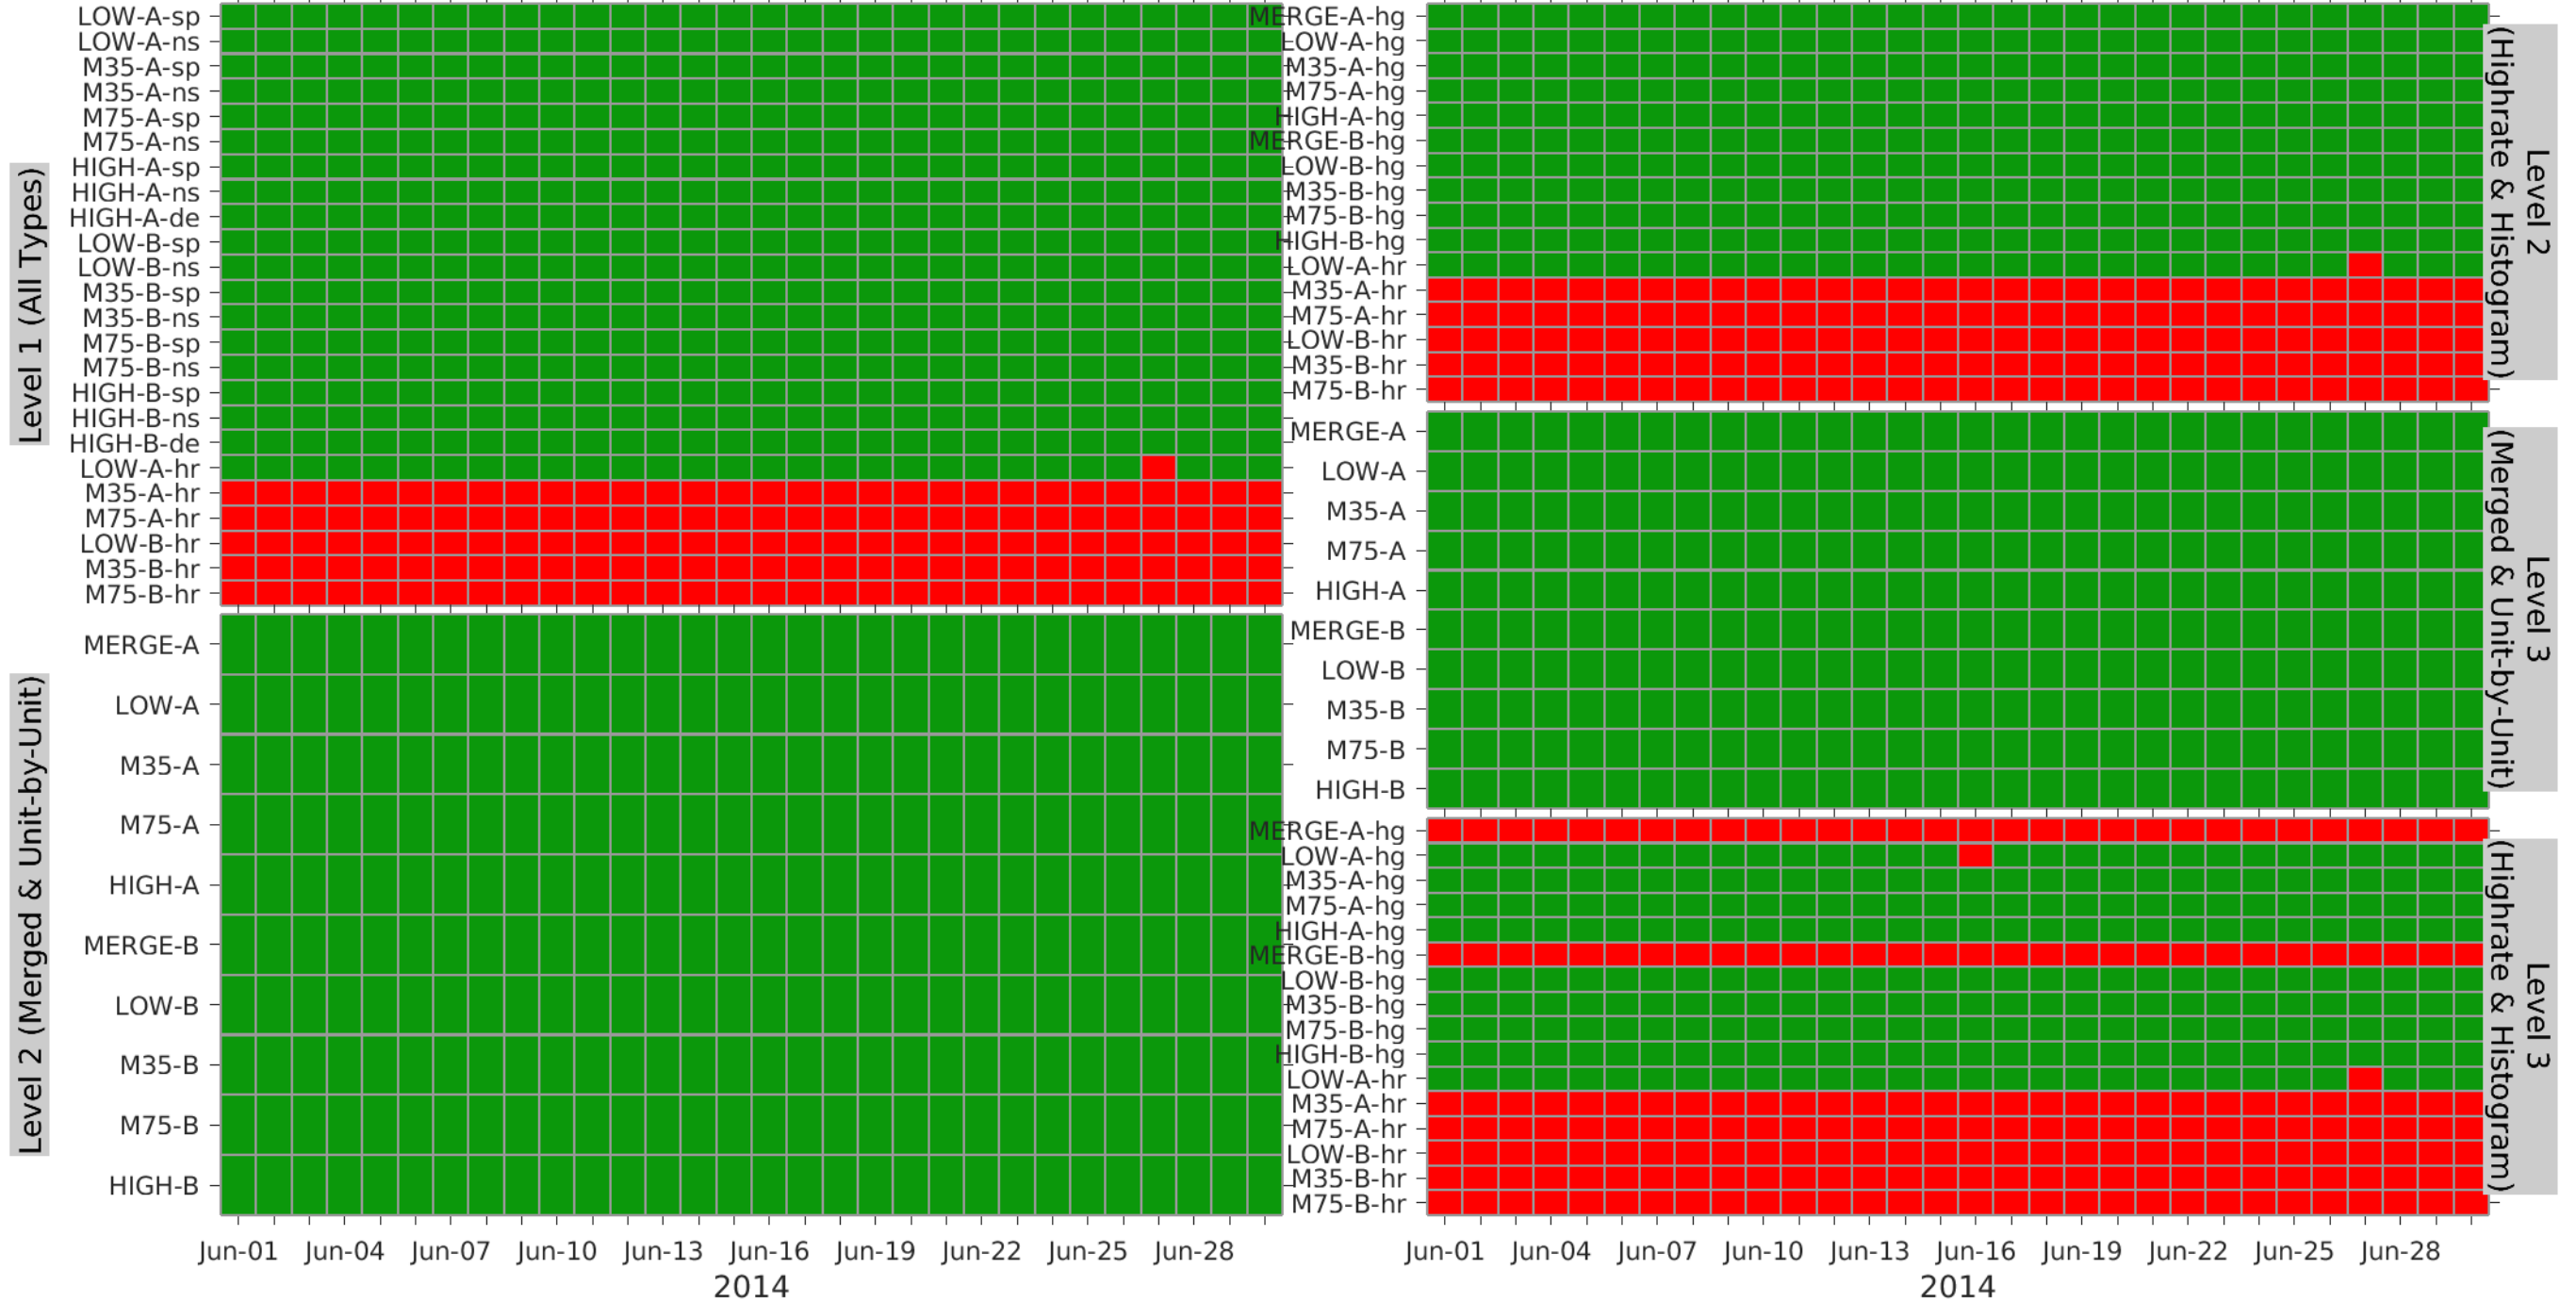

MagEIS Data Files | Created on: 2021/10/21 | Green = File Exists | Red = File Does Not Exist

sp=spin-based (science) | ns=non-science (housekeeping & status) | hr=highrate (LOW/MED only) | hg=histogram | de=direct event (HIGH only)

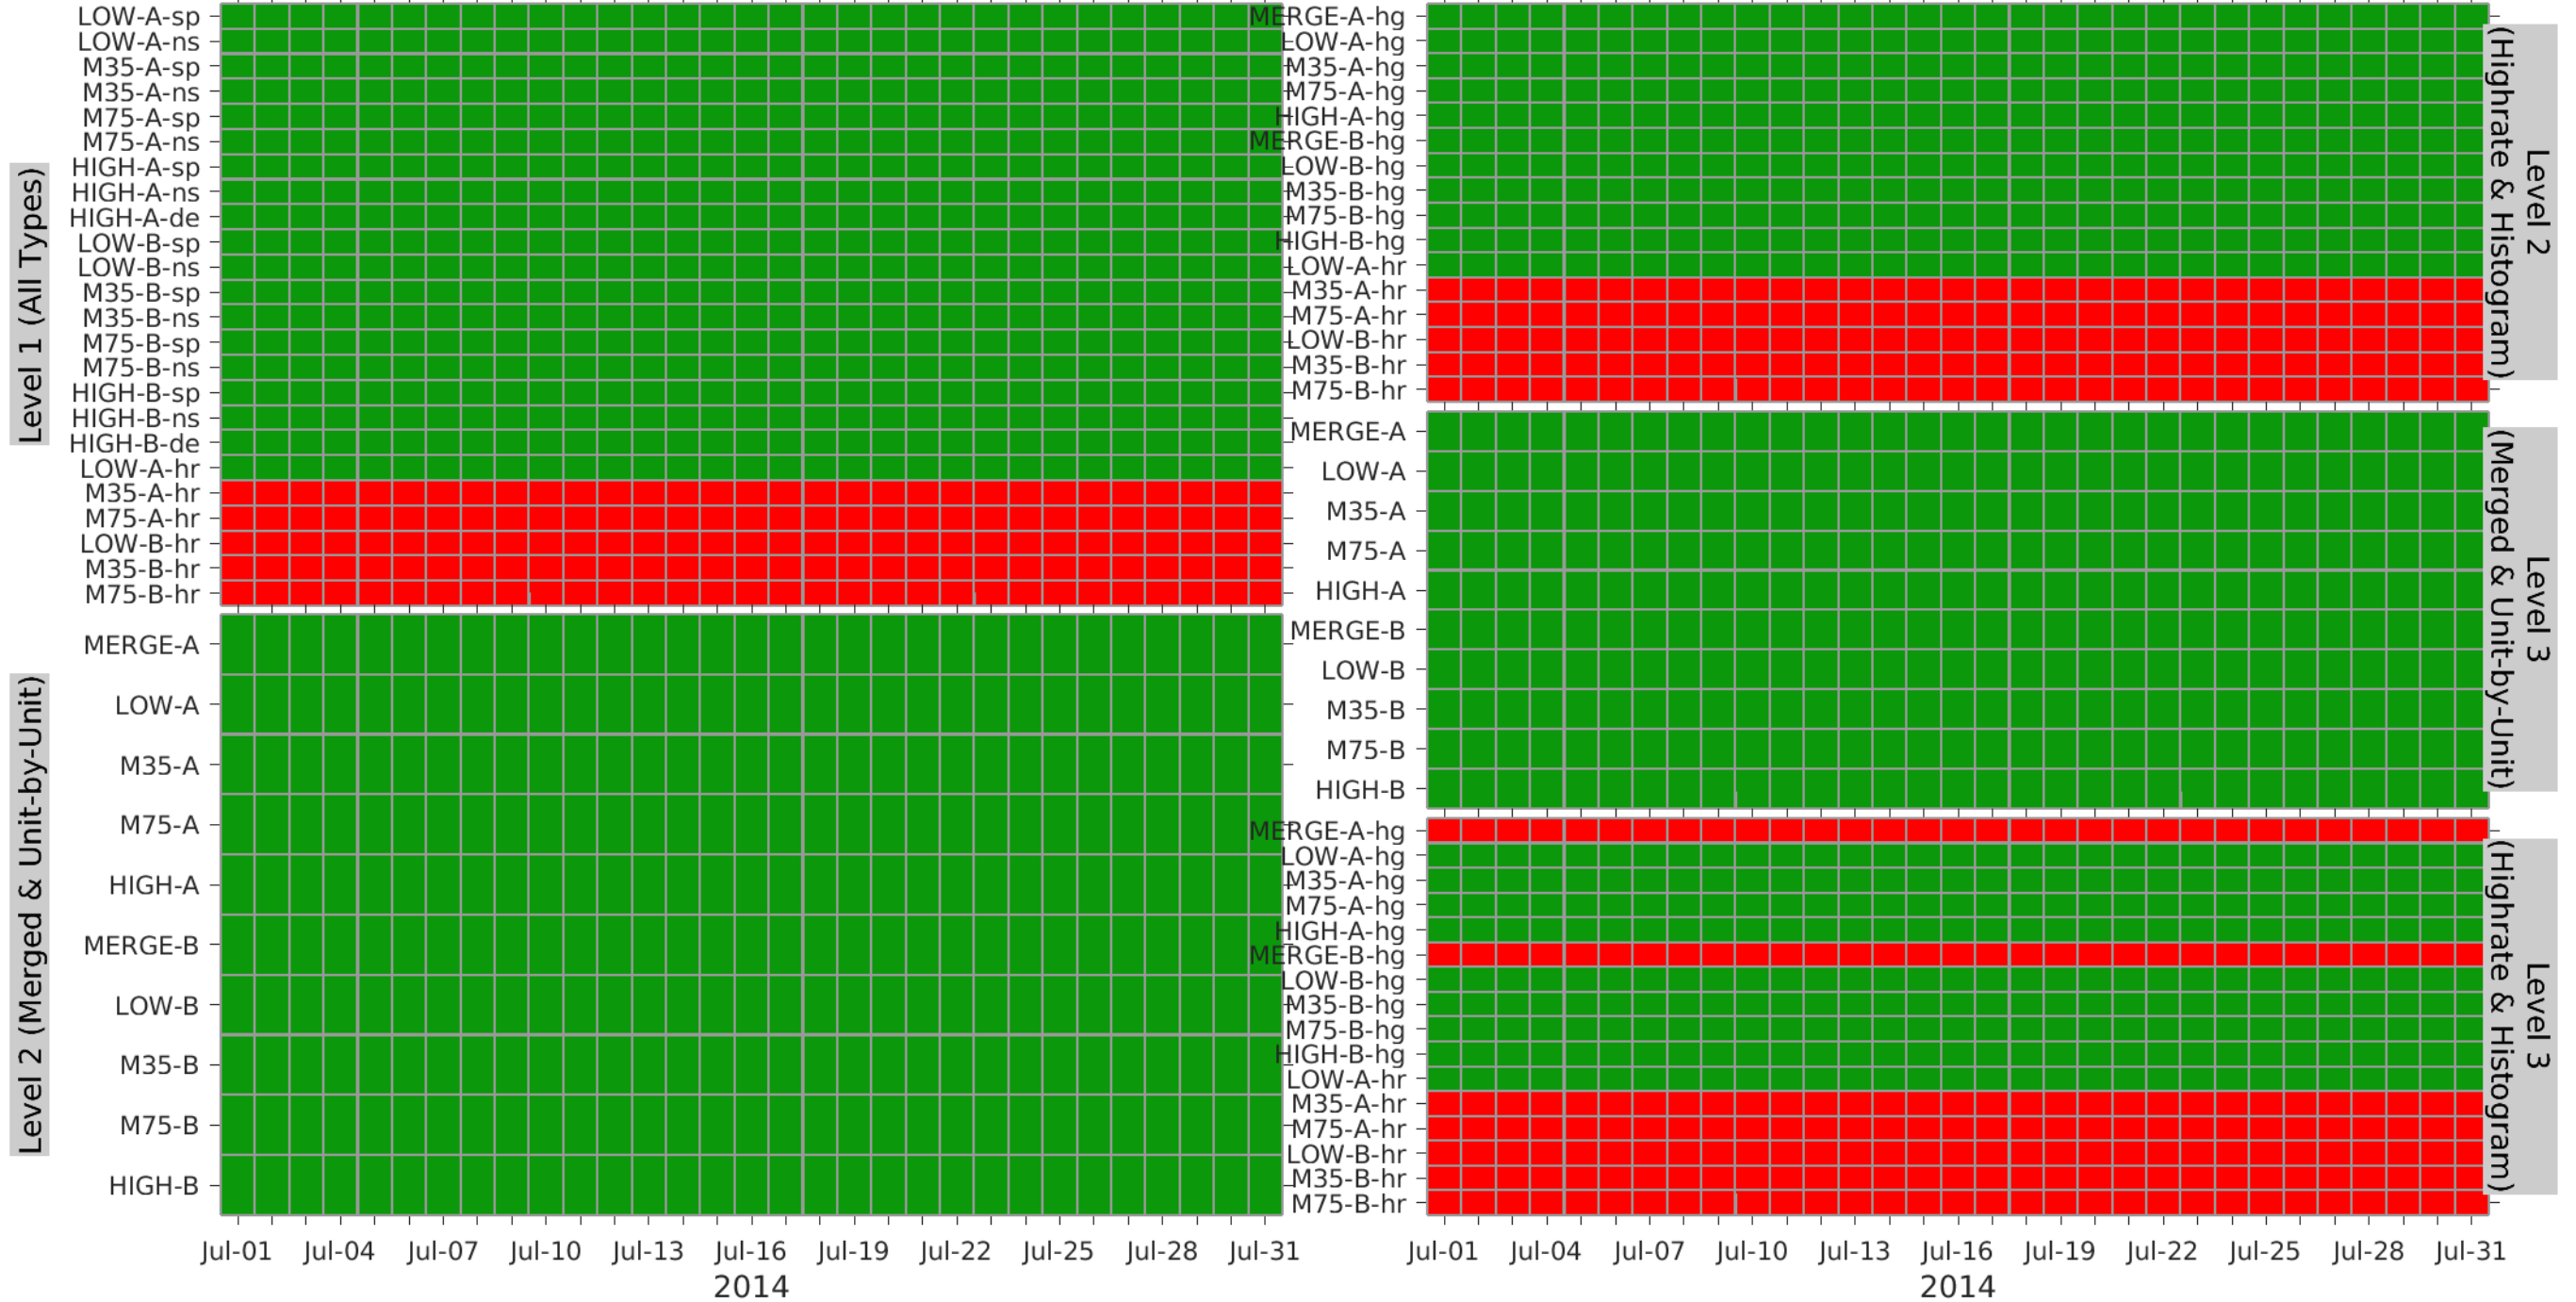



MagEIS Data Files | Created on: 2021/10/21 | Green = File Exists | Red = File Does Not Exist

sp=spin-based (science) | ns=non-science (housekeeping & status) | hr=highrate (LOW/MED only) | hg=histogram | de=direct event (HIGH only)

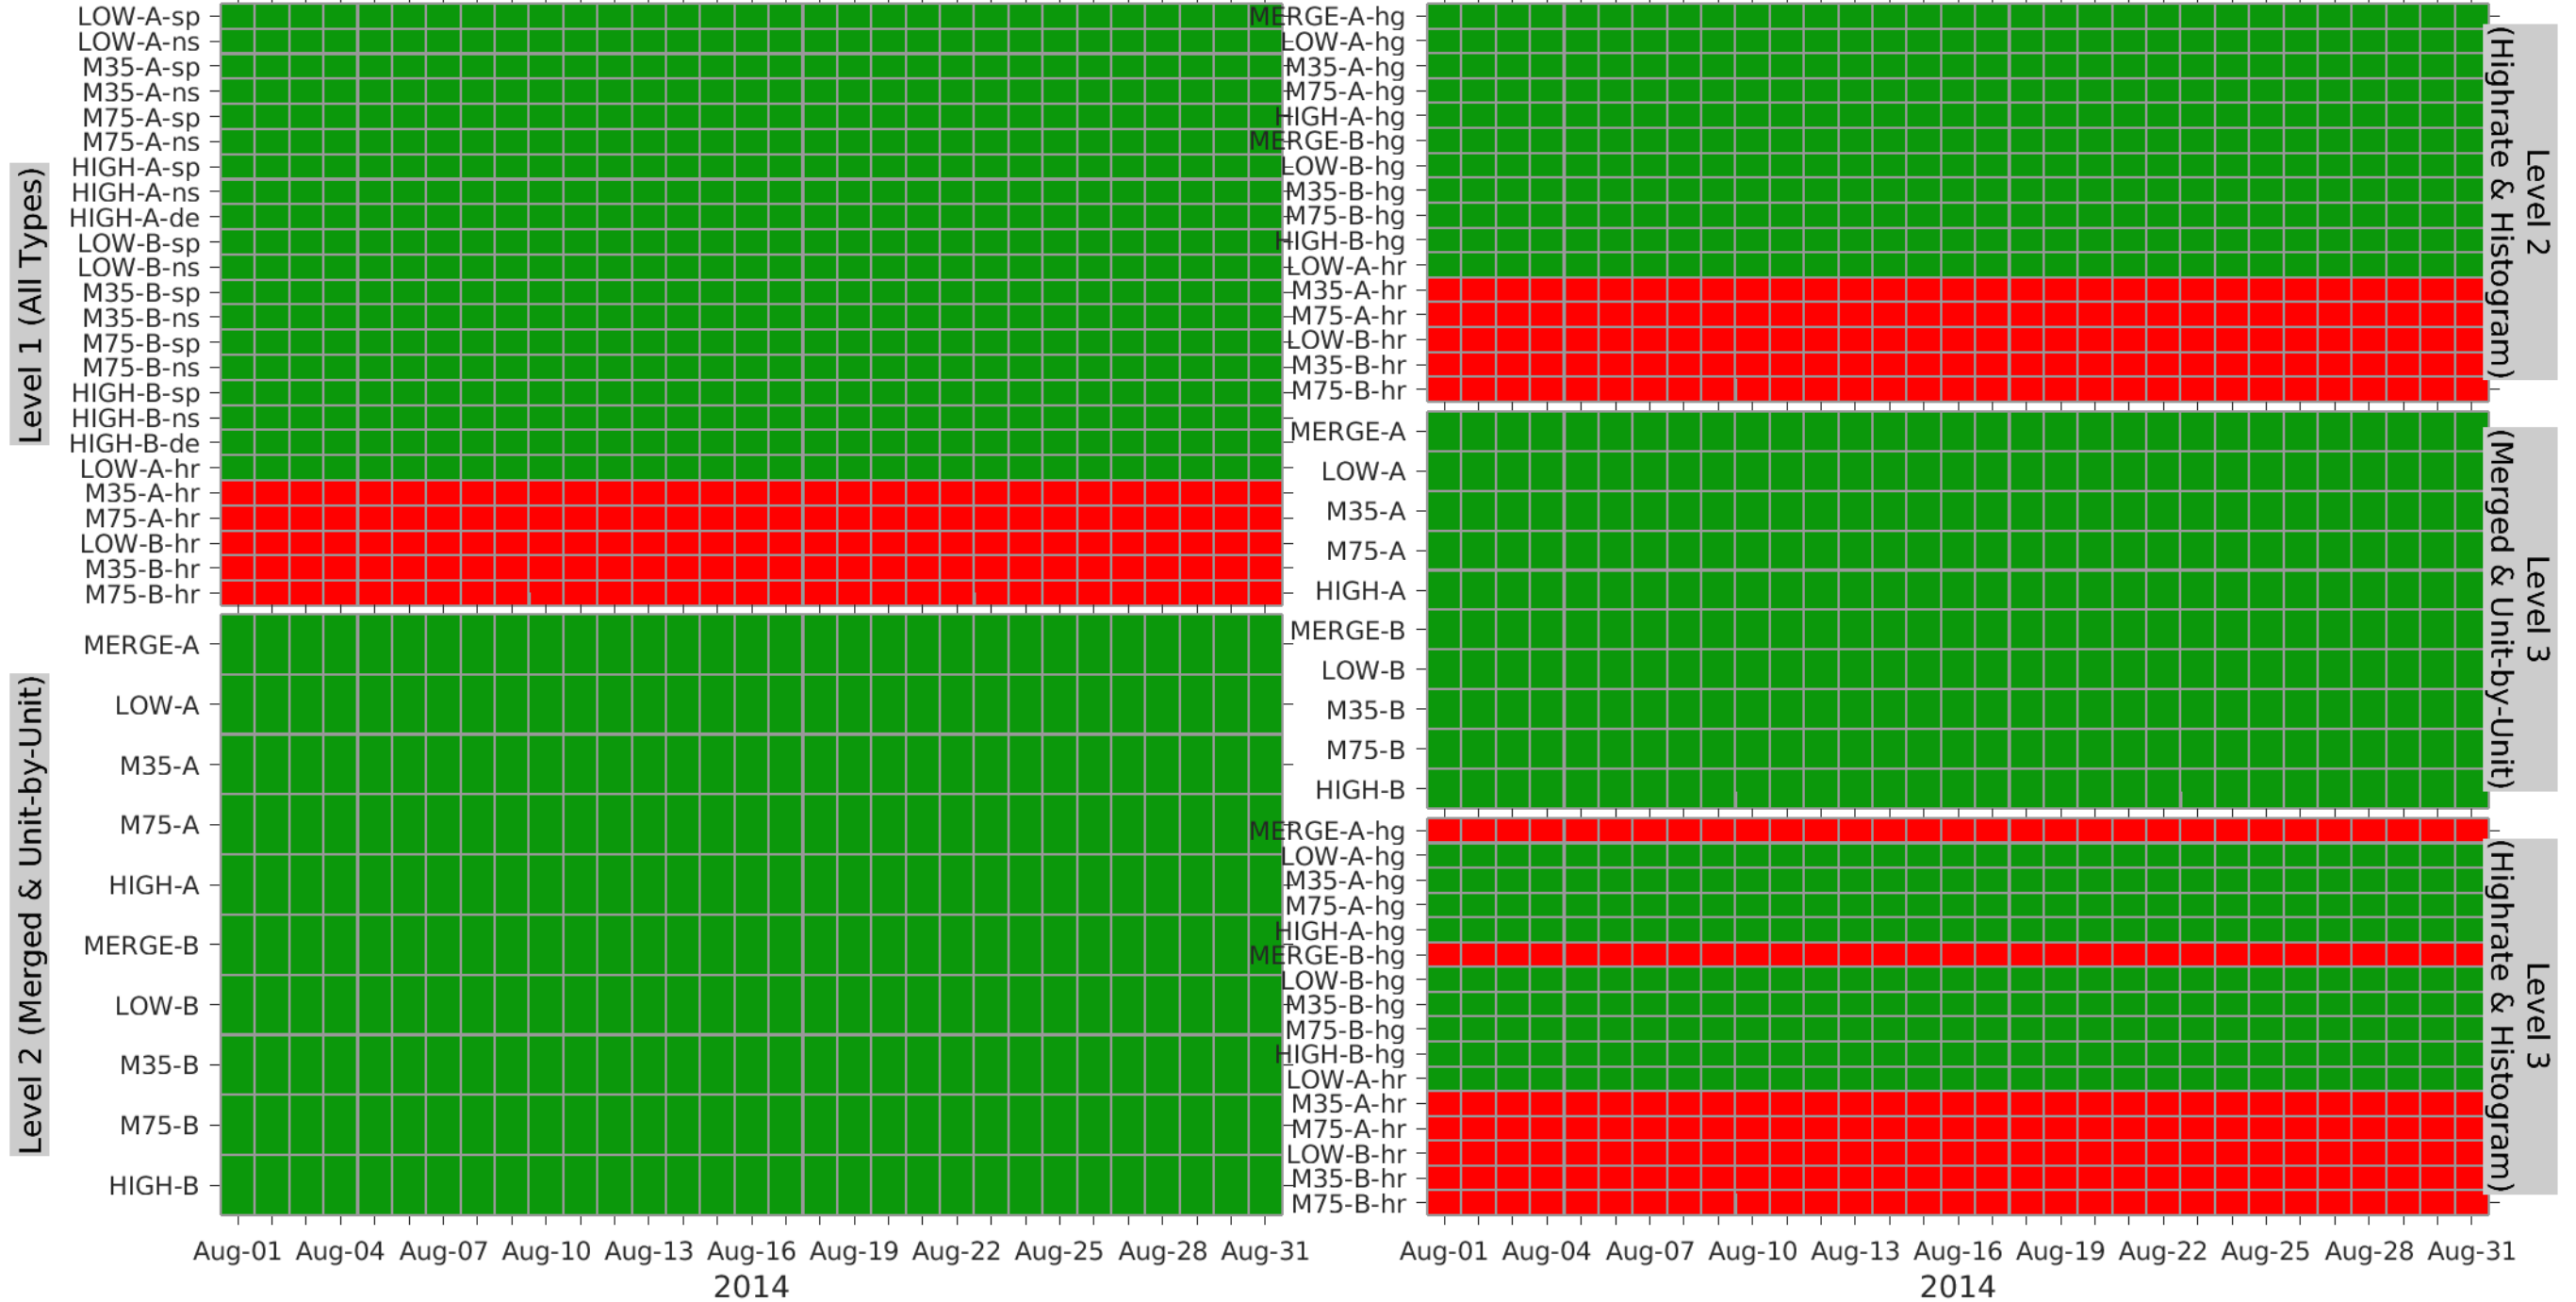

MagEIS Data Files | Created on: 2021/10/21 | Green = File Exists | Red = File Does Not Exist

sp=spin-based (science) | ns=non-science (housekeeping & status) | hr=highrate (LOW/MED only) | hg=histogram | de=direct event (HIGH only)

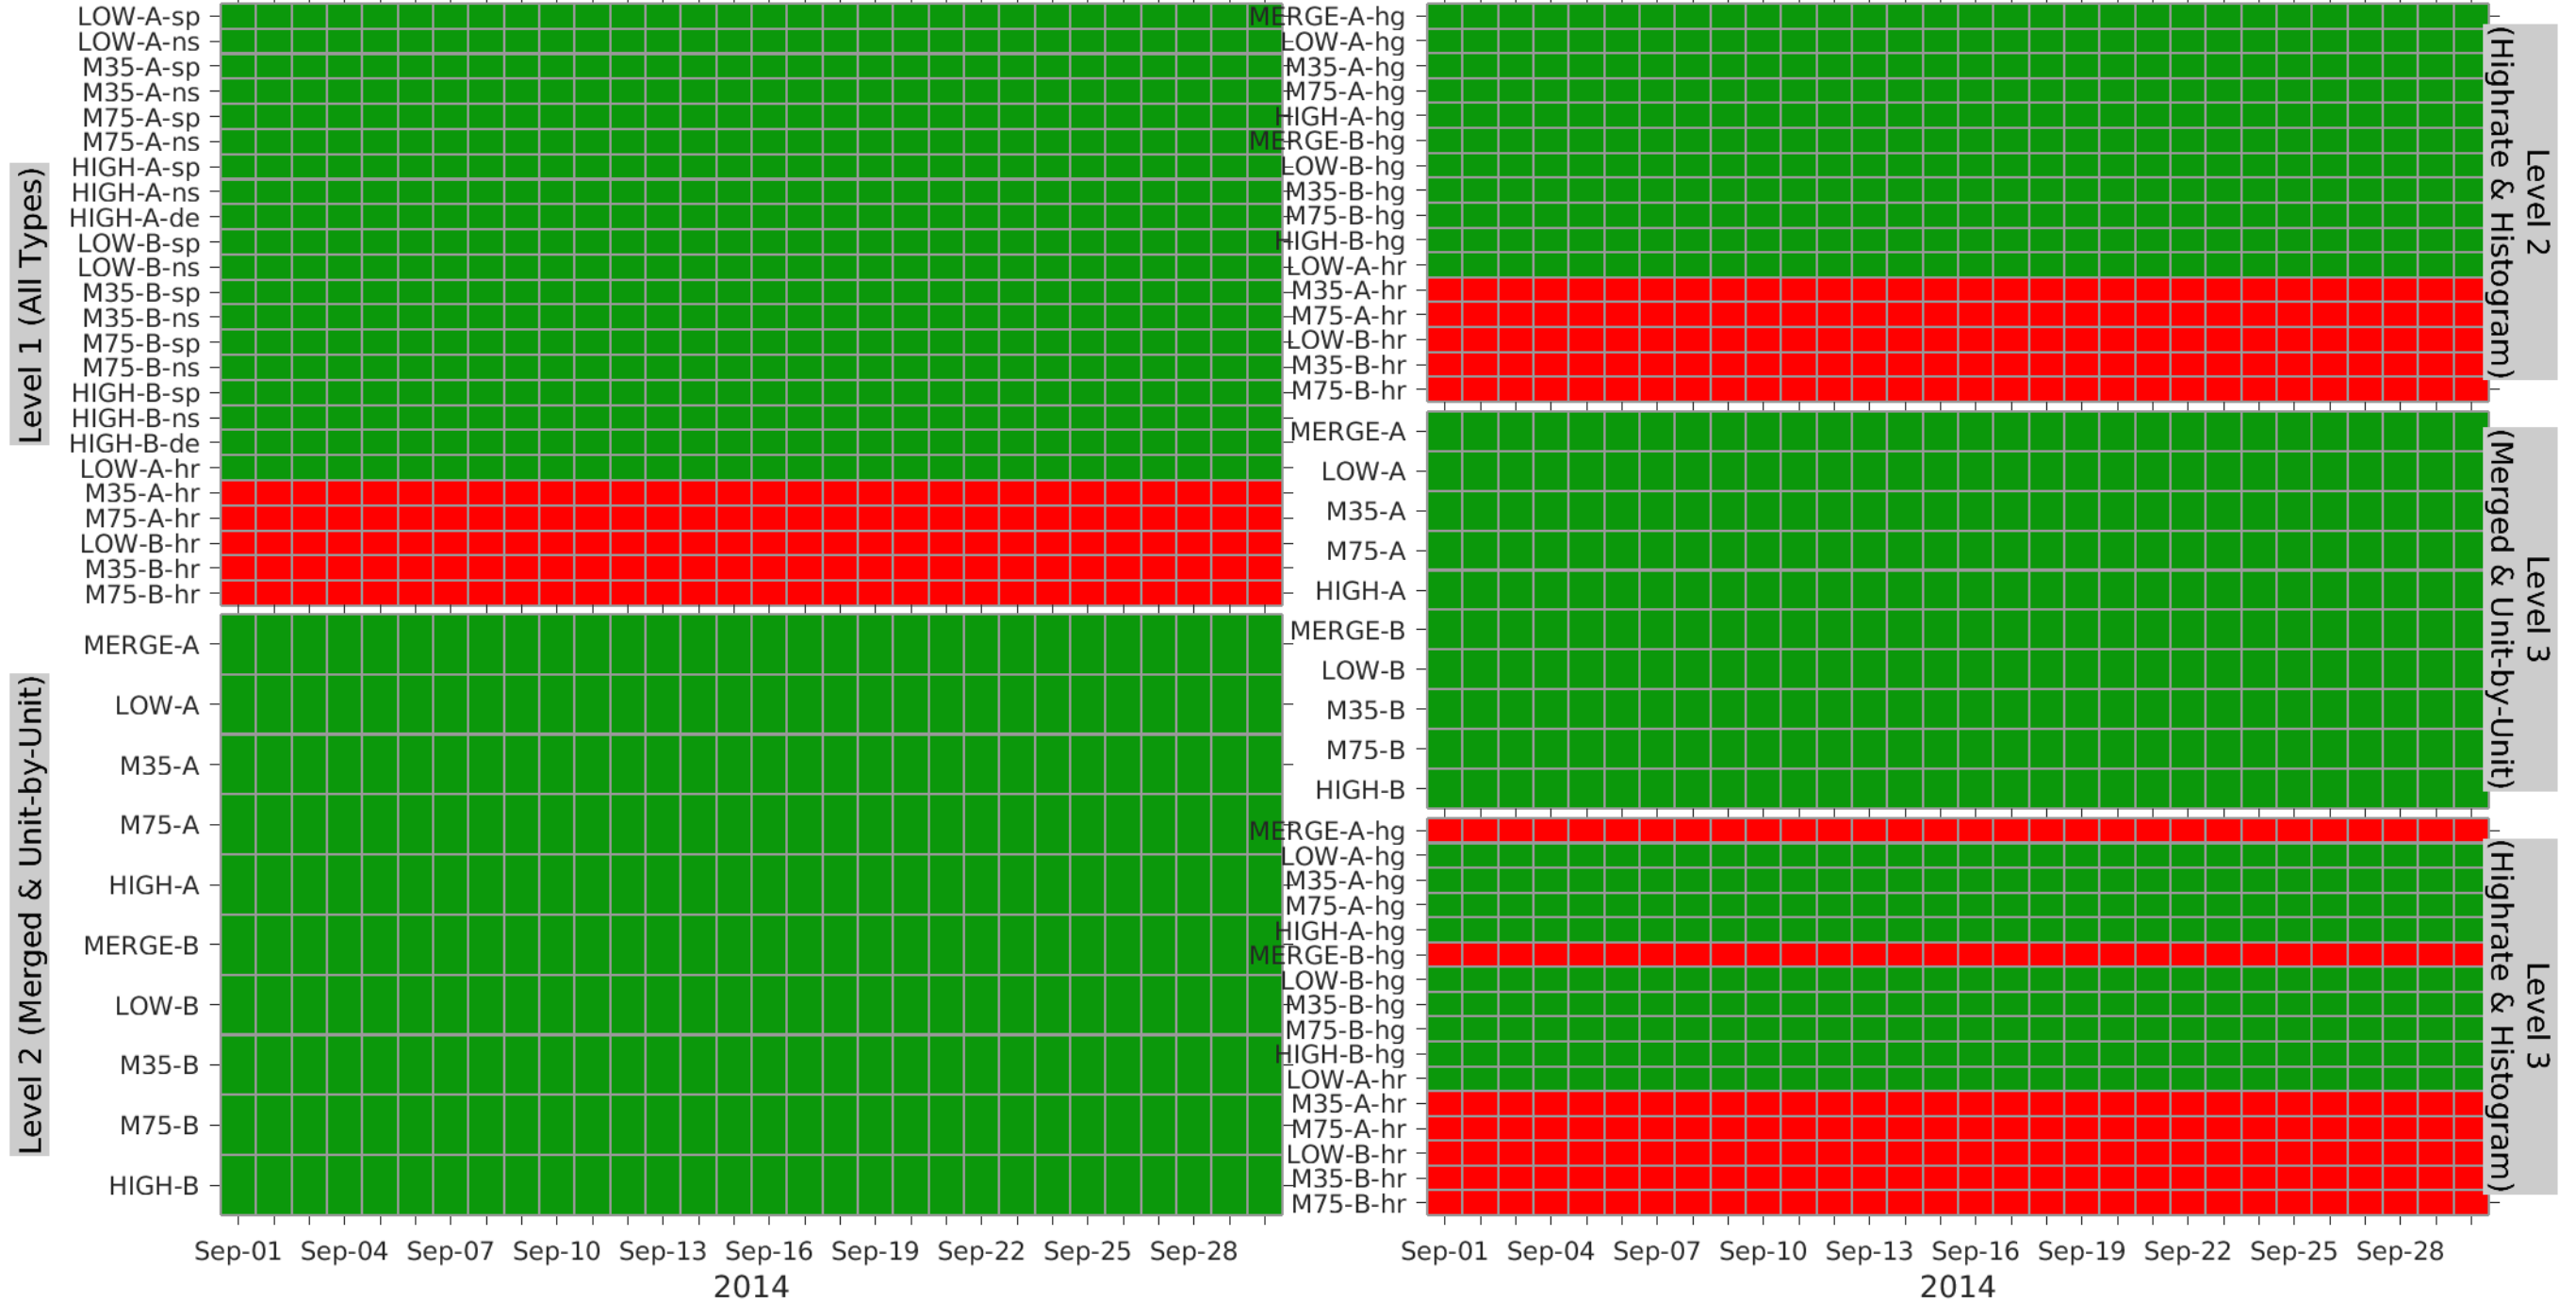

MagEIS Data Files | Created on: 2021/10/21 | Green = File Exists | Red = File Does Not Exist

sp=spin-based (science) | ns=non-science (housekeeping & status) | hr=highrate (LOW/MED only) | hg=histogram | de=direct event (HIGH only)

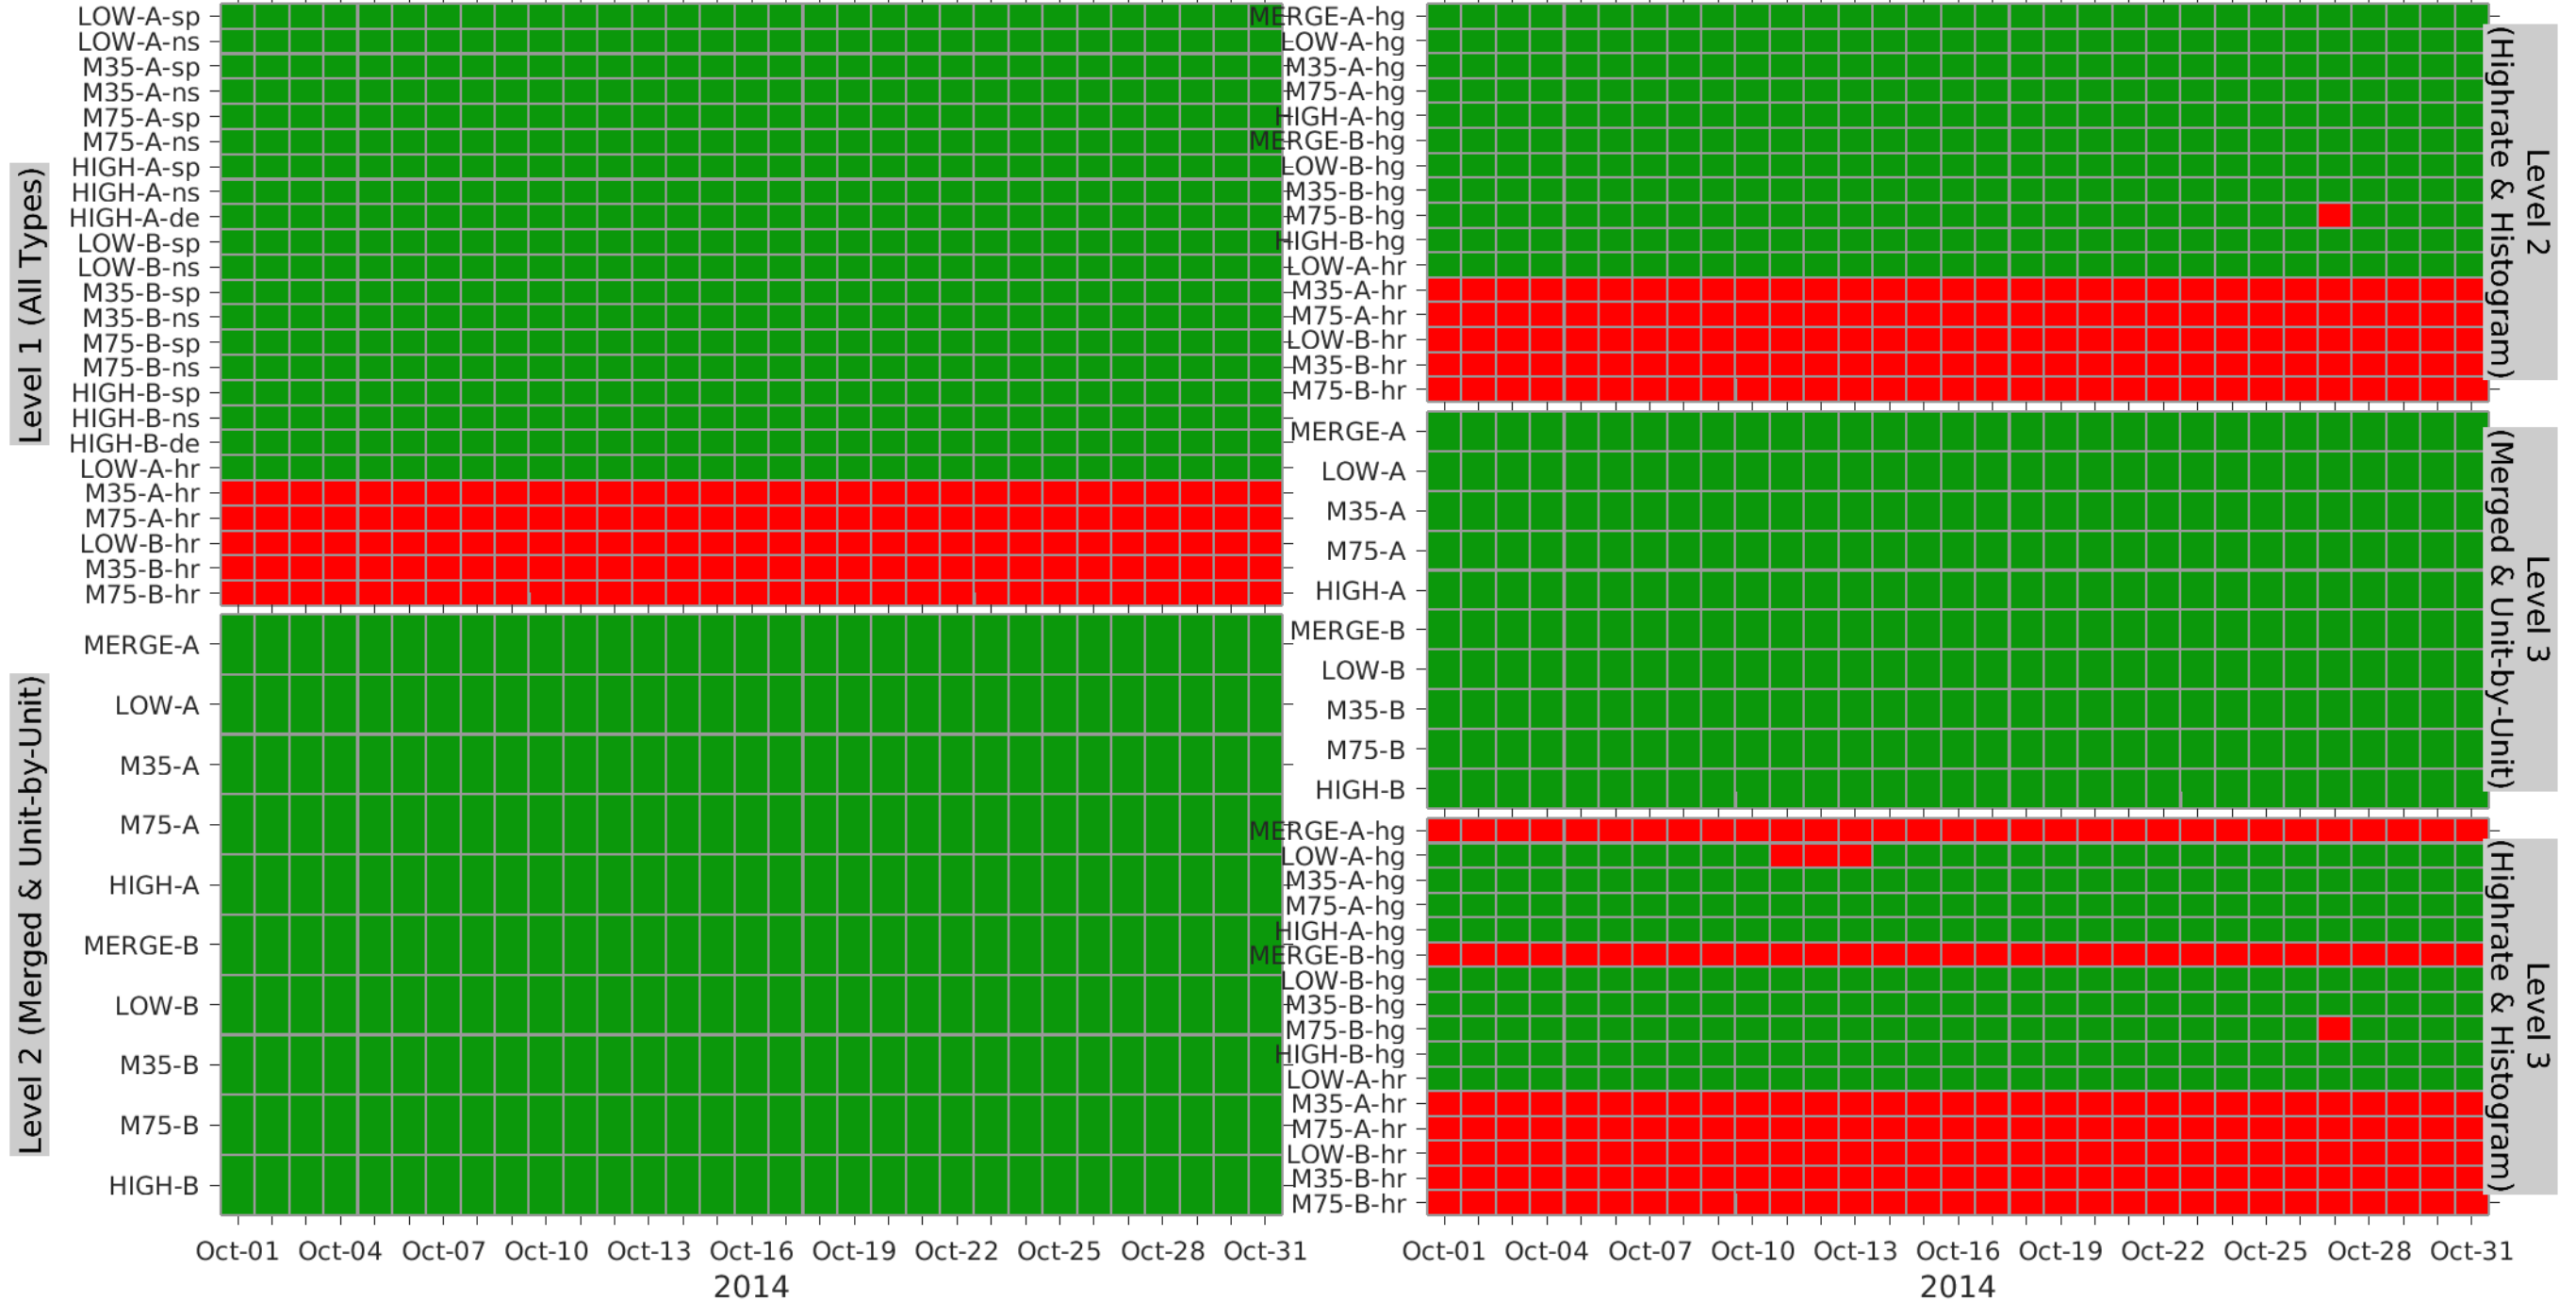

MagEIS Data Files | Created on: 2021/10/21 | Green = File Exists | Red = File Does Not Exist

sp=spin-based (science) | ns=non-science (housekeeping & status) | hr=highrate (LOW/MED only) | hg=histogram | de=direct event (HIGH only)

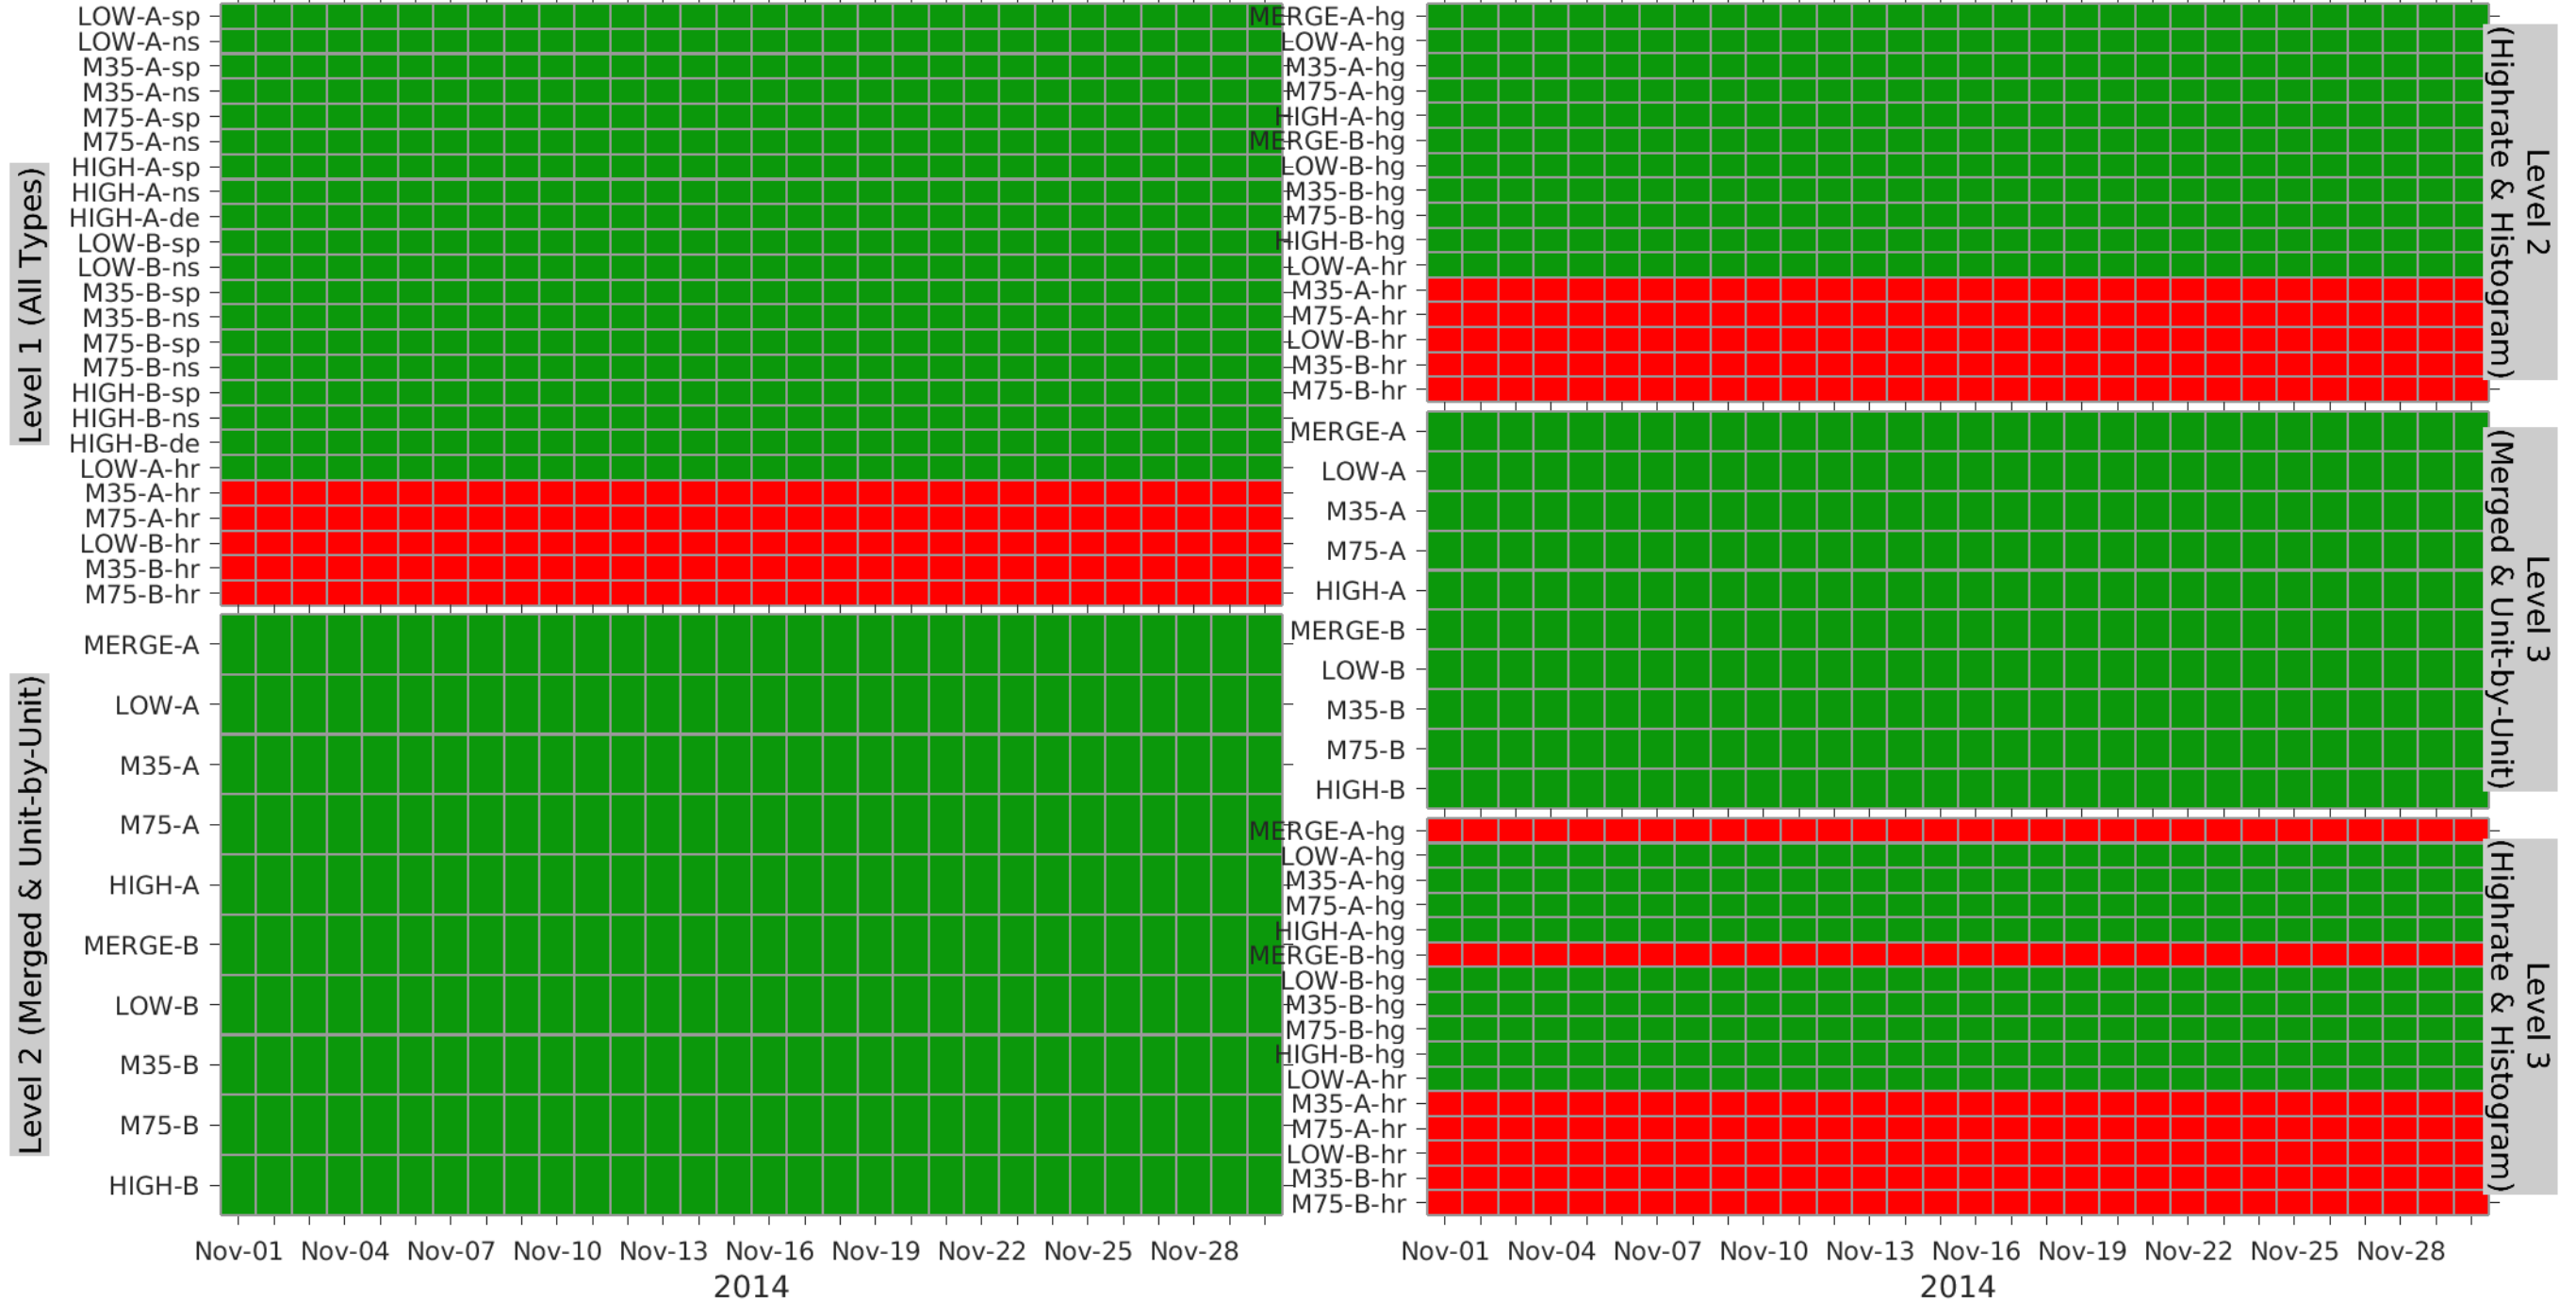

MagEIS Data Files | Created on: 2021/10/21 | Green = File Exists | Red = File Does Not Exist

sp=spin-based (science) | ns=non-science (housekeeping & status) | hr=highrate (LOW/MED only) | hg=histogram | de=direct event (HIGH only)

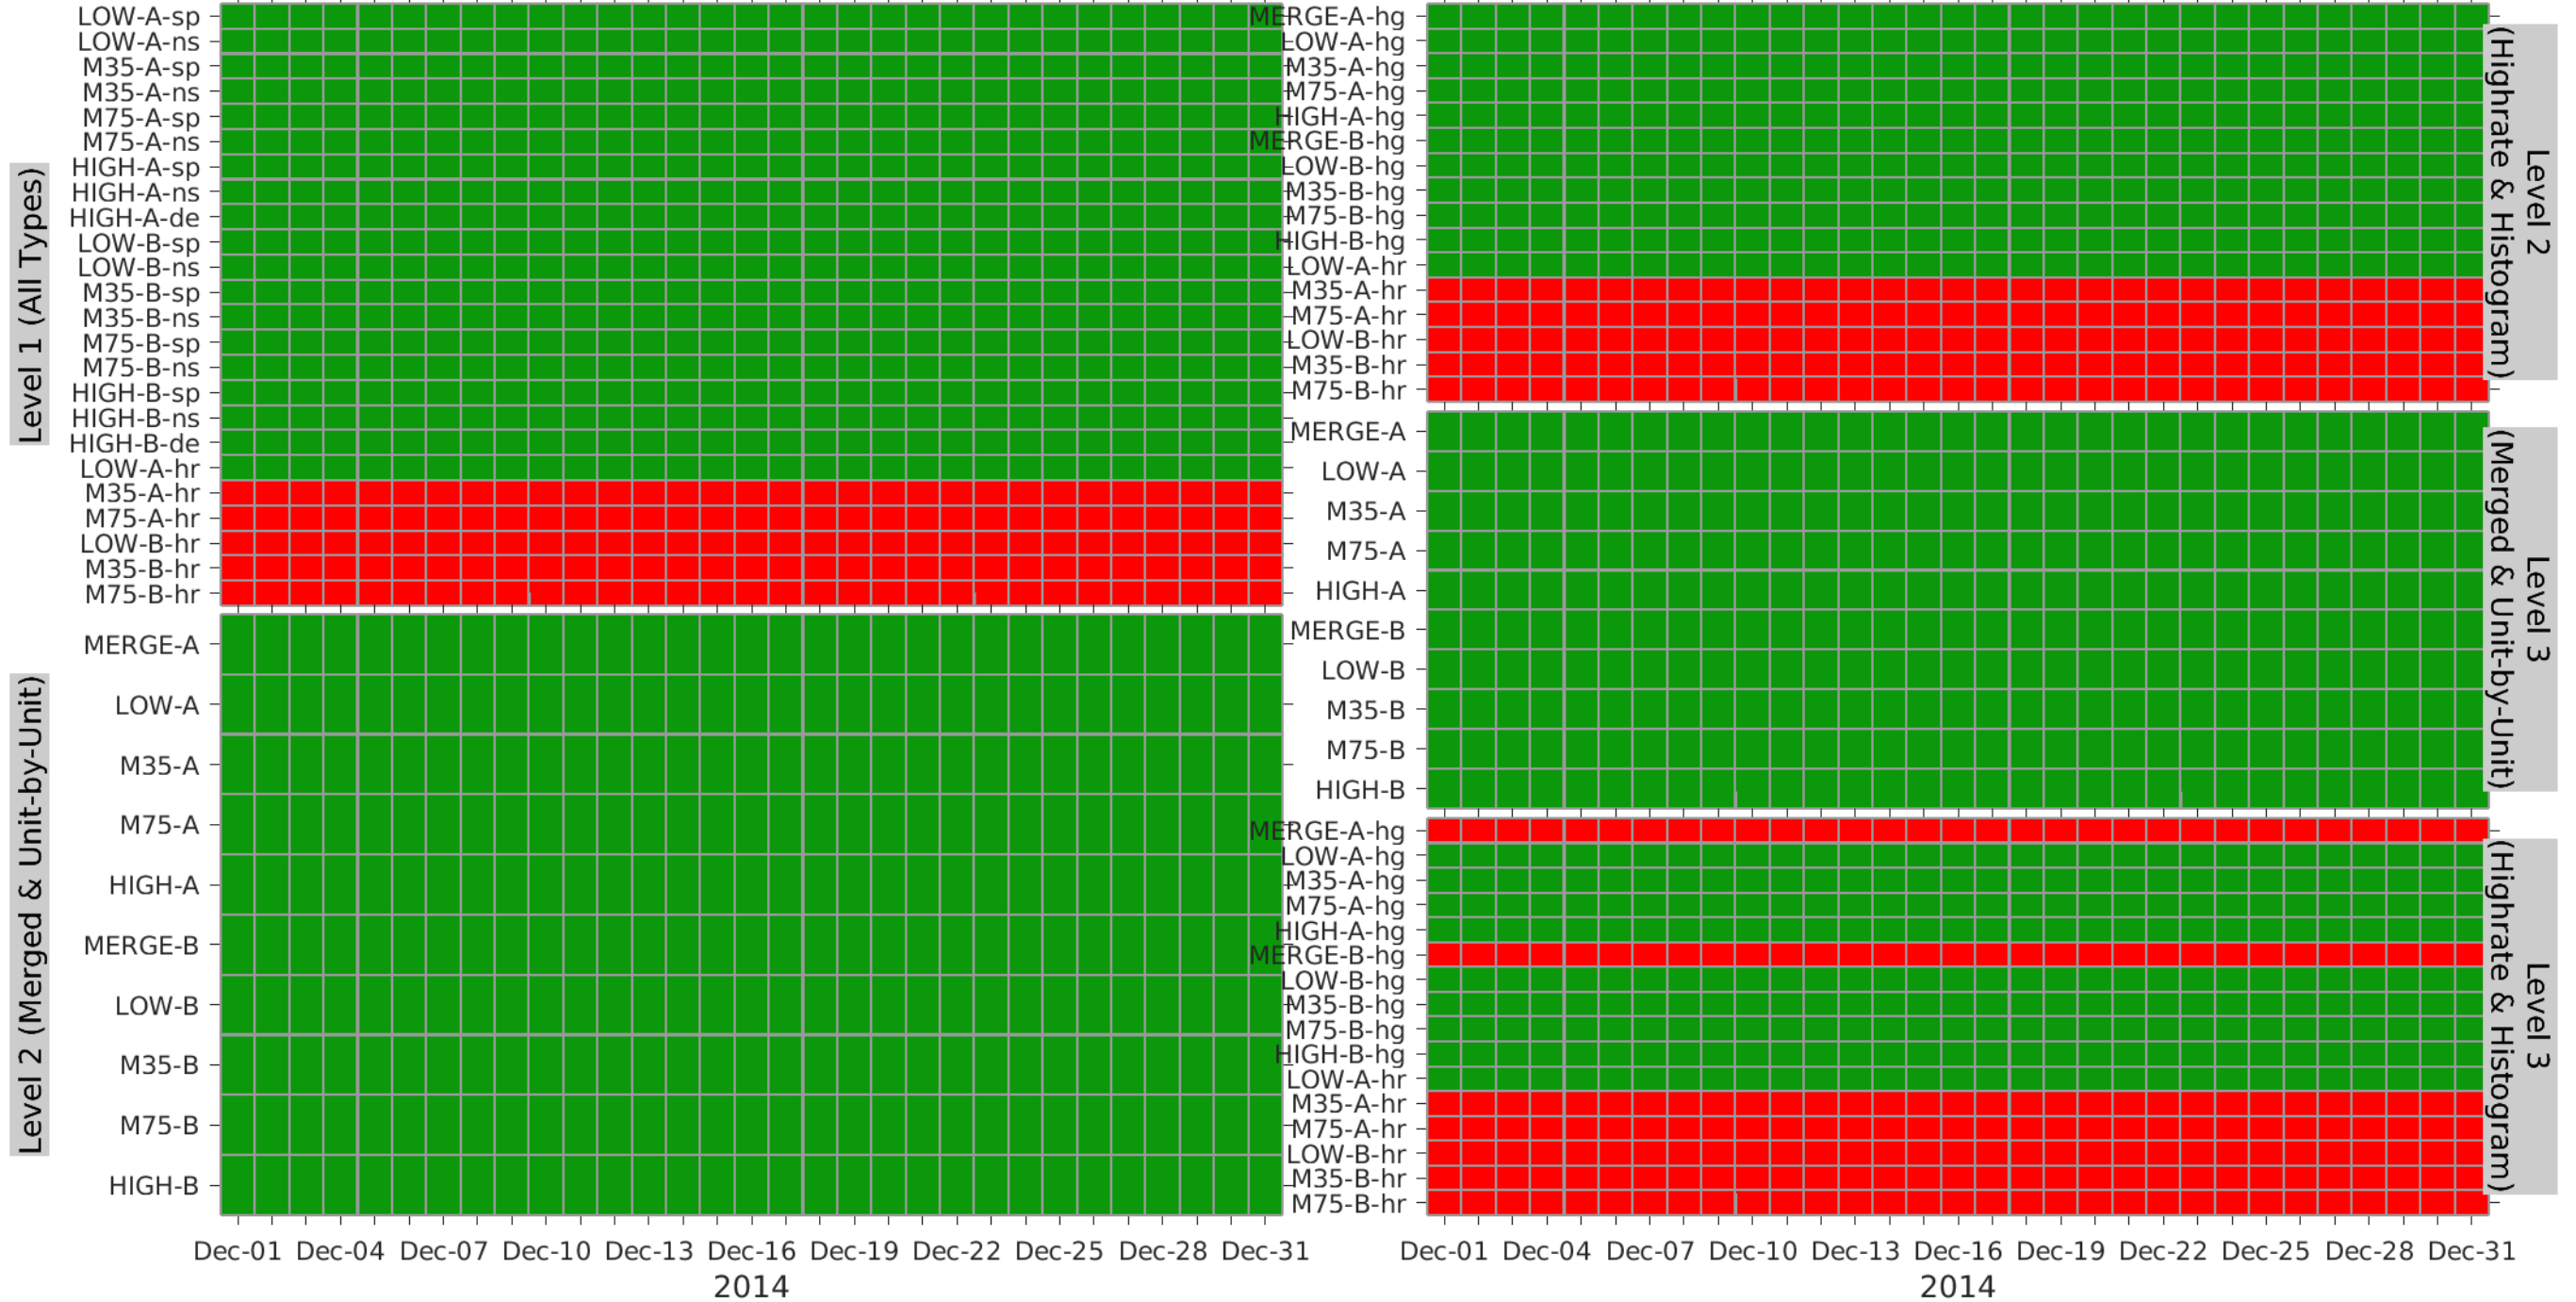

MagEIS Data Files | Created on: 2021/10/21 | Green = File Exists | Red = File Does Not Exist

sp=spin-based (science) | ns=non-science (housekeeping & status) | hr=highrate (LOW/MED only) | hg=histogram | de=direct event (HIGH only)

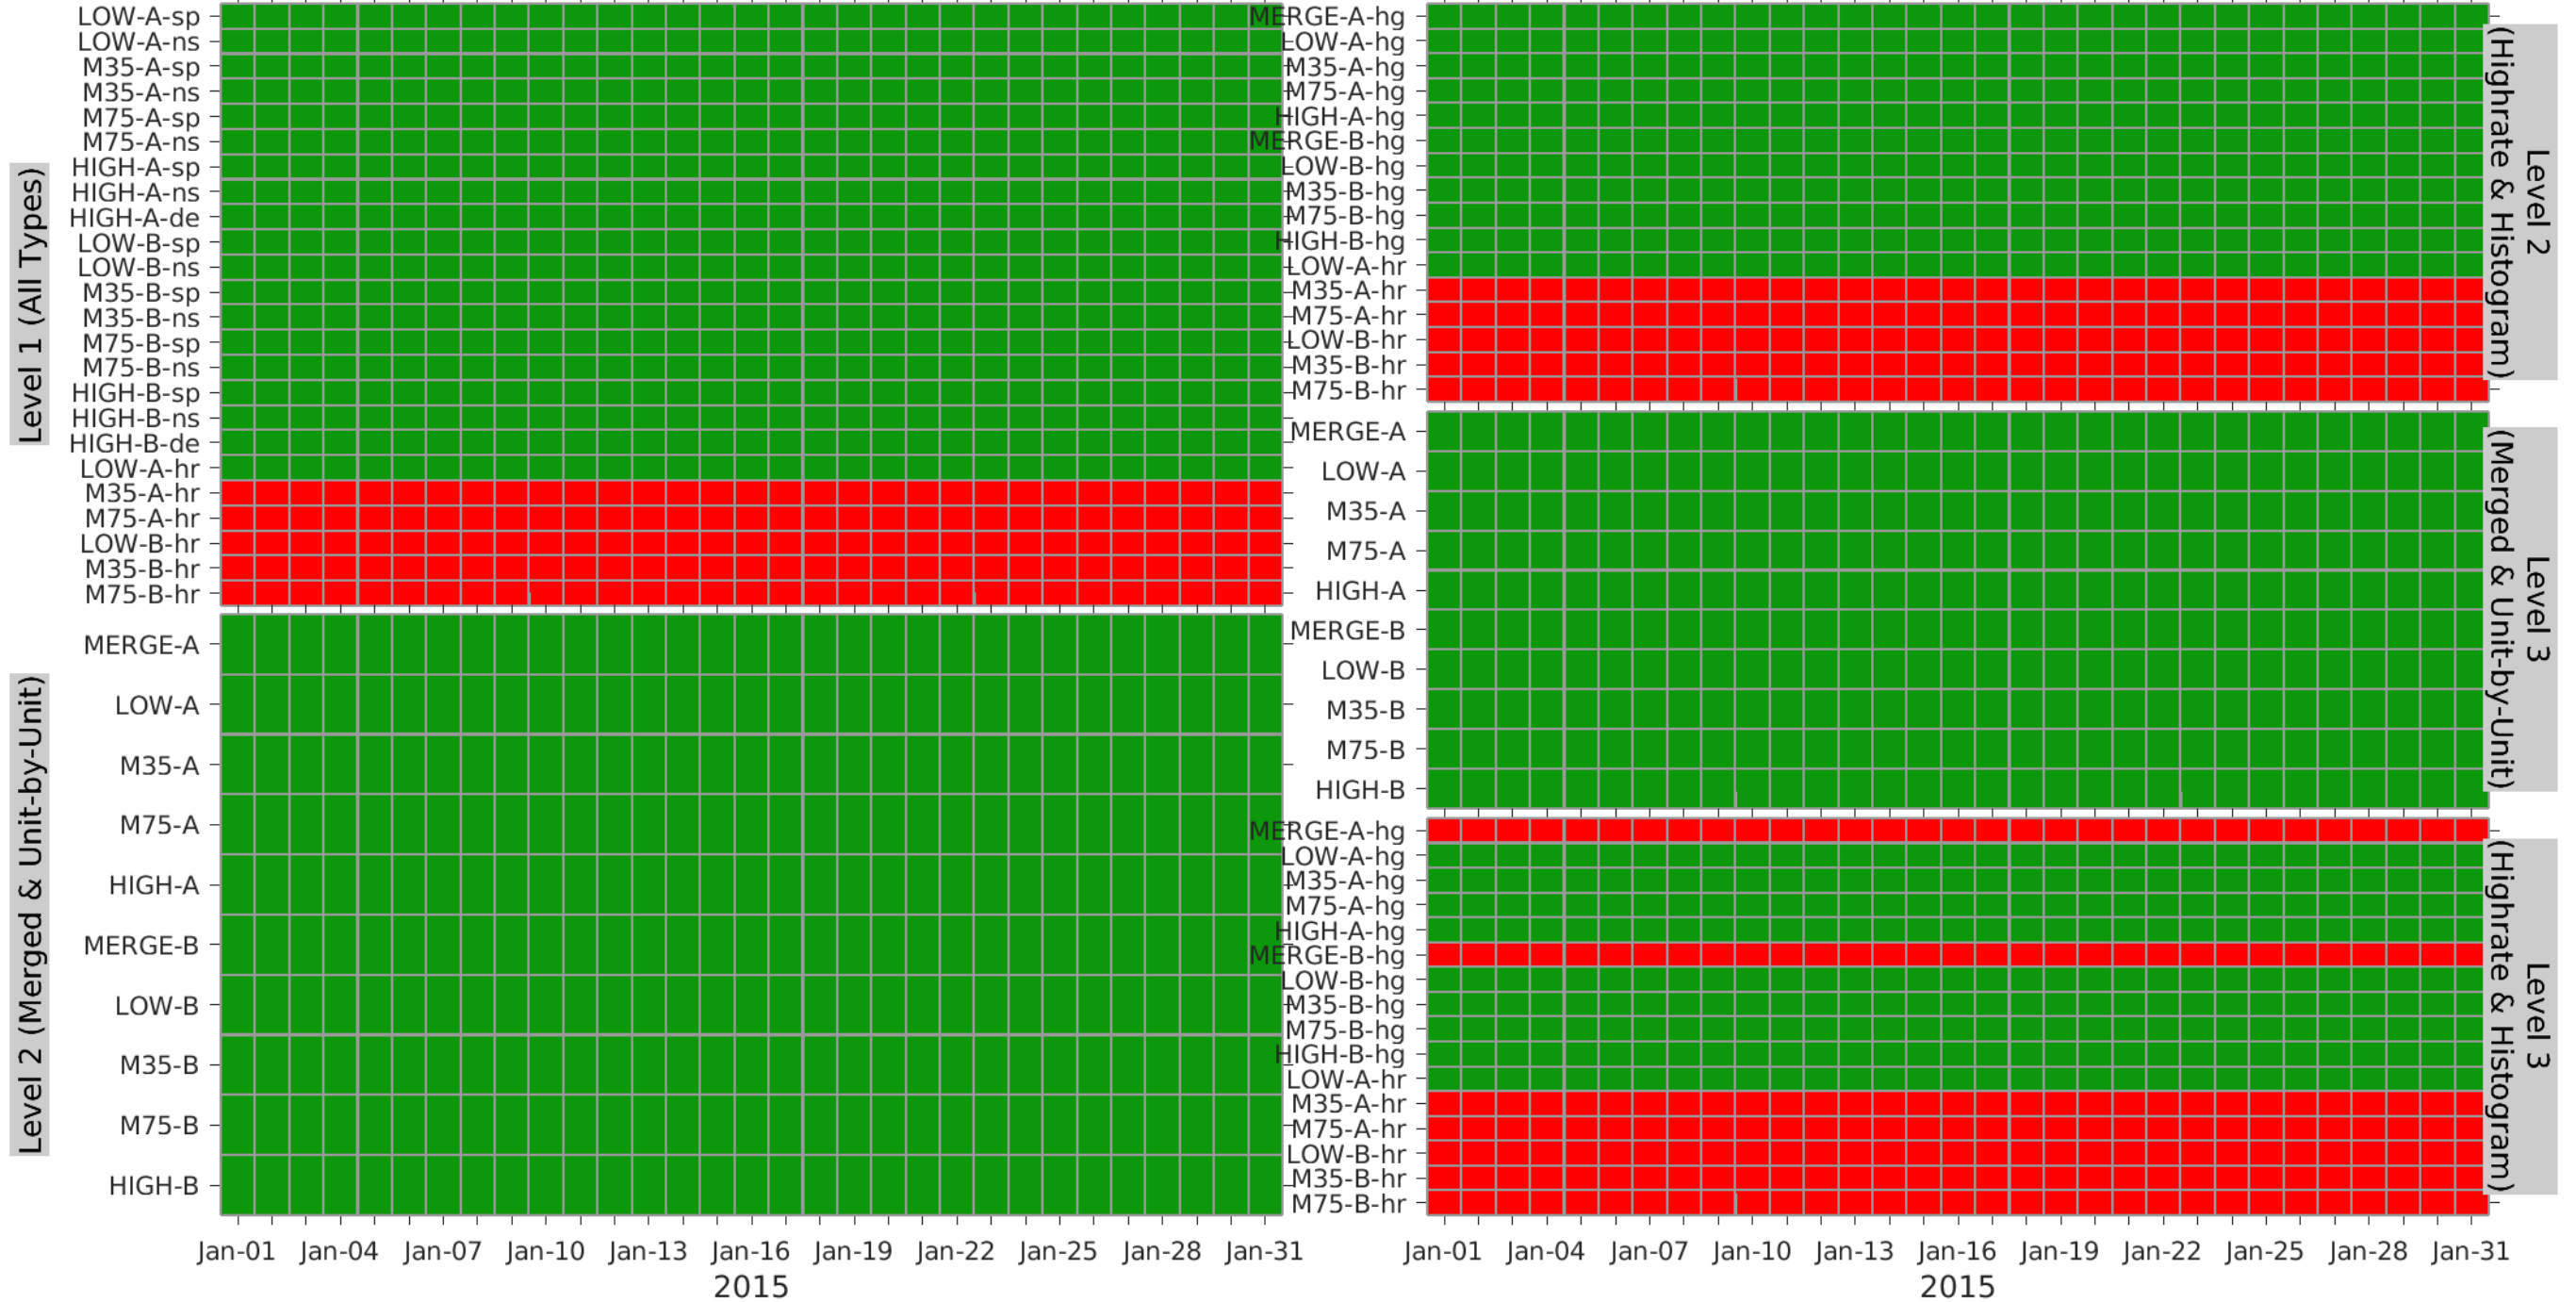

sp=spin-based (science) | ns=non-science (housekeeping & status) | hr=highrate (LOW/MED only) | hg=histogram | de=direct event (HIGH only)

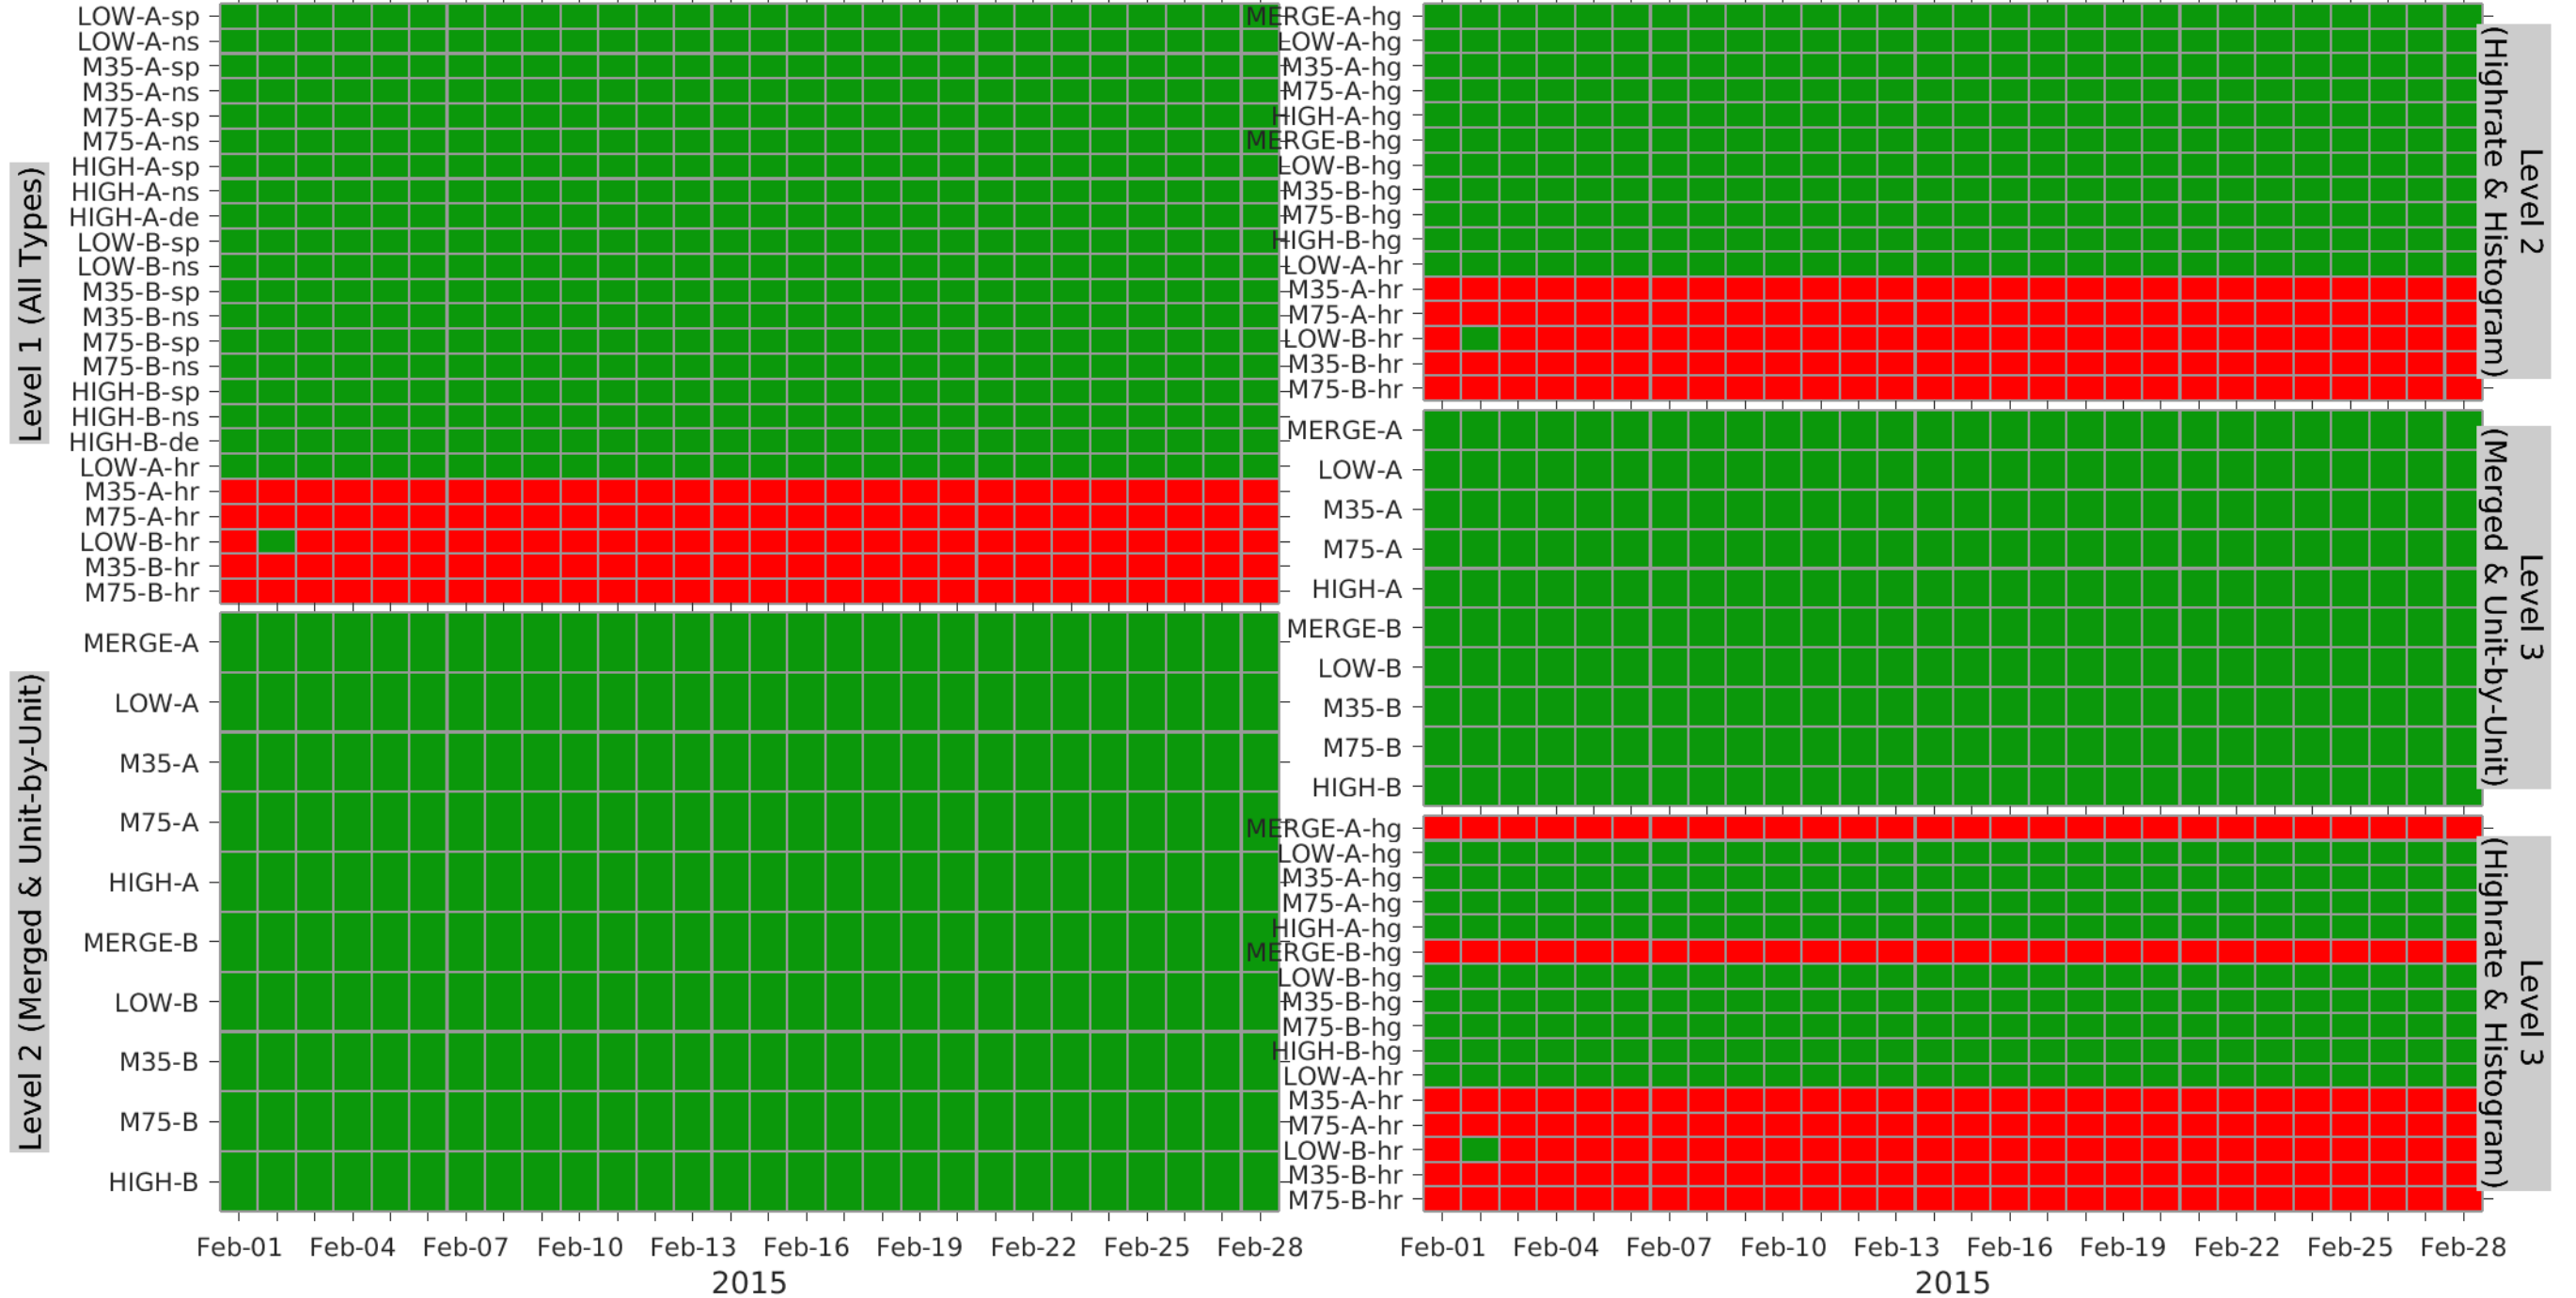

MagEIS Data Files | Created on: 2021/10/21 | Green = File Exists | Red = File Does Not Exist

sp=spin-based (science) | ns=non-science (housekeeping & status) | hr=highrate (LOW/MED only) | hg=histogram | de=direct event (HIGH only)

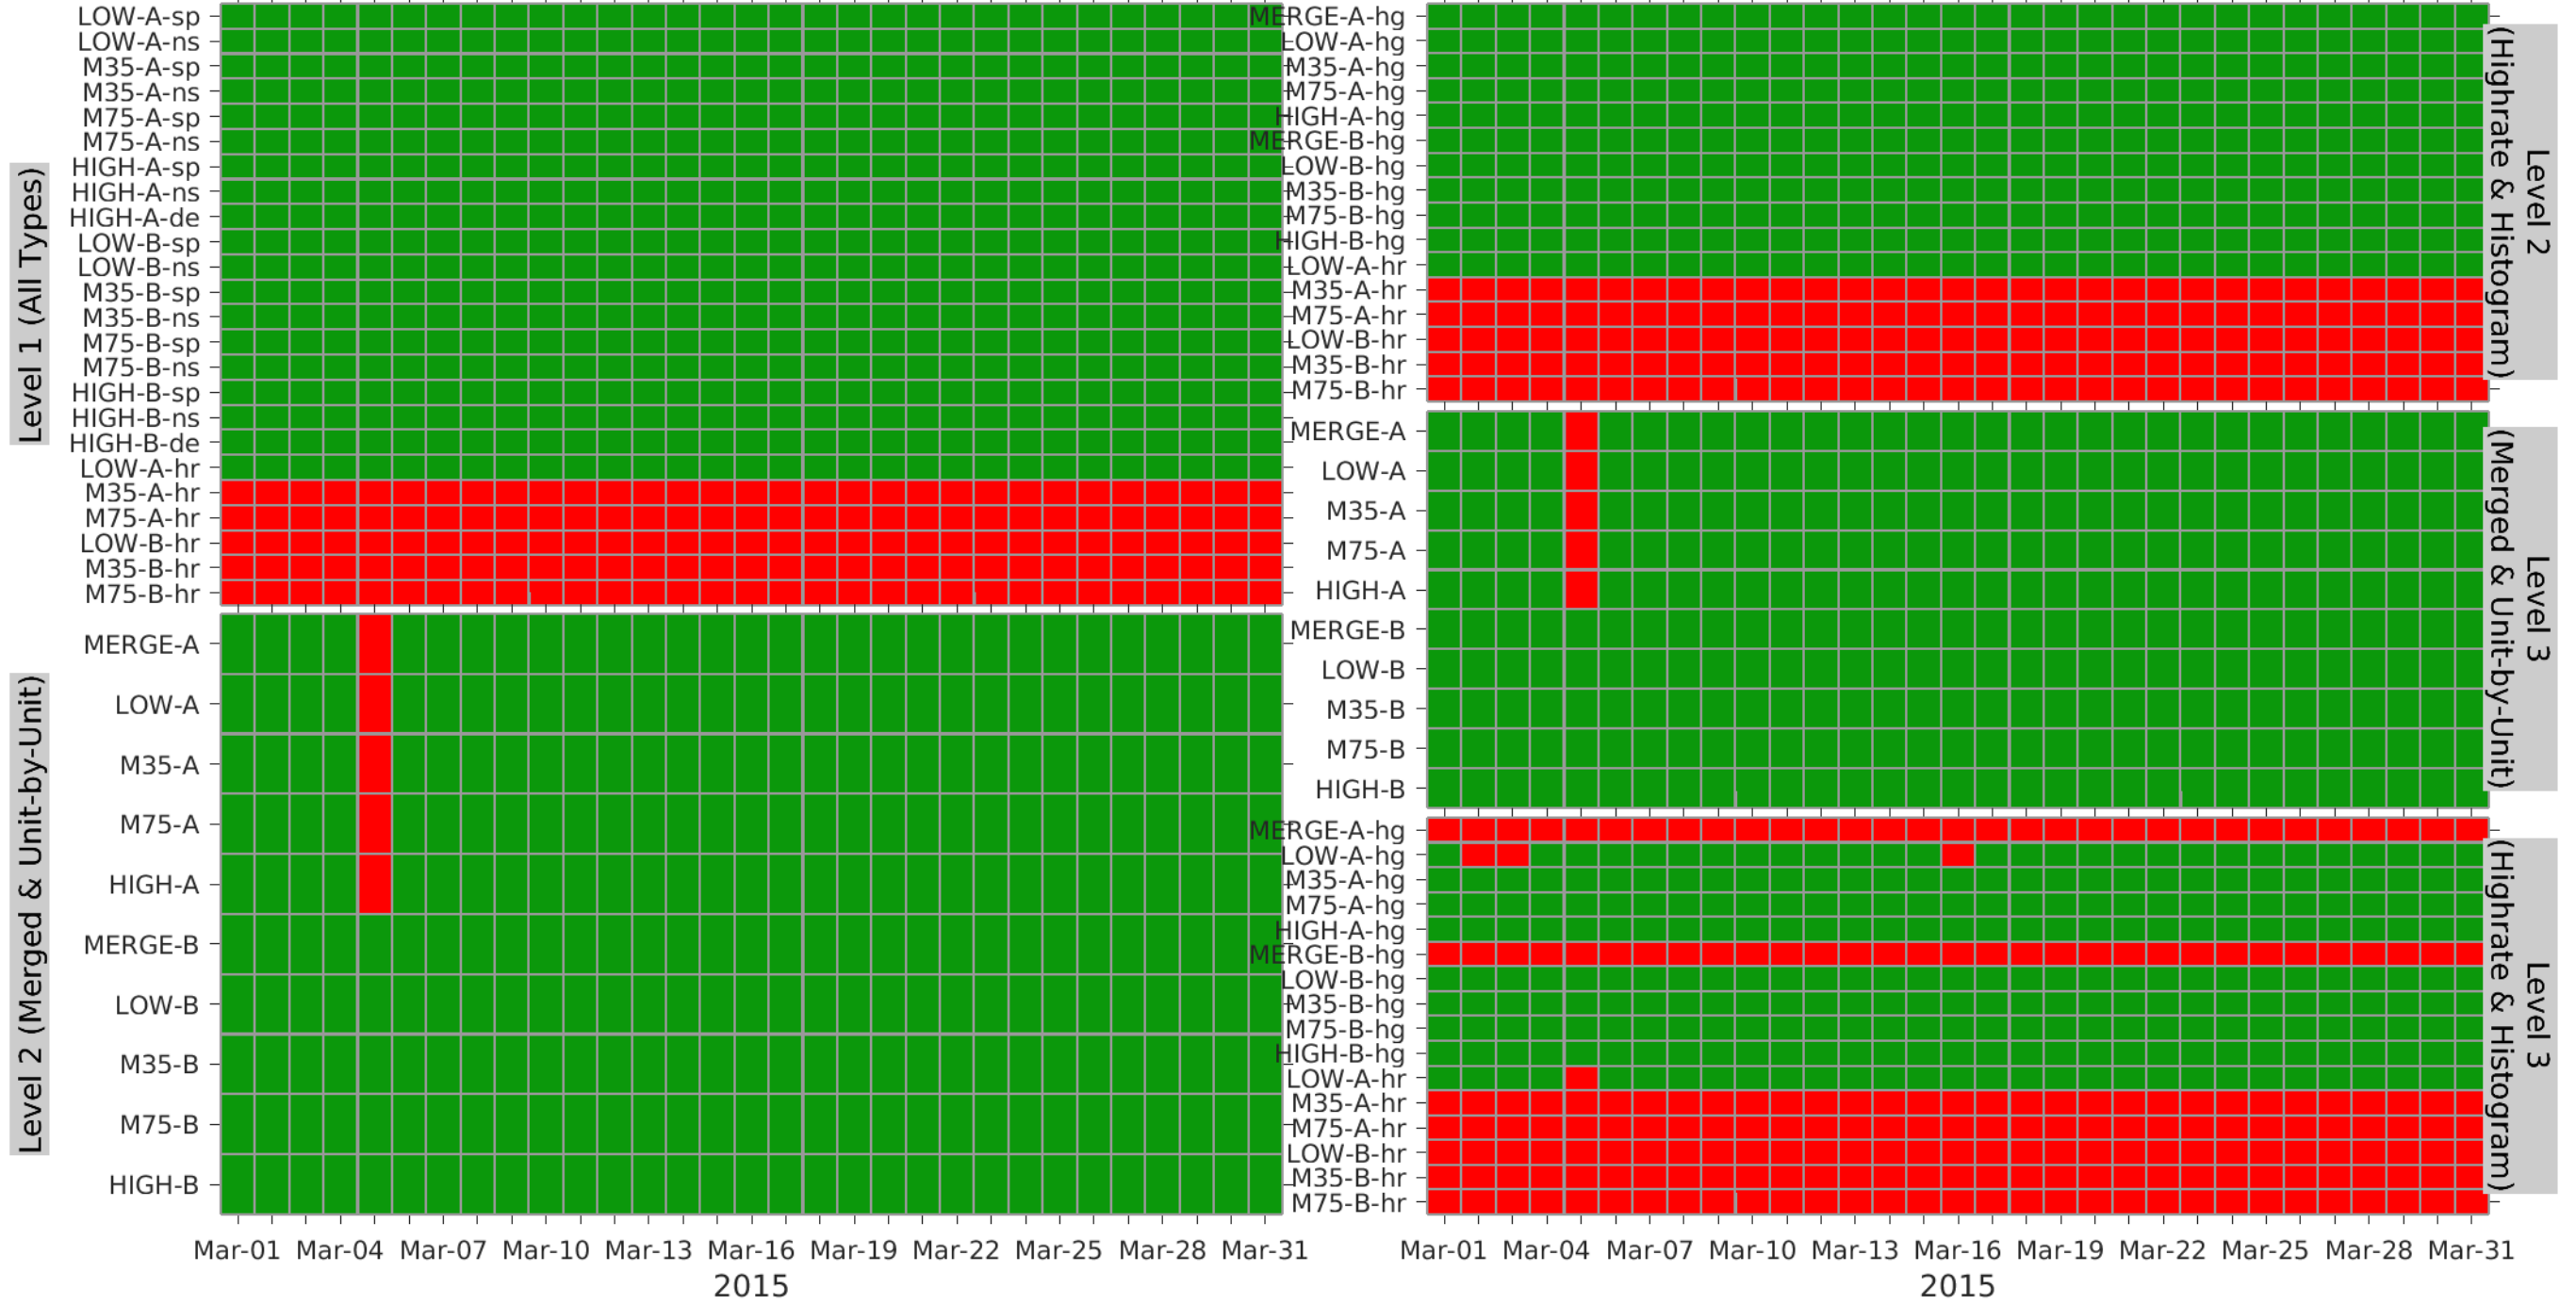



MagEIS Data Files | Created on: 2021/10/21 | Green = File Exists | Red = File Does Not Exist

sp=spin-based (science) | ns=non-science (housekeeping & status) | hr=highrate (LOW/MED only) | hg=histogram | de=direct event (HIGH only)

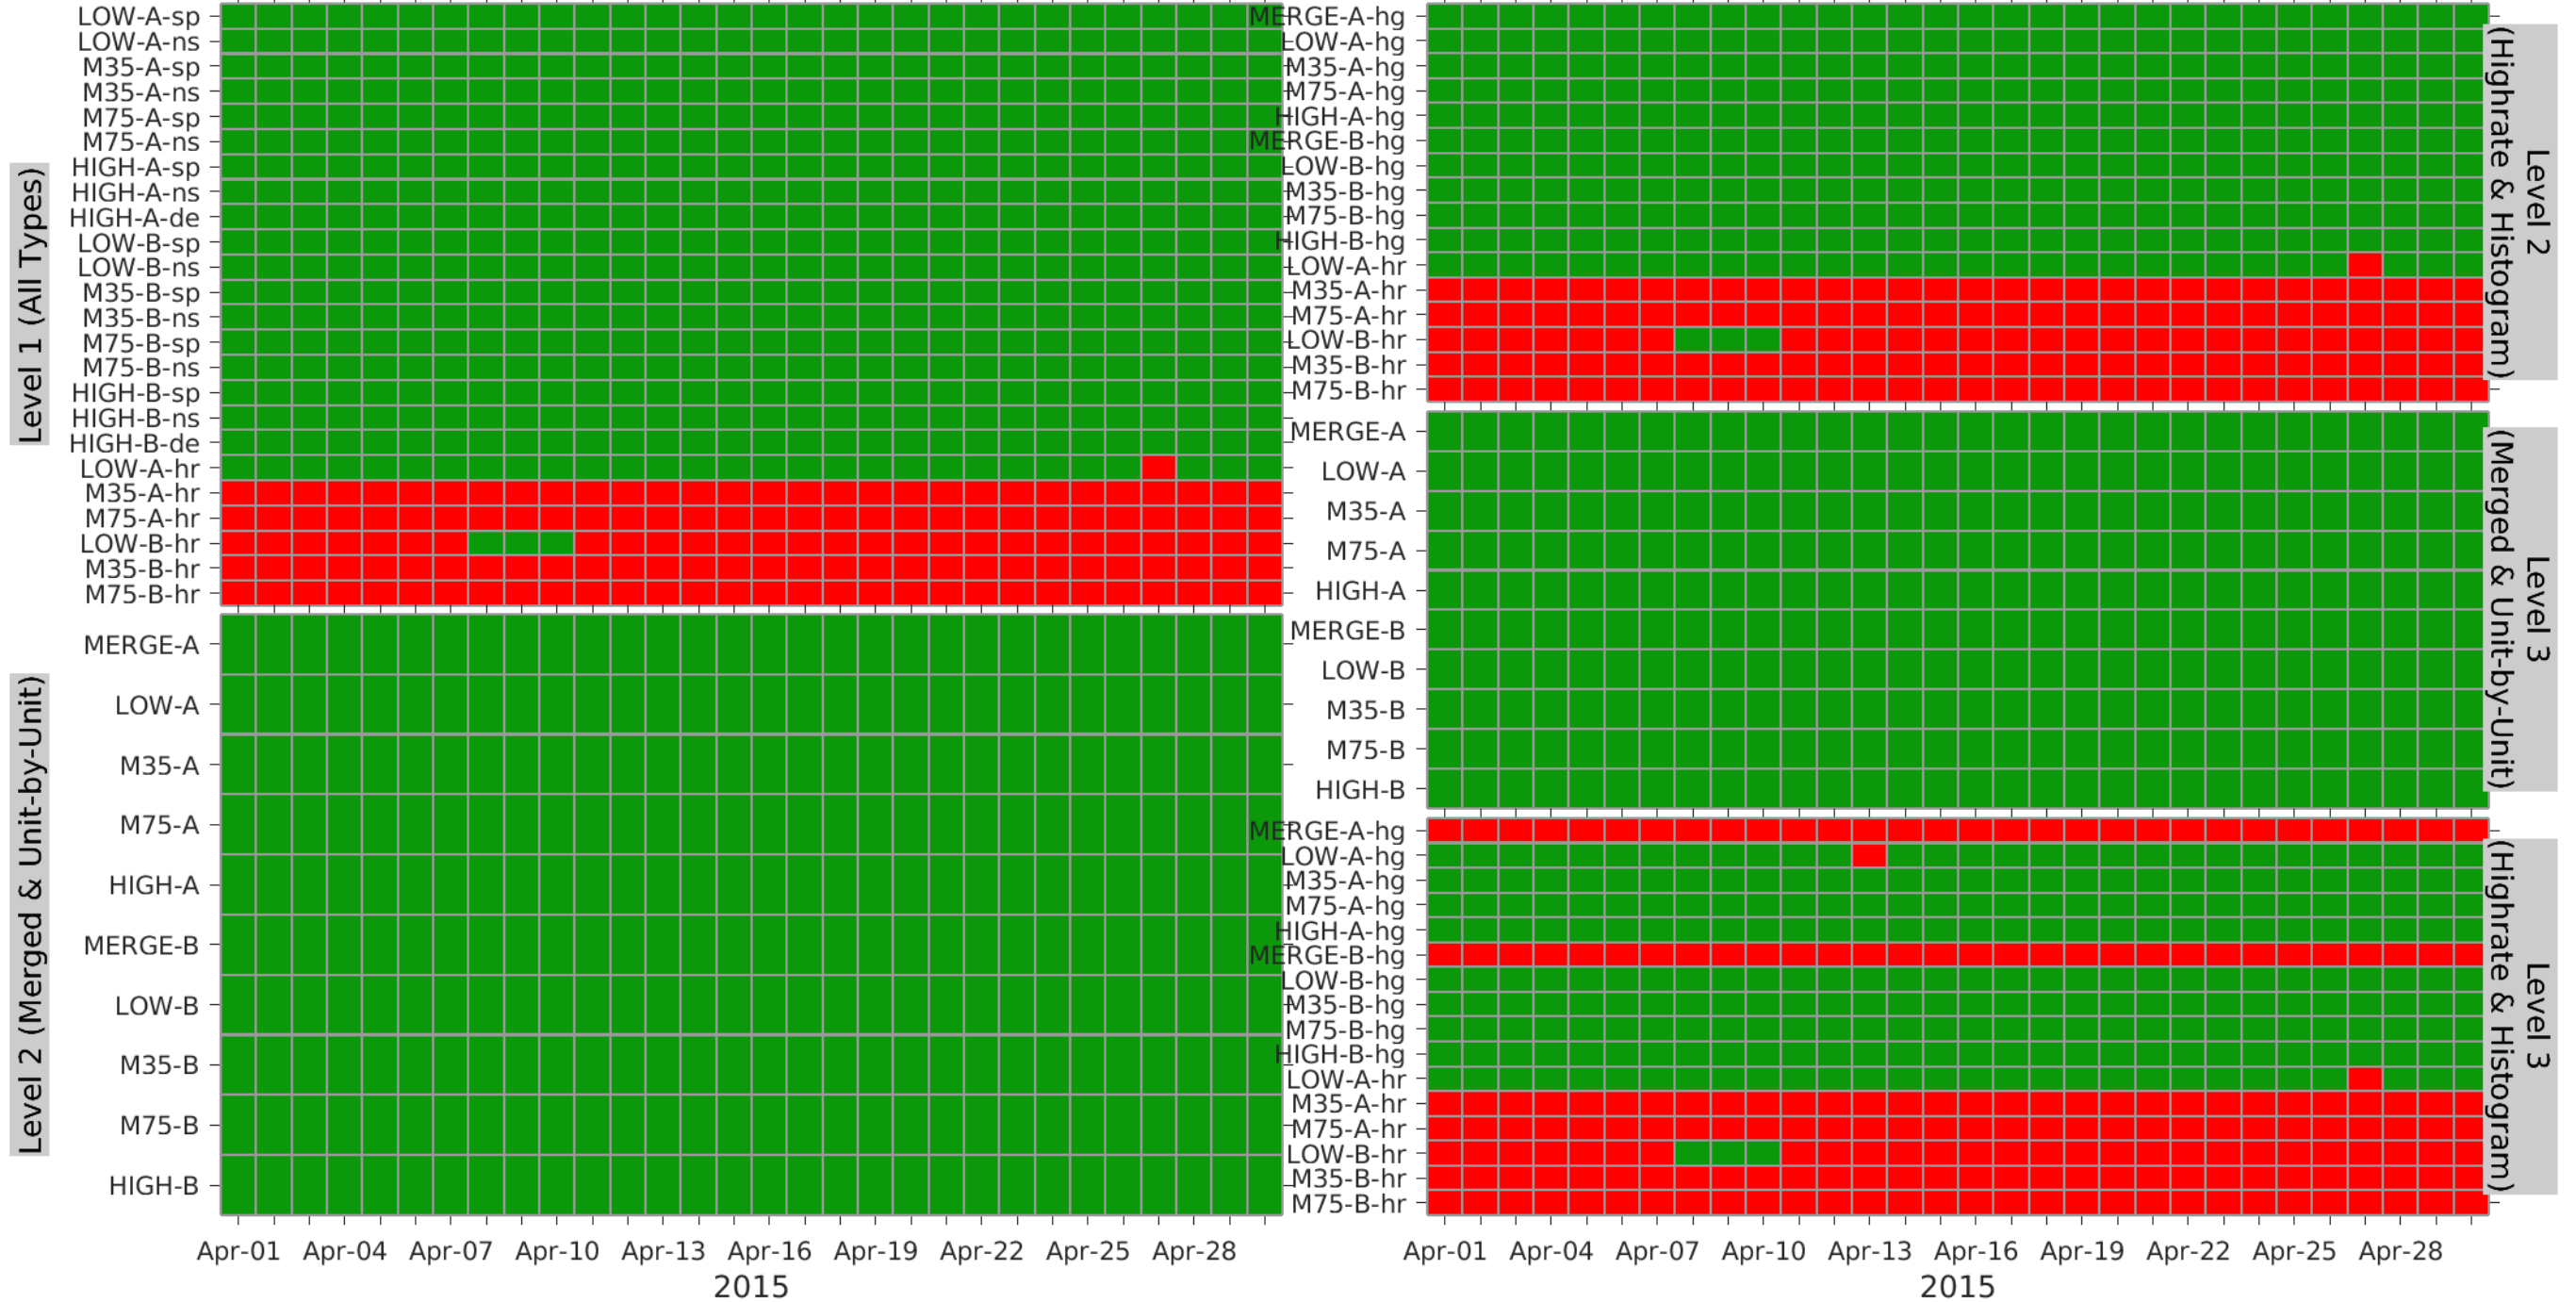

MagEIS Data Files | Created on: 2021/10/21 | Green = File Exists | Red = File Does Not Exist

sp=spin-based (science) | ns=non-science (housekeeping & status) | hr=highrate (LOW/MED only) | hg=histogram | de=direct event (HIGH only)

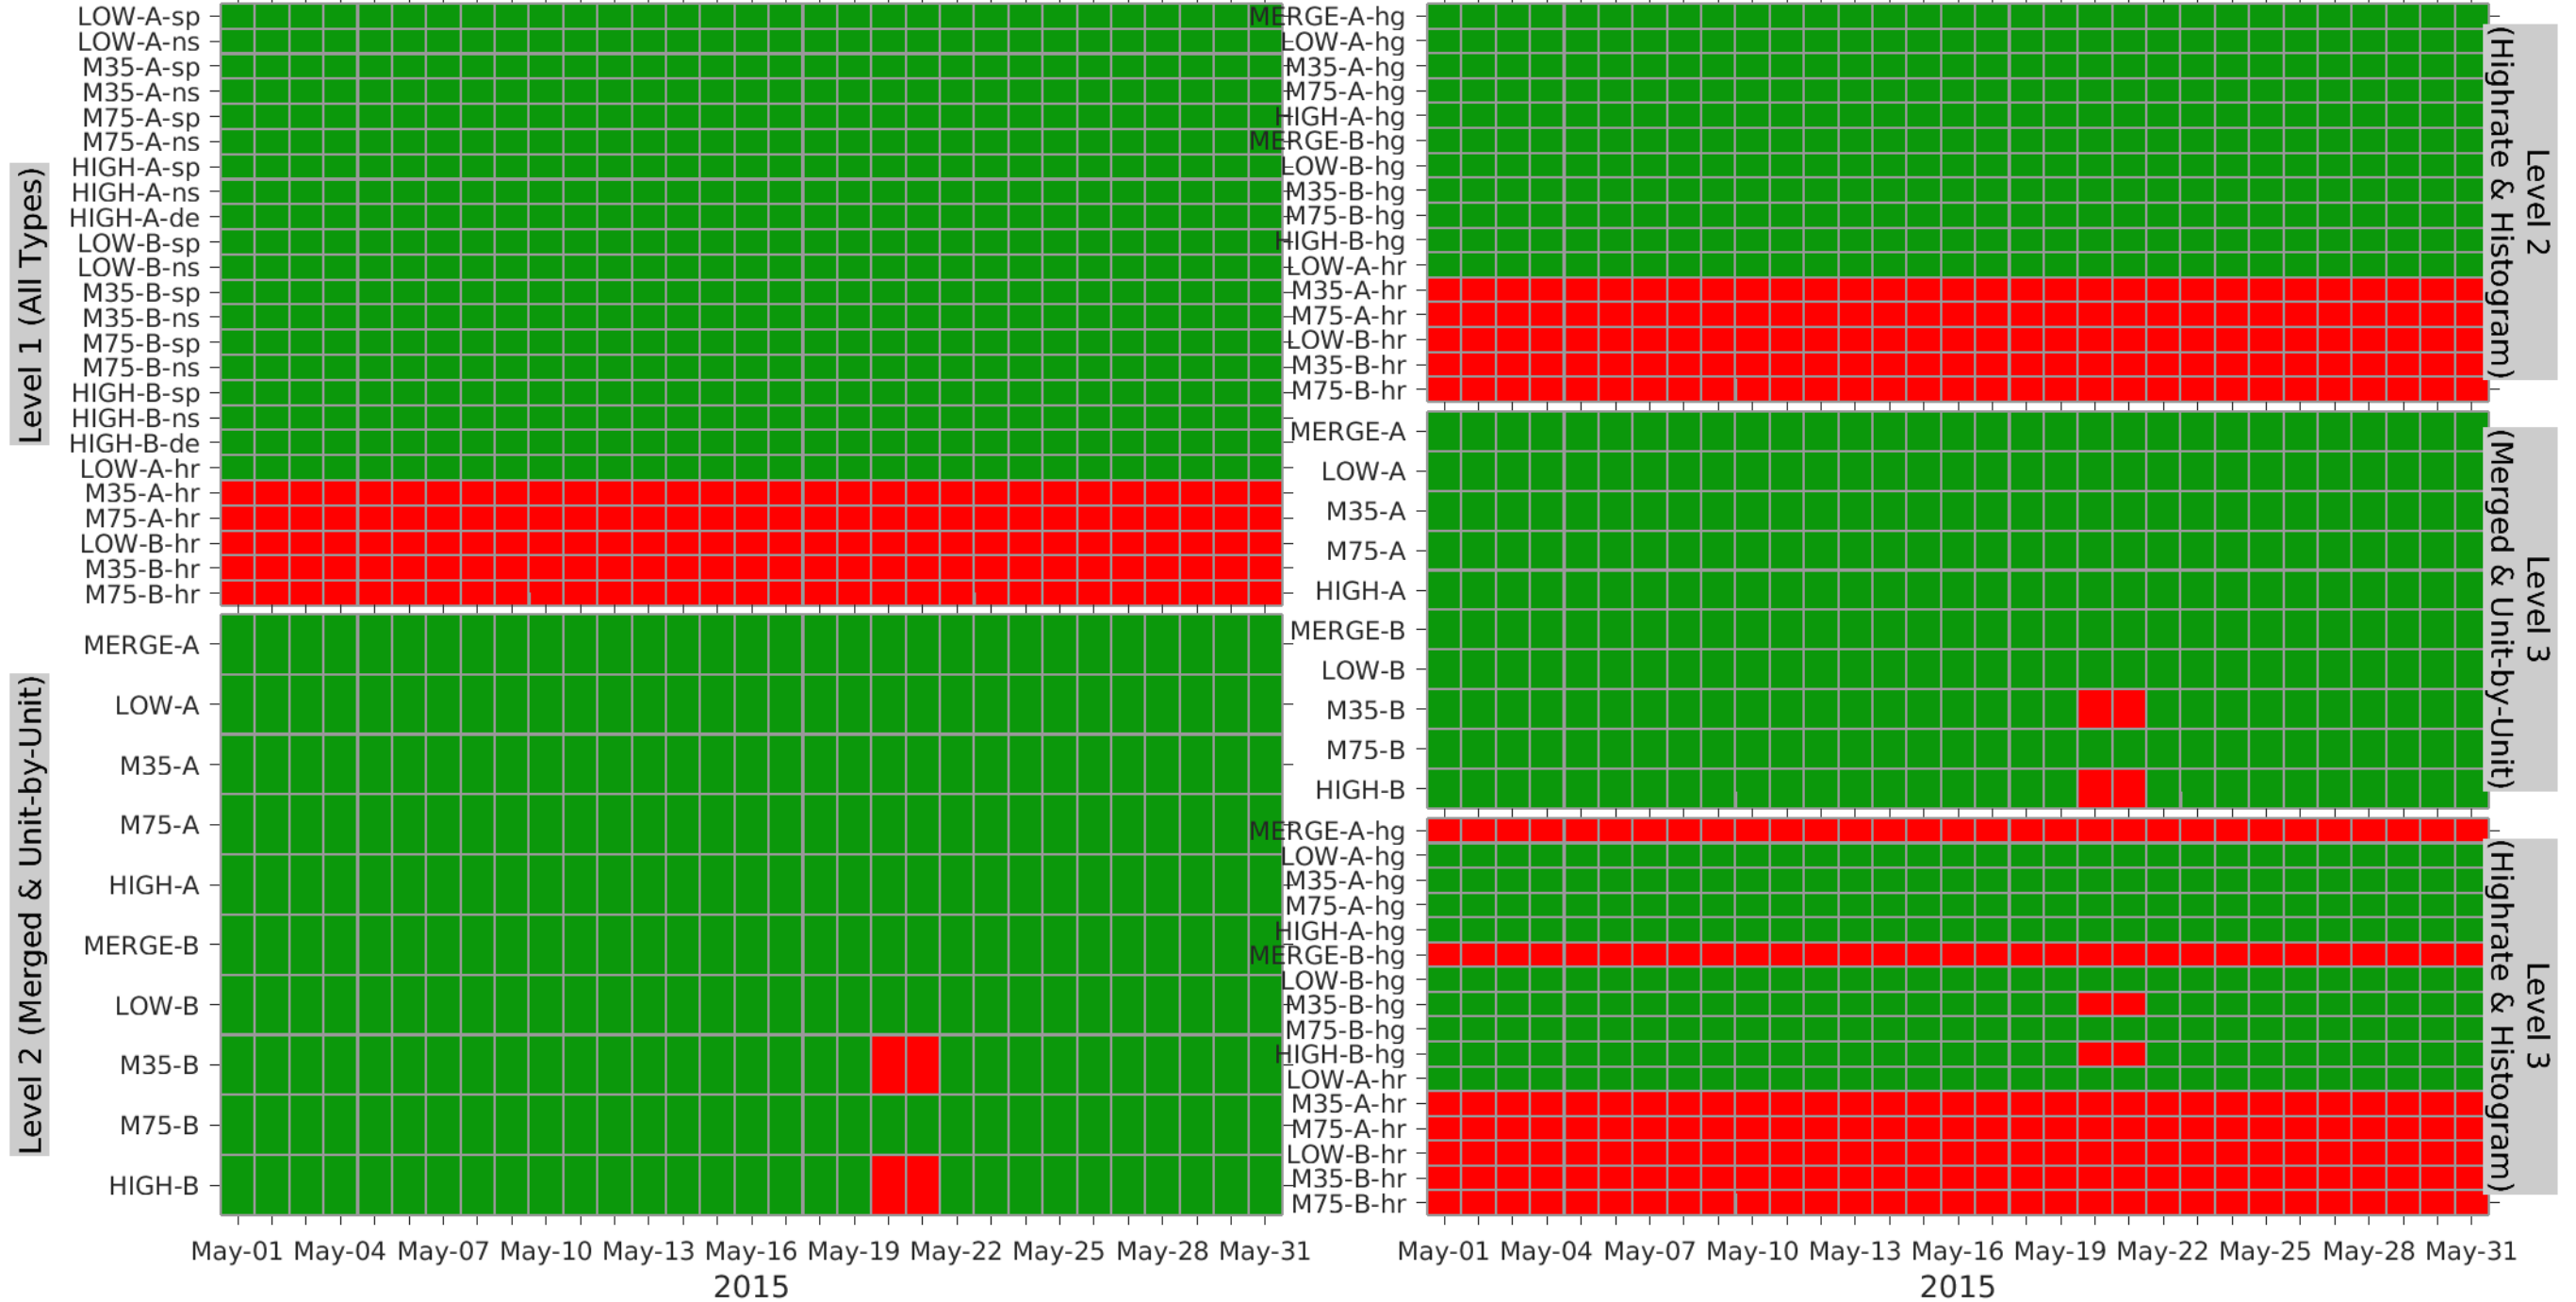

MagEIS Data Files | Created on: 2021/10/21 | Green = File Exists | Red = File Does Not Exist

sp=spin-based (science) | ns=non-science (housekeeping & status) | hr=highrate (LOW/MED only) | hg=histogram | de=direct event (HIGH only)

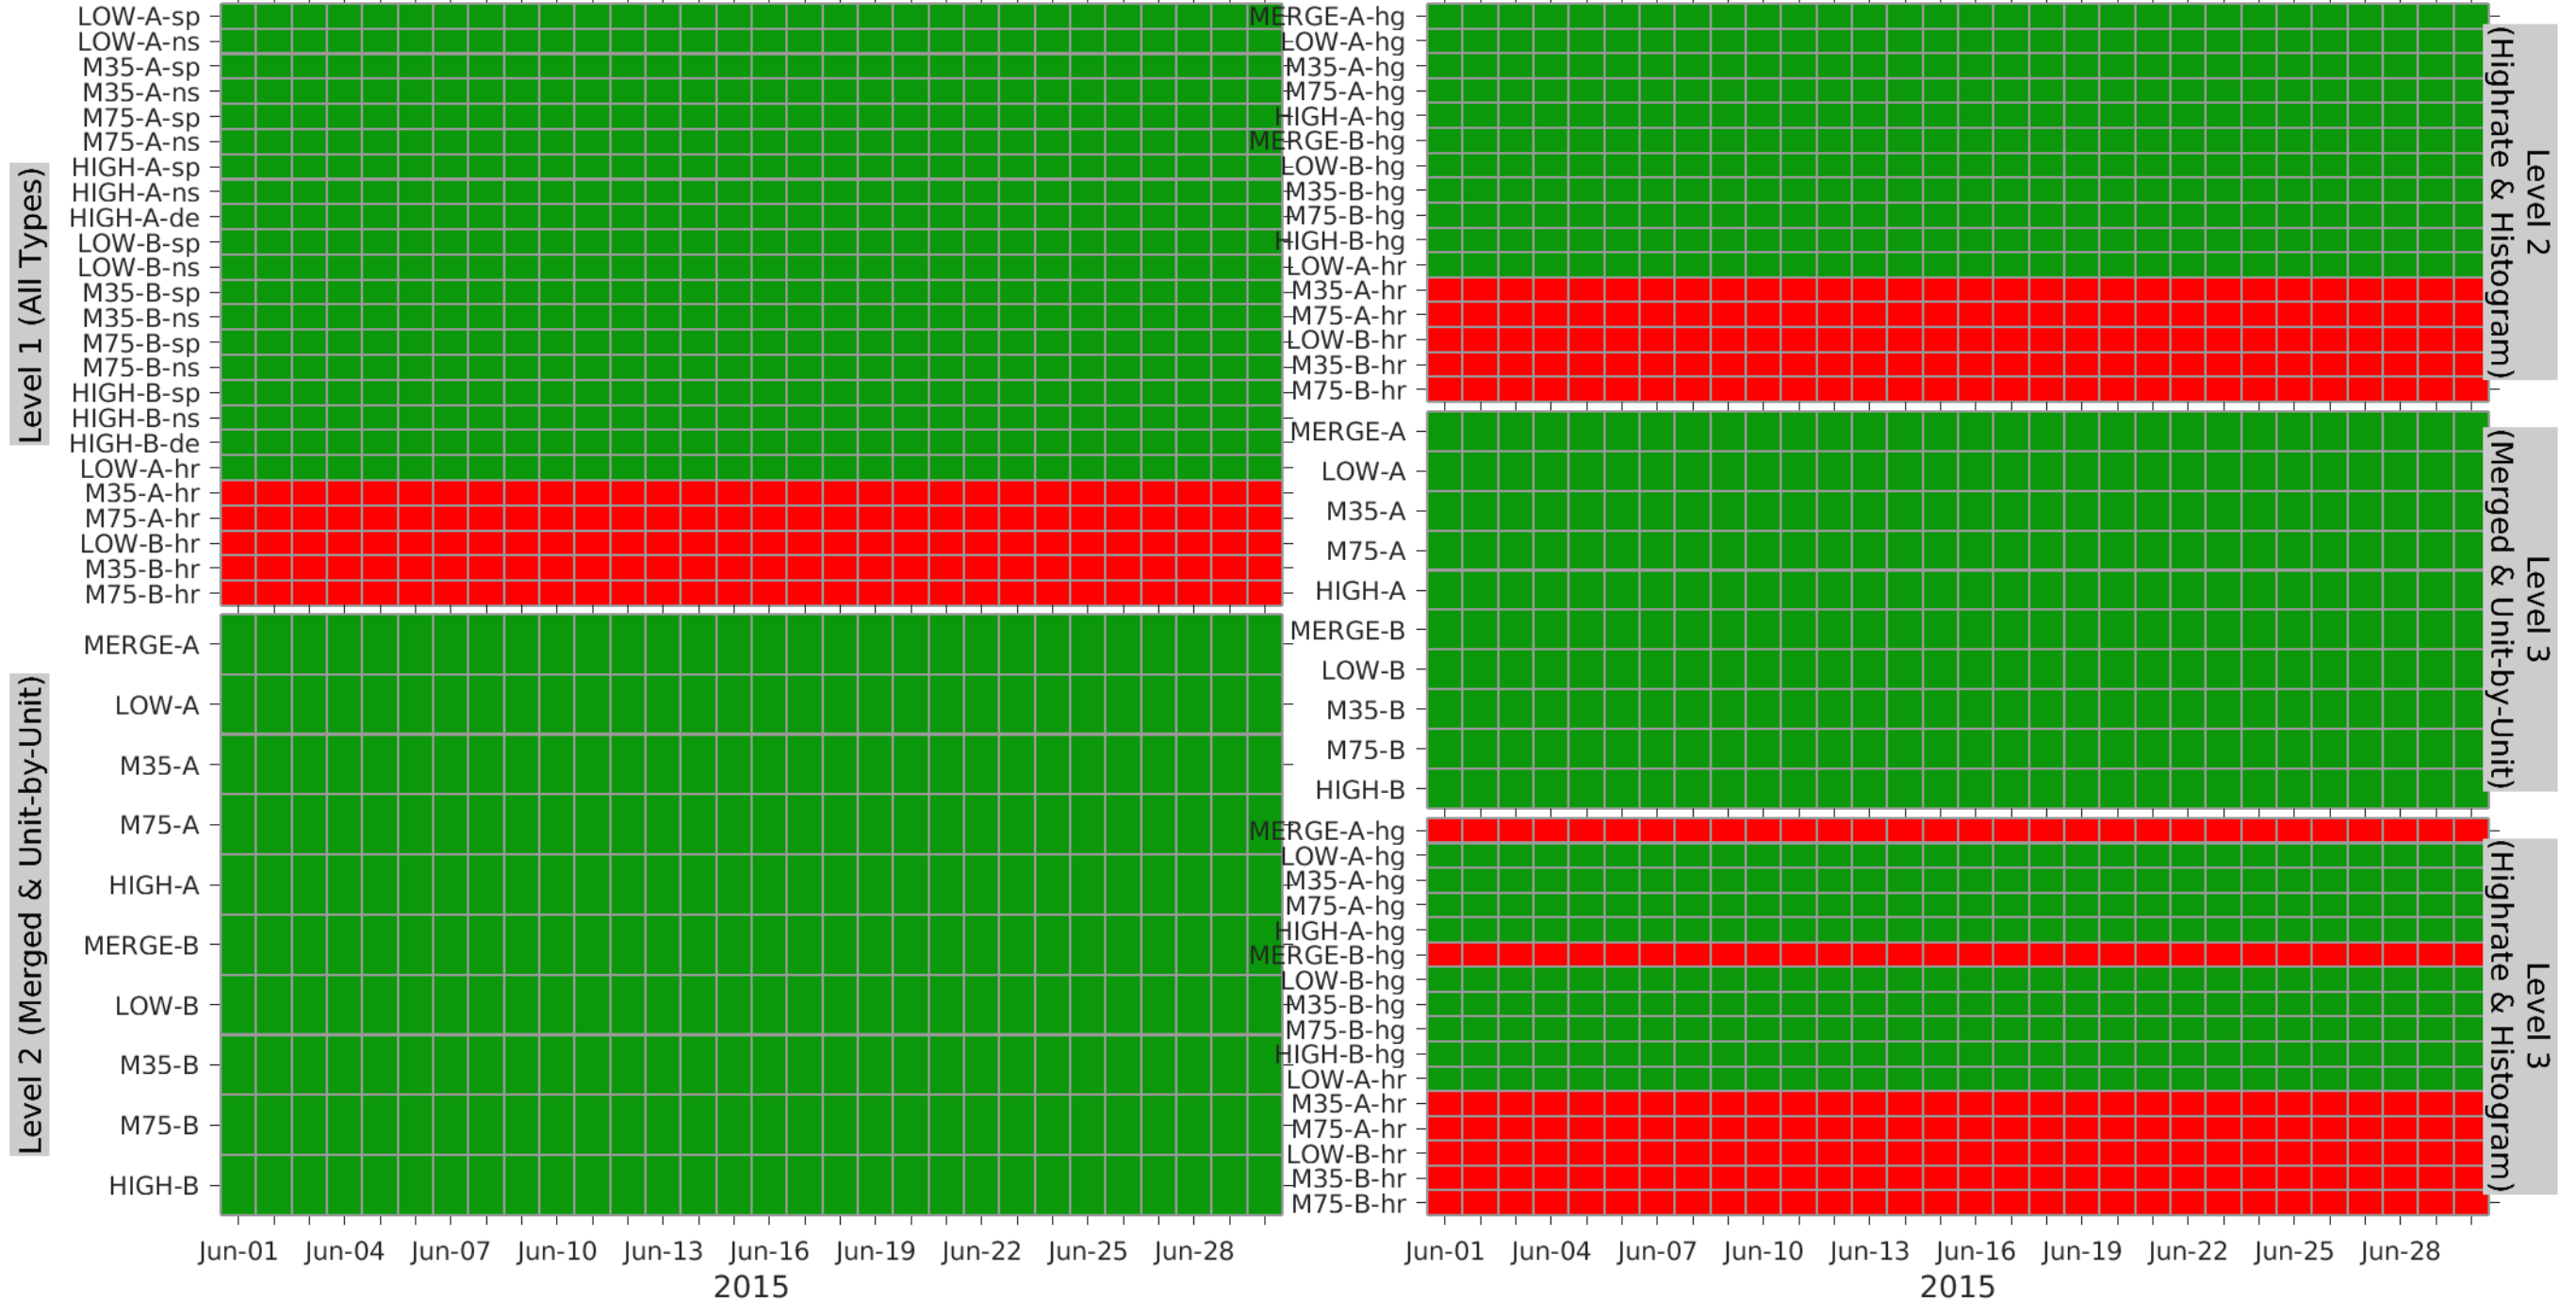

MagEIS Data Files | Created on: 2021/10/21 | Green = File Exists | Red = File Does Not Exist

sp=spin-based (science) | ns=non-science (housekeeping & status) | hr=highrate (LOW/MED only) | hg=histogram | de=direct event (HIGH only)

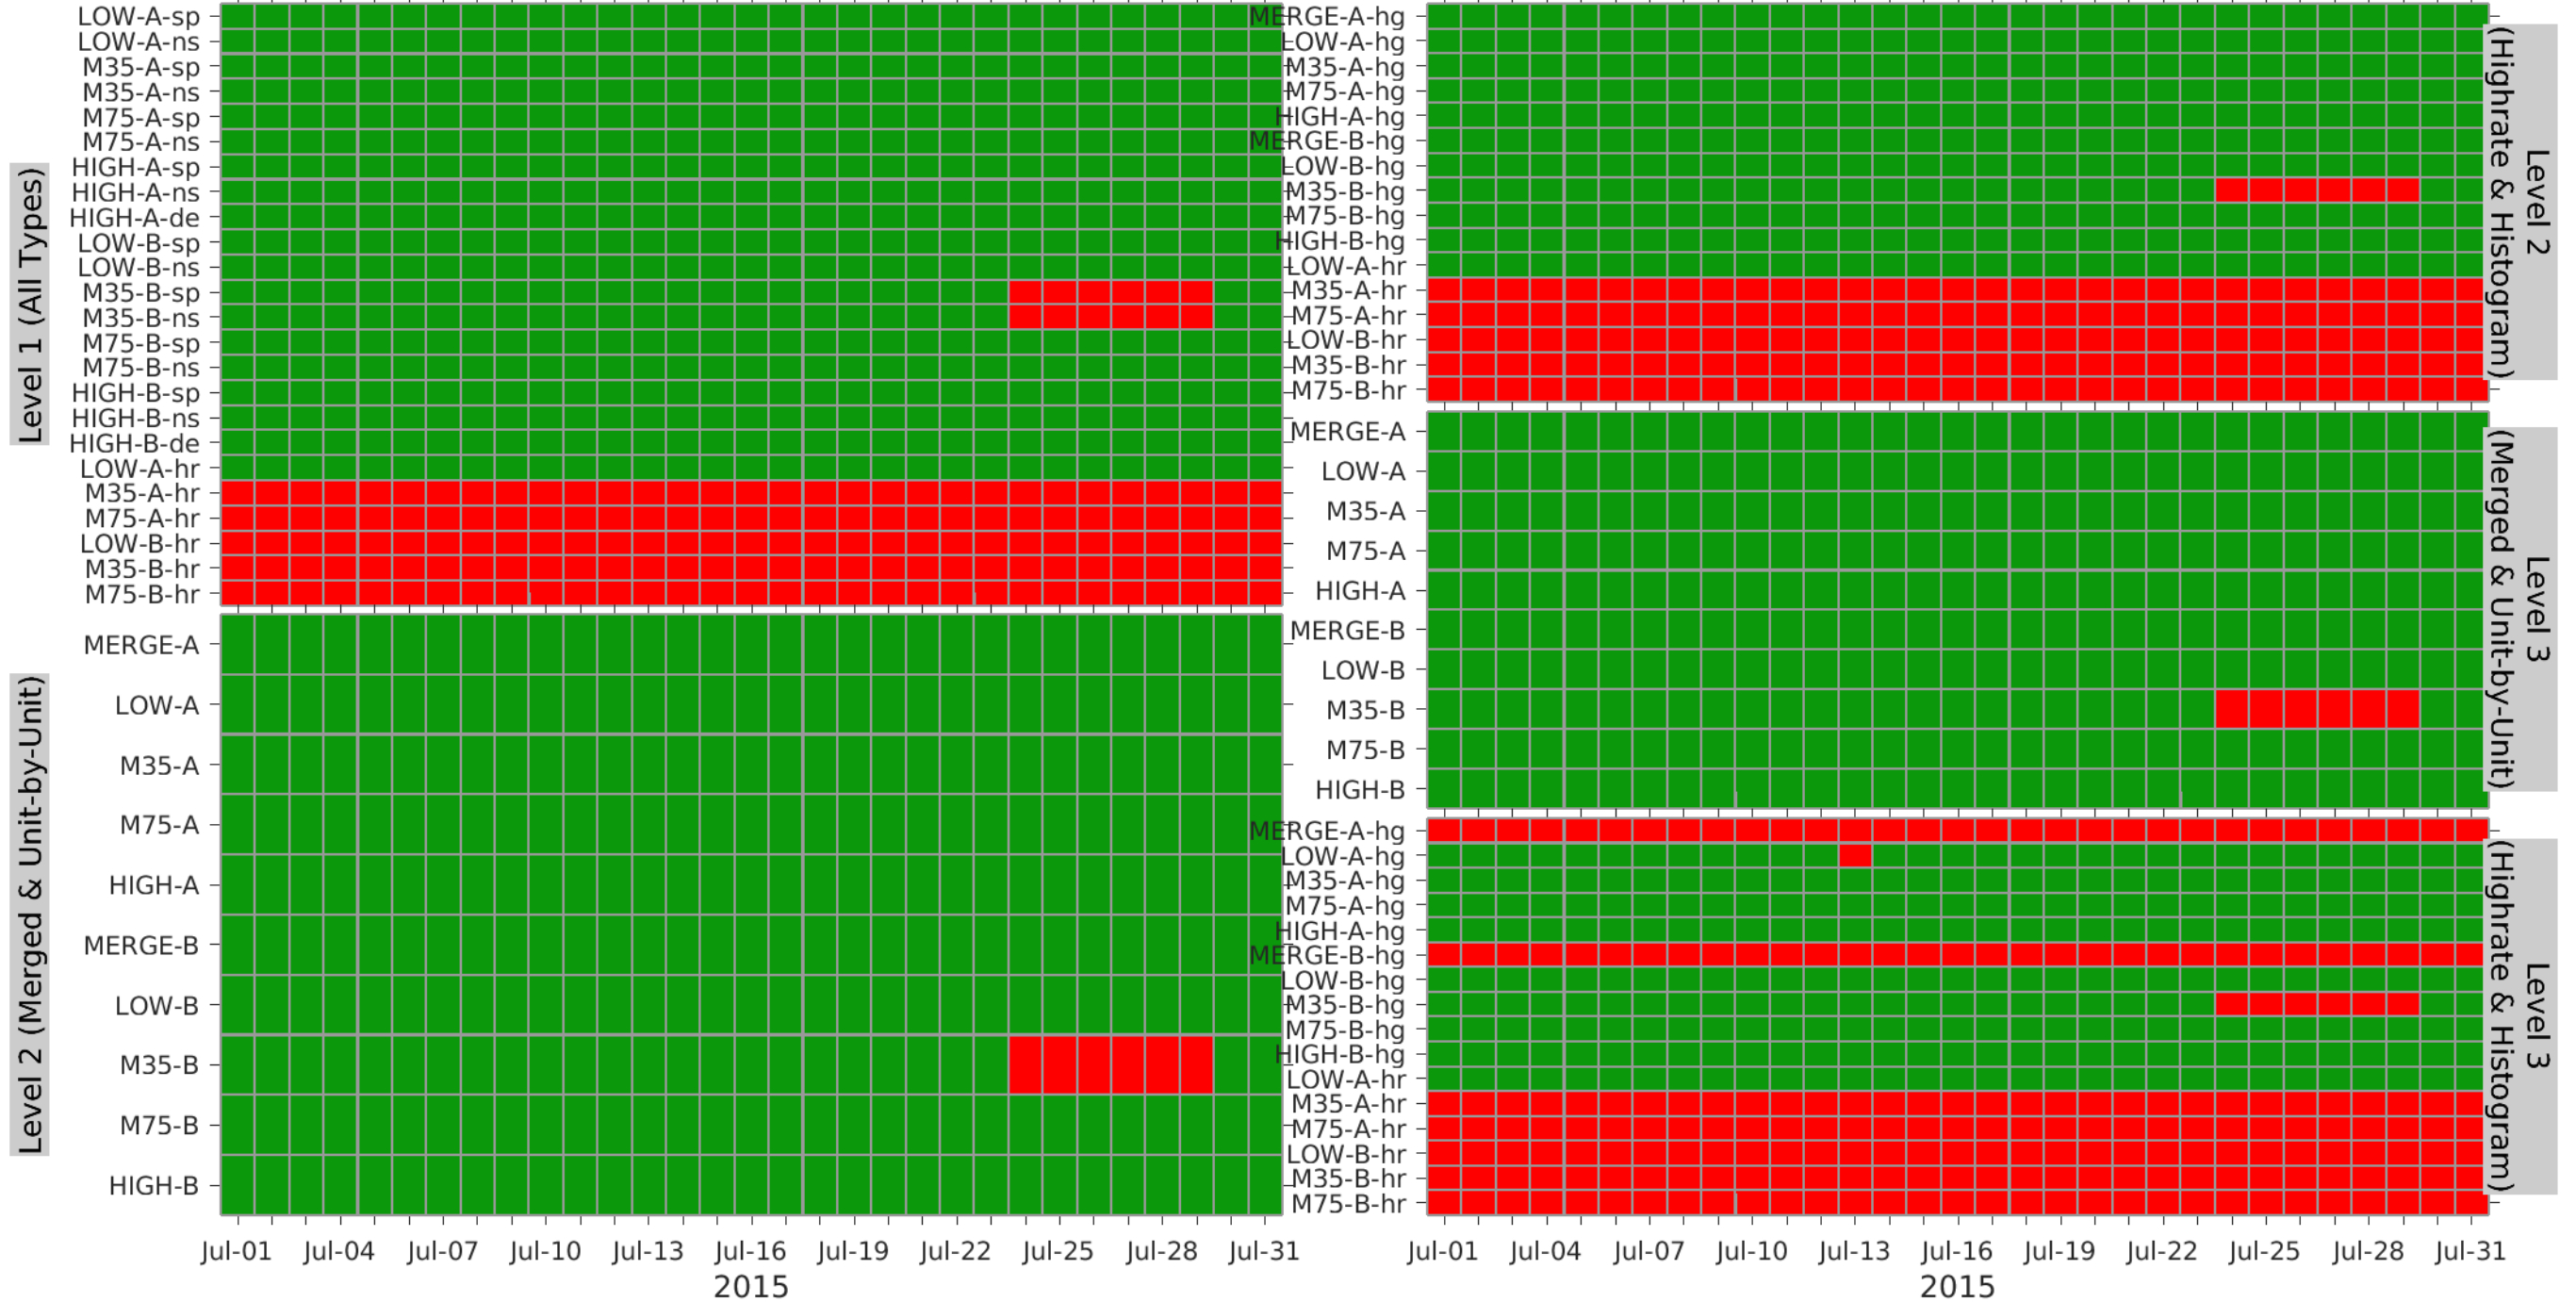

MagEIS Data Files | Created on: 2021/10/21 | Green = File Exists | Red = File Does Not Exist

sp=spin-based (science) | ns=non-science (housekeeping & status) | hr=highrate (LOW/MED only) | hg=histogram | de=direct event (HIGH only)

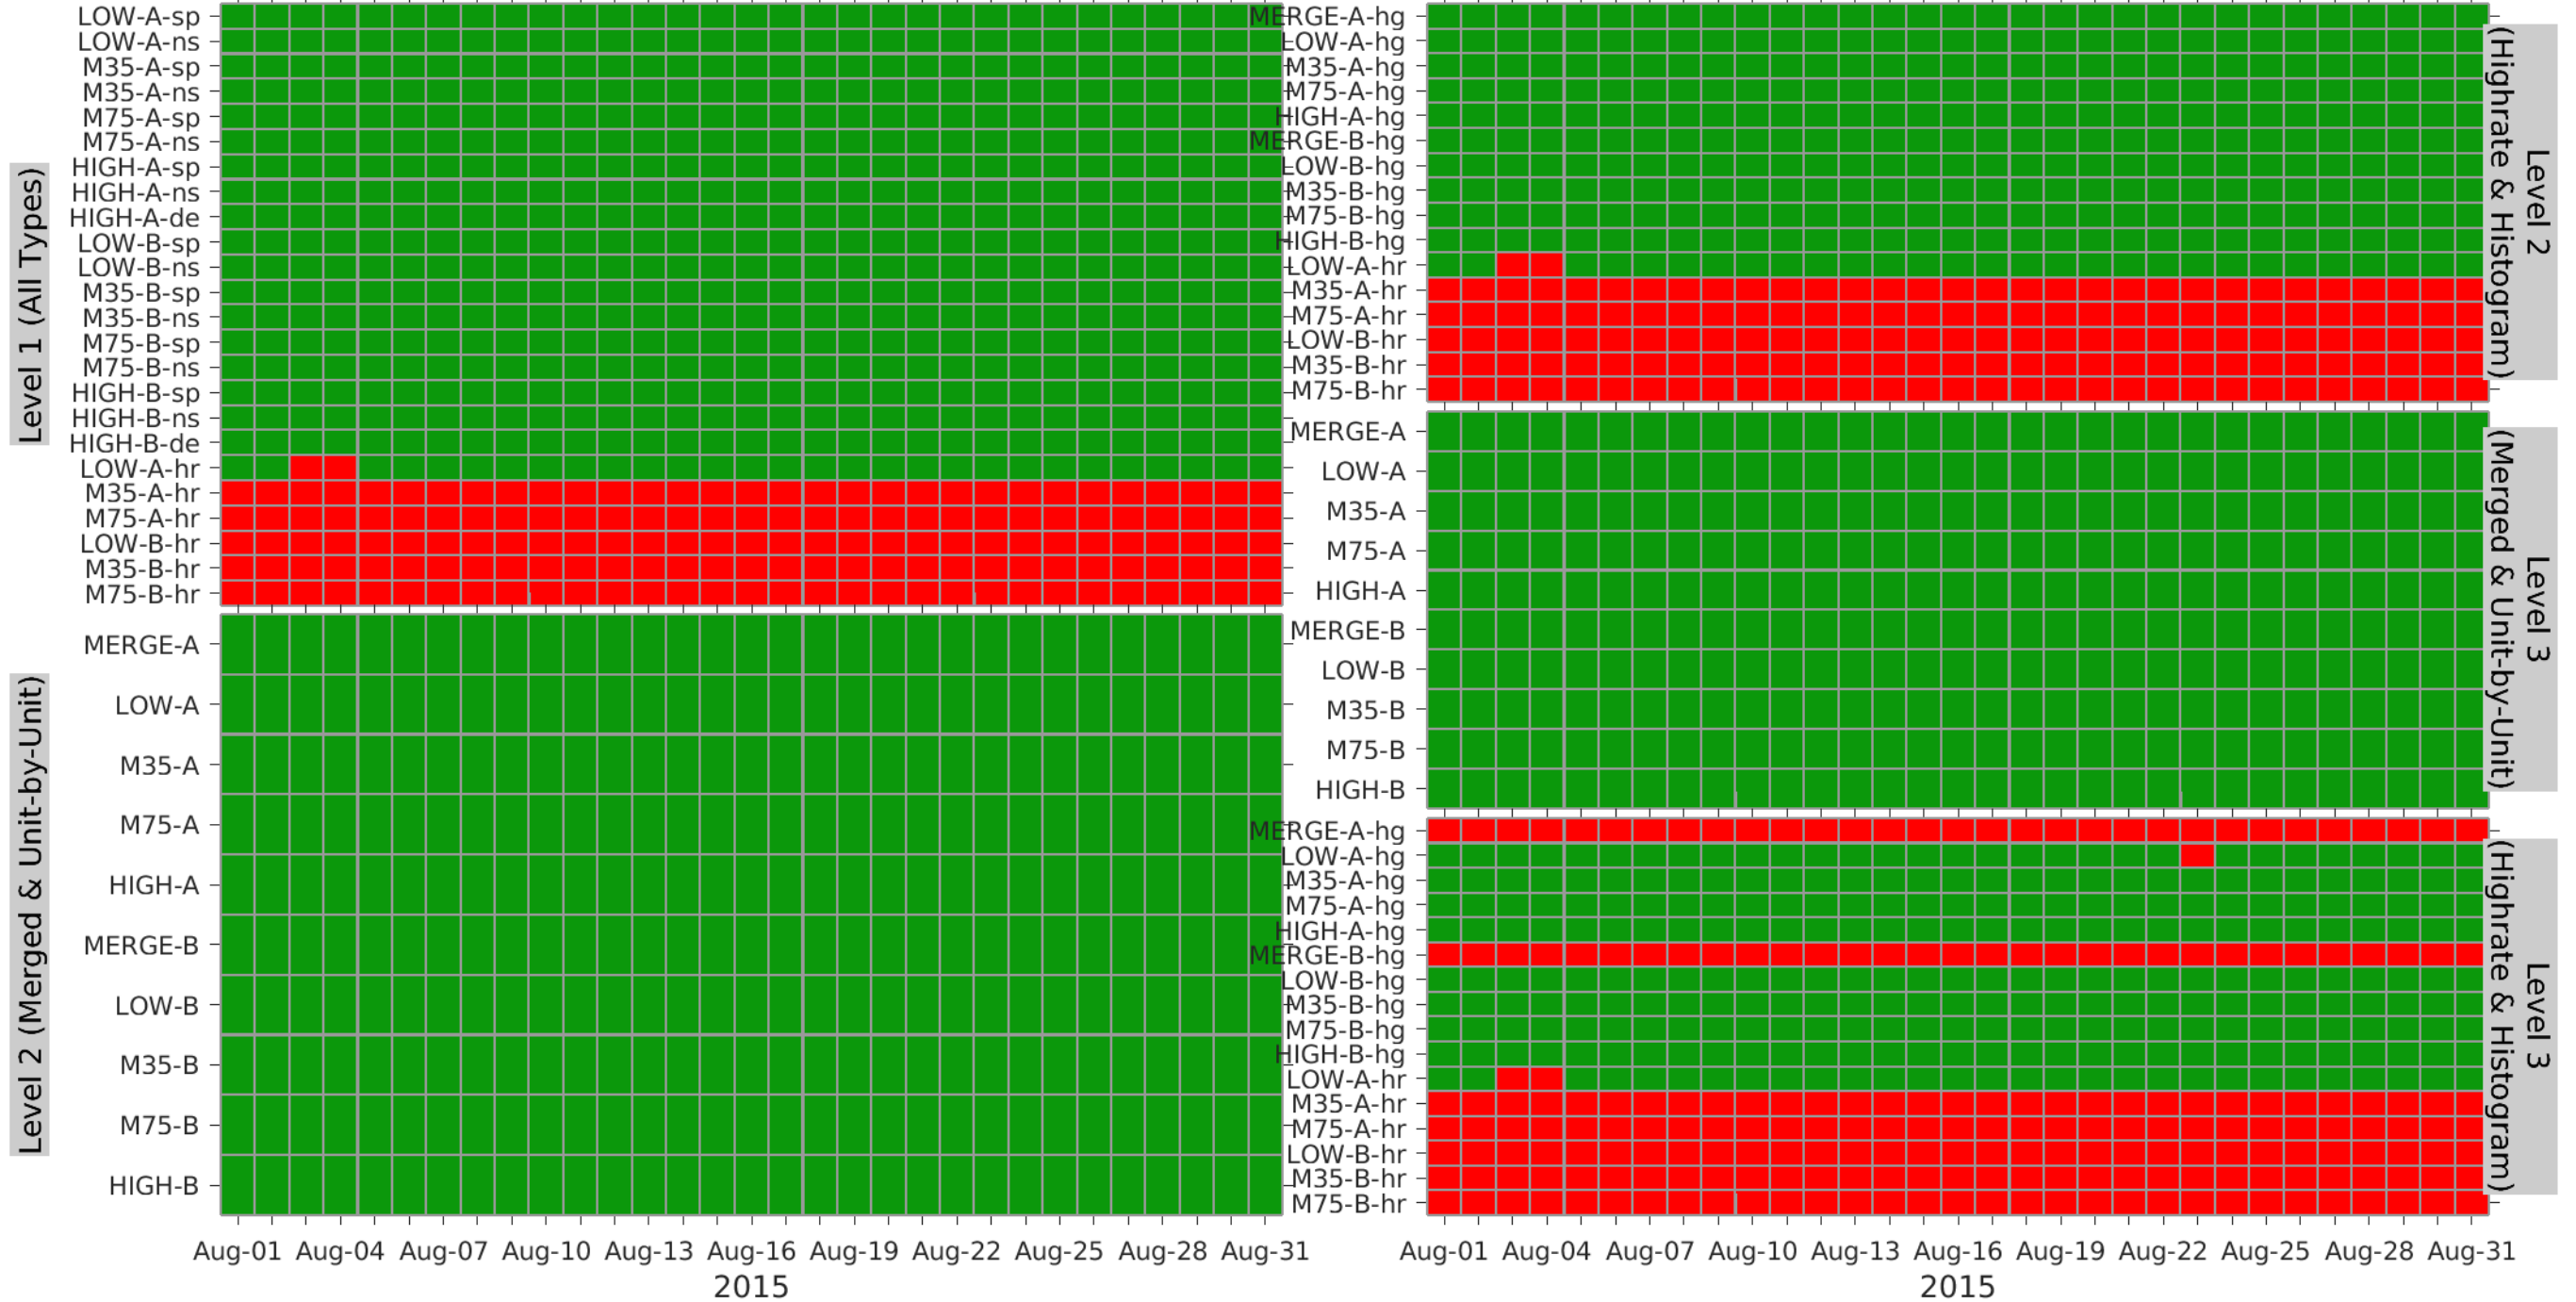

MagEIS Data Files | Created on: 2021/10/21 | Green = File Exists | Red = File Does Not Exist

sp=spin-based (science) | ns=non-science (housekeeping & status) | hr=highrate (LOW/MED only) | hg=histogram | de=direct event (HIGH only)

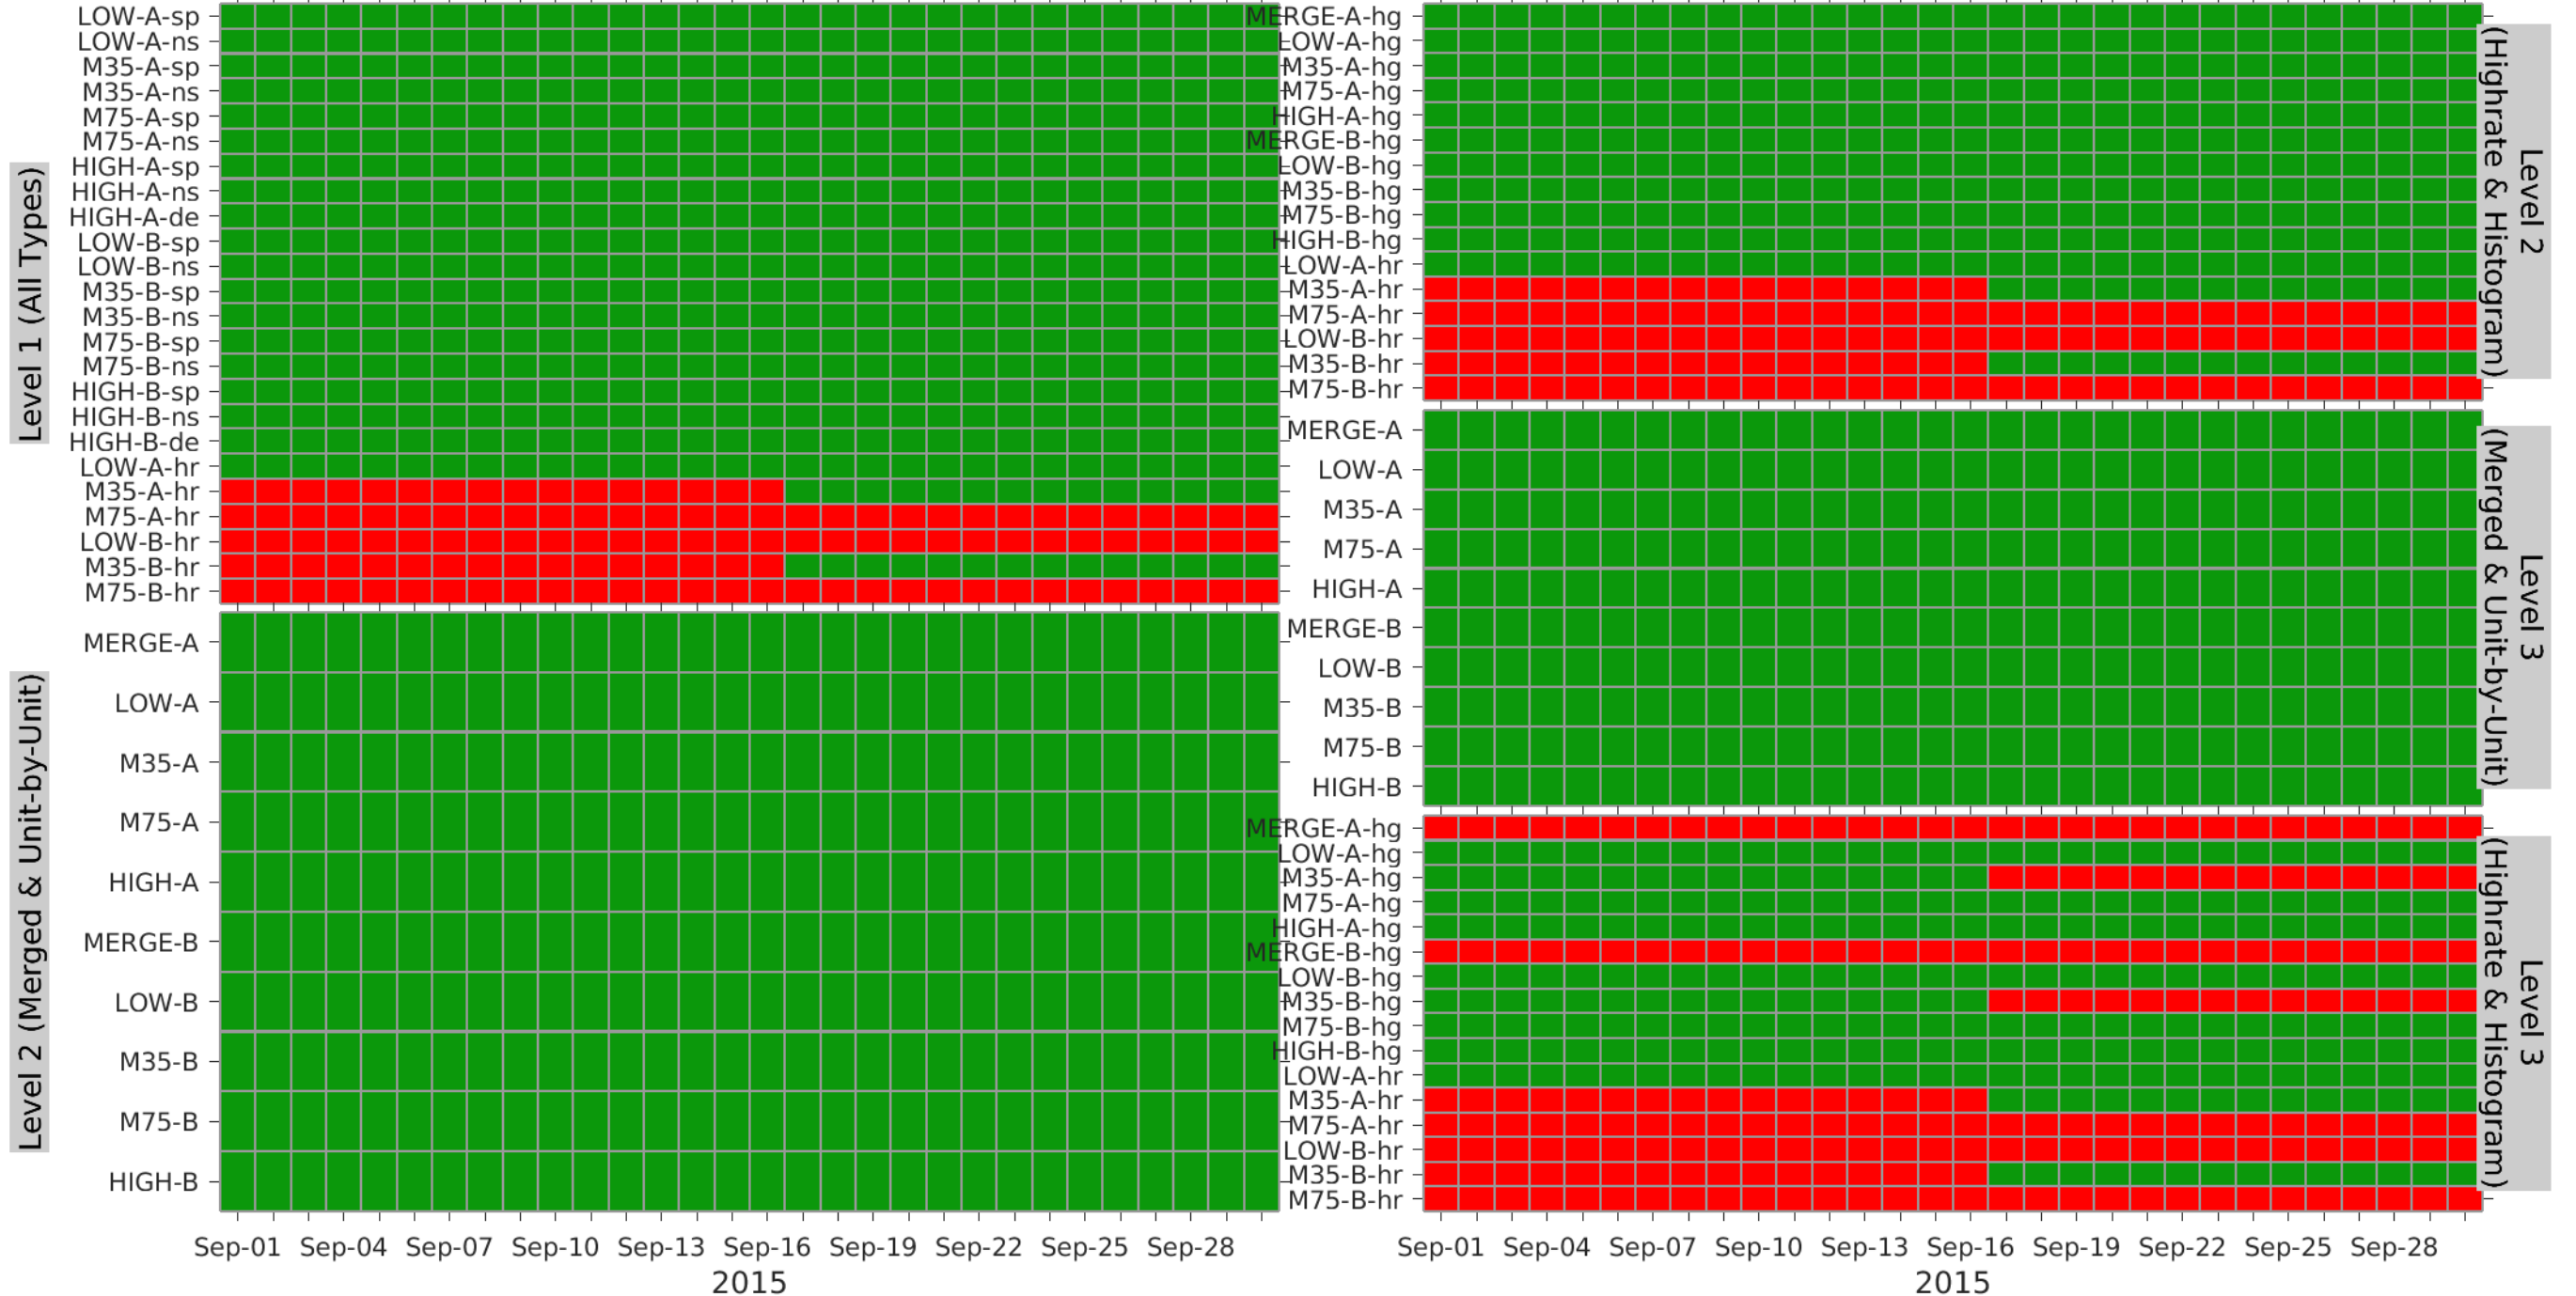

MagEIS Data Files | Created on: 2021/10/21 | Green = File Exists | Red = File Does Not Exist

sp=spin-based (science) | ns=non-science (housekeeping & status) | hr=highrate (LOW/MED only) | hg=histogram | de=direct event (HIGH only)

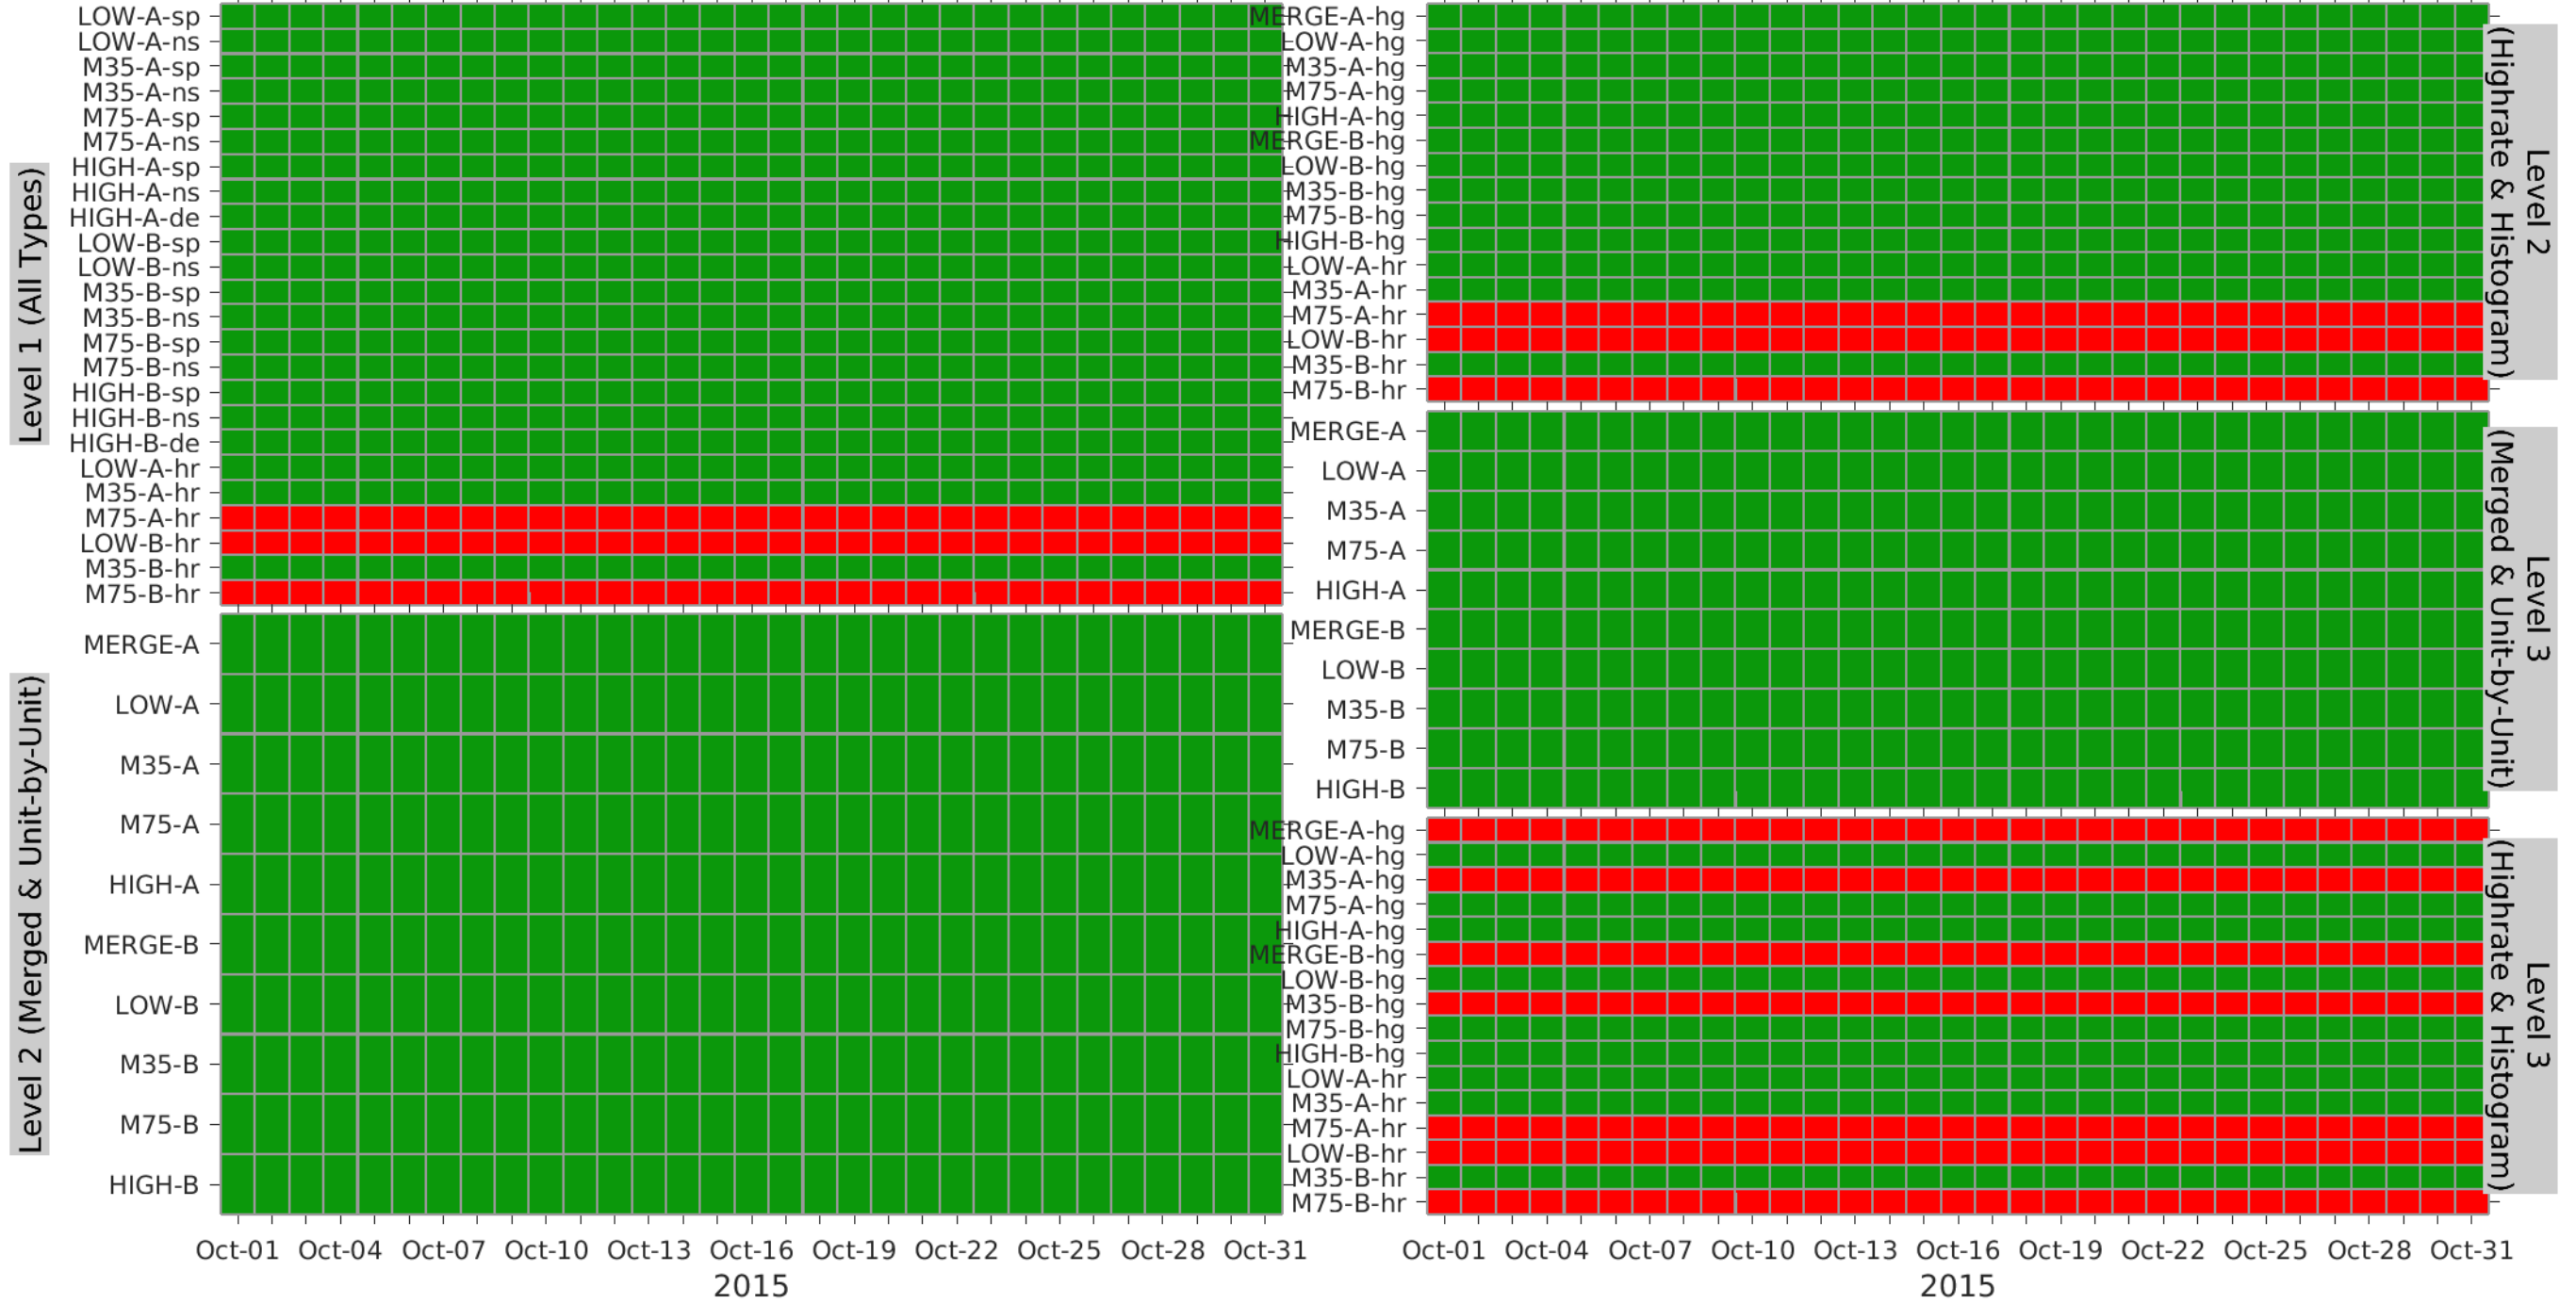

MagEIS Data Files | Created on: 2021/10/21 | Green = File Exists | Red = File Does Not Exist

sp=spin-based (science) | ns=non-science (housekeeping & status) | hr=highrate (LOW/MED only) | hg=histogram | de=direct event (HIGH only)

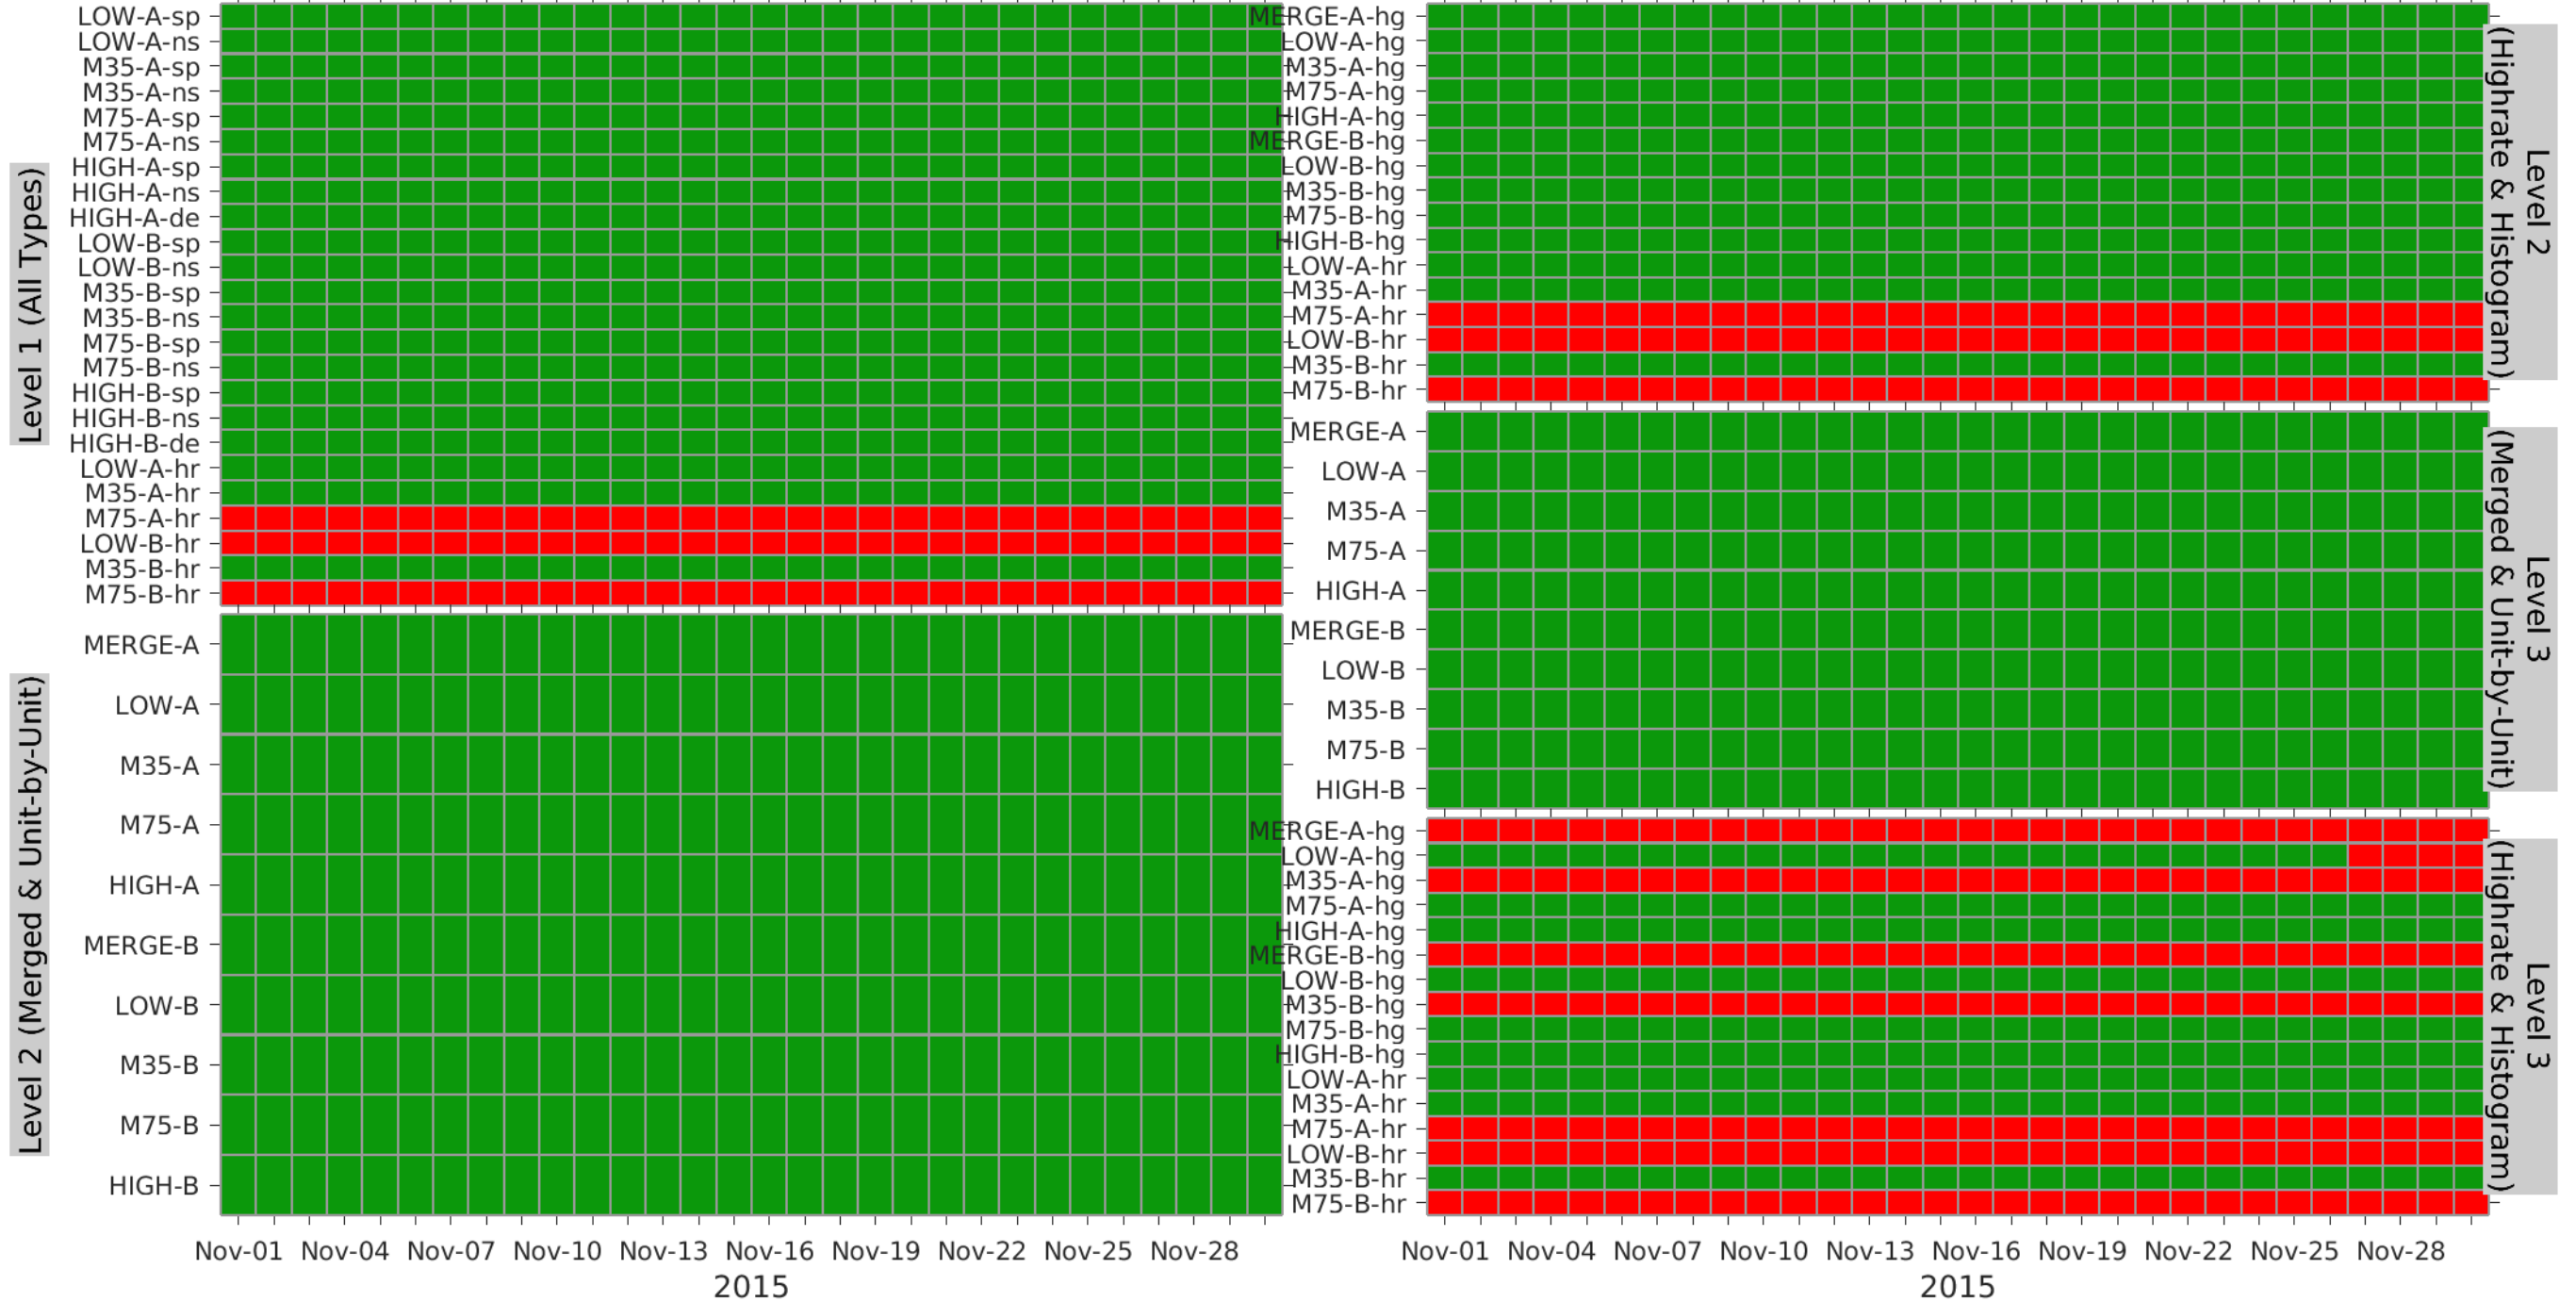



MagEIS Data Files | Created on: 2021/10/21 | Green = File Exists | Red = File Does Not Exist

sp=spin-based (science) | ns=non-science (housekeeping & status) | hr=highrate (LOW/MED only) | hg=histogram | de=direct event (HIGH only)

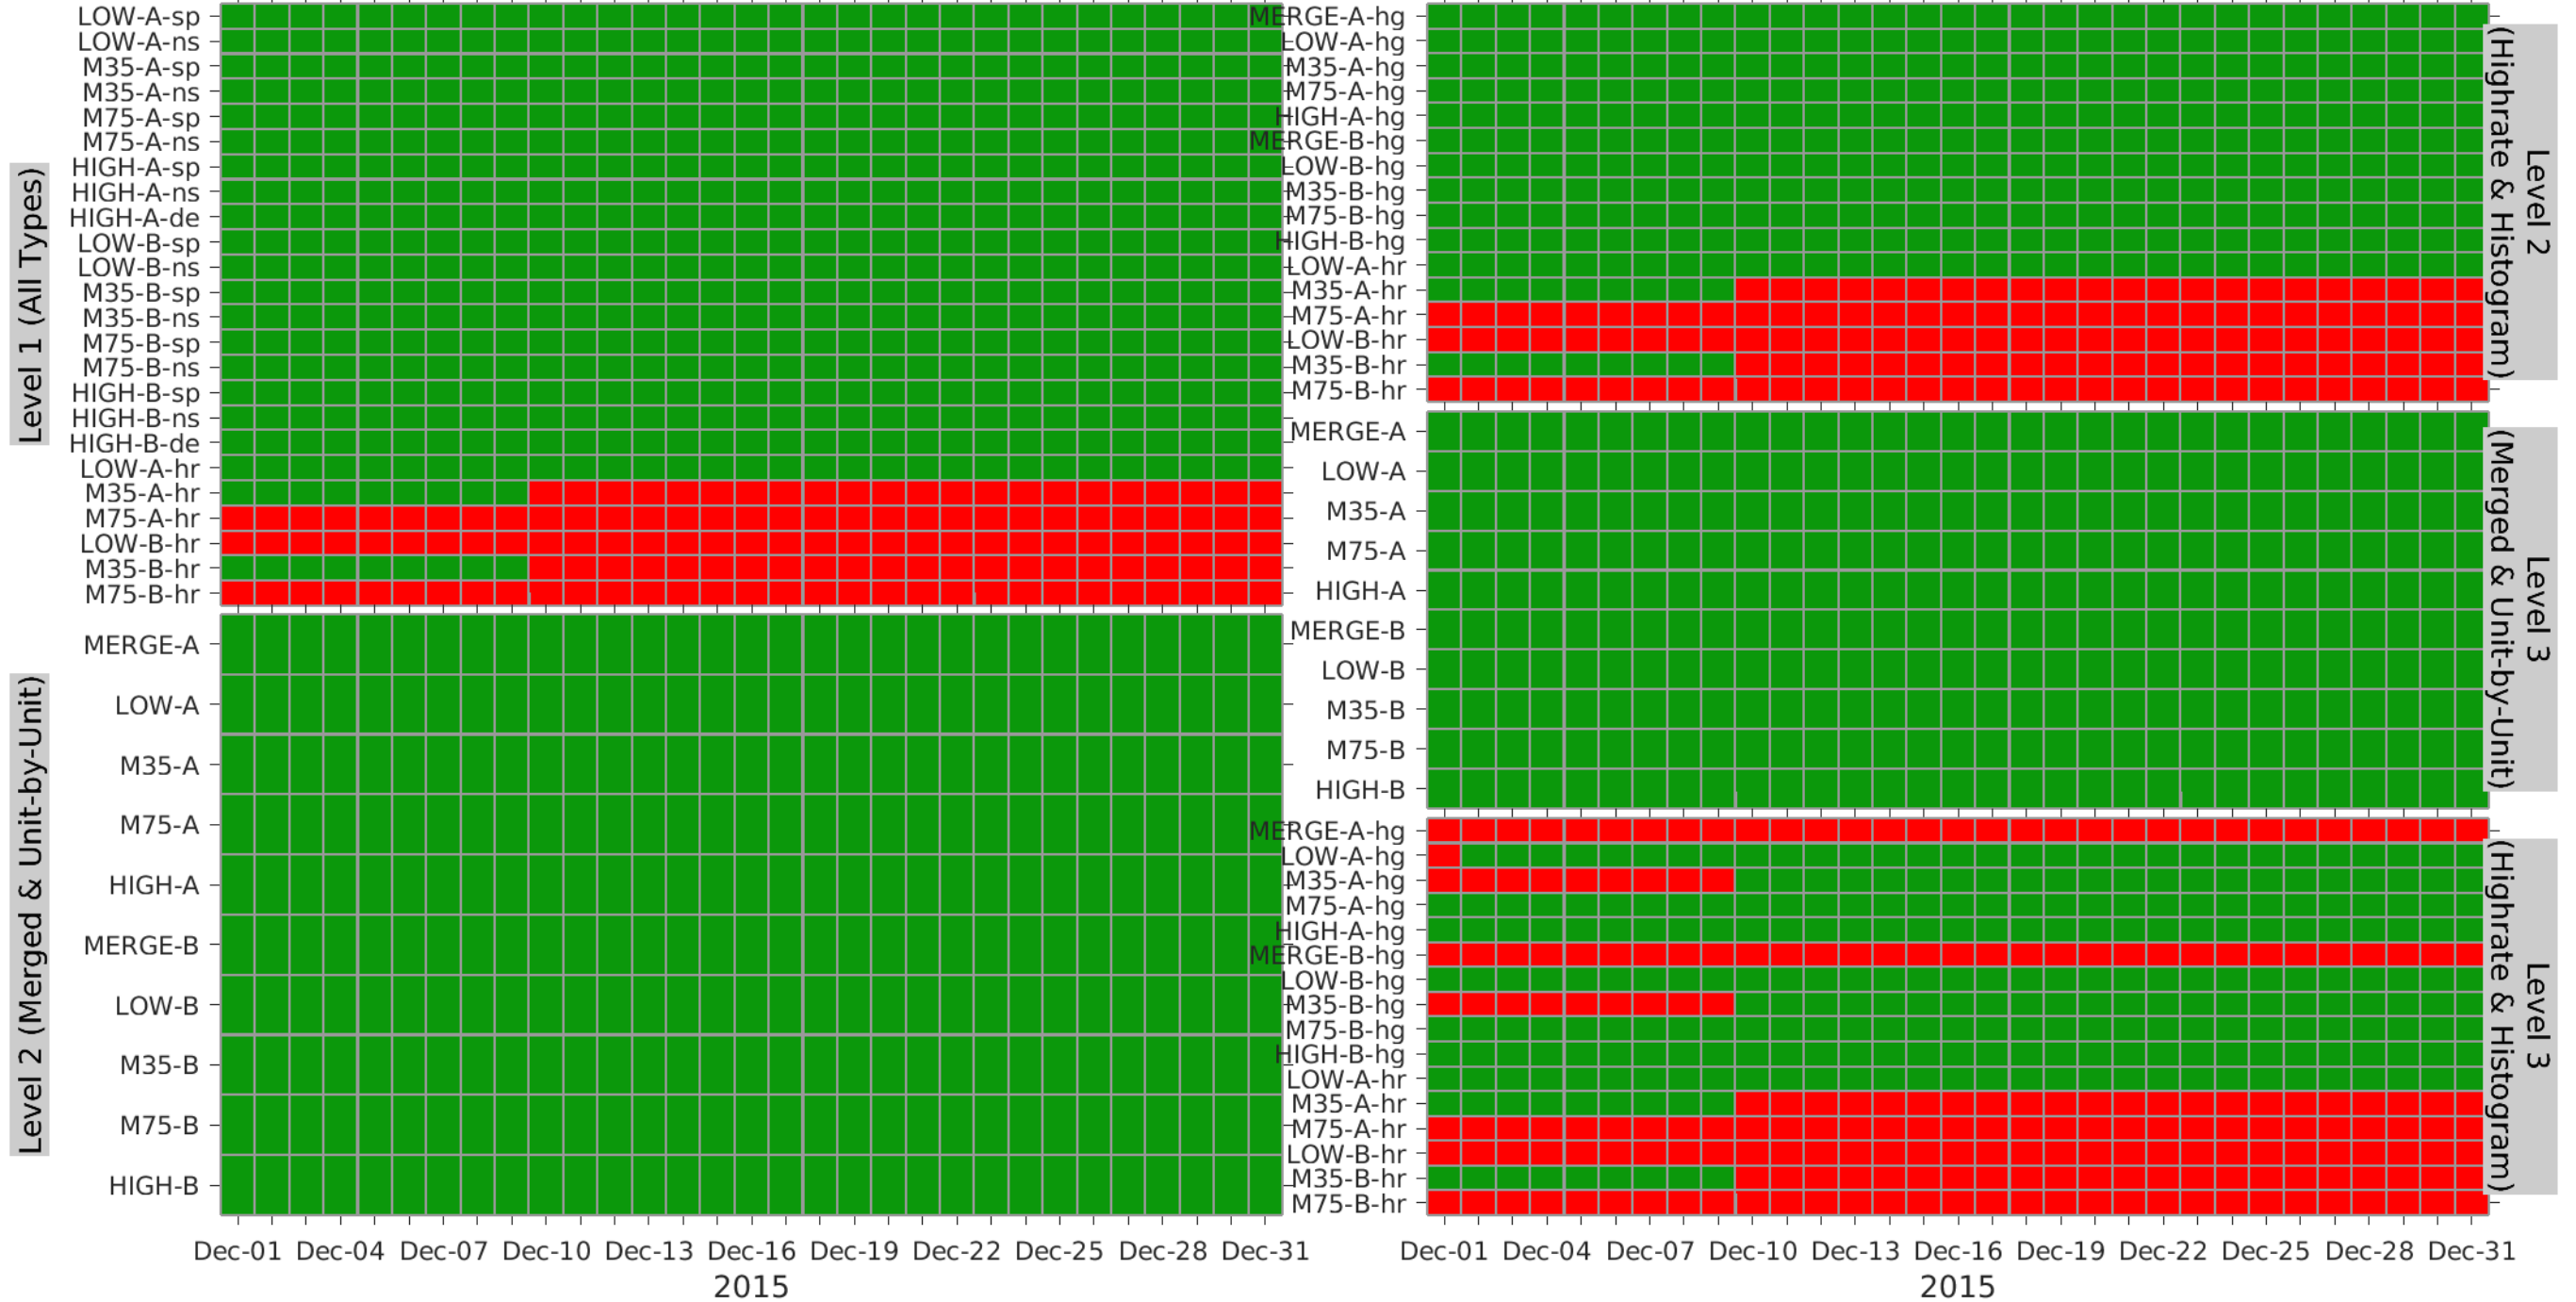

MagEIS Data Files | Created on: 2021/10/21 | Green = File Exists | Red = File Does Not Exist

sp=spin-based (science) | ns=non-science (housekeeping & status) | hr=highrate (LOW/MED only) | hg=histogram | de=direct event (HIGH only)

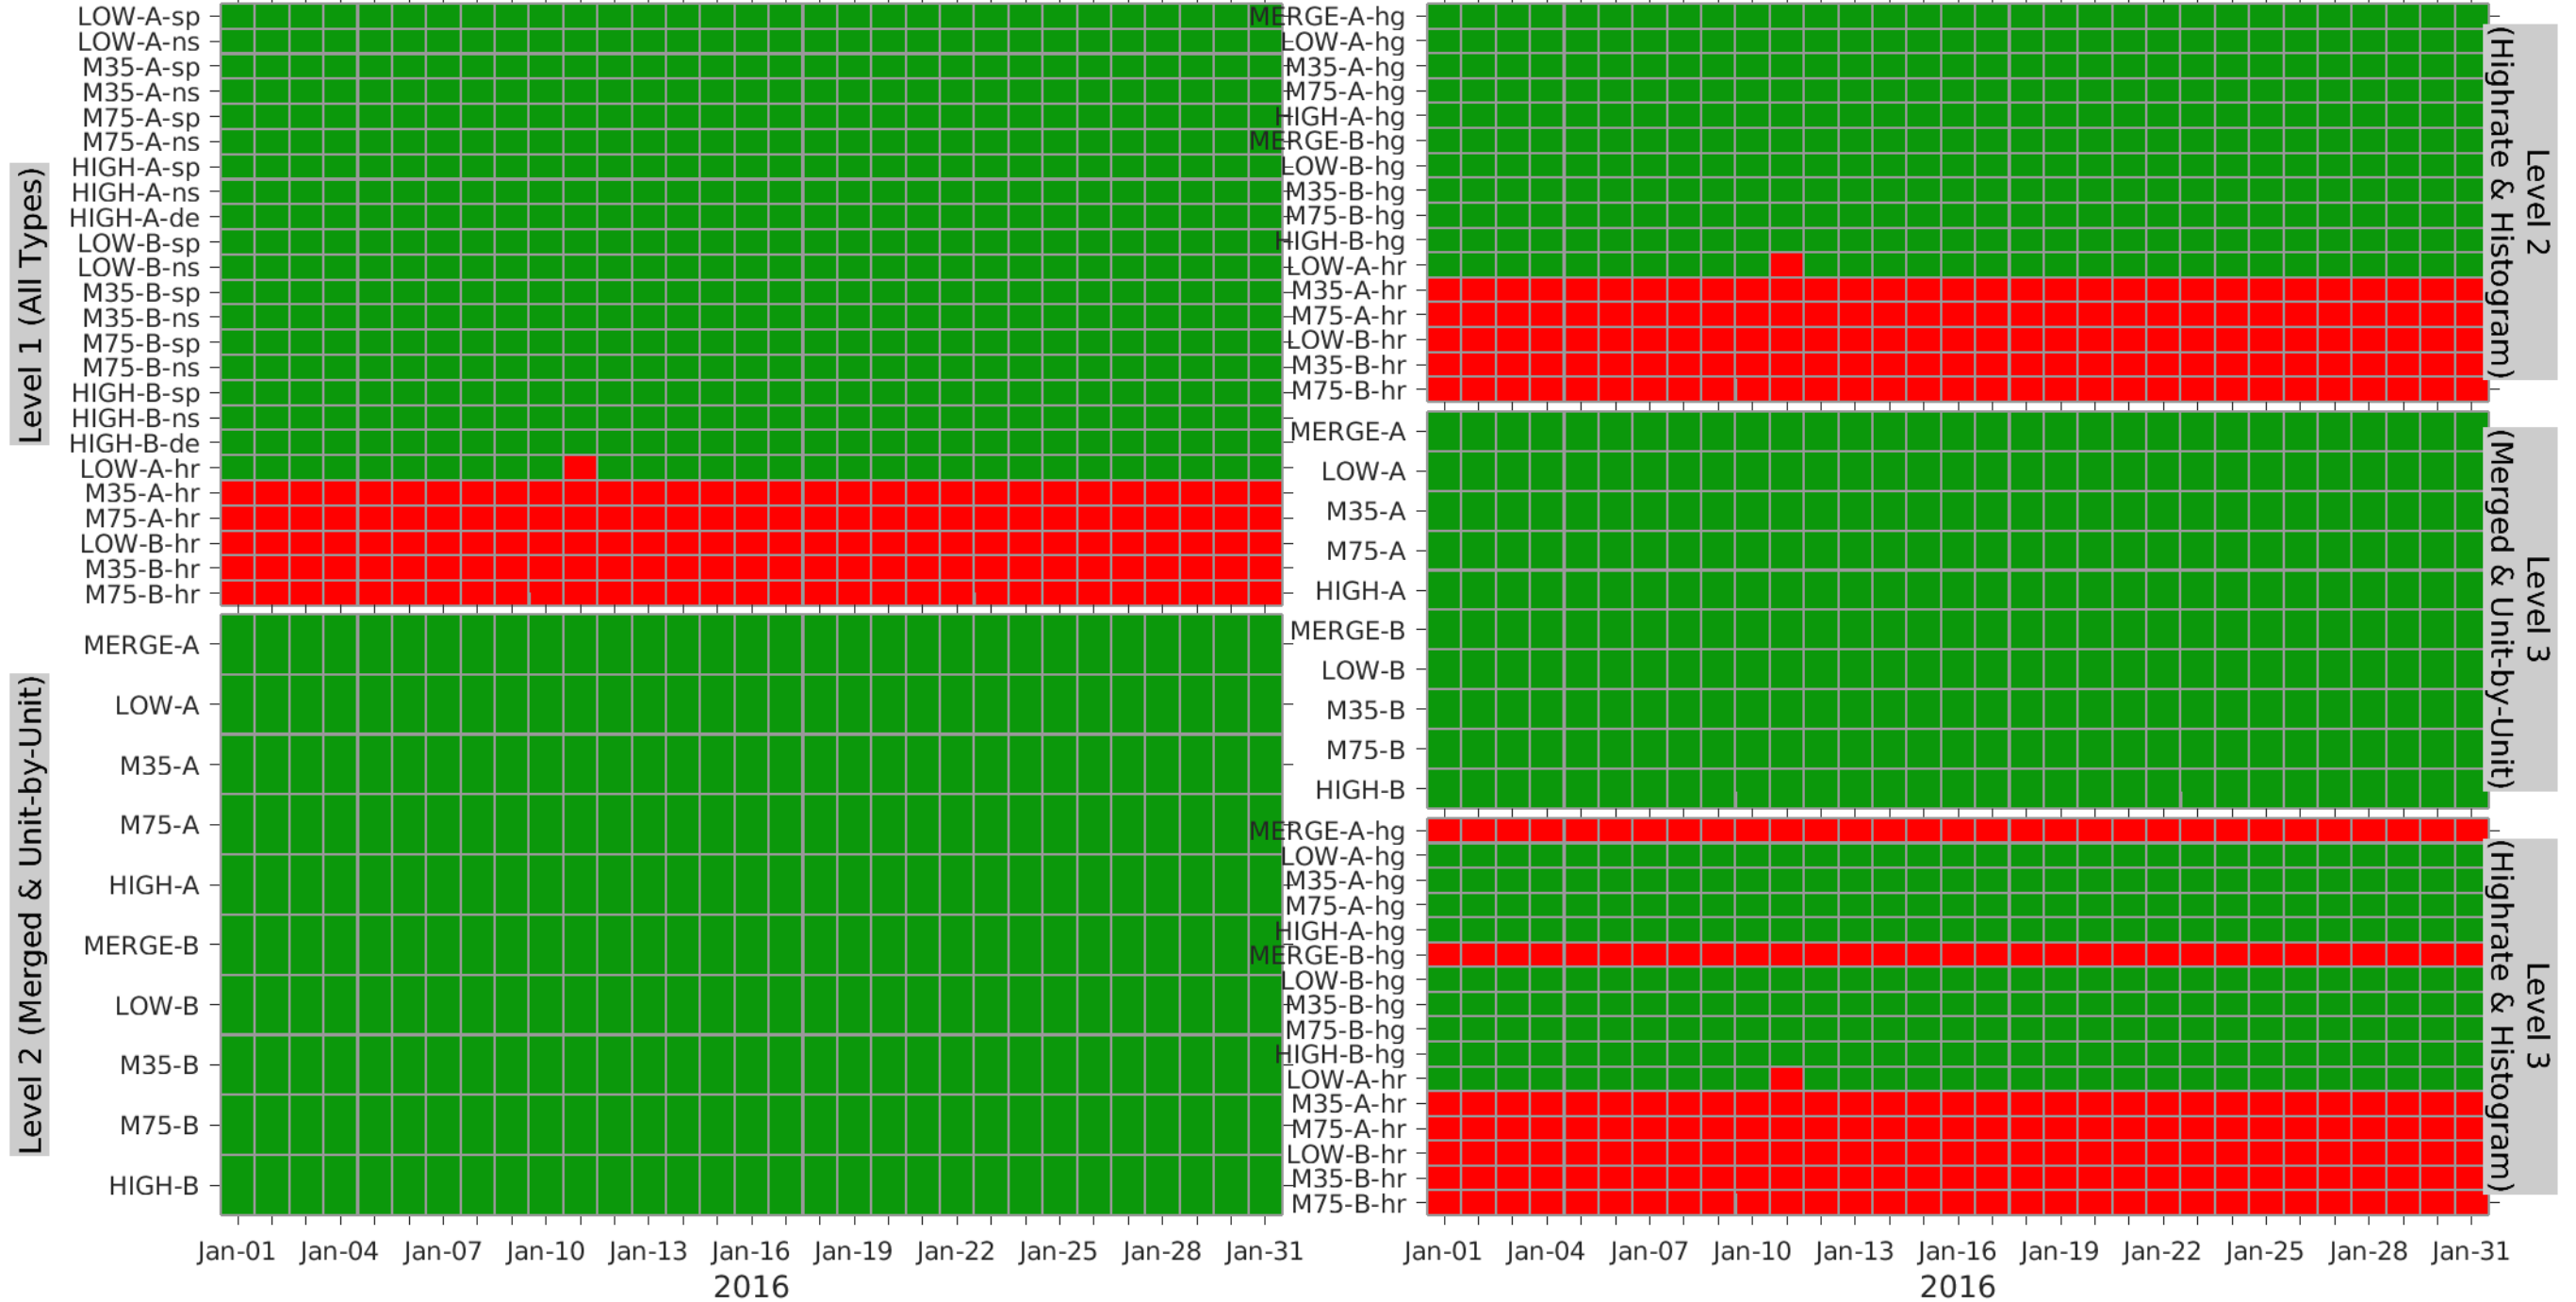

MagEIS Data Files | Created on: 2021/10/21 | Green = File Exists | Red = File Does Not Exist

sp=spin-based (science) | ns=non-science (housekeeping & status) | hr=highrate (LOW/MED only) | hg=histogram | de=direct event (HIGH only)

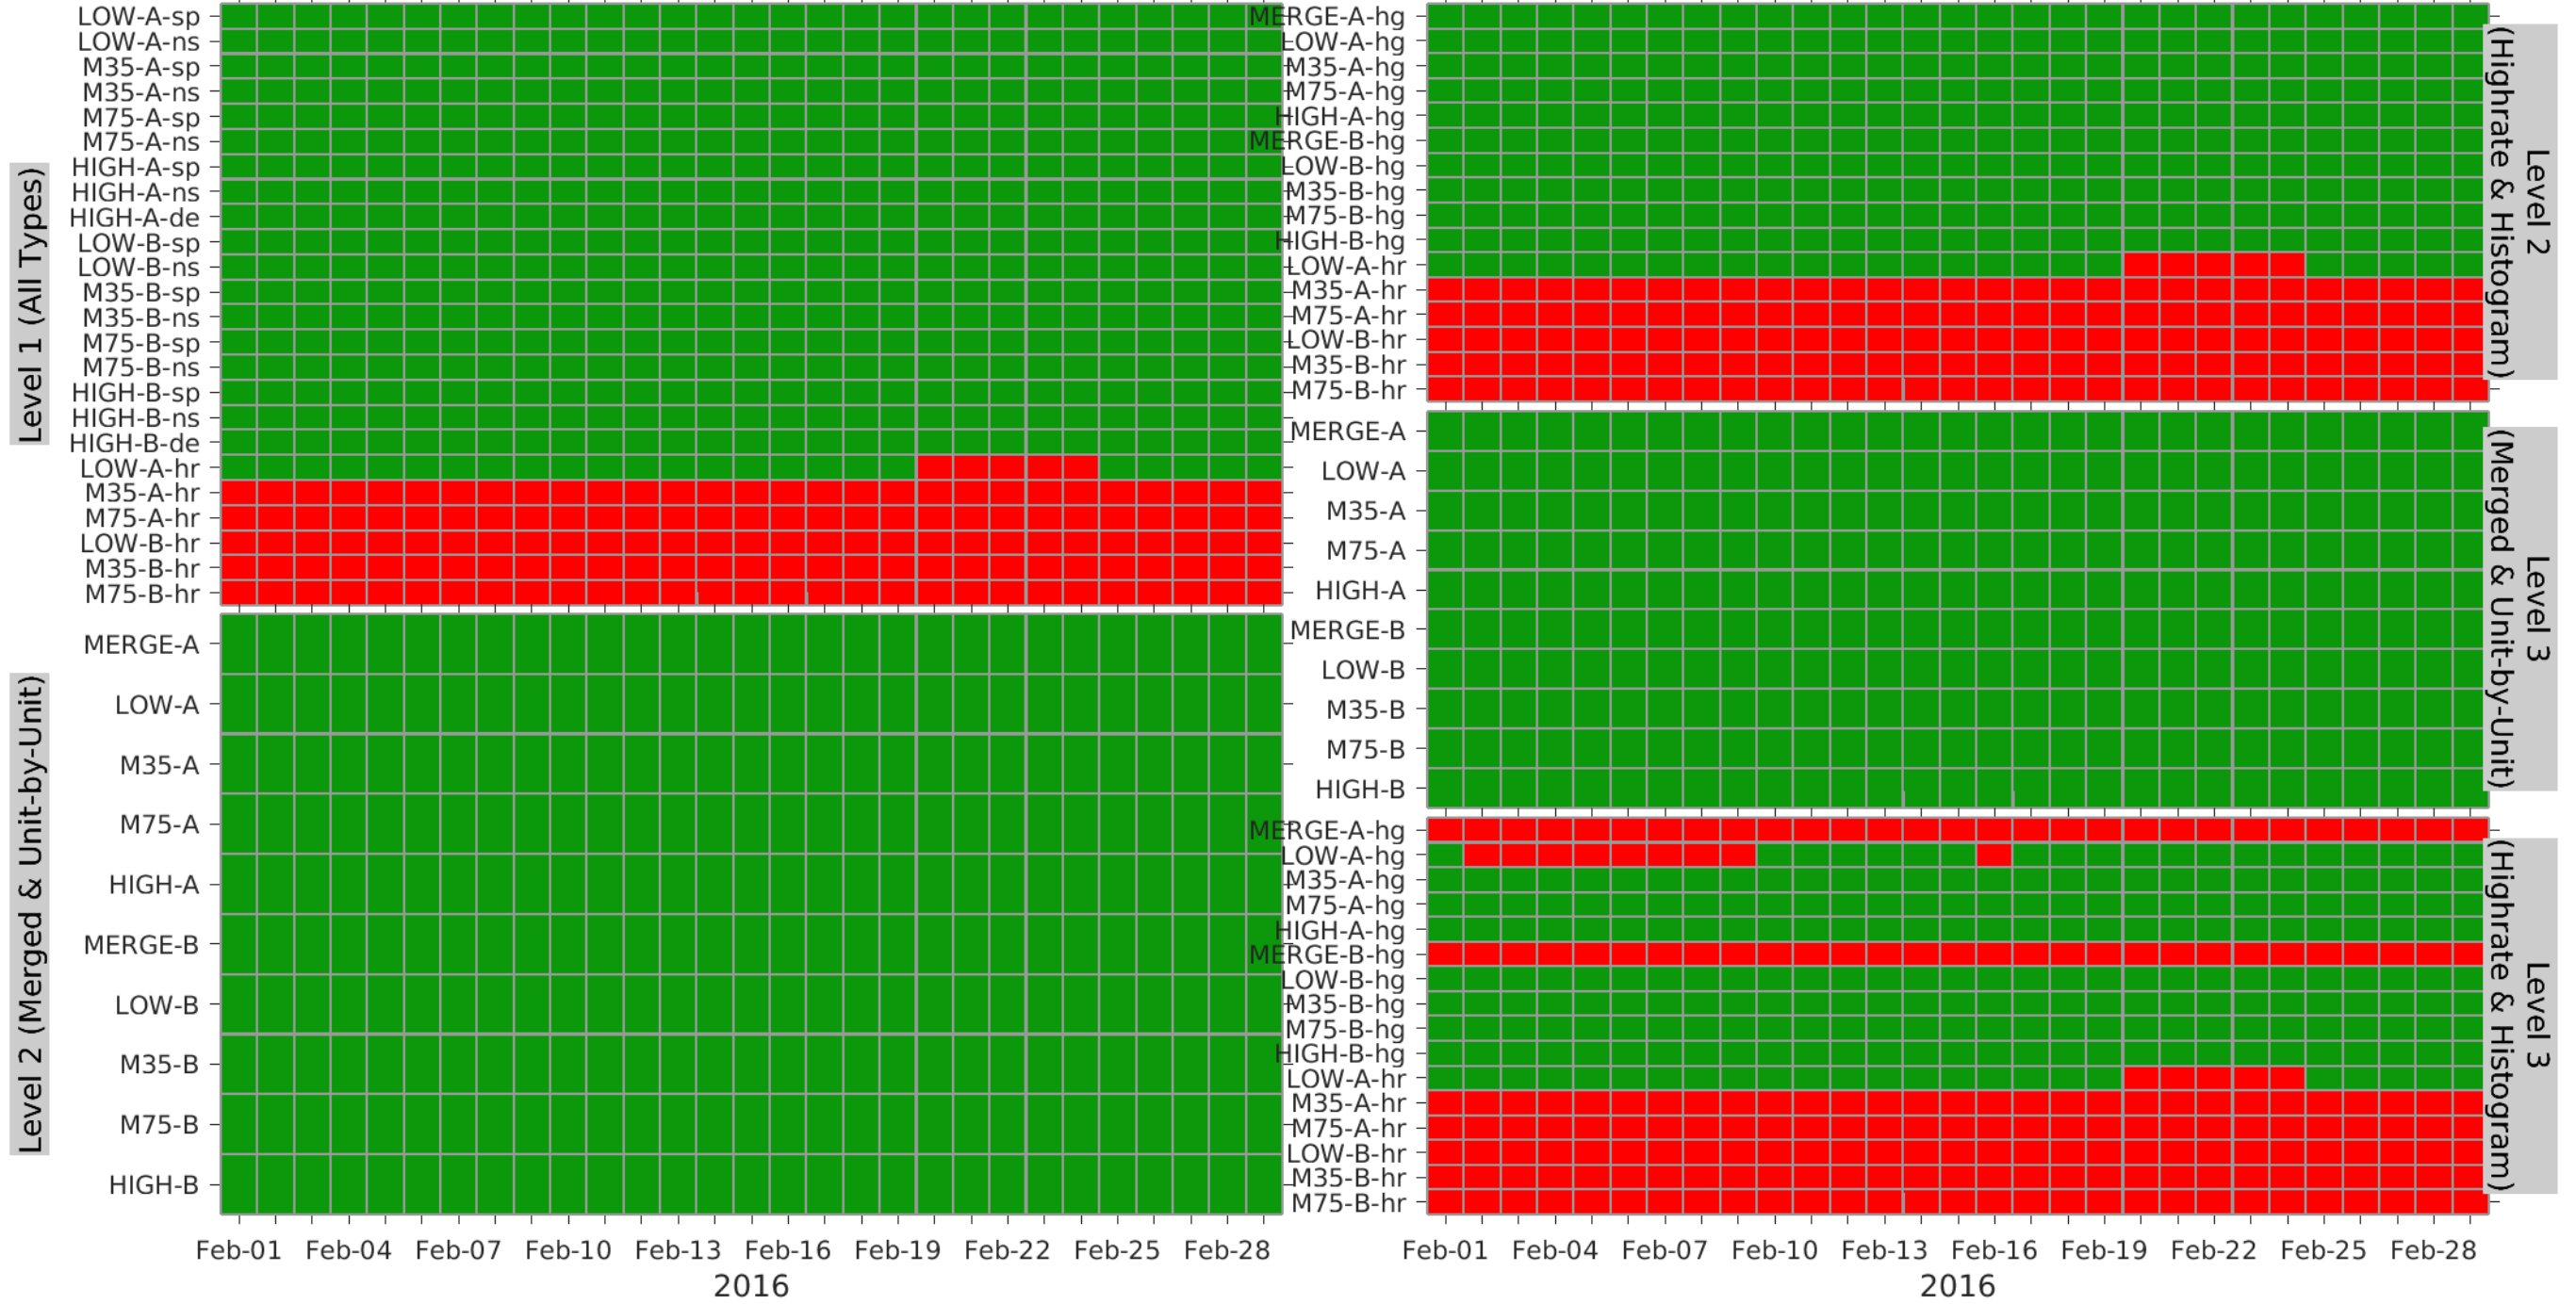

MagEIS Data Files | Created on: 2021/10/21 | Green = File Exists | Red = File Does Not Exist

sp=spin-based (science) | ns=non-science (housekeeping & status) | hr=highrate (LOW/MED only) | hg=histogram | de=direct event (HIGH only)

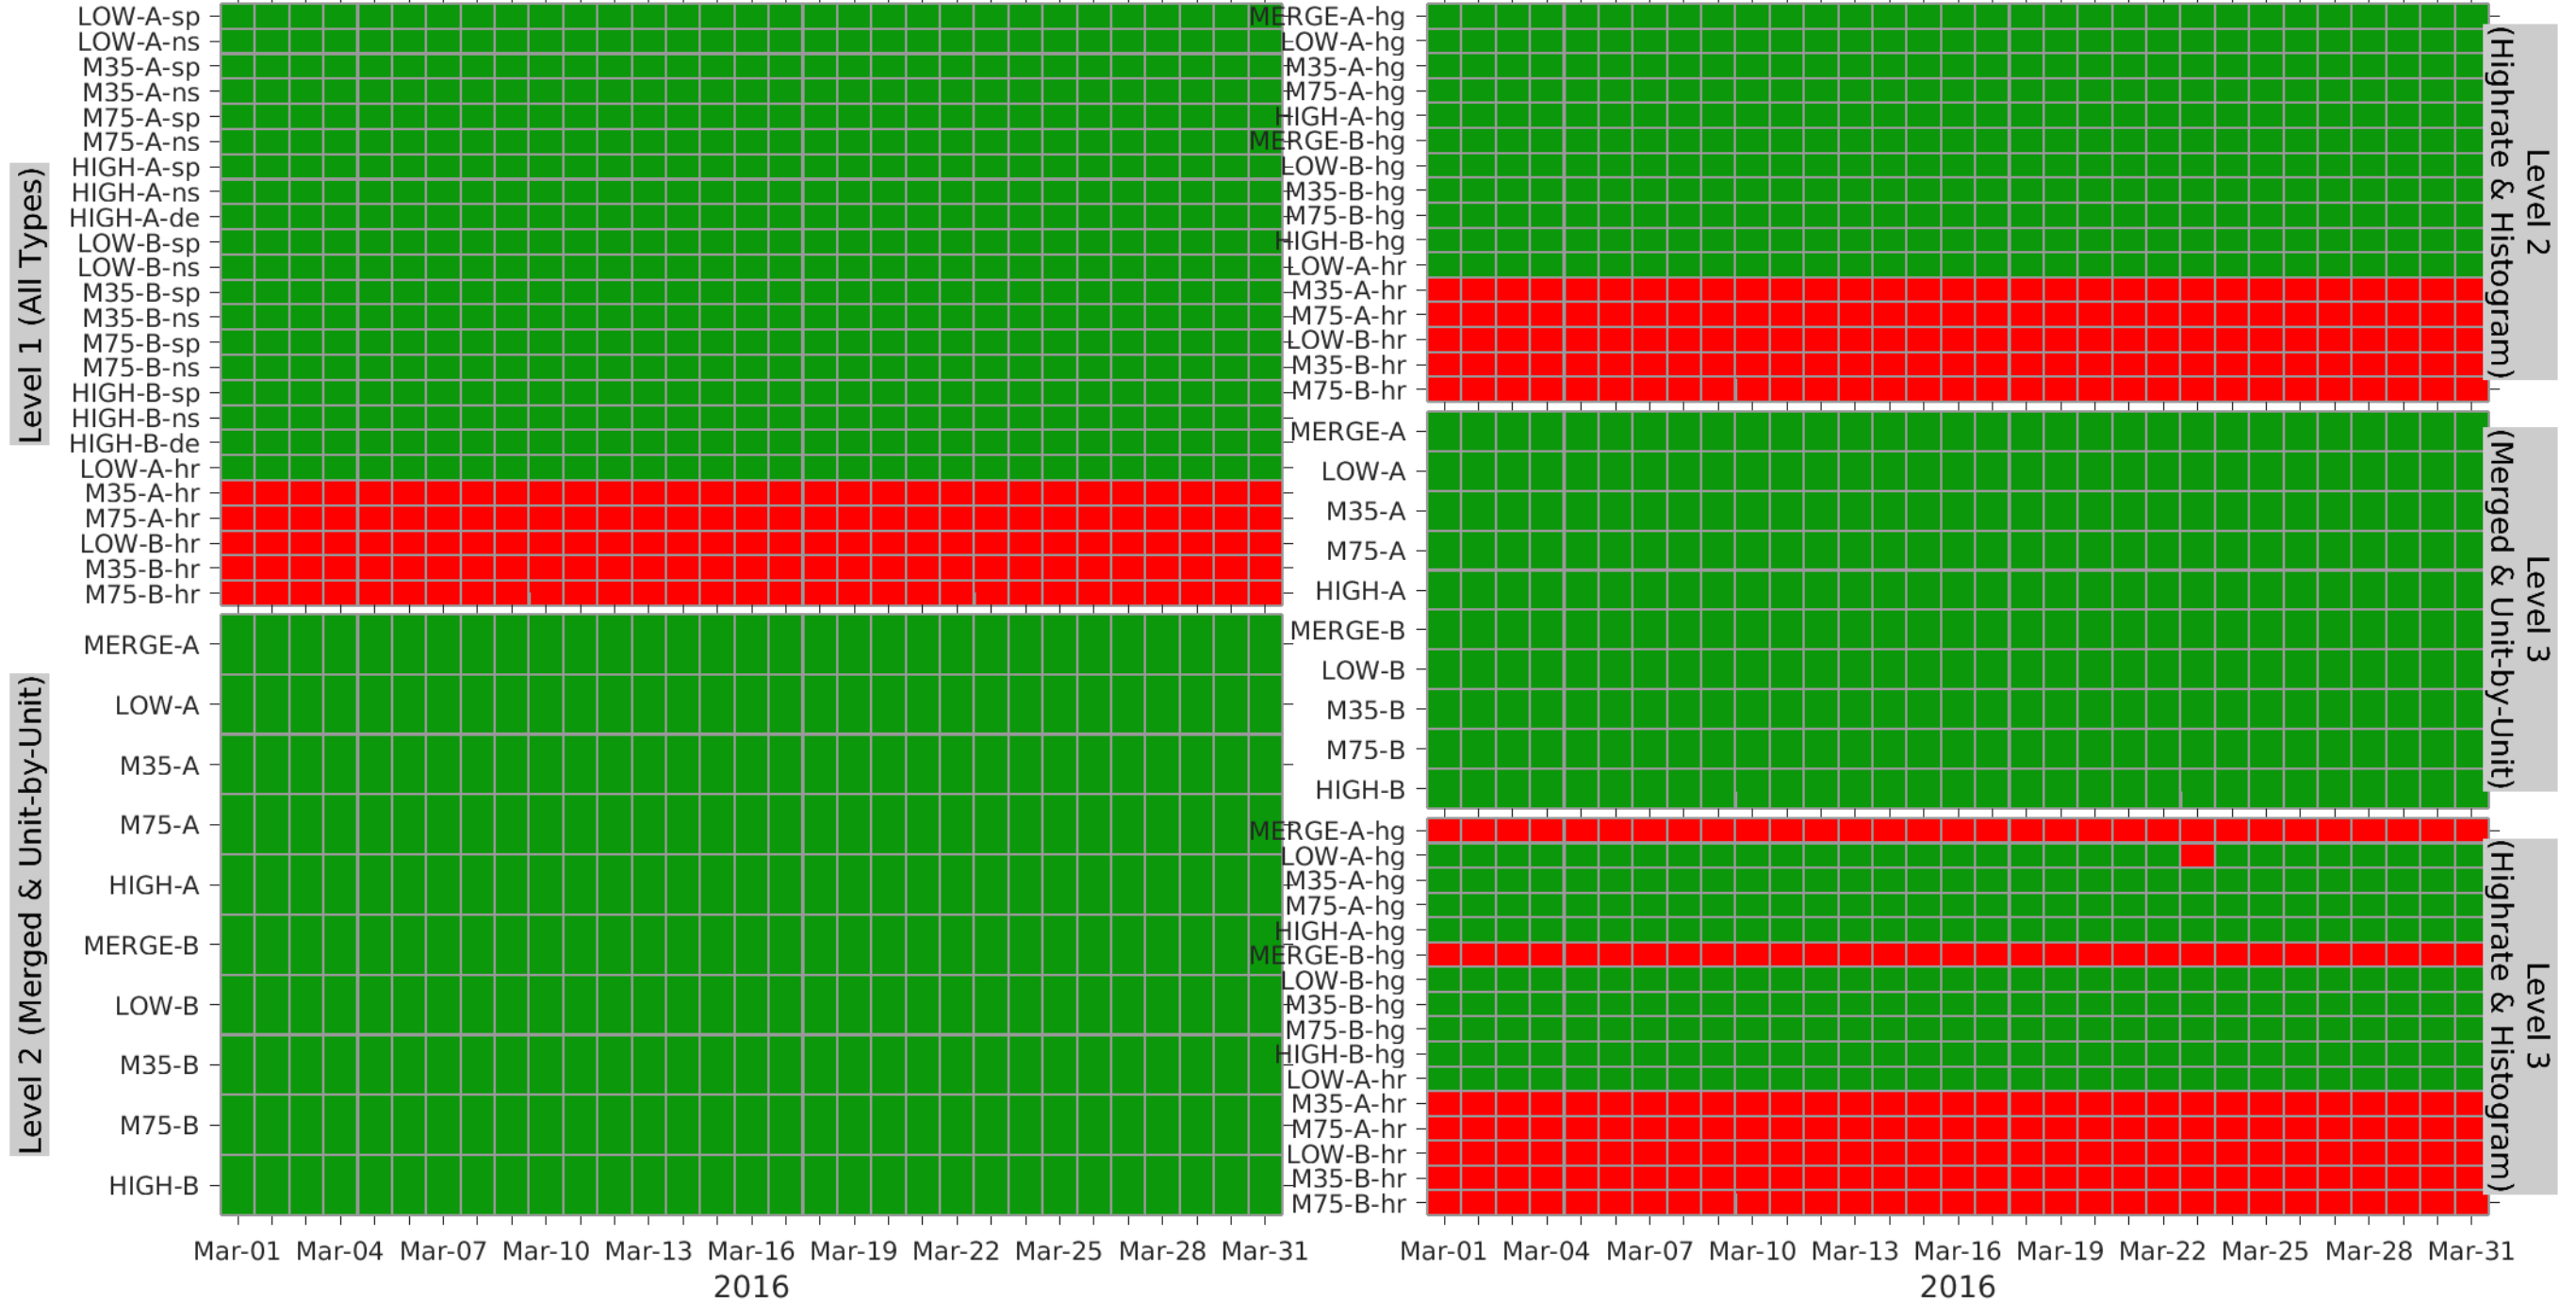

**MagEIS Data Files | Created on: 2021/10/21 | Green = File Exists | Red = File Does Not Exist**

**sp=spin-based (science) | ns=non-science (housekeeping & status) | hr=highrate (LOW/MED only) | hg=histogram | de=direct event (HIGH only)**

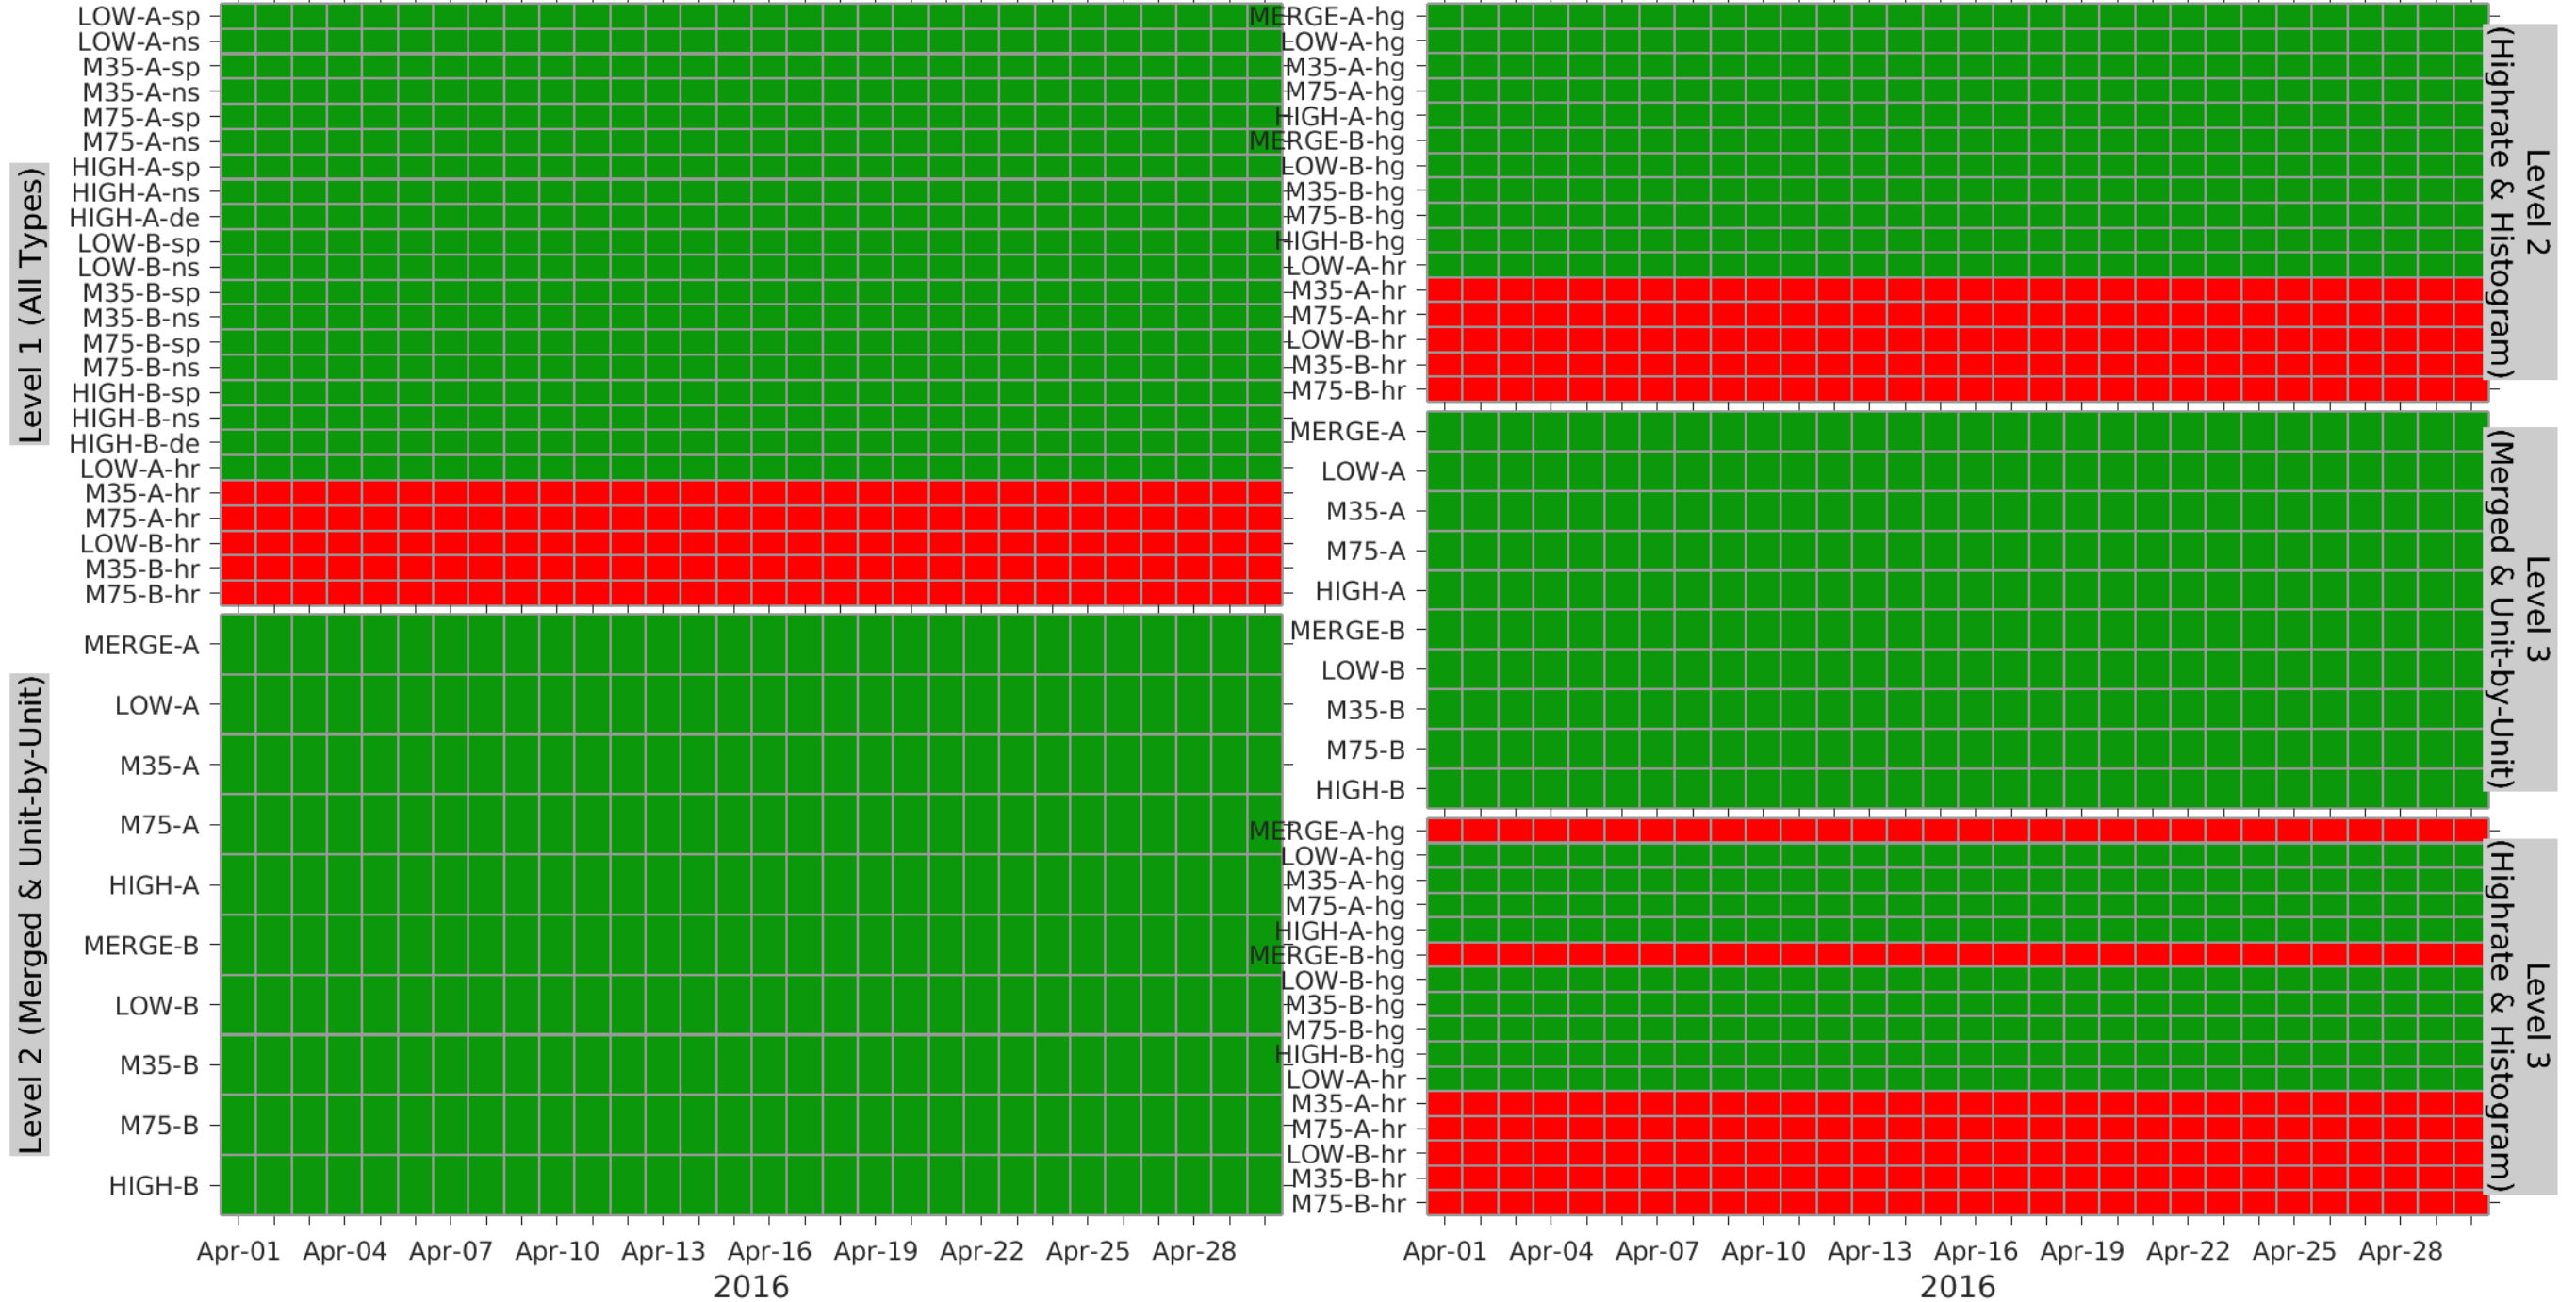

MagEIS Data Files | Created on: 2021/10/21 | Green = File Exists | Red = File Does Not Exist

sp=spin-based (science) | ns=non-science (housekeeping & status) | hr=highrate (LOW/MED only) | hg=histogram | de=direct event (HIGH only)

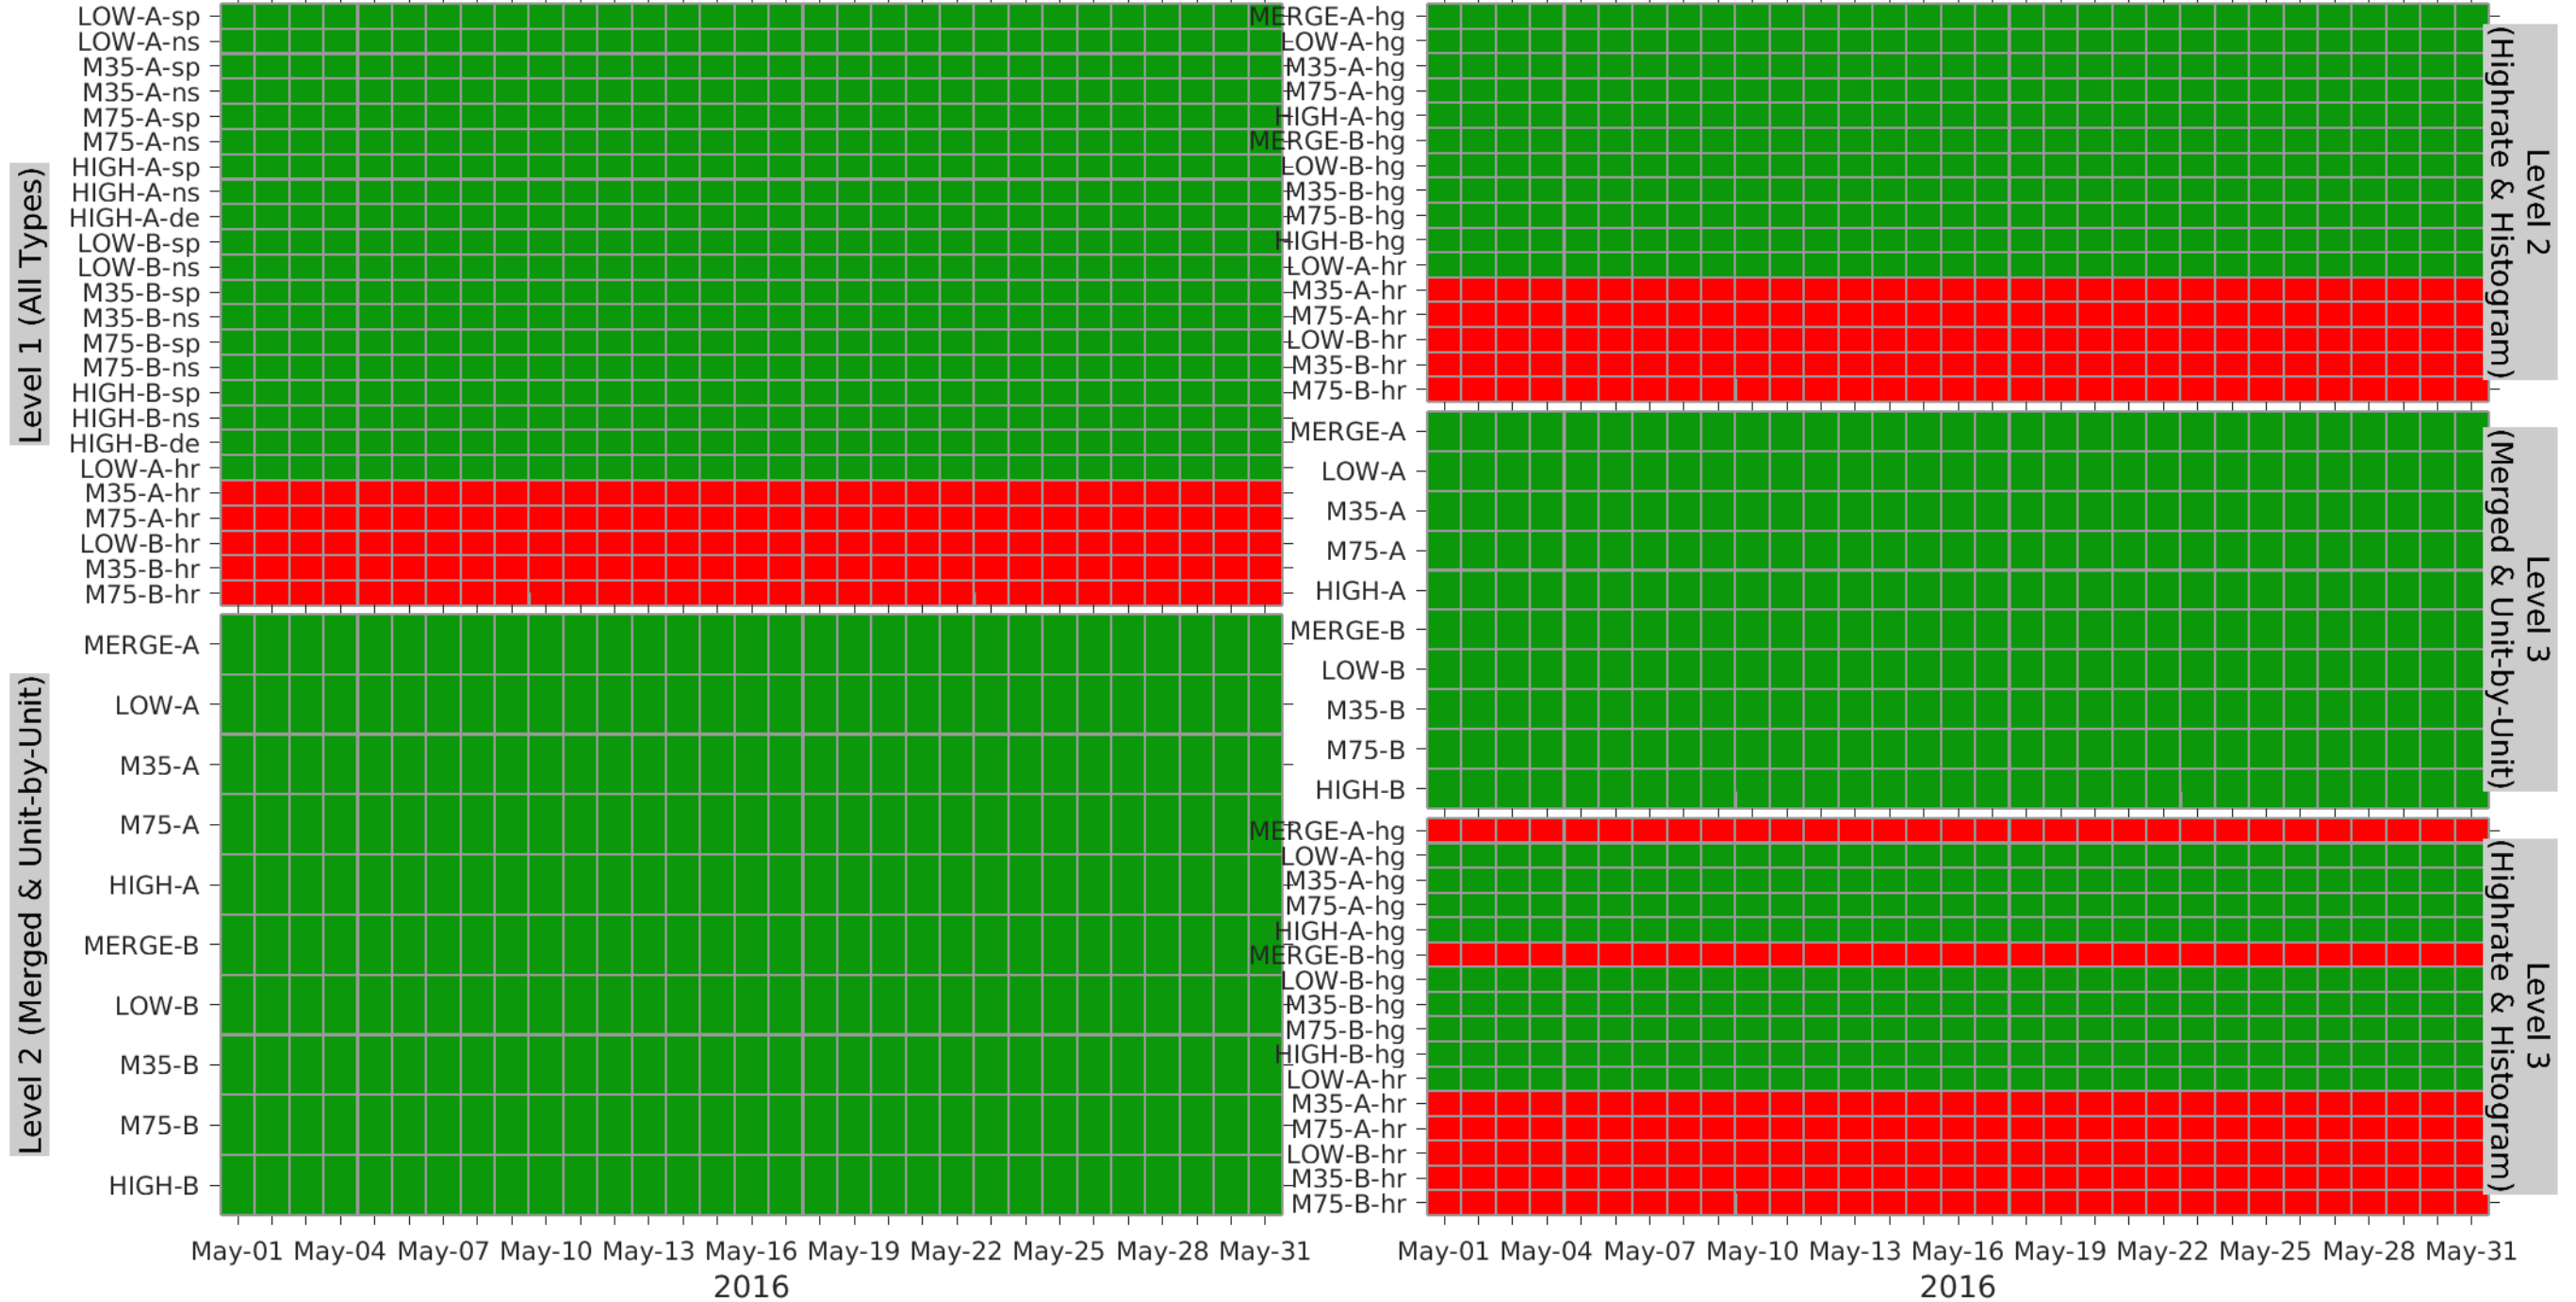

MagEIS Data Files | Created on: 2021/10/21 | Green = File Exists | Red = File Does Not Exist

sp=spin-based (science) | ns=non-science (housekeeping & status) | hr=highrate (LOW/MED only) | hg=histogram | de=direct event (HIGH only)

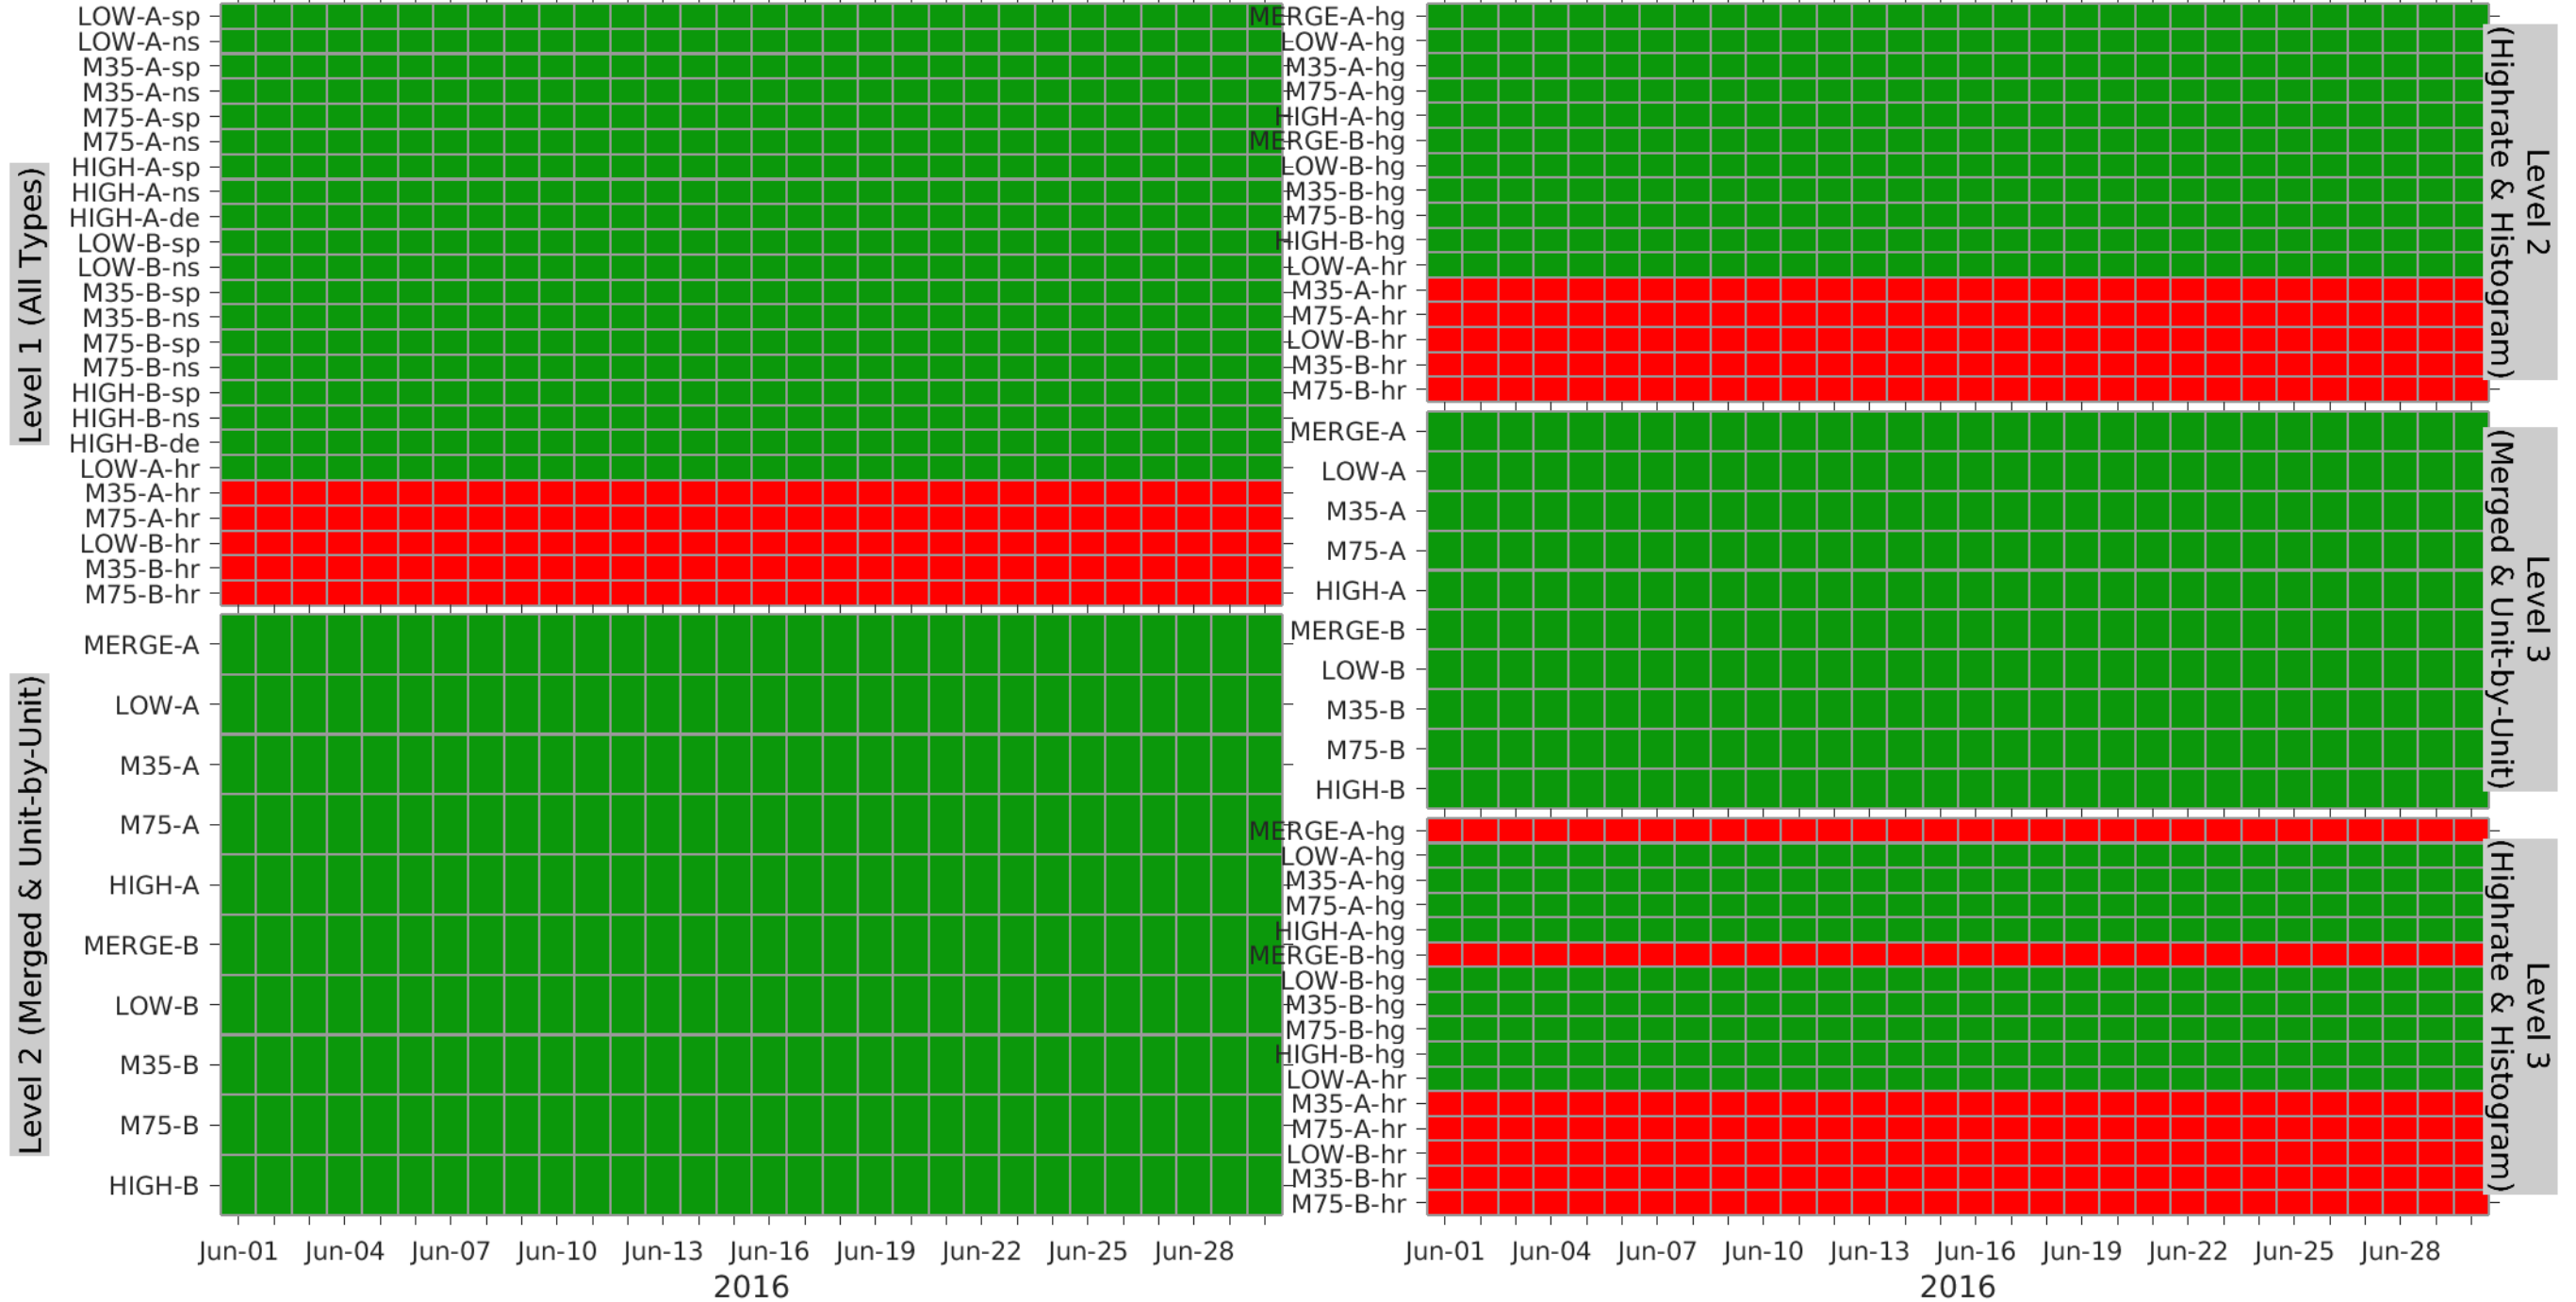

MagEIS Data Files | Created on: 2021/10/21 | Green = File Exists | Red = File Does Not Exist

sp=spin-based (science) | ns=non-science (housekeeping & status) | hr=highrate (LOW/MED only) | hg=histogram | de=direct event (HIGH only)

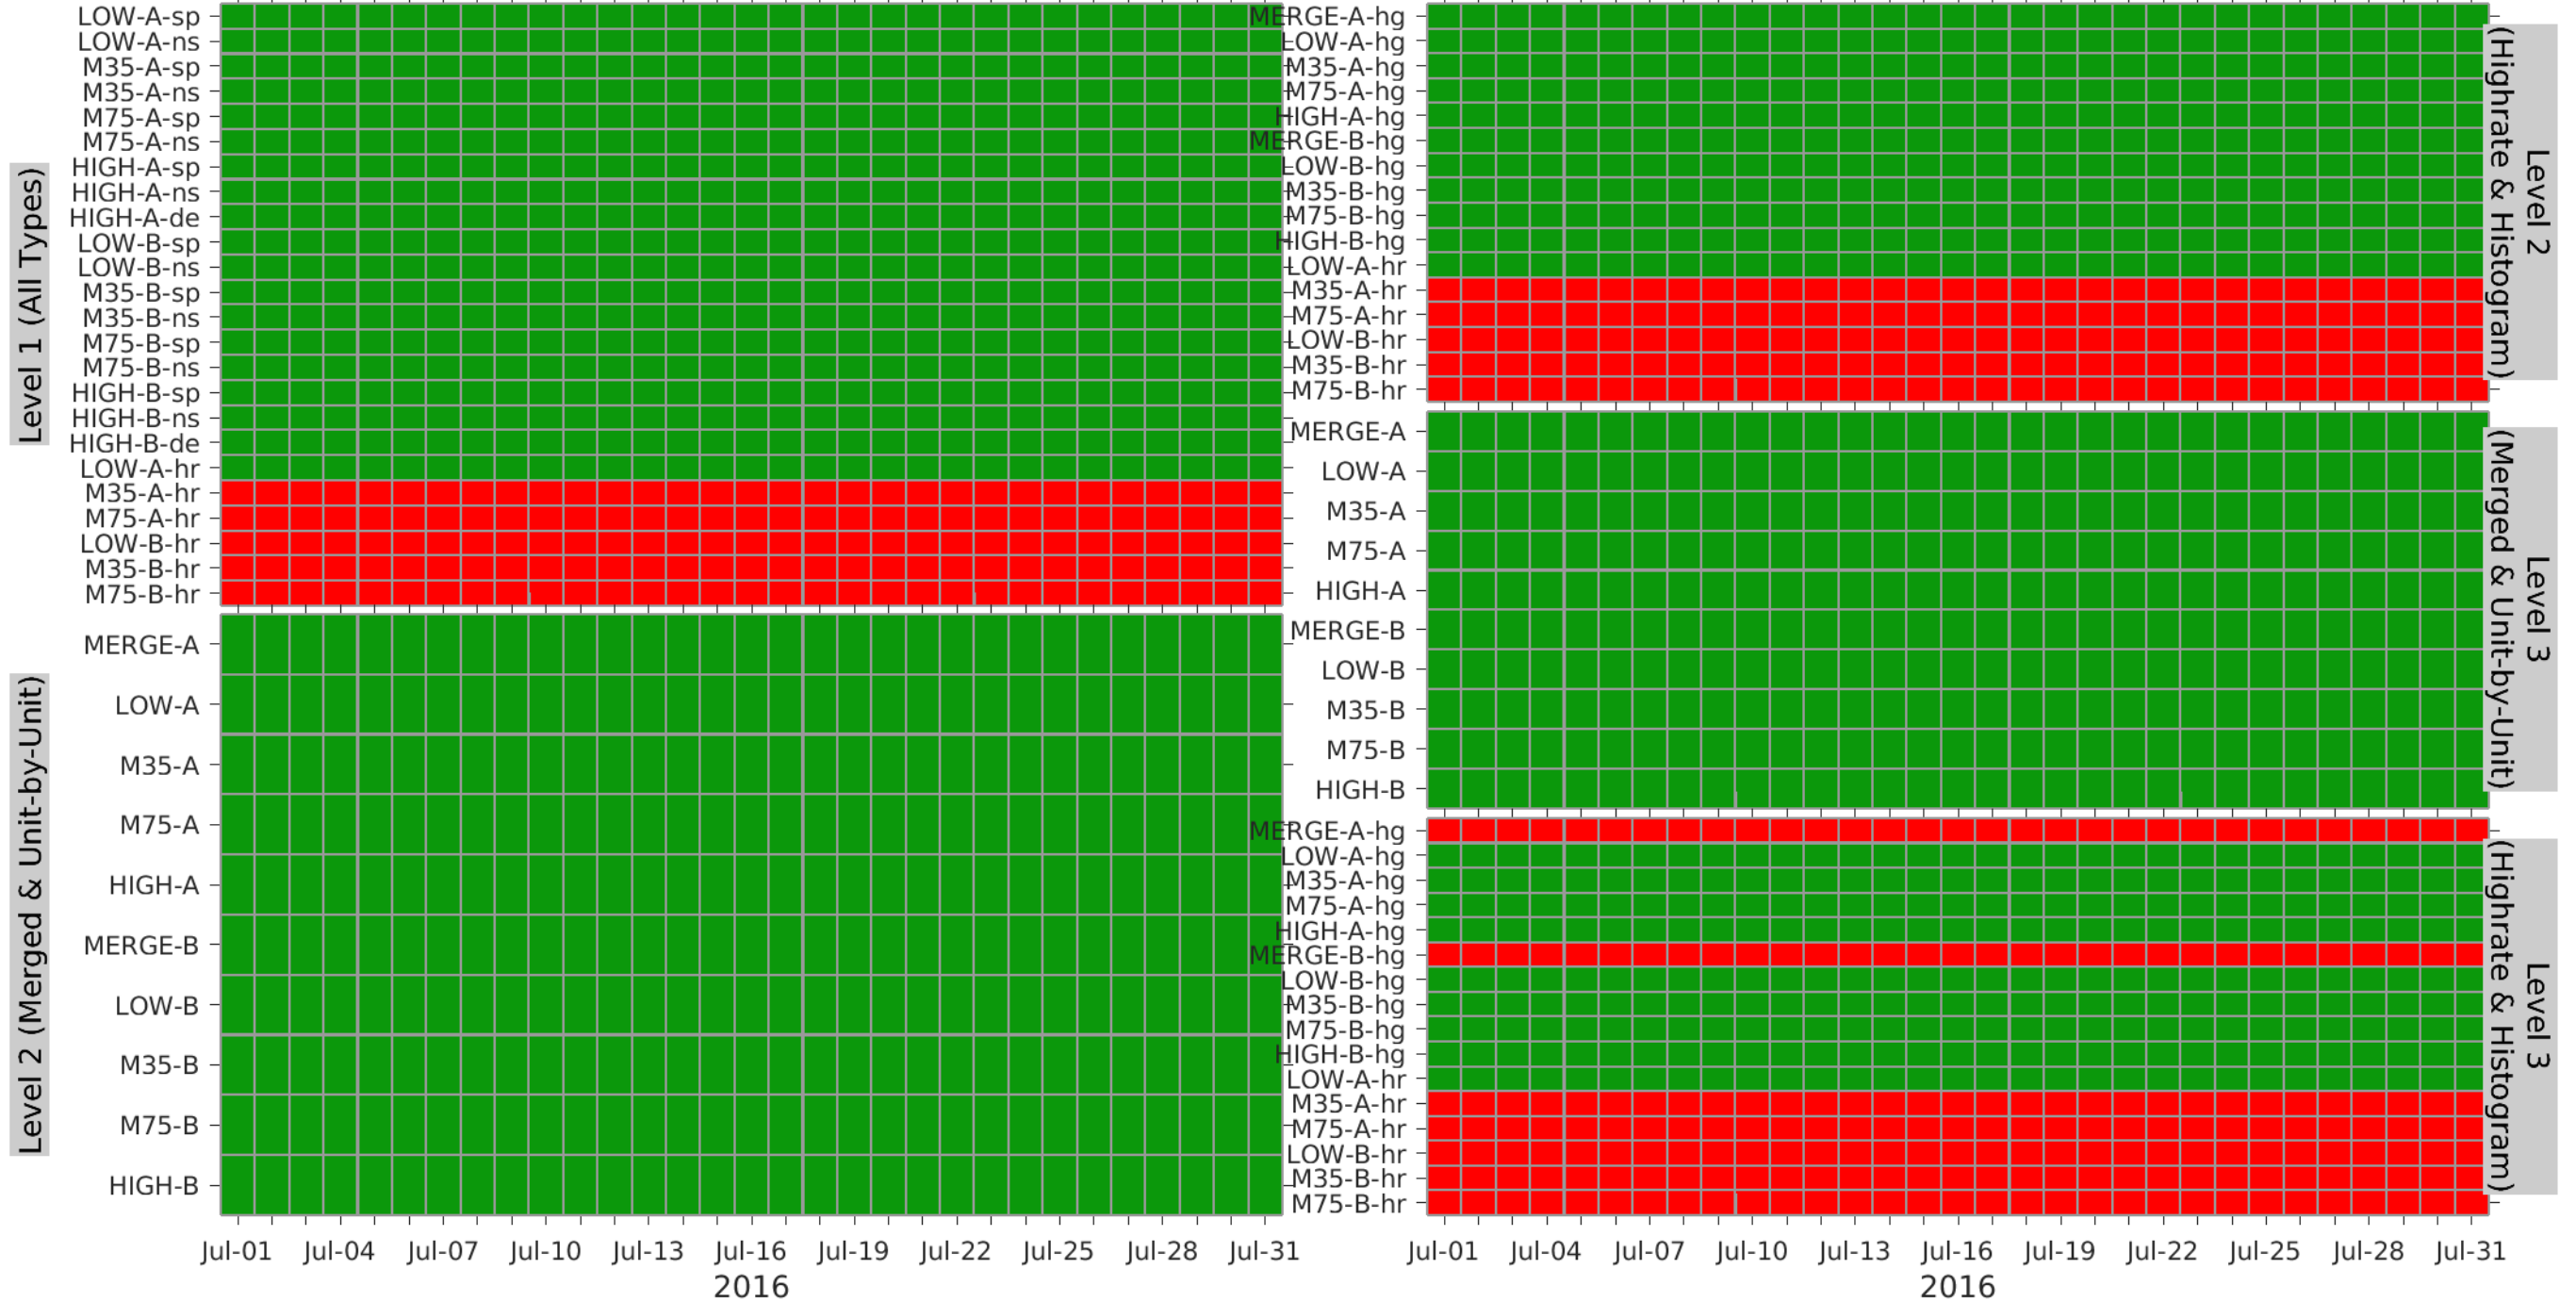



MagEIS Data Files | Created on: 2021/10/21 | Green = File Exists | Red = File Does Not Exist

sp=spin-based (science) | ns=non-science (housekeeping & status) | hr=highrate (LOW/MED only) | hg=histogram | de=direct event (HIGH only)

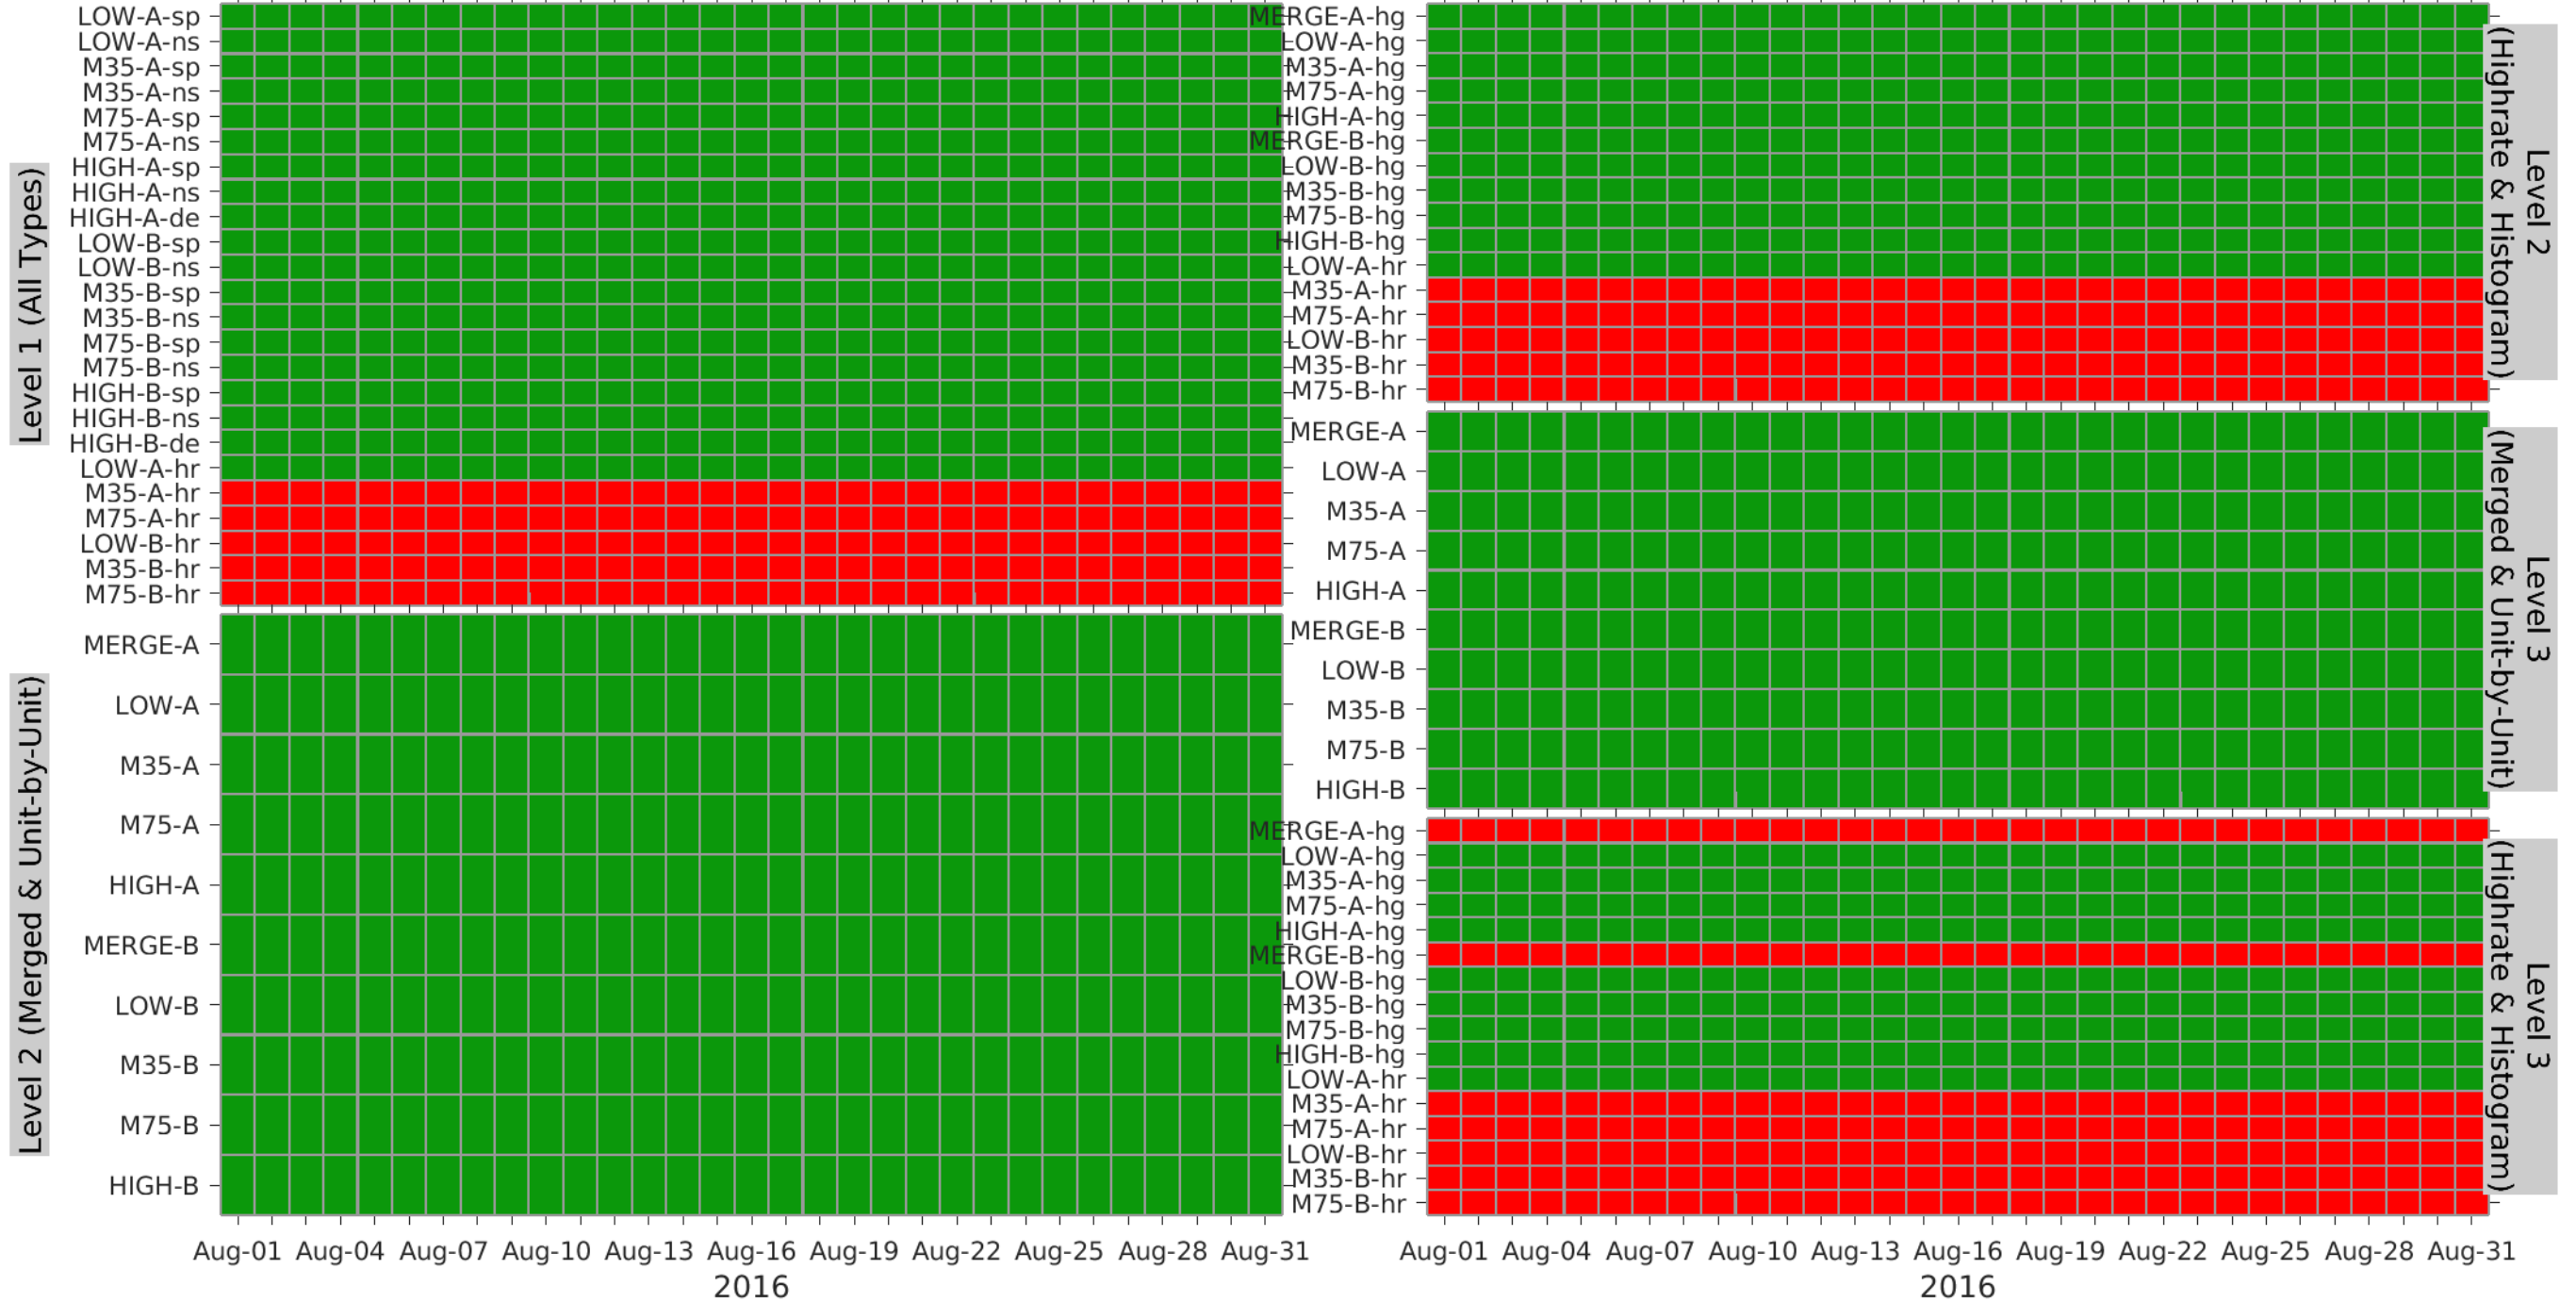

MagEIS Data Files | Created on: 2021/10/21 | Green = File Exists | Red = File Does Not Exist

sp=spin-based (science) | ns=non-science (housekeeping & status) | hr=highrate (LOW/MED only) | hg=histogram | de=direct event (HIGH only)

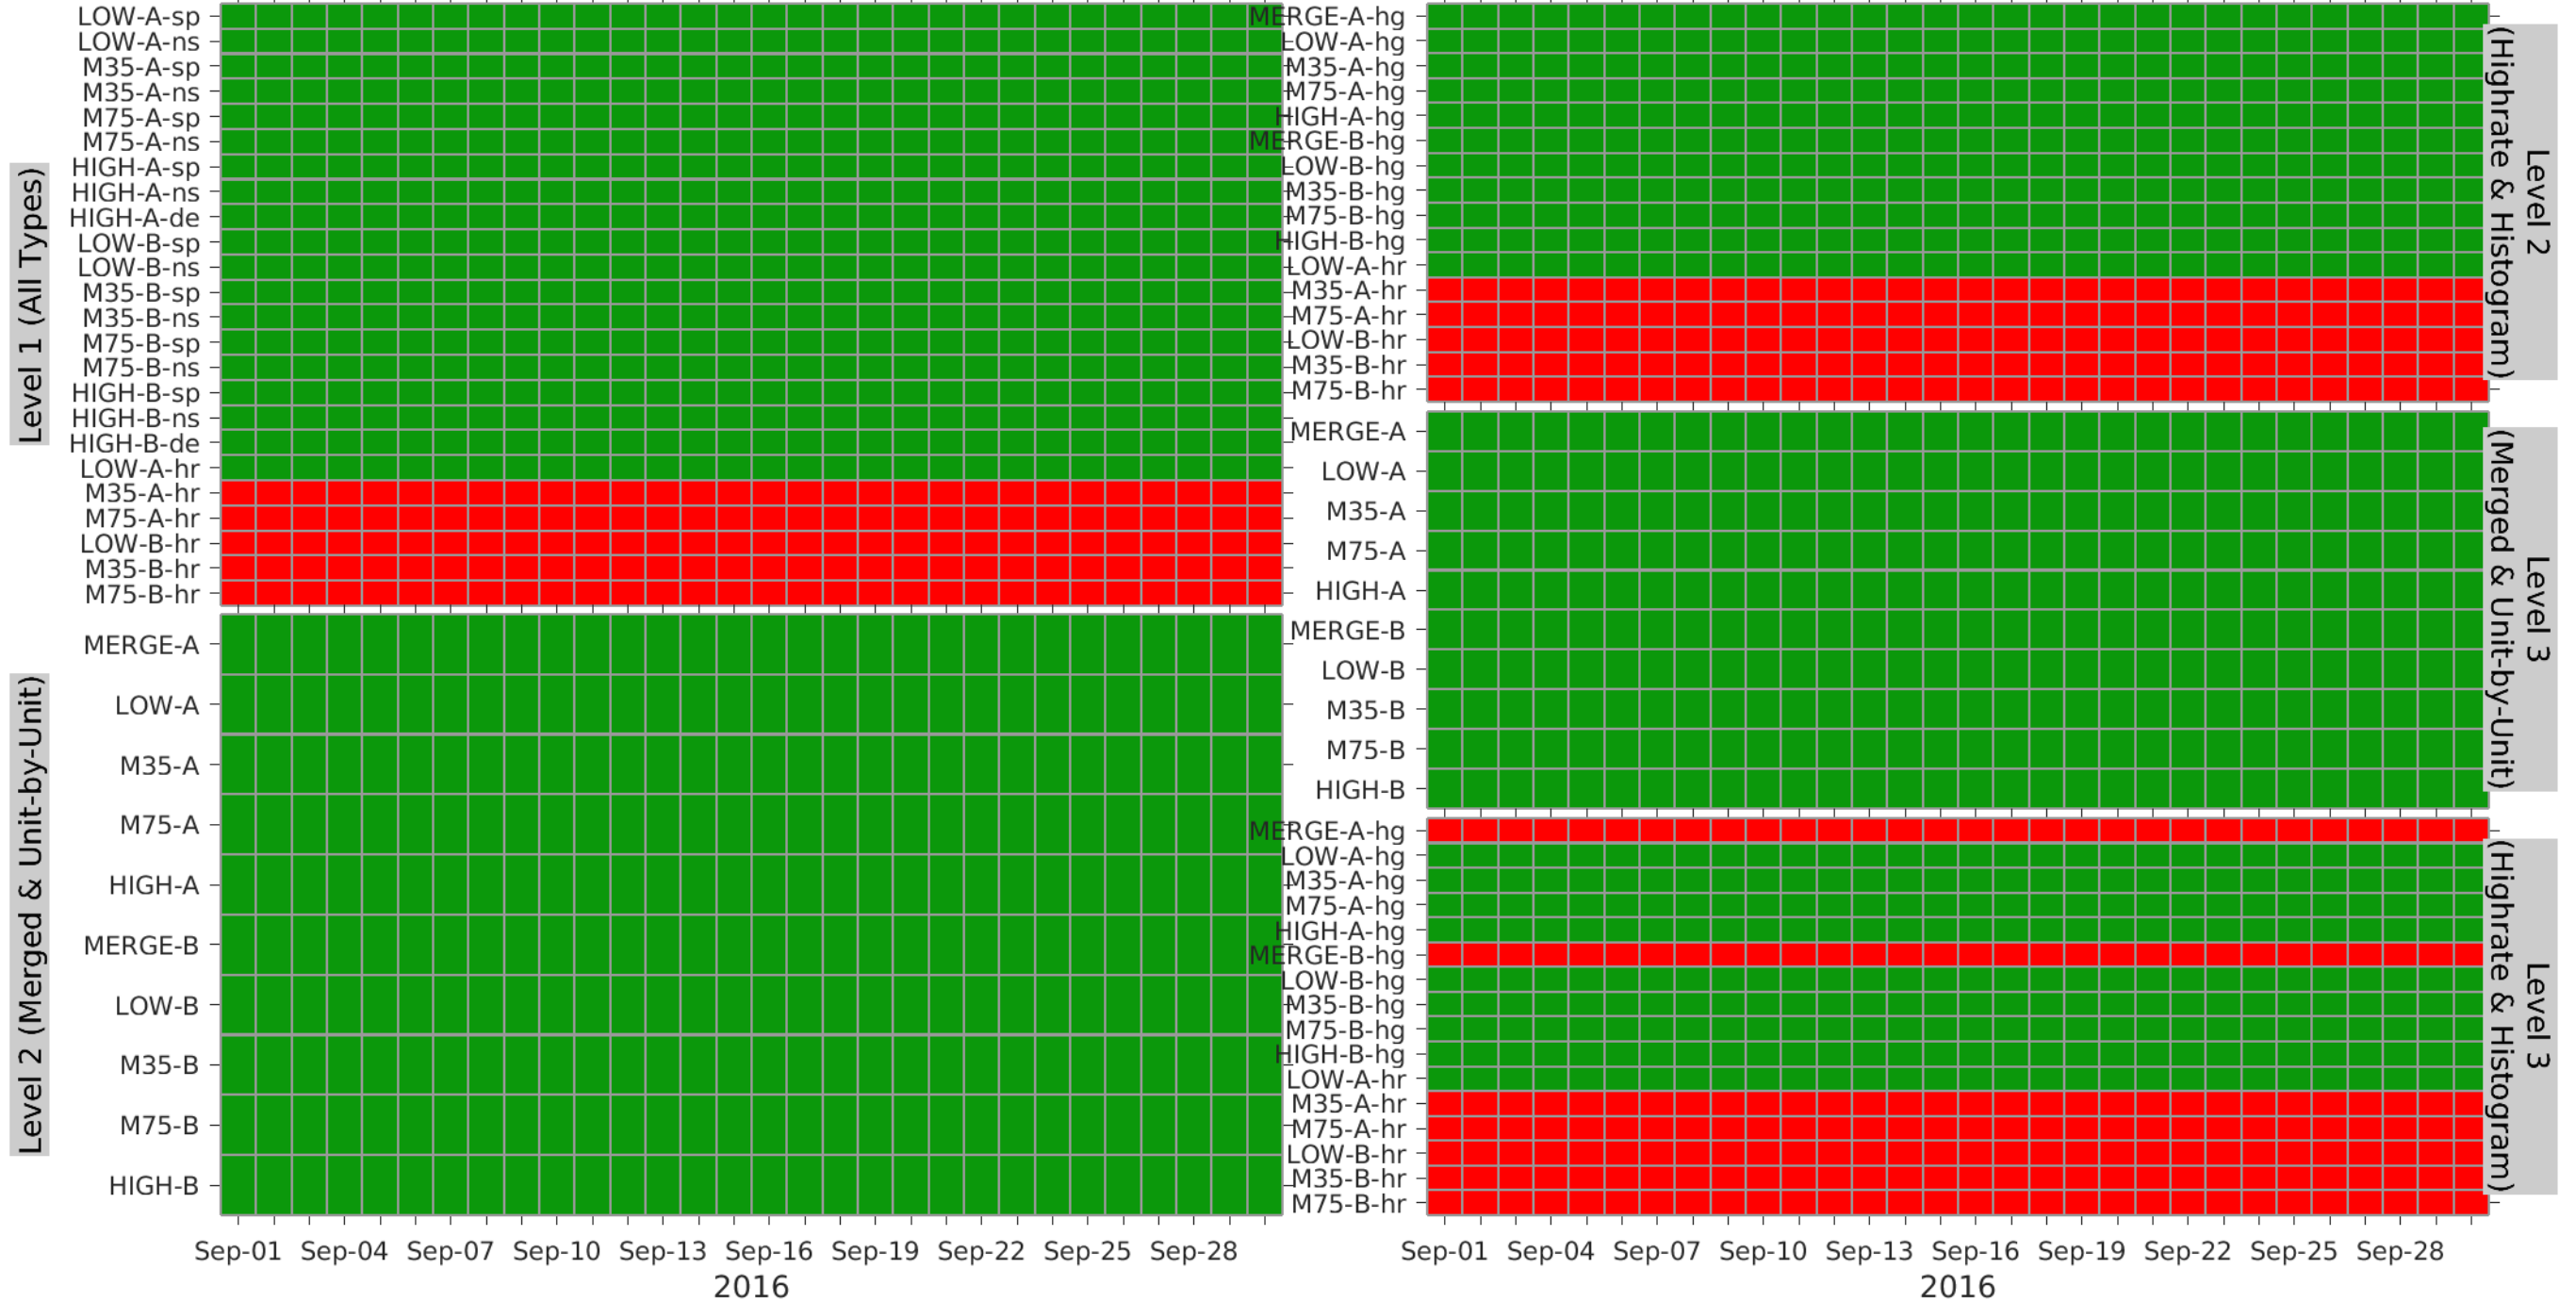

MagEIS Data Files | Created on: 2021/10/21 | Green = File Exists | Red = File Does Not Exist

sp=spin-based (science) | ns=non-science (housekeeping & status) | hr=highrate (LOW/MED only) | hg=histogram | de=direct event (HIGH only)

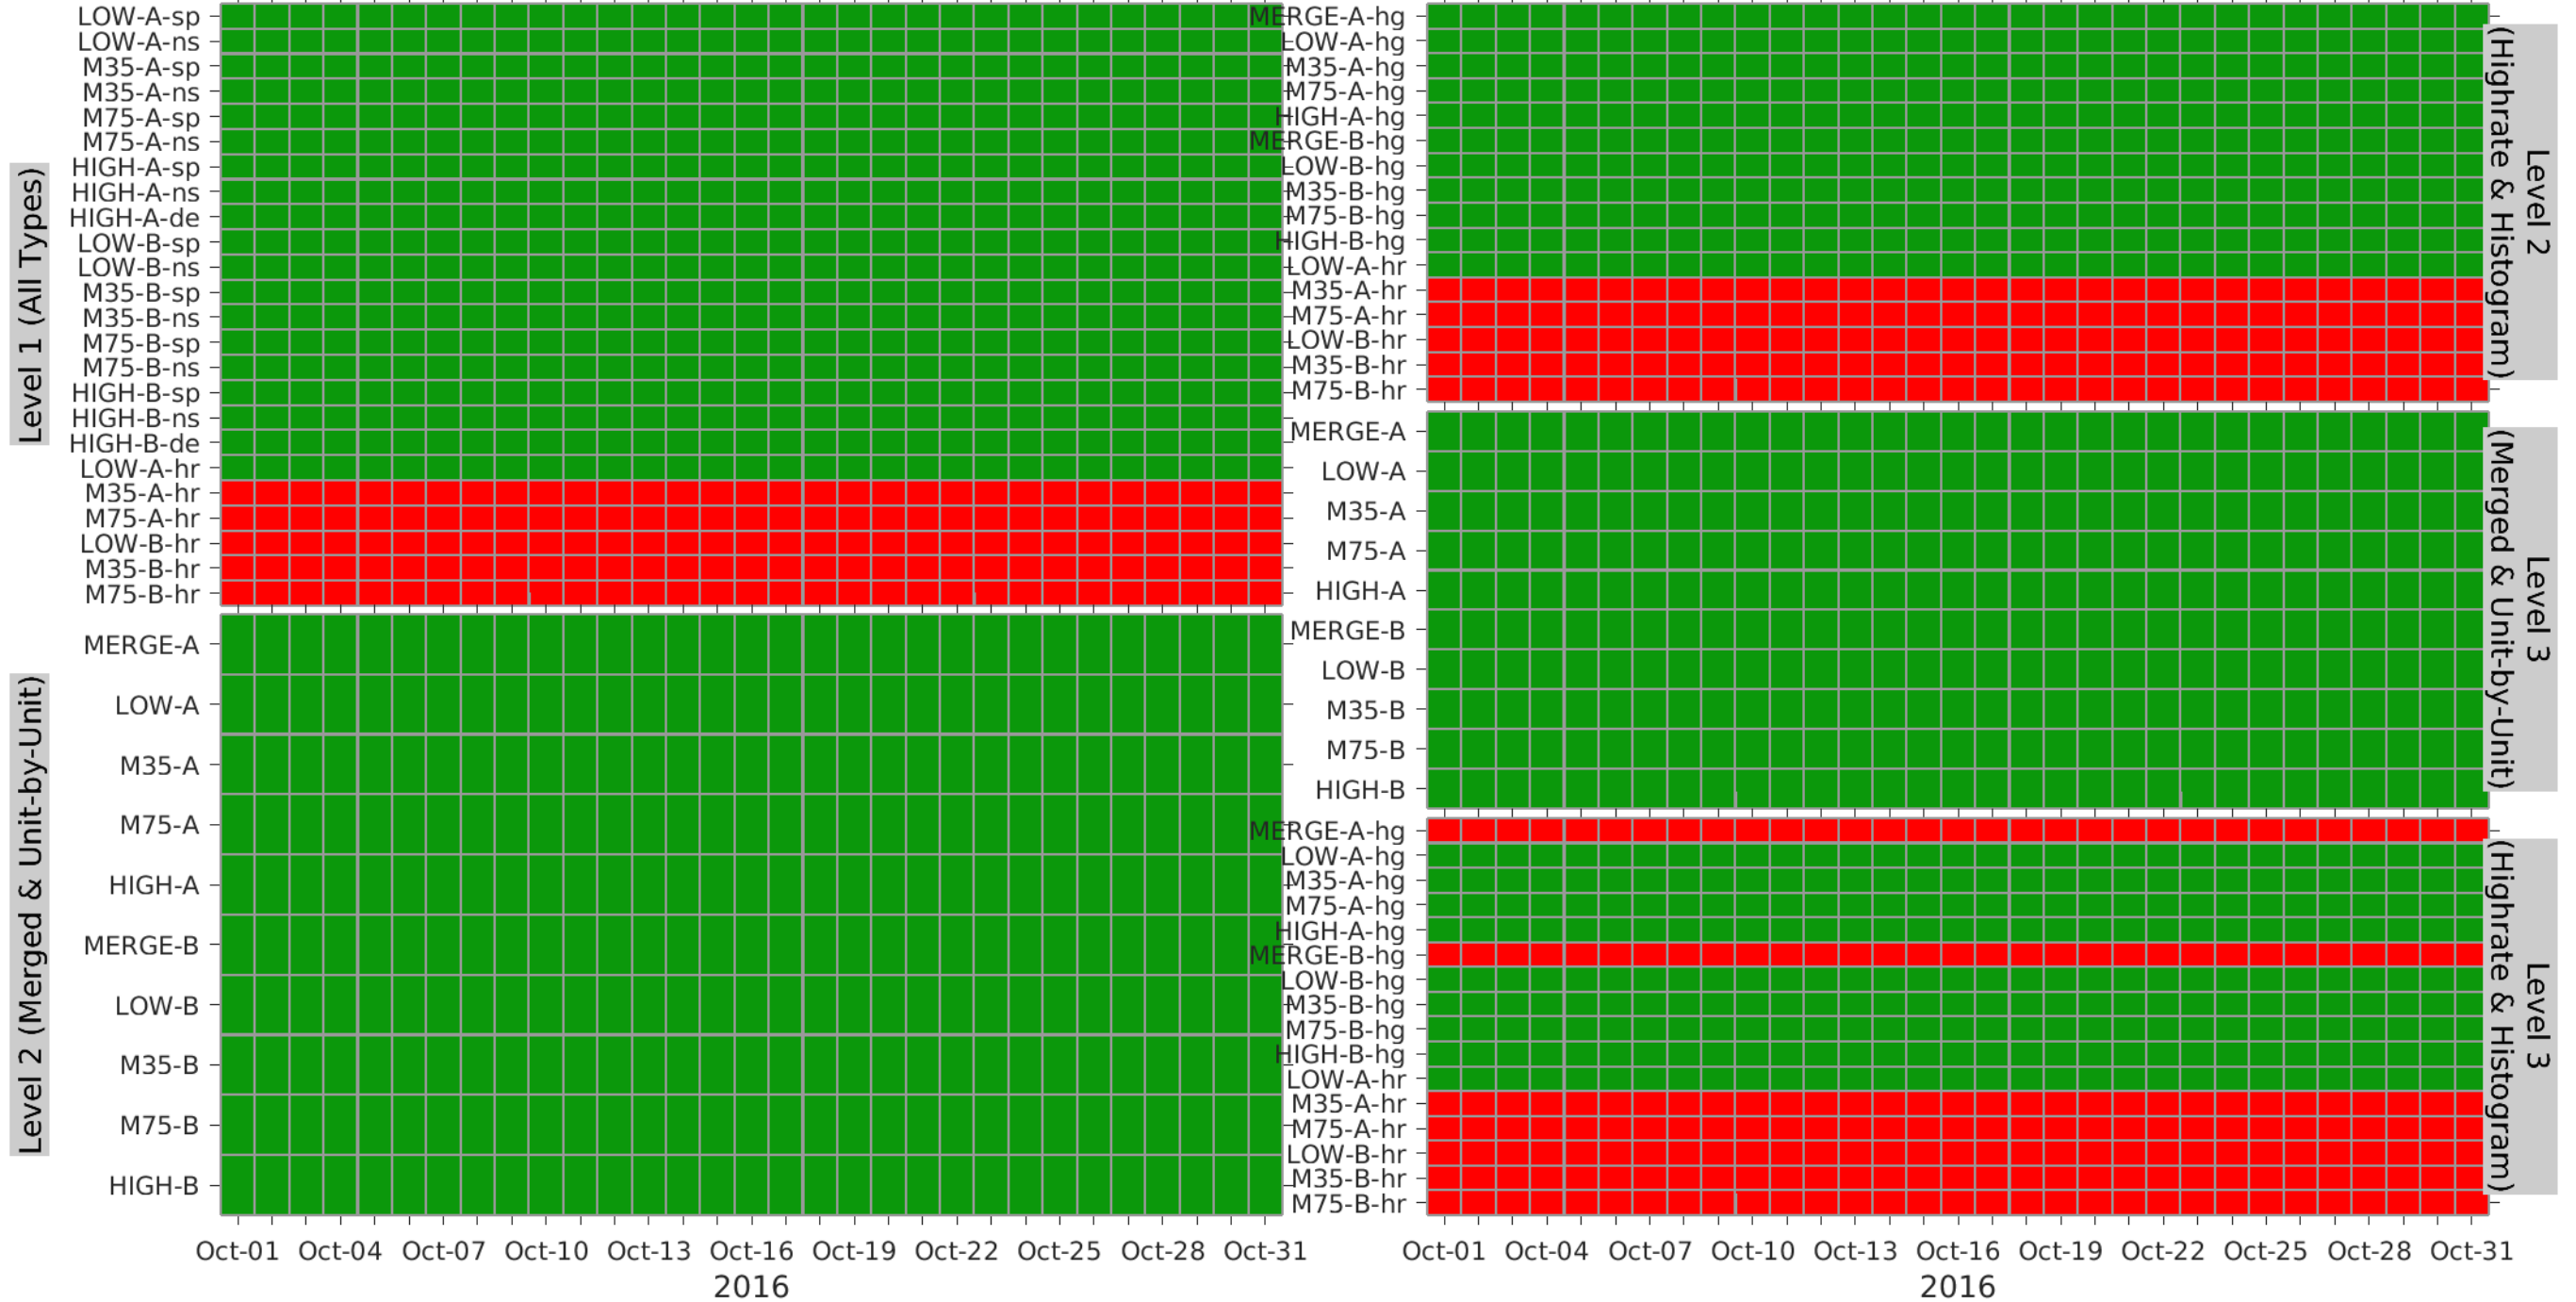

MagEIS Data Files | Created on: 2021/10/21 | Green = File Exists | Red = File Does Not Exist

sp=spin-based (science) | ns=non-science (housekeeping & status) | hr=highrate (LOW/MED only) | hg=histogram | de=direct event (HIGH only)

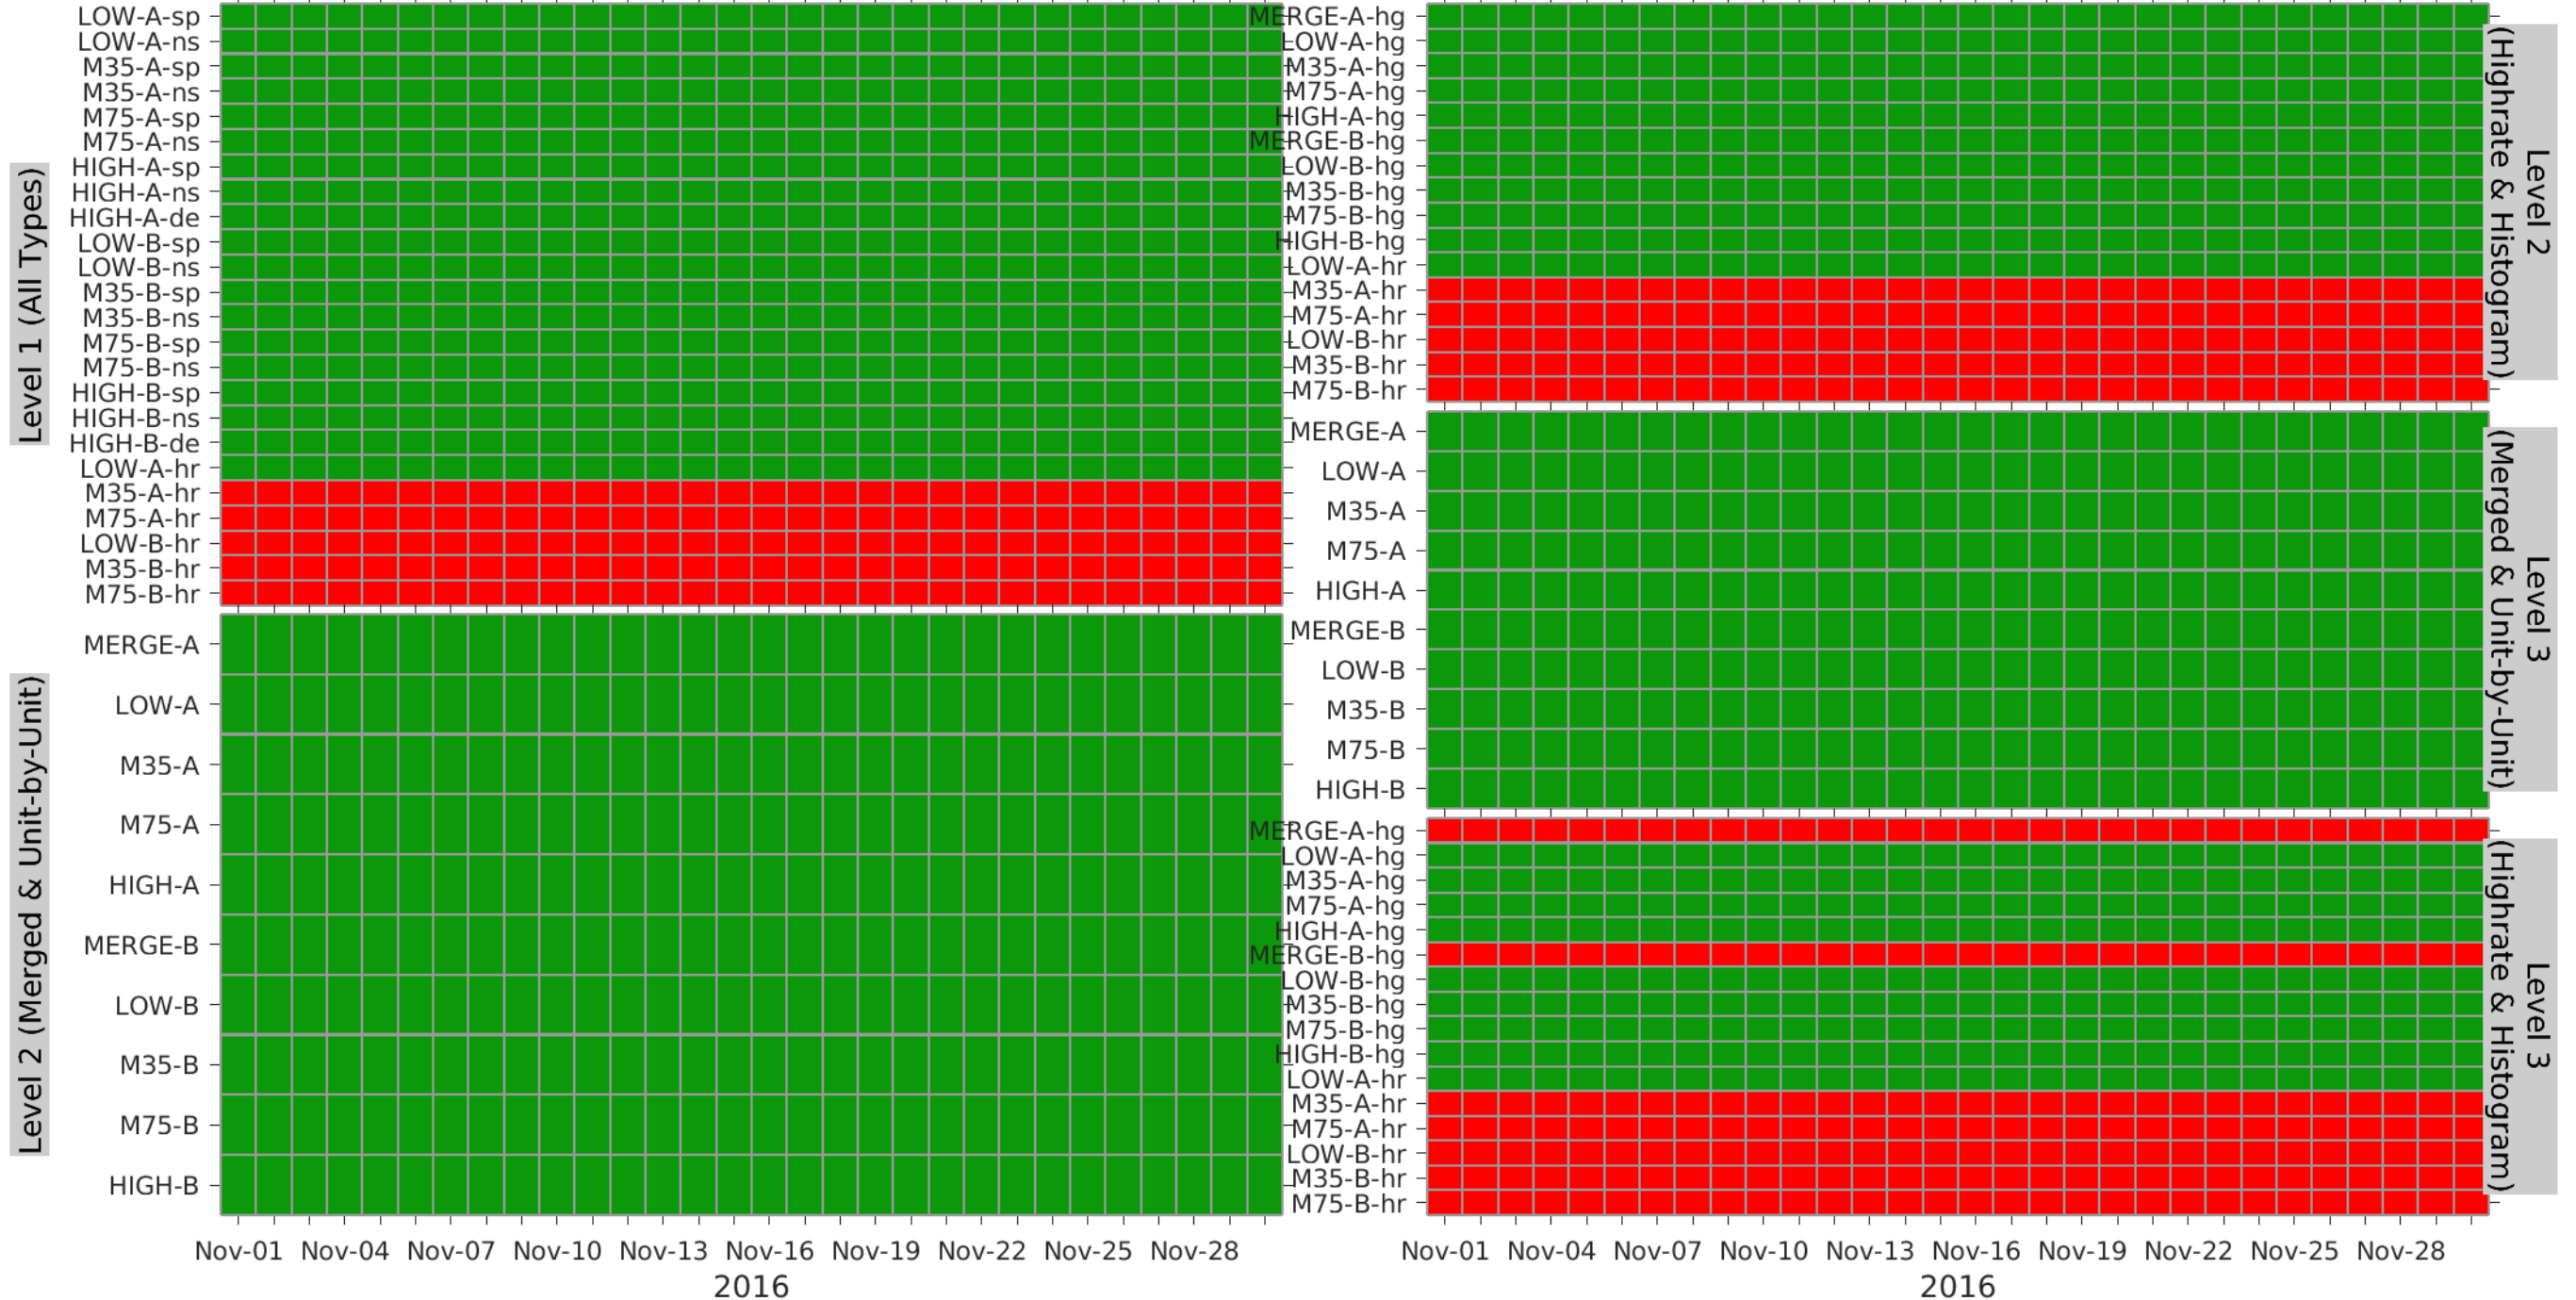



MagEIS Data Files | Created on: 2021/10/21 | Green = File Exists | Red = File Does Not Exist

sp=spin-based (science) | ns=non-science (housekeeping & status) | hr=highrate (LOW/MED only) | hg=histogram | de=direct event (HIGH only)

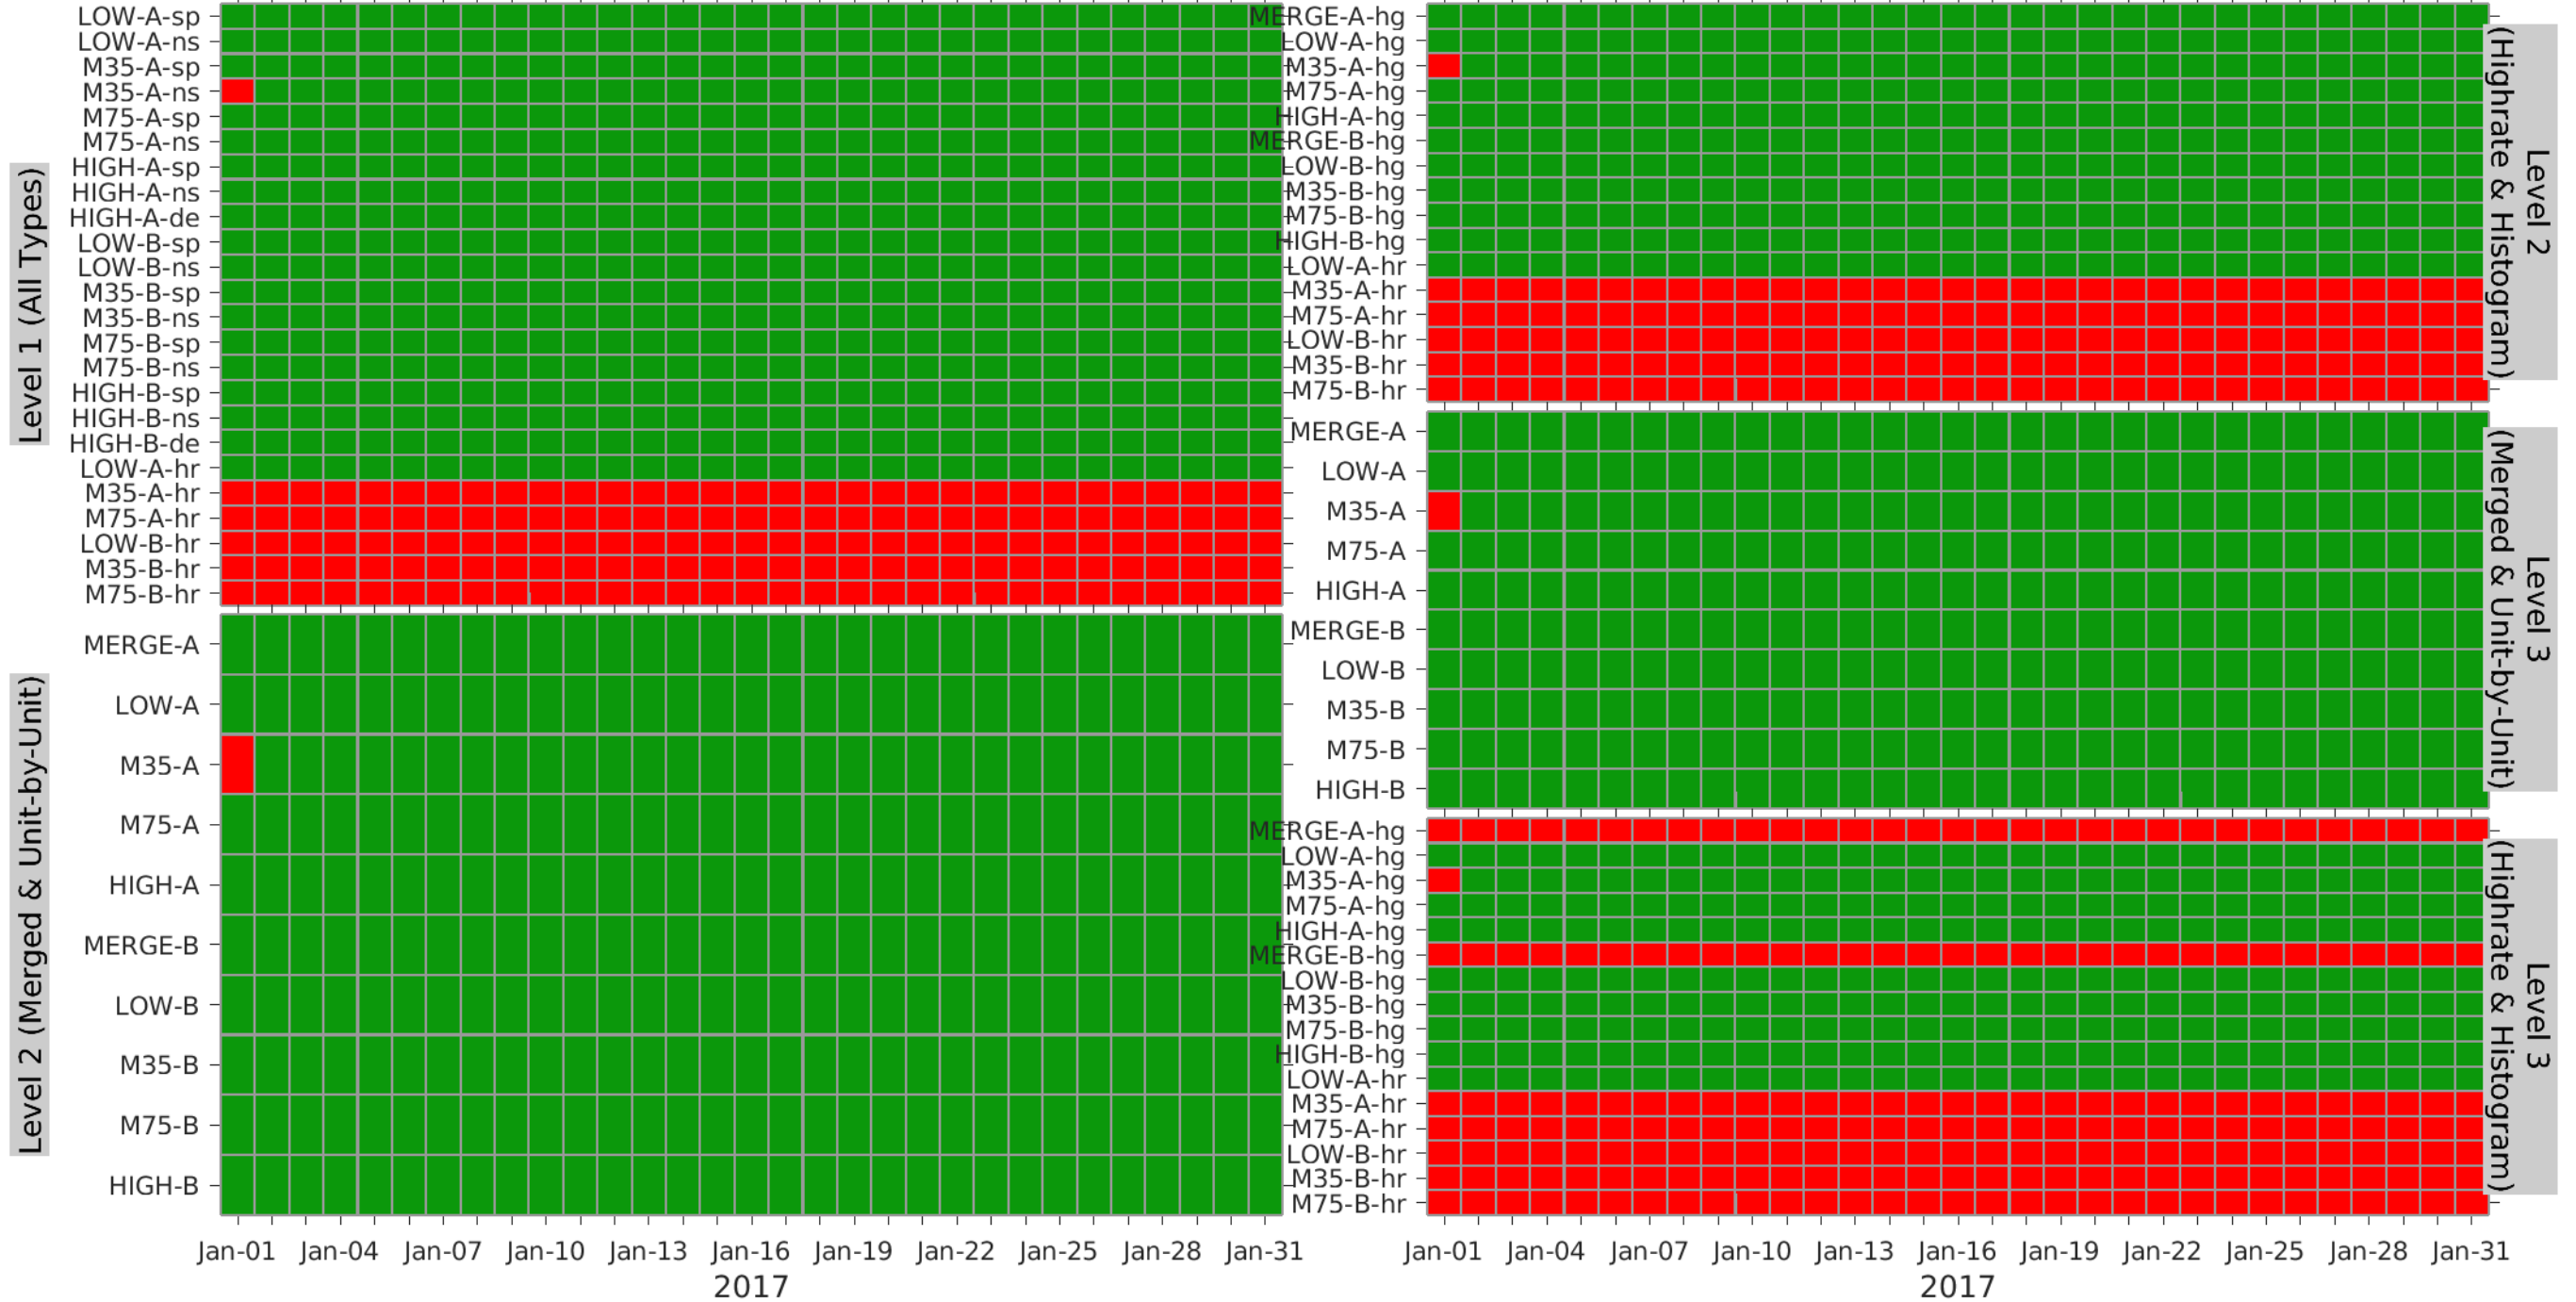

MagEIS Data Files | Created on: 2021/10/21 | Green = File Exists | Red = File Does Not Exist

sp=spin-based (science) | ns=non-science (housekeeping & status) | hr=highrate (LOW/MED only) | hg=histogram | de=direct event (HIGH only)

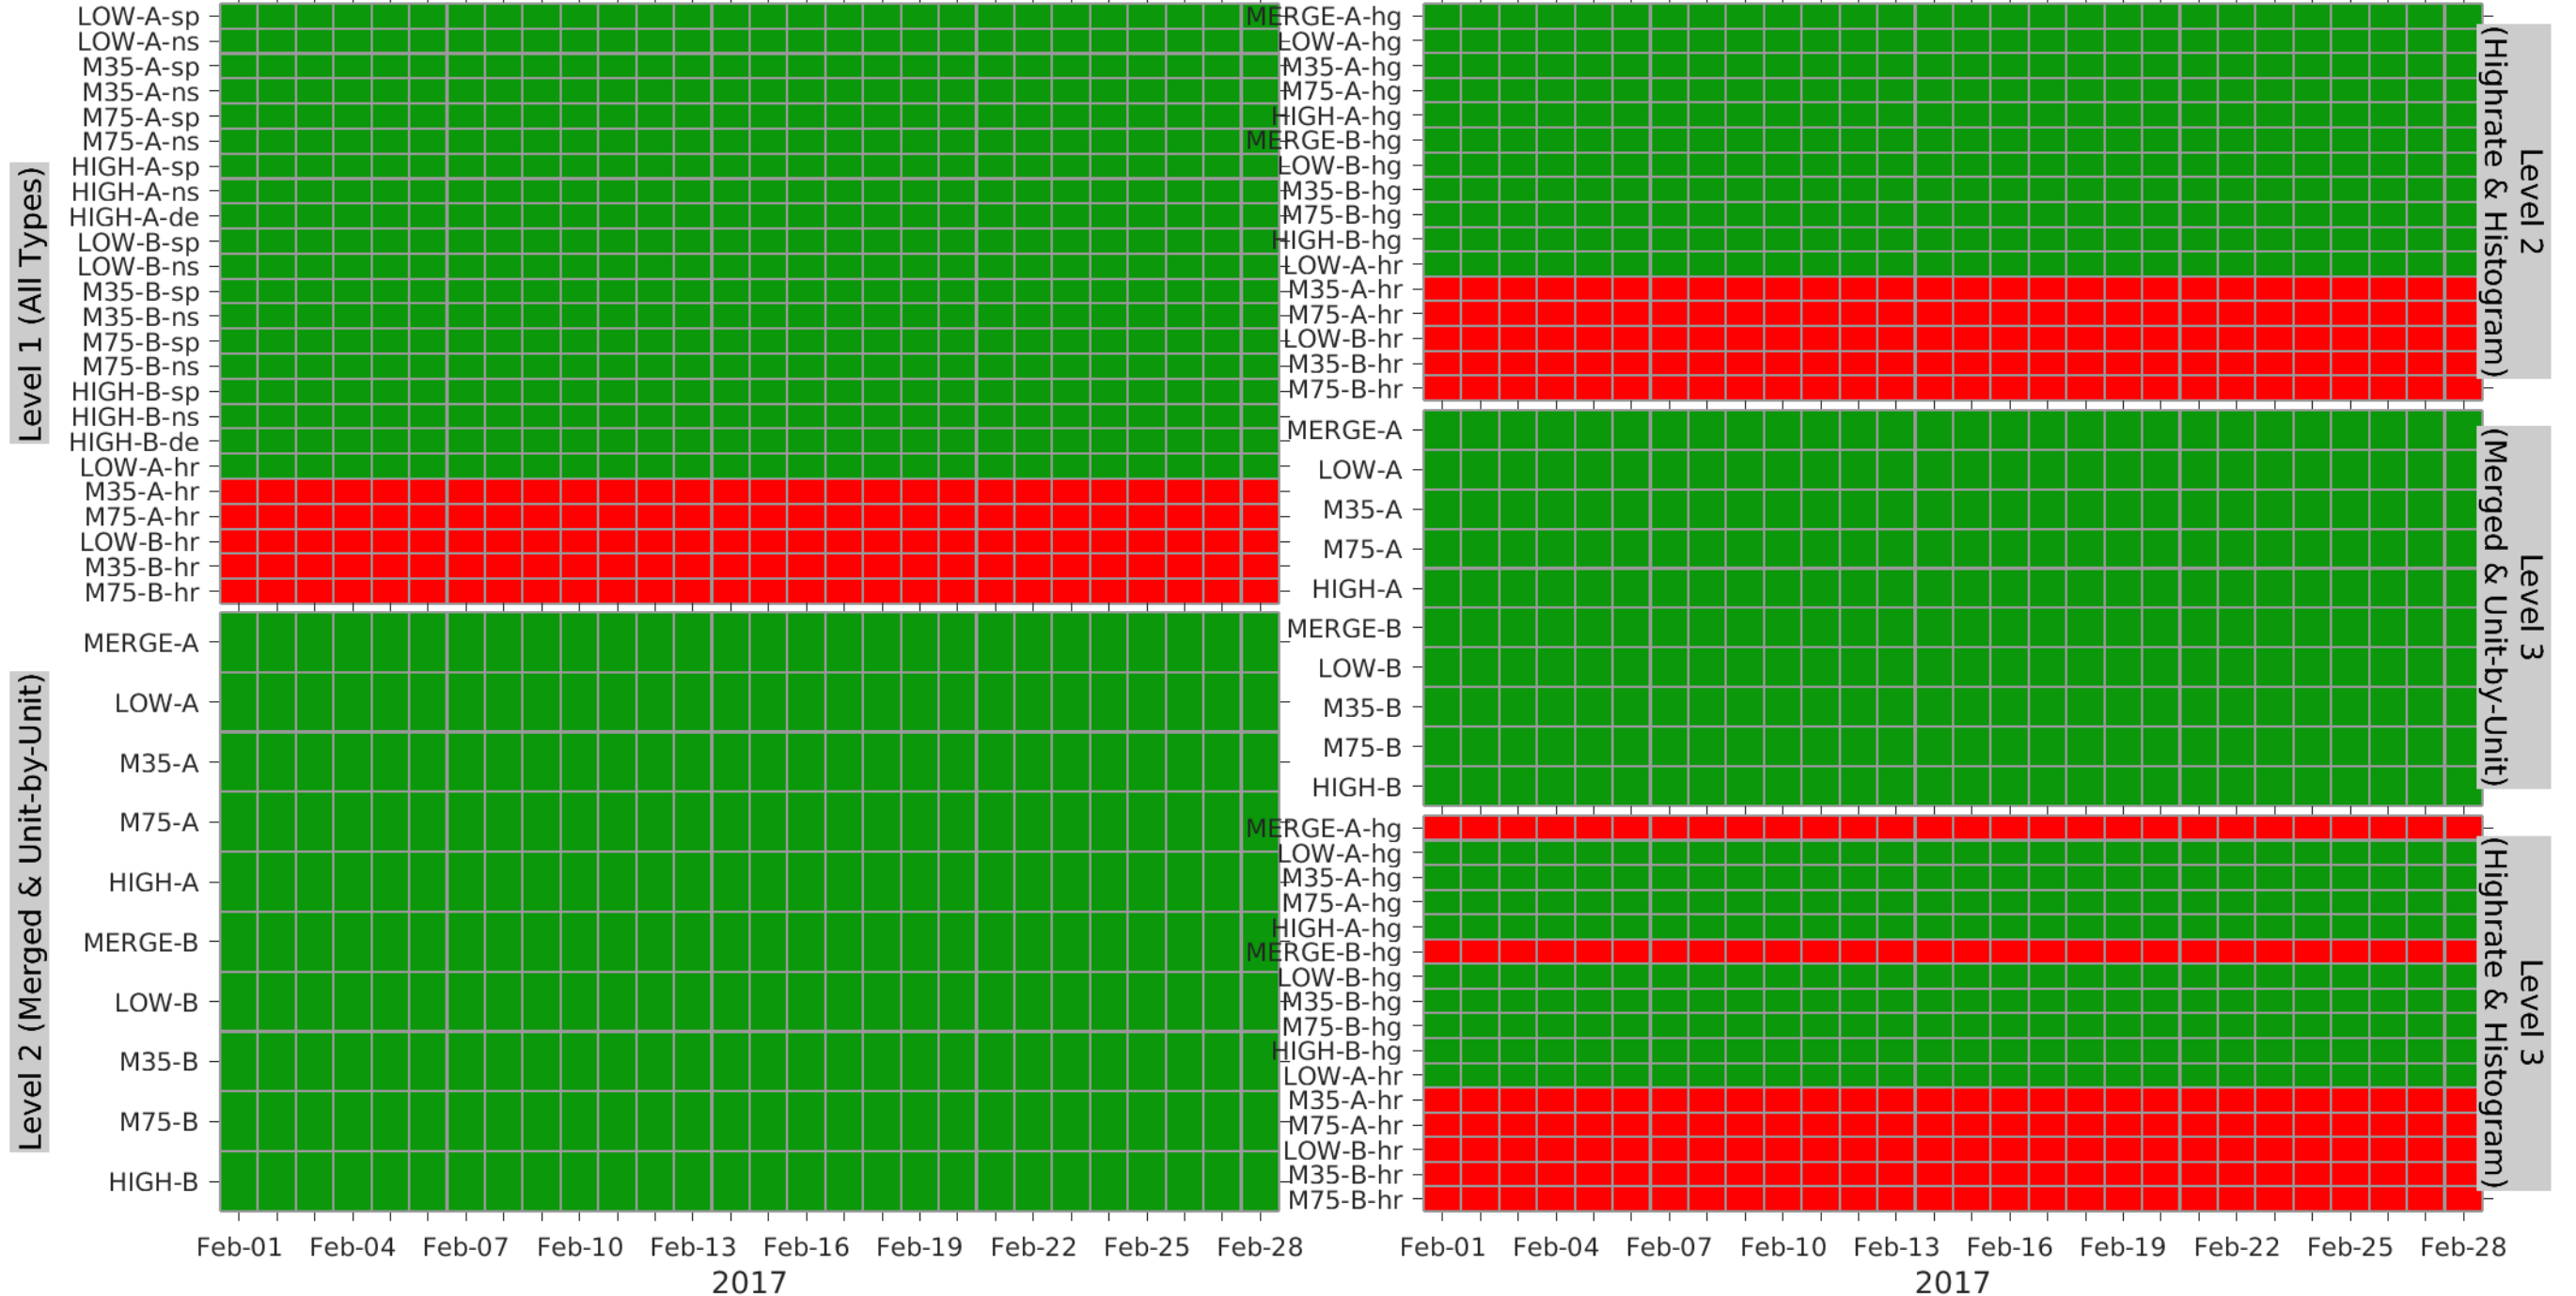

MagEIS Data Files | Created on: 2021/10/21 | Green = File Exists | Red = File Does Not Exist

sp=spin-based (science) | ns=non-science (housekeeping & status) | hr=highrate (LOW/MED only) | hg=histogram | de=direct event (HIGH only)

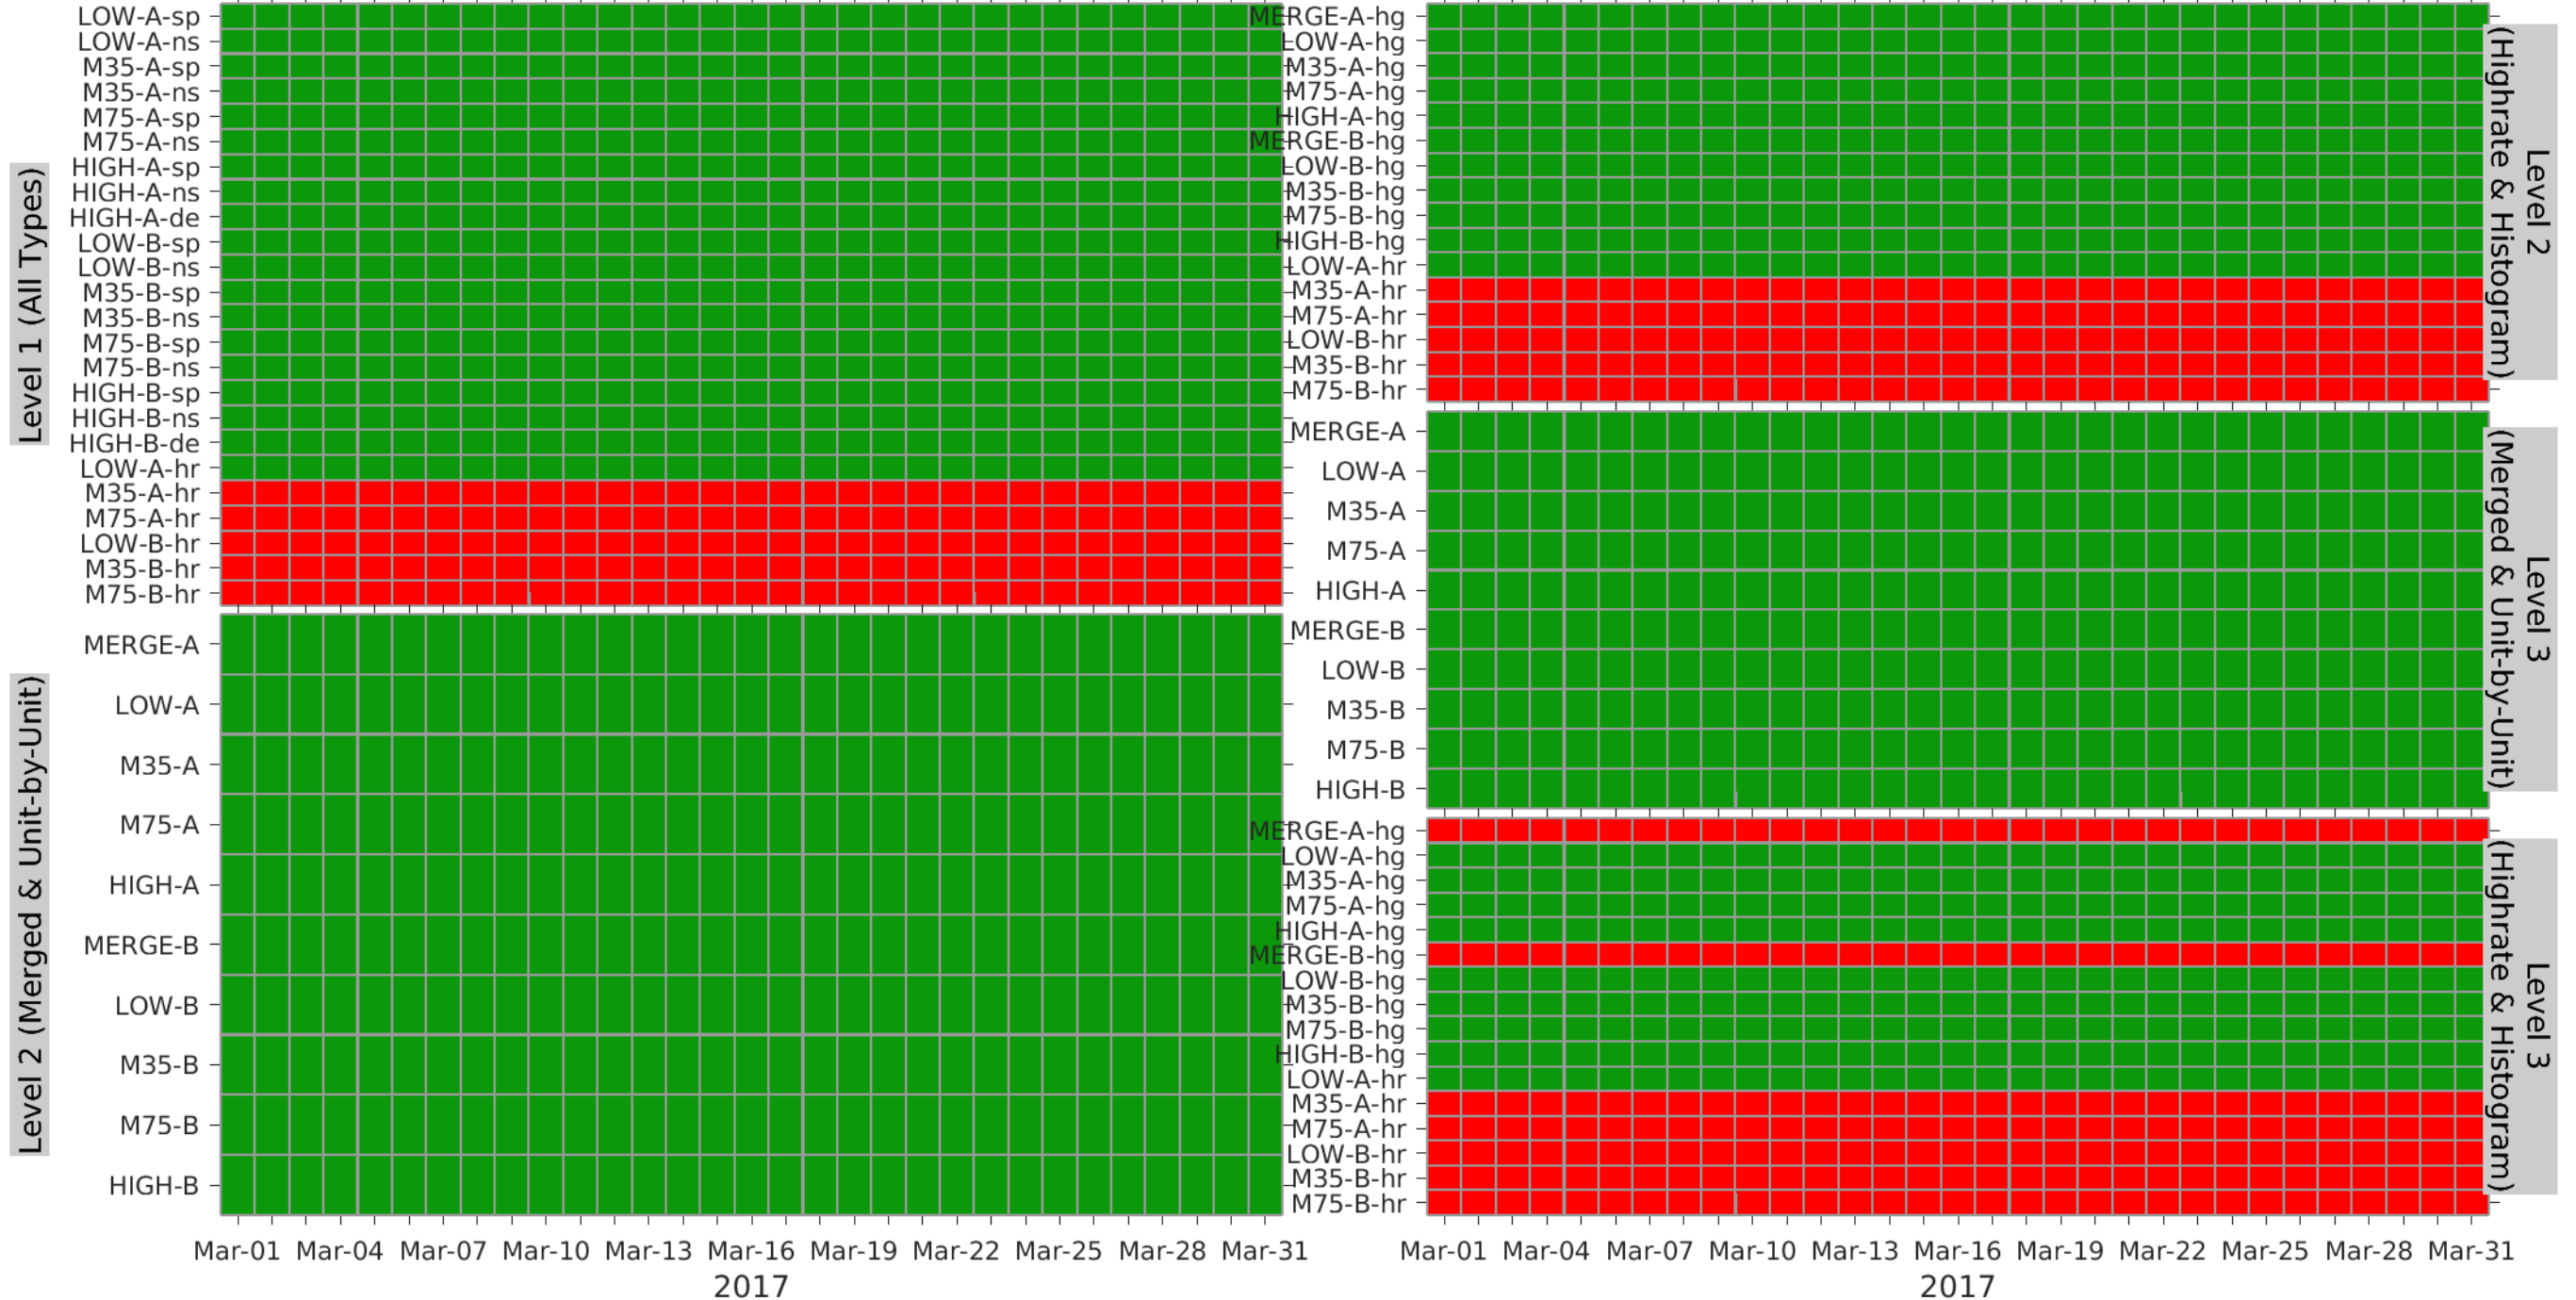



MagEIS Data Files | Created on: 2021/10/21 | Green = File Exists | Red = File Does Not Exist

sp=spin-based (science) | ns=non-science (housekeeping & status) | hr=highrate (LOW/MED only) | hg=histogram | de=direct event (HIGH only)

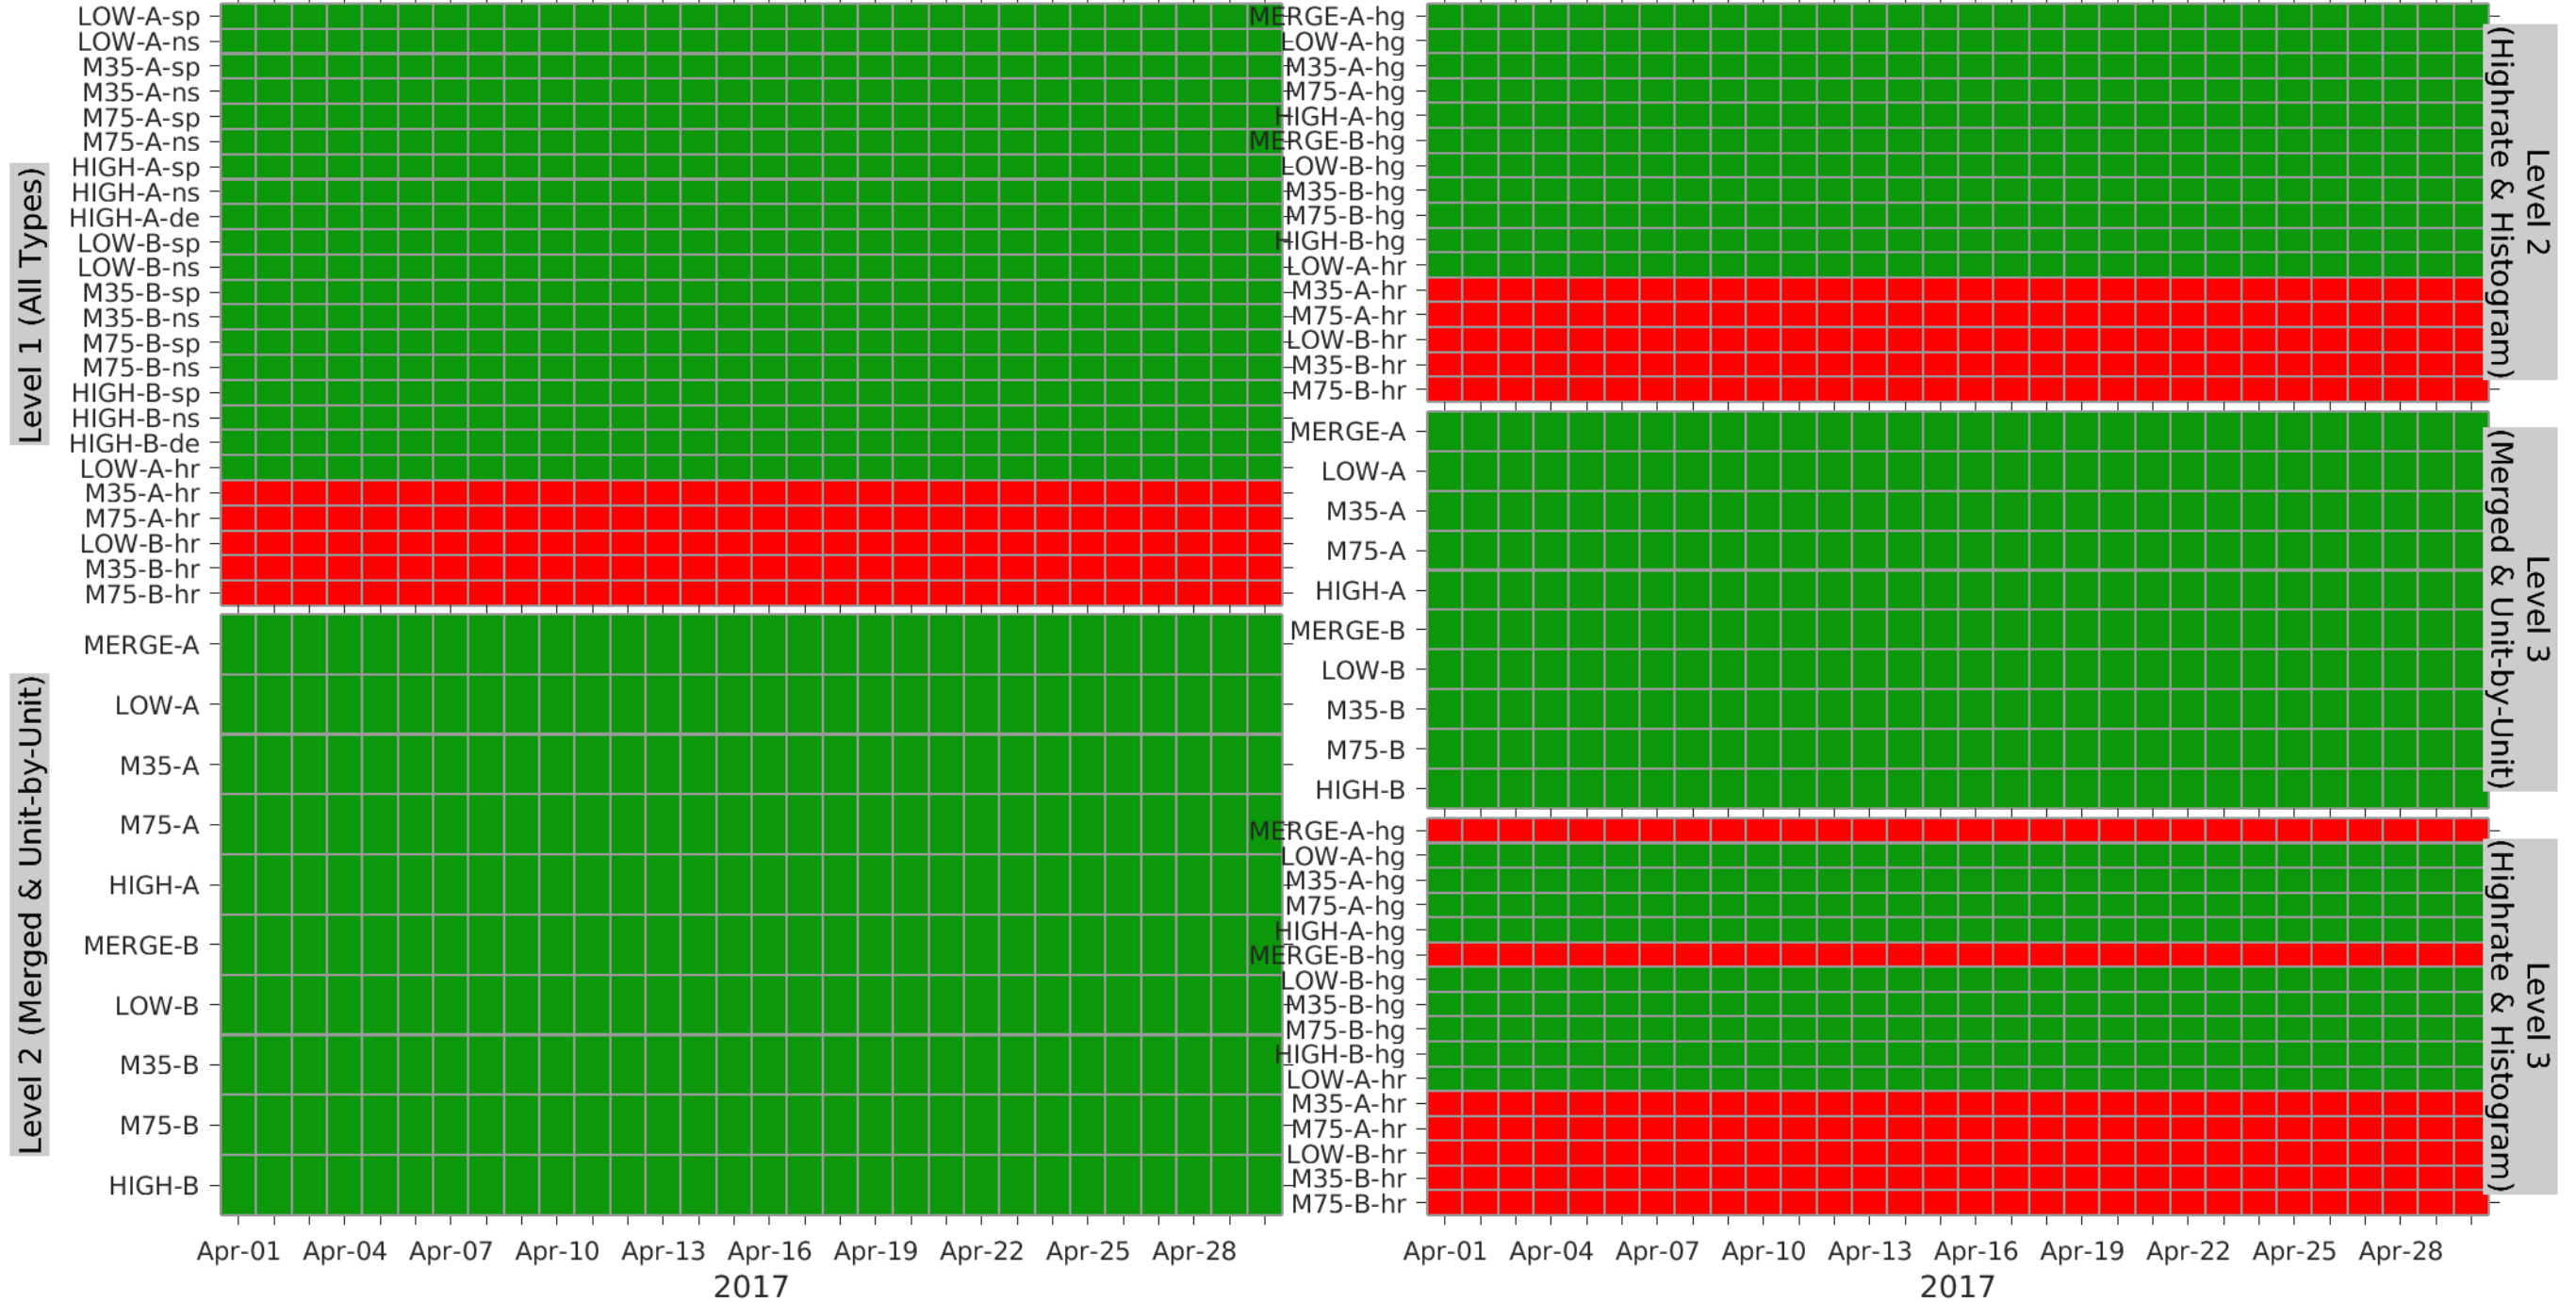

MagEIS Data Files | Created on: 2021/10/21 | Green = File Exists | Red = File Does Not Exist

sp=spin-based (science) | ns=non-science (housekeeping & status) | hr=highrate (LOW/MED only) | hg=histogram | de=direct event (HIGH only)

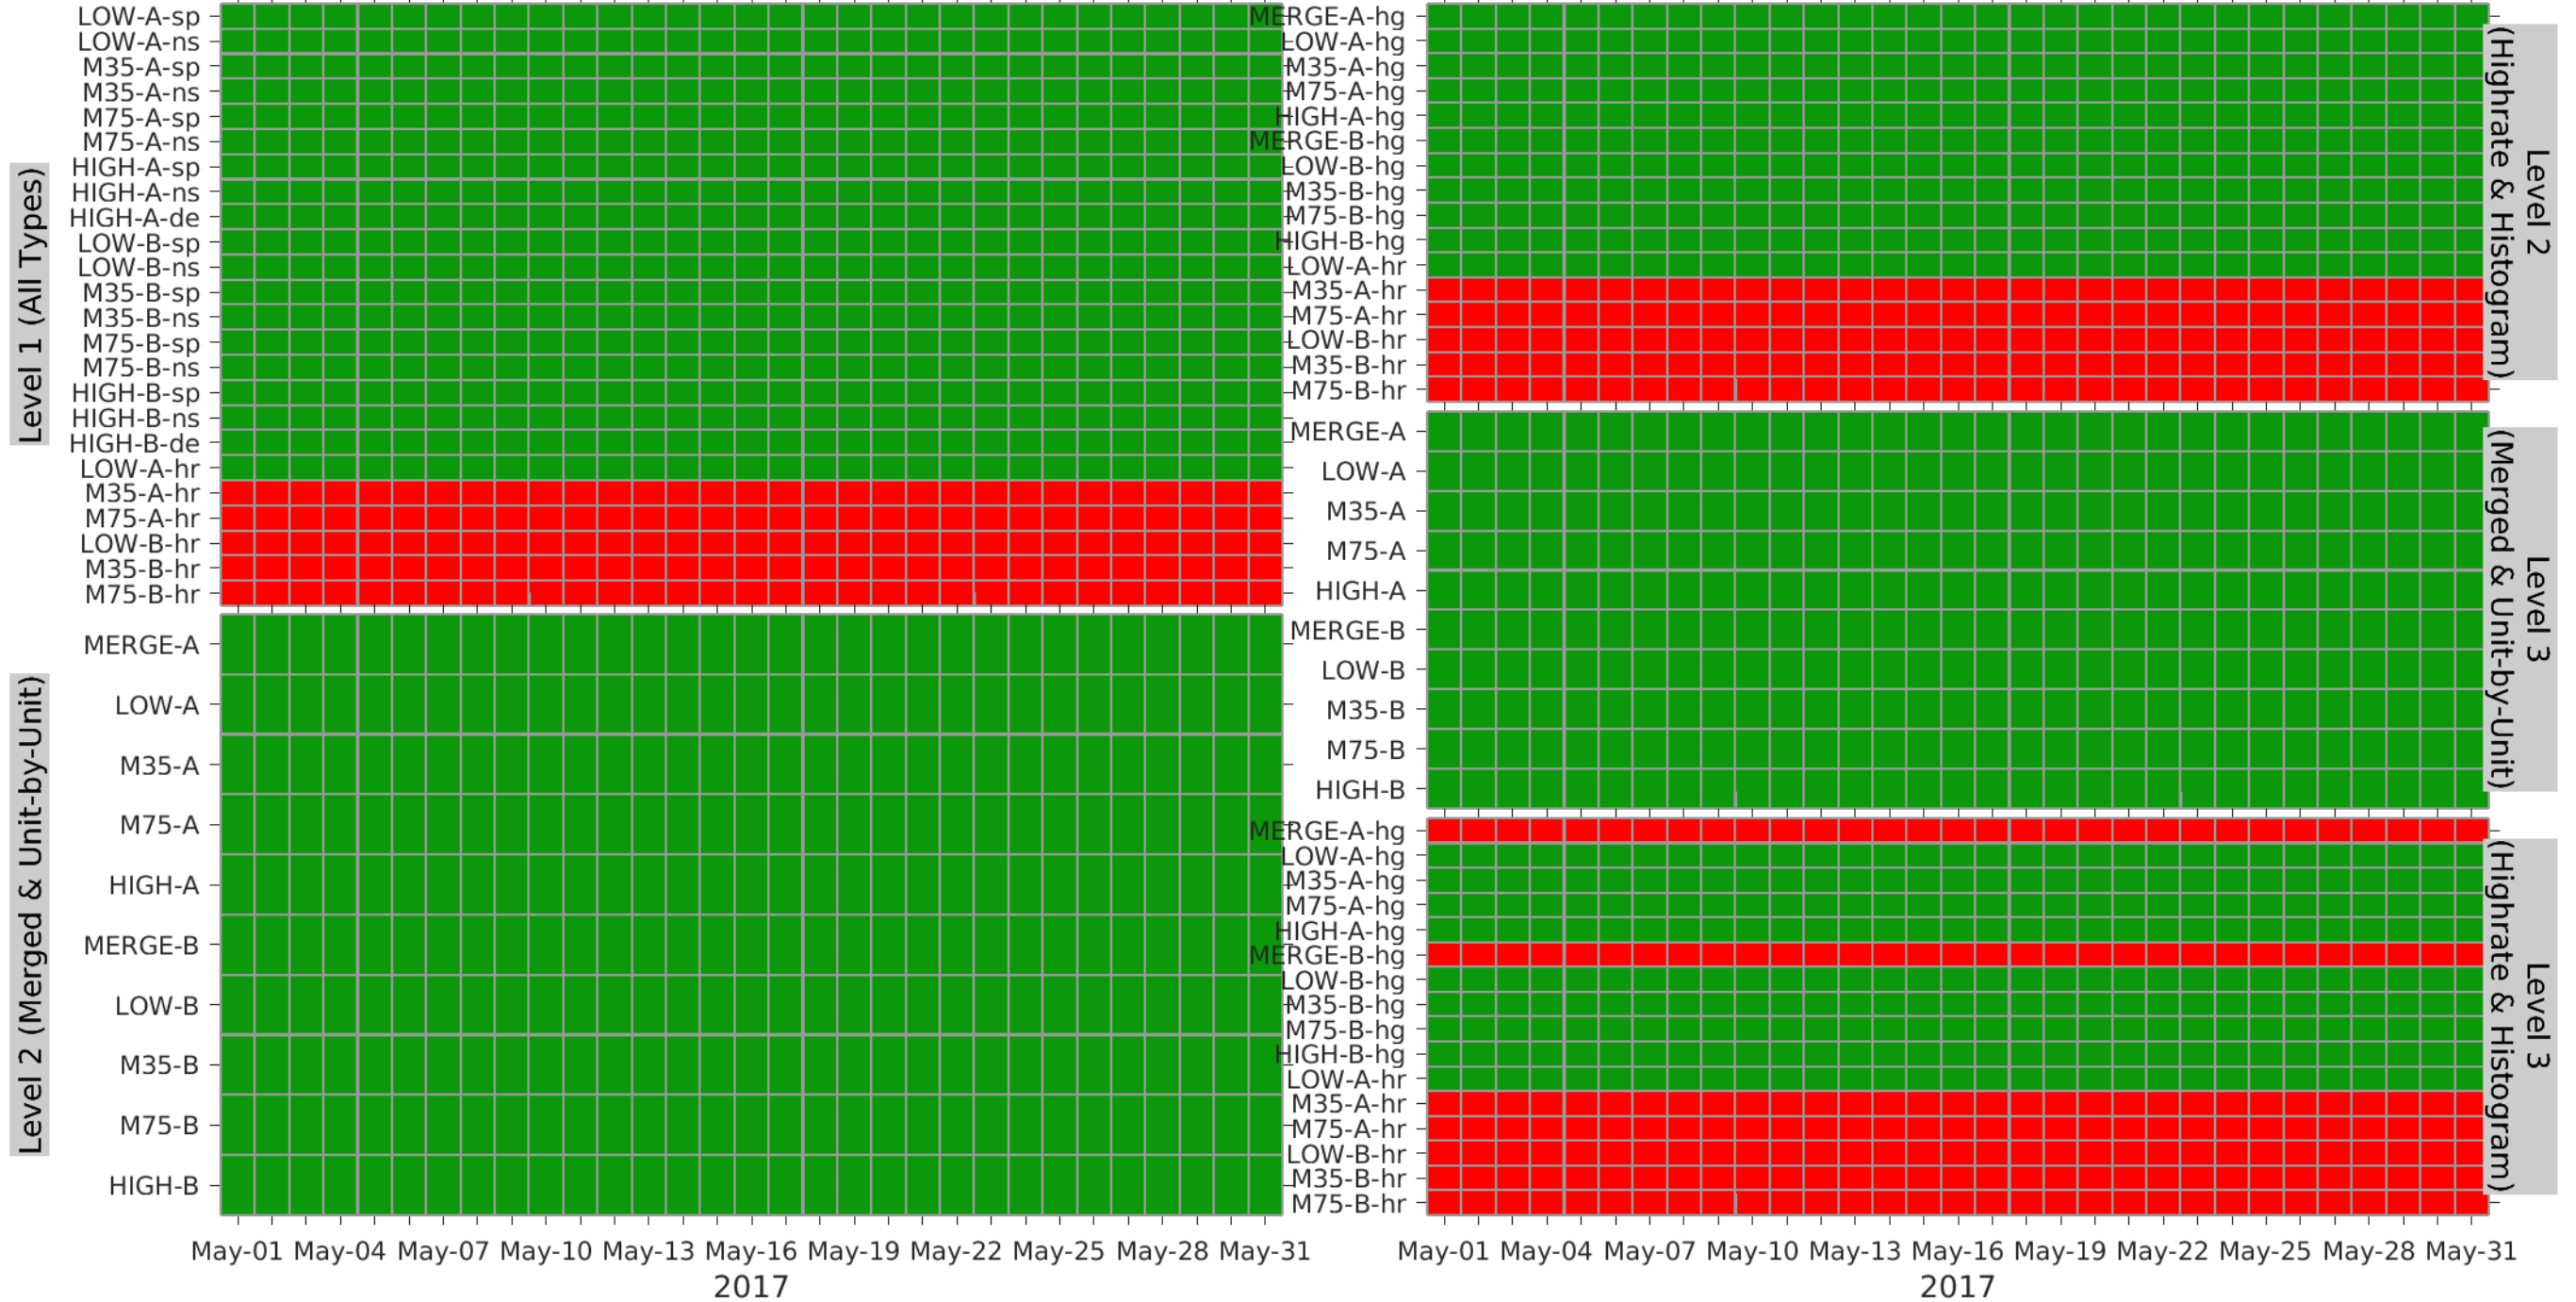

MagEIS Data Files | Created on: 2021/10/21 | Green = File Exists | Red = File Does Not Exist

sp=spin-based (science) | ns=non-science (housekeeping & status) | hr=highrate (LOW/MED only) | hg=histogram | de=direct event (HIGH only)

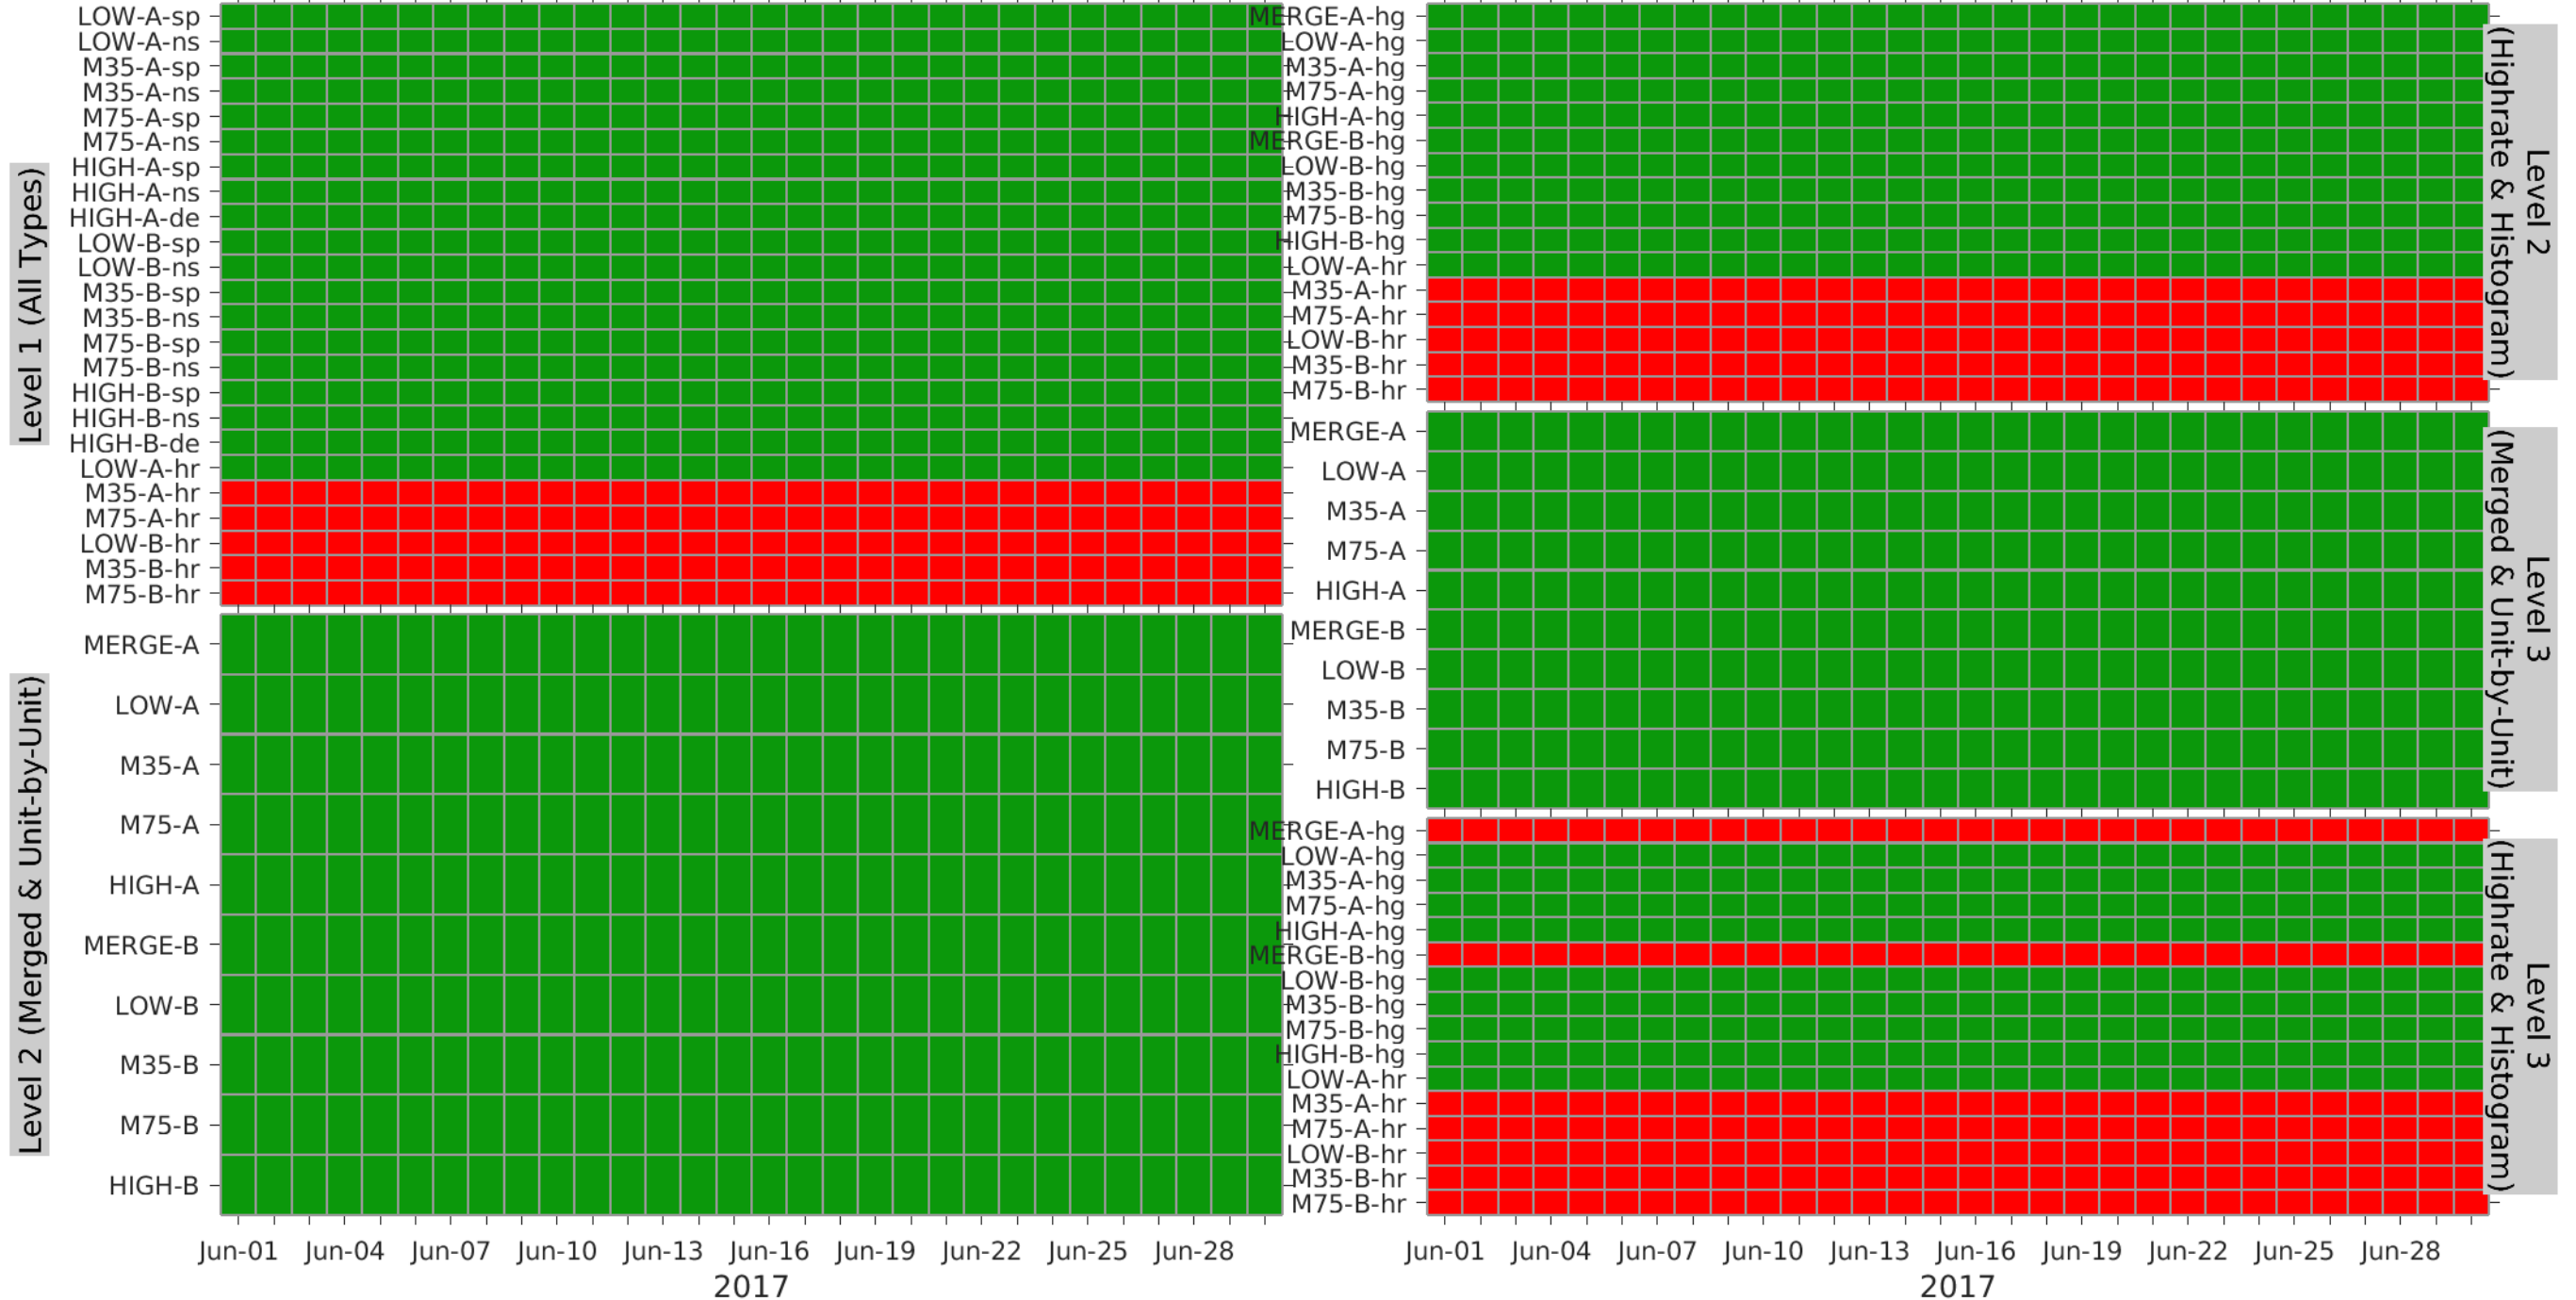

MagEIS Data Files | Created on: 2021/10/21 | Green = File Exists | Red = File Does Not Exist

sp=spin-based (science) | ns=non-science (housekeeping & status) | hr=highrate (LOW/MED only) | hg=histogram | de=direct event (HIGH only)

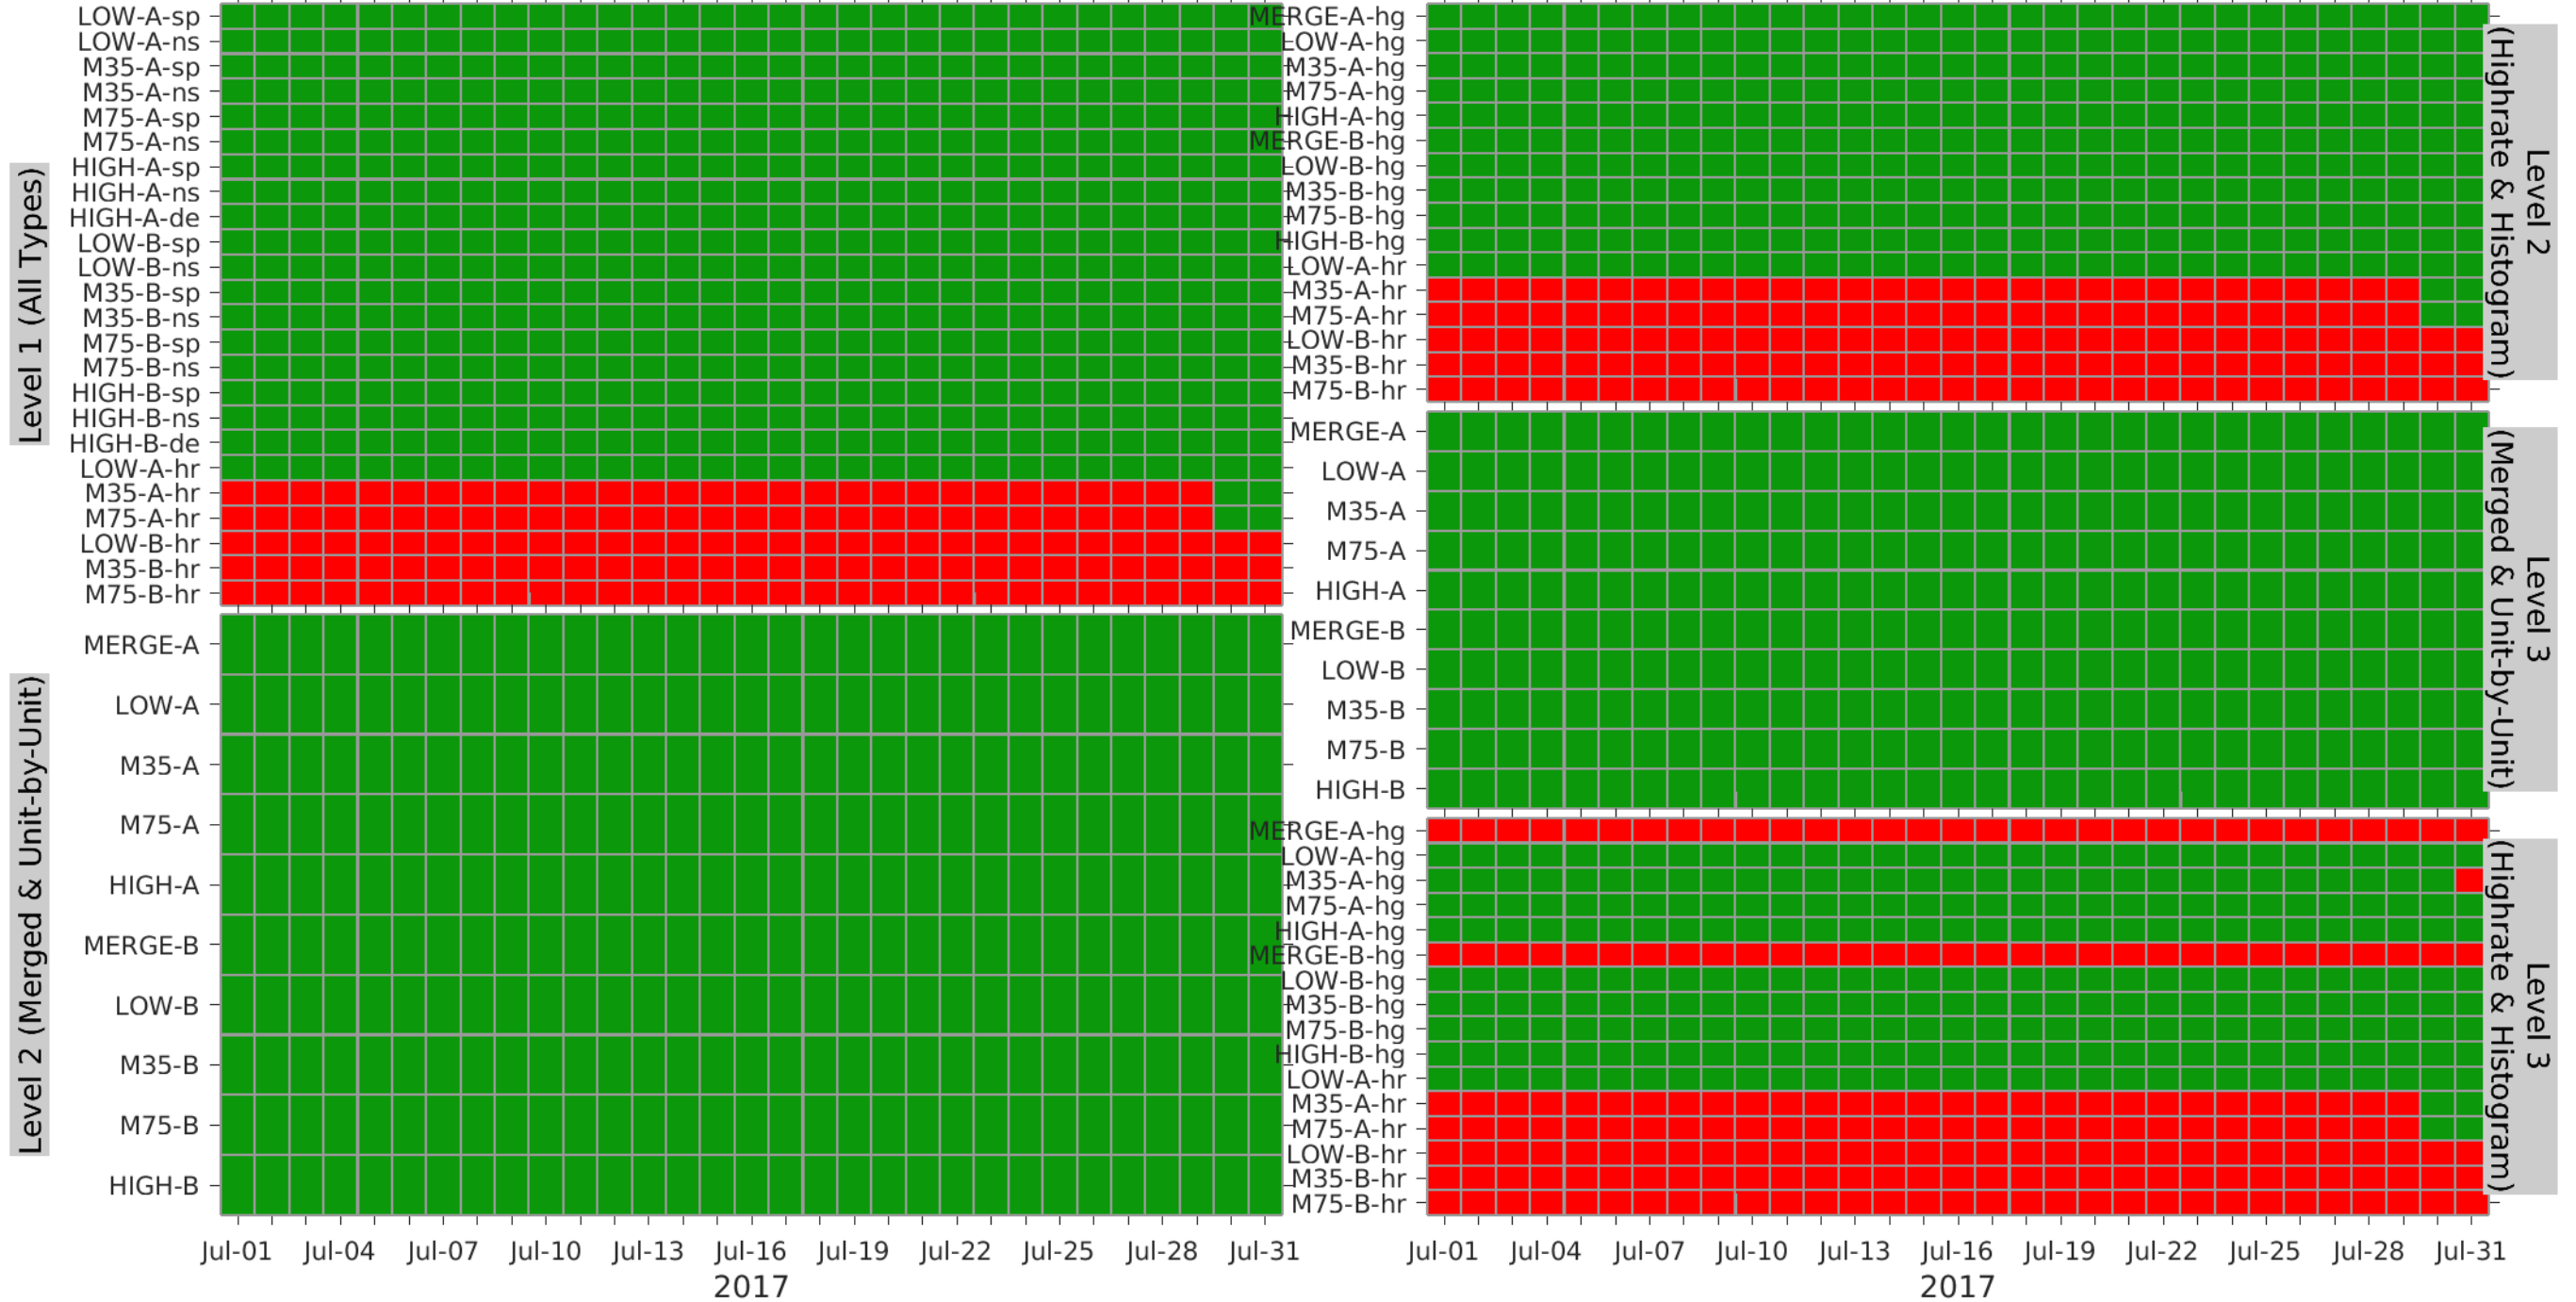

MagEIS Data Files | Created on: 2021/10/21 | Green = File Exists | Red = File Does Not Exist

sp=spin-based (science) | ns=non-science (housekeeping & status) | hr=highrate (LOW/MED only) | hg=histogram | de=direct event (HIGH only)

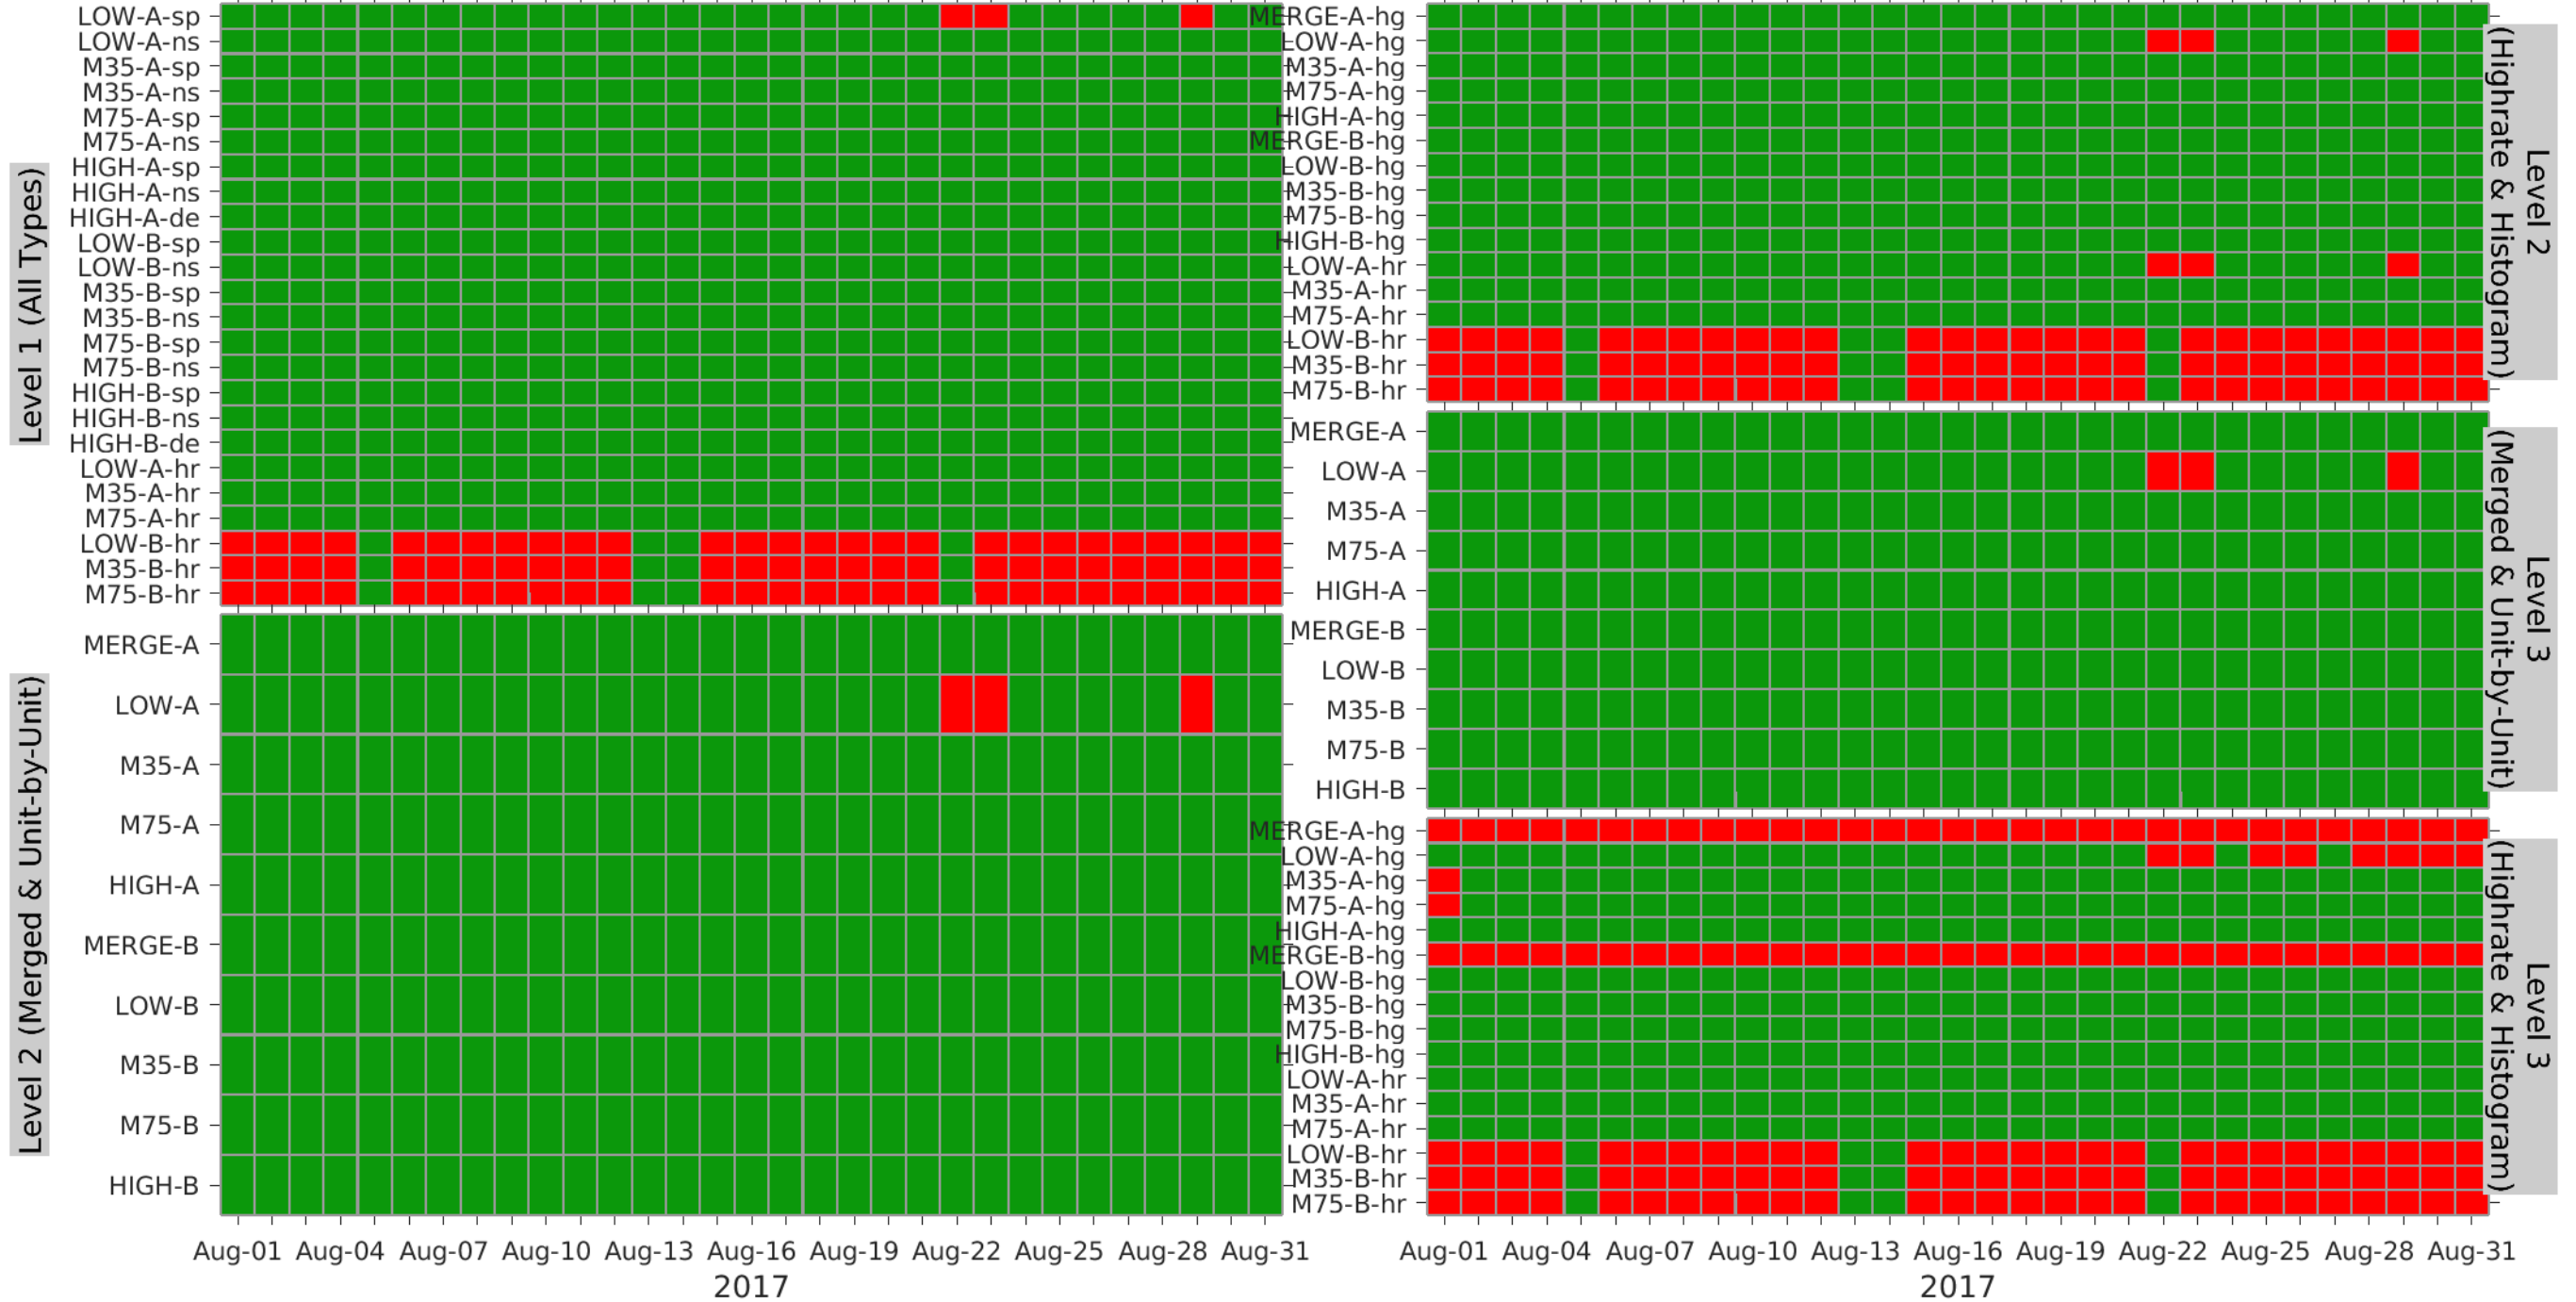

MagEIS Data Files | Created on: 2021/10/21 | Green = File Exists | Red = File Does Not Exist

sp=spin-based (science) | ns=non-science (housekeeping & status) | hr=highrate (LOW/MED only) | hg=histogram | de=direct event (HIGH only)

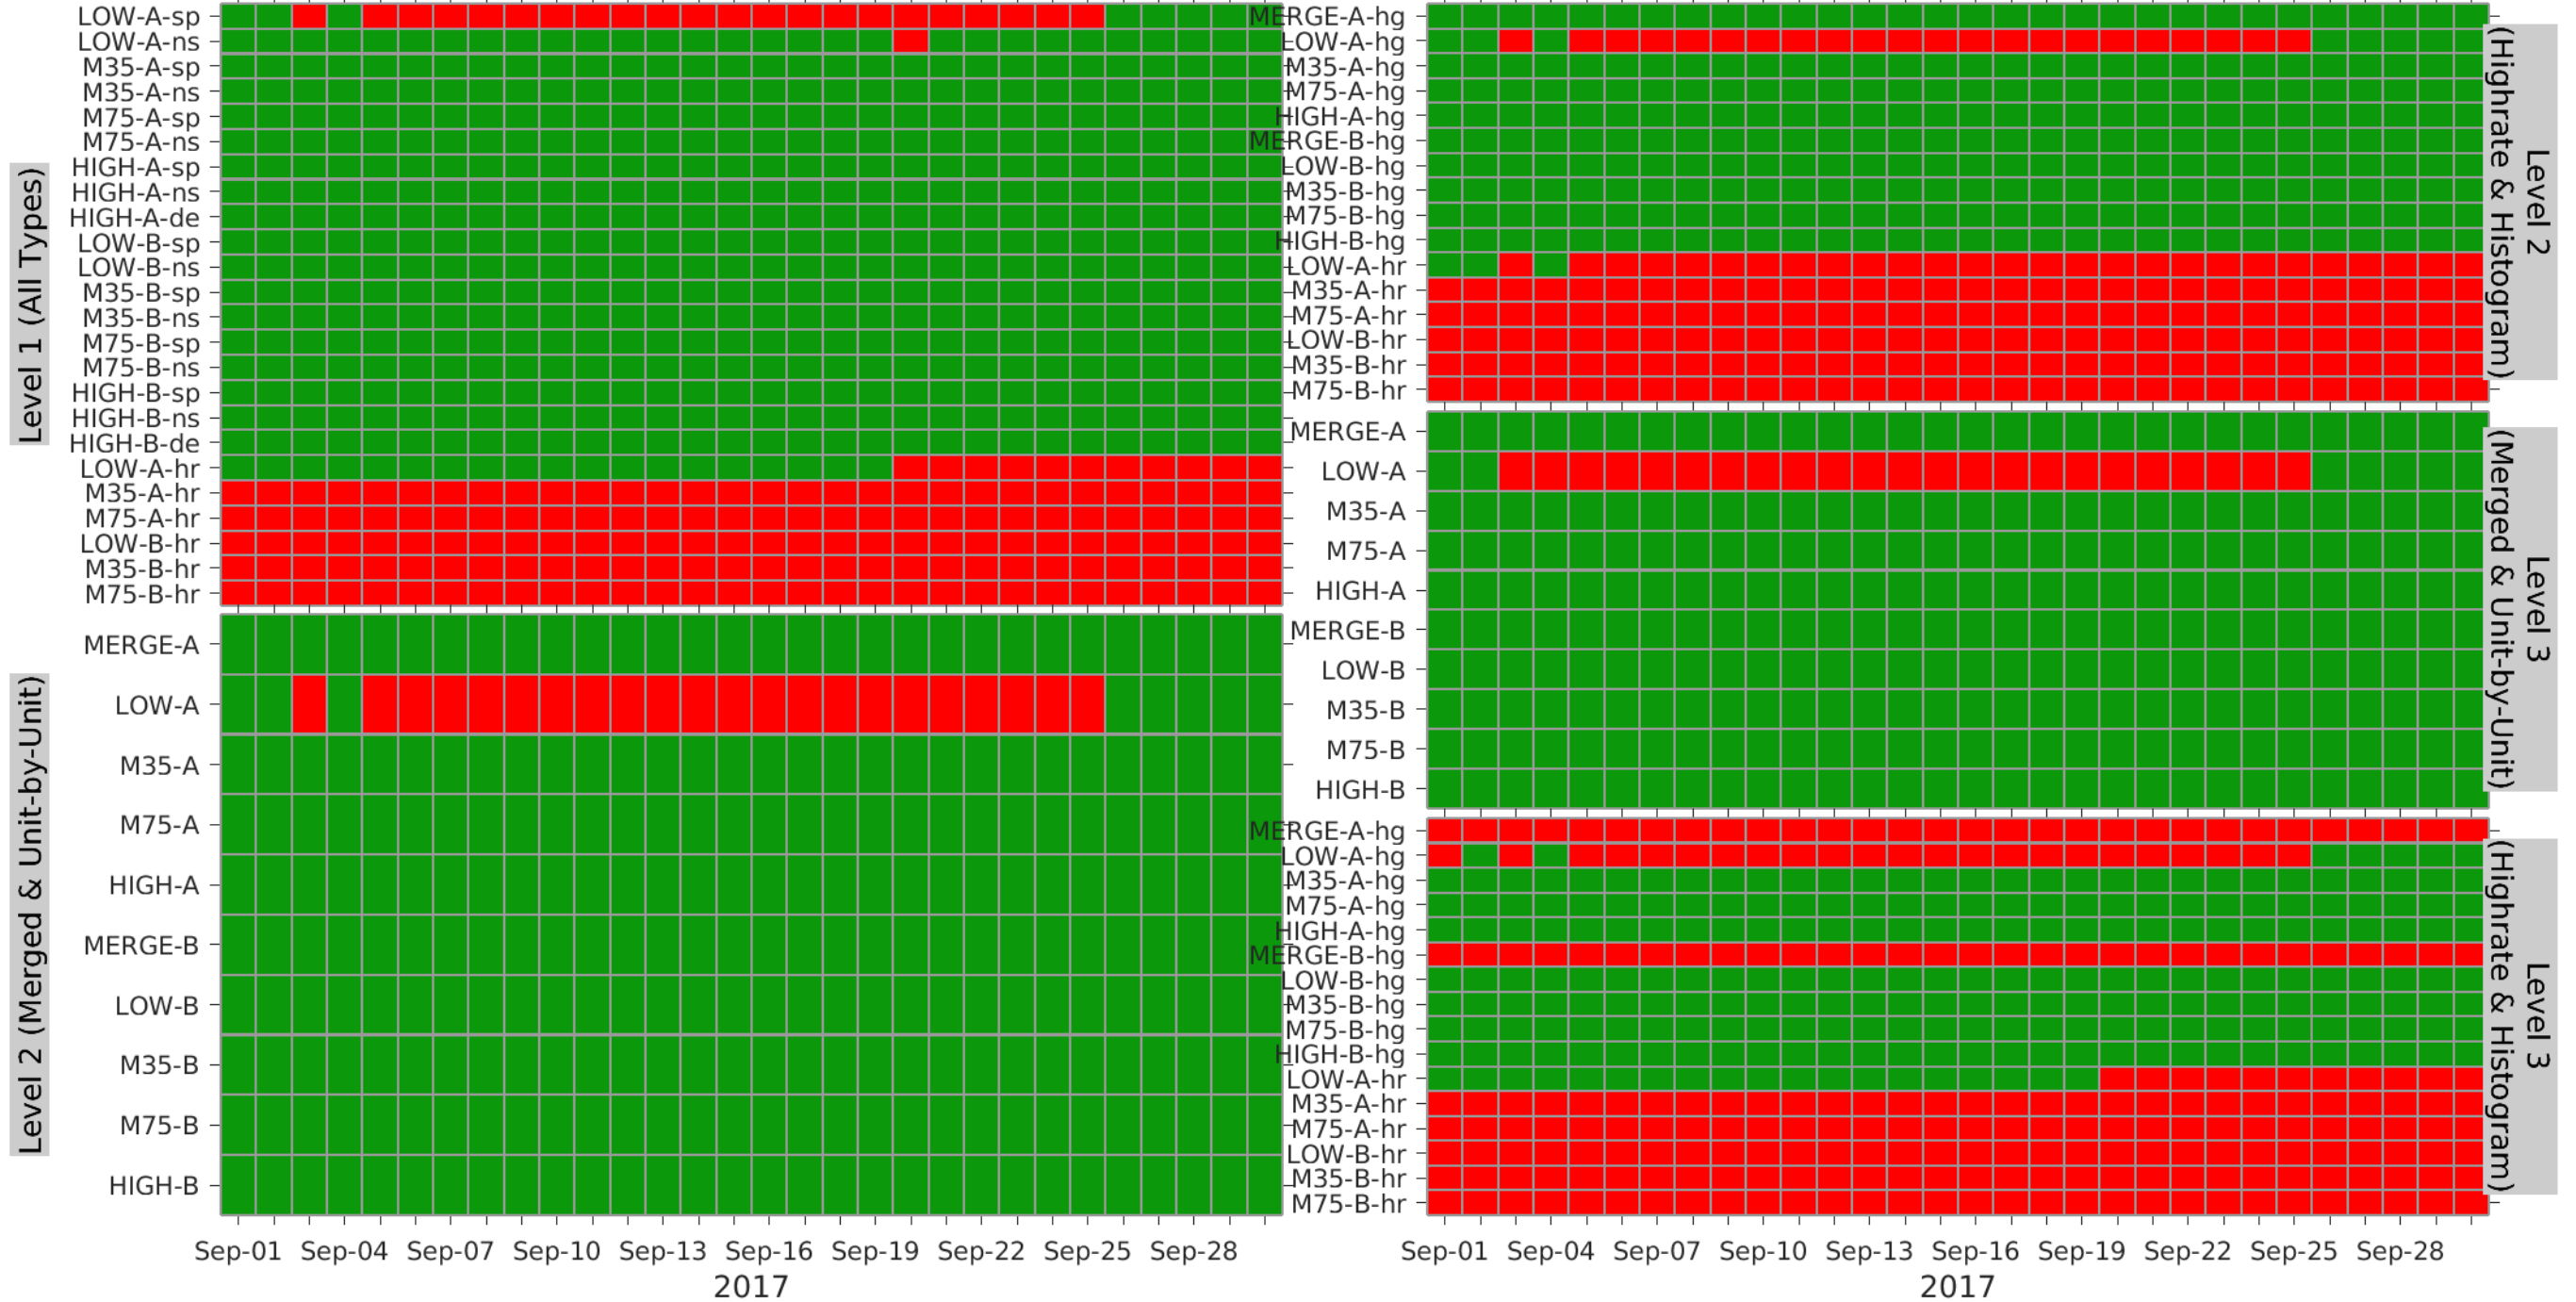

MagEIS Data Files | Created on: 2021/10/21 | Green = File Exists | Red = File Does Not Exist

sp=spin-based (science) | ns=non-science (housekeeping & status) | hr=highrate (LOW/MED only) | hg=histogram | de=direct event (HIGH only)

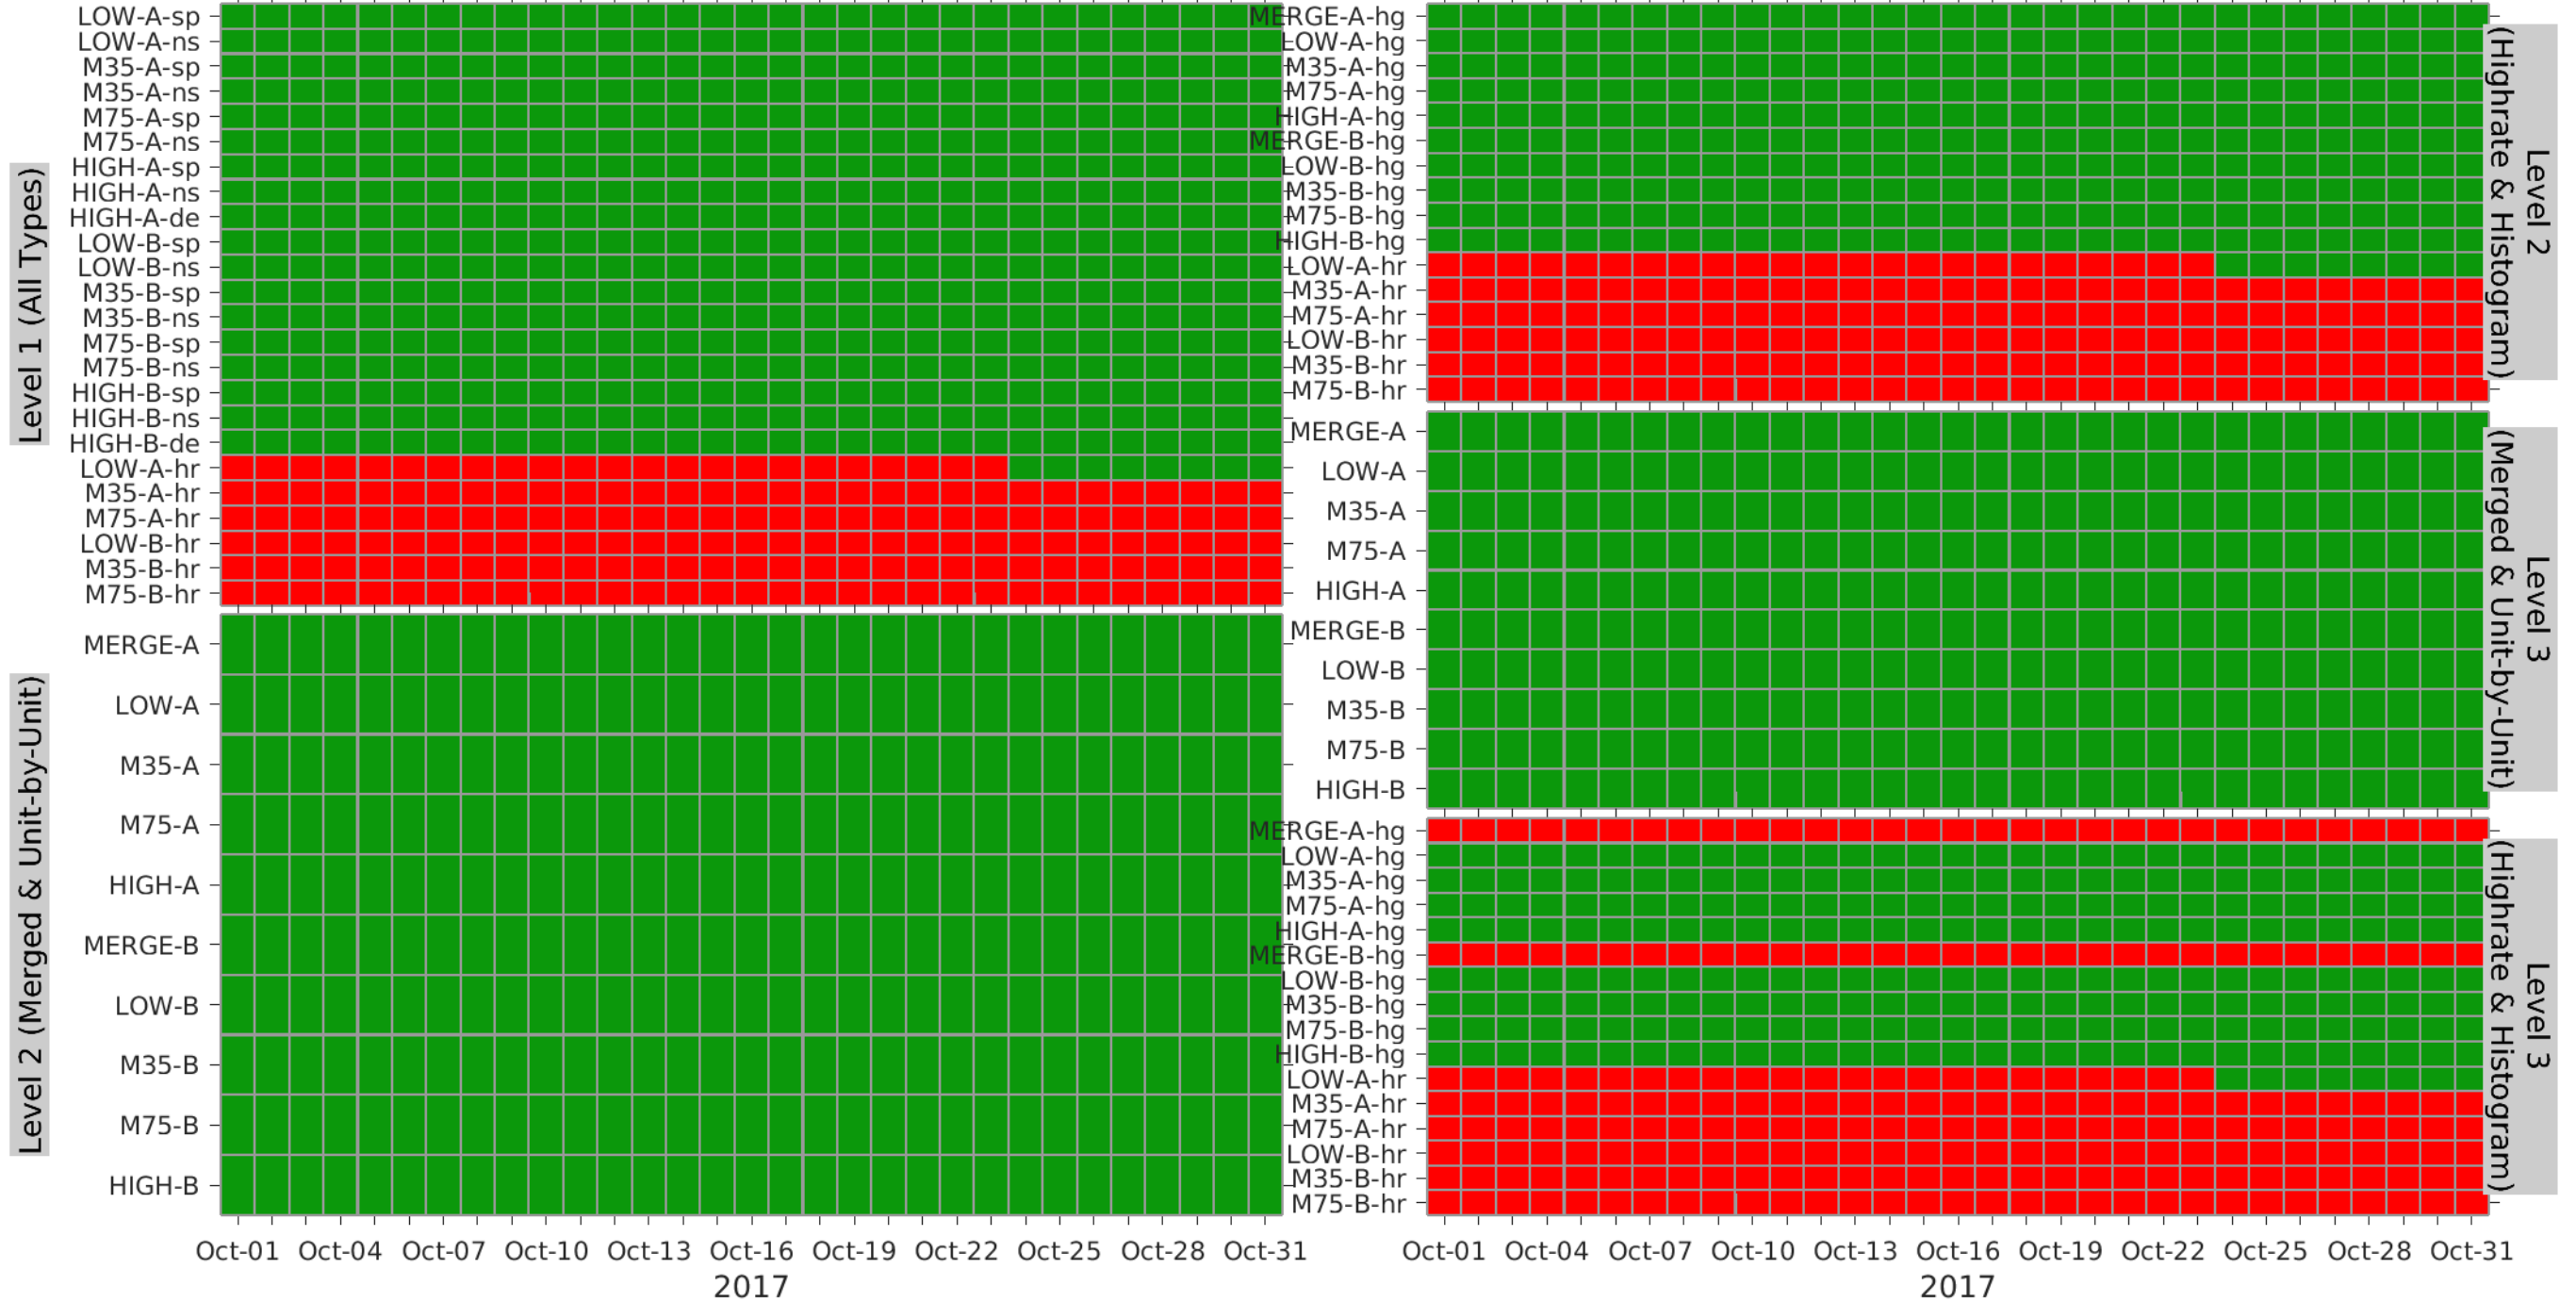

MagEIS Data Files | Created on: 2021/10/21 | Green = File Exists | Red = File Does Not Exist

sp=spin-based (science) | ns=non-science (housekeeping & status) | hr=highrate (LOW/MED only) | hg=histogram | de=direct event (HIGH only)

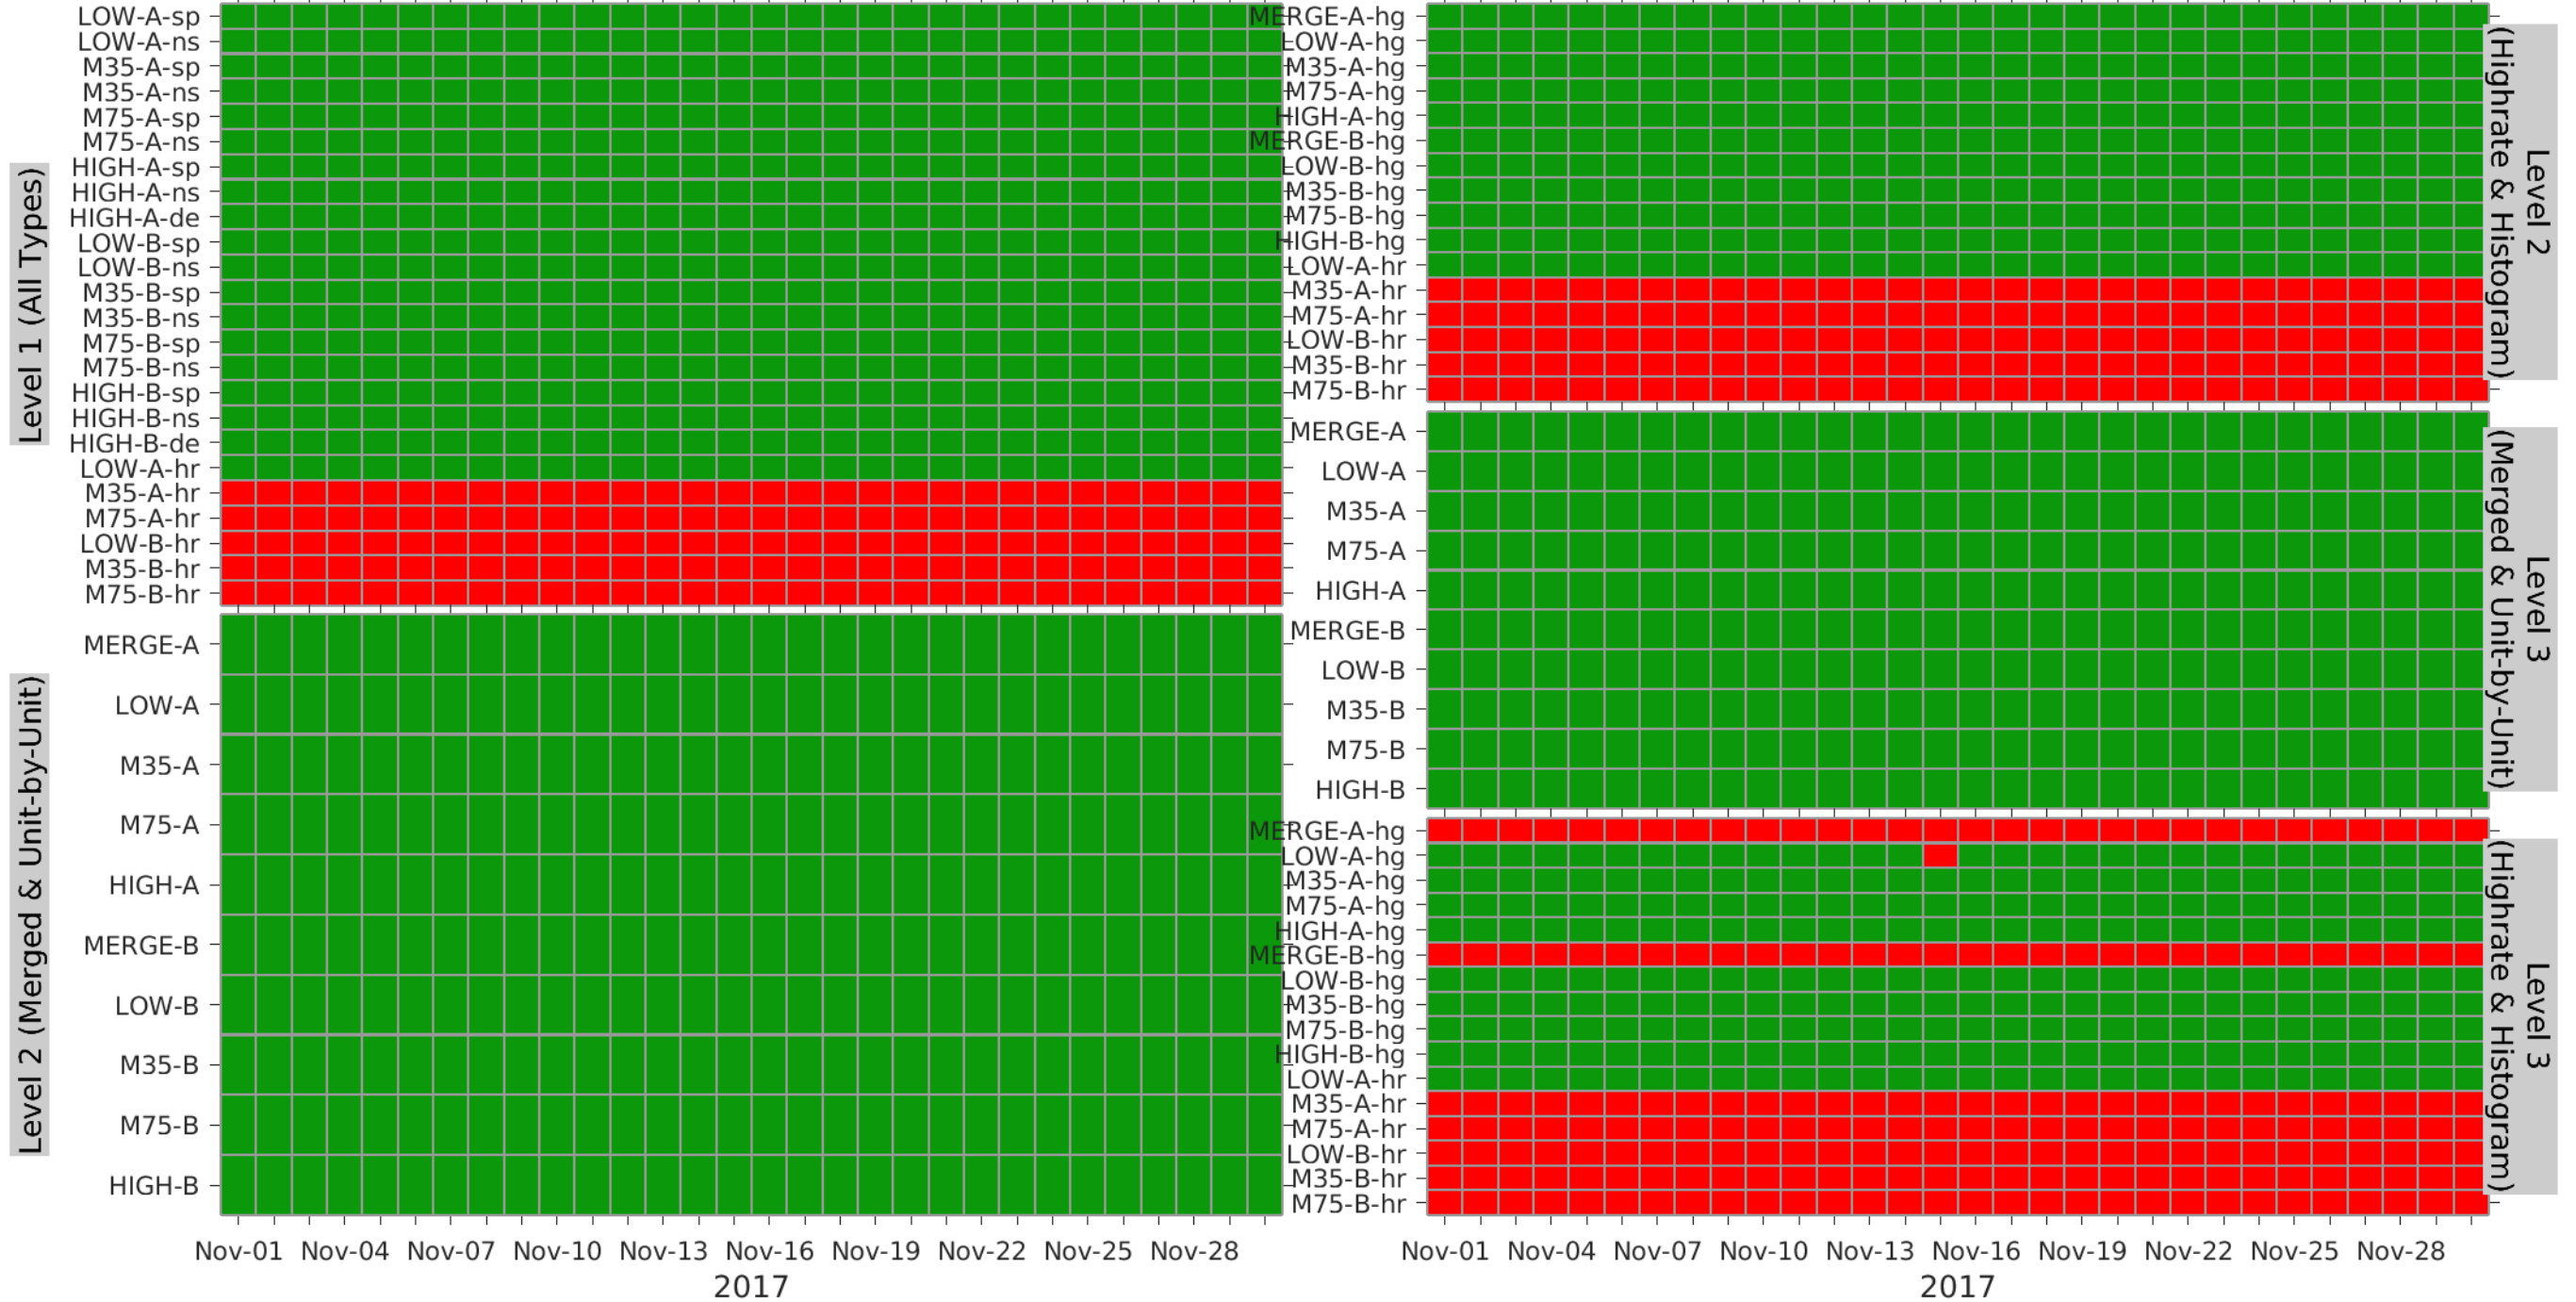



MagEIS Data Files | Created on: 2021/10/21 | Green = File Exists | Red = File Does Not Exist

sp=spin-based (science) | ns=non-science (housekeeping & status) | hr=highrate (LOW/MED only) | hg=histogram | de=direct event (HIGH only)

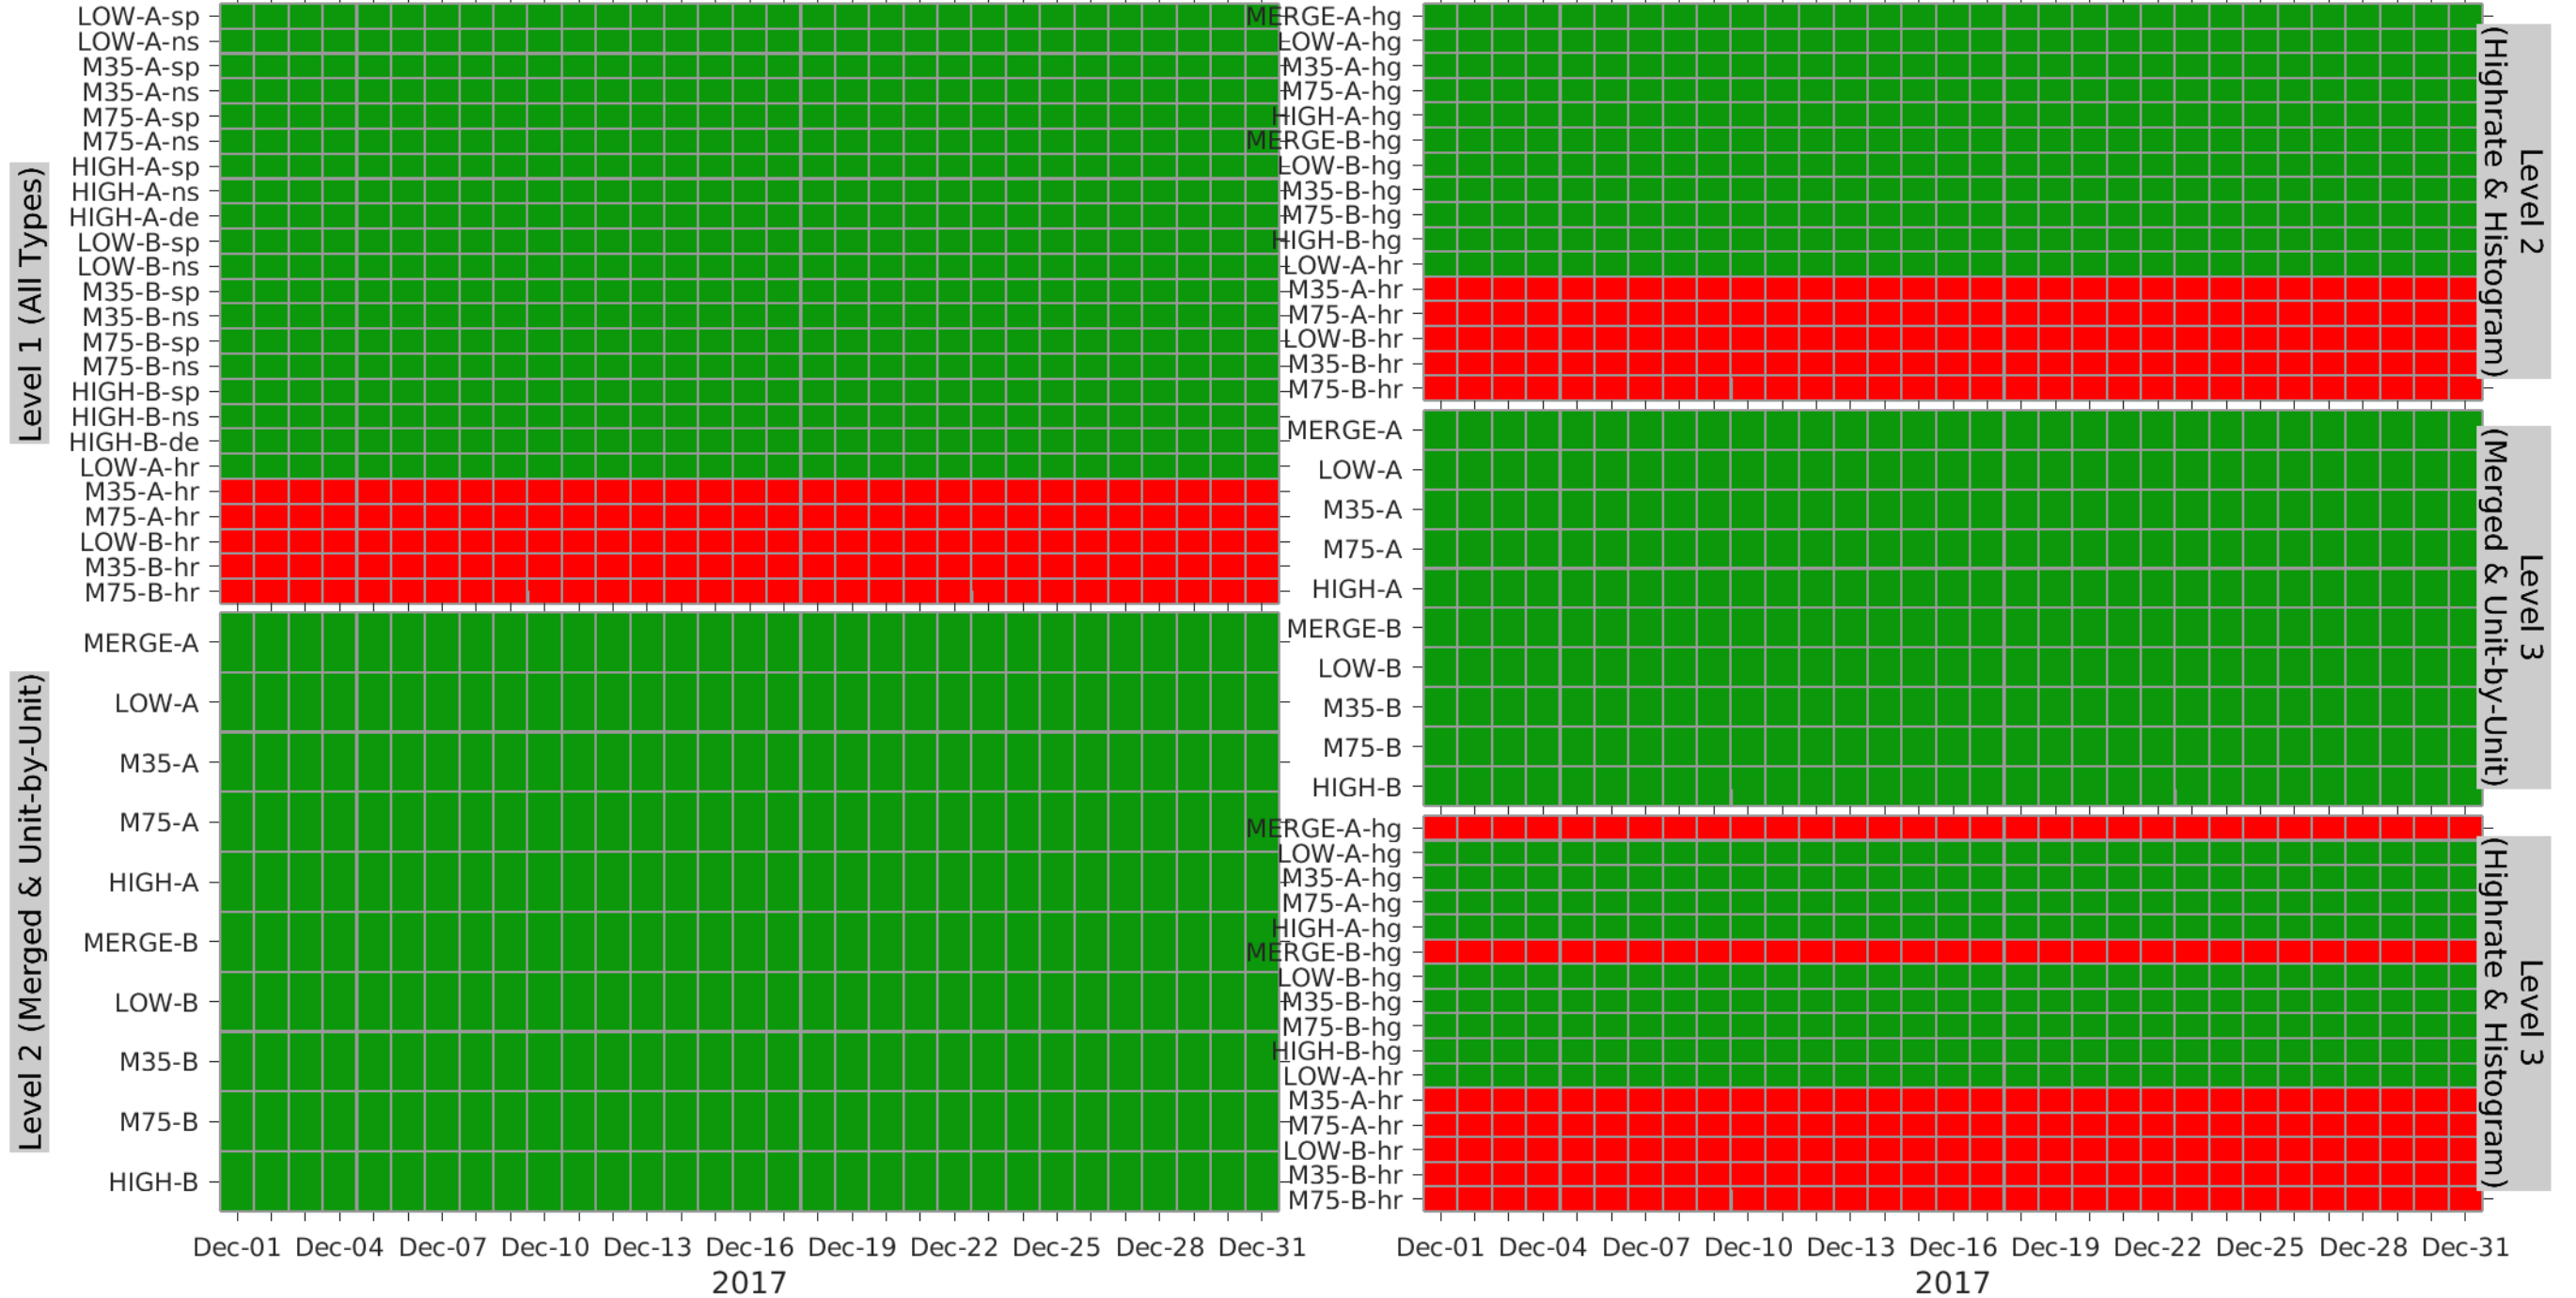

MagEIS Data Files | Created on: 2021/10/21 | Green = File Exists | Red = File Does Not Exist

sp=spin-based (science) | ns=non-science (housekeeping & status) | hr=highrate (LOW/MED only) | hg=histogram | de=direct event (HIGH only)

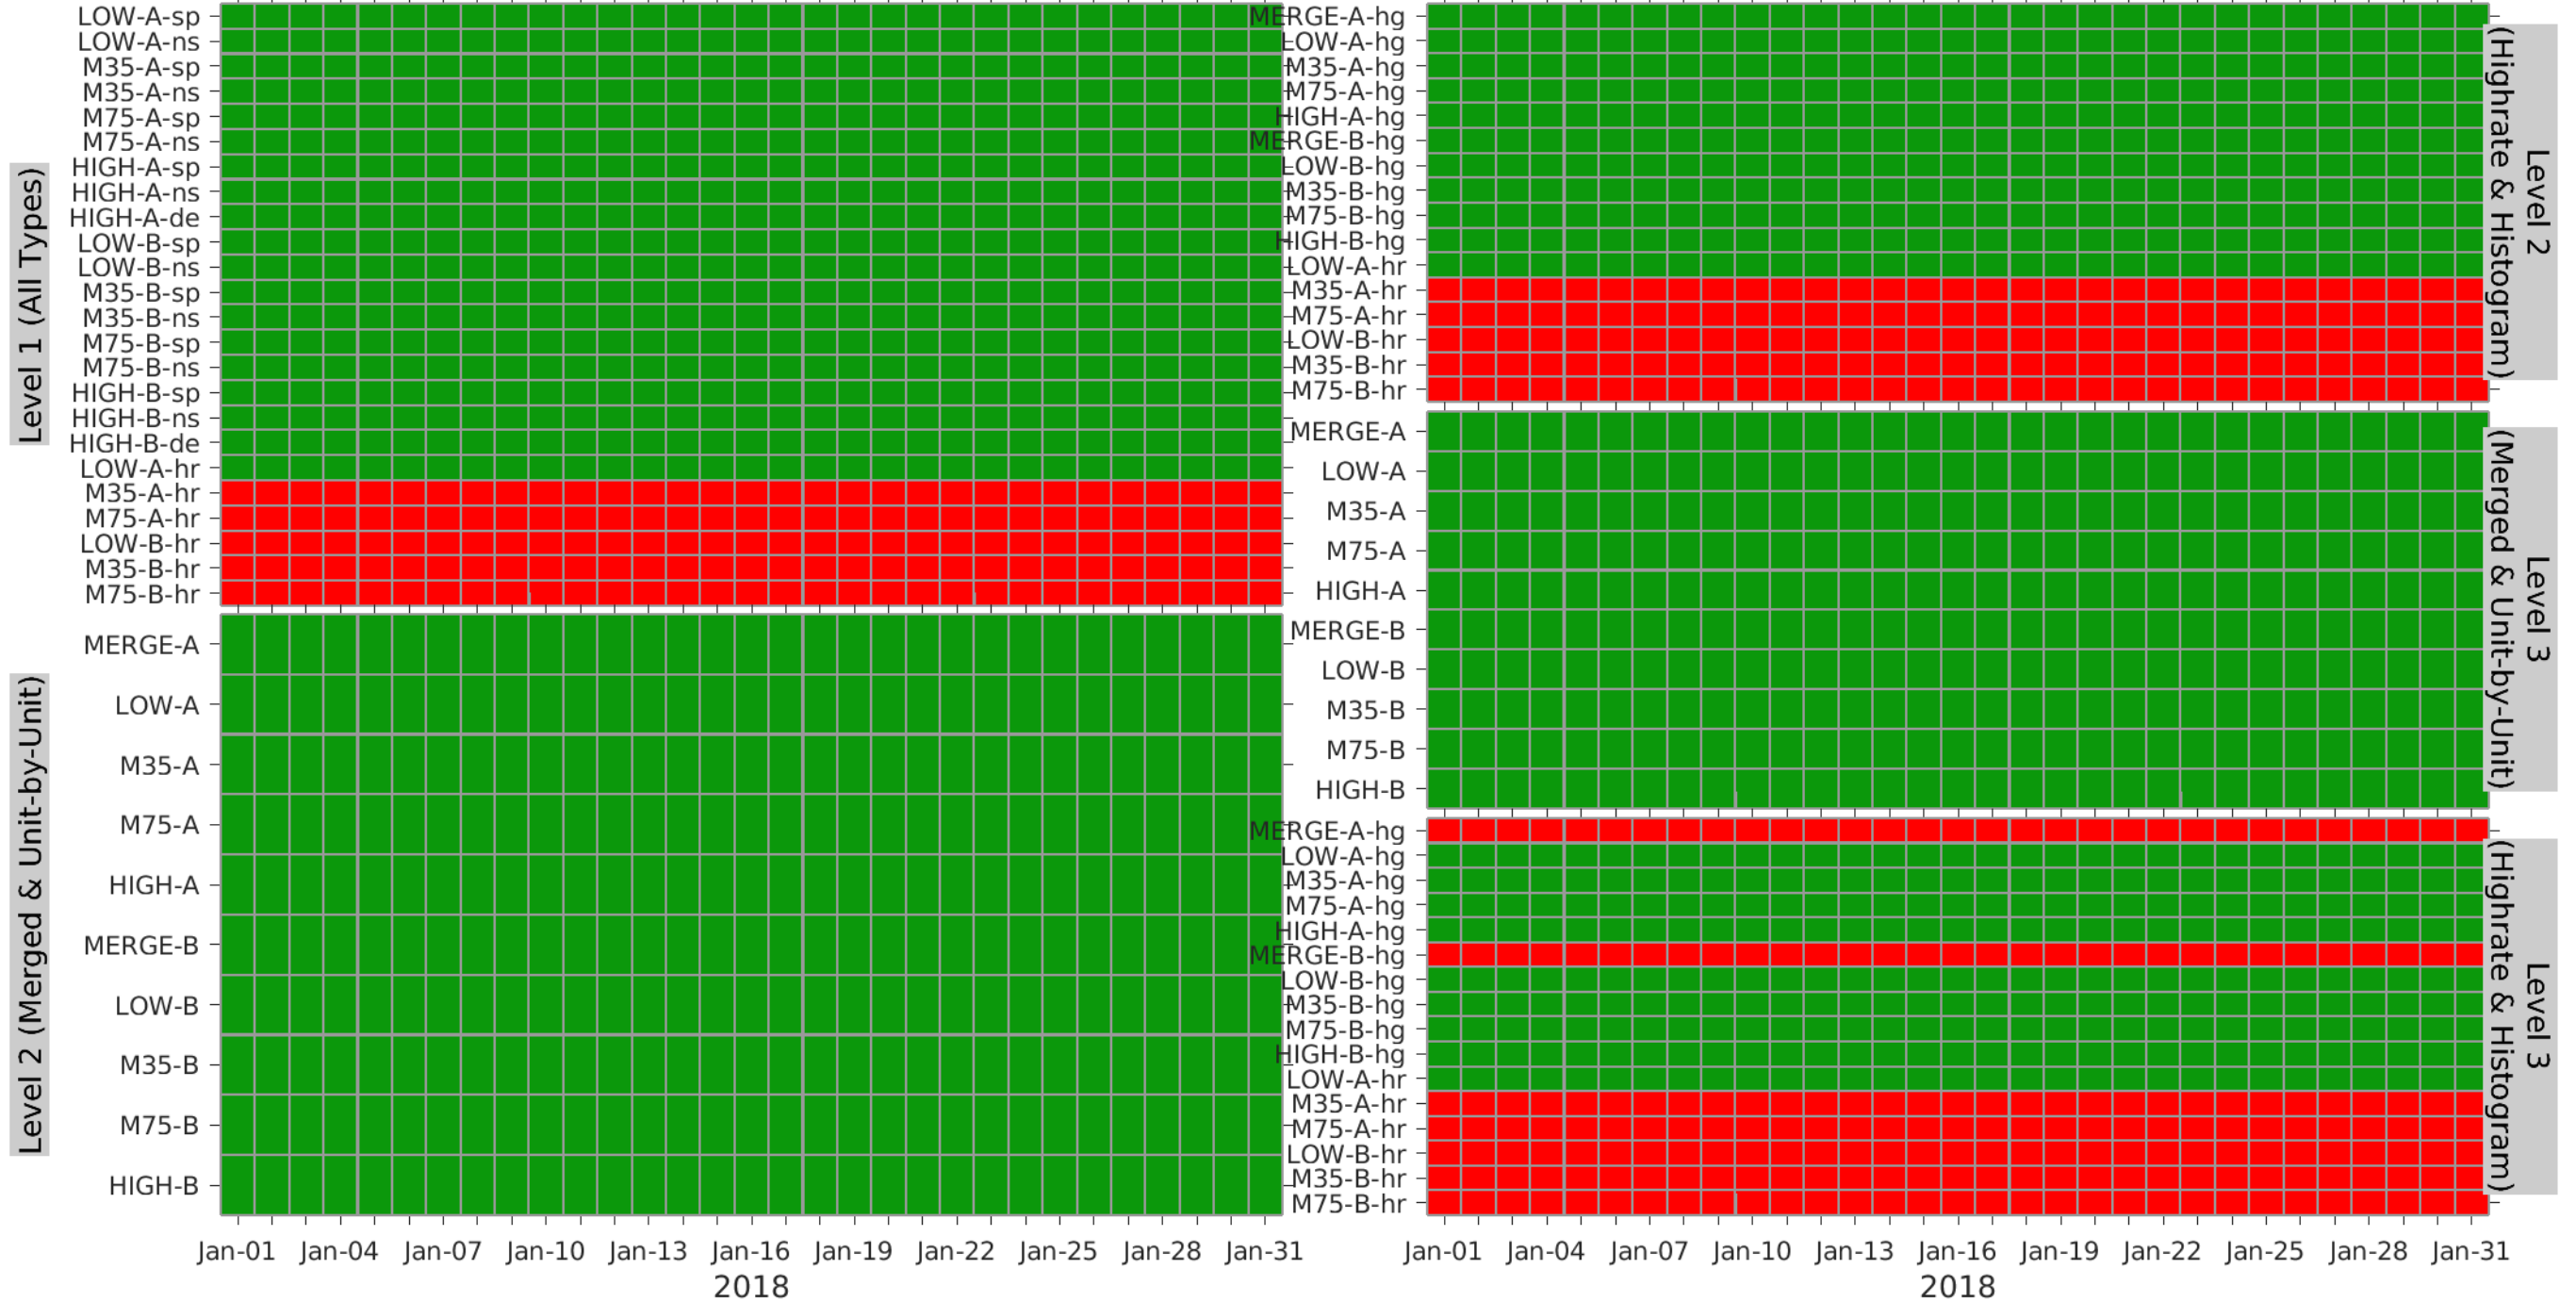

MagEIS Data Files | Created on: 2021/10/21 | Green = File Exists | Red = File Does Not Exist

sp=spin-based (science) | ns=non-science (housekeeping & status) | hr=highrate (LOW/MED only) | hg=histogram | de=direct event (HIGH only)

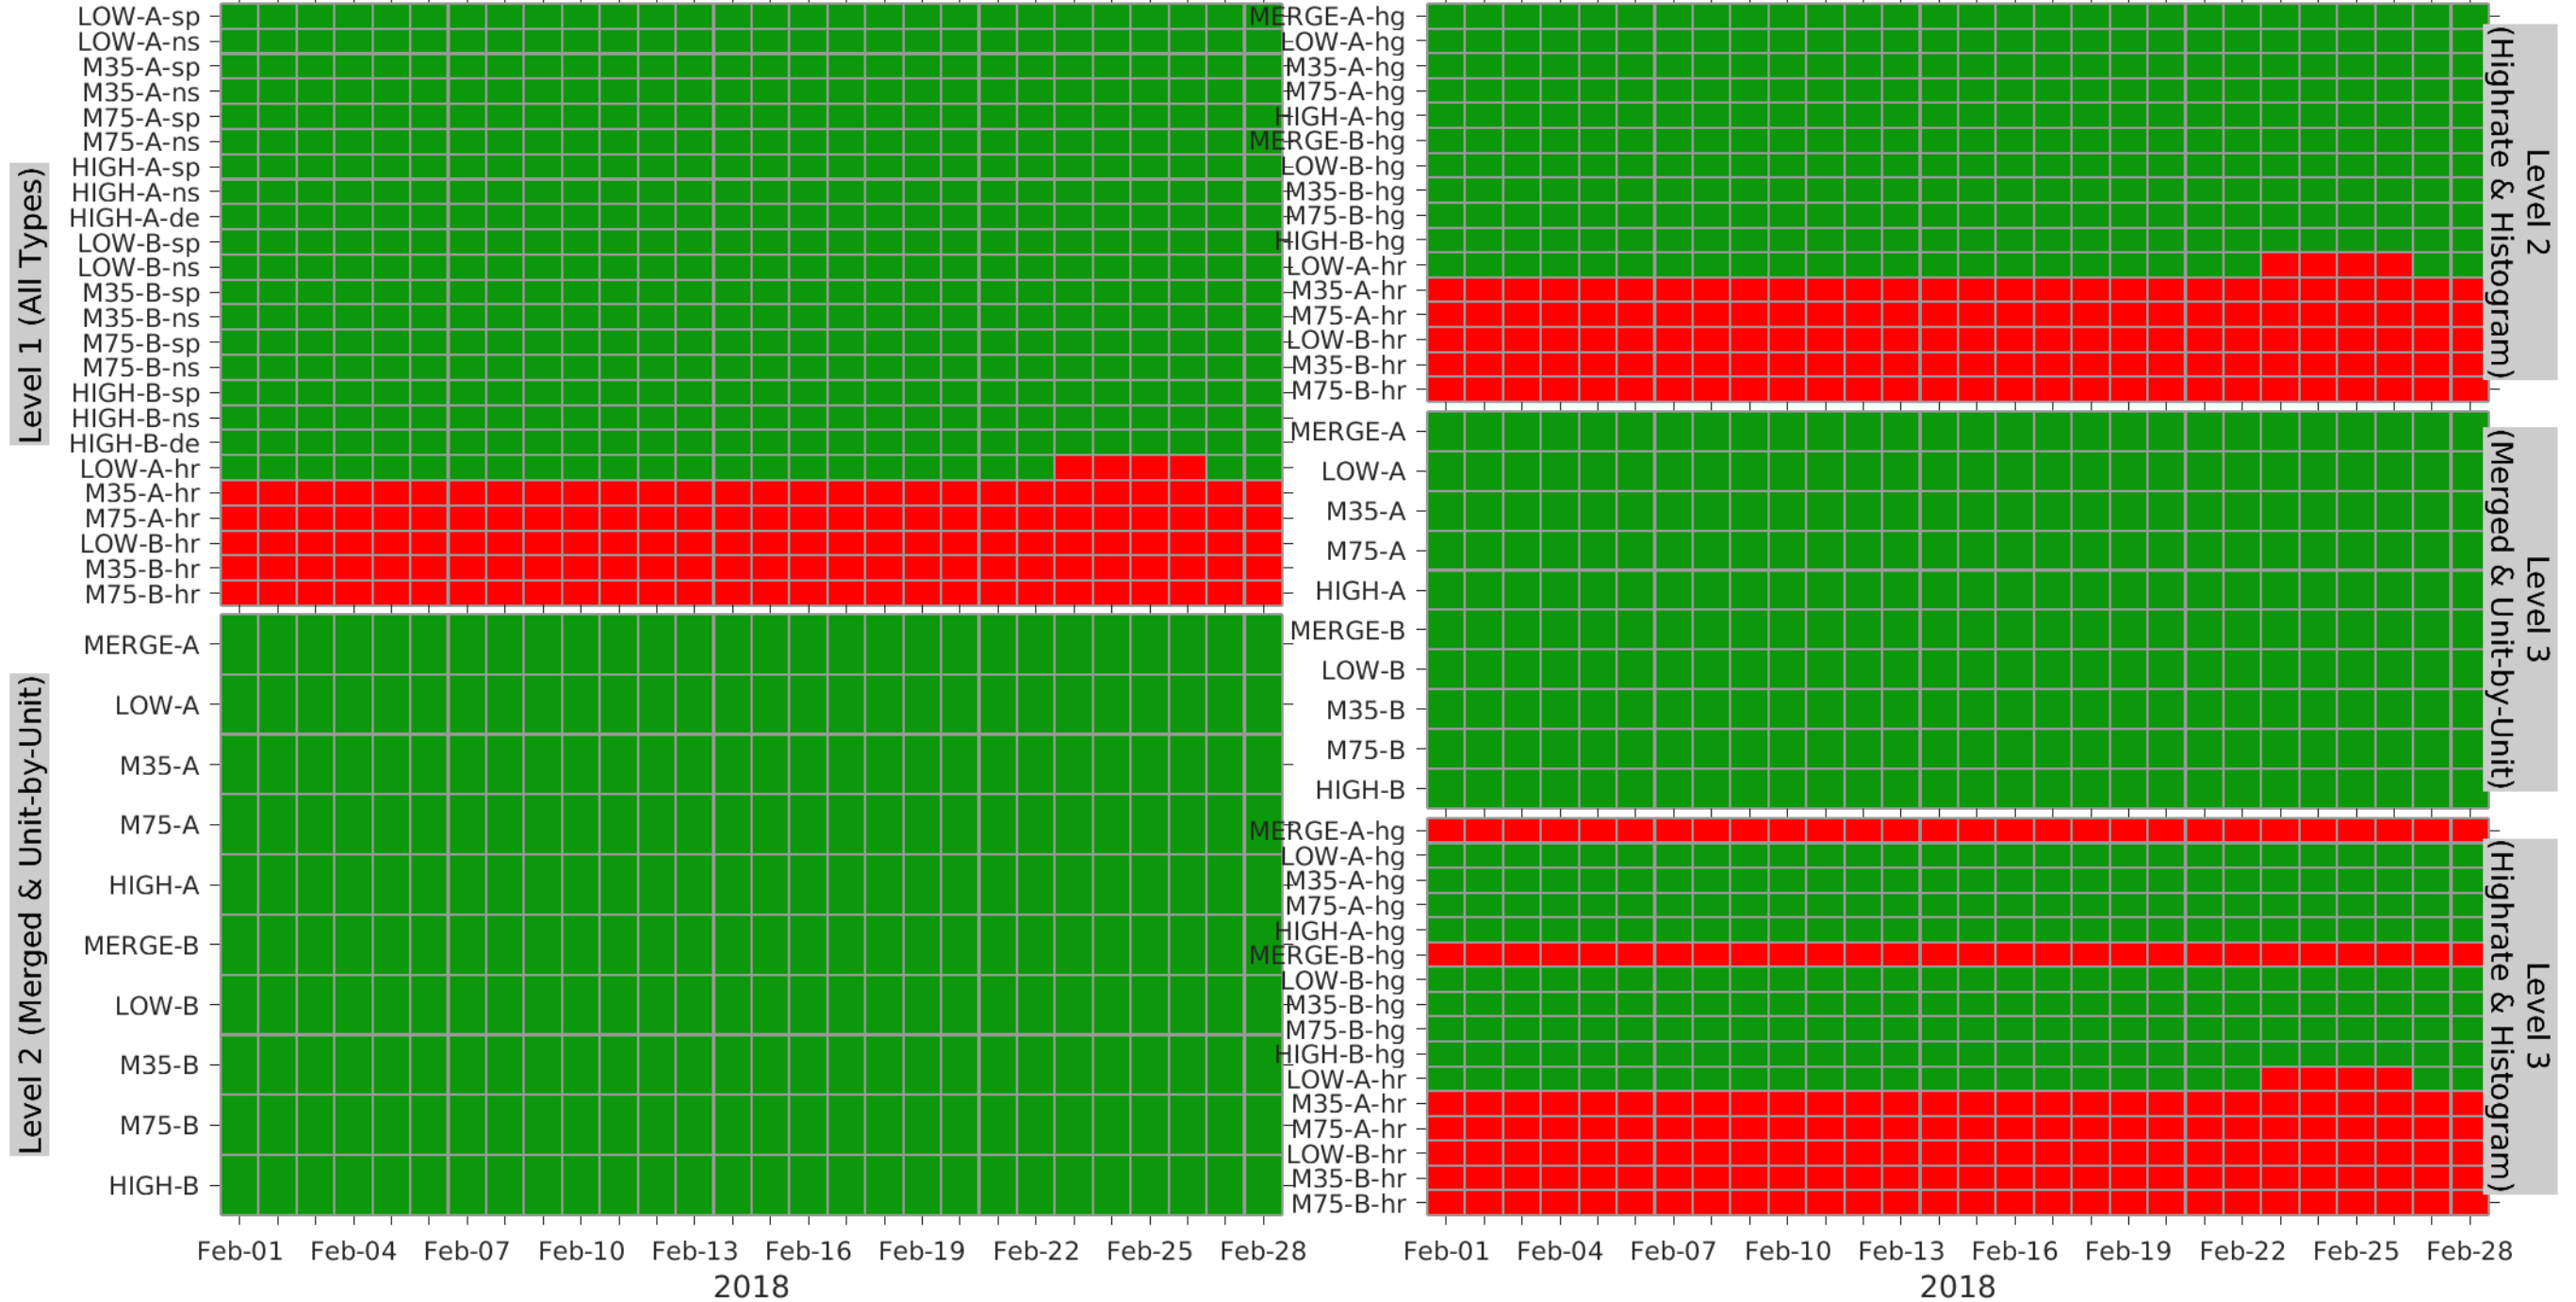

sp=spin-based (science) | ns=non-science (housekeeping & status) | hr=highrate (LOW/MED only) | hg=histogram | de=direct event (HIGH only)

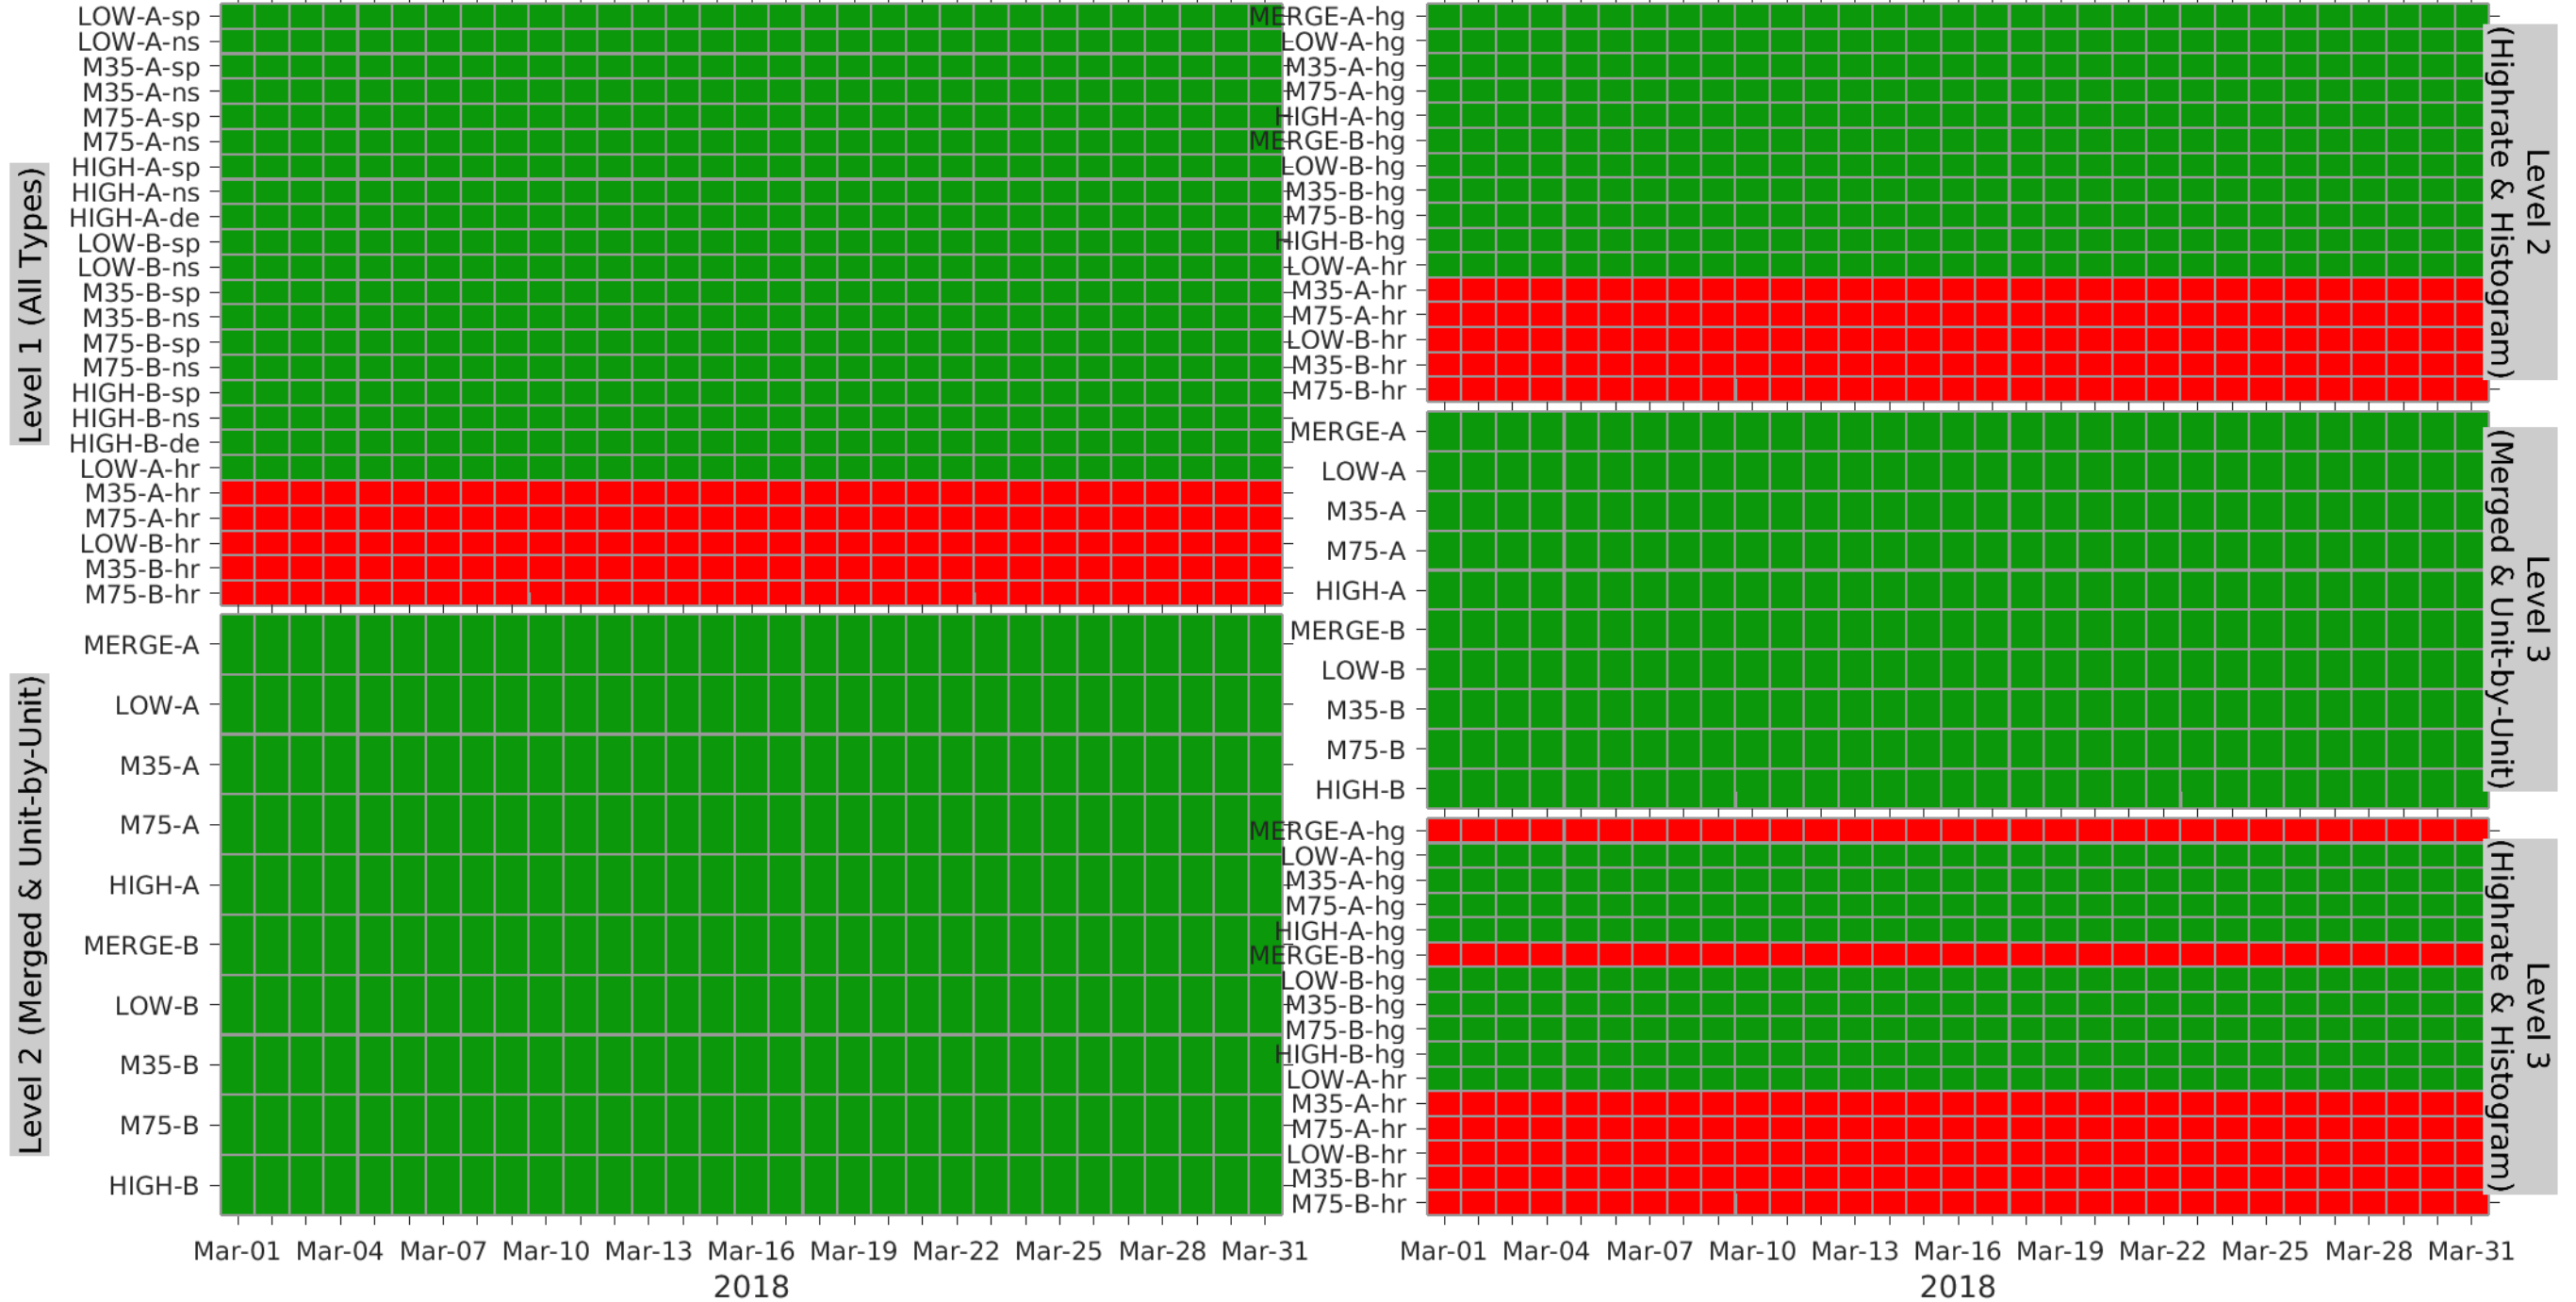

MagEIS Data Files | Created on: 2021/10/21 | Green = File Exists | Red = File Does Not Exist

sp=spin-based (science) | ns=non-science (housekeeping & status) | hr=highrate (LOW/MED only) | hg=histogram | de=direct event (HIGH only)

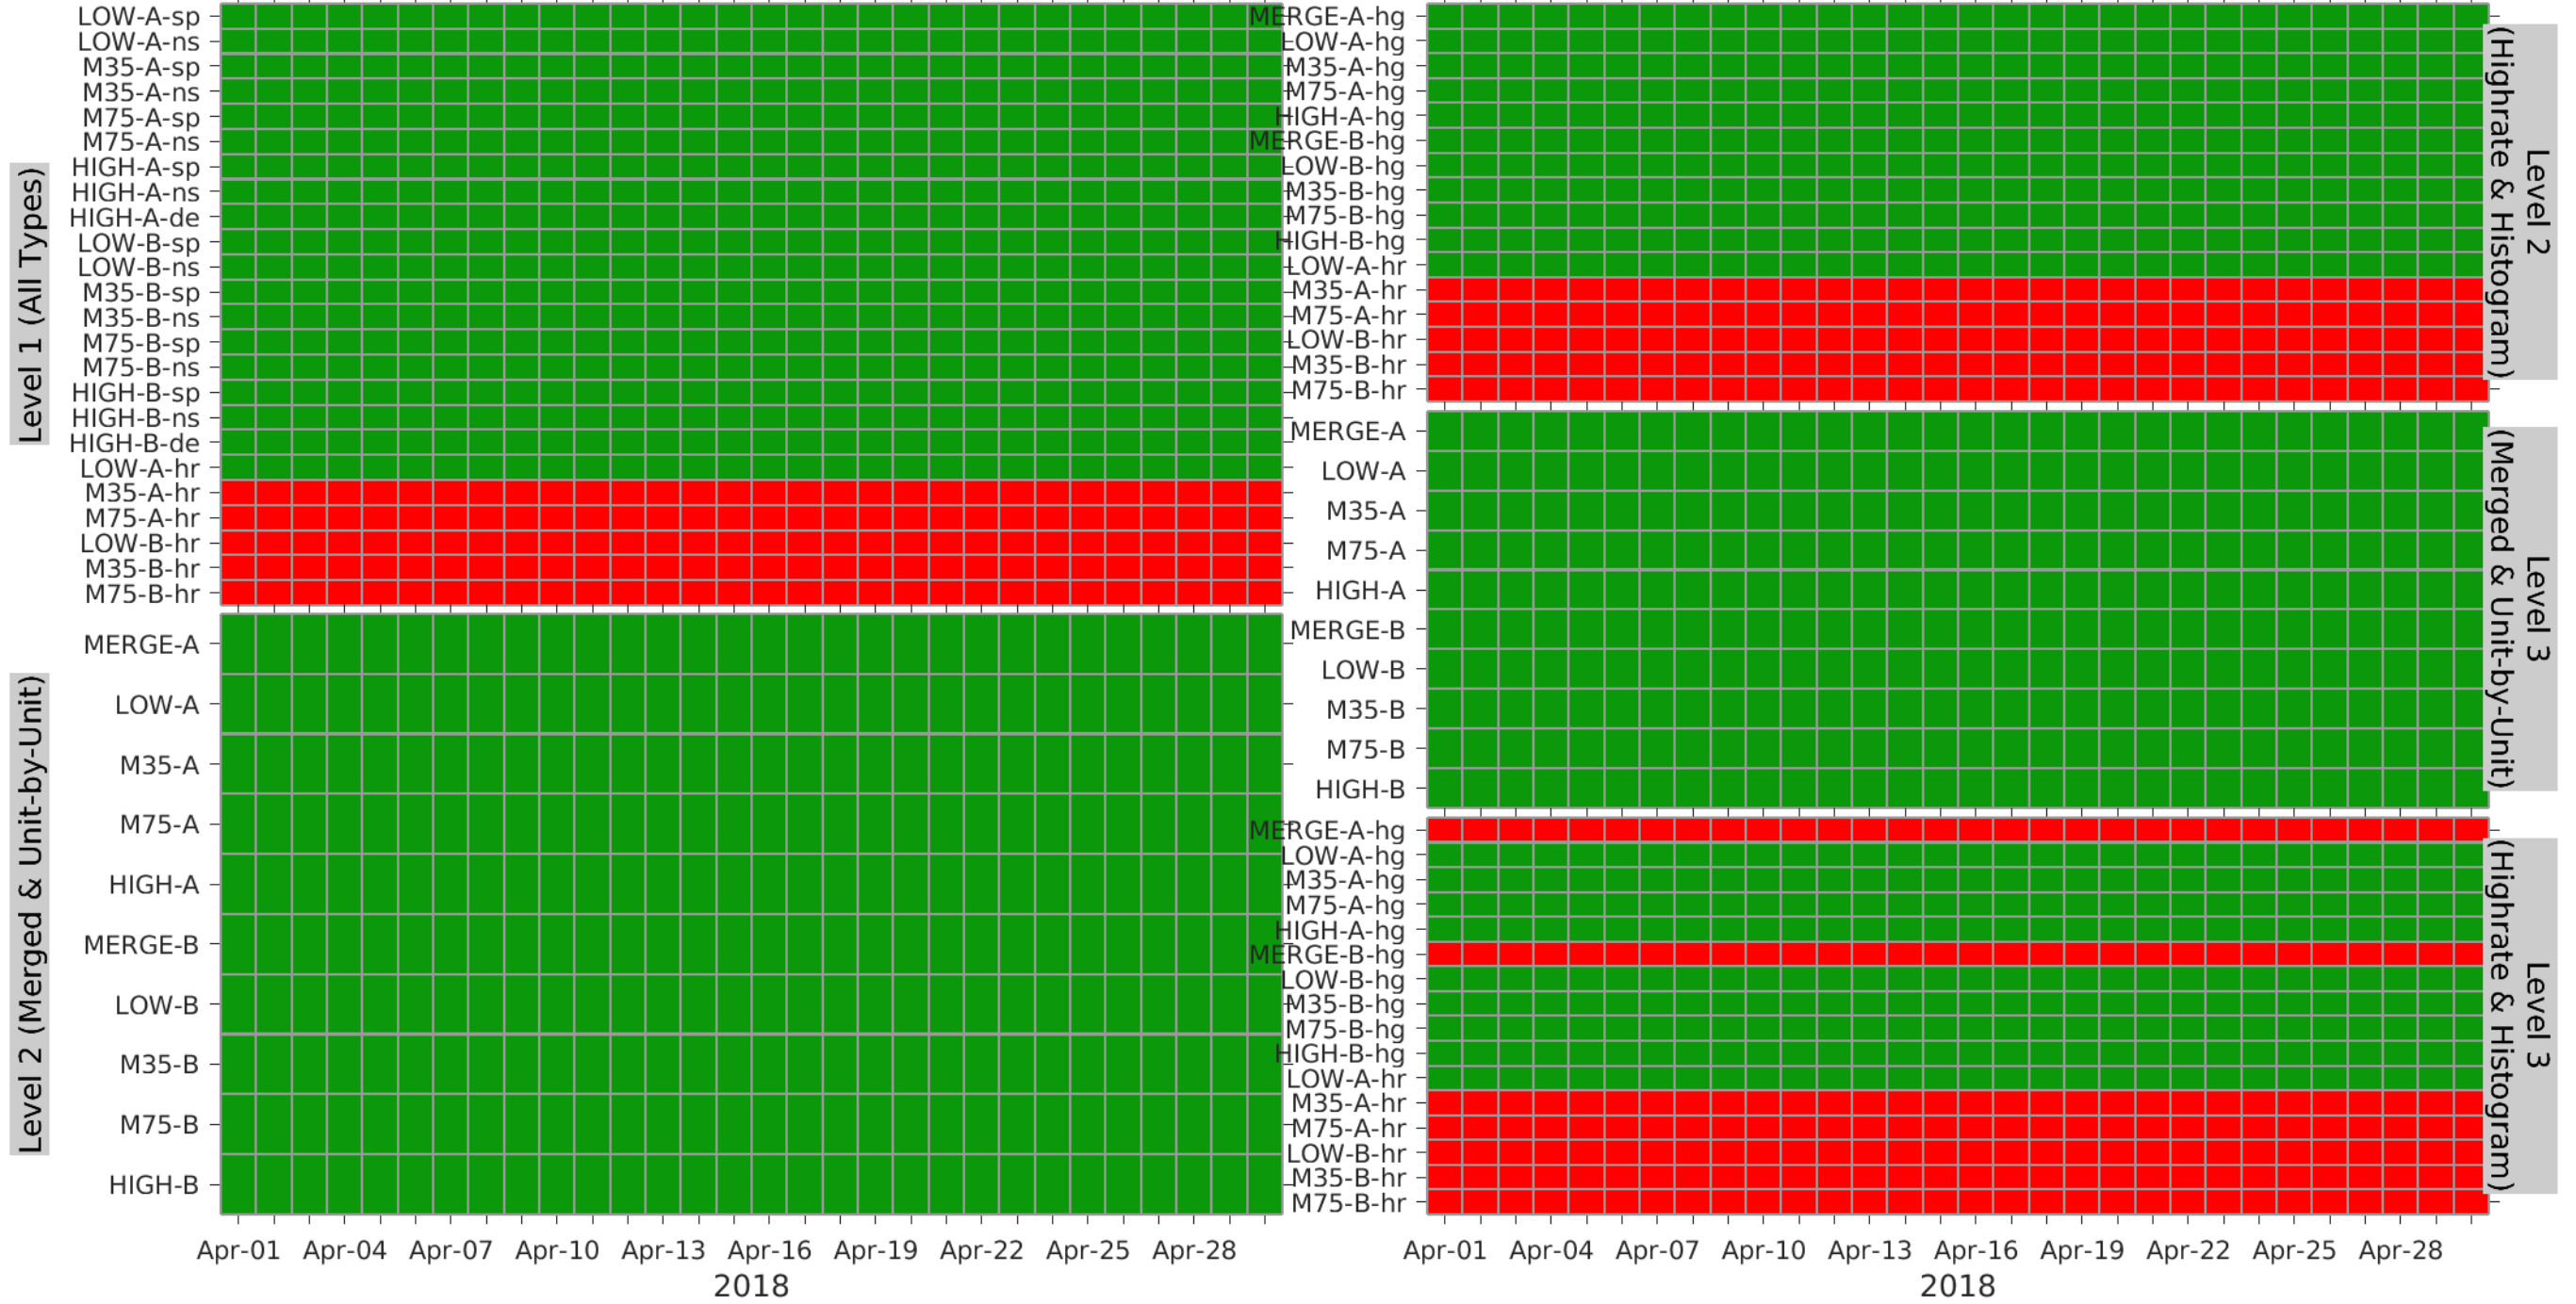

MagEIS Data Files | Created on: 2021/10/21 | Green = File Exists | Red = File Does Not Exist

sp=spin-based (science) | ns=non-science (housekeeping & status) | hr=highrate (LOW/MED only) | hg=histogram | de=direct event (HIGH only)

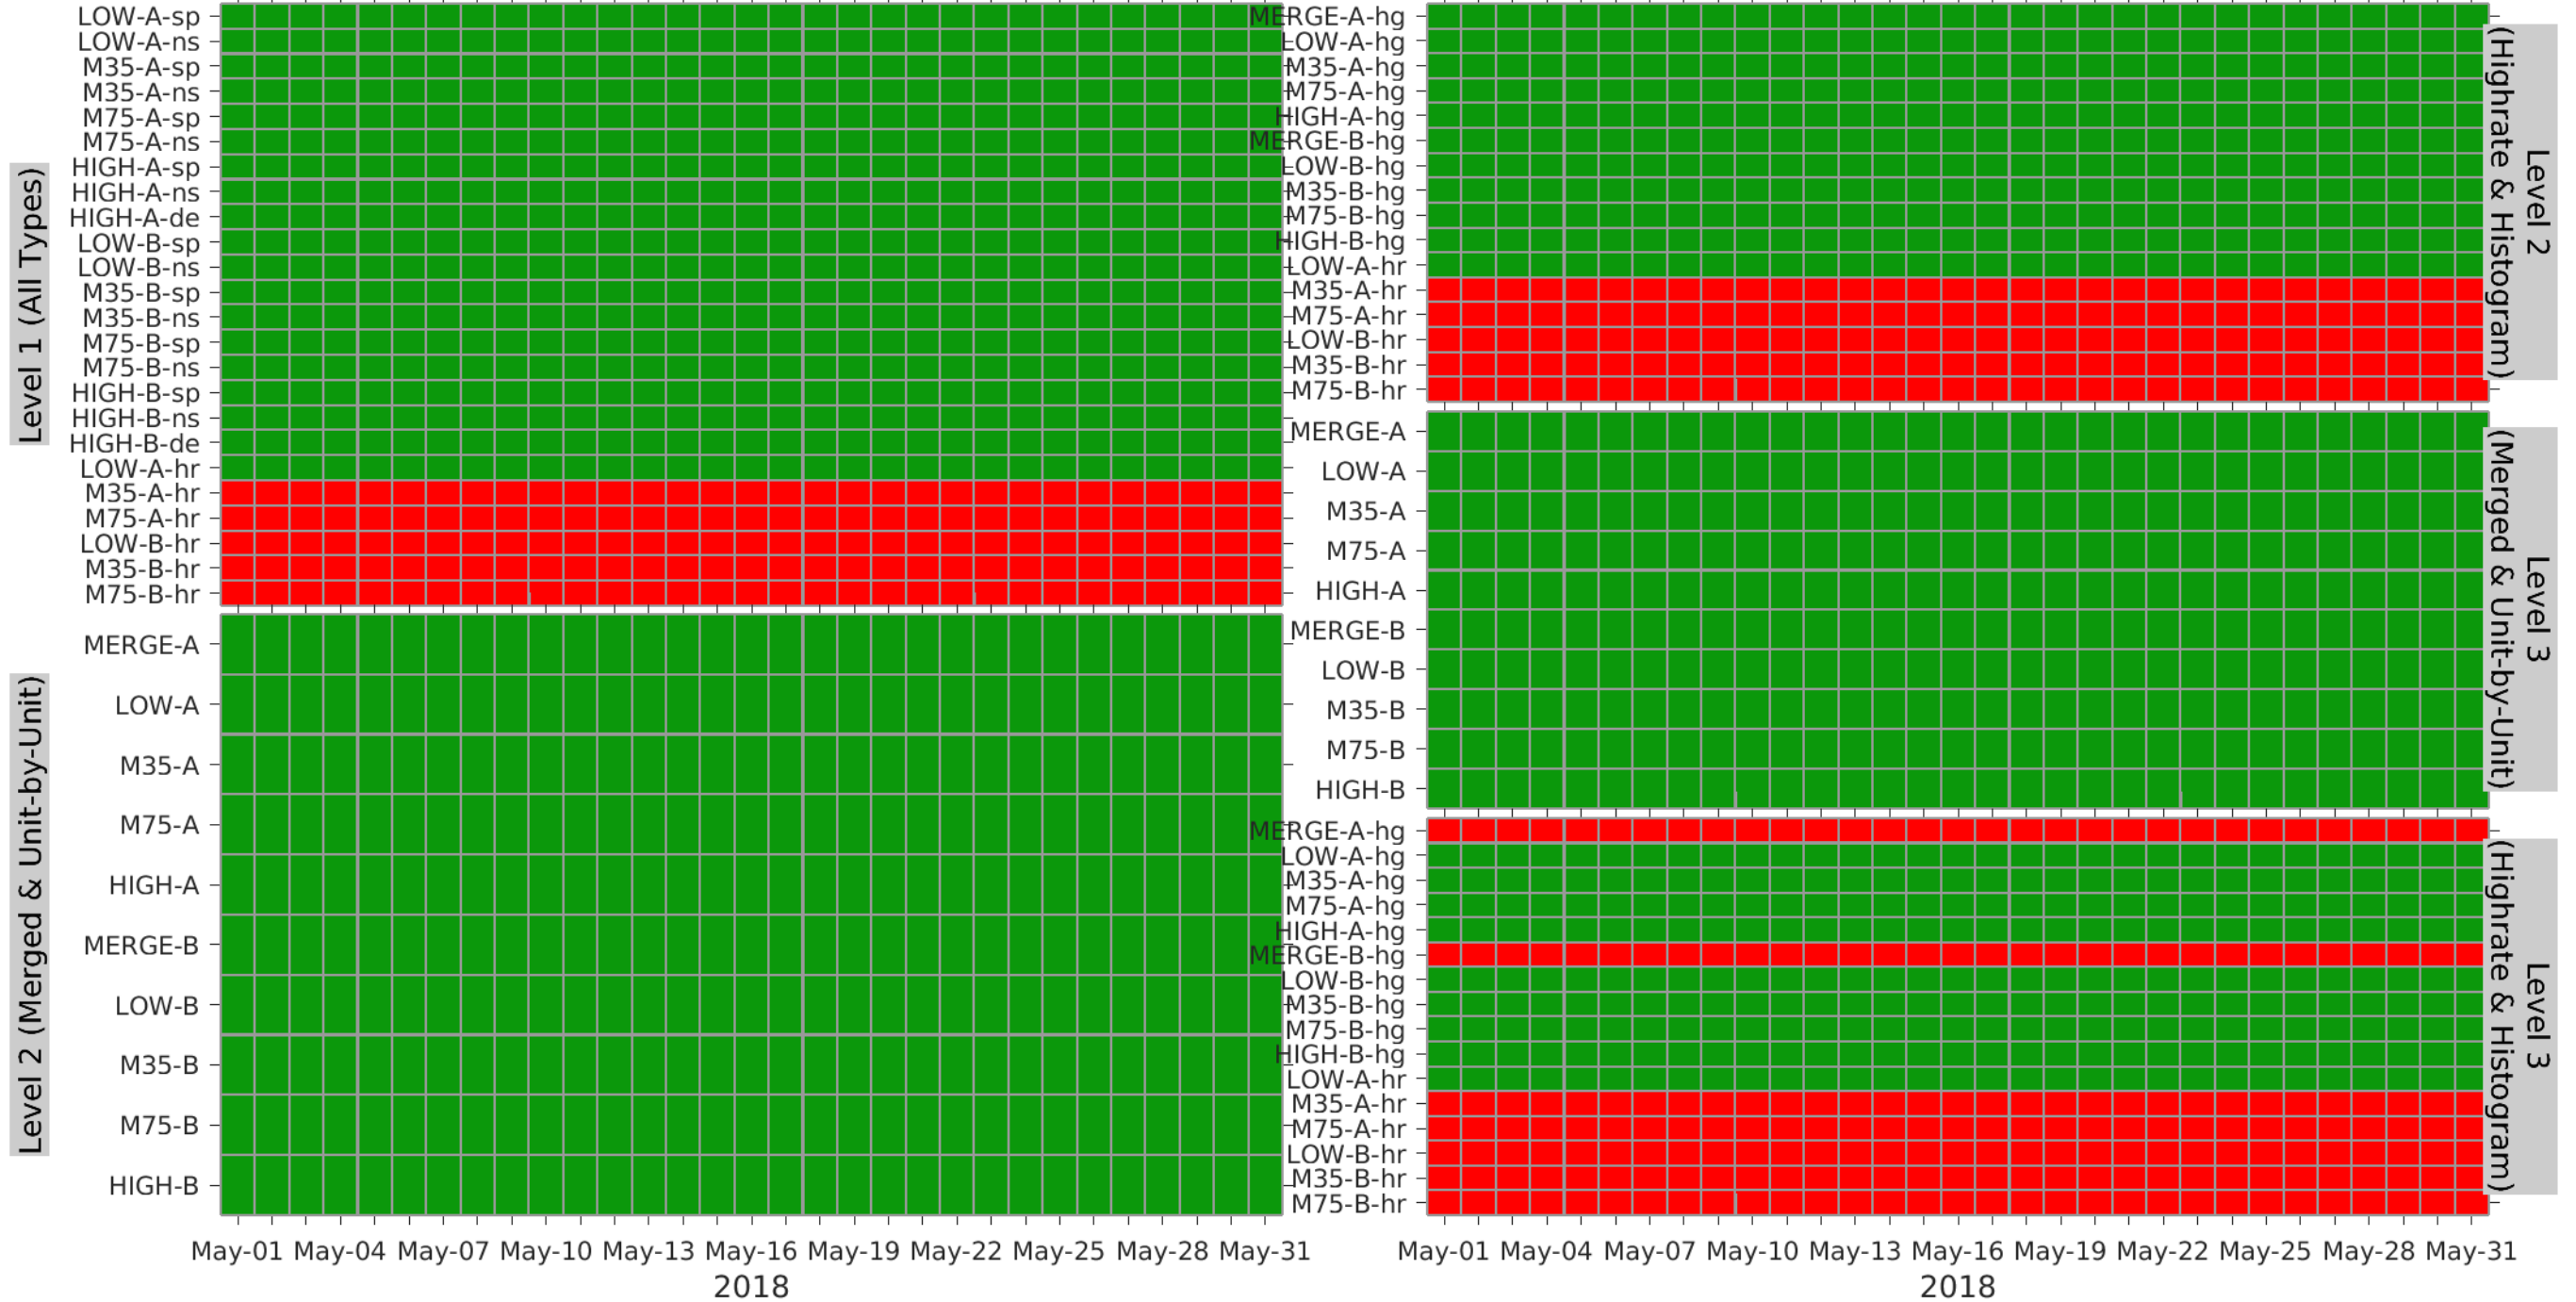

MagEIS Data Files | Created on: 2021/10/21 | Green = File Exists | Red = File Does Not Exist

sp=spin-based (science) | ns=non-science (housekeeping & status) | hr=highrate (LOW/MED only) | hg=histogram | de=direct event (HIGH only)

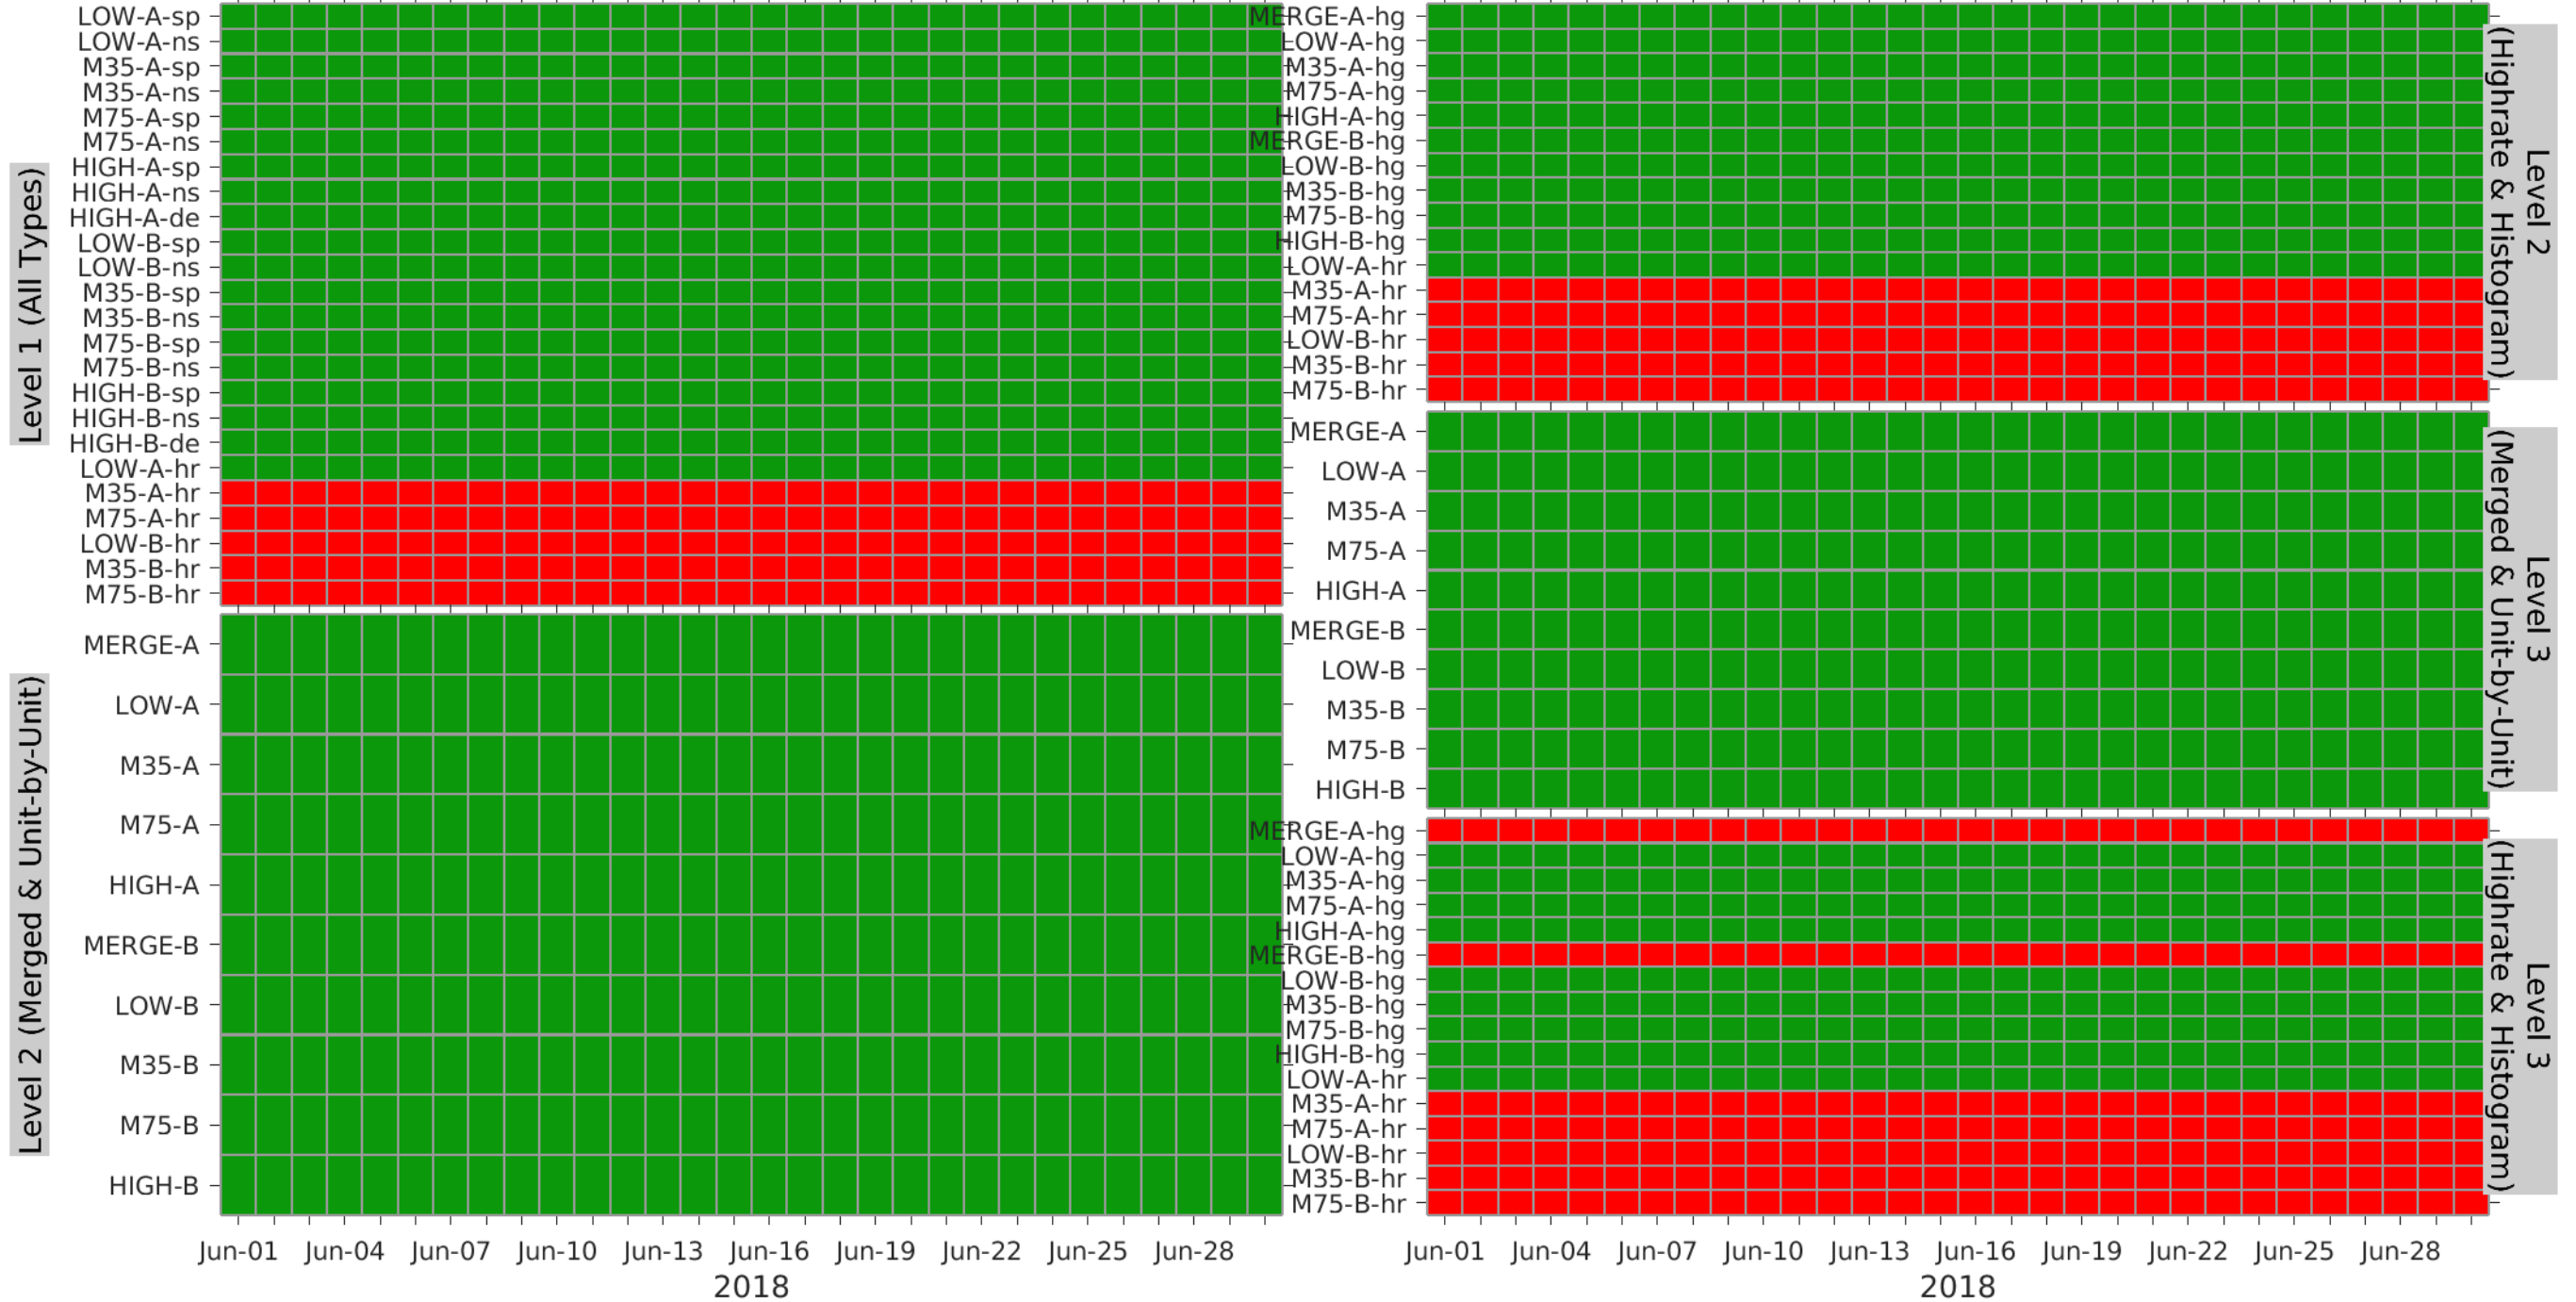

sp=spin-based (science) | ns=non-science (housekeeping & status) | hr=highrate (LOW/MED only) | hg=histogram | de=direct event (HIGH only)

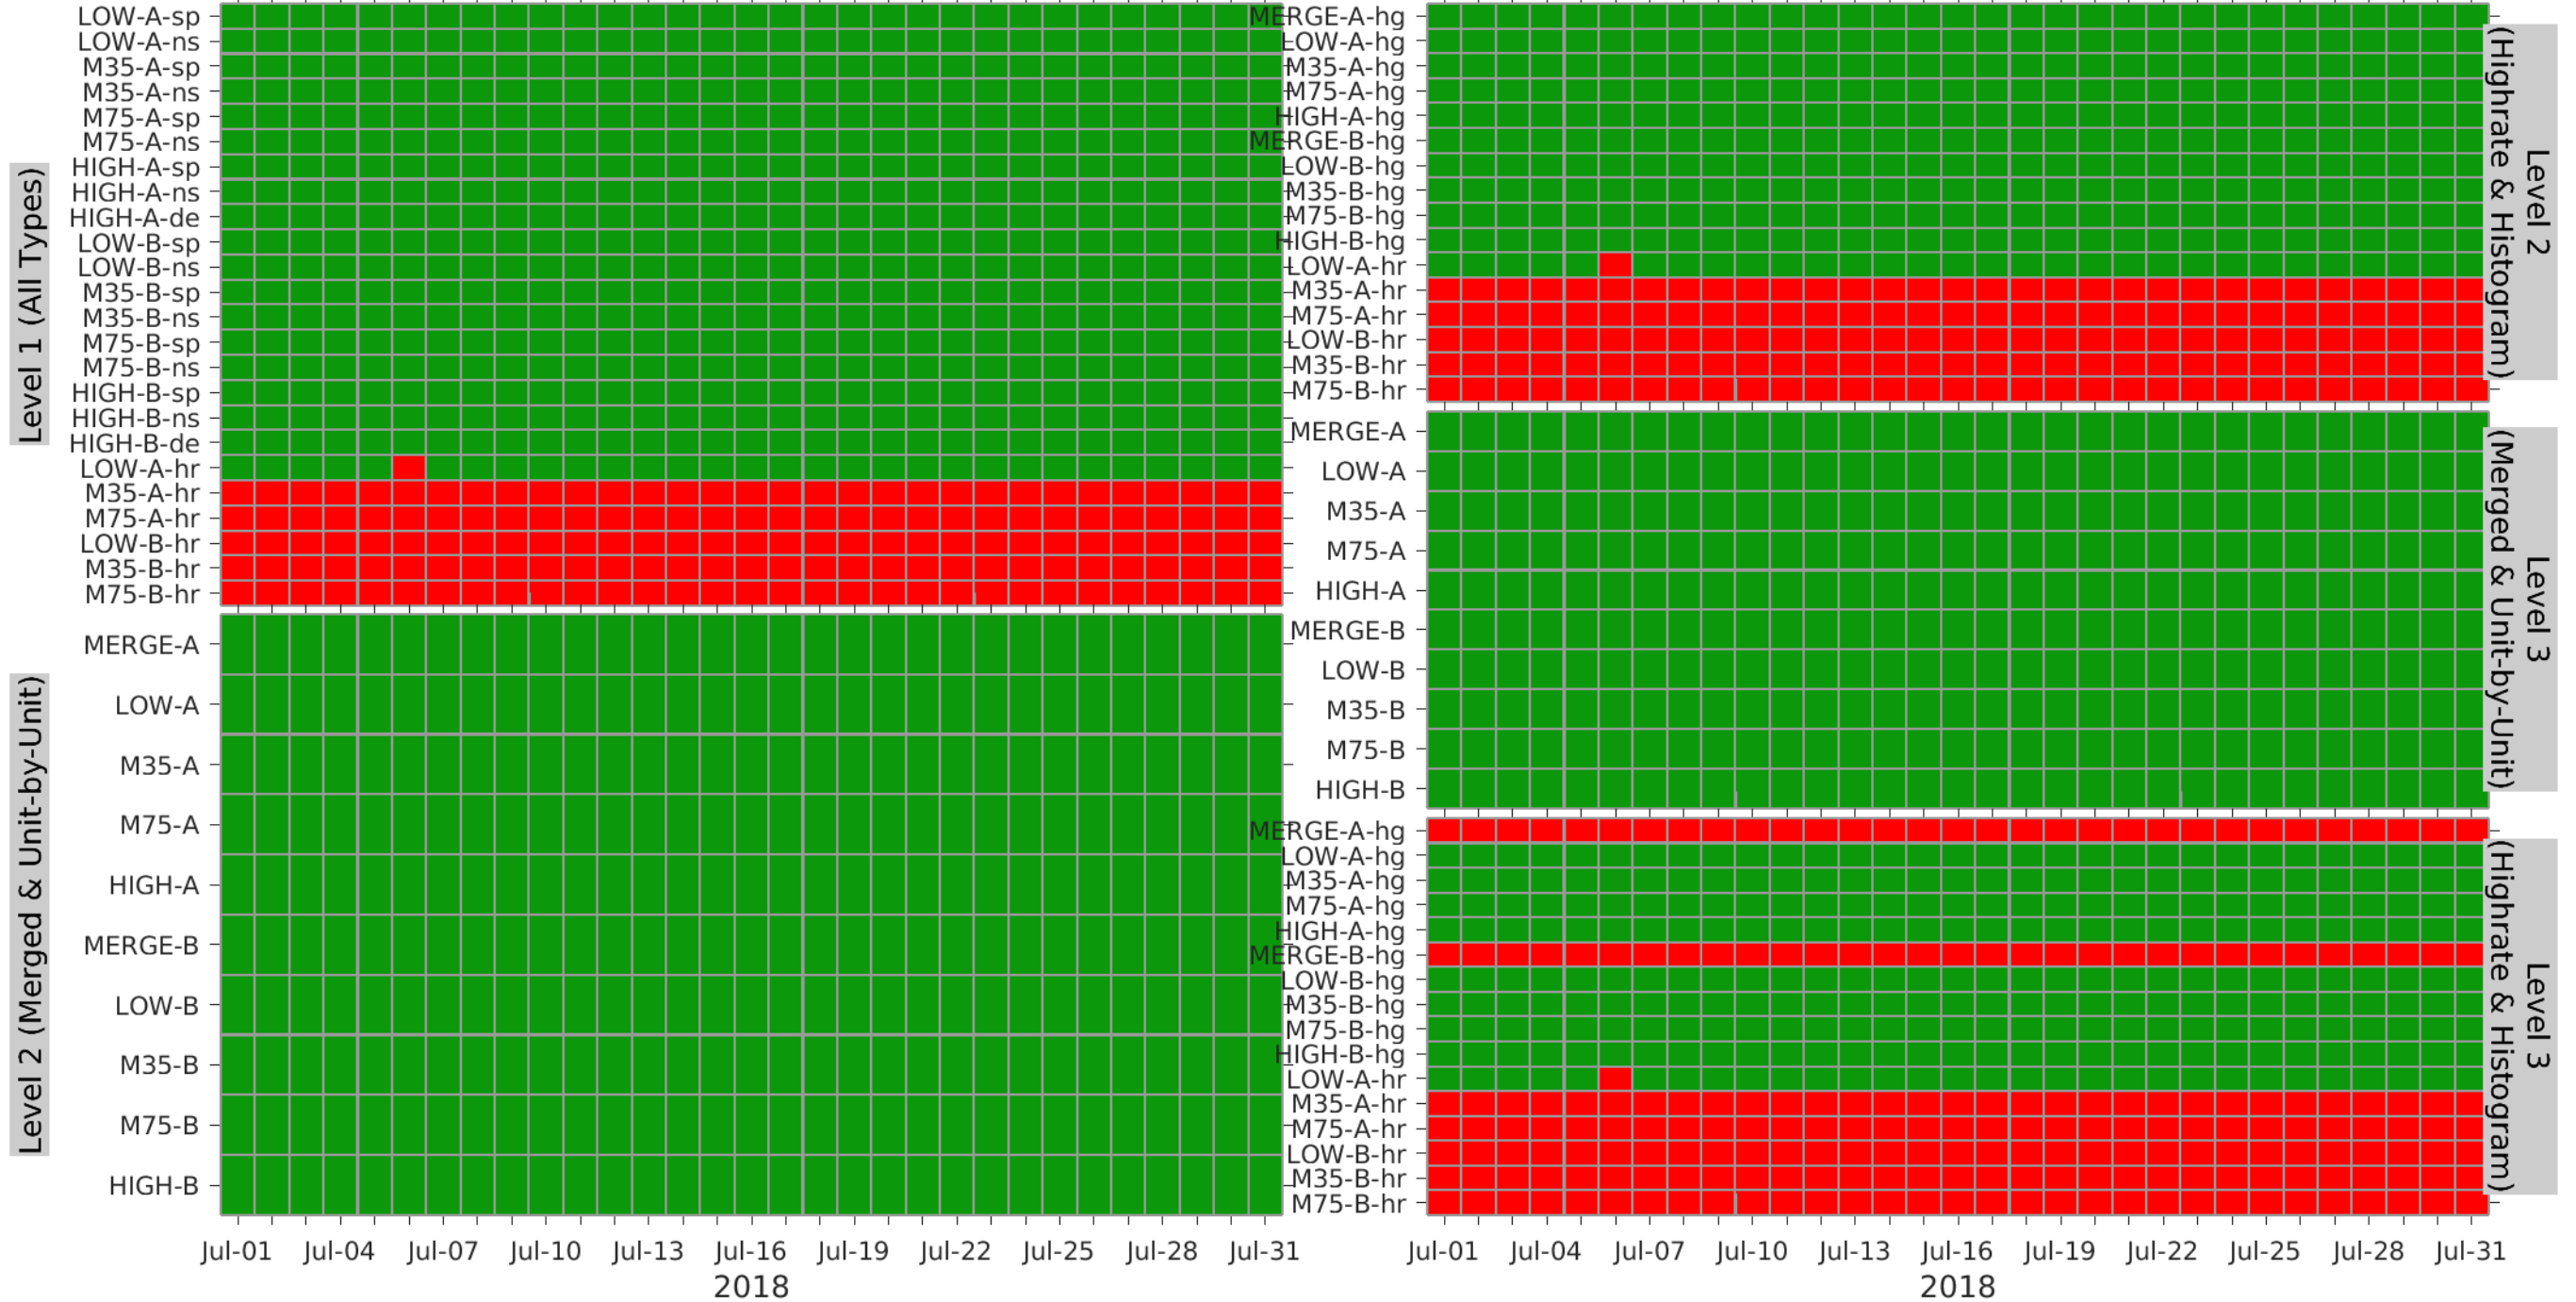



MagEIS Data Files | Created on: 2021/10/21 | Green = File Exists | Red = File Does Not Exist

sp=spin-based (science) | ns=non-science (housekeeping & status) | hr=highrate (LOW/MED only) | hg=histogram | de=direct event (HIGH only)

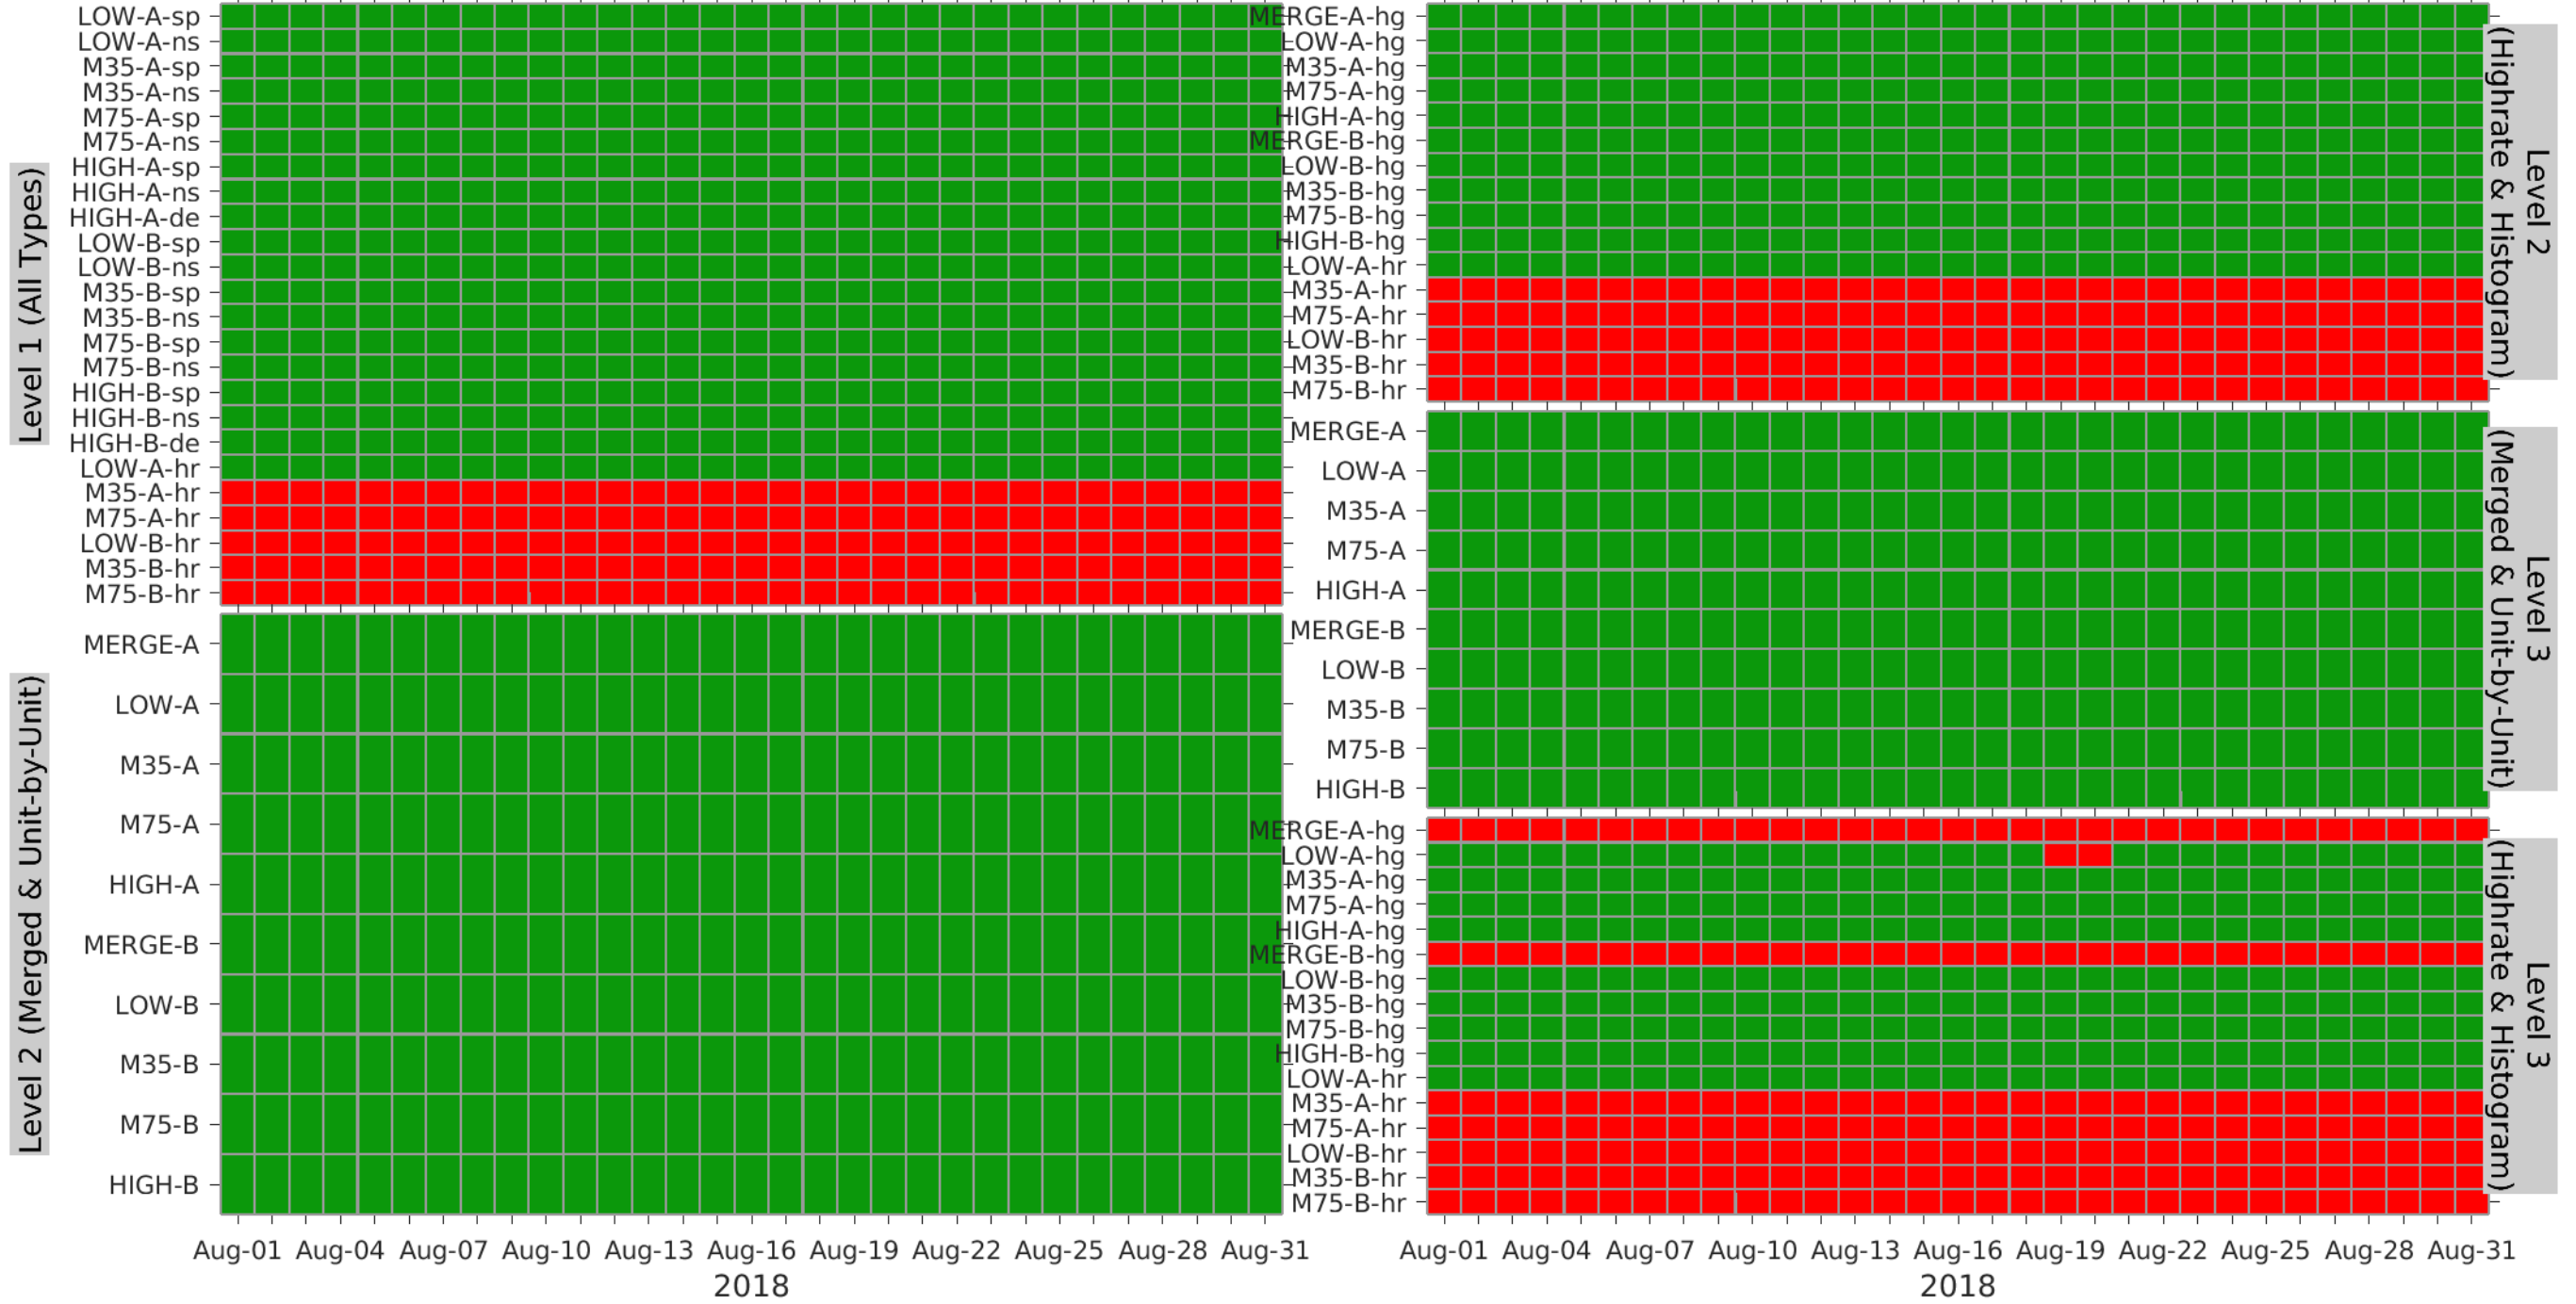

MagEIS Data Files | Created on: 2021/10/21 | Green = File Exists | Red = File Does Not Exist

sp=spin-based (science) | ns=non-science (housekeeping & status) | hr=highrate (LOW/MED only) | hg=histogram | de=direct event (HIGH only)

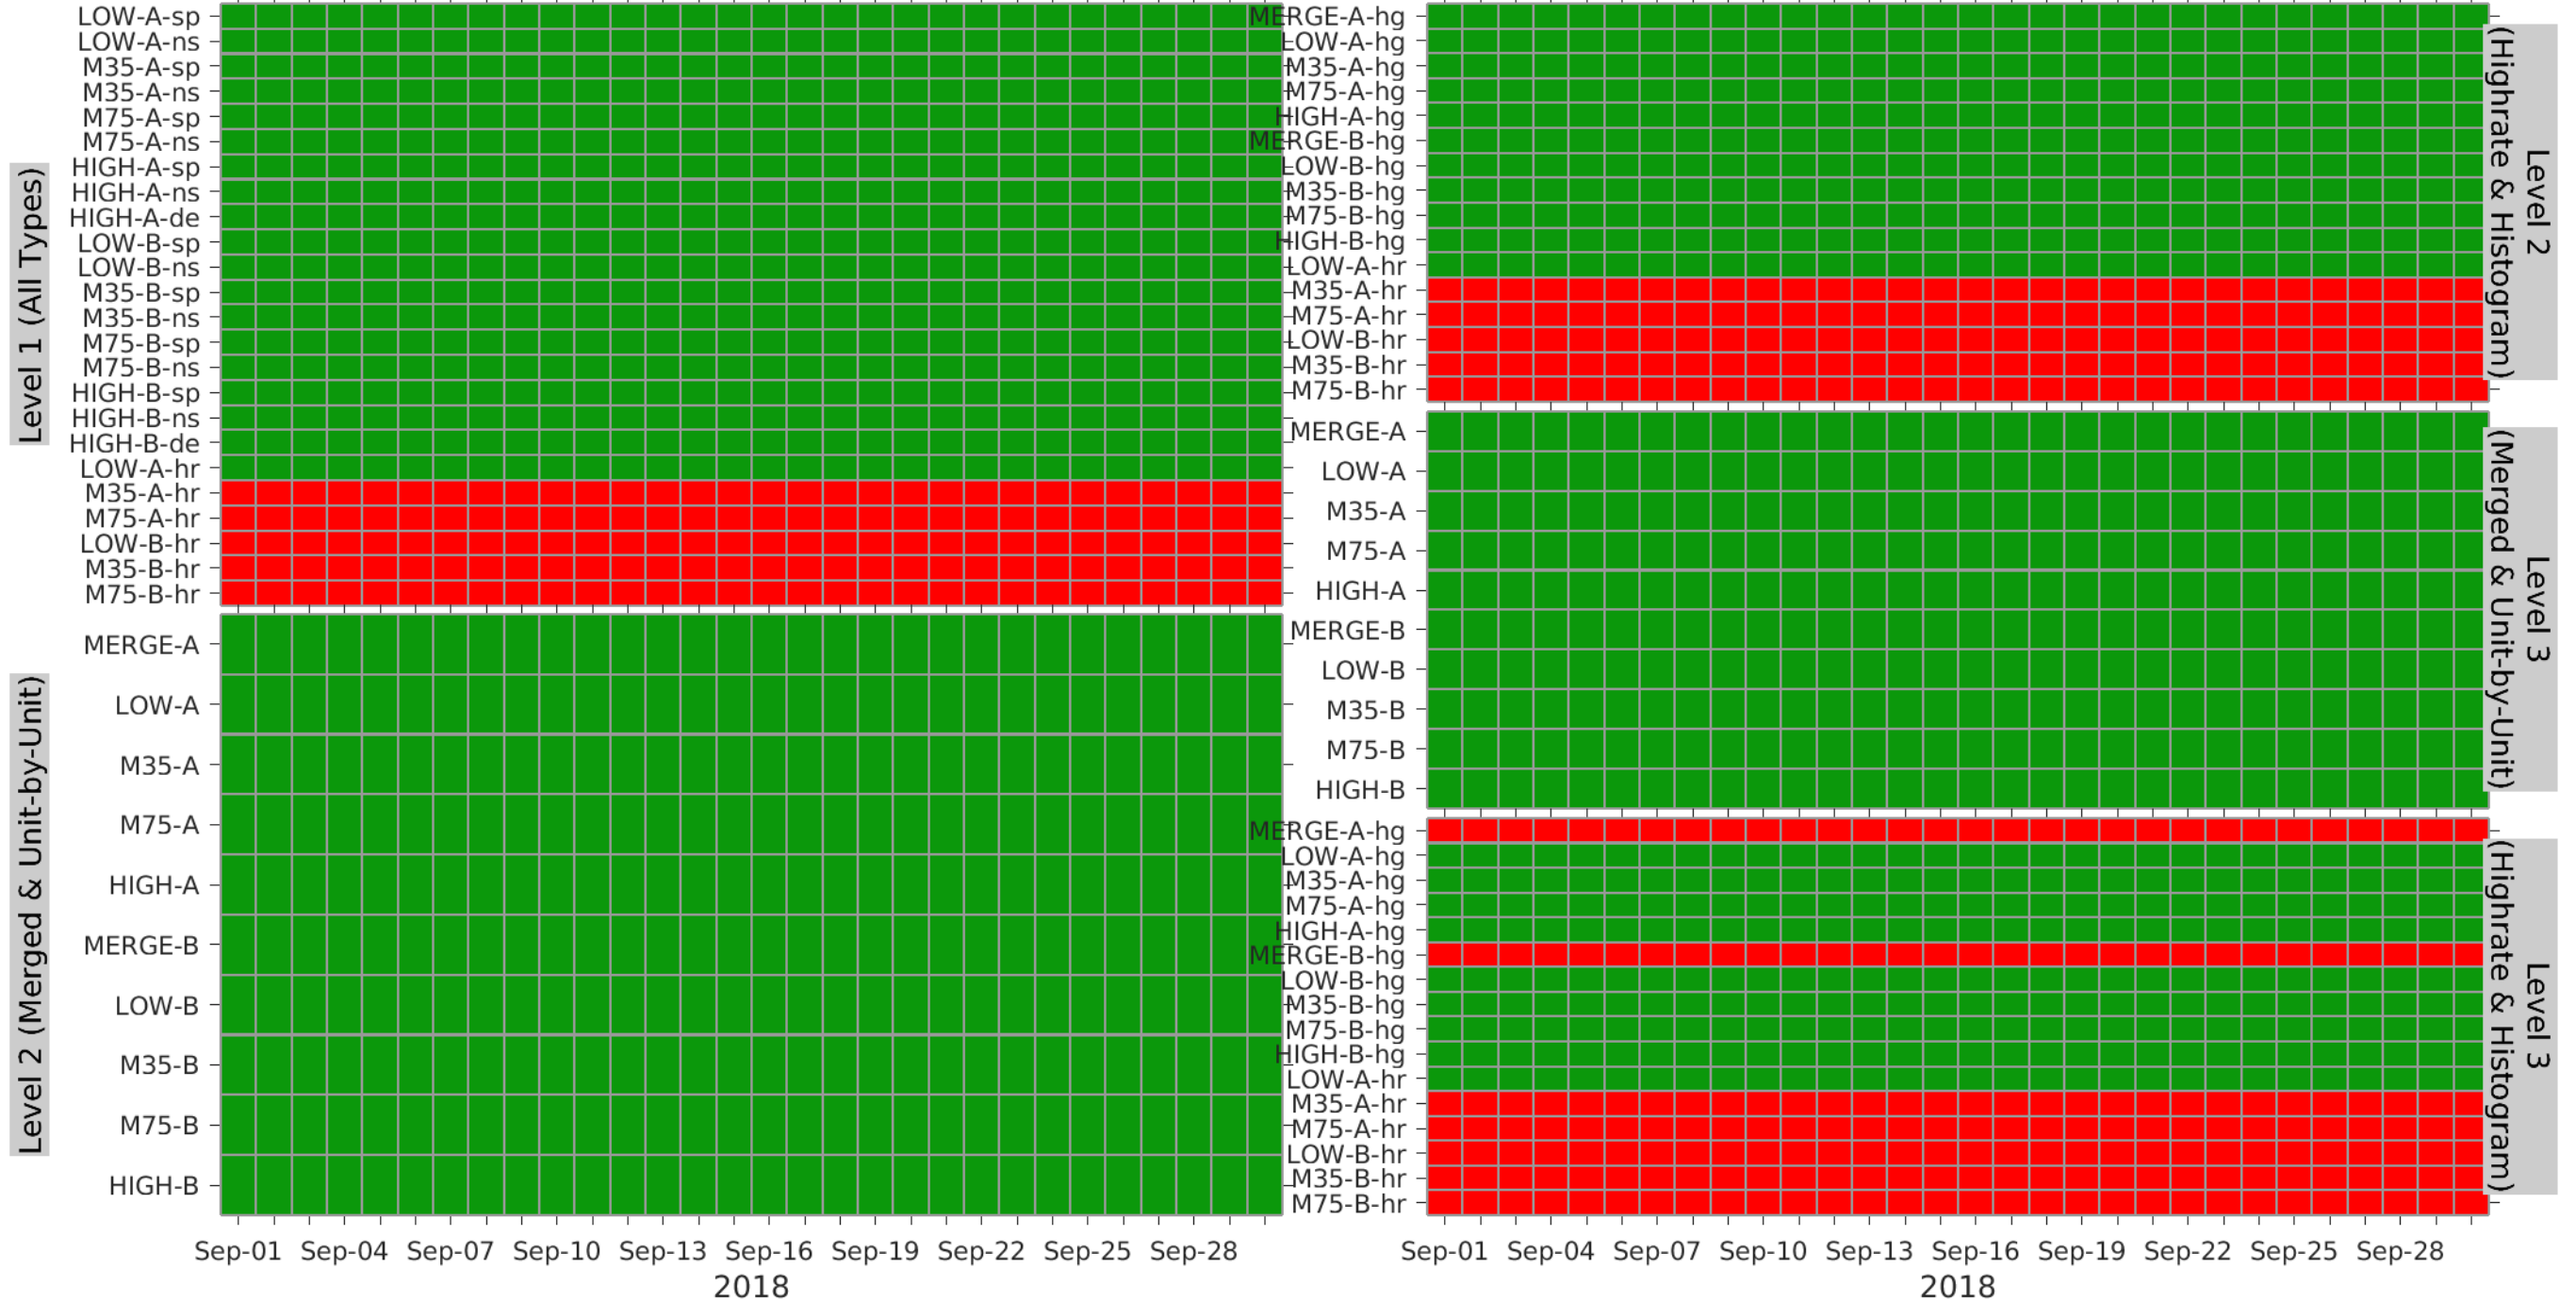

MagEIS Data Files | Created on: 2021/10/21 | Green = File Exists | Red = File Does Not Exist

sp=spin-based (science) | ns=non-science (housekeeping & status) | hr=highrate (LOW/MED only) | hg=histogram | de=direct event (HIGH only)

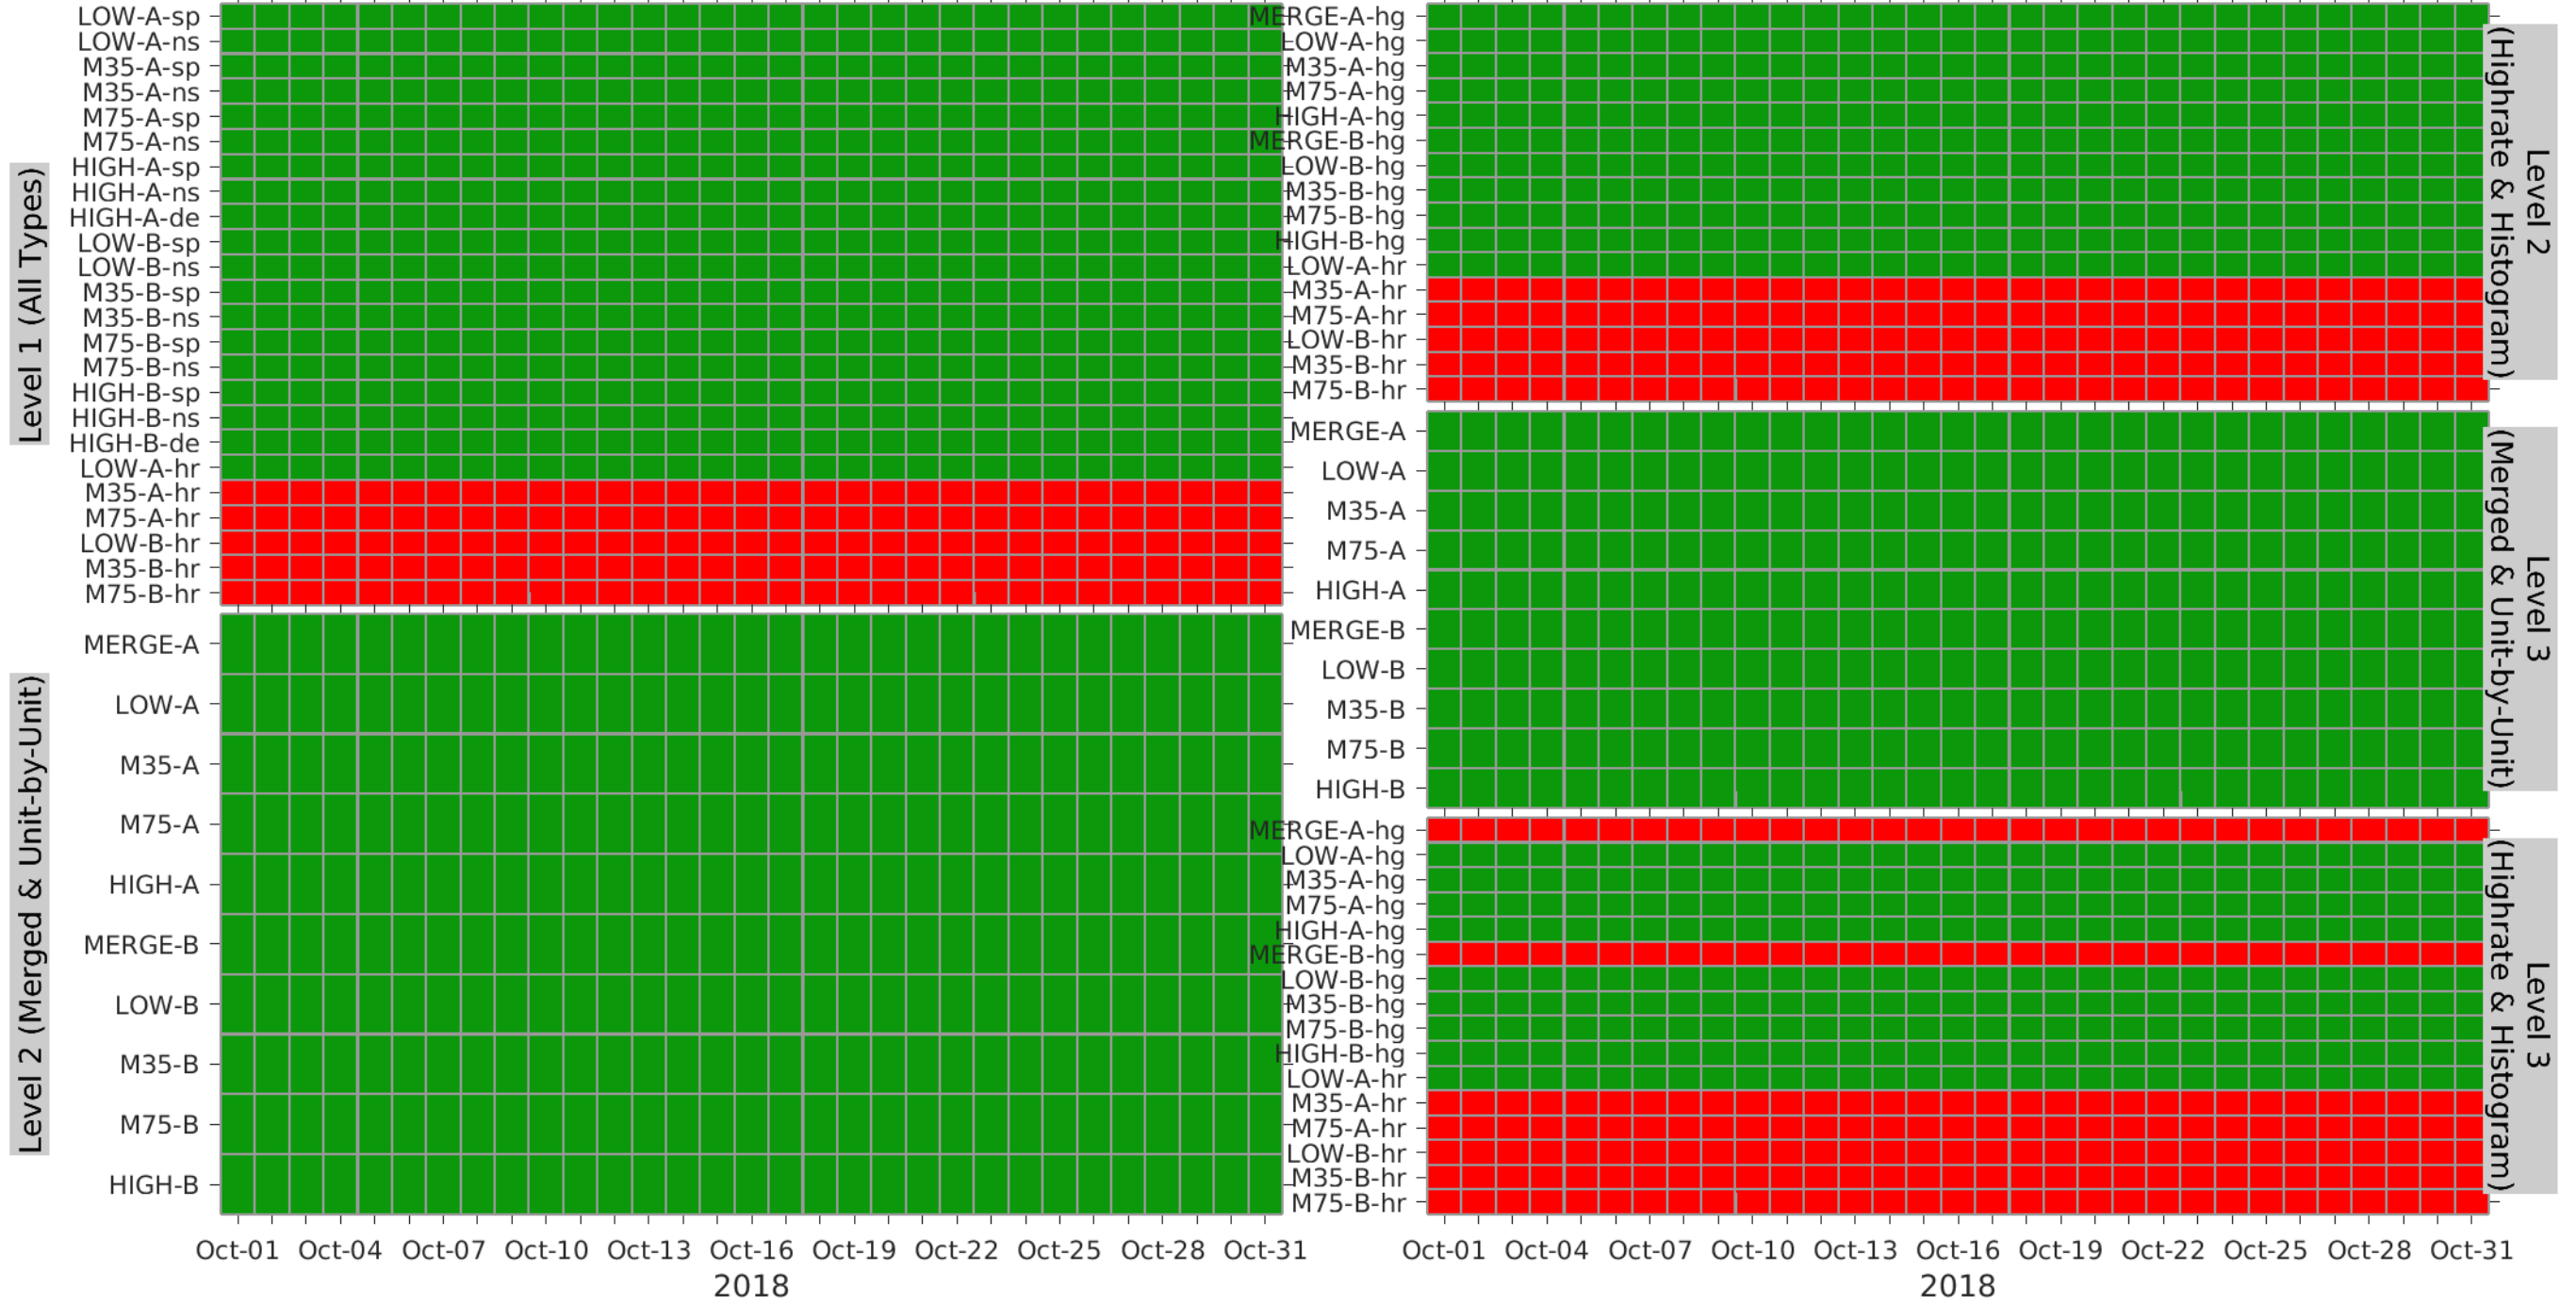

MagEIS Data Files | Created on: 2021/10/21 | Green = File Exists | Red = File Does Not Exist

sp=spin-based (science) | ns=non-science (housekeeping & status) | hr=highrate (LOW/MED only) | hg=histogram | de=direct event (HIGH only)

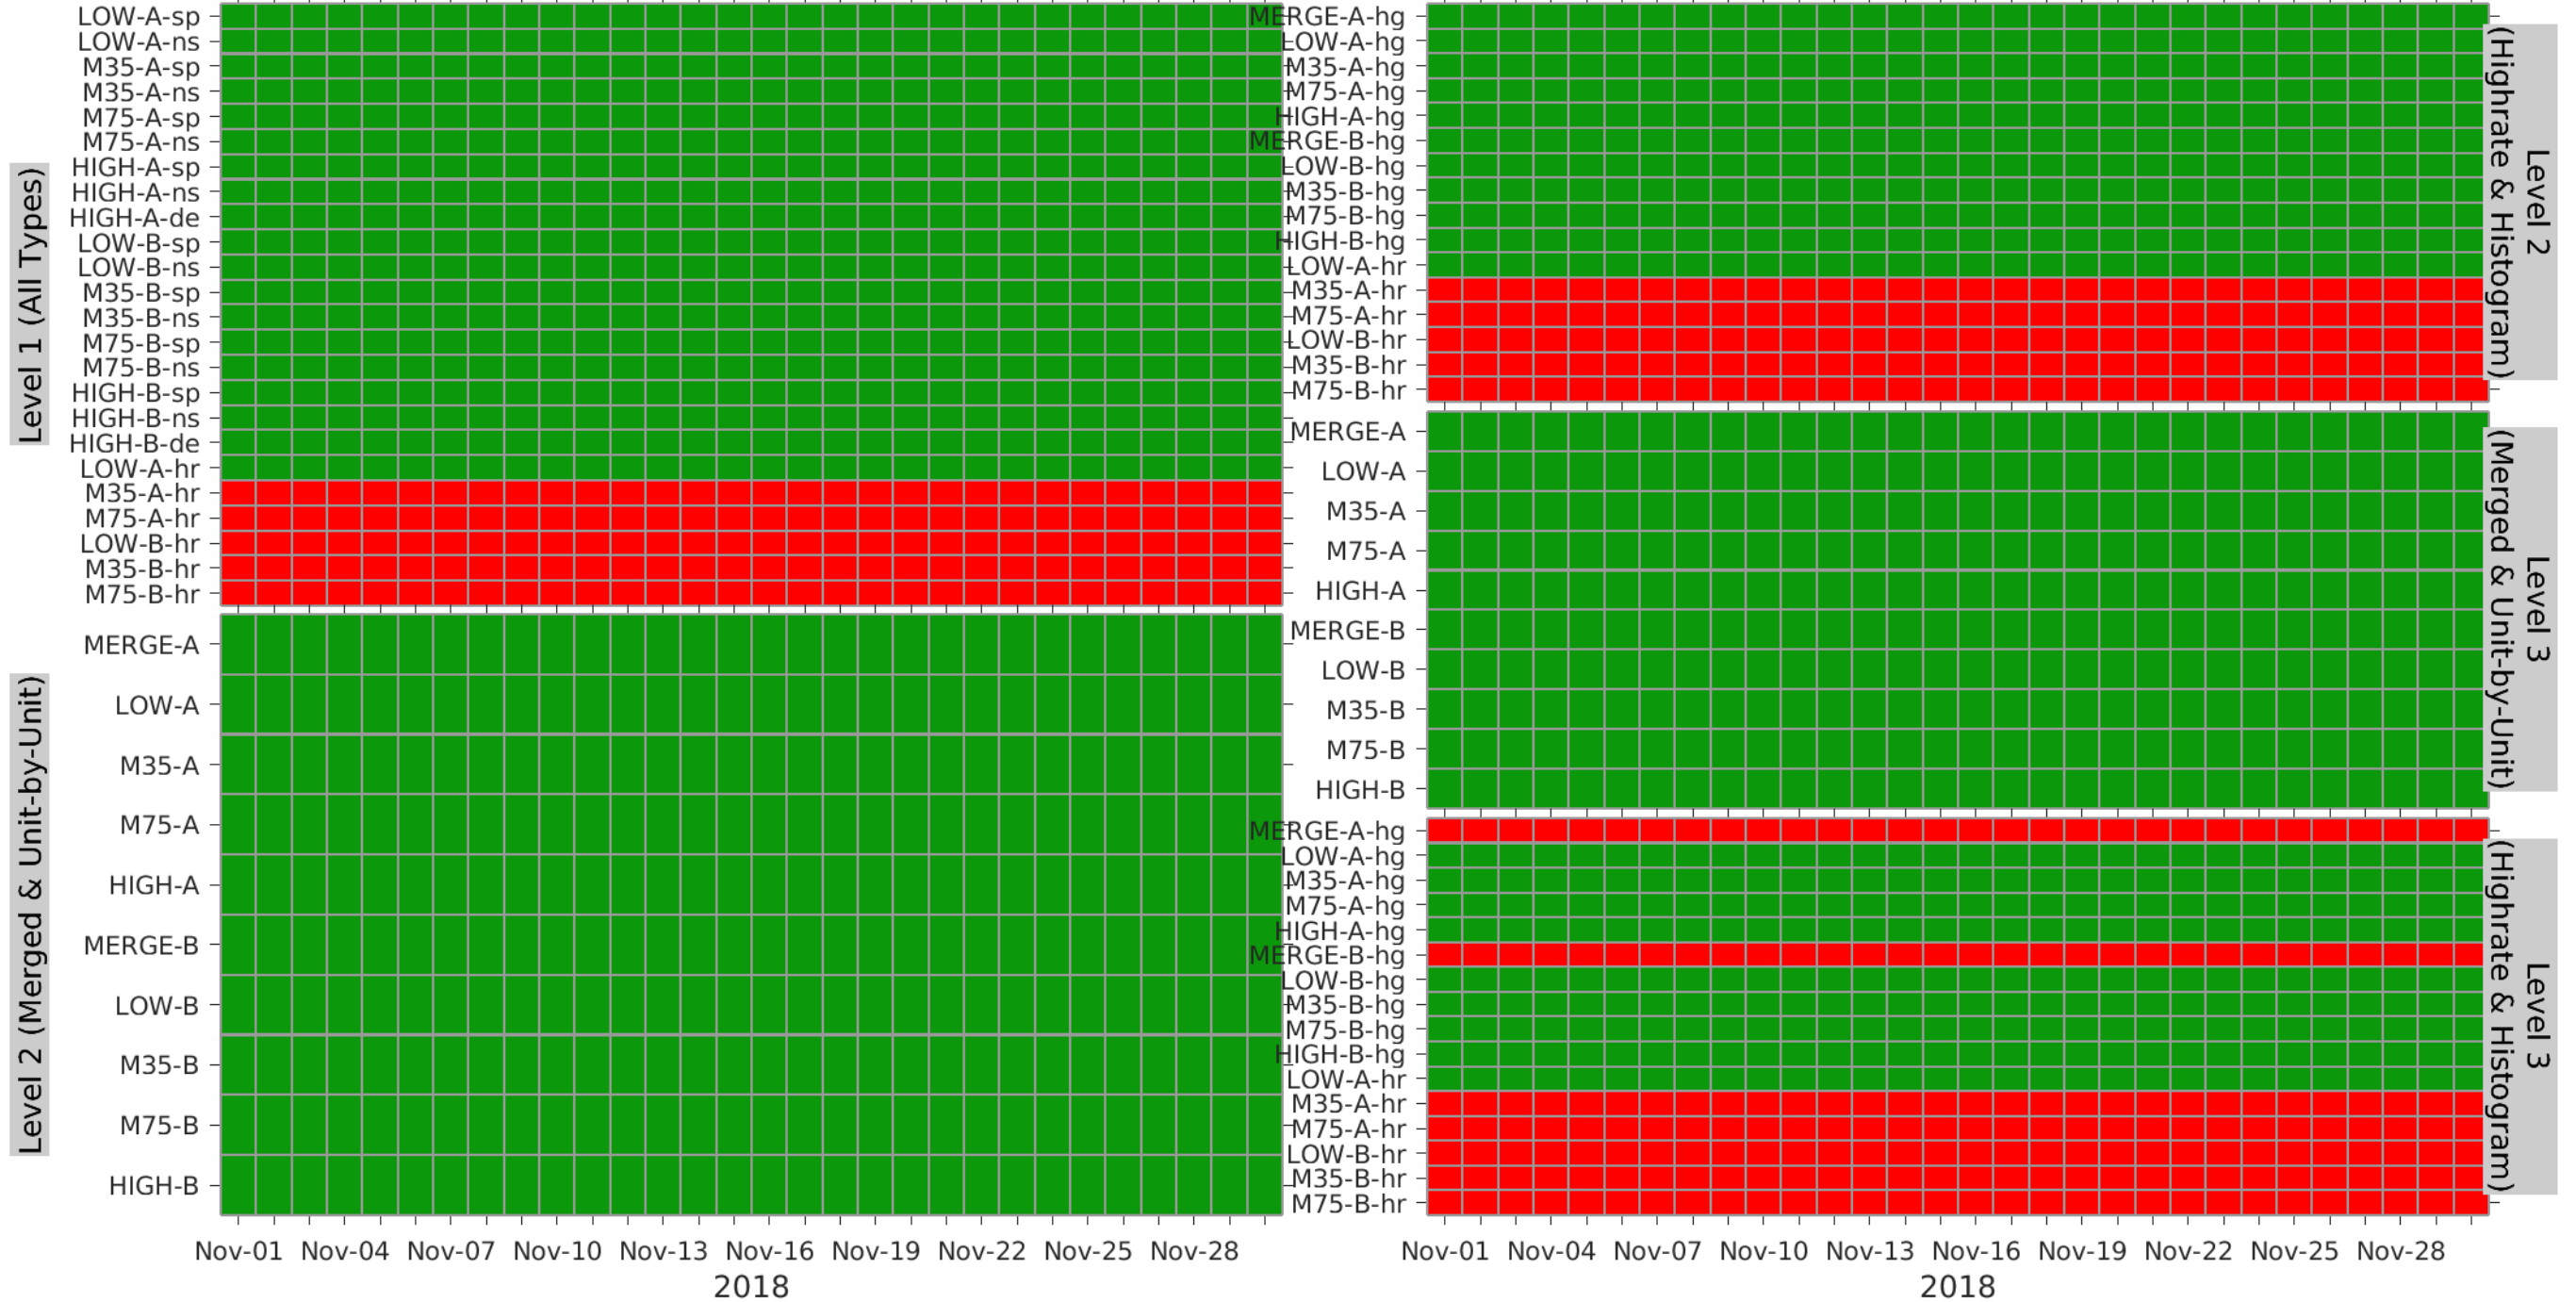

MagEIS Data Files | Created on: 2021/10/21 | Green = File Exists | Red = File Does Not Exist

sp=spin-based (science) | ns=non-science (housekeeping & status) | hr=highrate (LOW/MED only) | hg=histogram | de=direct event (HIGH only)

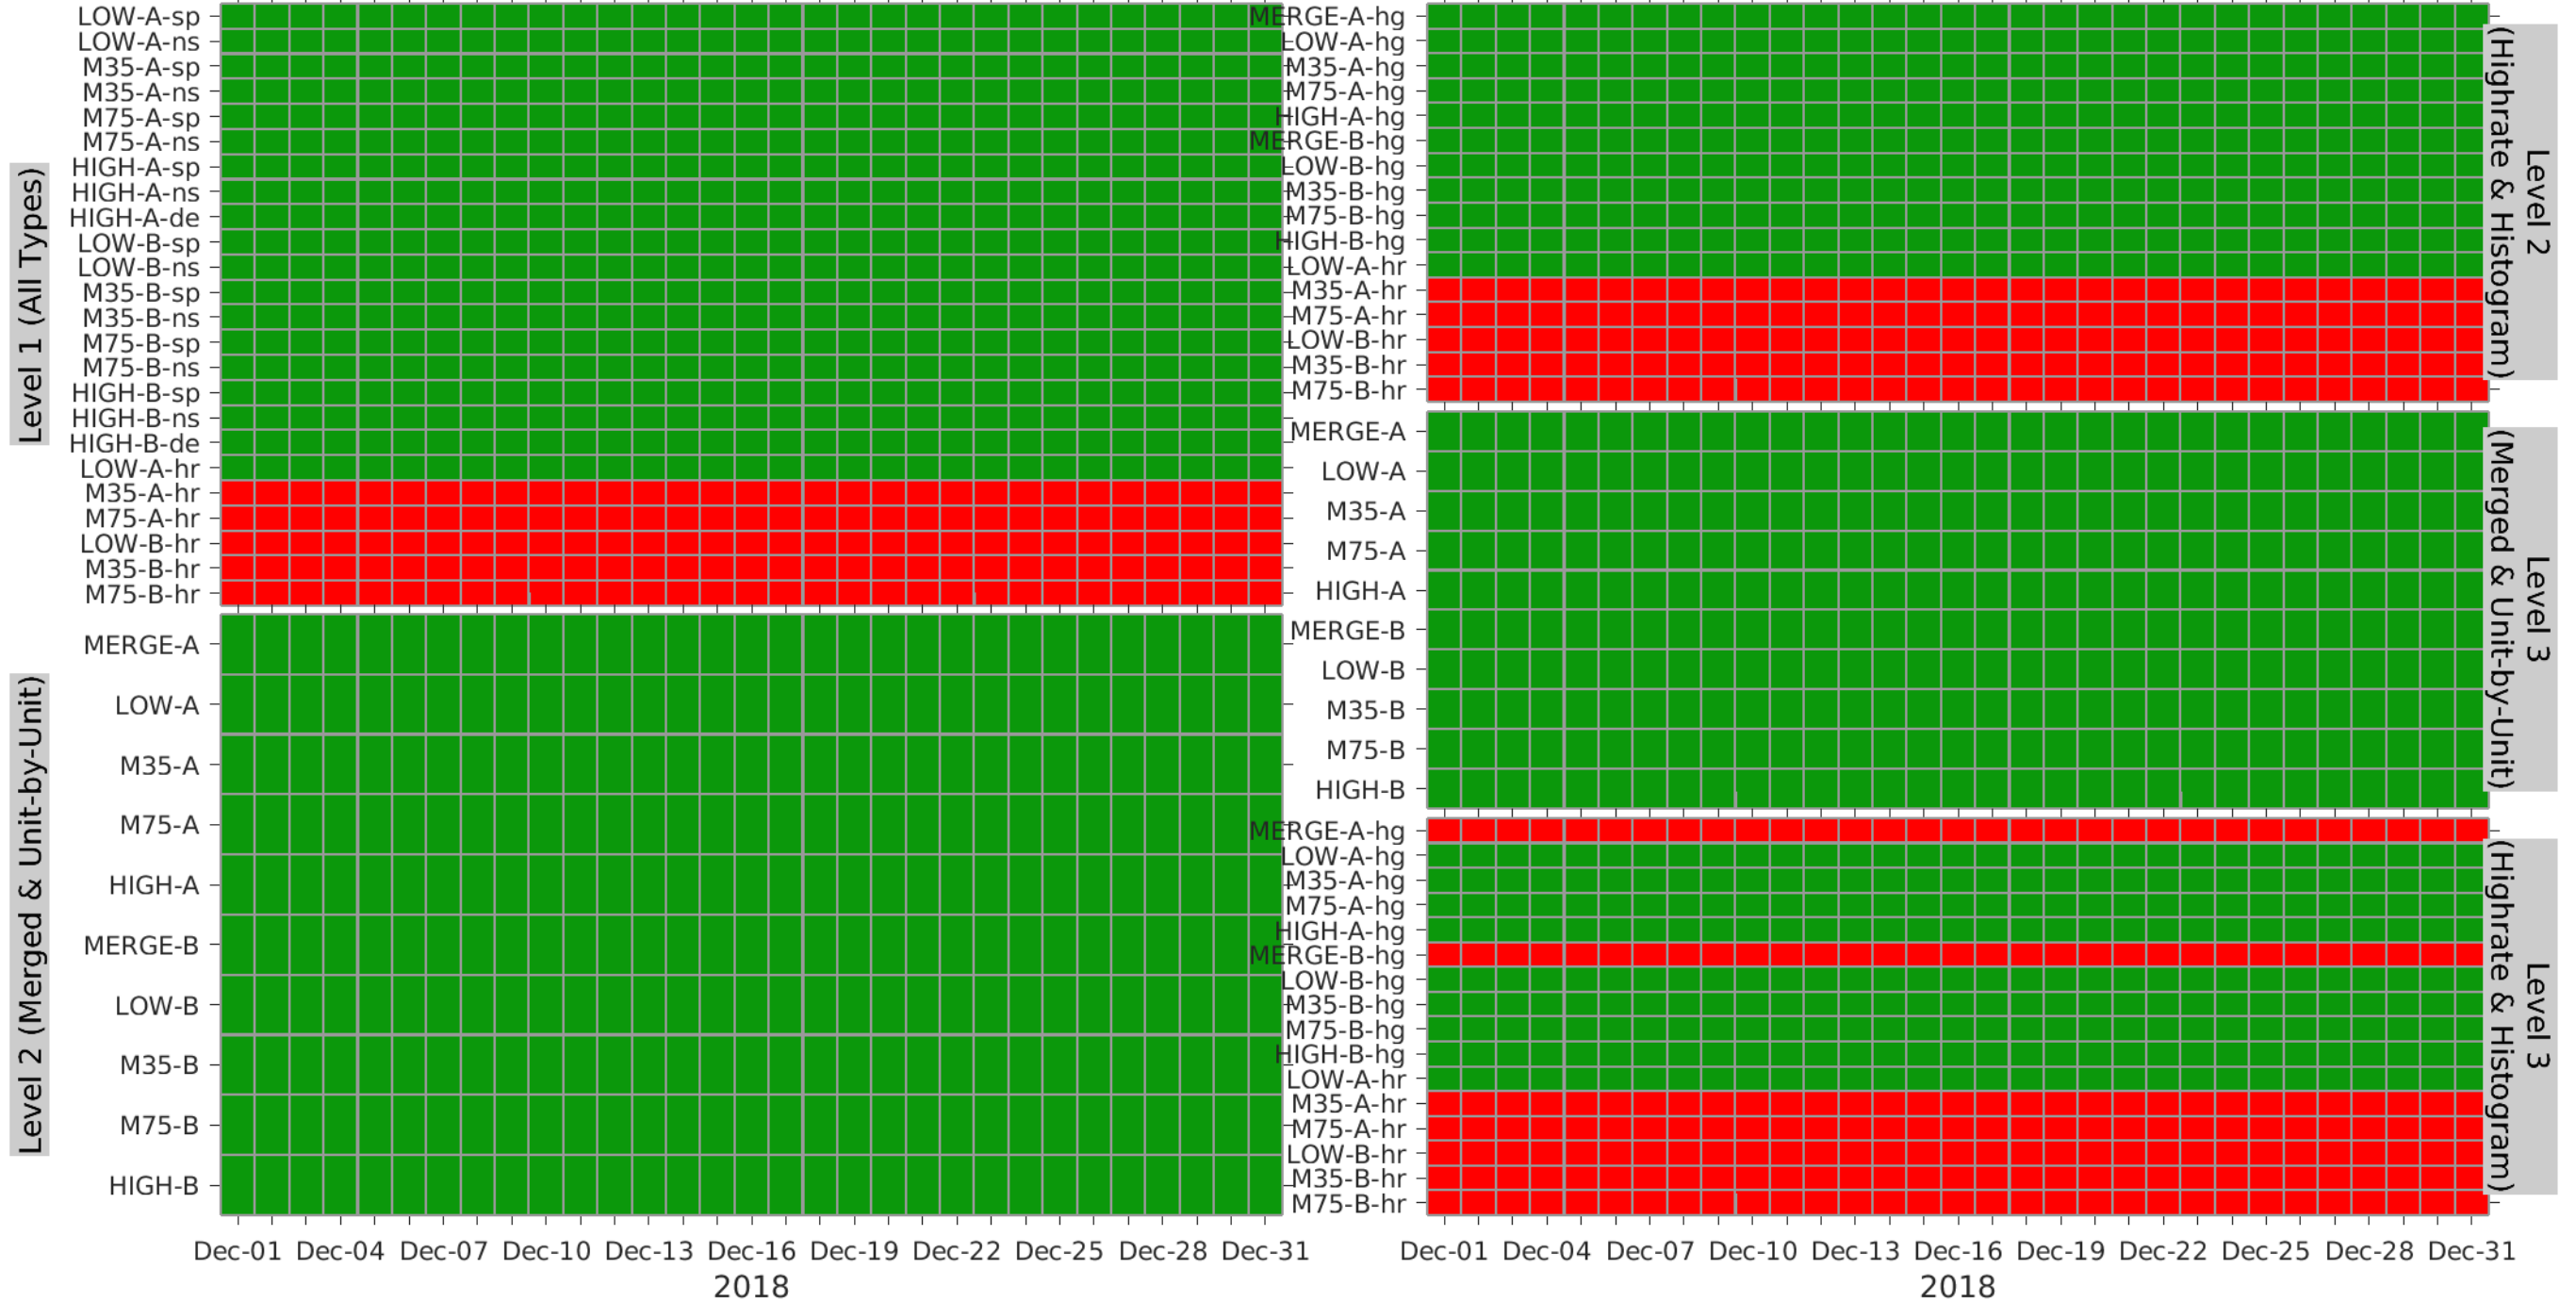

MagEIS Data Files | Created on: 2021/10/21 | Green = File Exists | Red = File Does Not Exist

sp=spin-based (science) | ns=non-science (housekeeping & status) | hr=highrate (LOW/MED only) | hg=histogram | de=direct event (HIGH only)

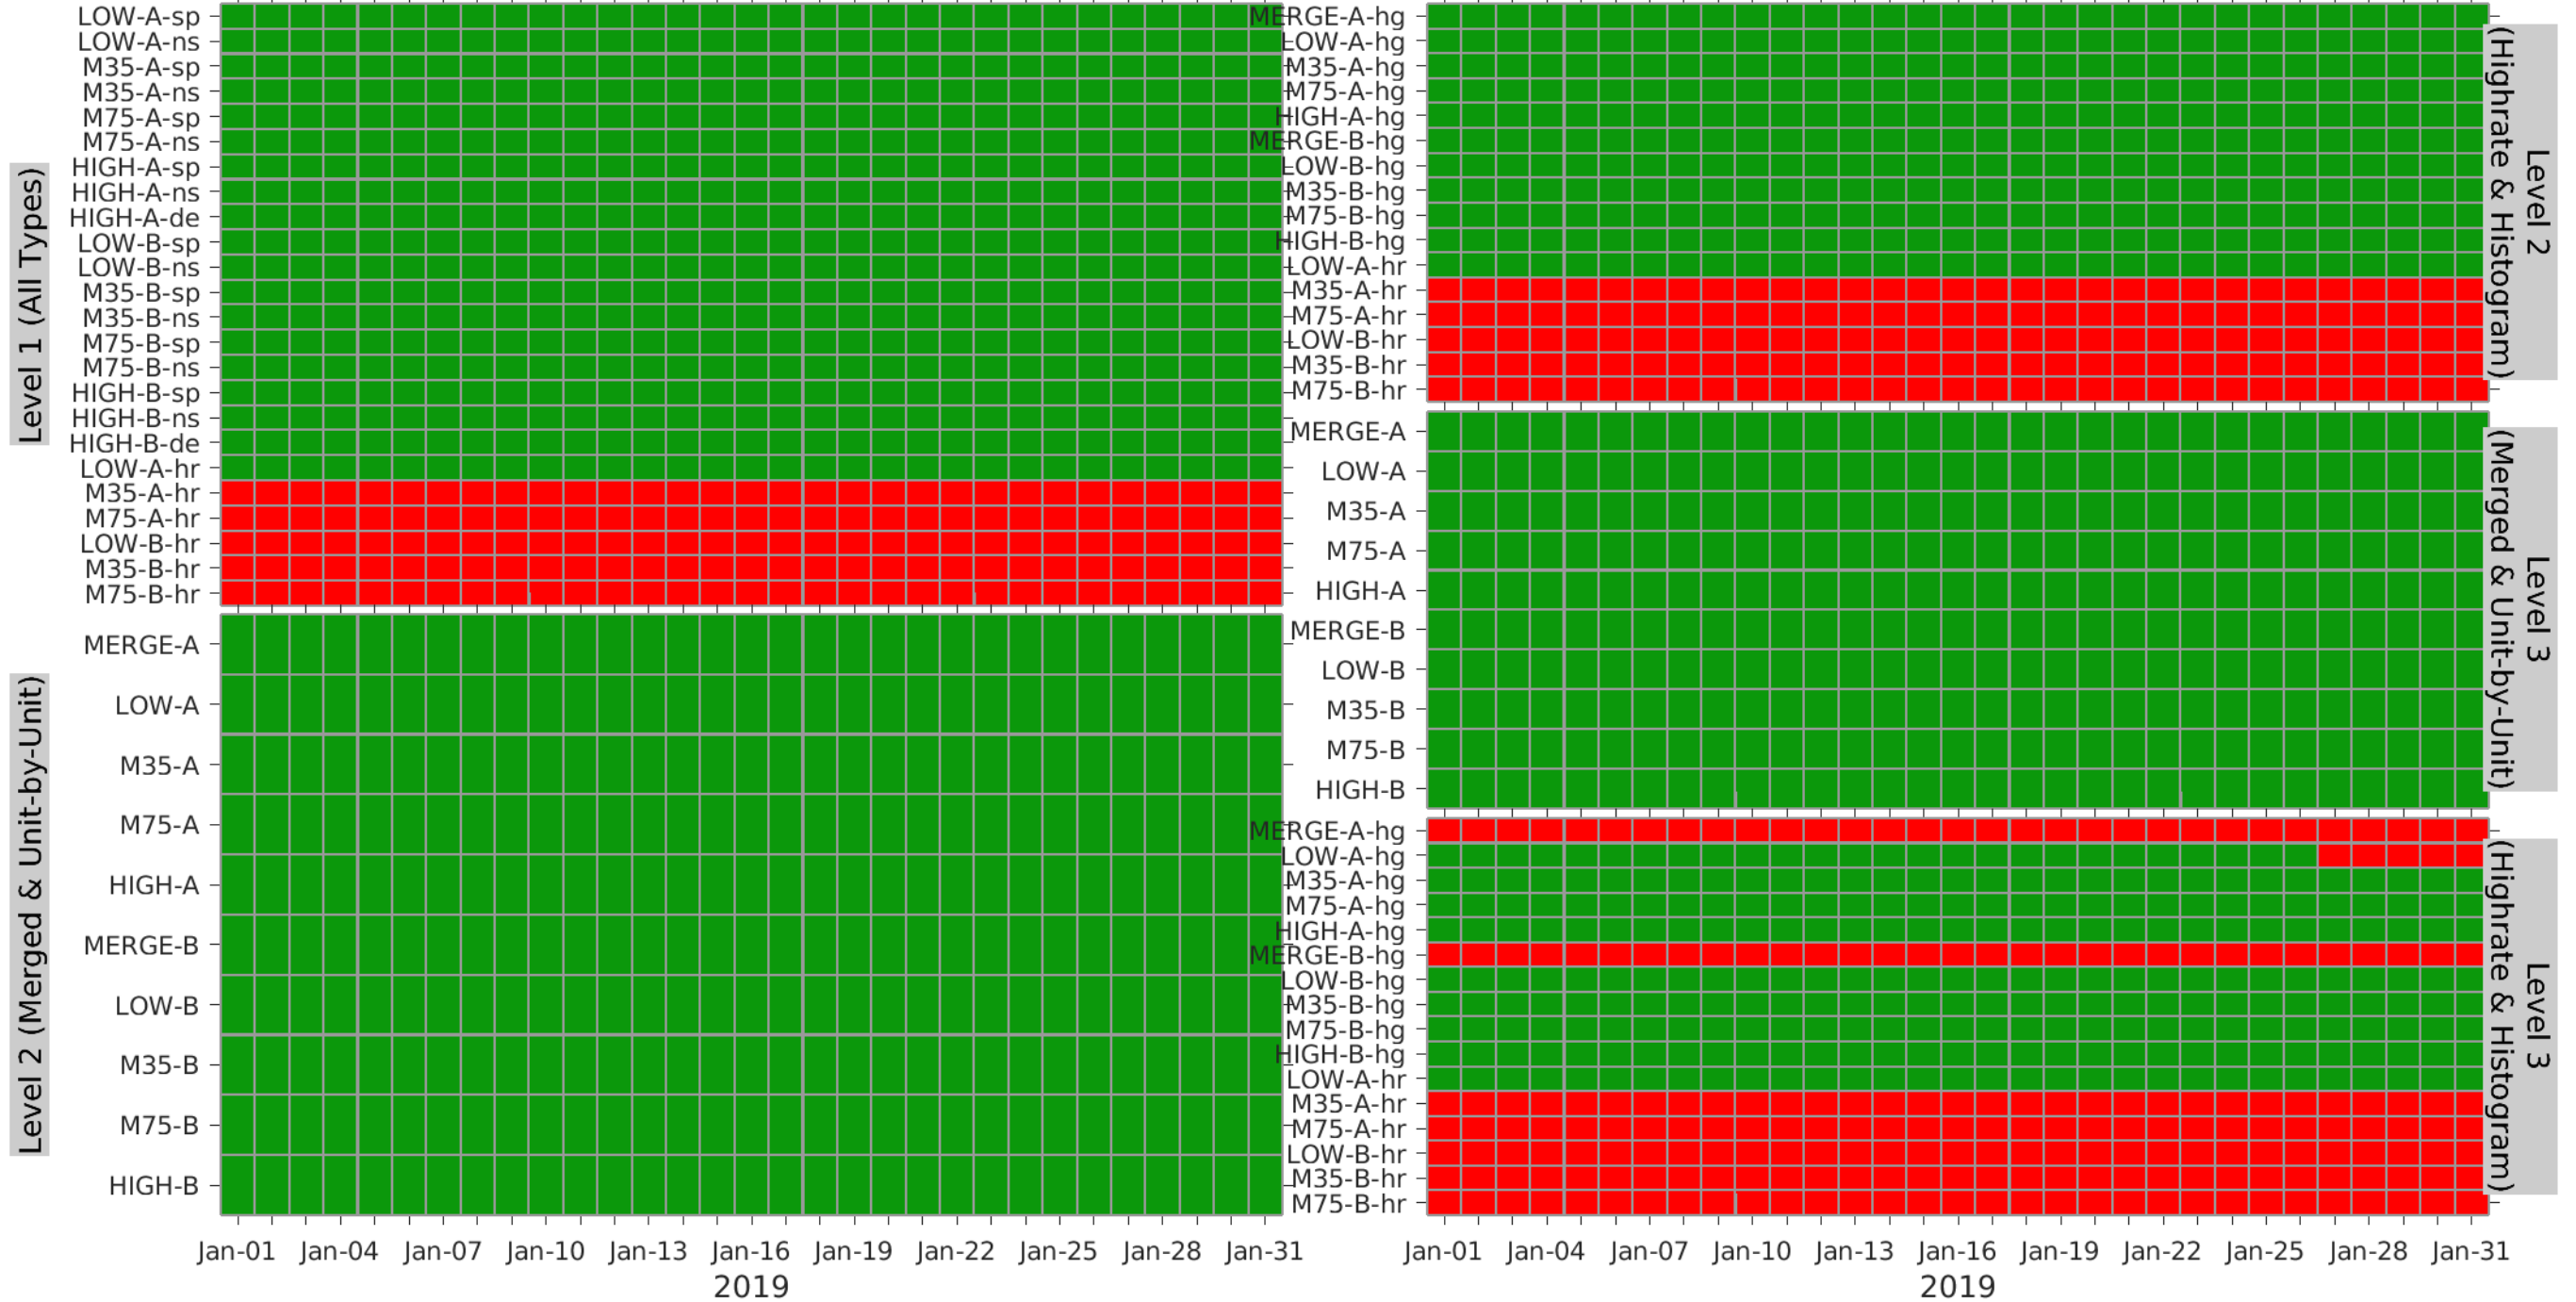

sp=spin-based (science) | ns=non-science (housekeeping & status) | hr=highrate (LOW/MED only) | hg=histogram | de=direct event (HIGH only)

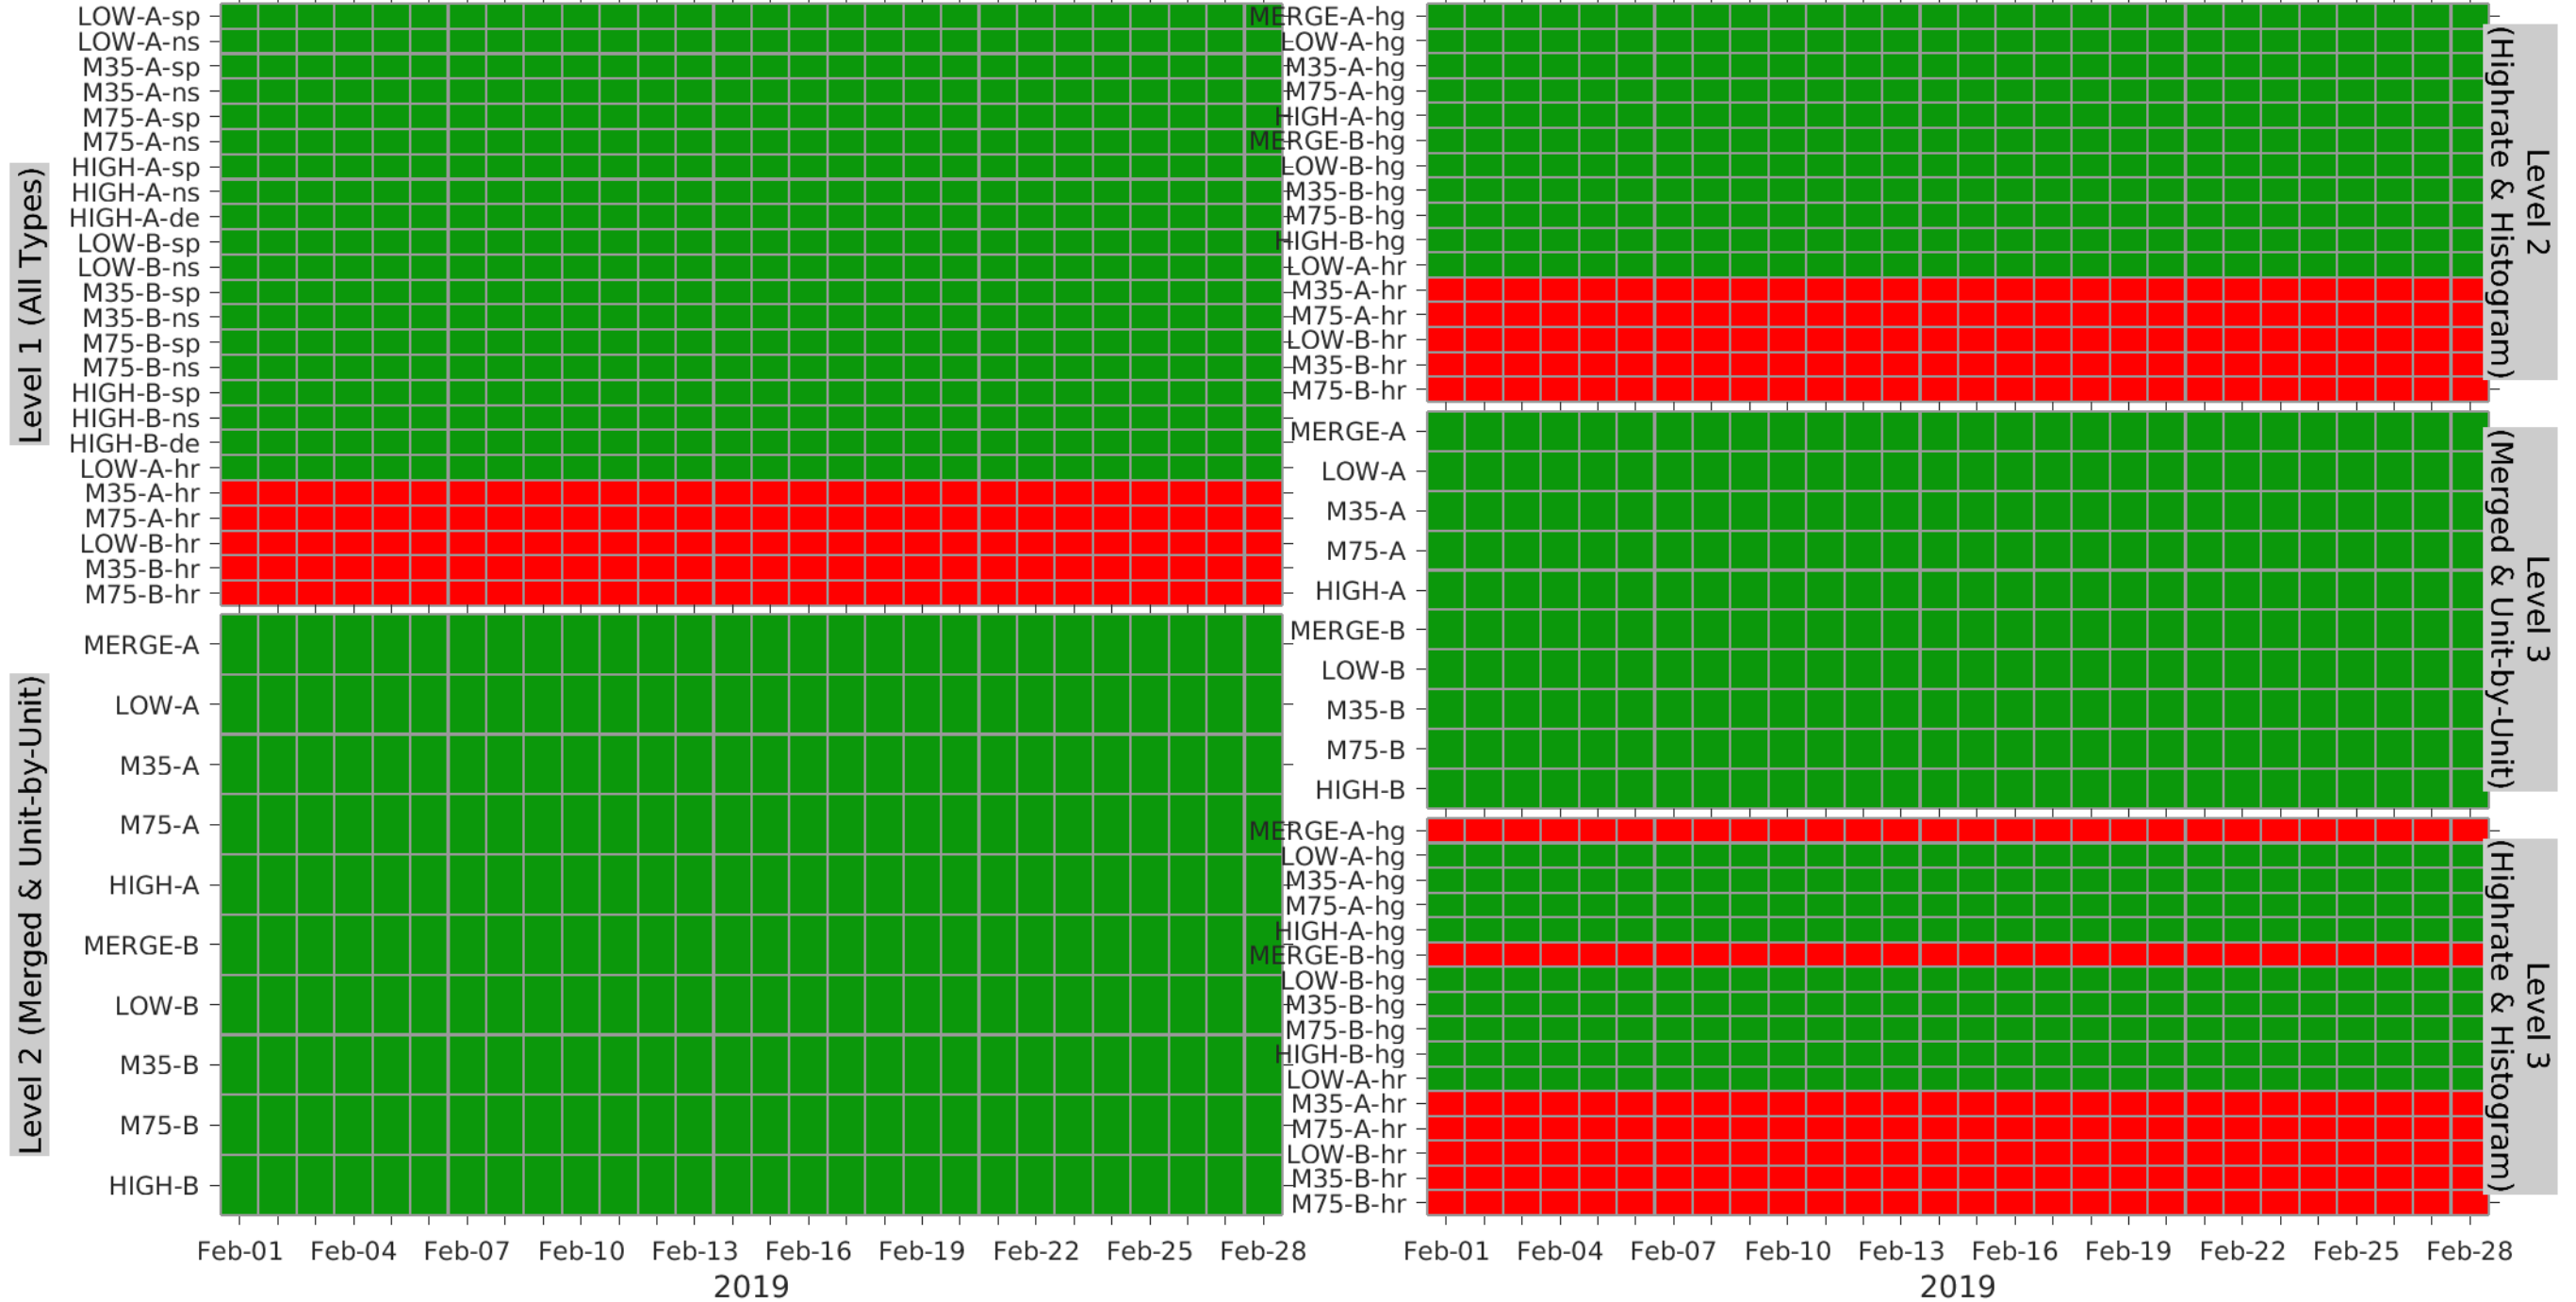

MagEIS Data Files | Created on: 2021/10/21 | Green = File Exists | Red = File Does Not Exist

sp=spin-based (science) | ns=non-science (housekeeping & status) | hr=highrate (LOW/MED only) | hg=histogram | de=direct event (HIGH only)

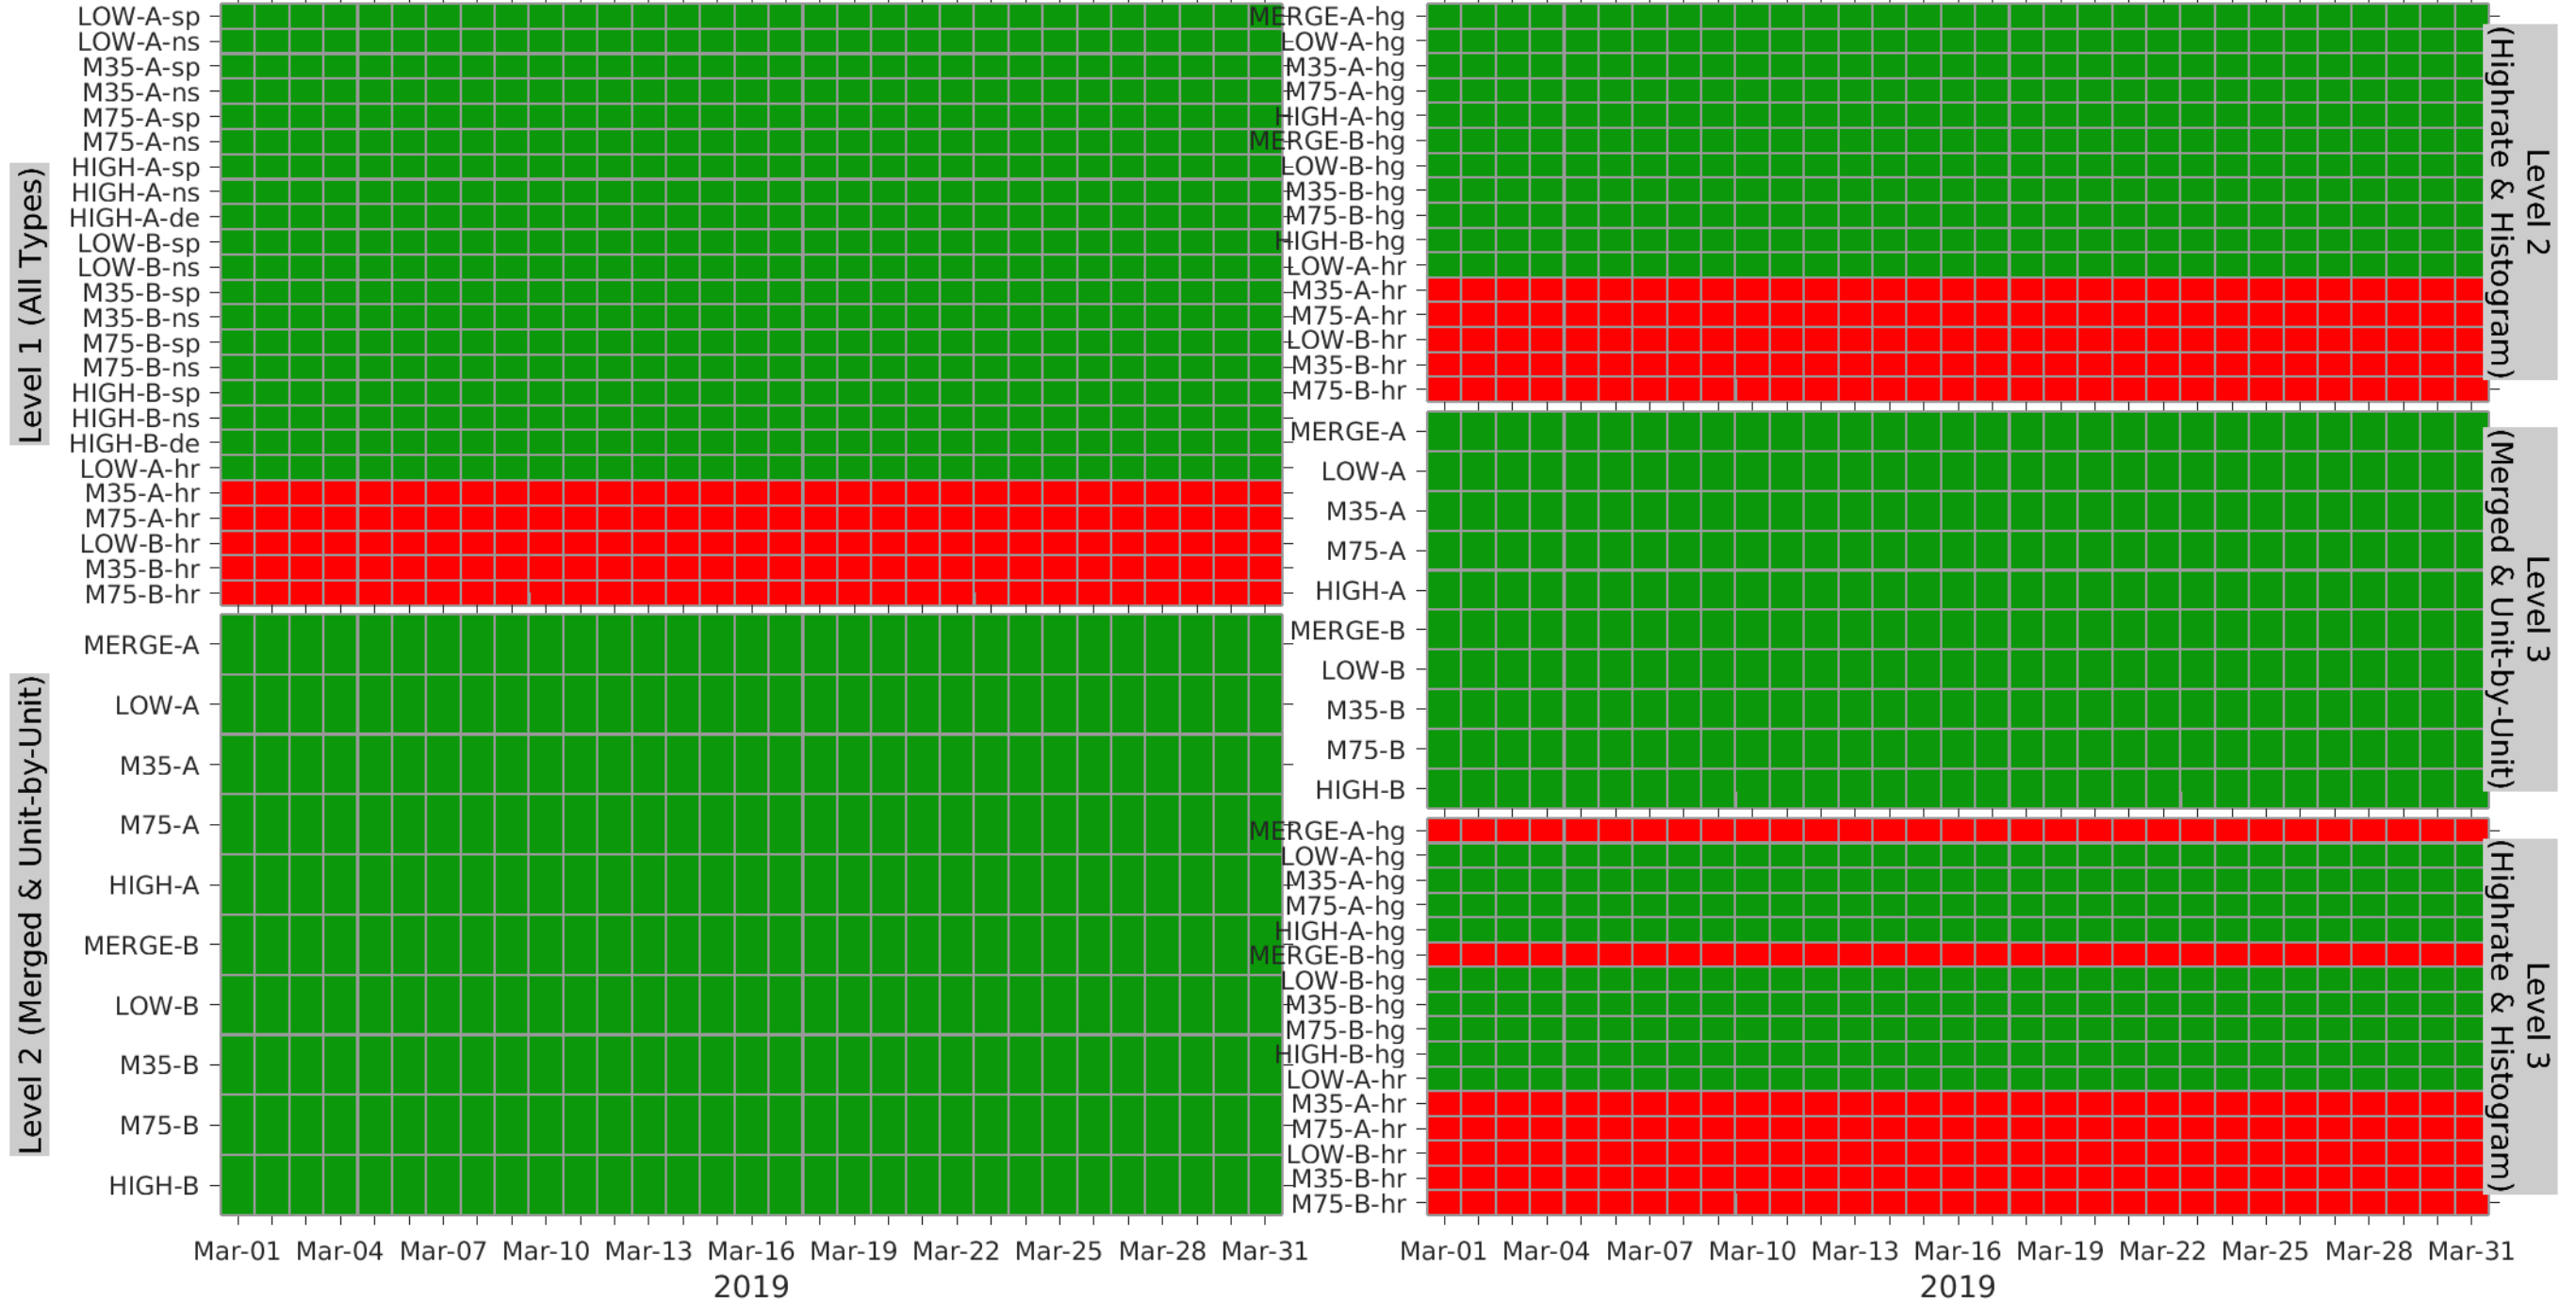



MagEIS Data Files | Created on: 2021/10/21 | Green = File Exists | Red = File Does Not Exist

sp=spin-based (science) | ns=non-science (housekeeping & status) | hr=highrate (LOW/MED only) | hg=histogram | de=direct event (HIGH only)

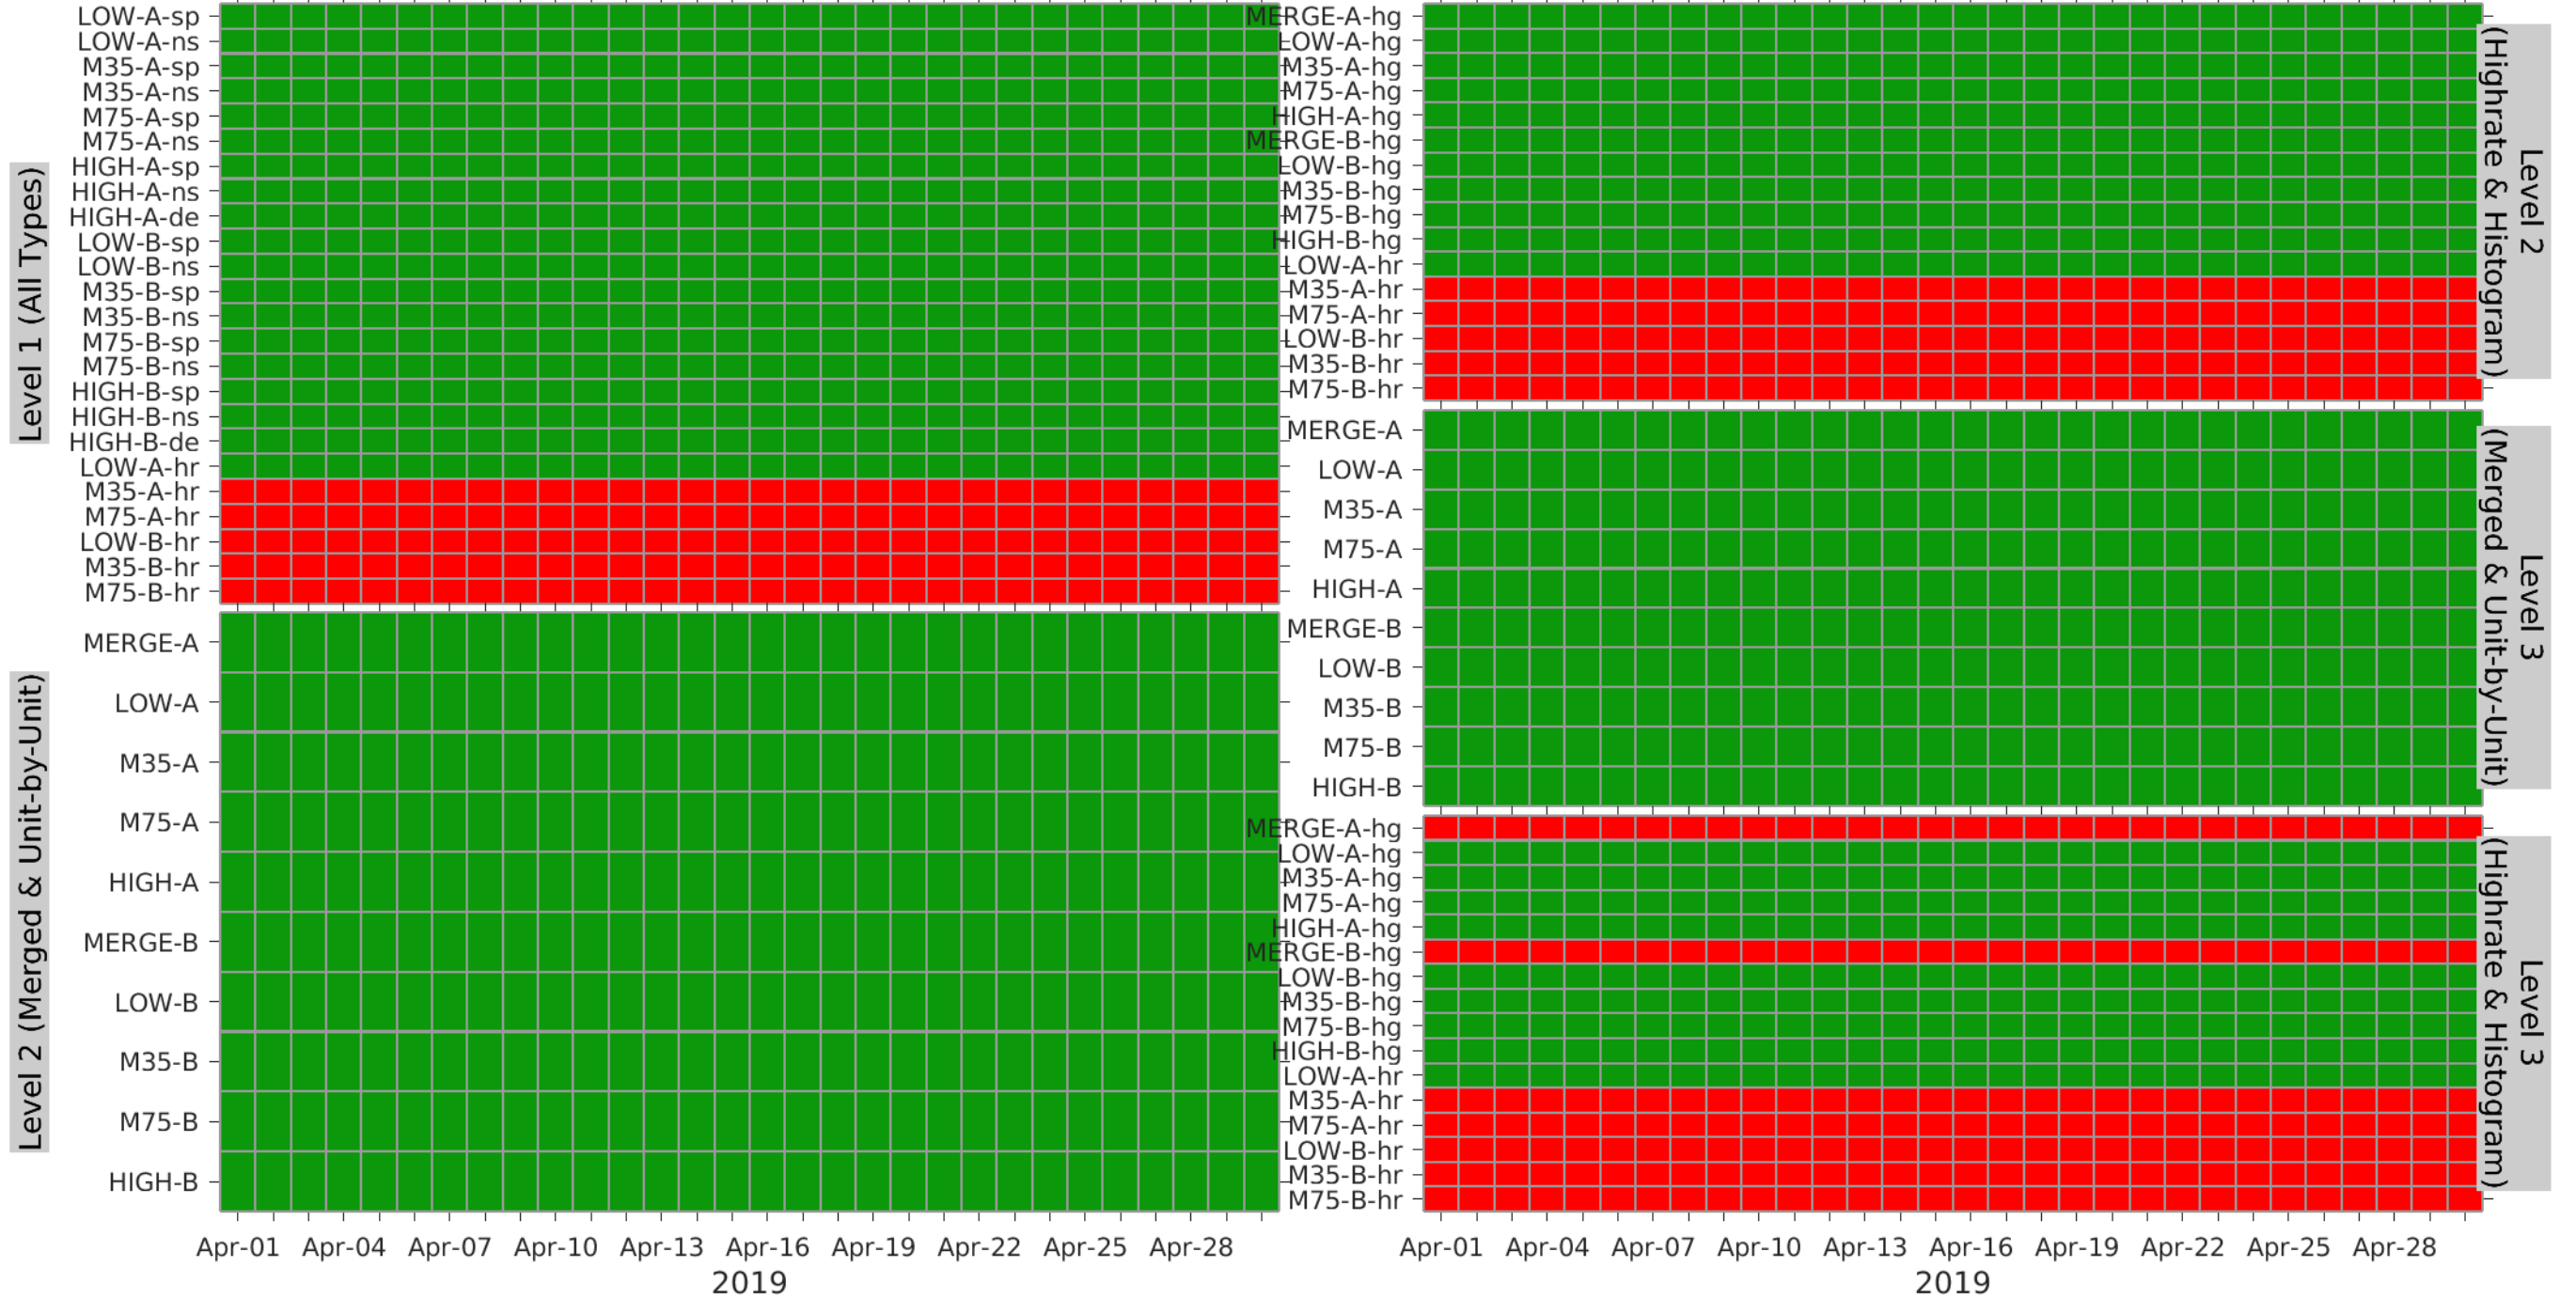

MagEIS Data Files | Created on: 2021/10/21 | Green = File Exists | Red = File Does Not Exist

sp=spin-based (science) | ns=non-science (housekeeping & status) | hr=highrate (LOW/MED only) | hg=histogram | de=direct event (HIGH only)

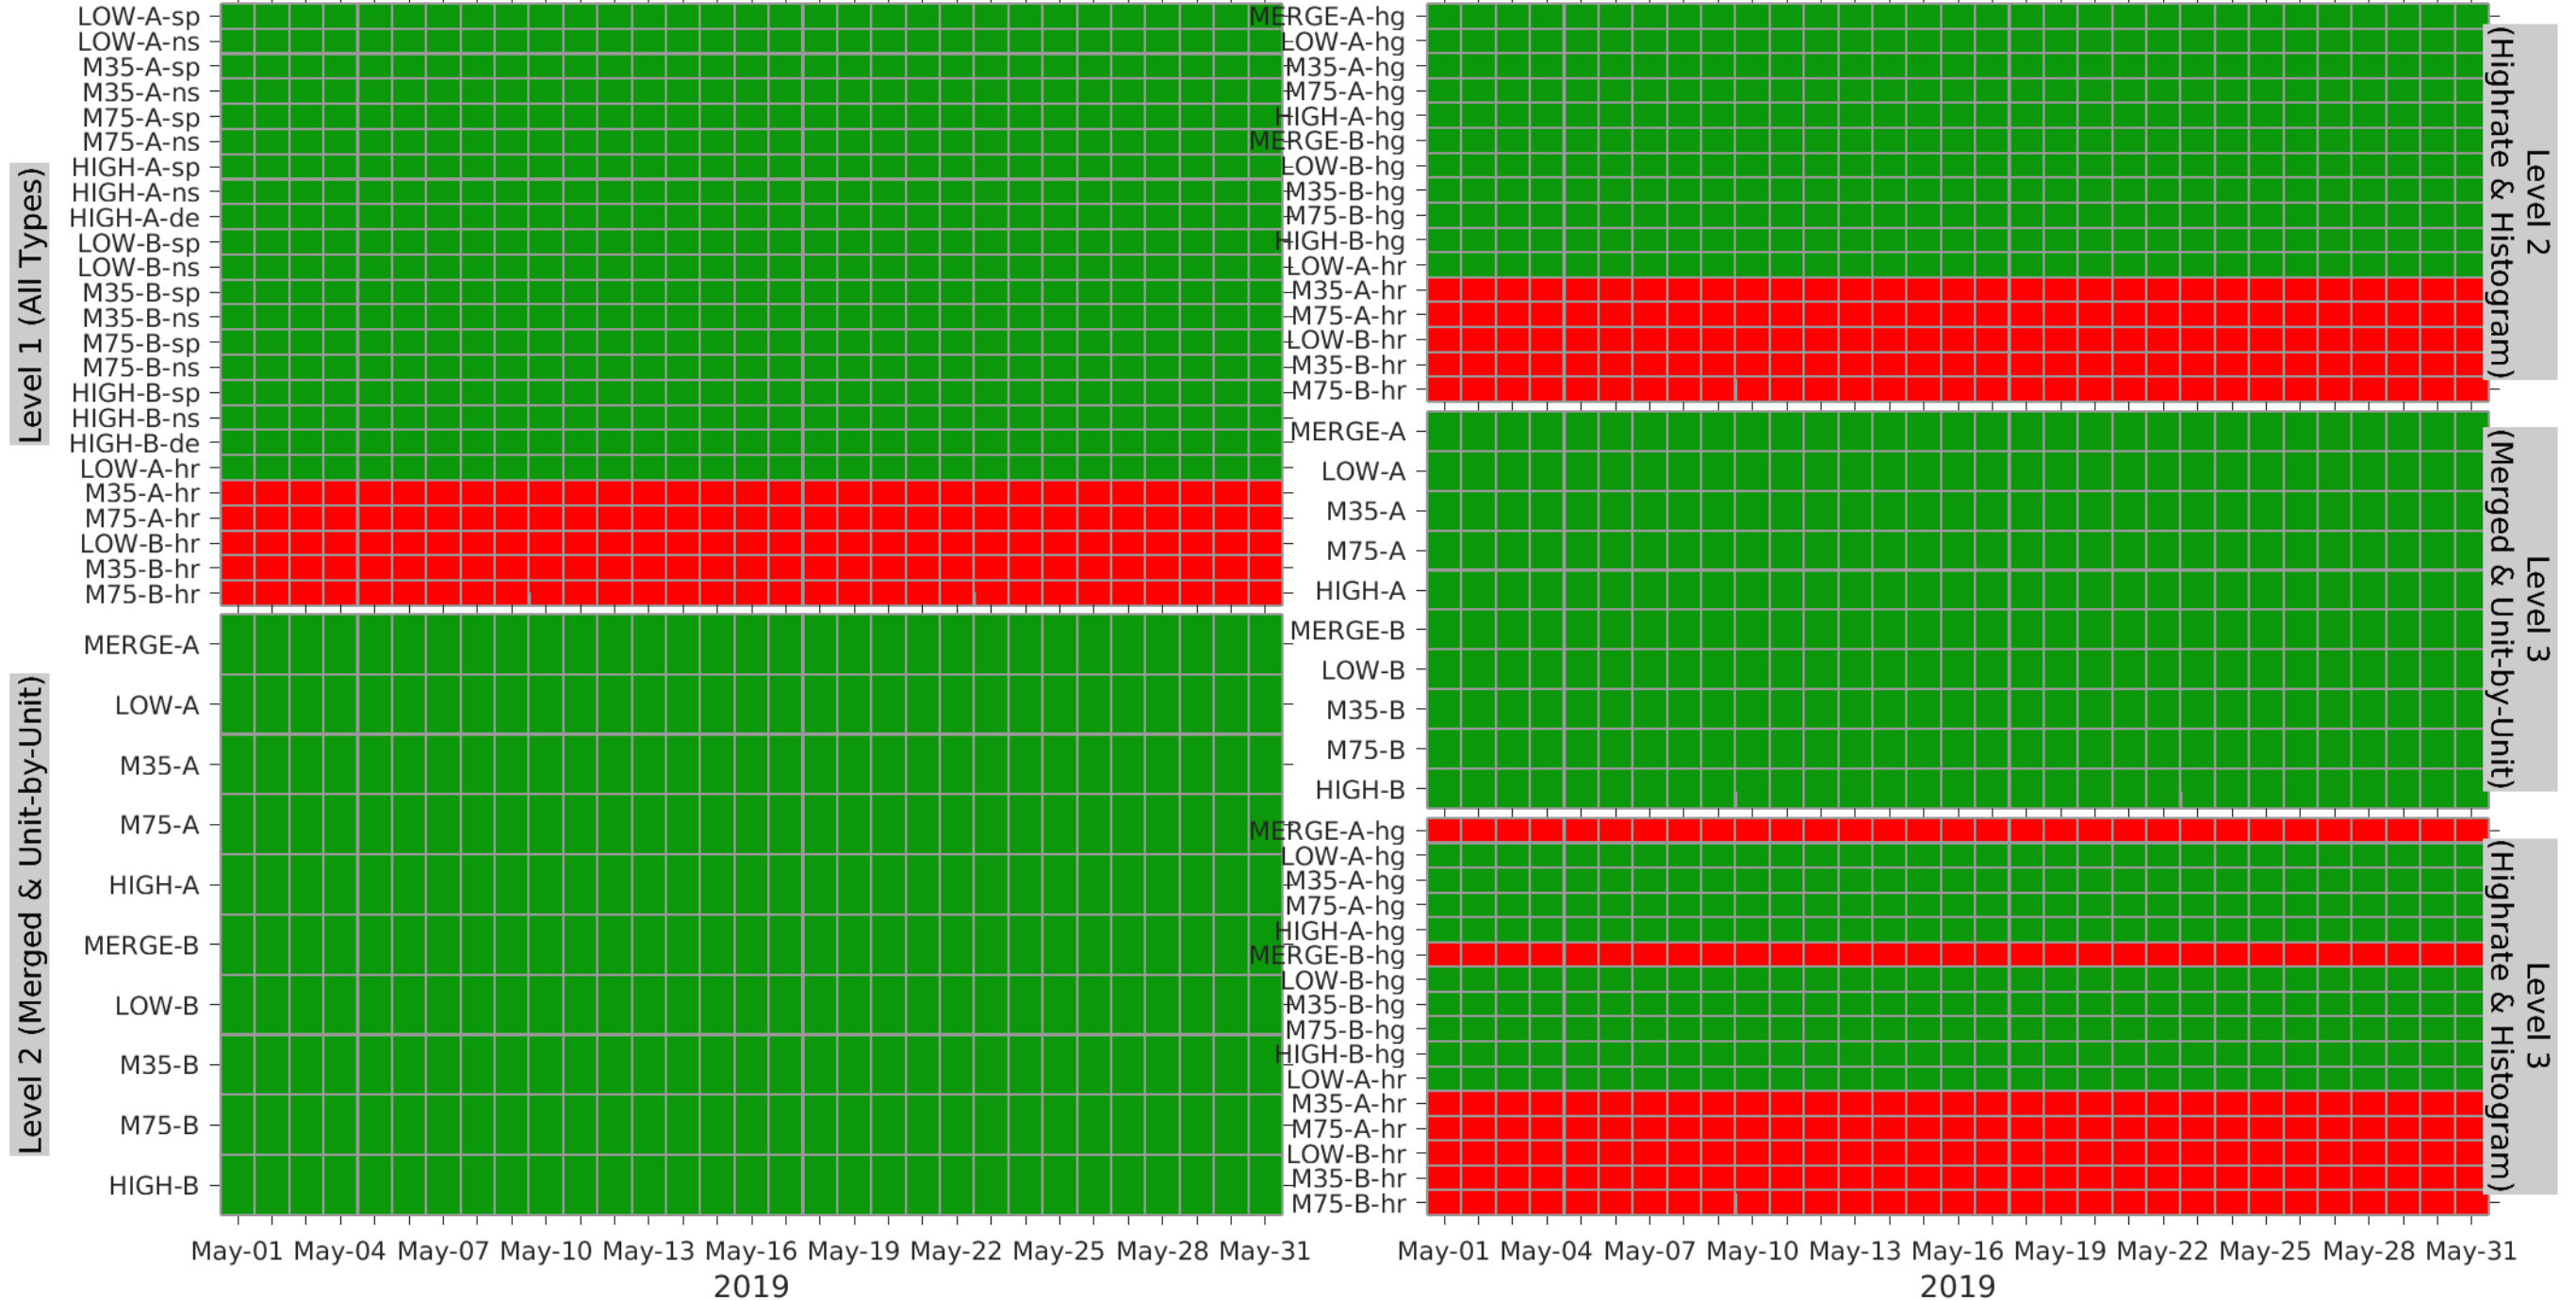

MagEIS Data Files | Created on: 2021/10/21 | Green = File Exists | Red = File Does Not Exist

sp=spin-based (science) | ns=non-science (housekeeping & status) | hr=highrate (LOW/MED only) | hg=histogram | de=direct event (HIGH only)

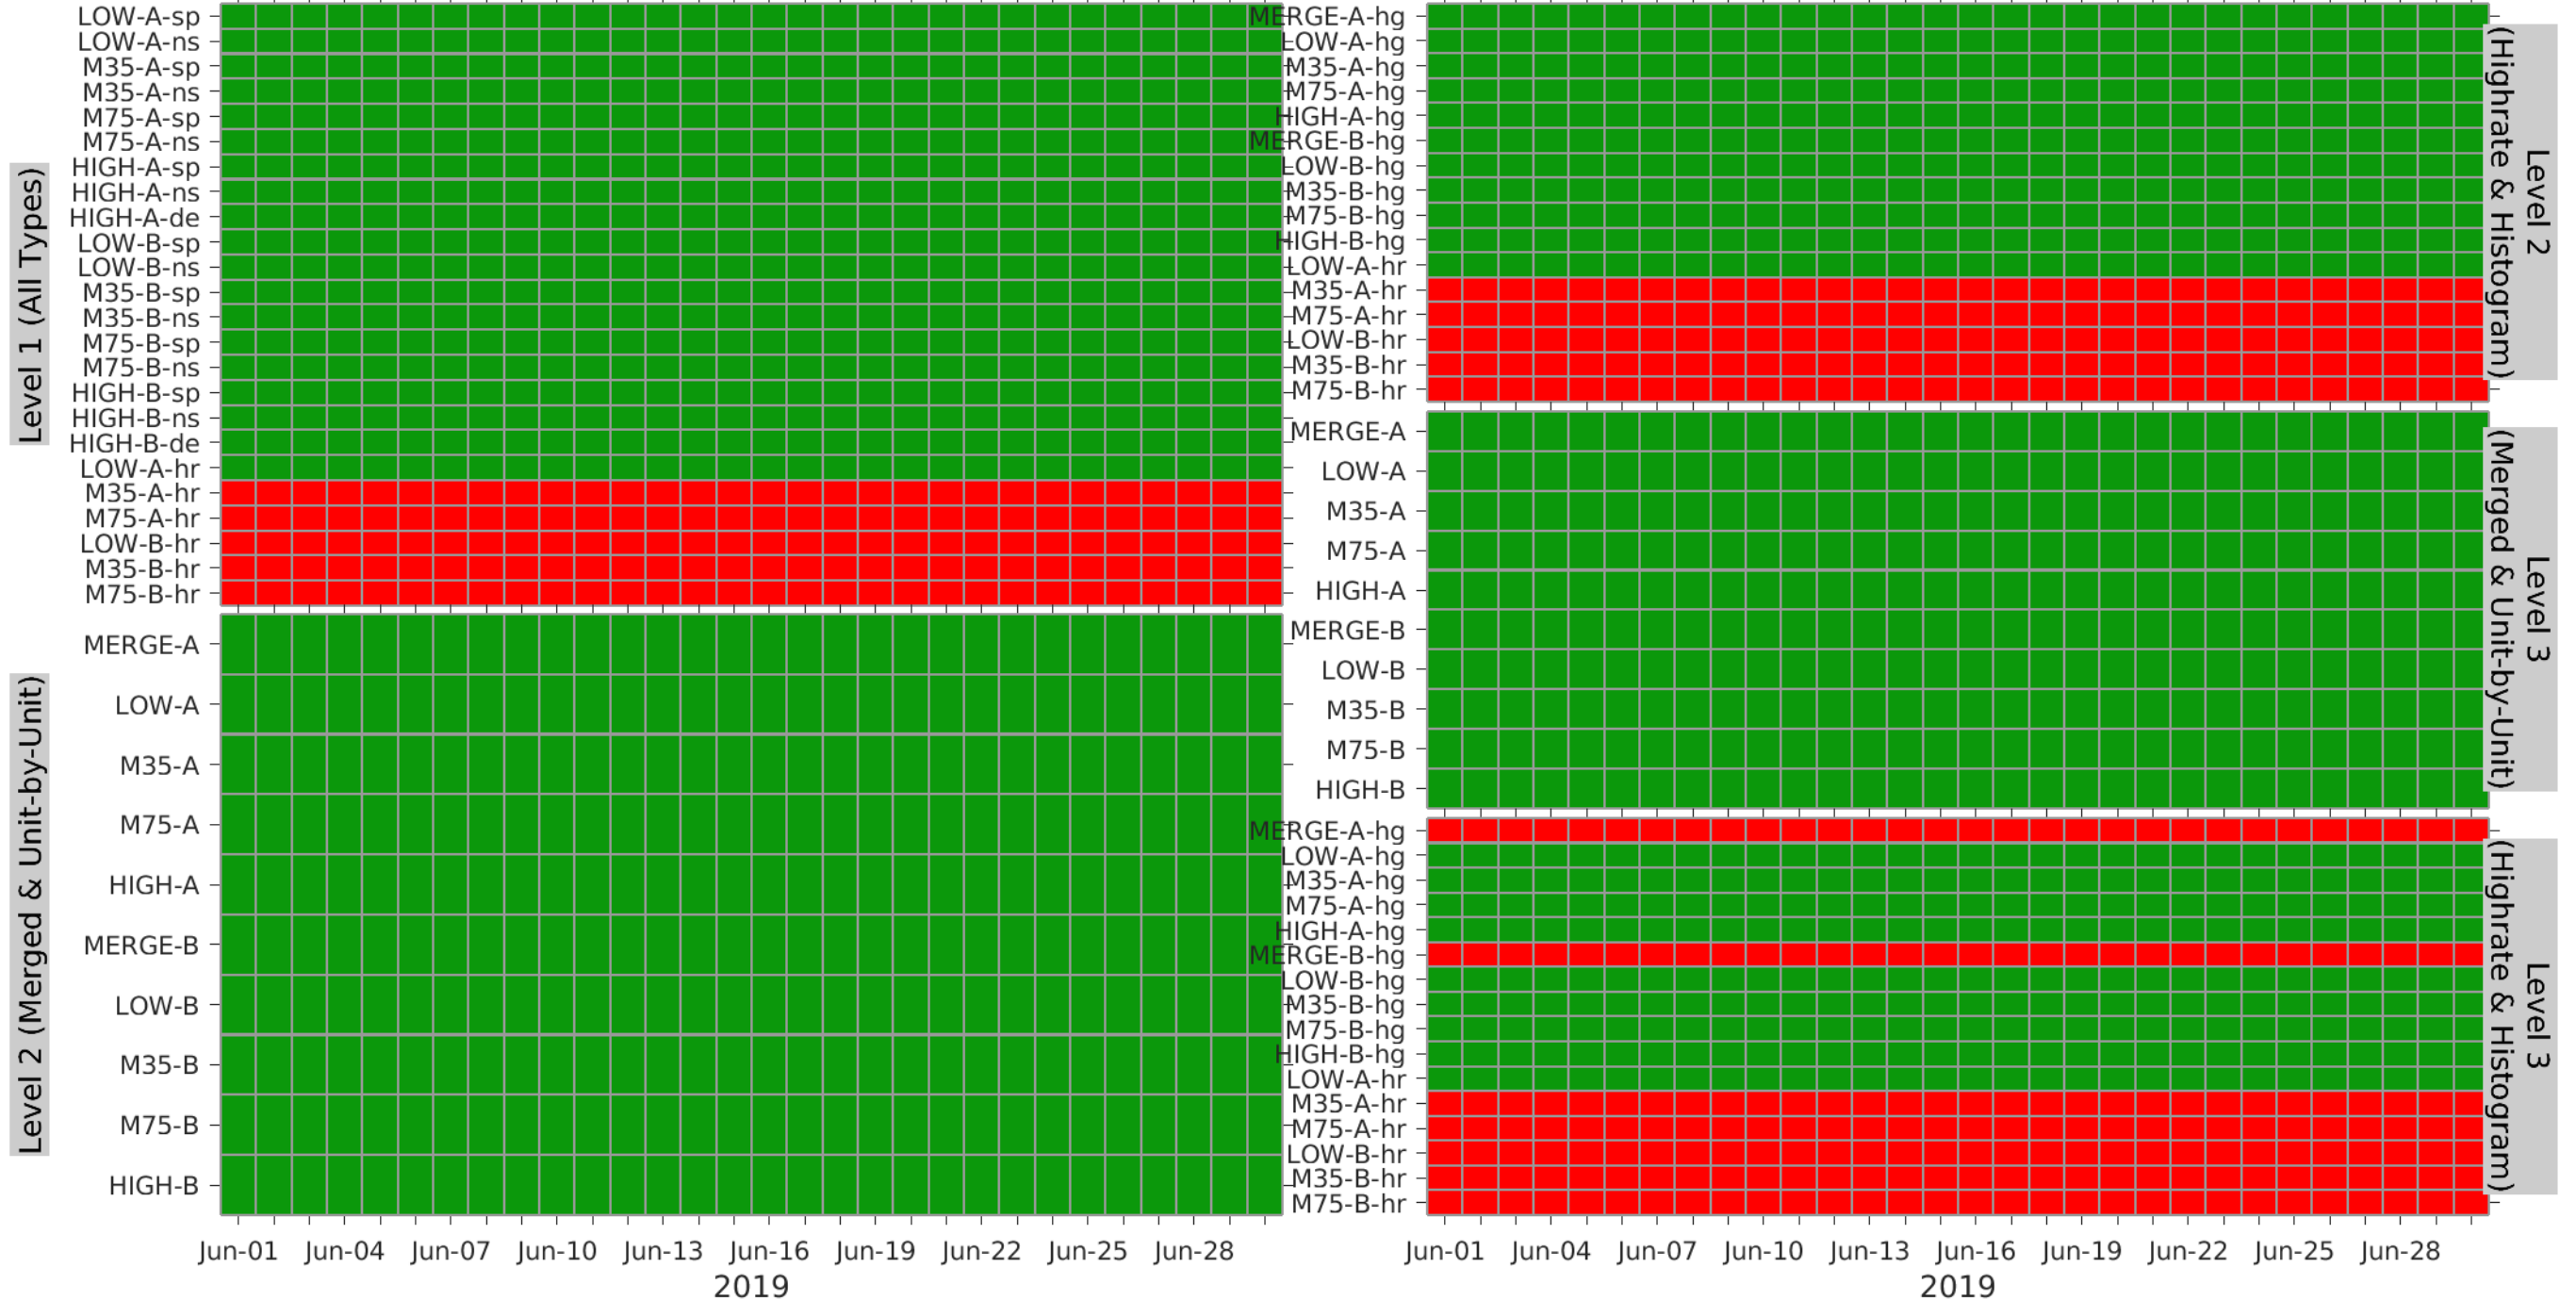

MagEIS Data Files | Created on: 2021/10/21 | Green = File Exists | Red = File Does Not Exist

sp=spin-based (science) | ns=non-science (housekeeping & status) | hr=highrate (LOW/MED only) | hg=histogram | de=direct event (HIGH only)

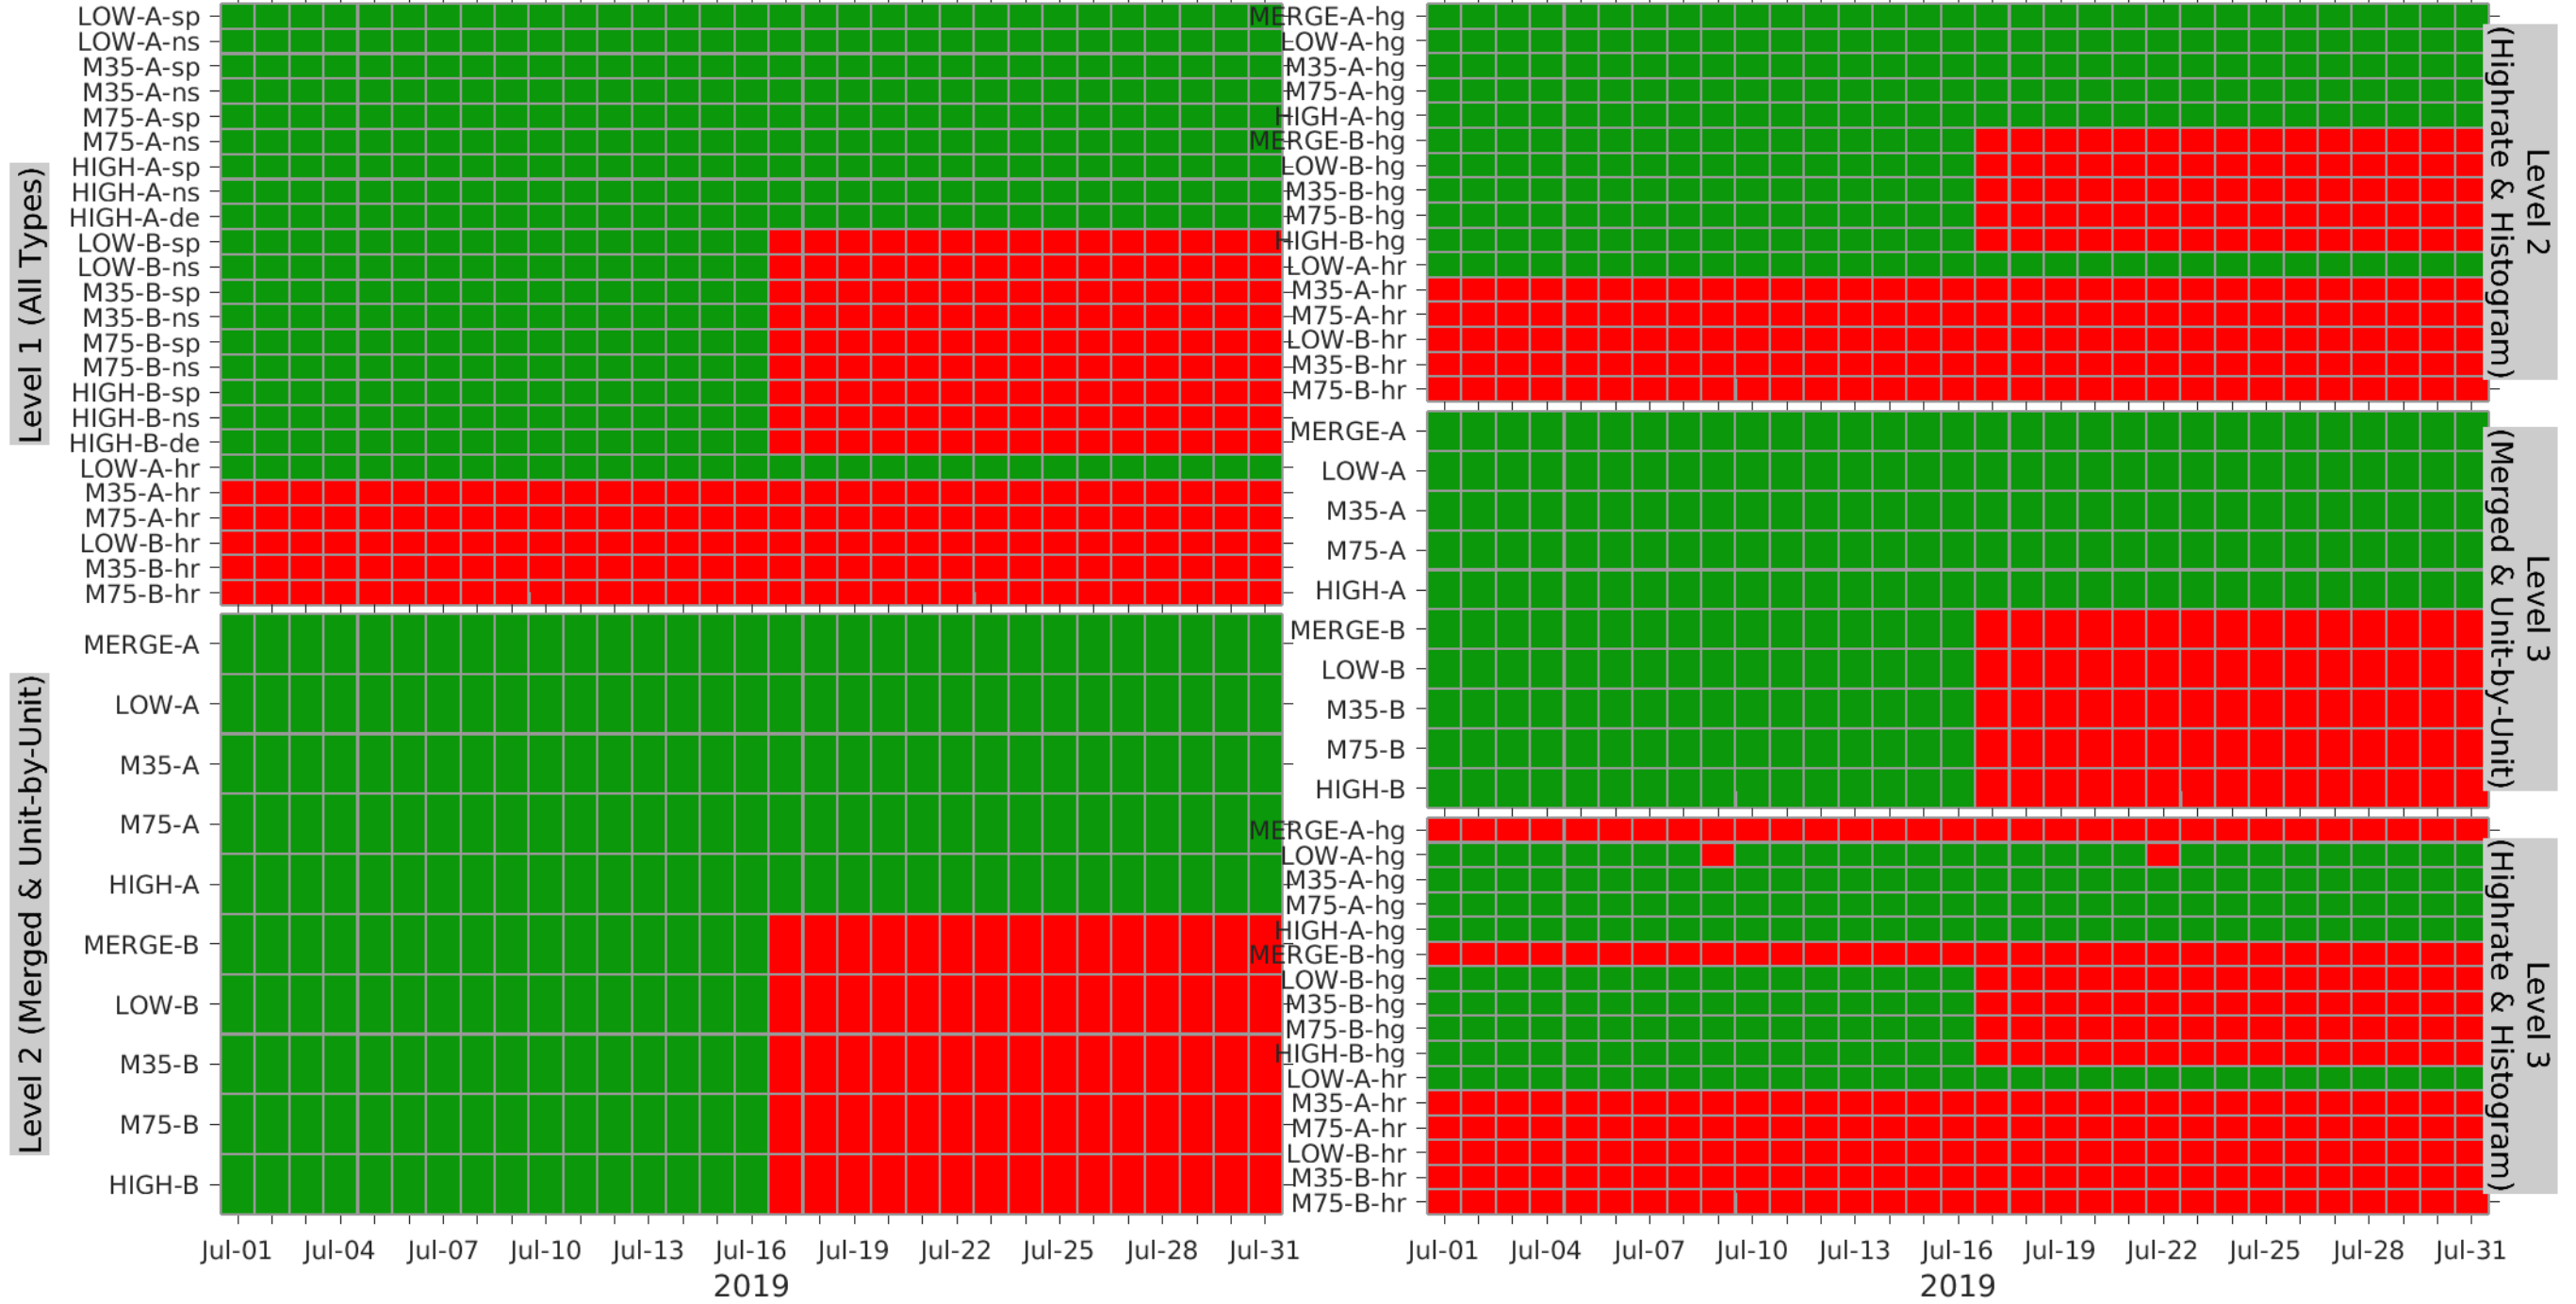

MagEIS Data Files | Created on: 2021/10/21 | Green = File Exists | Red = File Does Not Exist

sp=spin-based (science) | ns=non-science (housekeeping & status) | hr=highrate (LOW/MED only) | hg=histogram | de=direct event (HIGH only)

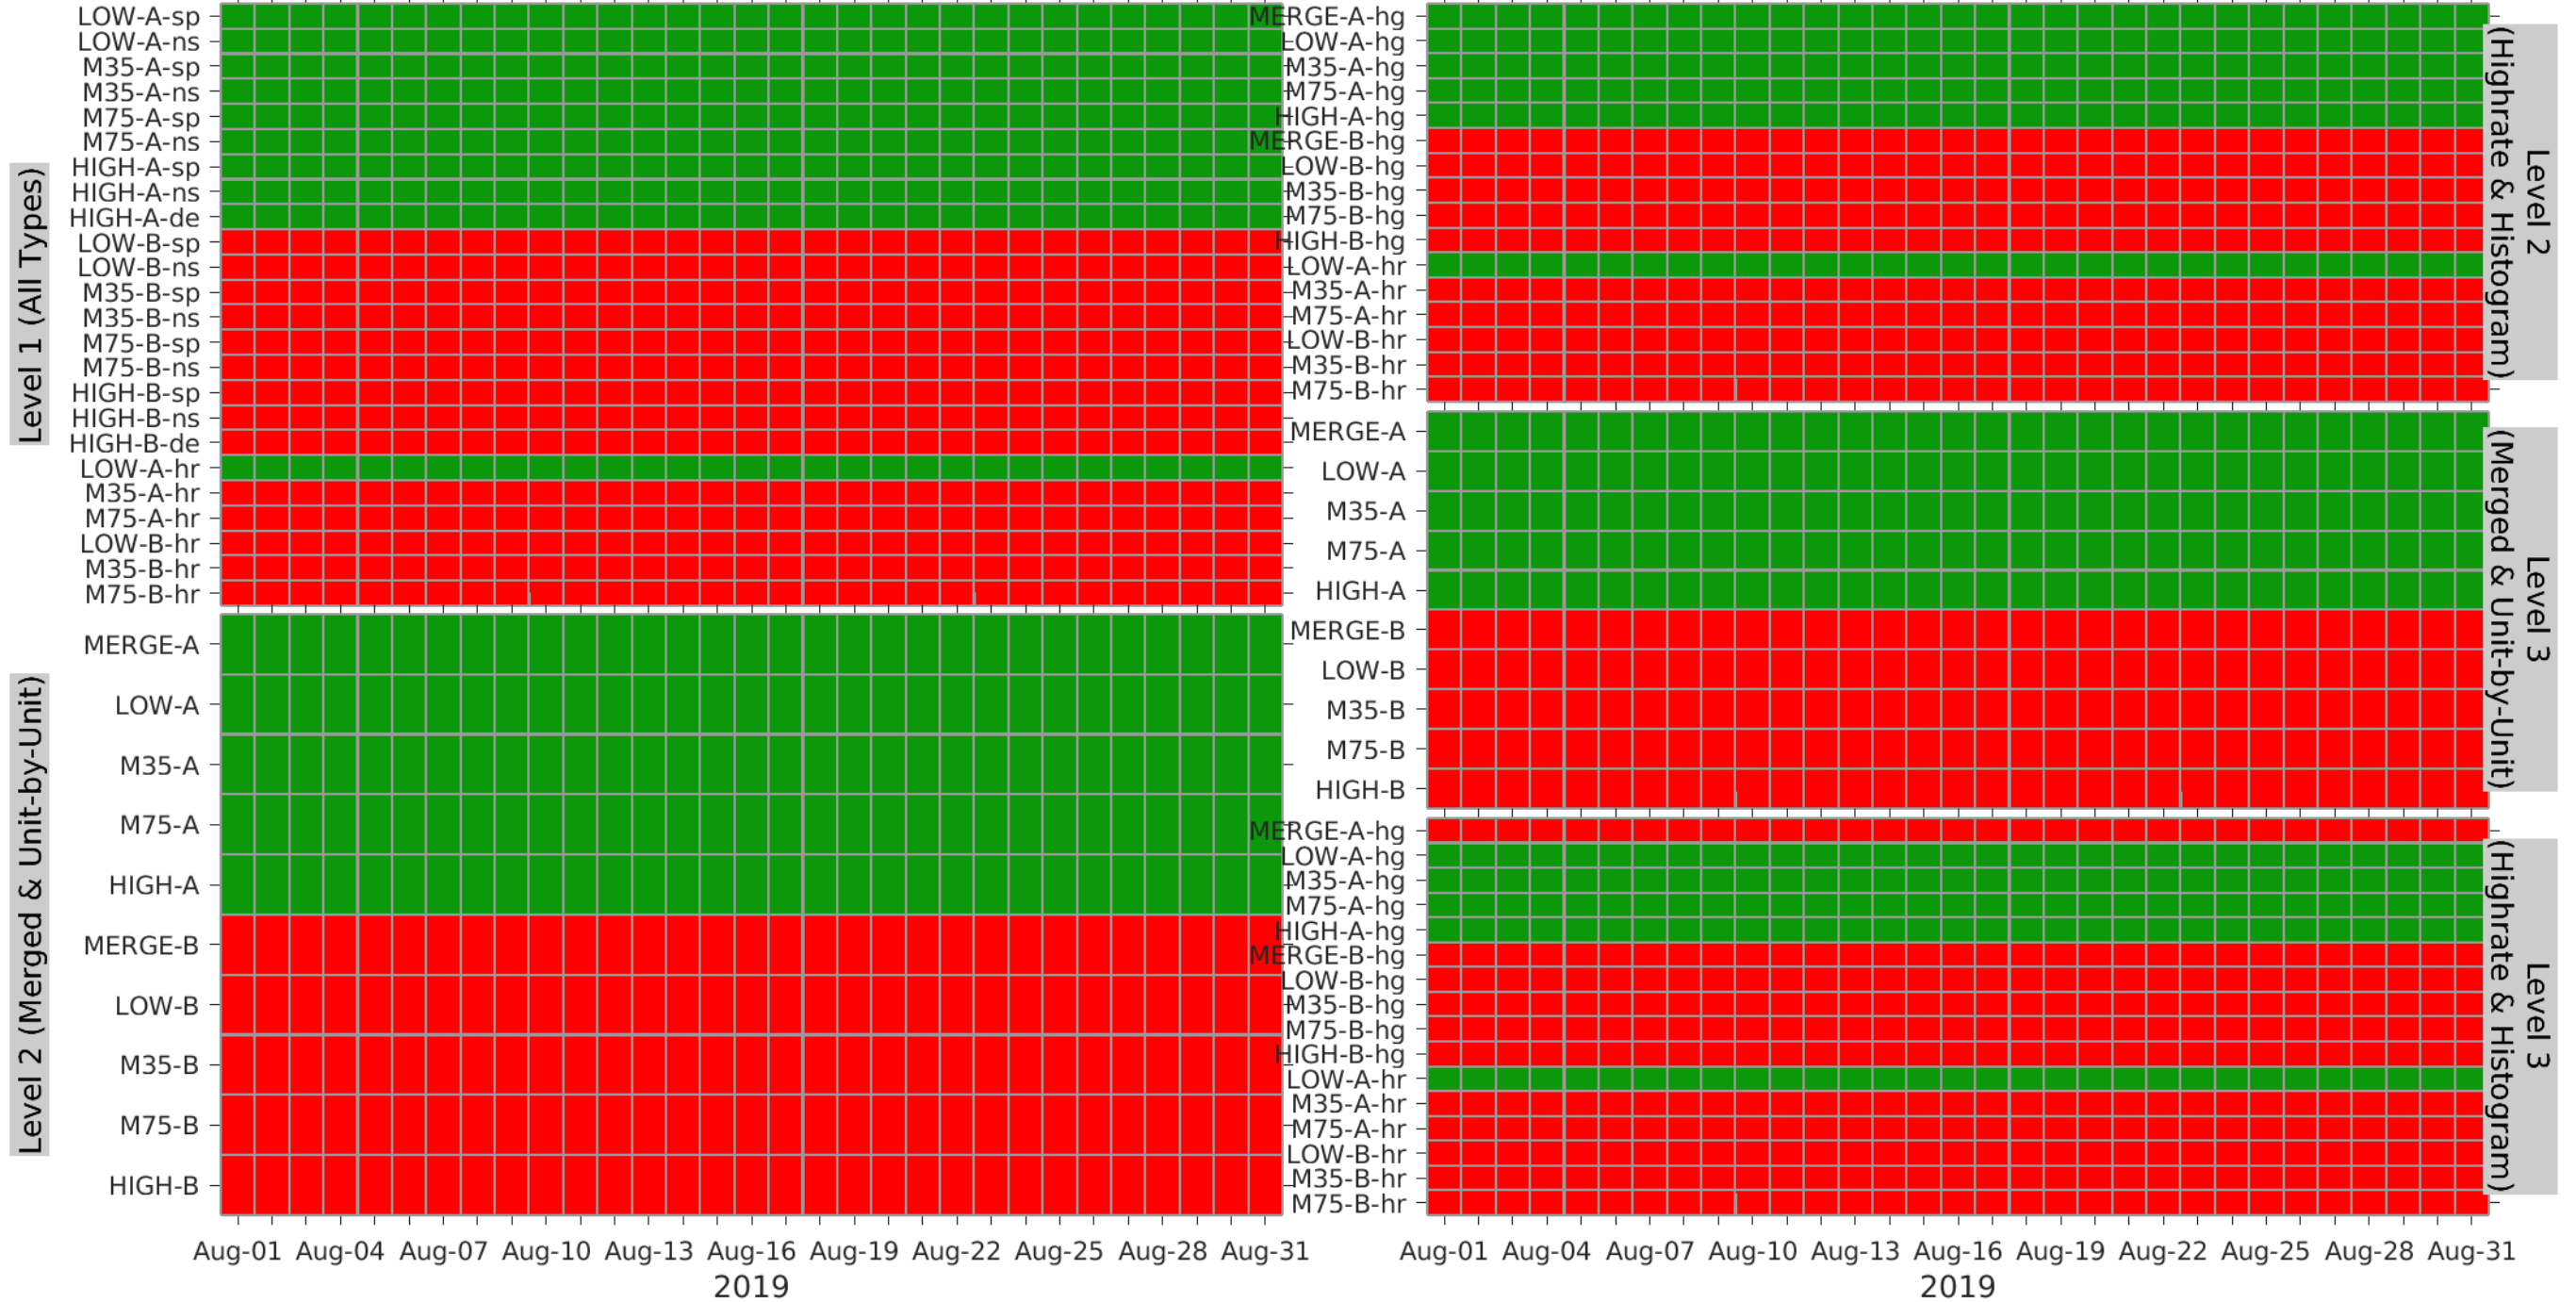

MagEIS Data Files | Created on: 2021/10/21 | Green = File Exists | Red = File Does Not Exist

sp=spin-based (science) | ns=non-science (housekeeping & status) | hr=highrate (LOW/MED only) | hg=histogram | de=direct event (HIGH only)

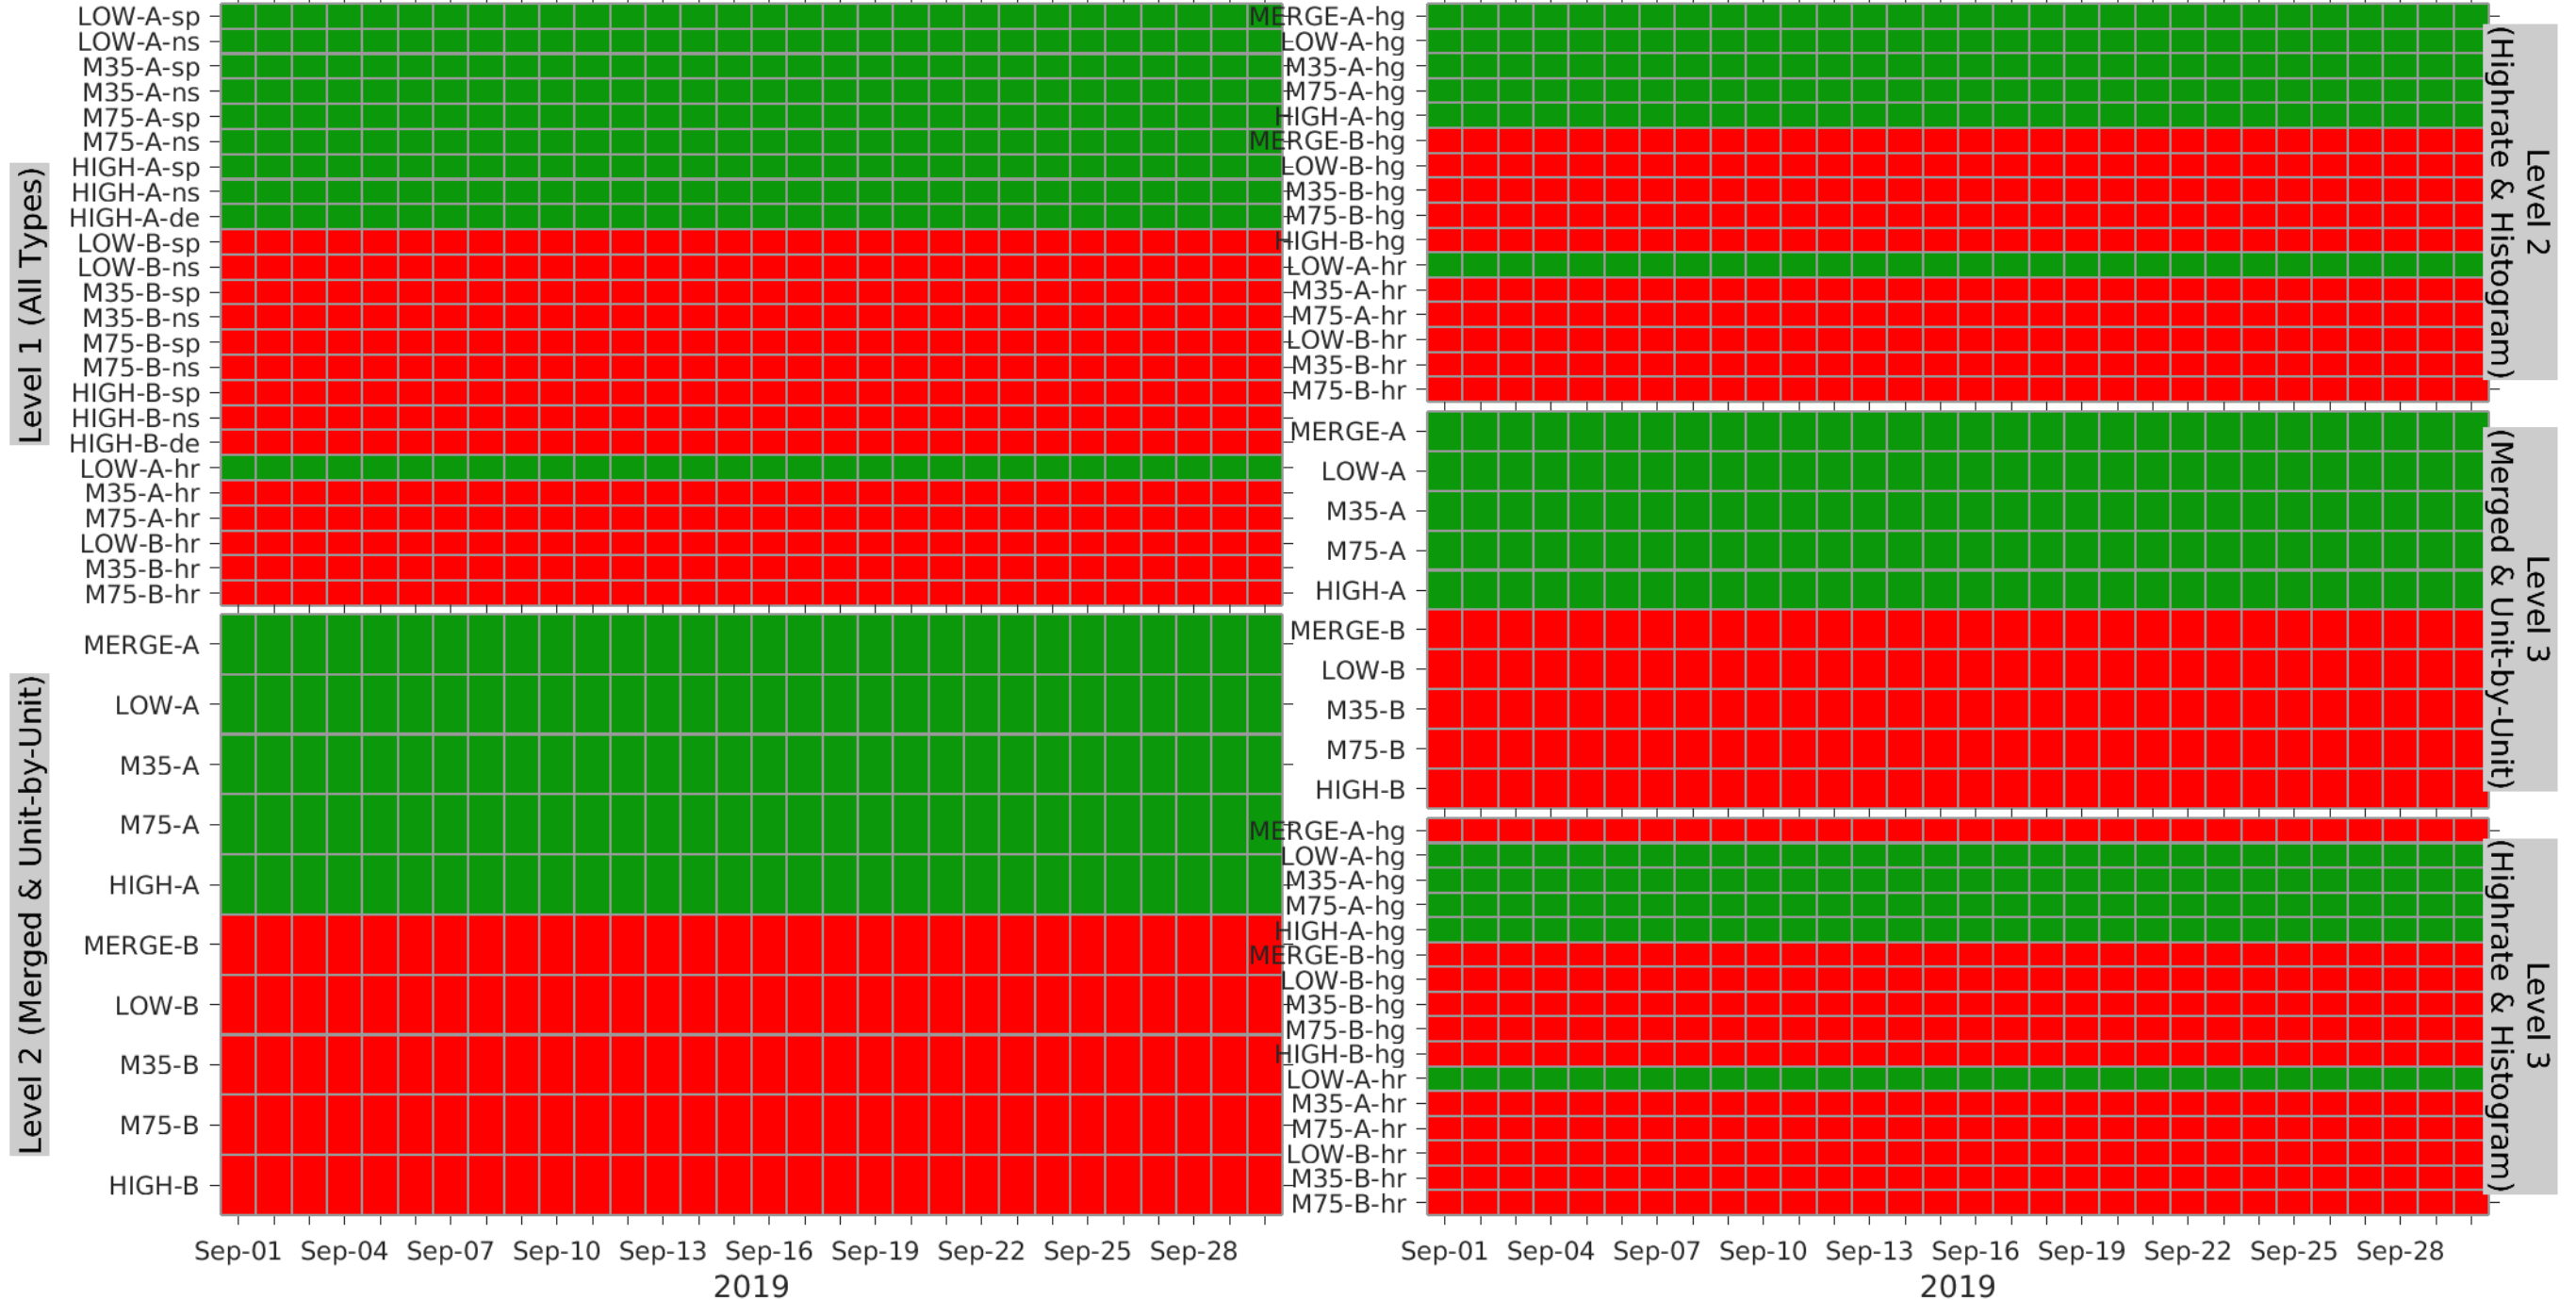

MagEIS Data Files | Created on: 2021/10/21 | Green = File Exists | Red = File Does Not Exist

sp=spin-based (science) | ns=non-science (housekeeping & status) | hr=highrate (LOW/MED only) | hg=histogram | de=direct event (HIGH only)

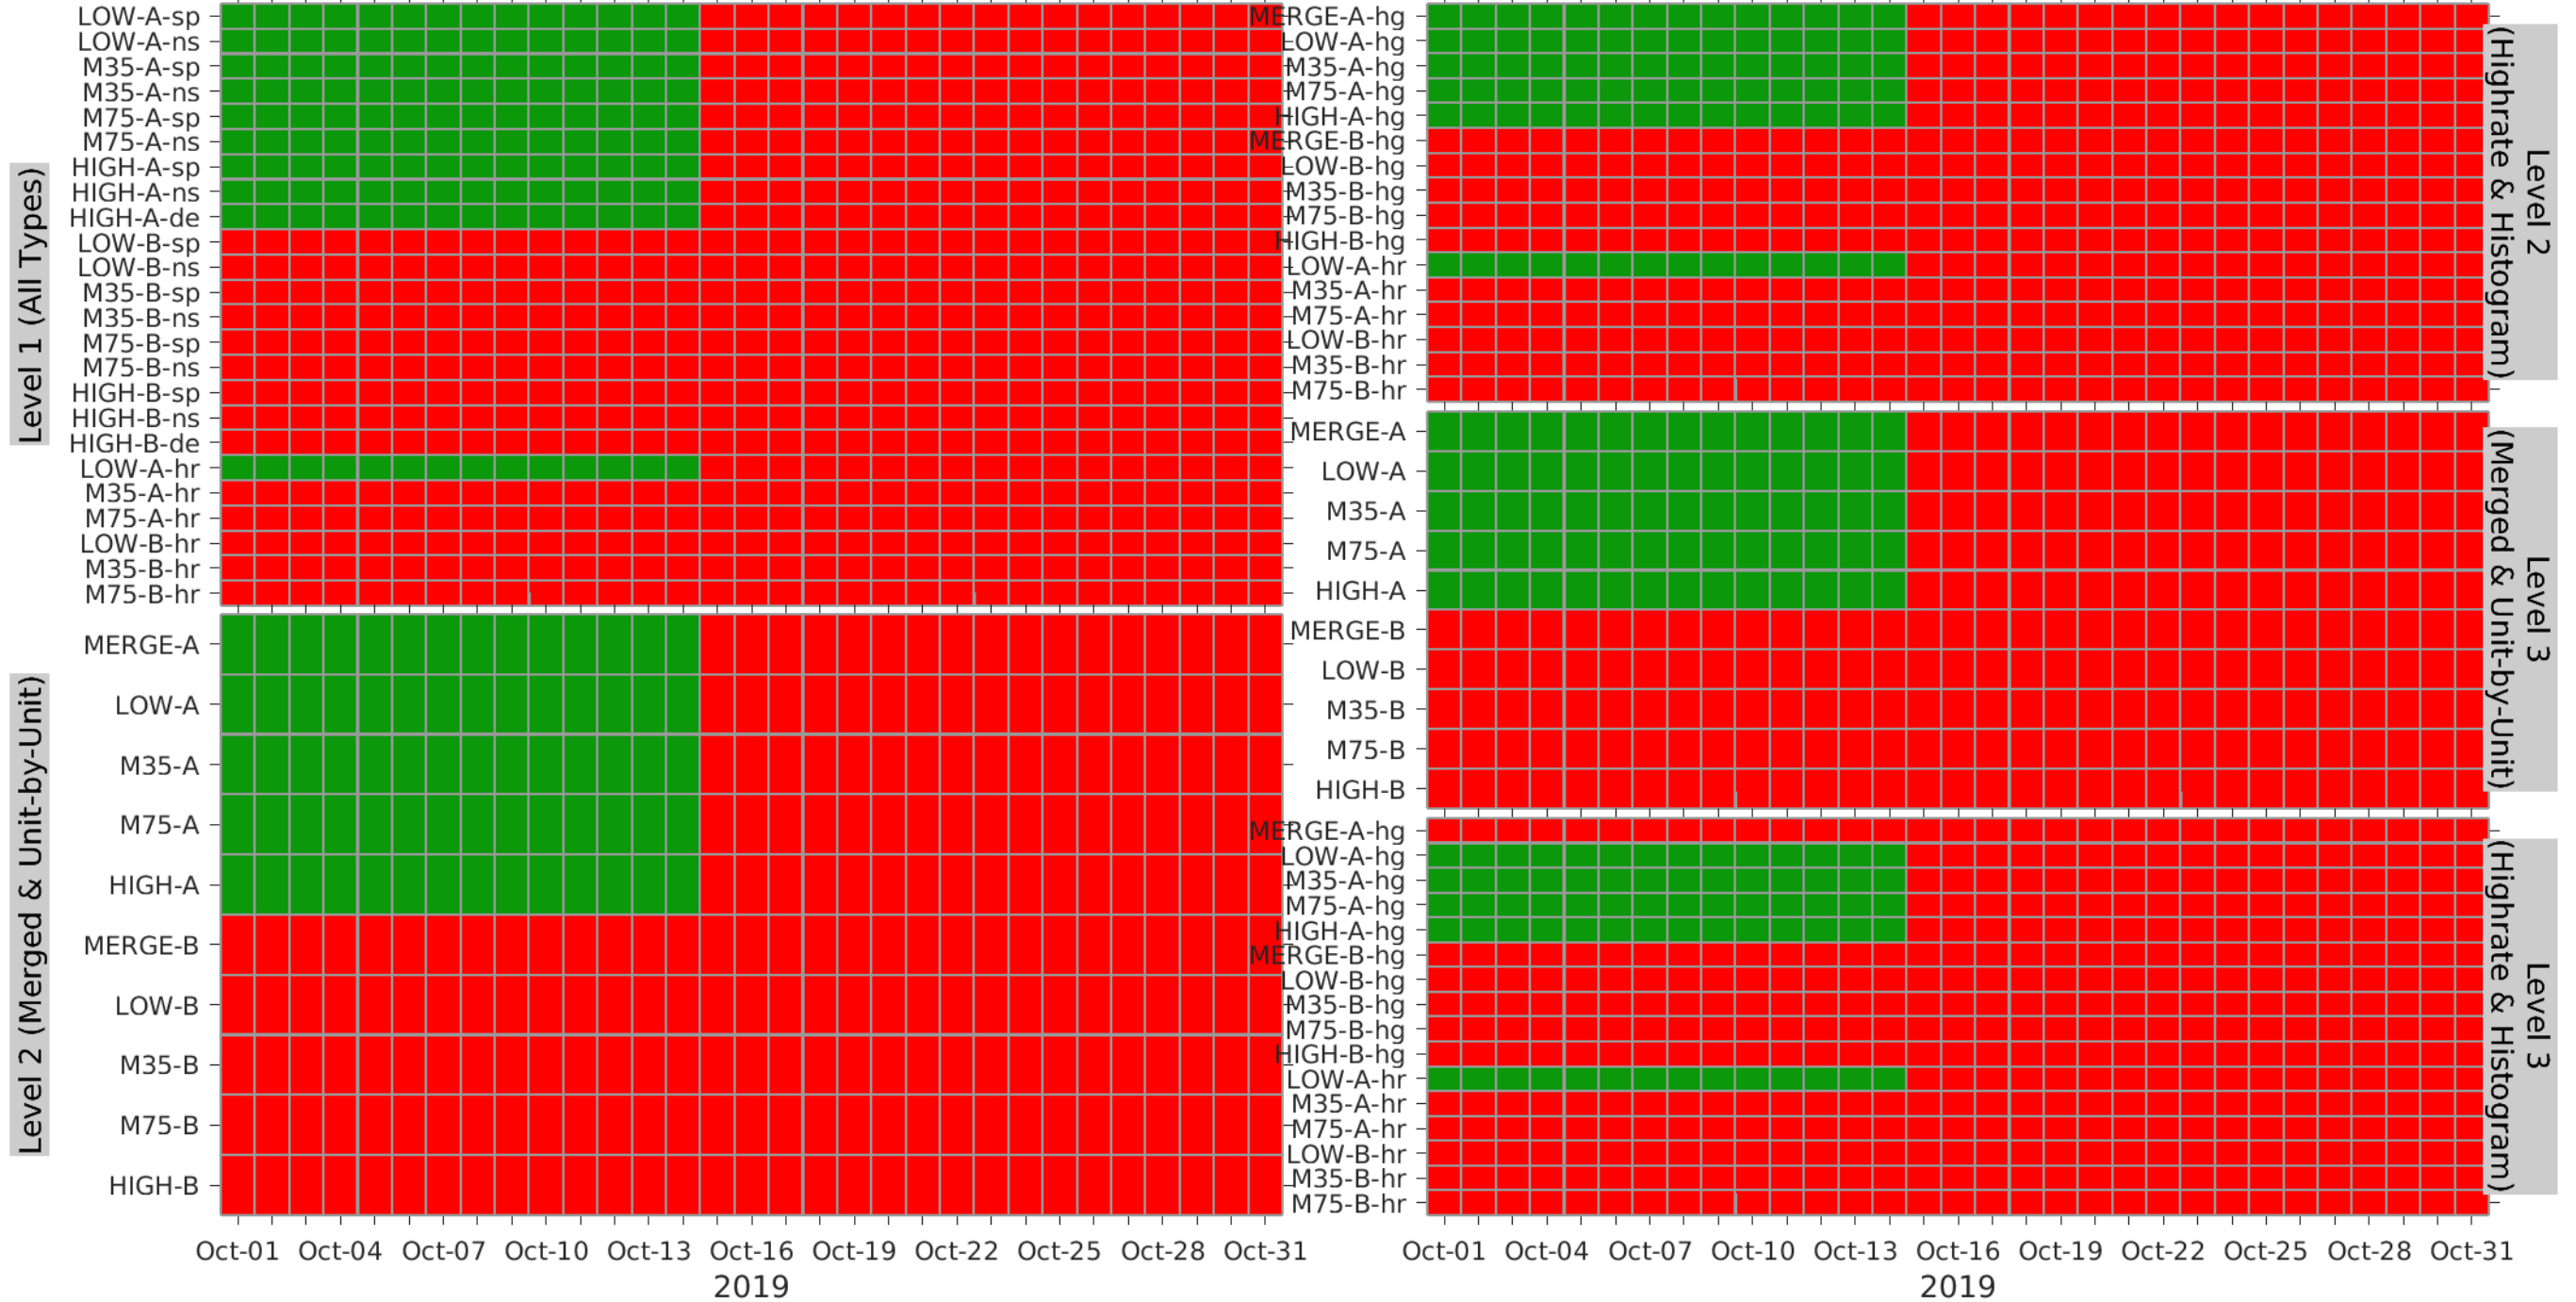

Supplement: 11214_2021_855_MOESM7_ESM.pdf [file 11214_2021_855_MOESM7_ESM.pdf]
