# Supplementary material for: The Magnetic Electron Ion Spectrometer: A Review of On-Orbit Sensor Performance, Data, Operations, and Science
Source: PubMed Central journal article supplement (PMC8553741; doi:10.1007/s11214-021-00855-2), 2021-10-28
Supplement: 11214_2021_855_MOESM1_ESM.pdf [file 11214_2021_855_MOESM1_ESM.pdf]

1 Electronic Supplementary Material for *The Magnetic Electron Ion*  
2 *Spectrometer: A Review of On-Orbit Sensor Performance,*  
3 *Data, Operations, and Science*

4 S. G. Claudepierre, J. B. Blake, A. J. Boyd, J. H. Clemmons,  
5 J. F. Fennell, C. Gabrielse, M. D. Looper, J. E. Mazur, T. P. O'Brien,  
6 G. D. Reeves, J. L. Roeder, H. E. Spence, and D. L. Turner

7 October 26, 2021

8 **1 Introduction**

9 This document provides additional supporting information and material relevant to the topics presented in  
10 the main manuscript. Sect. 2 provides further details on a number of the “Data Caveats” described in the  
11 manuscript. MagEIS lookup table (LUT) changes are documented here (Sect. 2.3) for all 8 units and all LUT  
12 types (main rate, histogram, and high rate). The descriptions of several of the data products introduced in  
13 the manuscript are expanded upon in Sect. 3, including the conversion of histogram data to flux. In Sect. 4,  
14 we discuss several points related to how LUT and instrument configuration changes impacted the calibration  
15 factors. Sect. 5 examines the MagEIS electron spectrometer’s angular response as simulated by Geant4. In  
16 Sect. 6, we provide additional details on the scaling of the chamber magnetic field that was necessary to  
17 bring the Geant4 simulations into alignment with the flight histogram data. Finally, Sect. 7 describes the  
18 contents and variables in the level 2 and level 3 MagEIS data files.

19 In addition to the information provided in the sections below in this document, the following documents  
20 are also provided as part of the Electronic Supplementary Material:

- 21 1. Tables of the calibration factors for all of the LUTs used on orbit (see Sect. 2.3) for the electron  
22 main rates, electron histograms, electron high rates, and ion main rates. A few additional details are  
23 provided in Sect. 4.
- 24 2. Figures indicating the instrument mode (e.g., science, high-rate, or maintenance mode) for all 8 units  
25 over the course of the mission. Note that these summary plots can be scanned, for example, to look  
26 for instances of high-rate mode data taken continuously over multiple days. Each page in the PDF  
27 displays one month of data so that there are 86 pages in the document.
- 28 3. Figures indicating the availability of the daily MagEIS CDF data files (levels 1, 2, and 3) for the entire  
29 mission. The plots are presented in stoplight red/green format, where green indicates that the data  
30 file exists, and red indicates that it does not. Each page in the PDF displays one month of files so that  
31 there are 86 pages in the document.
- 32 4. A chronological listing of configuration changes (e.g., LUT changes, accumulation parameter changes)  
33 and known instrumental/spacecraft issues that led to missing data files and/or large data gaps.

34 **2 Data Caveats**

35 **2.1 Noise in LOW/MED Pixels 0 and 1**

36 As described in the main manuscript, pixels 0 (P0) and 1 (P1) on the LOW/MED units experienced noise.  
37 Figure 1 shows  $L$  sorted plots of P0 data from all six LOW/MED units, analogous to the plot for P1 data

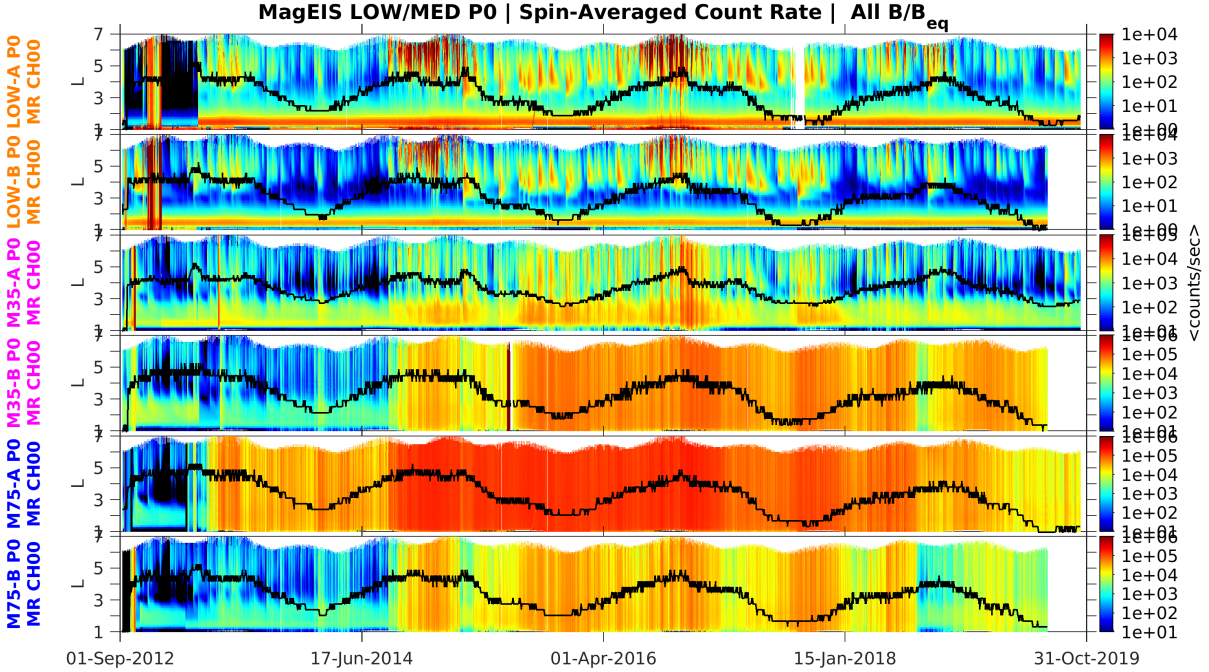

Figure 1: Noise in LOW/MED P0. The raw, spin-averaged count rates are daily-averaged and binned in  $L$ . The daily maximum yoke temperature is overplotted in black, where the units are arbitrarily scaled to the  $L$  range of the plot window (the peak-to-peak range is  $\sim 5^\circ \text{C}$ ).

38 shown in the main manuscript. We note that P0 was partially shielded and was intended to serve as a  
 39 background monitor, so that it did not provide scientifically useful electron fluxes irrespective of any noise  
 40 considerations.

## 41 2.2 Major Changes in HIGH Electron Spectrometer Logic

42 Table 1 lists the major changes and reconfigurations of the HIGH unit, along with intervals where thermal  
 43 oscillations were observed. The significance of these points is described in the main manuscript. The end  
 44 user should be aware of these issues with the HIGH unit electron data, again emphasizing that the data  
 45 should only be used qualitatively prior to 26 Sep 2013.

## 46 2.3 Time-varying Energy Channels due to Lookup Table Uploads/Changes

47 When a new main rate LUT was uploaded or implemented on a given MagEIS unit, this changed the energy  
 48 channel definitions and flux conversion factors. We note that within a given daily CDF file, there is a fixed  
 49 set of (non time-varying) energy channels. The energy channels may change from day-to-day when new  
 50 LUTs were uploaded, but for a given day the channel definitions are fixed (e.g., the energy channel variables  
 51 are not time-varying in an individual daily file).

52 Table 2 through Table 6 list the dates and times (in UTC) of LUT table changes for the electron main  
 53 rates, electron histograms, ion main rates, ion histograms, and electron high rates. Note that the dates  
 54 and times indicated can be either the date/time of the LUT upload or the date/time of a table switch, or  
 55 both. In Table 2 through Table 6, an entry of “NONE” indicates that there was not a LUT uploaded to the  
 56 instrument prior to that time.

57 In Table 2 through Table 6, an entry of “ENG” indicates an engineering LUT, which was used for  
 58 instrument diagnostics and did not produce science-quality data. In addition to their use early on in the  
 59 mission, these ENG tables were also often used during the test pulser calibrations performed at perigee (see  
 60 main manuscript). The following LUT IDs are of ENG type and data taken when these LUTs were in use

61 should not be considered valid: (65520, 65521, 65522, 65523, 65524, 65525, 65526, 16144, 16149, 16160,  
62 16165, 16176, 16181, 16192, 13824,13825, 13826, 65284). In addition, the following science-grade LUTs  
63 were deemed to be invalid for various reasons and science data taken with these LUTs should be discarded:  
64 (16640, 20736, 24832).

## 65 **2.4 Time-varying Sampling Parameters (Sectoring and Accumulation Times)**

66 In addition to instrument reconfigurations via LUT uploads/changes, sensor performance was also optimized  
67 on-orbit via several parameters that were configurable via ground-command. As described in the main  
68 manuscript, two of the most important were the number of spacecraft spins over which data were accumulated  
69 (nspins) and the number of angular sectors per spacecraft spin (nsectors). We emphasize that these values  
70 were changed frequently during instrument commissioning (Sep and Oct 2012) and early operations, but  
71 settled into relatively stable values as the mission progressed. We note that the pitch-angle binned data in  
72 the level 3 data products are somewhat insensitive to the sectoring changes. This is because a fixed number  
73 of pitch-angle bins are used for the entire mission, regardless of the specific sectoring on a given unit at a  
74 given time. Of course, early in the mission when the angular sectoring was coarse, some pitch angle bins  
75 may have lacked coverage relative to later times when the sector resolution increased.

## 76 **2.5 Noise in HIGH Electron Detectors**

77 As described in the main manuscript, on 02 Oct 2013 the HIGH-A magnetic electron spectrometer experi-  
78 enced a permanent failure in the MAPPER channel attached to the rear detector in the pixel 0 (P0) stack. In  
79 the  $\sim 6$  months leading up to the failure, the noise in P0's rear detector had gradually increased by nearly an  
80 order of magnitude while all other detectors remained stable. At later times in the mission, both the rear de-  
81 tector and the buried detector in the HIGH-A pixel 1 (P1) stack exhibited some noise characteristics similar  
82 to what was observed on P0 rear before it failed. However, these noise signatures were less pronounced and  
83 more transient relative to that of P0 rear and did not impact the quality of the science data from HIGH-A  
84 P1. Since the buried detectors were not used, HIGH-A P1 buried was disabled (threshold raise) by ground  
85 command in Nov 2017. HIGH-A P1 rear began to exhibit noise signatures in the detector singles data in  
86 Jul 2017, which was monitored until the end of the mission. However, this noise was transient, at times  
87 going away completely, and did not steadily increase with time as was the case for HIGH-A P0 rear before  
88 it failed. More importantly, the noise in HIGH-A P1 rear was less severe than that in P0 rear and was not  
89 observed in the front+rear coincidence data, so that the impact on the science data was minimal.

## 90 **2.6 High-Rate Data Issue With Maximum Sectoring (2048 Sectors)**

91 In Oct 2015, we commanded the M35-A and M35-B units into high-rate (HR) mode with the maximum  
92 possible sectoring of 2048 sectors per spin. Upon analyzing the data, it was determined that there was a  
93 timing issue when the maximum possible sectoring was used. Specifically, we determined that there was  
94 double counting (twice the true number of counts) in the first 10s of sectors in each spin. This was due to  
95 a mismatch between the actual sector time and that was computed in the flight software, which was coarse  
96 due to the 1/4 msec time resolution on the sector time.

97 For example, with an assumed spin rate of 5.481 RPM (a 10.947 sec spin period) and 2048 sectors (the  
98 parameters on Probe B in Oct 2015), the true sector time is  $\sim 5.35$  msec, which is resolved by the flight  
99 software to be 5.25 msec due to the 1/4 msec time resolution. Thus, the spin period computed by the flight  
100 software for the next spin is 10.752 sec ( $5.25 \text{ msec} \times 2048$ ). This mismatch between the true spin period  
101 and that computed by the flight software leads to 195 msec of rollover at the end of each spin, resulting in  
102 double counting in the first  $\sim 37$  sectors of the next spin ( $37 \approx 195/5.25$ ). A similar analysis for M35 on  
103 Probe-A, where the where spin rate was  $\sim 5.4$  RPM, showed 68 bad sectors at the beginning of each spin.  
104 Thus, we analyzed the spin rates for both Probes in the Sep-Oct 2015 time frame to determine that the  
105 minimum spin rate was 5.385 msec (Probe A). In this case, there are 390 msec of bad sectors, or  $\sim 75$  bad  
106 sectors. To allow for this worst case, the M35 sectoring was lowered from 2048 to 1960 sectors to mitigate  
107 this timing issue, allowing for some margin. We note that there were  $\sim 10$  days in Oct 2015 where the M35  
108 sectoring was set to 2048 before it was lowered to 1960, so that the end user should be aware of this issue

109 if analyzing data from this time interval. When the sectoring was set to 2048, the data from the first 100  
110 sectors in each spin is set to fill value.

111 This timing mismatch was not an issue for the main rate data, which had a maximum possible sectoring  
112 of 64 sectors per spin. This is because the maximum possible duration of the rollover due to the 1/4 msec  
113 time resolution ( $\sim 16$  msec) was much less than the duration of the sector time ( $\sim 171$  msec), for 64 sectors  
114 and nominal values of the spin period.

## 115 2.7 Noise and Efficiency-of-Detection Issues in Proton Channels

116 Figure 2 illustrates the development of the noise and efficiency-of-detection issues in the MagEIS MPA proton  
117 data on both Probes. Prior to mid-2013, the detectors were producing valid data, which can be seen most  
118 clearly in the inset panels. In mid-2013, the lowest 5 or 6 energy channels began to display noise, while  
119 the higher-energy channels began to gradually decline in intensity. By the end of the mission, the count  
120 rates in the highest energy channels had decreased by roughly 3 orders of magnitude. Note that the count  
121 rate in the lowest energy channel was initially different in the inner and outer zone (black vs. red), but  
122 then reached the same value, indicating noise development. The two inner zone traces (black and grey) in  
123 particular suggest that the issue was instrumental. In the inner zone, the MPA proton measurement was  
124 largely dominated by inner belt proton contamination. As the very energetic inner belt protons that cause  
125 this contamination were relatively steady over the time scale displayed, one would expect these count-rate  
126 profiles to be relatively constant in time throughout the mission. They were at first, but the lowest energy  
127 channel (black) then began to display noise in mid-2013, while at the same time the highest energy channel  
128 (grey) began to decrease precipitously, falling by nearly 3 orders of magnitude in count rate by the end of  
129 the interval. Both of these issues were suspected to be related to ion implant damage in the from MPA  
130 detector, as described in the main manuscript. Figure 3 illustrates these same issues on the MPA detector  
131 in Probe B relative to complementary measurements from the RBSPICE instrument on Probe B.

## 132 2.8 Light Contamination in the Ion Telescopes

133 The MPA detectors in the ion telescopes were subject to considerable light contamination when they viewed  
134 the sunlit Earth (see main manuscript). Figure 4 shows an example of this contamination in the sector-  
135 resolved level 2 data, along with the level 3 data where a mask has been applied.

## 136 2.9 Eclipse Effects

137 We now expand on the timing effects experienced in eclipse that were described briefly in the main manuscript.  
138 Such effects are illustrated in Figure 5 for the LOW-A unit, though all MagEIS units, including the ion tele-  
139 scopes, are subject to these timing issues in and around eclipse. Panel (a) shows the angular distribution  
140 (in local pitch angle) of 54 keV electron flux plotted versus time during a pass through the inner zone down  
141 towards perigee, which is at the far right of the panel. Note that once the spacecraft enters eclipse, the flux  
142 appears to change rapidly and periodically at very low pitch angle ( $\alpha_L \approx 5^\circ$ ). Panel (b) shows this effect  
143 in time series format for the lowest two pitch-angle bins and panel (c) shows it in an energy spectrogram in  
144 the lowest pitch-angle bin, indicating that that the effect occurs in all energy channels.

145 To emphasize that these effects are non-physical and related to binning and timing effects in eclipse, we  
146 also show the “unbinned” pitch-angle data, where the center of each angular sector is assigned an instan-  
147 taneous pitch angle. Panel (d) shows angular distributions for two consecutive spins in eclipse using the  
148 unbinned data. The two distributions lie nearly on top of one another and are virtually indistinguishable,  
149 indicating that the angular distribution has not evolved significantly over the  $\sim 22$  s accumulation interval.  
150 Despite this, the binned time series shown in panels (a)-(c) at  $\alpha_L = 8.2^\circ$  suggest that the flux changes rapidly  
151 between these two spins. This binning effect can be seen in panel (e) where a zoom in of the  $\alpha_L = [0^\circ, 35^\circ]$   
152 range is shown, which encompasses the first two pitch angle bins in the binned data. Four additional points  
153 are shown with X’s, where the value of the binned flux is marked at the center of each of the two pitch  
154 angle bins. Note that the unbinned fluxes near  $\alpha_L = 16^\circ$  straddle the bin boundary, with the flux from the  
155 first spin (07:20:10) belonging to bin 0, but the flux from the next spin (07:20:21) belonging to bin 1. The  
156 influence that this has on the binned data is clear: In the first spin, the binned flux in bin 0 is the average

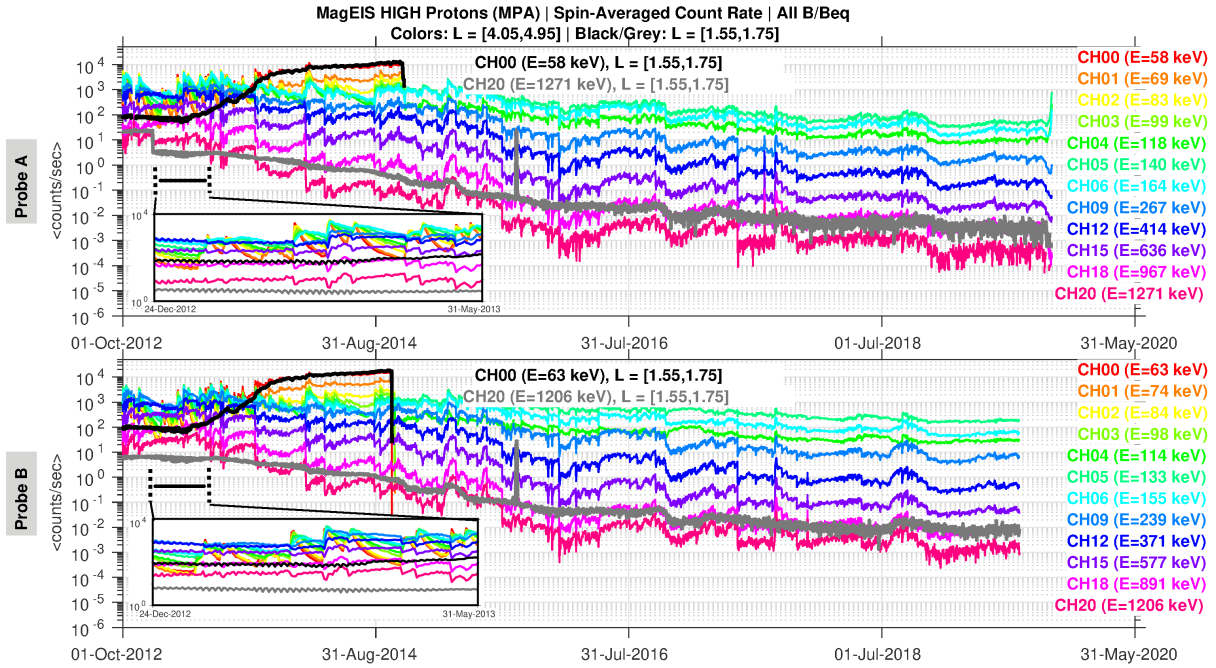

Figure 2: Development of noise and decrease in efficiency-of-detection in the MagEIS front MPA detectors in the ion telescopes on both Probes. Spin-averaged fluxes, averaged between  $L = 4-5$ , are shown in color for a subset of energy channels between  $\sim 60$  keV and  $\sim 1.3$  MeV. The black and grey traces show the lowest and highest energy channels ( $\sim 60$  keV and  $\sim 1.3$  MeV) averaged in the inner zone ( $L = 1.5-1.8$ ) where the measurement is dominated by background contamination. Portions of the spacecraft spin where the telescopes were subject to light contamination have been removed before the spin-averaging. The inset panels show a zoom of the early time interval when the detectors were not noisy and producing valid data. The detectors thresholds were raised in Oct 2014 to zero out the six lowest-energy channels. Note that the step-function decrease very early in the time interval in the grey line for Probe A (top) was due to a LUT change.

Van Allen Probe B | Spin-Averaged Fluxes | Daily Average in L=[3.8,4.2]

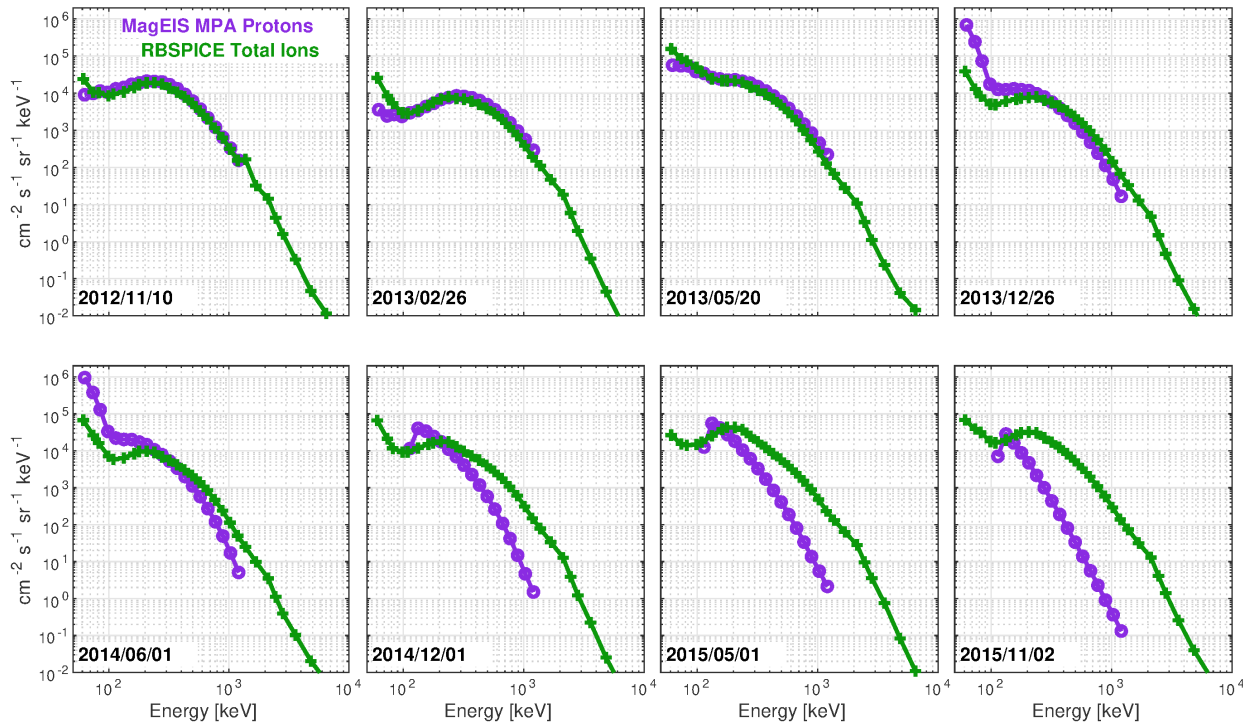

Figure 3: Development of noise and decrease in efficiency-of-detection in the MagEIS front MPA detector, here illustrated for the ion telescope on Probe B. The MagEIS data are compared with a complementary measurement from the Van Allen Probe’s RBSPICE instrument. The two agreed well until late 2013 after which time considerable noise developed in the lower energy MagEIS channels; these channels were zeroed out by raising the detector threshold in Oct 2014. Note also that at the higher energies, the MagEIS fluxes were reduced relative to RBSPICE, a discrepancy that increased over time.

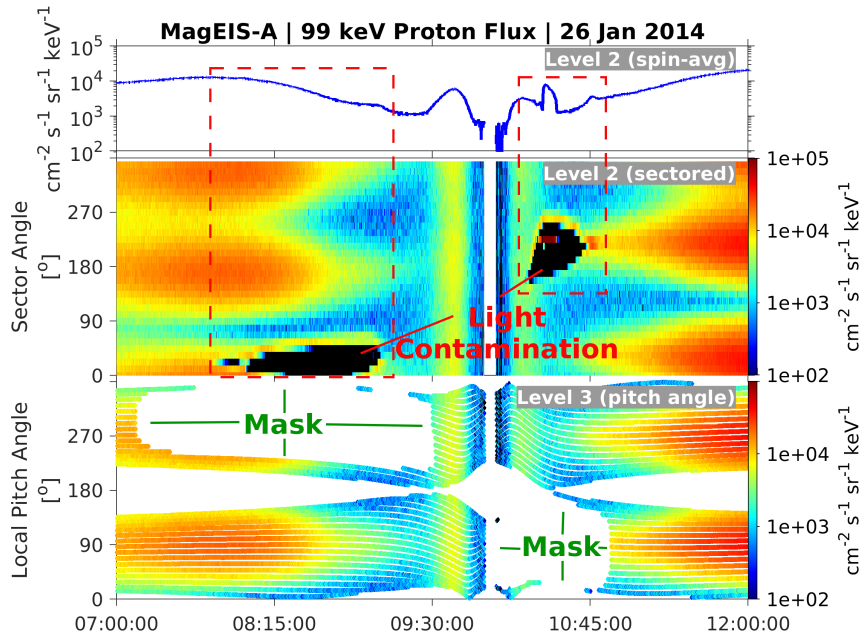

Figure 4: Example of light contamination in the 100 keV proton channel from the front (MPA) detector in the ion telescope on Probe-A. The top panel shows level 2 spin-averaged flux through perigee ( $\sim 10:00$ ). The time interval indicated by the red boxes shows light contamination effects in the spin-averaged data. The second panel shows the level 2 angular distribution with the light contamination indicated as regions of 0 counts. The bottom panel shows the level 3 angular distribution where a mask has been applied to remove the portions of the spin that contain light contamination.

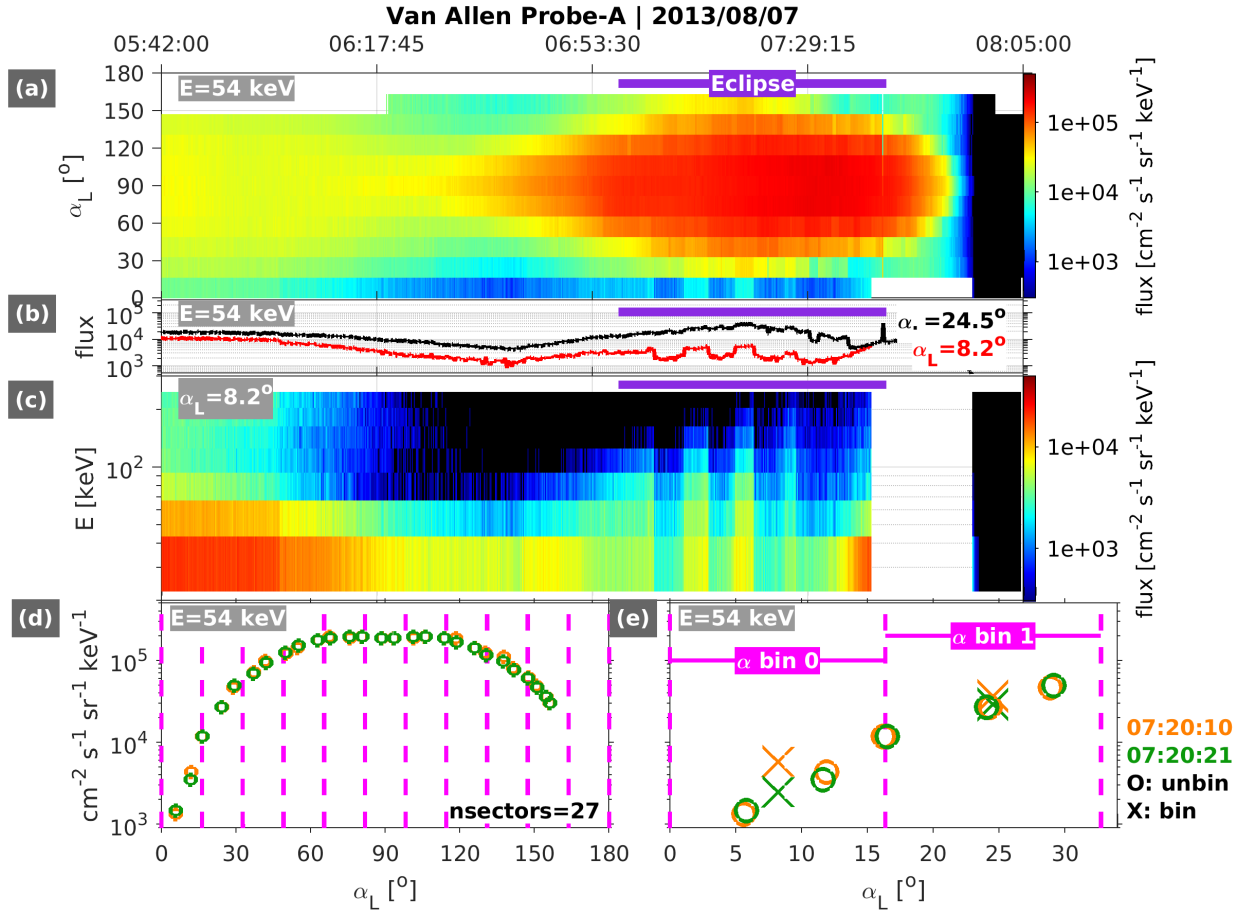

Figure 5: Van Allen Probe A pass through the inner belt down towards perigee, highlighting the impact that eclipse intervals (purple) have on the data. In panels (a)-(c), the data presented have been binned in local pitch angle ( $\alpha_L$ ). Note the rapid changes in flux that occur in the  $\alpha=8.2^\circ$  bin during eclipse. These are non-physical artifacts that arise due to timing errors when the spacecraft are in eclipse. Panel (d) shows unbinned angular distributions for two consecutive spacecraft spins and panel (e) shows a zoomed-in version of panel (d). In panel (e), the binned data are also shown in each bin, for comparison.



157 of 3 unbinned values, while in the second spin, it is the average only two binned values, hence the factor of  
158  $\sim 5$  difference in the binned flux values in bin 0 between the two consecutive spins, despite the fact that the  
159 underlying (e.g., unbinned) angular distribution has not changed significantly between the two spins.

160 To mitigate this effect, end users can linearly interpolate (in logarithmic space) the unbinned data to a  
161 finer angular resolution before binning. We note that this issue is also mitigated when the MagEIS sectoring  
162 increased to larger values. The issue occurs in all pitch-angle bins, but is most apparent in the near-parallel  
163 bins ( $\alpha_L \approx 0^\circ, 180^\circ$ ), since the flux gradient is usually very steep there. We note that this is a generic  
164 problem with pitch angle binning that perhaps goes unnoticed unless explicitly accounted for and corrected.  
165 It may impact the other particle measurements on the Van Allen Probes, if their angular sampling is too  
166 coarse.

167 A related effect occurs during eclipse exits, which are particularly prone to errors due to the abrupt  
168 change and mismatch between the true and assumed spin period. The spacecraft spins up in eclipse and the  
169 spin period decreases, while at the same time the MagEIS sensor is using an internally generated sun pulse  
170 at a fixed period. When the vehicle exits eclipse into sunlight, the MagEIS system re-syncs to the true sun  
171 pulse and the spin period rapidly returns to normal, but not immediately. This produces a short interval of  
172 changing spin periods until the vehicle settles out. Thus, the last spin before eclipse exit is ended abruptly  
173 and a new spin begins, which can produce spikes and other artifacts in flux in the times surrounding eclipse  
174 exit. This phase shift accumulation effect can be noted as “blips” in flux at eclipse exit in panels (a) and  
175 (b) in Figure 5. Van Allen Probe eclipse entrance/exit times are provided by the EMFISIS team and are  
176 available in their data archive.

## 177 2.10 Livetime Data

178 There are several caveats regarding the livetime data of which the end user should be aware. For example,  
179 the eclipse effects described in Sect. 2.9 can also influence the livetime values when the spacecraft enter/exit  
180 and are in eclipse. When the spin pulse re-syncs with that computed by the flight software at eclipse exit,  
181 spurious livetime values are reported (e.g., 0%, >200%). When such values are encountered in the ground  
182 data processing software, they are assumed to indicate a timing problem and fluxes are set to fill values in  
183 such instances.

184 Another caveat is the forced deadtime at the beginning of each spin caused by the readouts of the data  
185 from the hardware. For the LOW/MED units, there are 13 msec of deadtime at the beginning of every spin,  
186 while for HIGH it is 6 msec. For normal science mode data (e.g., main rate, histograms) this forced deadtime  
187 always occurs in the first sector for nominal values of the spin period (i.e., the minimum possible sector time  
188 is  $\sim 172$  msec = 11 sec / 64 sectors). However, for the high rate data with a large number of sectors (e.g.,  
189 1000), this deadtime can be comparable to or exceed the sector time of the first sector. In either case, it  
190 must be accounted for when using the livetime data to correct the rates. In the MagEIS data processing,  
191 this “short sector” correction is accounted for in the level 1 to level 2 processing; the livetimes reported in  
192 the level 1 data files do not account for this effect.

193 An additional caveat on the livetime data is an issue with the flight software when the maximum possible  
194 sectoring is used for the livetime data (64 sectors). In this case, there is rollover in the livetime counts similar  
195 to the count rollover described in Sect. 2.6 for the high-rate data when the maximum possible sectoring is  
196 used. Because the spin pulse and sectoring are accurate only to 1/4 msec, the last sector in each spin can be  
197 either longer or shorter than the true sector time, depending on the preciseness of the spin period. When this  
198 occurs, any extra livetime is written to the following sector, so that when there are 64 sectors, the counter  
199 rolls over and all extra livetime is written to sector 0 of the next spin. Compression error can also influence  
200 and enhance this effect. To mitigate this issue in the ground data processing, we replace the livetime in  
201 sector 0 with the livetime from sector 1 when 64 sectors are used.

## 202 2.11 Calibration Test Pulsar Sweeps

203 For much of the mission, the calibration pulser in the MagEIS magnetic spectrometers was run at perigee  
204 nearly every orbit using a specialized “engineering” LUT. Perigee was chosen since, on the majority of passes,  
205 the Van Allen Probes were below the radiation belts there. Test pulser runs introduced non-physical features  
206 into the measurements taken in the  $\sim 5$  minutes around perigee when the pulser was active and thus fluxes

207 at/near perigee should generally be ignored. The level 1 to level 2 processing sets the fluxes to fill when the  
 208 pulsar is on, but there may be artifacts that are not completely removed. The test pulsar calibrations were  
 209 quite useful for tracking sensor performance but were used excessively in the early years. Thus, on 01 Nov  
 210 2017 the cadence of the calibration pulsar operations at perigee was reduced to once per month (on the 1<sup>st</sup>  
 211 orbit of the month) to allow electron data to be taken at most perigees.

## 212 3 Further Details on Data Products

### 213 3.1 Electron Histogram Data

214 As described in the main manuscript, the electron histogram data provided an invaluable measure of back-  
 215 ground contamination in each pixel. The figure presented in the manuscript was for M75-A histogram data.  
 216 Figure 6 presents an analogous set of histogram plots for all 8 electron spectrometer units. There are several  
 217 features to note. We see that P8 in the LOW/MED units does not have a “right wing” so that background  
 218 corrections using the algorithm described in the main manuscript are not possible on these pixels. Similarly,  
 219 P2 for the LOW/MED units has very little “left wing” for several of the units, impacting the quality of the  
 220 background corrections for P2. In these cases, the background is estimated solely from the right wing level,  
 221 which is generally an underestimate of the true background level in the main channel passband. We also call  
 222 attention the “bump” just below the passband in P8 on both M35 units. The reason for this is unknown  
 223 but was a persistent feature of the M35 units; note that such a feature is not seen in the same energy pixels  
 224 on the M75.

225 There are two important points regarding the histogram data and how it is used in the level 1 to level  
 226 2 processing for background corrections. First, the histogram count rates provided in the level 1 files are in  
 227 units of counts per second per histogram channel. To properly use these rates in processing and analysis,  
 228 they must be recast in counts per second per PHA channel using the histogram LUT. Second, because both  
 229 main rate LUTs and histogram LUTs were used to organize the data in-flight, it was necessary to use them  
 230 together when processing the main rate and histogram simultaneously (e.g., when using the histograms to  
 231 do background corrections on the main rates). Thus, the processing required a unique set of background-  
 232 correction parameters (e.g., left/right wings) to be defined for each different combination of main rate and  
 233 histogram LUT that was used on orbit, which complicated the processing considerably.

234 The histogram data also provided a high resolution data product, with energy channels much narrower  
 235 ( $\Delta E/E \sim 3\%$ ) than the main channels ( $\Delta E/E \sim 30\%$ ). Like the main rate channels, we used the Geant4  
 236 simulations and bowtie machinery to obtain the calibration factors necessary to convert the histogram counts  
 237 into fluxes. However, the narrow histogram channels complicated the conversions somewhat and stressed  
 238 the limits and assumptions of the bowtie analysis.

239 A rough overview of the procedure used is as follows. First, for each histogram LUT used on orbit, we  
 240 calculated the bowtie parameters in the same manner as described in the main manuscript for the main  
 241 channels. Next, we defined a passband region for each pixel, similar to the main channel definitions (e.g.,  
 242 Figure 6). However, these passband regions defined for the histograms were not identical to the main channel  
 243 definitions because we found it necessary in some cases to reduce the number of histogram channels selected.  
 244 This is because near the edges of the passband region, small changes in the Geant4-simulated response can  
 245 conspire with the steep gradients in the histogram counts on either side of the passband to produce artifacts  
 246 in the histogram flux spectrum. We then calculated the bowtie parameters within this histogram passband  
 247 region and converted the count rates to flux in the usual way for all histogram channels within the defined  
 248 passband. Note that because we defined a separate set of passbands for the histogram data, the conversion  
 249 of the histogram data to flux is independent of the main rate channel definitions/LUTs and main rate data  
 250 are not used in the histogram flux conversions.

251 For the histogram flux data product obtained in this manner and provided in the level 2 and level 3 files,  
 252 there are several caveats that should be considered:

253 **Energy channel centroids and bounds/widths.** For the bowtie-derived energy channel centroids,  
 254  $E_0$ , and channel bounds,  $E_{lo}$  and  $E_{hi}$ , there are several items of note. For example, occasionally there is  
 255 a repeated  $E_0$  in adjacent histogram channels, likely due to the resolution of the grid used in the Geant4  
 256 simulation. When this occurs, we construct a linear fit to the bowtie-derived  $E_0$ ’s within the passband and  
 257 relabel the  $E_0$ ’s using the fitted channels. We note that this relabeling results in only a small change to the

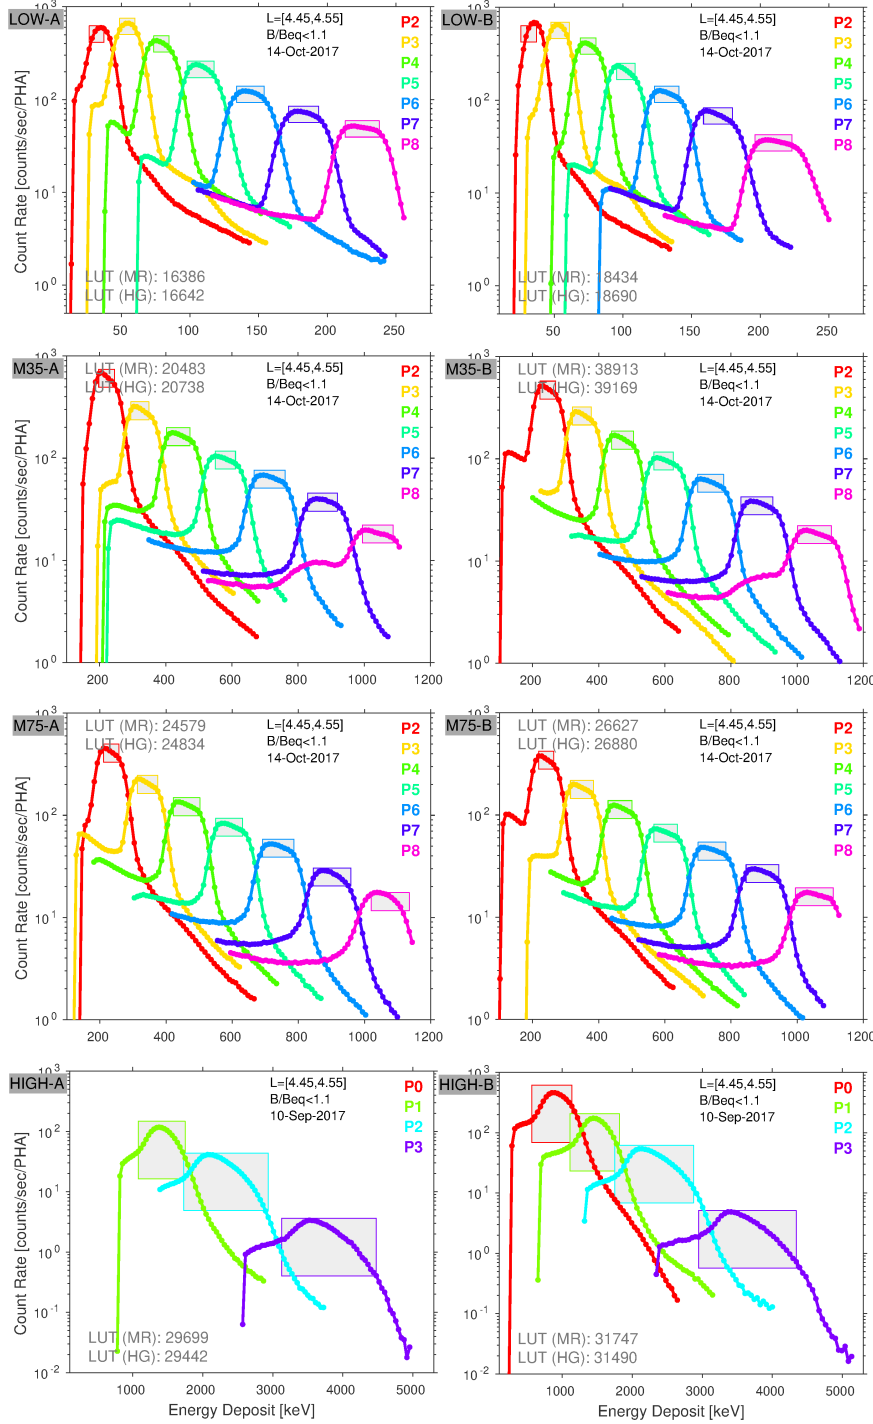

Figure 6: MagEIS histogram data from all 8 electron spectrometer units. The LOW/MED data were obtained on 14 Oct 2017 and the HIGH unit data were obtained on 10 Sep 2017. All data displayed are spin-averaged histogram count rates averaged between  $L = [4.45, 4.55]$  near the magnetic equator ( $B/B_{eq} < 1.1$ ) over the indicated day. The main channel passband widths are shown for each pixel for the indicated LUTs (the height of the rectangles is arbitrary). Note that these main passbands are those defined by the MR LUT in PHA 0-255 space, mapped into histogram channel space using the HG LUT, and then converted to energy deposit via the gain and offset for each pixel; they are not the channel widths,  $\Delta E$ , obtained from the Geant4/bowtie analysis.

258  $E_0$  values ( $<1\%$ ) and is done to avoid repeated energy channels. In addition, the Geant4/bowtie analysis  
 259 sometimes results in  $E_0$  values that are the same as  $E_{hi}$ . This is a feature of the narrow histogram channel  
 260 response, where the large out-of-band response at higher energies “pulls”  $E_0$  towards the higher-energy  
 261 edge. An extreme case arises when the bowtie produces an  $E_0$  that is strictly greater than  $E_{hi}$ . When this  
 262 pathological case is encountered, we adjust  $E_{lo}$  and  $E_{hi}$  by setting  $E_{hi} = E_0$  and then adjust  $E_{lo}$  to preserve  
 263 the  $\Delta E$  (full-width at half-max) obtained from the bowtie analysis. In either of these scenarios, if one desires  
 264 an  $E_0$  that lies at the center of the  $\Delta E$  or one that is strictly bounded by  $E_{lo}$  and  $E_{hi}$ , then  $E_0$  can be  
 265 relabeled to the arithmetic mean,  $0.5(E_{lo} + E_{hi})$ , or geometric mean,  $\sqrt{E_{lo} \cdot E_{hi}}$ .

266 **Time cadence/averaging in the merged level 2 and level 3 files.** As noted in the main manuscript,  
 267 the histogram data were typically output at a coarser time resolution than the main rate channels. Beginning  
 268 in June 2014, the histogram data were accumulated over two spacecraft spins ( $\sim 22$  s) for the duration of  
 269 the mission, with a coarser time resolution used prior to this time (see Table 1 in the main manuscript).  
 270 An unfortunate consequence of this multi-spin accumulation for the histograms was that the histogram data  
 271 from different units could be out of phase in time. Because of this, the merged level 2 and level 3 histogram  
 272 flux data products are averaged into 2-min time bins. We note that there is no time averaging in the unit-  
 273 by-unit level 2 and level 3 histogram data files, where the fluxes are retained at their native time cadence.  
 274 This time averaging also helps in boosting the counting statistics for the histogram data, which are generally  
 275 worse than the main rate channels due to the narrower energy channels.

276 **Background corrections.** The histogram data were corrected for background contamination in a  
 277 manner analogous to that used for the main channels, where the procedure described in the Appendix  
 278 of Claudepierre et al. (2015) was modified and tailored to the histogram data. One item of note is that  
 279 we explored the influence that background subtractions have on the Geant4/bowtie-derived response since  
 280 background removal is expected to change the response. This effect is also expected to be more pronounced  
 281 for the narrow histogram channels and thus may result in appreciable differences in the calibration factors  
 282 relative to those obtained for uncorrected data. Specifically, we examined the total response of each pixel  
 283 based on the PHA channels (energy deposits) to define a background-subtracted response. We determined  
 284 the incident energy passband for each pixel by calculating the isotropic response from the “hybrid” response  
 285 function, integrated over all PHA channels. We then zeroed out the response everywhere outside of this  
 286 passband region and computed the bowtie parameters. We found that the bowtie-derived calibration factors  
 287 (e.g.,  $E_0$ ,  $G_0 dE$ ) from these “clipped” responses did not differ significantly from those obtained without  
 288 accounting for background removal (the differences were typically  $\sim 5\%$  or less). Very often the errors from  
 289 counting statistics are much larger than this and we felt it could be confusing for the end user to provide  
 290 different energy channel definitions for the uncorrected and background-corrected data products. Thus, we  
 291 chose to accept this level of discrepancy and used the same calibration factors for both the uncorrected and  
 292 background-corrected histogram flux conversions.

293 **Issues related to detector biasing.** The histogram data were more sensitive to changes in the bias  
 294 settings than the main channels. For this reason, when a unit was in the low-bias state, the histogram fluxes  
 295 are not reported in the level 2 and level 3 data files (for example, between 02 Oct 2012 and 20 Dec 2012 for  
 296 the M35-A unit). The time intervals when the units were in the low-bias state are provided in Table 7 and  
 297 Table 8. In addition, when the M75-A unit was biased with the very high bias setting early in the mission  
 298 ( $\sim 400$  V - see Figure 2 in the main manuscript), the histogram data were rendered inaccurate. Thus, there  
 299 are no histogram fluxes from this unit before 14 Dec 2012, after which time the bias was lowered to the  
 300 nominal level of  $\sim 200$  V.

301 **Unknown issue on HIGH-A, pixel 1.** There was an unknown issue with the bowtie-derived flux  
 302 conversion factors for pixel 1 on the HIGH-A unit when the histogram data were recorded with LUT 29442  
 303 prior to 02 Jul 2013. The quality of the histogram flux data from this pixel is greatly reduced prior to this  
 304 time and should only be used qualitatively.

### 305 3.2 HIGH Unit Electron Direct Event Data

306 The MagEIS HIGH unit electron spectrometers provided additional data products beyond the standard  
 307 science-mode products (main rates, livetimes, and histograms), as described in the main manuscript. The  
 308 HIGH unit “direct event” data were used extensively in early operations to optimize sensor performance,  
 309 especially to adjust the threshold settings (e.g., Table 1). These event data consisted of the PHA channel

310 registered in each count event, with a hard maximum of 8 events per sector for each sector in a spin. That  
311 is, if an event was registered within the coincidence window in both the front and rear detectors in a pixel  
312 stack, the PHA channel for that event was recorded for each detector. Due to telemetry constraints, only  
313 the last 8 events in each sector were retained, so that it is not possible to compute the true count rate (or  
314 flux) from the direct event data.

315 Examples of direct event data are shown in Figure 7 before and after the threshold tunings. The impact  
316 that the threshold changes had on the sensor performance is clear. For example, in the first panel in the top  
317 row (HIGH-A, P0, 2013/07/02), one can see that the front detector threshold setting was not optimal, as  
318 it “chopped out” a large portion of the pixel response. Compare this with the second panel in the top row  
319 (HIGH-A, P0, 2013/10/01) that shows data after the threshold tunings, and we see that more of the full  
320 pixel response is captured. With regard to these threshold changes shown in Table 1, we note that there was  
321 an additional threshold change on 16 Oct 2013 on P0 rear that is not listed in the table. This is because this  
322 pixel failed on 02 Oct 2013, so that the last significant threshold change to HIGH P0 was on 26 Sep 2013.

### 323 3.3 Ion Histogram Data

324 In addition to the ion MR LUT, an additional LUT was used to produce an ion histogram data product  
325 from the telescope detectors, providing a subsampling of the full 256 PHA channel space from each of the  
326 three detectors. For a given telescope, these histogram LUTs produced 256 histogram channels total, which  
327 were allocated between the various detectors as follows. On both telescopes, the primary histogram LUTs  
328 used on orbit mapped the 256 PHA channel space for the MPA detector into 128 ion histogram channels  
329 (2-to-1 mapping). On telescope A, the 256 PHA channel space for each of the two thin rear detectors was  
330 mapped into 64 ion histogram channels each (4-to-1 mapping), giving a total of 256 ion histogram channels  
331 from the 3 detectors. On Telescope B, the 256 PHA channels from the MSD detector were mapped into  
332 128 ion histogram channels, again giving 256 total histogram channels. These specific ion histogram LUTs  
333 were the ones used primarily on orbit, though the histogram LUTs were changed more frequently than the  
334 main rate LUTs (i.e., additional LUTs were used that gave higher resolution to various detectors at various  
335 times). The ion histogram data have been useful in ongoing calibration efforts for the rear detectors, as they  
336 were not extensively calibrated pre-flight.

## 337 4 Calibration Factors: Energy Channel Definitions and Flux Con- 338 version Factors

339 The supporting documents noted in item (1) in Sect. 1 provide tables of the calibration factors for all of the  
340 LUTs described in Sect. 2.3 (electron main rate, electron histograms, electron high rate, and ion main rate).  
341 There are a few items to note:

342 **Electron Main Rate Data** In these tables, we provide the calibration factors for the merged electron  
343 main rates. The factors shown in the tables represent the values for a fixed time interval that is defined by a  
344 unique combination of three separate MR LUTs (LOW, M75, and HIGH). The tables provided represent all of  
345 the unique combinations of LOW, M75 and HIGH unit LUTs that were used throughout the mission. There  
346 is one subtle point here. The last upload of MR LUTs to the LOW, M75, and HIGH electron spectrometers  
347 occurred on 31 Mar 2013. However, the HIGH unit instrument tunings that took place between 03 Jul 2013  
348 and 26 Sep 2013 (Sect. 2.2) essentially resulted in a unique set of calibration factors each time a threshold  
349 setting changed. Since there were many such changes during this interval, the MagEIS team decided to set  
350 one fixed date within this interval (03 Aug 2013) as the “nominal” time for all of the changes, rather than  
351 have multiple different calibration factors within the interval. Thus, the HIGH unit electrons have a separate  
352 set of calibration factors from 31 Mar 2013 to 03 Aug 2013 despite there being no MR LUT changes after  
353 31 Mar 2013. Thus, the HIGH unit electron calibration factors should be considered somewhat notional  
354 and approximate from 31 Mar 2013 to 26 Sep 2013, which is the date of the final change to the HIGH unit  
355 threshold settings. We also provide the analogous set of tables for the M35 unit, which was not used in the  
356 merged product.

357 **Electron High Rate Data** The energy channels and flux conversion factors for the high-rate data were  
358 obtained solely using the Geant4/bowtie analysis described in the main manuscript (these channels were

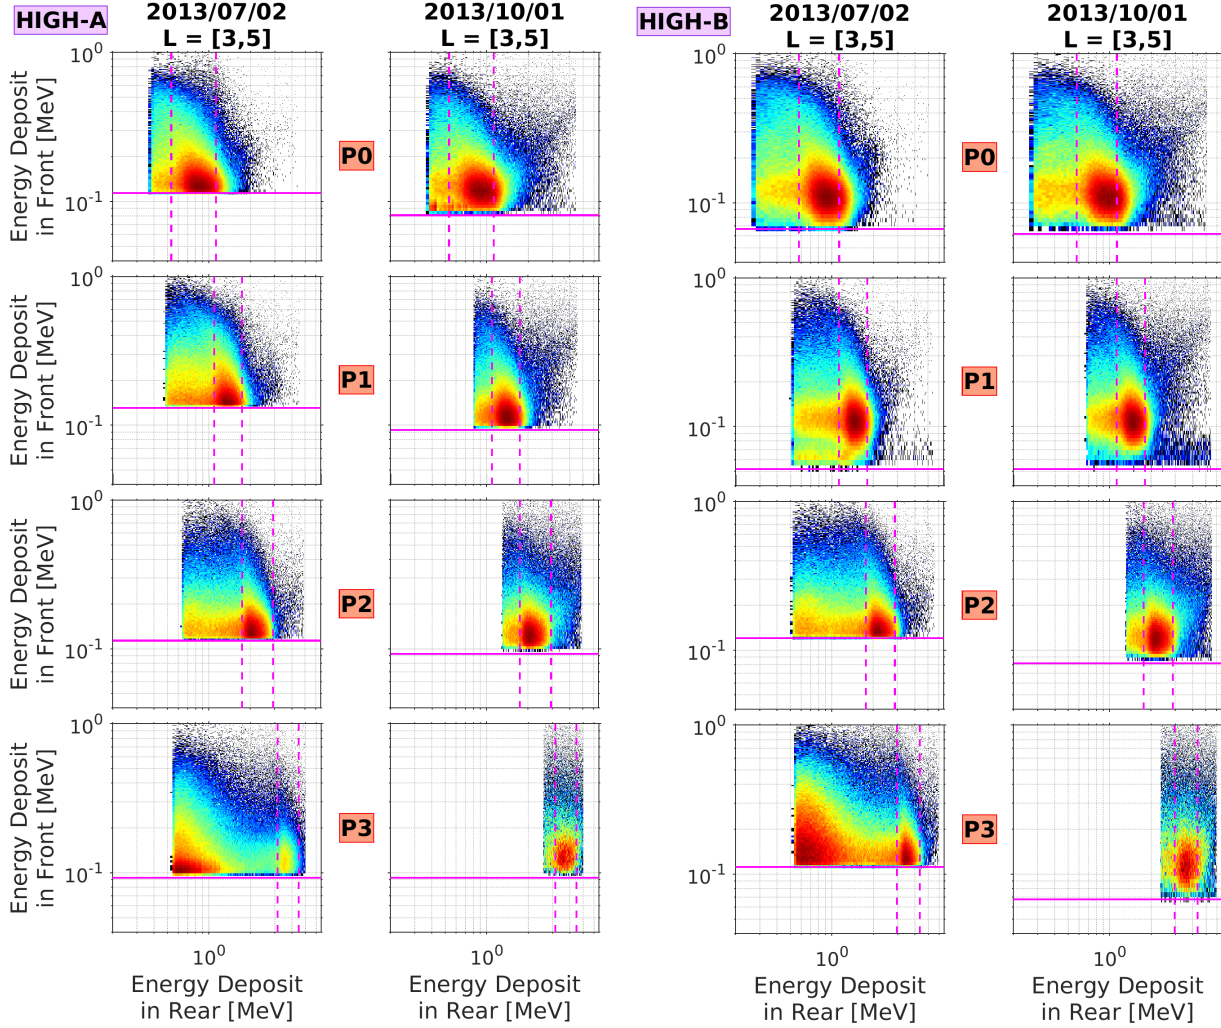

Figure 7: MagEIS HIGH unit direct event data before and after the threshold tunings. Each row corresponds to one HIGH unit pixel. The first two columns are for HIGH-A before and after the tunings, while the third and fourth columns are for HIGH-B before and after the tunings. The main channel boundaries are shown with vertical dashed magenta lines, while the front thresholds are indicated with a horizontal magenta line (rear thresholds are not indicated). We note that main channels were only defined on the rear detectors (i.e., there was no capability to define a similar main channel response region on the front detectors). The color scales are somewhat arbitrary and not shown, since the direct events can saturate during high rates. The lower value on the color scale indicates a count of 1 in a given front and rear PHA channel bin and the maximum value of the color scale is set to the maximum value within the domain.

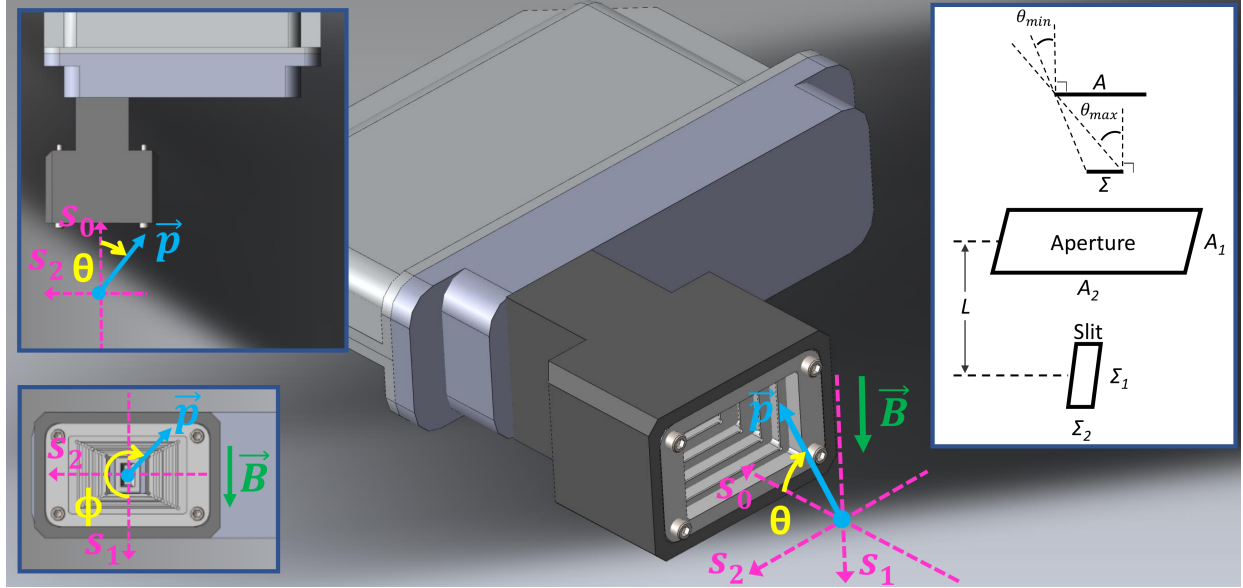

Figure 8: The sensor coordinate system,  $s_0s_1s_2$ , that is used to describe the MagEIS electron spectrometer’s angular response. The main panel and two inset panels on the left define the two angles  $\theta$  and  $\phi$  (yellow) and indicate the direction of the particle’s momentum vector,  $\vec{p}$  (cyan), and yoke magnetic field,  $\vec{B}$  (green). Note that  $\phi$  lies in the  $s_1s_2$ -plane while  $\theta$  lies in the plane that contains the  $s_0$  axis and the momentum vector. The inset panel at the right illustrates the geometry of the aperture ( $A$ ) and slit ( $\Sigma$ ) with the relevant parameters defined in Table 9. Note that in the right inset panel  $\theta$  is schematically represented in a plane (e.g., when  $\phi = 0^\circ$ ,  $\theta$  lies in the  $s_0s_1$ -plane).

359 not calibrated pre-flight). One important caveat with respect to the HR data and LUTs is that the date on  
 360 which a new LUT was uploaded (Table 6) does not necessarily mean that HR data was obtained on that  
 361 date (since the instrument had to also be commanded into HR mode). Moreover, at times, we switched back  
 362 and forth between the various HR LUTs over the course of the mission, to optimize performance. The end  
 363 user should be aware of these changes and, if needed, consult the HR LUT ID variable in the data files to  
 364 determine which LUT was used on a given day.

365 **Electron Histogram Data** Like the high rate data, the energy channels and flux conversion factors for  
 366 the electron histogram data were obtained using the Geant4/bowtie analysis described in the main manuscript  
 367 and in Sect. 3.1 above. The tables in the supporting PDF document provide the bowtie parameters for each  
 368 histogram LUT used on orbit. The histogram LUT ID number can be found in the “LUT\_ID.HG” variable  
 369 in the unit-by-unit level 2 histogram data files.

370 **Ion Main Rate Data** As described in the main manuscript, Geant4 modeling of the ion telescope  
 371 response was performed and flux conversion factors from bowtie analysis were computed for the front MPA  
 372 detectors. However, these were not significantly different from those obtained in the pre-flight lab calibra-  
 373 tions, so they were never implemented in the proton data processing. The tables provided thus show the  
 374 energy channel definitions and flux conversion factors from the pre-flight lab calibration. Note that far fewer  
 375 MR LUTs were uploaded to the ion telescopes (e.g., Table 4) compared to the electron spectrometers. During  
 376 commissioning, on 29 Sep 2012, a revised set of ion main rate LUTs were uploaded to both telescopes. For  
 377 telescope B, this ion main rate LUT was used for the remainder of the mission, while a second (and final)  
 378 ion main rate LUT was uploaded to telescope A on 31 Mar 2013.

## 379 5 MagEIS Angular Response

380 Figure 8 illustrates the sensor coordinate system,  $s_0s_1s_2$ , that is used to describe the MagEIS electron  
 381 spectrometer’s angular response. The particle’s momentum vector,  $\vec{p}$ , is resolved in this coordinate system

382 as:

$$\begin{aligned}
 p_0 &= p \cos \theta \\
 p_1 &= p \sin \theta \cos \phi \\
 p_2 &= p \sin \theta \sin \phi
 \end{aligned}
 \tag{1}$$

383 where the two angles,  $\theta$  and  $\phi$ , are defined as:

$$\begin{aligned}
 \tan \phi &= \frac{p_2}{p_1} \\
 \cos \theta &= \frac{p_0}{p}
 \end{aligned}
 \tag{2}$$

384 and the 4-quadrant arctangent (`atan2`) must be used when computing  $\phi$ . We note that as the sensor spins  
 385 with the spacecraft, the direction of sweep (the direction that the boresight vector rotates in inertial space)  
 386 is in the  $s_1$  direction.

387 The inset panel at the right of Figure 8 illustrates the geometry of the MagEIS aperture (the entrance  
 388 of the collimator) and slit (the end of the collimator). The relevant dimensions and angles are provided in  
 389 Table 9 with the following definitions of  $\theta_{min}$  and  $\theta_{max}$ :

$$\left. \begin{aligned}
 \tan \theta_{max,i} &= \frac{A_i + \Sigma_i}{2L} \\
 \tan \theta_{min,i} &= \frac{A_i - \Sigma_i}{2L}
 \end{aligned} \right\} \text{ for } i = 1, 2
 \tag{3}$$

390 Here, for each of the two dimensions,  $\theta_{min}$  is the largest angle where the whole slit is exposed through the  
 391 collimator, and  $\theta_{max}$  is the largest angle where any of it is exposed. In Table 9 and Figure 8, the subscript  
 392 2 (the  $s_2$ -direction) corresponds to the short dimension of the slit and the subscript 1 (the  $s_1$ -direction)  
 393 corresponds to the slit's long dimension (and vice versa for the aperture).

394 Figure 9 shows a representative example of the MagEIS electron spectrometer's angular response as  
 395 obtained from the Geant4 simulations described in the main manuscript. Here, we show the response for the  
 396 LOW-B unit with the main channels defined by main rate LUT 18434, with the color scale indicating the  
 397 effective area of that channel's response to particles arriving from each direction. The two rows of panels in  
 398 the figure present the responses of main channels 2 and 8 for four incident electron energies, represented by  
 399 the columns: the entire passband for the respective channel from the bowtie analysis (see main manuscript),  
 400 and the energies at the lower limit, centroid, and upper limit of that passband. In each panel, the angular  
 401 response is plotted on the color scale as a function of the two angles,  $\theta$  and  $\phi$ . The response is depicted in a  
 402 2D polar coordinate plot, where the  $\phi$  angle is plotted as the azimuthal (clock) angle from 0 to  $2\pi$  (clockwise  
 403 sense with  $\phi=0^\circ$  at the bottom of the panel) and the  $\theta$  angle is plotted as the radius. Two representative  
 404  $\theta$  values are shown with magenta circles. In addition, two reference rectangles are shown indicating the  
 405 nominal field-of-view (FOV) of the sensor, where the inner rectangle corresponds to the FOV defined by  
 406  $\theta_{min}$  and the outer corresponds to that defined by  $\theta_{max}$ . We note that, in some panels, apparent concentric  
 407 rings may be visible and are an artifact of the binning of the simulation results. In addition, in the Geant4  
 408 simulations conducted for LOW/MED, only  $\theta$  values in the range  $[0^\circ, 90^\circ]$  were considered, while for the  
 409 HIGH unit simulations,  $\theta$  values over  $[0^\circ, 180^\circ]$  were simulated.

410 The view of each panel in Figure 9 can be considered as looking into the sensor with the same perspective  
 411 as in the lower-left inset in Figure 8, although the locations in each panel of Figure 9 represent directions  
 412 of arrival, not positions. We emphasize that the primary response is approximately a rectangle. In such a  
 413 graphical representation, a non-ideal sensor response would manifest as non-rectangular distortions or twists  
 414 in the response. Also, in this representation, we note that asymmetry towards  $\phi=270^\circ$  indicates particles  
 415 that are already moving slightly towards the pixel focal plan when they enter the collimator. The pattern of  
 416 the intensities in these panels reflects two main dependencies of the angular response on the particle energy.

417 First, the "beam" of electrons traveling from the slit to the pixel has more room to spread out along  
 418 the magnetic field for particles that make longer arcs through the magnet chamber, and so the subset of



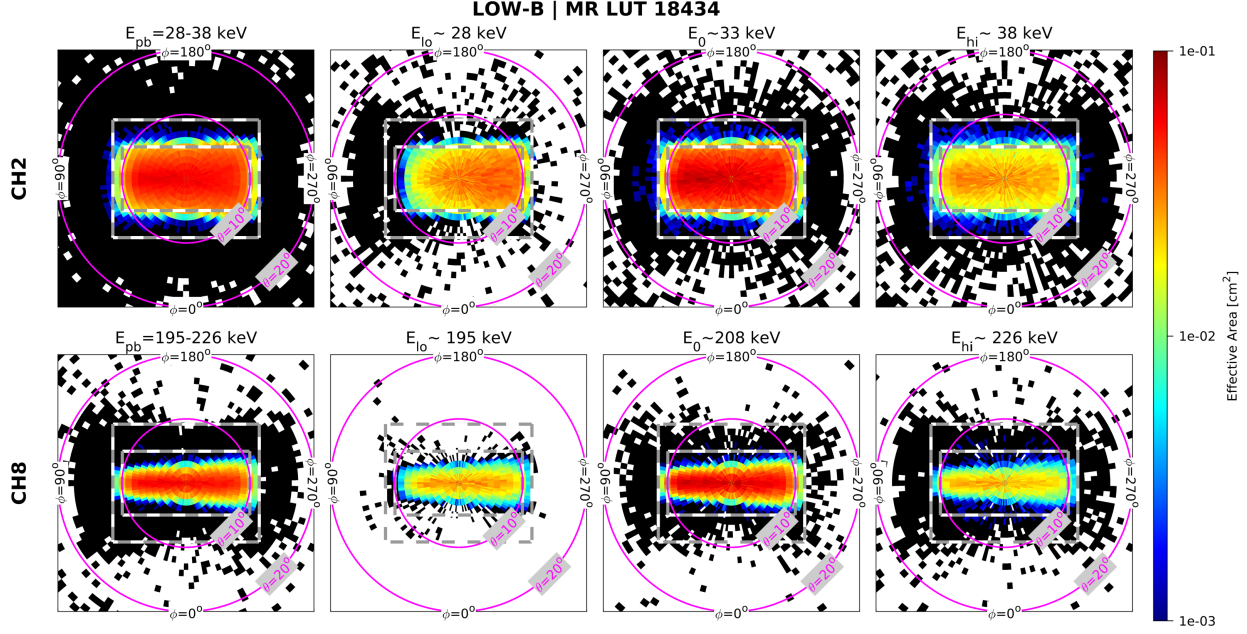

Figure 9: Effective areas for the response of two LOW-B main-rate channels (rows) as a function of electron incidence direction, for each channel’s entire passband (first column) and for energies at the low end, centroid, and high end of the passband (second through fourth columns).

419 such particles that actually reach the detector plane rather than running into the magnets or baffles will  
 420 be narrower in the  $s_1$  direction than for particles that make shorter arcs. Since higher-energy electrons  
 421 travel farther to reach the higher-numbered pixels, we can see in Figure 9 that the response for channel 8 is  
 422 narrower in the vertical direction than is that for channel 2. This is the primary cause of the overall decline  
 423 with energy of the response integrated over all incidence angles and plotted in Figure 13 of the main text.  
 424 Likewise, at a given energy a particle arriving from a direction with  $\phi$  between  $0^\circ$  and  $180^\circ$  will trace out a  
 425 larger arc than will a particle with  $\phi$  between  $180^\circ$  and  $360^\circ$ , going deeper into the chamber before circling  
 426 back to the detector as in Figure 7 of Blake et al. (2013). Thus, again, these particles will spread out more in  
 427 the direction along the magnetic field and more of them will strike the magnets or the chamber walls before  
 428 reaching the detector, and therefore the response shown in each panel of Figure 9 is narrower in the vertical  
 429 direction at the left of the panel, toward  $\phi = 90^\circ$ , especially in the lower row of plots for channel 8.

430 Second, electrons of the same energy that arrive from different directions may also be imperfectly focused  
 431 by the chamber magnetic field, so that they strike the detector plane at slightly different distances from  
 432 the slit. The effects of this were shown by Blake et al. (2013) in their Figures 7 and 8; the Geant4 sensor  
 433 models described in the main manuscript used the same realistic magnetic field configurations modeled in this  
 434 earlier work using the LORENTZ magnetic-circuit code, so we see the same effects in the present simulations.  
 435 Looking closely at Figure 7 of Blake et al. (2013), we see that an electron arriving from a direction with  
 436  $\phi = 90^\circ$  will strike the detector plane slightly closer to the slit than will an electron with the same energy  
 437 that arrives with  $\phi = 270^\circ$ . This means that, for an energy right at the boundary between the passbands of  
 438 adjacent pixels, an electron with  $\phi = 90^\circ$  may arrive at the lower-numbered pixel while one with  $\phi = 270^\circ$   
 439 arrives at the higher-numbered pixel. This is seen here in the second column of Figure 9, where the response  
 440 at the low-limit energy fades toward the left ( $\phi = 90^\circ$ ), and in the fourth column, where the response at  
 441 the high-limit energy fades toward the right ( $\phi = 270^\circ$ ), as electrons arriving from these directions at these  
 442 energies end up in an adjacent pixel. It is also the cause of the non-rectilinear shape of the energy-angle  
 443 response plot in Figure 8 of Blake et al. (2013).

444 The details of these effects will vary from pixel to pixel and sensor to sensor, depending on the details of  
 445 the geometry of the structures and the magnetic field. Figure 10 shows the same set of directional response  
 446 plots as in Figure 9, but now for channels 0 | 3 of the HIGH-B unit with LUT 31747. The vertical

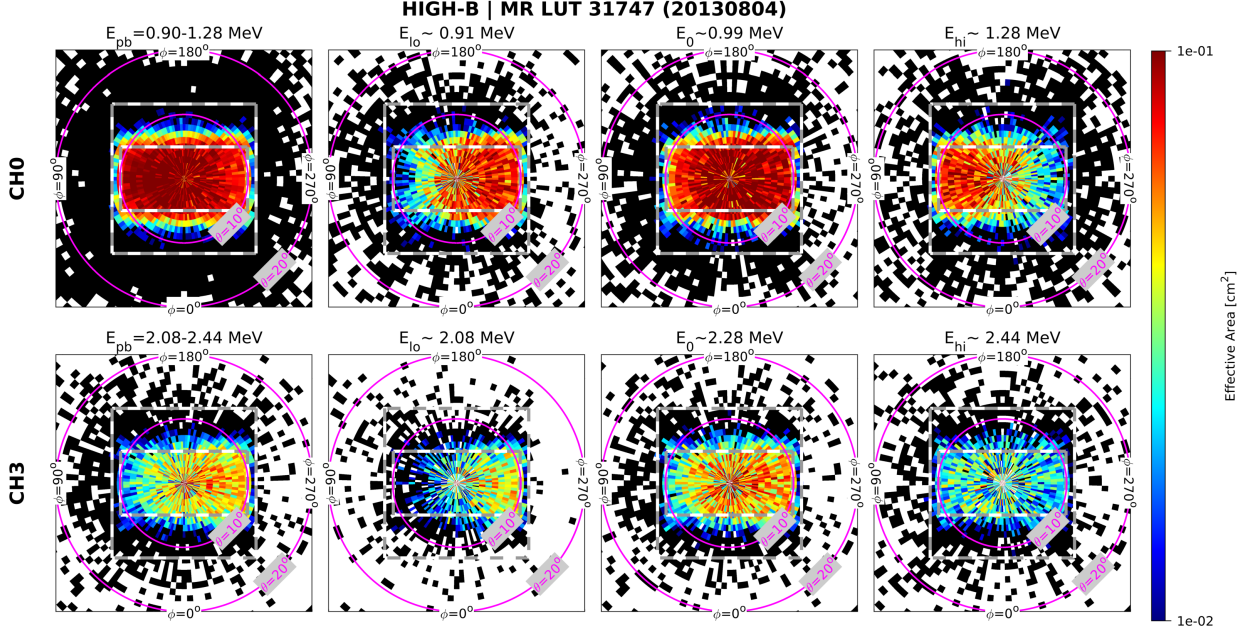

Figure 10: Same format as Figure 9 but here for two main-rate channels from the HIGH-B unit.

447 narrowing of response with energy is less than in Figure 9 because the chamber is wider in proportion to  
 448 the length of the detector plane, but the fading toward  $\phi = 90^\circ$  of the response in the second column at the  
 449 low-energy limits of the channels' passbands is more pronounced than in Figure 9. The fading of response  
 450 toward  $\phi = 270^\circ$  in the fourth column at the high-energy limits of the channels is visible in the first row but not the second;  
 451 this is due to the fact that channel 0 in the first row covers the whole energy range of electrons reaching  
 452 pixel 0, whereas channel 3 covers only the lower part (channel 4 takes the higher part in this split pixel) of  
 453 the energy range falling in pixel 2. Thus, the fourth column at the high-energy limit of channel 3 represents  
 454 electrons arriving in the middle of the physical pixel, where they will not be tipped into a different pixel  
 455 depending on their trajectories.

456 The response files provided in the Dryad data repository (link provided in the acknowledgments in the  
 457 main manuscript) contain all the information that a user of the MagEIS data would need to tease out the  
 458 details of the electron sensors' response, for purposes such as extraction of the detailed shape of pitch-angle  
 459 distributions vs. energy via deconvolution.

## 460 6 Chamber Magnetic Field Scaling

461 As described in the main manuscript, a careful comparison of the flight histogram data relative to the Geant4-  
 462 simulated responses revealed an offset between the two. We attributed this mismatch to a discrepancy  
 463 between the nominal chamber magnetic field provided by the LORENTZ simulation and the true magnetic  
 464 field within each unit. This effect is illustrated in Figure 11 for the LOW, M75, and HIGH units on Probe  
 465 B. Each panel shows histogram data from the indicated pixel in grey, where the data have been averaged  
 466 between  $L = 3 - 5$  on the indicated day and the counts are normalized to lie between 0 and 1. The  
 467 nominal simulated response is shown in red, where the isotropic response has been convolved with either an  
 468 exponential (LOW-B and HIGH-B) or power law spectrum (M75-B) with the indicated parameters. These  
 469 candidate spectra were determined by fitting the observed main channel spectrum within each unit's energy  
 470 range (averaged over the same  $L$  region on the same day) and are thus representative of the observed spectral  
 471 shape for the displayed histogram data. Comparing the nominal response (red) with the observed response  
 472 (grey) reveals that there can be a mismatch between the two. For example, LOW-B (top row) pixels 2-4  
 473 show a simulated response that is shifted to the left relative to the observed response.

474 We corrected for this mismatch by performing additional Geant4 simulations for each unit but with the

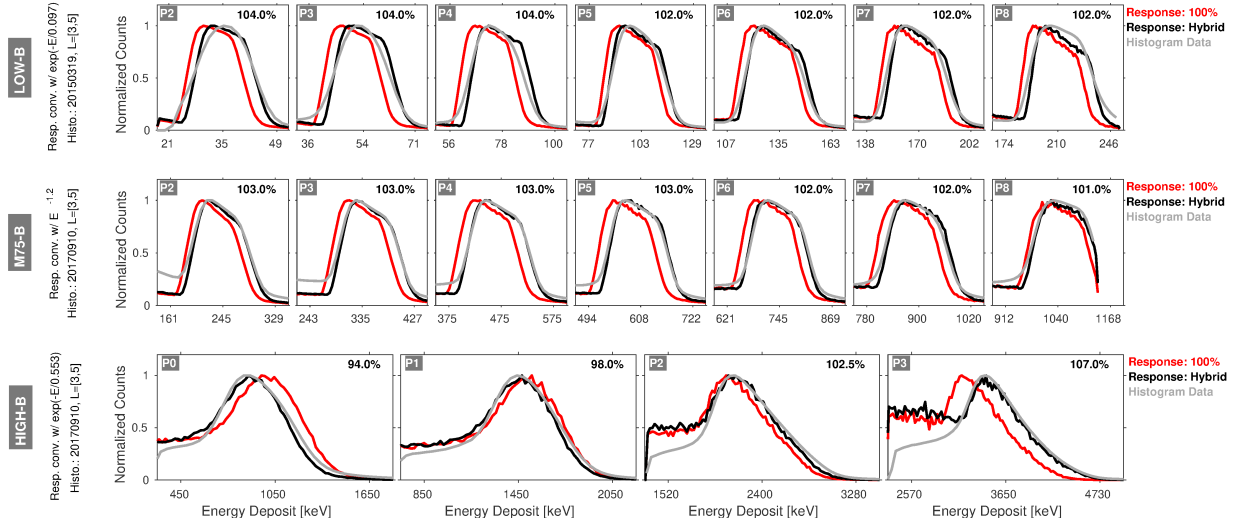

Figure 11: A comparison of histogram data (grey) with the Geant4-derived response, obtained using the nominal (unadjusted) chamber magnetic field (red) and the scaled field (black). The top row shows the LOW-B unit, the middle row shows the M75-B unit, and the bottom row shows the HIGH-B unit. The profiles in each column show normalized counts vs. energy deposit for the the indicated pixel. See text for further details.

LORENTZ-derived chamber magnetic field scaled by various percentages. The black line in each panel in Figure 11 shows the results from these simulations with the magnetic field scaling value indicated in the panel. For example, for LOW-B pixels 2-4, we see that a 104% scaling of the field is sufficient to bring the simulation results into good agreement with the observed response, while a lower field scaling is needed for the higher-energy pixels. For the M75-B unit, similar levels of scaling are required, while for the HIGH-B unit more substantial scalings are necessary ( $\sim 95\text{-}110\%$ ). We thus adopted the philosophy of choosing the optimal magnetic field scaling for each pixel in every unit, and then merging all of the pixel-specific responses together from a given unit to produce a “hybrid” response function for that unit. The magnetic field scaling values that were determined for each pixel on each unit are provided in Table 10.

We note that up through MagEIS data release 04 (“rel04”), we used a single magnetic-field scaling for all pixels in a given unit (i.e., this hybrid approach was not adopted until the final data release). The values used were as follows: LOW-A: 106.5%, LOW-B: 102%, M35-A: 100%, M35-B: 103%, M75-A: 102%, M75-B: 103%, HIGH-A: 100%, HIGH-B: 100%. For the relatively wide main channels ( $\Delta E/E \sim 30\%$ ) and the small field-scaling corrections necessary for the LOW and MED units (see Table 10), the bowtie-derived main channel energy centroids and flux conversion factors did not change significantly when we adopted the hybrid response functions (typically by  $\sim 5\%$  or less). However, since we did not originally scale the HIGH unit magnetic field and since the field-scaling corrections for the HIGH unit turned out to be quite large (see Table 10), the bowtie-derived main channel energy centroids and flux conversion factors (and thus the overall flux intensities) did change somewhat between release 04 and the final MagEIS data release ( $\sim 5\text{-}10\%$  for the energy centroids and  $\sim 20\text{-}40\%$  for the flux conversion factors). We emphasize that these revised main channel flux calibrations using the hybrid response functions improved the HIGH unit cross-calibration with the REPT instrument, and also the intercalibration with the MagEIS MED unit. Moreover, adopting the hybrid response functions was a crucial step in obtaining accurate flux conversions for the histogram data product, which has narrow energy channels ( $\Delta E/E \sim 3\%$ ) and is very sensitive to the detailed profile of the simulated response. This is because, at a simplified level, converting the histogram counts to fluxes essentially amounts to dividing the histogram data (Figure 11, grey) by the simulated responses (Figure 11, red/black). When the simulated response is offset relative to the histogram data, artifacts are introduced into the histogram flux spectrum.

As a final note on this topic, Figure 12 shows the nominal chamber magnetic fields obtained from the LORENTZ simulation that were used in the Geant4 simulations. The cuts shown in each panel are through

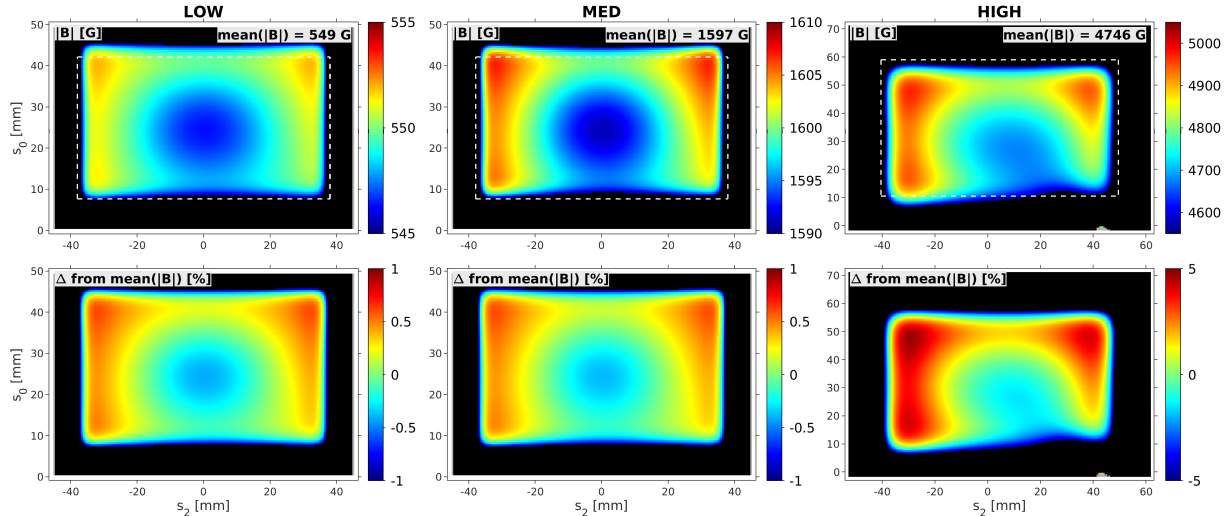

Figure 12: Cuts through the LORENTZ-simulated chamber magnetic field at the center of the chamber for each unit (columns). The top row shows the absolute field intensity while the bottom row shows the deviation from the mean field (averaged over the dashed box region indicated in the top panels). The chamber field is directed out of the page (in the  $s_1$  direction), the instrument aperture is near the bottom right corner, and the pixel array is located near  $s_0=0$  along the  $s_2$  dimension (see also Figure 8).

505 the center of the chamber in the short dimension,  $s_1$  (see Figure 8), which is directed out of the page and  
 506 is parallel to the chamber magnetic field. The top row shows the absolute intensity of the chamber field for  
 507 each unit, while the bottom row shows the percent deviation from the mean field. Here, we see that there  
 508 is nonuniformity in the chamber field on the order of 1% for the LOW/MED units and  $\sim 5\%$  for the HIGH  
 509 unit. Moreover, as electrons enter through the aperture (bottom right in each panel) and are deflected by  
 510 the chamber magnetic field, they will sample regions with differing field intensities as they are steered onto  
 511 the the pixel array (located near the  $s_0=0$  line). Note that electrons with different incident energies will  
 512 sample different regions of field intensity. These features in the LORENTZ-simulated field and the impact  
 513 that they have on the energy-dependent electron trajectories through the chamber may explain why it was  
 514 necessary to scale the chamber fields by the varying levels shown in Table 10.

## 515 7 Primary Variables in MagEIS Data Files

516 The following subsections describe the primary variables in the level 2 (L2) and level 3 (L3) MagEIS data  
 517 files, both for the unit-by-unit files and for the merged (LOW + M75 + HIGH) files. There is an important  
 518 caveat for the LOW/MED unit-by-unit L2 and L3 files. As described in the main manuscript, both pixels  
 519 0 and 1 on the LOW/MED electron spectrometers are noisy and should not be used, in general. However,  
 520 the noisy channel from pixel 1 is retained in the unit-by-unit LOW/MED L3 data files because the channel  
 521 from pixel 1 is sometimes free of noise, as described in the main manuscript (fluxes from pixel 0 are always  
 522 set to fill in the L2 and L3 files). The end user should remember this caveat when using the electron fluxes  
 523 from the unit-by-unit LOW/MED L2 and L3 files to ensure that they are not analyzing noisy P1 data.

524 In what follows, the “spin average” of a quantity  $J$  is defined as:

$$\langle J \rangle = \frac{1}{N} \sum_{i=1}^N J_i \quad (4)$$

525 where  $N$  is the number of sectors in one spacecraft spin. All spin-averaged count rates, fluxes, and livetimes  
 526 are computed in this way, though the error measure data products are spin-averaged in the root-mean-square  
 527 sense (see main manuscript). Note that, for MagEIS data products that are accumulated over multiple

528 spacecraft spins (like the histogram data), computing a “spin average” via the above equation is technically  
 529 an average over multiple consecutive spins (a “spin set”). Thus, in the MagEIS data files, any variables  
 530 referred to as “spin averaged” should be interpreted in this context when they are accumulated over multiple  
 531 spins.

## 532 7.1 Level 1 Data Files

533 Level 1 data files consist of the raw, uncalibrated count rates and ancillary data from the MagEIS instruments  
 534 and are generally not well-suited for scientific analysis. Thus, a full description of the contents of these data  
 535 files is not provided here, apart from the file naming convention:

- 536 • **File name (example):** rbspa\_int\_ect-mageisLOW-sp-L1\_20141231\_v8.0.0.cdf
- 537 • **File name (convention):** <source>.<type>.<descriptor>.<date>.<version>.cdf
  - 538 – **<source>:** ‘rbspa’ or ‘rbspb’
  - 539 – **<type>:** ‘int’ or ‘relNN’ or ‘final.’ ‘int’ is an internally-held version of the data file that is not  
 540 part of the public archive. The ‘NN’ in ‘relNN’ is the two-digit integer release number and ‘final’  
 541 represents the final release.
  - 542 – **<descriptor>:** Format of ect-mageisXXX-yy-L1. Here ‘XXX’ is the MagEIS unit (LOW, M35,  
 543 M75, or HIGH) and ‘yy’ is the level 1 data type, which can be one of four values: ‘sp’ (spin-  
 544 based, i.e., science data), ‘ns’ (non-spin based i.e., housekeeping/status data), ‘hr’ (high-rate  
 545 data; LOW/MED only), ‘de’ (direct-event data; HIGH only).
  - 546 – **<date>:** UTC day in yyyyymmdd format
  - 547 – **<version>:** Data version number

## 548 7.2 Level 2 Data Files

549 This section describes the primary data variables available in the level 2 data files. Note that some variables  
 550 are only available/defined in the unit-by-unit files, as noted. The file naming convention is that same as for  
 551 the level 1 files shown above, aside from the ‘descriptor’ field:

- 552 • **File name (example):** rbspa\_int\_ect-mageisM75-L2\_20141231\_v8.1.0.cdf
- 553 • **File name (convention):** <source>.<type>.<descriptor>.<date>.<version>.cdf
  - 554 – **<descriptor>:** Format of ect-mageisXXX-L2. Here ‘XXX’ is the MagEIS unit (LOW, M35,  
 555 M75, or HIGH) for the unit-by-unit files and is omitted (i.e., mageis-L2) for the merged files.
  - 556 – **<source>, <type>, <date>, <version>:** Same as level 1 files

557 Primary data variables:

- 558 • **Epoch/Epoch\_prot** Time base for the electron/proton fluxes. The epoch time corresponds to the  
 559 start of a spin (i.e., the start time of the first sector in a spin).
- 560 • **FESA/FPSA** Spin-averaged electron/proton flux.
- 561 • **FEDU/FPDU** Differential, unidirectional electron/proton flux. These data are resolved by spacecraft  
 562 spin-phase angle (“F\*DU\_Sector\_Angle”), ranging from 0-360 degrees. FEDU is only available in the  
 563 unit-by-unit level 2 data files (it is not in the merged level 2 file).
- 564 • **FESA\_CORR** Spin-averaged electron flux, background corrected
- 565 • **FEDU\_CORR** Differential, unidirectional electron flux, background corrected. These data are re-  
 566 solved by spacecraft spin-phase angle (“F\*DU\_Sector\_Angle”), ranging from 0-360 degrees. FEDU\_CORR  
 567 is only available in the unit-by-unit level 2 data files (it is not in the merged level 2 file).
- 568 • **FEDU\_Energy/FPDU\_Energy** Energy channel centroids for electron/proton flux (i.e., the vari-  
 569 ables: FESA, FESA\_CORR, FEDU, FEDU\_CORR; FPSA, FPDU)
- 570 • **FEDU\_Energy\_DELTA\_plus/FEDU\_Energy\_DELTA\_minus** Upper and lower bounds for the  
 571 electron energy channels FEDU\_Energy. Can be used to compute the channel widths.
- 572 • **FPDU\_Energy\_DELTA\_plus/FPDU\_Energy\_DELTA\_minus** Upper and lower bounds for the  
 573 proton energy channels FPDU\_Energy. Can be used to compute the channel widths.

- 574 • **FESA\_ERROR, FEDU\_ERROR** Percent error (due to counting statistics) in the uncorrected elec-  
575 tron data (spin-averaged, sector-angle resolved).
- 576 • **FPSA\_ERROR, FPDU\_ERROR** Percent error (due to counting statistics) in the proton data  
577 (spin-averaged, sector-angle resolved).
- 578 • **FESA\_CORR\_ERROR, FEDU\_CORR\_ERROR** Percent error (due to counting statistics and/or  
579 contamination) in the background-corrected electron data (spin-averaged, sector-angle resolved).
- 580 • **FESA\_Quality/FPSA\_Quality** Three-value quality flag (spin-averaged electrons/protons): 0=green,  
581 1=yellow, 2=red. See Sect. 7.7.
- 582 • **FEDU\_Quality/FPDU\_Quality** Three-value quality flag (sector-angle resolved electrons/protons):  
583 0=green, 1=yellow, 2=red. See Sect. 7.7.

584 The following housekeeping/status variables are only available in the unit-by-unit level 2 data files:

- 585 • **LUT\_ID\_MAIN** Lookup table (LUT) identifier (ID) for the main rate LUT.
- 586 • **BIAS\_MODE** Flag to indicate whether or not the electron detectors are in the normal bias (bias-on)  
587 or bias-off state (0=bias off; 1=normal bias). In the bias-off state, the electron fluxes should only be  
588 used qualitatively and with an abundance of caution.
- 589 • **INSTRUMENT\_MODE** Flag to indicate the mode of the MagEIS instruments (0=maintenance;  
590 1=science; 2=high-rate). Note that only the LOW and MED units can go into high rate mode; the  
591 HIGH unit can only be in maintenance or science mode. We note that the most common reason why  
592 background corrections cannot be done is when the LOW/MED units are in high-rate mode.
- 593 • **COINCIDENCE\_MODE** Flag to indicate whether or not the HIGH electron coincidence is enabled  
594 (0=disabled; 1=enabled). This variable is only valid/defined for the HIGH unit, as this is the only  
595 MagEIS unit with coincidence. In the disabled coincidence state, the electron fluxes should only be  
596 used qualitatively and with an abundance of caution.

597 The following variables are associated with the ion flux measurements from the two rear detectors in each  
598 of the ion telescopes. Here, “pix1” refers to the middle detector in each telescope: the 2 $\mu$  detector on Probe  
599 A and the inactive ‘LP’ detector on Probe B. Similarly, “pix2” refers to the rear detector in each telescope:  
600 the 9 $\mu$  detector on Probe A and the MSD detector on Probe B. At the time of writing, these measurements  
601 have not been properly calibrated:

- 602 • **FPSA\_pix1, FPSA\_pix2** Spin-averaged ion flux.
- 603 • **FPDU\_pix1, FPDU\_pix2** Differential, unidirectional ion flux. These data are resolved by spacecraft  
604 spin-phase angle (“FPDU\_Sector\_Angle”), ranging from 0-360 degrees.

### 605 7.3 Level 3 Data Files

606 This section describes the primary data variables available in the level 3 data files. Note that some variables  
607 are only available/defined in the unit-by-unit files, as noted. The file naming convention is the same as for  
608 the level 2 files above, aside from the ‘descriptor’ field where the ‘L2’ is replaced by an ‘L3.’

- 609 • **Epoch** Time base for the electron fluxes and is the start of the spin. Note that in the merged L3 files,  
610 Epoch is the coarsest time cadence of the 3 units, LOW, M75, and HIGH (the fluxes are interpolated  
611 to this common time cadence). The unit-by-unit L3 files are retained at their native time cadence.
- 612 • **Epoch\_prot** Time base for the proton fluxes (unit-by-unit files) and is the start of the spin.
- 613 • **FPDU\_Epoch** Time base for the proton fluxes (merged files) and is the start of the spin.
- 614 • **FEDU/FPDU** Differential, unidirectional electron/proton flux. These data are resolved into bins in  
615 local pitch angle.
- 616 • **FEDU\_CORR** Differential, unidirectional electron flux, background corrected. These data are re-  
617 solved into bins in local pitch angle.
- 618 • **FEDU\_Energy/FPDU\_Energy** Energy channel centroids for electron/proton flux (FEDU, FEDU\_CORR/FPDU).
- 619 • **FEDU\_Energy\_DELTA\_plus/FEDU\_Energy\_DELTA\_minus** Midpoint (in log<sub>10</sub>(Energy)) be-  
620 tween the electron energy channel centroids, FEDU\_Energy. Note that these are not the upper and  
621 lower bounds for the electron energy channel centroids, as is the case in the level 2 files, and thus

622 they cannot be used to compute the channel widths (use the corresponding values in the level 2 files  
623 instead).

- 624 • **FPDU\_Energy\_DELTA\_plus/FPDU\_Energy\_DELTA\_minus** Same as previous line, for protons.
- 625 • **FEDU\_ERROR,FPDU\_ERROR** Percent error (due to counting statistics) in the uncorrected elec-  
626 tron and proton flux data (pitch-angle resolved).
- 627 • **FEDU\_CORR\_ERROR** Percent error (due to counting statistics and/or contamination) in the  
628 background-corrected electron data (pitch-angle resolved). .
- 629 • **FEDU\_Quality/FPDU\_Quality** Three-value quality flag (pitch-angle resolved electrons/protons):  
630 0=green, 1=yellow, 2=red. See Sect. 7.7.

631 In the unit-by-unit level 3 data files, the raw, “unbinned” pitch angle resolved fluxes are also provided, where  
632 the instantaneous sector angle is converted to pitch angle. The flux variable names are similar to the binned  
633 pitch angle variables described above (e.g., FEDU), but also include the “Unbinned” tag in the variable name.  
634 Both half-spin (“\*\_0to180”) and full-spin (“\*\_0to360”) flux data variables are provided. For these unbinned  
635 data, the pitch-angle value for each sector corresponds to the pitch-angle at the center of each sector, and  
636 is contained in the variable “FEDU\_Unbinned\_Alpha360” (full spin) and “FEDU\_Unbinned\_Alpha180” (half  
637 spin). These unbinned/full-spin pitch-angle data are useful if one wishes to construct one’s own pitch-angle  
638 binning, examine non-gyrotropic effects, etc. Note that the unbinned pitch angle data is time tagged with  
639 Epoch, which not entirely consistent. Epoch is the start of the spin but the unbinned pitch angle variable is  
640 the pitch angle at the center of each sector (i.e., the unbinned data should really be time tagged with Epoch  
641 plus half the sector time).

642 Also, as in the level 2 data files, in the level 3 files there are variables associated with the ion flux  
643 measurements from the two rear detectors in each of the ion telescopes (i.e., FPDU\_pix1, FPDU\_pix2; see  
644 above).

## 645 7.4 Level 2 High Rate (HR) Data Files

646 This section describes the primary data variables available in the level 2 high-rate data files. Note that there  
647 is no merged high-rate data product, only unit-by-unit files. The file naming convention is the same as the  
648 level 1 files above, aside from the ‘descriptor’ field:

- 649 • **File name (example):** rbspa\_int\_ect-mageisLOW-hr-L2\_20141231\_v8.0.0.cdf
- 650 • **File name (convention):** <source>.<type>.<descriptor>.<date>.<version>.cdf
  - 651 – **<descriptor>:** Format of ect-mageisXXX-hr-L2. Here ‘XXX’ is the MagEIS unit (LOW, M35,  
652 or M75).
  - 653 – **<source>, <type>, <date>, <version>:** Same as level 1 files

654 Primary data variables:

- 655 • **HighRate** Differential, unidirectional electron flux. These data are resolved by energy channel and  
656 spacecraft spin-phase angle (“FEDU\_Sector\_Angle”). The array dimensions are ntime x 2048 x 8 (e.g.,  
657 ntime x nsectors\_max x nchannels\_max). If fewer than 8 channels are recorded, then the fluxes from  
658 the unused channels are set to fill value. If fewer than 2048 sectors are recorded, then the fluxes from  
659 the unused sectors are set to fill value.
- 660 • **FEDU\_Sector\_Angle** Instantaneous, spin-phase (sector) angle, 0-360 degrees. The angle is the value  
661 at the start of the sector. There are 2048 possible HR sectors but typically fewer than 2048 sectors are  
662 recorded (e.g., 500, 1000, or 2000). The array dimensions are ntime x 2048 so that, for a fixed time  
663 index, the first value corresponds to sector angle at the start of the first sector in the spin, the second  
664 value corresponds to sector angle at the start of the second sector in the spin, and so on.
- 665 • **FEDU\_Energy** Energy channel centroids for electron flux (HighRate). There are 8 possible HR  
666 channels but typically fewer than 8 channels are recorded (e.g., 3, 5, or 7).
- 667 • **FEDU\_Energy\_DELTA\_plus/FEDU\_Energy\_DELTA\_minus** Upper and lower bounds for the  
668 electron energy channels FEDU\_Energy. Can be used to compute the channel widths.
- 669 • **HighRate\_ERROR** Percent error (due to counting statistics) in the HighRate electron flux data.
- 670 • **LUT\_ID\_HighRate** Lookup table (LUT) identifier (ID) for the high rate LUT.

## 7.5 Level 3 Highrate (HR) Data Files

This section describes the primary data variables available in the level 3 high-rate data files. Note that there is no merged high-rate data product, only unit-by-unit files. The file naming convention is the same as in the level 2 high-rate files above, aside from the ‘descriptor’ field where the ‘L2’ is replaced by an ‘L3.’

- **HighRate** Differential, unidirectional electron flux. These data are resolved by energy channel and local pitch angle in each angular sector. The array dimensions are `ntime x 2048 x 8` (e.g., `ntime x nsectors_max x nchannels_max`). If less than 8 channels are recorded, then the fluxes from the unused channels are set to fill value. If less than 2048 sectors are recorded, then the fluxes from the unused sectors are set to fill value.
- **HighRate\_Alpha360** Instantaneous, full-spin (0-360 degrees), local pitch angle for each sector. There are 2048 possible HR sectors but typically fewer than 2048 sectors are recorded (e.g., 500, 1000, or 2000). The pitch angle is given at the center of each angular sector. The array dimensions are `ntime x 2048` so that, for a fixed time index, the first value corresponds to pitch angle at the center of the first sector in the spin, the second value corresponds to pitch angle at the center of the second sector in the spin, and so on.
- **FEDU\_Energy** Energy channel centroids for electron flux (HighRate). There are 8 possible HR channels but typically fewer than 8 channels are recorded (e.g., 3, 5, or 7).
- **HighRate\_ERROR** Percent error (due to counting statistics) in the HighRate electron flux data.

## 7.6 Level 2 and Level 3 Histogram (HG) Data Files

The high-energy-resolution electron histogram fluxes are provided in the level 2 (L2) and level 3 (L3) HG data files. Their contents/variables are nearly identical to the regular (main rate channel) L2 and L3 files (Sect. 7.2 and Sect. 7.3) and so, for brevity, are not described in detail here. Like the regular L2 and L3 files, there are both unit-by-unit and merged L2 and L3 files. For the unit-by-unit HG files, the file naming convention follows the format used above for the high rate data files, but with the “hr” tag replaced with an “hg.” For the merged HG files, the descriptor field is in the format of “ect-mageis-hg-L2.” The important differences relative to the regular L2 and L3 are as follows:

- The energy dimension is larger in the HG files to accommodate the increased energy resolution.
- The maximum number of sectors is 32 in the HG files vs. 64 in the regular files.
- In the merged L2 HG files, the fluxes are time-averaged on a 2-minute time cadence and the Epoch time is the center of the time bin. Note that this is only the case for the merged L2 HG files; the unit-by-unit L2 HG files contain the data at the native histogram time cadence (see Table 1 in the main manuscript) where the Epoch variable is the beginning of the accumulation period (i.e., the start of a block of NSPINS spins). This time averaging in the merged L2 HG files is done to improve counting statistics and to provide a uniform time base for the histogram data combined from the 3 units, LOW+M75+HIGH, since there is no guarantee that the individual unit-by-unit L2 HG files are all on the same time cadence (histograms are accumulated over multiple spins and units can be out-of-phase with one another in time).
- In the merged L3 HG files, the fluxes are interpolated to a common time cadence, the coarsest time cadence of the 3 units, LOW, M75, and HIGH. The unit-by-unit L3 HG files are retained at their native time cadence and the Epoch variable is the start of a block of NSPINS spins. To compute pitch angles in the unit-by-unit files, the magnetic field at the time consistent with the central spin of the NSPINS-spin block is used.
- Data quality flag variables (e.g., `FESA_Quality`) and some of the other support variables are not included in the HG files. The end user can examine the data quality flags in the regular L2 files as a proxy. Note, however, that errors from counting statistics (i.e., `FESA_ERROR`) and background contamination (i.e., `FESA_CORR_ERROR`) are provided in the HG files.

## 7.7 Data Quality Flags

Data quality flags are provided in the regular level 2 and level 3 data files (i.e., not in the high rate or histogram data files). The data quality flags provide a simple flag that can take on one of three possible



720 values (i.e., a red, yellow, green flag):

721 0. (green): There are no known issues with the data.

722 1. (yellow): The data should be used with caution. Examples include: background corrections could  
723 not be performed (electrons only); low counts, large backgrounds (electrons only), or both; detector  
724 coincidence was disabled (HIGH electrons only); deadtime correction was not performed; calibration  
725 tunings.

726 2. (red): The data are highly suspect and should be used with extreme care. Examples include: very  
727 low counts, very large backgrounds (electrons only), or both; detector bias was disabled (i.e., in the  
728 bias-off state); large deadtimes (>40%); noisy channels.

729 These flag values are first determined on a sector-by-sector basis in each spin. The spin-averaged quality flag  
730 is then determined by taking the most frequently occurring value of the sectored quality flag in a given spin.  
731 For example, if there are 4 sectors per spin with corresponding flag values = [0,0,1,2], then spin-averaged  
732 quality flag is 0 for that spin.

Table 1: HIGH Electron Spectrometer Coincidence/Threshold Changes, Testing Intervals, and Thermal Oscillation (TO) Noise Intervals

|                                  | Date        | Unit                                                   | Type                                                                                        |
|----------------------------------|-------------|--------------------------------------------------------|---------------------------------------------------------------------------------------------|
| <i>Coinc./Thresh. Changes</i>    | 24 Oct 2012 | HIGH-A, -B                                             | Coincidence window: 20 $\mu s$ to 10 $\mu s$                                                |
|                                  | 21 Dec 2012 | HIGH-A                                                 | Coincidence window: 10 $\mu s$ to 20 $\mu s$                                                |
|                                  | 22 Dec 2012 | HIGH-B                                                 | Coincidence window: 10 $\mu s$ to 20 $\mu s$                                                |
|                                  | 31 Mar 2013 | HIGH-A, -B                                             | Coincidence window: 20 $\mu s$ to 10 $\mu s$                                                |
|                                  | 04 Apr 2013 | HIGH-B                                                 | Coincidence window: 10 $\mu s$ to 5 $\mu s$                                                 |
|                                  | 03 Jul 2013 | HIGH-A, -B                                             | Threshold changes                                                                           |
|                                  | 18 Jul 2013 | HIGH-A, -B                                             | Threshold changes                                                                           |
|                                  | 25 Jul 2013 | HIGH-B                                                 | Threshold changes                                                                           |
|                                  | 26 Jul 2013 | HIGH-A                                                 | Threshold changes                                                                           |
|                                  | 03 Aug 2013 | HIGH-A, -B                                             | Threshold changes                                                                           |
|                                  | 14 Aug 2013 | HIGH-A                                                 | Threshold changes                                                                           |
|                                  | 14 Aug 2013 | HIGH-A                                                 | Coincidence window: 10 $\mu s$ to 5 $\mu s$                                                 |
|                                  | 21 Aug 2013 | HIGH-A                                                 | Threshold changes                                                                           |
|                                  | 26 Sep 2013 | HIGH-A                                                 | Threshold changes                                                                           |
| <i>Testing</i>                   | 23 May 2014 | HIGH-A, -B                                             | Coincidence testing; turned off until 5/28                                                  |
|                                  | 28 May 2014 | HIGH-A, -B                                             | Coincidence turned back on                                                                  |
|                                  | 01 Jun 2014 | HIGH-A, -B                                             | Coincidence testing                                                                         |
|                                  | 04 Jun 2014 | HIGH-A                                                 | Coincidence testing                                                                         |
|                                  | 05 Jun 2014 | HIGH-A, -B                                             | Coincidence testing                                                                         |
| <i>Thermal Oscillation Noise</i> | 29 May 2014 | HIGH-A                                                 | Incorrect P0 threshold $\rightarrow$ cross-talk noise in all pixels until corrected on 5/31 |
|                                  | 29 May 2014 | HIGH-B                                                 | Incorrect heater set point $\rightarrow$ TO in P3 until 9/18 <sup>a</sup>                   |
|                                  | 31 May 2014 | HIGH-A                                                 | Correct thresholds restored                                                                 |
|                                  | 06 Aug 2014 | HIGH-A                                                 | TO noise in P1. Not corrected until 11/07 <sup>b</sup>                                      |
|                                  | 18 Sep 2014 | HIGH-B                                                 | Incorrect heater set point corrected                                                        |
|                                  | 07 Nov 2014 | HIGH-A                                                 | Heater set point lowered. Corrected TO noise in P1                                          |
|                                  | 11 Mar 2016 | HIGH-B                                                 | Heater set point lowered (preemptive)                                                       |
|                                  | 18 Mar 2016 | HIGH-B                                                 | Heater set point lowered (preemptive)                                                       |
|                                  | 26 Nov 2016 | HIGH-A                                                 | TO noise in P1. Not corrected until 12/06 <sup>c</sup>                                      |
|                                  | 06 Dec 2016 | HIGH-A                                                 | Heater set point lowered. Corrected TO noise in P1                                          |
|                                  | 04 Oct 2017 | HIGH-A                                                 | TO noise in P1. Not corrected until 10/12 <sup>d</sup>                                      |
|                                  | 12 Oct 2017 | HIGH-A                                                 | Heater set point lowered. Corrected TO noise in P1                                          |
|                                  | 27 Dec 2017 | HIGH-A                                                 | TO noise in P1. Not corrected until 01/03 <sup>e</sup>                                      |
|                                  | 03 Jan 2018 | HIGH-A                                                 | Heater set point lowered. Corrected TO noise in P1                                          |
| 24 Mar 2018                      | HIGH-A      | TO noise in P1. Not corrected until 04/11 <sup>f</sup> |                                                                                             |
| 11 Apr 2018                      | HIGH-A      | Heater set point lowered. Corrected TO noise in P1     |                                                                                             |

<sup>a</sup>HIGH-B P3 data is set to fill value from 29 May 2014 to 18 Sep 2014

<sup>b</sup>HIGH-A P1 data is set to fill value from 06 Aug 2014 to 07 Nov 2014

<sup>c</sup>HIGH-A P1 data is set to fill value from 26 Nov 2016 to 06 Dec 2016

<sup>d</sup>HIGH-A P1 data is set to fill value from 04 Oct 2017 to 12 Oct 2017

<sup>e</sup>HIGH-A P1 data is set to fill value from 27 Dec 2017 to 03 Jan 2018

<sup>f</sup>HIGH-A P1 data is set to fill value from 24 Mar 2018 to 11 Apr 2018

Table 2: Dates and times of LUT table changes for the electron main rates.

| Time                | Unit-Probe | LUT ID                   |
|---------------------|------------|--------------------------|
| 2012/09/25 05:30:00 | HIGH-A     | 29696>29697              |
| 2012/09/25 05:30:00 | M35-A      | 20481>20482              |
| 2012/09/28 15:42:00 | HIGH-B     | 31744>31745              |
| 2012/09/28 15:42:00 | M75-B      | 25600>25601              |
| 2012/10/04 16:20:00 | HIGH-B     | 31745>31746              |
| 2012/10/04 19:00:00 | HIGH-A     | 29697>29698              |
| 2012/10/04 18:55:00 | M75-A      | 24577>24578              |
| 2012/10/17 00:00:00 | LOW-B      | 17408>18433              |
| 2012/10/24 00:00:00 | M75-B      | 25601>26626              |
| 2013/02/24 00:00:00 | M75-A      | 24578>24577              |
| 2013/02/24 00:00:00 | M75-B      | 26626>25601              |
| 2013/03/31 00:00:00 | LOW-A      | 16385>16386              |
| 2013/03/31 00:00:00 | LOW-B      | 18433>18434              |
| 2013/03/31 00:00:00 | M35-A      | 20482>38913 <sup>a</sup> |
| 2013/03/31 00:00:00 | M75-A      | 24577>24579              |
| 2013/03/31 00:00:00 | M75-B      | 25601>26627              |
| 2013/03/31 00:00:00 | HIGH-A     | 29698>29699              |
| 2013/03/31 00:00:00 | HIGH-B     | 31746>31747              |
| 2013/04/03 00:00:00 | M35-A      | 38913>20483              |
| 2013/04/03 00:00:00 | M35-B      | 38912>38913              |

<sup>a</sup>38913 was a M35-B LUT inadvertently uploaded to M35-A (corrected on 2013/04/03).

Table 3: Dates and times of LUT table changes for the electron histograms.

| Time                | Unit-Probe | LUT ID      |
|---------------------|------------|-------------|
| 2012/09/19 21:35:00 | HIGH-A     | 29441>ENG   |
| 2012/09/21 01:12:00 | HIGH-B     | 31489>ENG   |
| 2012/10/02 17:29:00 | LOW-A      | 16641>16642 |
| 2012/10/02 17:29:00 | M35-A      | 20737>20738 |
| 2012/10/02 17:29:00 | M75-A      | 24833>24834 |
| 2012/10/02 17:57:00 | LOW-B      | 17664>18689 |
| 2012/10/02 17:57:00 | M35-B      | 39168>39169 |
| 2012/10/02 17:57:00 | M75-B      | 25856>26880 |
| 2012/10/04 19:00:00 | LOW-A      | 16642>16641 |
| 2012/10/04 19:00:00 | M35-A      | 20738>20737 |
| 2012/10/04 19:00:00 | M75-A      | 24834>24833 |
| 2012/10/04 16:20:00 | LOW-B      | 18689>17664 |
| 2012/10/04 16:20:00 | M35-B      | 39169>39168 |
| 2012/10/04 16:20:00 | M75-B      | 26880>25856 |
| 2012/10/04 19:00:00 | HIGH-A     | ENG>29442   |
| 2012/10/04 16:20:00 | HIGH-B     | ENG>31490   |
| 2012/10/18 00:00:00 | M75-A      | 24833>24834 |
| 2012/10/18 06:40:00 | M75-B      | 25856>26880 |
| 2012/10/18 00:30:00 | M35-A      | 20737>20738 |
| 2012/10/18 06:40:00 | M35-B      | 39168>39169 |
| 2012/10/25 03:20:00 | LOW-A      | 16641>16642 |
| 2012/10/25 03:20:00 | LOW-B      | 17664>18690 |

Table 4: Dates and times of LUT table changes for the ion main rates.

| Time                | Unit-Probe | LUT ID      |
|---------------------|------------|-------------|
| 2012/09/28 15:42:00 | HIGH-B     | 32000>32001 |
| 2012/12/23 00:00:00 | HIGH-A     | 29952>29953 |
| 2013/03/31 00:00:00 | HIGH-A     | 29953>29954 |

Table 5: Dates and times of LUT table changes for the ion histograms.

| Time                | Unit-Probe | LUT ID      |
|---------------------|------------|-------------|
| 2012/09/28 15:42:00 | HIGH-B     | 32257>ENG   |
| 2012/11/28 00:00:00 | HIGH-B     | 32257>32258 |
| 2013/02/13 00:00:00 | HIGH-A     | 30208>30209 |
| 2013/04/04 00:00:00 | HIGH-A     | 30209>30210 |
| 2013/07/24 00:00:00 | HIGH-A     | 30210>30211 |
| 2013/09/26 00:00:00 | HIGH-A     | 30211>30209 |

Table 6: Dates and times of LUT table changes for the electron high rates.

| Time                | Unit-Probe | LUT ID      |
|---------------------|------------|-------------|
| 2012/10/04 19:00:00 | M75-A      | NONE>25088  |
| 2012/10/09 06:30:00 | LOW-B      | ENG>18944   |
| 2012/10/09 06:30:00 | M75-B      | ENG>27136   |
| 2012/10/09 11:10:00 | LOW-A      | ENG>16896   |
| 2012/10/09 11:10:00 | M75-A      | ENG>25089   |
| 2012/12/23 00:00:00 | LOW-A      | 16896>16897 |
| 2012/12/23 00:00:00 | LOW-B      | 18944>18945 |
| 2012/12/23 00:00:00 | M35-A      | NONE>20992  |
| 2012/12/23 00:00:00 | M75-B      | 27136>27137 |
| 2013/02/24 00:00:00 | M75-A      | 25089>25088 |
| 2013/02/24 00:00:00 | M75-B      | 27137>27136 |
| 2013/04/04 00:00:00 | LOW-A      | 16897>16898 |
| 2013/04/04 00:00:00 | LOW-B      | 18945>18946 |
| 2013/04/04 00:00:00 | M35-A      | 20992>20993 |
| 2013/04/04 00:00:00 | M35-B      | 39424>39425 |
| 2013/04/04 00:00:00 | M75-A      | 25088>25090 |
| 2013/04/04 00:00:00 | M75-B      | 27136>27138 |
| 2013/07/12 00:00:00 | LOW-B      | 18946>18947 |
| 2013/07/12 00:00:00 | LOW-A      | 16898>16899 |
| 2013/07/13 00:00:00 | M75-B      | 27138>27139 |
| 2013/07/14 00:00:00 | M75-A      | 25090>25091 |
| 2015/09/16 00:00:00 | M35-A      | 20993>20994 |
| 2015/09/16 00:00:00 | M35-B      | 39425>39426 |
| 2017/07/31 00:00:00 | M75-A      | 25091>25092 |
| 2017/07/31 00:00:00 | M75-B      | 27139>27140 |

Table 7: Start and stop times for the low-bias state, Probe A. The times indicated are accurate to 5 min. Nearly all of these instances fall into 3 categories (1) Instrument turn-on in early Sep 2012; (2) Instrument reboots (e.g., for LUT uploads); (3) Instrument anomaly investigations.

| Unit   | Start UTC            | Stop UTC             | Duration |
|--------|----------------------|----------------------|----------|
| LOW-A  | 06-Sep-2012 17:17:30 | 06-Sep-2012 17:47:30 | 30 min   |
| LOW-A  | 07-Sep-2012 20:47:30 | 11-Sep-2012 22:57:30 | 4.1 day  |
| LOW-A  | 17-Sep-2012 22:27:30 | 17-Sep-2012 22:32:30 | < 5 min  |
| LOW-A  | 02-Oct-2012 17:52:30 | 02-Oct-2012 17:57:30 | < 5 min  |
| LOW-A  | 07-Oct-2012 04:02:30 | 07-Oct-2012 04:07:30 | < 5 min  |
| LOW-A  | 20-Dec-2012 16:22:30 | 20-Dec-2012 16:27:30 | < 5 min  |
| LOW-A  | 23-Dec-2012 00:02:30 | 23-Dec-2012 00:07:30 | < 5 min  |
| LOW-A  | 31-Mar-2013 00:02:30 | 31-Mar-2013 00:07:30 | < 5 min  |
| LOW-A  | 04-Apr-2013 00:02:30 | 04-Apr-2013 00:07:30 | < 5 min  |
| LOW-A  | 19-Sep-2017 15:32:30 | 19-Sep-2017 23:57:30 | 8.4 hr   |
| LOW-A  | 22-Sep-2017 00:02:30 | 26-Sep-2017 18:07:30 | 4.8 day  |
| M35-A  | 06-Sep-2012 17:17:30 | 06-Sep-2012 17:57:30 | 40 min   |
| M35-A  | 07-Sep-2012 21:07:30 | 11-Sep-2012 05:47:30 | 3.4 day  |
| M35-A  | 17-Sep-2012 22:47:30 | 17-Sep-2012 22:57:30 | 10 min   |
| M35-A  | 25-Sep-2012 05:27:30 | 28-Sep-2012 10:02:30 | 3.2 day  |
| M35-A  | 02-Oct-2012 18:02:30 | 20-Dec-2012 16:42:30 | 78.9 day |
| M35-A  | 23-Dec-2012 00:02:30 | 23-Dec-2012 00:07:30 | < 5 min  |
| M35-A  | 31-Mar-2013 00:02:30 | 31-Mar-2013 00:07:30 | < 5 min  |
| M35-A  | 03-Apr-2013 00:02:30 | 03-Apr-2013 00:07:30 | < 5 min  |
| M35-A  | 04-Apr-2013 00:02:30 | 04-Apr-2013 00:07:30 | < 5 min  |
| M75-A  | 06-Sep-2012 17:17:30 | 11-Sep-2012 05:47:30 | 4.5 day  |
| M75-A  | 11-Sep-2012 23:12:30 | 11-Sep-2012 23:17:30 | < 5 min  |
| M75-A  | 17-Sep-2012 22:47:30 | 17-Sep-2012 22:57:30 | 10 min   |
| M75-A  | 28-Sep-2012 19:02:30 | 28-Sep-2012 19:07:30 | < 5 min  |
| M75-A  | 02-Oct-2012 18:07:30 | 02-Oct-2012 18:12:30 | < 5 min  |
| M75-A  | 04-Oct-2012 19:02:30 | 04-Oct-2012 19:07:30 | < 5 min  |
| M75-A  | 12-Oct-2012 11:27:30 | 16-Oct-2012 04:02:30 | 3.7 day  |
| M75-A  | 18-Oct-2012 00:02:30 | 18-Oct-2012 00:12:30 | 10 min   |
| M75-A  | 14-Dec-2012 14:52:30 | 14-Dec-2012 14:57:30 | < 5 min  |
| M75-A  | 24-Feb-2013 00:02:30 | 24-Feb-2013 00:07:30 | < 5 min  |
| HIGH-A | 06-Sep-2012 17:22:30 | 06-Sep-2012 18:17:30 | 55 min   |
| HIGH-A | 07-Sep-2012 21:17:30 | 11-Sep-2012 23:17:30 | 4.1 day  |
| HIGH-A | 17-Sep-2012 22:52:30 | 18-Sep-2012 11:57:30 | 13.1 hr  |
| HIGH-A | 19-Sep-2012 21:57:30 | 19-Sep-2012 22:02:30 | < 5 min  |
| HIGH-A | 25-Sep-2012 05:27:30 | 28-Sep-2012 19:47:30 | 3.6 day  |
| HIGH-A | 04-Oct-2012 18:47:30 | 04-Oct-2012 18:52:30 | < 5 min  |
| HIGH-A | 25-Oct-2012 03:22:30 | 25-Oct-2012 23:57:30 | 20.6 hr  |
| HIGH-A | 20-Dec-2012 16:52:30 | 20-Dec-2012 17:02:30 | 10 min   |
| HIGH-A | 23-Dec-2012 00:02:30 | 23-Dec-2012 00:07:30 | < 5 min  |
| HIGH-A | 13-Feb-2013 00:02:30 | 13-Feb-2013 00:07:30 | < 5 min  |
| HIGH-A | 31-Mar-2013 00:02:30 | 31-Mar-2013 00:07:30 | < 5 min  |
| HIGH-A | 04-Apr-2013 00:02:30 | 04-Apr-2013 00:07:30 | < 5 min  |
| HIGH-A | 24-Jul-2013 00:02:30 | 24-Jul-2013 00:07:30 | < 5 min  |
| HIGH-A | 26-Sep-2013 00:02:30 | 26-Sep-2013 00:07:30 | < 5 min  |
| HIGH-A | 11-Oct-2013 22:12:30 | 11-Oct-2013 23:57:30 | 1.7 hr   |
| HIGH-A | 16-Oct-2013 19:17:30 | 16-Oct-2013 23:57:30 | 4.7 hr   |
| HIGH-A | 29-May-2014 00:02:30 | 29-May-2014 00:07:30 | < 5 min  |

Table 8: Start and stop times for the low-bias state, Probe B. The times indicated are accurate to 5 min. Nearly all of these instances fall into 3 categories (1) Instrument turn-on in early Sep 2012; (2) Instrument reboots (e.g., for LUT uploads); (3) Instrument anomaly investigations.

| Unit   | Start UTC            | Stop UTC             | Duration |
|--------|----------------------|----------------------|----------|
| LOW-B  | 06-Sep-2012 18:37:30 | 11-Sep-2012 10:57:30 | 4.7 day  |
| LOW-B  | 12-Sep-2012 00:57:30 | 12-Sep-2012 01:02:30 | < 5 min  |
| LOW-B  | 18-Sep-2012 01:47:30 | 18-Sep-2012 01:52:30 | < 5 min  |
| LOW-B  | 02-Oct-2012 18:37:30 | 02-Oct-2012 18:42:30 | < 5 min  |
| LOW-B  | 17-Oct-2012 00:02:30 | 17-Oct-2012 00:07:30 | < 5 min  |
| LOW-B  | 21-Dec-2012 15:22:30 | 21-Dec-2012 15:27:30 | < 5 min  |
| LOW-B  | 23-Dec-2012 00:02:30 | 23-Dec-2012 00:07:30 | < 5 min  |
| LOW-B  | 31-Mar-2013 00:02:30 | 31-Mar-2013 00:07:30 | < 5 min  |
| LOW-B  | 04-Apr-2013 00:02:30 | 04-Apr-2013 00:07:30 | < 5 min  |
| M35-B  | 06-Sep-2012 18:37:30 | 06-Sep-2012 18:57:30 | 20 min   |
| M35-B  | 07-Sep-2012 19:52:30 | 11-Sep-2012 10:57:30 | 3.6 day  |
| M35-B  | 12-Sep-2012 01:02:30 | 18-Sep-2012 01:57:30 | 6.0 day  |
| M35-B  | 18-Sep-2012 02:02:30 | 18-Sep-2012 02:07:30 | < 5 min  |
| M35-B  | 02-Oct-2012 18:42:30 | 02-Oct-2012 18:47:30 | < 5 min  |
| M35-B  | 12-Oct-2012 06:57:30 | 21-Dec-2012 15:42:30 | 70.4 day |
| M35-B  | 03-Apr-2013 00:02:30 | 29-May-2013 00:37:30 | 56.0 day |
| M35-B  | 23-Jul-2015 19:12:30 | 23-Jul-2015 23:57:30 | 4.7 hr   |
| M75-B  | 06-Sep-2012 18:37:30 | 06-Sep-2012 19:07:30 | 30 min   |
| M75-B  | 07-Sep-2012 21:47:30 | 11-Sep-2012 11:02:30 | 3.6 day  |
| M75-B  | 12-Sep-2012 01:07:30 | 12-Sep-2012 01:12:30 | < 5 min  |
| M75-B  | 18-Sep-2012 02:07:30 | 18-Sep-2012 02:12:30 | < 5 min  |
| M75-B  | 28-Sep-2012 16:07:30 | 28-Sep-2012 16:12:30 | < 5 min  |
| M75-B  | 02-Oct-2012 18:47:30 | 02-Oct-2012 18:52:30 | < 5 min  |
| M75-B  | 12-Oct-2012 06:57:30 | 30-Oct-2012 15:12:30 | 18.3 day |
| M75-B  | 13-Dec-2012 16:27:30 | 13-Dec-2012 16:32:30 | < 5 min  |
| M75-B  | 23-Dec-2012 00:02:30 | 23-Dec-2012 00:07:30 | < 5 min  |
| M75-B  | 24-Feb-2013 00:02:30 | 24-Feb-2013 00:07:30 | < 5 min  |
| M75-B  | 31-Mar-2013 00:02:30 | 31-Mar-2013 00:07:30 | < 5 min  |
| M75-B  | 04-Apr-2013 00:02:30 | 04-Apr-2013 00:07:30 | < 5 min  |
| HIGH-B | 06-Sep-2012 18:42:30 | 06-Sep-2012 19:32:30 | 50 min   |
| HIGH-B | 07-Sep-2012 19:57:30 | 11-Sep-2012 10:57:30 | 3.6 day  |
| HIGH-B | 12-Sep-2012 01:12:30 | 12-Sep-2012 01:17:30 | < 5 min  |
| HIGH-B | 21-Sep-2012 01:42:30 | 21-Sep-2012 01:52:30 | 10 min   |
| HIGH-B | 28-Sep-2012 15:57:30 | 28-Sep-2012 16:02:30 | < 5 min  |
| HIGH-B | 04-Oct-2012 15:52:30 | 04-Oct-2012 16:27:30 | 35 min   |
| HIGH-B | 25-Oct-2012 03:22:30 | 25-Oct-2012 23:57:30 | 20.6 hr  |
| HIGH-B | 30-Oct-2012 00:02:30 | 30-Oct-2012 16:27:30 | 16.4 hr  |
| HIGH-B | 28-Nov-2012 00:02:30 | 28-Nov-2012 00:07:30 | < 5 min  |
| HIGH-B | 21-Dec-2012 16:02:30 | 21-Dec-2012 16:07:30 | < 5 min  |
| HIGH-B | 31-Mar-2013 00:02:30 | 31-Mar-2013 00:07:30 | < 5 min  |
| HIGH-B | 29-May-2014 00:02:30 | 29-May-2014 00:07:30 | < 5 min  |

Table 9: MagEIS Aperture and Slit Dimensions and Angles (see Figure 8, right inset)

| UNIT    | $L$ , cm | $A_2$ , cm | $A_1$ , cm | $\Sigma_2$ , cm | $\Sigma_1$ , cm | $\theta_{min,2}$ | $\theta_{max,2}$ | $\theta_{min,1}$ | $\theta_{max,1}$ |
|---------|----------|------------|------------|-----------------|-----------------|------------------|------------------|------------------|------------------|
| LOW/MED | 6.6040   | 2.4917     | 1.6383     | 0.1753          | 0.4928          | 9.95°            | 11.42°           | 4.96°            | 9.17°            |
| HIGH    | 8.3808   | 3.1293     | 2.4536     | 0.2000          | 1.0000          | 9.91°            | 11.23°           | 4.96°            | 11.64°           |

Table 10: Chamber magnetic field scalings for each pixel used in the hybrid responses

| Unit <sup>a</sup>           | P0<br>[%] | P1<br>[%] | P2<br>[%] | P3<br>[%] | P4<br>[%] | P5<br>[%] | P6<br>[%] | P7<br>[%] | P8<br>[%] |
|-----------------------------|-----------|-----------|-----------|-----------|-----------|-----------|-----------|-----------|-----------|
| LOW-A                       | 106.5     | 106.5     | 102       | 106.5     | 106.5     | 106.5     | 106.5     | 106.5     | 106.5     |
| LOW-B                       | 106.5     | 106.5     | 104       | 104       | 104       | 102       | 102       | 102       | 102       |
| M35-A                       | 100       | 100       | 100       | 100       | 100       | 100       | 100       | 100       | 100       |
| M35-B                       | 104       | 104       | 104       | 104       | 103       | 103       | 101       | 101       | 101       |
| M75-A                       | 101       | 101       | 101       | 101       | 102       | 102       | 102       | 102       | 101       |
| M75-B                       | 103       | 103       | 103       | 103       | 103       | 103       | 102       | 102       | 101       |
| HIGH-A (before 03 Aug 2013) | 96        | 98        | 100       | 110       | X         | X         | X         | X         | X         |
| HIGH-A (after 03 Aug 2013)  | 94        | 96        | 102.5     | 111.5     | X         | X         | X         | X         | X         |
| HIGH-B (before 03 Aug 2013) | 94        | 98        | 105       | 110       | X         | X         | X         | X         | X         |
| HIGH-B (after 03 Aug 2013)  | 94        | 98        | 102.5     | 107       | X         | X         | X         | X         | X         |

<sup>a</sup>Each HIGH unit has two separate scalings to account for the threshold changes that took place between 03 Jul 2013 and 26 Sep 2013 (see Sect. 2.2)



## 733 **References**

- 734 Blake JB, Carranza PA, Claudepierre SG, Clemmons JH, Crain WR, Dotan Y, Fennell JF, Fuentes FH,  
735 Galvan RM, George JS, Henderson MG, Lalic M, Lin AY, Looper MD, Mabry DJ, Mazur JE, Mc-  
736 Carthy B, Nguyen CQ, O'Brien TP, Perez MA, Redding MT, Roeder JL, Salvaggio DJ, Sorensen GA,  
737 Spence HE, Yi S, Zakrzewski MP (2013) The Magnetic Electron Ion Spectrometer (MagEIS) Instru-  
738 ments Aboard the Radiation Belt Storm Probes (RBSP) Spacecraft. *Space Sci Rev* 179:383–421, DOI  
739 10.1007/s11214-013-9991-8
- 740 Claudepierre SG, O'Brien TP, Blake JB, Fennell JF, Roeder JL, Clemmons JH, Looper MD, Mazur JE,  
741 Mulligan TM, Spence HE, Reeves GD, Friedel RHW, Henderson MG, Larsen BA (2015) A background  
742 correction algorithm for Van Allen Probes MagEIS electron flux measurements. *J Geophys Res* 120:5703–  
743 5727, DOI 10.1002/2015JA021171
