# Supplementary material for: The Magnetic Electron Ion Spectrometer: A Review of On-Orbit Sensor Performance, Data, Operations, and Science
Source: PubMed Central journal article supplement (PMC8553741; doi:10.1007/s11214-021-00855-2), 2021-10-28
Supplement: 11214_2021_855_MOESM2_ESM.pdf [file 11214_2021_855_MOESM2_ESM.pdf]

# MagEIS Calibration Factors: Electron High Rates

June 18, 2021

Table 1 through Table 24 provide energy channel definitions and flux conversion factors for the high rate electron channels on both Probes.

## Probe A (LOW)

Table 1: Energy/Flux Calibration Factors for the High Rate Electron Channels. High rate LUT ID (LOW-A): 16896.

| CH # | PIX      | $E$<br>[keV] | $\Delta E (E_{lo}, E_{hi})$<br>[keV] | $\Delta E/E$<br>[%] | $G_0 \Delta E$<br>[cm <sup>2</sup> sr keV] | $G_0$<br>[cm <sup>2</sup> sr] | $\Delta G_0/G_0$<br>[%] |
|------|----------|--------------|--------------------------------------|---------------------|--------------------------------------------|-------------------------------|-------------------------|
| 0    | P1,P2    | 26           | 24 (17,41)                           | 92                  | 9.400E-02                                  | 3.917E-03                     | 4.5                     |
| 1    | P3,P4    | 63           | 49 (46,95)                           | 78                  | 1.300E-01                                  | 2.653E-03                     | 3.4                     |
| 2    | P5,P6,P7 | 126          | 109 (95,204)                         | 87                  | 1.990E-01                                  | 1.826E-03                     | 5.4                     |

Table 2: Energy/Flux Calibration Factors for the High Rate Electron Channels. High rate LUT ID (LOW-A): 16897.

| CH # | PIX         | $E$<br>[keV] | $\Delta E (E_{lo}, E_{hi})$<br>[keV] | $\Delta E/E$<br>[%] | $G_0 \Delta E$<br>[cm <sup>2</sup> sr keV] | $G_0$<br>[cm <sup>2</sup> sr] | $\Delta G_0/G_0$<br>[%] |
|------|-------------|--------------|--------------------------------------|---------------------|--------------------------------------------|-------------------------------|-------------------------|
| 0    | P2          | 33           | 16 (27,43)                           | 48                  | 5.470E-02                                  | 3.419E-03                     | 2.0                     |
| 1    | P3,P4       | 62           | 49 (46,95)                           | 79                  | 1.200E-01                                  | 2.449E-03                     | 3.3                     |
| 2    | P5,P6,P7,P8 | 128          | 141 (95,236)                         | 110                 | 1.900E-01                                  | 1.348E-03                     | 7.3                     |

Table 3: Energy/Flux Calibration Factors for the High Rate Electron Channels. High rate LUT ID (LOW-A): 16898.

| CH # | PIX         | $E$<br>[keV] | $\Delta E (E_{lo}, E_{hi})$<br>[keV] | $\Delta E/E$<br>[%] | $G_0 \Delta E$<br>[cm <sup>2</sup> sr keV] | $G_0$<br>[cm <sup>2</sup> sr] | $\Delta G_0/G_0$<br>[%] |
|------|-------------|--------------|--------------------------------------|---------------------|--------------------------------------------|-------------------------------|-------------------------|
| 0    | P2          | 32           | 13 (27,40)                           | 41                  | 4.490E-02                                  | 3.454E-03                     | 1.4                     |
| 1    | P3,P4       | 62           | 46 (46,92)                           | 74                  | 1.120E-01                                  | 2.435E-03                     | 3.1                     |
| 2    | P5,P6,P7,P8 | 129          | 152 (95,247)                         | 118                 | 2.080E-01                                  | 1.368E-03                     | 8.0                     |

Table 4: Energy/Flux Calibration Factors for the High Rate Electron Channels. High rate LUT ID (LOW-A): 16899.

| CH # | PIX | $E$<br>[keV] | $\Delta E (E_{lo}, E_{hi})$<br>[keV] | $\Delta E/E$<br>[%] | $G_0 \Delta E$<br>[cm <sup>2</sup> sr keV] | $G_0$<br>[cm <sup>2</sup> sr] | $\Delta G_0/G_0$<br>[%] |
|------|-----|--------------|--------------------------------------|---------------------|--------------------------------------------|-------------------------------|-------------------------|
| 0    | P2  | 33           | 14 (27,41)                           | 42                  | 4.800E-02                                  | 3.429E-03                     | 1.5                     |
| 1    | P3  | 54           | 20 (46,66)                           | 37                  | 5.730E-02                                  | 2.865E-03                     | 1.2                     |
| 2    | P4  | 78           | 24 (68,92)                           | 31                  | 6.056E-02                                  | 2.523E-03                     | 0.9                     |
| 3    | P5  | 108          | 31 (95,126)                          | 29                  | 6.880E-02                                  | 2.219E-03                     | 1.1                     |
| 4    | P6  | 143          | 38 (126,164)                         | 27                  | 7.350E-02                                  | 1.934E-03                     | 1.3                     |
| 5    | P7  | 182          | 40 (164,204)                         | 22                  | 6.900E-02                                  | 1.725E-03                     | 1.5                     |
| 6    | P8  | 223          | 41 (206,247)                         | 18                  | 5.980E-02                                  | 1.459E-03                     | 1.9                     |

# Probe A (M35)

Table 5: Energy/Flux Calibration Factors for the High Rate Electron Channels. High rate LUT ID (M35-A): 20992.

| CH # | PIX         | $E$<br>[keV] | $\Delta E (E_{lo}, E_{hi})$<br>[keV] | $\Delta E/E$<br>[%] | $G_0 \Delta E$<br>[cm <sup>2</sup> sr keV] | $G_0$<br>[cm <sup>2</sup> sr] | $\Delta G_0/G_0$<br>[%] |
|------|-------------|--------------|--------------------------------------|---------------------|--------------------------------------------|-------------------------------|-------------------------|
| 0    | P1          | 146          | 77 (112,189)                         | 53                  | 3.190E-01                                  | 4.143E-03                     | 3.7                     |
| 1    | P2,P3,P4    | 288          | 326 (189,515)                        | 113                 | 9.670E-01                                  | 2.966E-03                     | 6.7                     |
| 2    | P5,P6,P7,P8 | 684          | 601 (515,1116)                       | 88                  | 9.440E-01                                  | 1.571E-03                     | 6.7                     |

Table 6: Energy/Flux Calibration Factors for the High Rate Electron Channels. High rate LUT ID (M35-A): 20993.

| CH # | PIX      | $E$<br>[keV] | $\Delta E (E_{lo}, E_{hi})$<br>[keV] | $\Delta E/E$<br>[%] | $G_0 \Delta E$<br>[cm <sup>2</sup> sr keV] | $G_0$<br>[cm <sup>2</sup> sr] | $\Delta G_0/G_0$<br>[%] |
|------|----------|--------------|--------------------------------------|---------------------|--------------------------------------------|-------------------------------|-------------------------|
| 0    | P2,P3    | 260          | 198 (189,387)                        | 76                  | 6.060E-01                                  | 3.061E-03                     | 4.1                     |
| 1    | P4,P5    | 492          | 254 (392,646)                        | 52                  | 6.070E-01                                  | 2.390E-03                     | 2.3                     |
| 2    | P6,P7,P8 | 802          | 462 (654,1116)                       | 58                  | 6.830E-01                                  | 1.478E-03                     | 4.7                     |

Table 7: Energy/Flux Calibration Factors for the High Rate Electron Channels. High rate LUT ID (M35-A): 20994.

| CH # | PIX | $E$<br>[keV] | $\Delta E (E_{lo}, E_{hi})$<br>[keV] | $\Delta E/E$<br>[%] | $G_0 \Delta E$<br>[cm <sup>2</sup> sr keV] | $G_0$<br>[cm <sup>2</sup> sr] | $\Delta G_0/G_0$<br>[%] |
|------|-----|--------------|--------------------------------------|---------------------|--------------------------------------------|-------------------------------|-------------------------|
| 0    | P2  | 230          | 86 (189,275)                         | 37                  | 3.080E-01                                  | 3.581E-03                     | 2.0                     |
| 1    | P3  | 334          | 102 (285,387)                        | 31                  | 3.220E-01                                  | 3.157E-03                     | 1.3                     |
| 2    | P4  | 454          | 123 (392,515)                        | 27                  | 3.240E-01                                  | 2.634E-03                     | 1.2                     |
| 3    | P5  | 584          | 139 (515,654)                        | 24                  | 3.070E-01                                  | 2.209E-03                     | 1.1                     |
| 4    | P6  | 724          | 148 (654,802)                        | 20                  | 2.835E-01                                  | 1.916E-03                     | 1.0                     |
| 5    | P7  | 879          | 161 (802,963)                        | 18                  | 2.520E-01                                  | 1.565E-03                     | 1.0                     |
| 6    | P8  | 1031         | 153 (963,1116)                       | 15                  | 2.020E-01                                  | 1.320E-03                     | 1.5                     |

## Probe A (M75)

Table 8: Energy/Flux Calibration Factors for the High Rate Electron Channels. High rate LUT ID (M75-A): 25088.

| CH # | PIX         | $E$<br>[keV] | $\Delta E (E_{lo}, E_{hi})$<br>[keV] | $\Delta E/E$<br>[%] | $G_0 \Delta E$<br>[cm <sup>2</sup> sr keV] | $G_0$<br>[cm <sup>2</sup> sr] | $\Delta G_0/G_0$<br>[%] |
|------|-------------|--------------|--------------------------------------|---------------------|--------------------------------------------|-------------------------------|-------------------------|
| 0    | P0,P1       | 127          | 109 (85,194)                         | 86                  | 3.680E-01                                  | 3.376E-03                     | 6.4                     |
| 1    | P2,P3,P4    | 295          | 333 (194,527)                        | 113                 | 9.720E-01                                  | 2.919E-03                     | 6.7                     |
| 2    | P5,P6,P7,P8 | 700          | 596 (533,1129)                       | 85                  | 9.810E-01                                  | 1.646E-03                     | 6.6                     |

Table 9: Energy/Flux Calibration Factors for the High Rate Electron Channels. High rate LUT ID (M75-A): 25089.

| CH # | PIX      | $E$<br>[keV] | $\Delta E (E_{lo}, E_{hi})$<br>[keV] | $\Delta E/E$<br>[%] | $G_0 \Delta E$<br>[cm <sup>2</sup> sr keV] | $G_0$<br>[cm <sup>2</sup> sr] | $\Delta G_0/G_0$<br>[%] |
|------|----------|--------------|--------------------------------------|---------------------|--------------------------------------------|-------------------------------|-------------------------|
| 0    | P2,P3    | 269          | 202 (194,396)                        | 75                  | 6.860E-01                                  | 3.396E-03                     | 4.3                     |
| 1    | P4,P5    | 509          | 264 (405,669)                        | 52                  | 6.470E-01                                  | 2.451E-03                     | 2.3                     |
| 2    | P6,P7,P8 | 821          | 460 (669,1129)                       | 56                  | 7.220E-01                                  | 1.570E-03                     | 4.8                     |

Table 10: Energy/Flux Calibration Factors for the High Rate Electron Channels. High rate LUT ID (M75-A): 25090.

| CH # | PIX      | $E$<br>[keV] | $\Delta E (E_{lo}, E_{hi})$<br>[keV] | $\Delta E/E$<br>[%] | $G_0 \Delta E$<br>[cm <sup>2</sup> sr keV] | $G_0$<br>[cm <sup>2</sup> sr] | $\Delta G_0/G_0$<br>[%] |
|------|----------|--------------|--------------------------------------|---------------------|--------------------------------------------|-------------------------------|-------------------------|
| 0    | P2,P3    | 266          | 202 (194,396)                        | 76                  | 6.350E-01                                  | 3.144E-03                     | 4.1                     |
| 1    | P4,P5    | 509          | 256 (405,661)                        | 50                  | 6.160E-01                                  | 2.406E-03                     | 2.2                     |
| 2    | P6,P7,P8 | 821          | 473 (669,1142)                       | 58                  | 6.840E-01                                  | 1.446E-03                     | 4.9                     |

Table 11: Energy/Flux Calibration Factors for the High Rate Electron Channels. High rate LUT ID (M75-A): 25091.

| CH # | PIX   | $E$<br>[keV] | $\Delta E (E_{lo}, E_{hi})$<br>[keV] | $\Delta E/E$<br>[%] | $G_0 \Delta E$<br>[cm <sup>2</sup> sr keV] | $G_0$<br>[cm <sup>2</sup> sr] | $\Delta G_0/G_0$<br>[%] |
|------|-------|--------------|--------------------------------------|---------------------|--------------------------------------------|-------------------------------|-------------------------|
| 0    | P2    | 235          | 91 (194,285)                         | 39                  | 3.260E-01                                  | 3.582E-03                     | 2.1                     |
| 1    | P3    | 342          | 108 (288,396)                        | 32                  | 3.270E-01                                  | 3.028E-03                     | 1.3                     |
| 2    | P4    | 465          | 128 (405,533)                        | 28                  | 3.280E-01                                  | 2.563E-03                     | 1.1                     |
| 3    | P5,P6 | 646          | 288 (533,821)                        | 45                  | 5.710E-01                                  | 1.983E-03                     | 2.5                     |
| 4    | P7,P8 | 941          | 321 (821,1142)                       | 34                  | 4.440E-01                                  | 1.383E-03                     | 3.0                     |

Table 12: Energy/Flux Calibration Factors for the High Rate Electron Channels. High rate LUT ID (M75-A): 25092.

| CH # | PIX | $E$<br>[keV] | $\Delta E (E_{lo}, E_{hi})$<br>[keV] | $\Delta E/E$<br>[%] | $G_0 \Delta E$<br>[cm <sup>2</sup> sr keV] | $G_0$<br>[cm <sup>2</sup> sr] | $\Delta G_0/G_0$<br>[%] |
|------|-----|--------------|--------------------------------------|---------------------|--------------------------------------------|-------------------------------|-------------------------|
| 0    | P2  | 235          | 91 (194,285)                         | 39                  | 3.260E-01                                  | 3.582E-03                     | 2.1                     |
| 1    | P3  | 342          | 108 (288,396)                        | 32                  | 3.270E-01                                  | 3.028E-03                     | 1.3                     |
| 2    | P4  | 465          | 128 (405,533)                        | 28                  | 3.280E-01                                  | 2.563E-03                     | 1.1                     |
| 3    | P5  | 597          | 136 (533,669)                        | 23                  | 3.020E-01                                  | 2.221E-03                     | 1.0                     |
| 4    | P6  | 741          | 152 (669,821)                        | 21                  | 2.810E-01                                  | 1.849E-03                     | 1.1                     |
| 5    | P7  | 899          | 164 (821,985)                        | 18                  | 2.500E-01                                  | 1.524E-03                     | 1.1                     |
| 6    | P8  | 1054         | 168 (974,1142)                       | 16                  | 2.130E-01                                  | 1.268E-03                     | 1.1                     |

## Probe B (LOW)



Table 13: Energy/Flux Calibration Factors for the High Rate Electron Channels. High rate LUT ID (LOW-B): 18944.

| CH # | PIX      | $E$<br>[keV] | $\Delta E (E_{lo}, E_{hi})$<br>[keV] | $\Delta E/E$<br>[%] | $G_0 \Delta E$<br>[cm <sup>2</sup> sr keV] | $G_0$<br>[cm <sup>2</sup> sr] | $\Delta G_0/G_0$<br>[%] |
|------|----------|--------------|--------------------------------------|---------------------|--------------------------------------------|-------------------------------|-------------------------|
| 0    | P1,P2    | 28           | 24 (20,44)                           | 86                  | 9.070E-02                                  | 3.779E-03                     | 3.9                     |
| 1    | P3,P4    | 61           | 47 (44,91)                           | 77                  | 1.220E-01                                  | 2.596E-03                     | 3.2                     |
| 2    | P5,P6,P7 | 117          | 102 (88,190)                         | 87                  | 1.860E-01                                  | 1.824E-03                     | 5.1                     |

Table 14: Energy/Flux Calibration Factors for the High Rate Electron Channels. High rate LUT ID (LOW-B): 18945.

| H # | PIX         | $E$<br>[keV] | $\Delta E (E_{lo}, E_{hi})$<br>[keV] | $\Delta E/E$<br>[%] | $G_0 \Delta E$<br>[cm <sup>2</sup> sr keV] | $G_0$<br>[cm <sup>2</sup> sr] | $\Delta G_0/G_0$<br>[%] |
|-----|-------------|--------------|--------------------------------------|---------------------|--------------------------------------------|-------------------------------|-------------------------|
| 0   | P2          | 35           | 16 (28,44)                           | 46                  | 5.000E-02                                  | 3.125E-03                     | 1.4                     |
| 1   | P3,P4       | 60           | 43 (45,88)                           | 72                  | 1.060E-01                                  | 2.465E-03                     | 2.9                     |
| 2   | P5,P6,P7,P8 | 117          | 120 (88,208)                         | 103                 | 1.650E-01                                  | 1.375E-03                     | 5.2                     |

Table 15: Energy/Flux Calibration Factors for the High Rate Electron Channels. High rate LUT ID (LOW-B): 18946.

| CH # | PIX         | $E$<br>[keV] | $\Delta E (E_{lo}, E_{hi})$<br>[keV] | $\Delta E/E$<br>[%] | $G_0 \Delta E$<br>[cm <sup>2</sup> sr keV] | $G_0$<br>[cm <sup>2</sup> sr] | $\Delta G_0/G_0$<br>[%] |
|------|-------------|--------------|--------------------------------------|---------------------|--------------------------------------------|-------------------------------|-------------------------|
| 0    | P2          | 33           | 12 (28,40)                           | 36                  | 4.280E-02                                  | 3.567E-03                     | 1.4                     |
| 1    | P3,P4       | 59           | 44 (44,88)                           | 75                  | 1.080E-01                                  | 2.455E-03                     | 3.0                     |
| 2    | P5,P6,P7,P8 | 121          | 143 (88,231)                         | 118                 | 2.020E-01                                  | 1.413E-03                     | 7.3                     |

Table 16: Energy/Flux Calibration Factors for the High Rate Electron Channels. High rate LUT ID (LOW-B): 18947.

| CH # | PIX | $E$<br>[keV] | $\Delta E (E_{lo}, E_{hi})$<br>[keV] | $\Delta E/E$<br>[%] | $G_0 \Delta E$<br>[cm <sup>2</sup> sr keV] | $G_0$<br>[cm <sup>2</sup> sr] | $\Delta G_0/G_0$<br>[%] |
|------|-----|--------------|--------------------------------------|---------------------|--------------------------------------------|-------------------------------|-------------------------|
| 0    | P2  | 33           | 11 (28,39)                           | 33                  | 3.960E-02                                  | 3.600E-03                     | 1.4                     |
| 1    | P3  | 53           | 19 (44,63)                           | 36                  | 5.470E-02                                  | 2.879E-03                     | 1.0                     |
| 2    | P4  | 76           | 24 (65,89)                           | 32                  | 5.928E-02                                  | 2.470E-03                     | 0.8                     |
| 3    | P5  | 101          | 29 (88,117)                          | 29                  | 6.605E-02                                  | 2.278E-03                     | 0.8                     |
| 4    | P6  | 132          | 33 (117,150)                         | 25                  | 6.460E-02                                  | 1.958E-03                     | 0.9                     |
| 5    | P7  | 168          | 36 (152,188)                         | 21                  | 6.230E-02                                  | 1.731E-03                     | 1.2                     |
| 6    | P8  | 208          | 38 (193,231)                         | 18                  | 5.960E-02                                  | 1.568E-03                     | 1.4                     |

## Probe B (M35)

Table 17: Energy/Flux Calibration Factors for the High Rate Electron Channels. High rate LUT ID (M35-B): 39424.

| CH # | PIX         | $E$ [keV] | $\Delta E (E_{lo}, E_{hi})$ [keV] | $\Delta E/E$ [%] | $G_0 \Delta E$ [cm <sup>2</sup> sr keV] | $G_0$ [cm <sup>2</sup> sr] | $\Delta G_0/G_0$ [%] |
|------|-------------|-----------|-----------------------------------|------------------|-----------------------------------------|----------------------------|----------------------|
| 0    | P0,P1       | 136       | 115 (90,205)                      | 85               | 4.110E-01                               | 3.574E-03                  | 6.0                  |
| 1    | P2,P3,P4    | 305       | 330 (203,533)                     | 108              | 1.040E+00                               | 3.152E-03                  | 6.3                  |
| 2    | P5,P6,P7,P8 | 708       | 571 (545,1116)                    | 81               | 1.020E+00                               | 1.786E-03                  | 6.4                  |

Table 18: Energy/Flux Calibration Factors for the High Rate Electron Channels. High rate LUT ID (M35-B): 39425.

| CH # | PIX      | $E$ [keV] | $\Delta E (E_{lo}, E_{hi})$ [keV] | $\Delta E/E$ [%] | $G_0 \Delta E$ [cm <sup>2</sup> sr keV] | $G_0$ [cm <sup>2</sup> sr] | $\Delta G_0/G_0$ [%] |
|------|----------|-----------|-----------------------------------|------------------|-----------------------------------------|----------------------------|----------------------|
| 0    | P2,P3    | 282       | 207 (203,410)                     | 73               | 6.830E-01                               | 3.300E-03                  | 4.0                  |
| 1    | P4,P5    | 515       | 262 (415,677)                     | 51               | 6.120E-01                               | 2.336E-03                  | 2.4                  |
| 2    | P6,P7,P8 | 821       | 473 (669,1142)                    | 58               | 6.720E-01                               | 1.421E-03                  | 4.9                  |

Table 19: Energy/Flux Calibration Factors for the High Rate Electron Channels. High rate LUT ID (M35-B): 39426.

| CH # | PIX | $E$ [keV] | $\Delta E (E_{lo}, E_{hi})$ [keV] | $\Delta E/E$ [%] | $G_0 \Delta E$ [cm <sup>2</sup> sr keV] | $G_0$ [cm <sup>2</sup> sr] | $\Delta G_0/G_0$ [%] |
|------|-----|-----------|-----------------------------------|------------------|-----------------------------------------|----------------------------|----------------------|
| 0    | P2  | 249       | 95 (203,298)                      | 38               | 3.510E-01                               | 3.695E-03                  | 2.0                  |
| 1    | P3  | 358       | 110 (305,415)                     | 31               | 3.550E-01                               | 3.227E-03                  | 1.4                  |
| 2    | P4  | 475       | 124 (415,539)                     | 26               | 3.250E-01                               | 2.621E-03                  | 1.1                  |
| 3    | P5  | 604       | 138 (539,677)                     | 23               | 3.090E-01                               | 2.239E-03                  | 1.2                  |
| 4    | P6  | 741       | 143 (669,812)                     | 19               | 2.670E-01                               | 1.867E-03                  | 1.0                  |
| 5    | P7  | 889       | 162 (812,974)                     | 18               | 2.470E-01                               | 1.525E-03                  | 1.1                  |
| 6    | P8  | 1054      | 168 (974,1142)                    | 16               | 2.160E-01                               | 1.286E-03                  | 1.0                  |

## Probe B (M75)

Table 20: Energy/Flux Calibration Factors for the High Rate Electron Channels. High rate LUT ID (M75-B): 27136.

| CH # | PIX         | $E$<br>[keV] | $\Delta E (E_{lo}, E_{hi})$<br>[keV] | $\Delta E/E$<br>[%] | $G_0 \Delta E$<br>[cm <sup>2</sup> sr keV] | $G_0$<br>[cm <sup>2</sup> sr] | $\Delta G_0/G_0$<br>[%] |
|------|-------------|--------------|--------------------------------------|---------------------|--------------------------------------------|-------------------------------|-------------------------|
| 0    | P0,P1       | 141          | 110 (90,200)                         | 78                  | 3.670E-01                                  | 3.336E-03                     | 5.2                     |
| 1    | P2,P3,P4    | 302          | 327 (200,527)                        | 108                 | 9.640E-01                                  | 2.948E-03                     | 6.3                     |
| 2    | P5,P6,P7,P8 | 700          | 564 (539,1103)                       | 81                  | 9.470E-01                                  | 1.679E-03                     | 6.0                     |

Table 21: Energy/Flux Calibration Factors for the High Rate Electron Channels. High rate LUT ID (M75-B): 27137.

| CH # | PIX      | $E$<br>[keV] | $\Delta E (E_{lo}, E_{hi})$<br>[keV] | $\Delta E/E$<br>[%] | $G_0 \Delta E$<br>[cm <sup>2</sup> sr keV] | $G_0$<br>[cm <sup>2</sup> sr] | $\Delta G_0/G_0$<br>[%] |
|------|----------|--------------|--------------------------------------|---------------------|--------------------------------------------|-------------------------------|-------------------------|
| 0    | P2,P3    | 275          | 210 (200,410)                        | 76                  | 6.790E-01                                  | 3.233E-03                     | 4.2                     |
| 1    | P4,P5    | 515          | 267 (410,677)                        | 52                  | 6.380E-01                                  | 2.390E-03                     | 2.4                     |
| 2    | P6,P7,P8 | 812          | 434 (669,1103)                       | 53                  | 6.690E-01                                  | 1.541E-03                     | 4.6                     |

Table 22: Energy/Flux Calibration Factors for the High Rate Electron Channels. High rate LUT ID (M75-B): 27138.

| CH # | PIX      | $E$<br>[keV] | $\Delta E (E_{lo}, E_{hi})$<br>[keV] | $\Delta E/E$<br>[%] | $G_0 \Delta E$<br>[cm <sup>2</sup> sr keV] | $G_0$<br>[cm <sup>2</sup> sr] | $\Delta G_0/G_0$<br>[%] |
|------|----------|--------------|--------------------------------------|---------------------|--------------------------------------------|-------------------------------|-------------------------|
| 0    | P2,P3    | 275          | 205 (200,405)                        | 75                  | 6.270E-01                                  | 3.059E-03                     | 3.9                     |
| 1    | P4,P5    | 515          | 254 (415,669)                        | 49                  | 6.170E-01                                  | 2.429E-03                     | 2.2                     |
| 2    | P6,P7,P8 | 821          | 447 (669,1116)                       | 54                  | 6.590E-01                                  | 1.474E-03                     | 4.6                     |

Table 23: Energy/Flux Calibration Factors for the High Rate Electron Channels. High rate LUT ID (M75-B): 27139.

| CH # | PIX   | $E$<br>[keV] | $\Delta E (E_{lo}, E_{hi})$<br>[keV] | $\Delta E/E$<br>[%] | $G_0 \Delta E$<br>[cm <sup>2</sup> sr keV] | $G_0$<br>[cm <sup>2</sup> sr] | $\Delta G_0/G_0$<br>[%] |
|------|-------|--------------|--------------------------------------|---------------------|--------------------------------------------|-------------------------------|-------------------------|
| 0    | P2    | 243          | 92 (200,292)                         | 38                  | 3.300E-01                                  | 3.587E-03                     | 2.1                     |
| 1    | P3    | 350          | 107 (298,405)                        | 31                  | 3.330E-01                                  | 3.112E-03                     | 1.4                     |
| 2    | P4    | 470          | 118 (415,533)                        | 25                  | 3.210E-01                                  | 2.720E-03                     | 1.2                     |
| 3    | P5,P6 | 646          | 282 (539,821)                        | 44                  | 5.580E-01                                  | 1.979E-03                     | 2.4                     |
| 4    | P7,P8 | 941          | 295 (821,1116)                       | 31                  | 4.240E-01                                  | 1.437E-03                     | 2.5                     |

Table 24: Energy/Flux Calibration Factors for the High Rate Electron Channels. High rate LUT ID (M75-B): 27140.

| CH # | PIX | $E$<br>[keV] | $\Delta E (E_{lo}, E_{hi})$<br>[keV] | $\Delta E/E$<br>[%] | $G_0 \Delta E$<br>[cm <sup>2</sup> sr keV] | $G_0$<br>[cm <sup>2</sup> sr] | $\Delta G_0/G_0$<br>[%] |
|------|-----|--------------|--------------------------------------|---------------------|--------------------------------------------|-------------------------------|-------------------------|
| 0    | P2  | 243          | 92 (200,292)                         | 38                  | 3.300E-01                                  | 3.587E-03                     | 2.1                     |
| 1    | P3  | 350          | 107 (298,405)                        | 31                  | 3.330E-01                                  | 3.112E-03                     | 1.4                     |
| 2    | P4  | 470          | 118 (415,533)                        | 25                  | 3.210E-01                                  | 2.720E-03                     | 1.2                     |
| 3    | P5  | 604          | 130 (539,669)                        | 22                  | 3.009E-01                                  | 2.315E-03                     | 1.0                     |
| 4    | P6  | 741          | 152 (669,821)                        | 21                  | 2.760E-01                                  | 1.816E-03                     | 1.1                     |
| 5    | P7  | 899          | 164 (821,985)                        | 18                  | 2.470E-01                                  | 1.506E-03                     | 1.0                     |
| 6    | P8  | 1054         | 142 (974,1116)                       | 13                  | 1.930E-01                                  | 1.359E-03                     | 1.5                     |
