# Supplementary material for: The Magnetic Electron Ion Spectrometer: A Review of On-Orbit Sensor Performance, Data, Operations, and Science
Source: PubMed Central journal article supplement (PMC8553741; doi:10.1007/s11214-021-00855-2), 2021-10-28
Supplement: 11214_2021_855_MOESM3_ESM.pdf [file 11214_2021_855_MOESM3_ESM.pdf]

# MagEIS Calibration Factors: Electron Histograms

June 18, 2021

Table 1 through Table 16 provide energy channel definitions and flux conversion factors for the histogram electron channels on both Probes.

Probe A (LOW)

Table 1: Energy/Flux Calibration Factors for the Histogram Electron Channels. Histogram LUT ID (LOW-A): 16641.

| CH # | PIX | $E$ [keV] | $\Delta E (E_{lo}, E_{hi})$ [keV] | $\Delta E/E$ [%] | $G_0 \Delta E$ [cm <sup>2</sup> sr keV] | $G_0$ [cm <sup>2</sup> sr] | $\Delta G_0/G_0$ [%] |
|------|-----|-----------|-----------------------------------|------------------|-----------------------------------------|----------------------------|----------------------|
| 0    | P1  | 21.2      | 1.5 (20.2,21.7)                   | 7.1              | 4.383E-03                               | 2.922E-03                  | 0.8                  |
| 1    | P1  | 22.4      | 1.3 (21.4,22.7)                   | 5.8              | 4.412E-03                               | 3.394E-03                  | 0.5                  |
| 2    | P1  | 23.5      | 1.6 (22.4,24.0)                   | 6.8              | 4.366E-03                               | 2.729E-03                  | 0.5                  |
| 3    | P1  | 24.6      | 1.6 (23.5,25.1)                   | 6.5              | 4.337E-03                               | 2.711E-03                  | 0.5                  |
| 4    | P1  | 25.7      | 1.4 (24.6,26.0)                   | 5.4              | 4.254E-03                               | 3.039E-03                  | 0.5                  |
| 5    | P2  | 30.8      | 1.4 (29.8,31.2)                   | 4.5              | 3.798E-03                               | 2.713E-03                  | 0.5                  |
| 6    | P2  | 31.9      | 1.5 (30.8,32.3)                   | 4.7              | 3.872E-03                               | 2.581E-03                  | 0.5                  |
| 7    | P2  | 33.0      | 1.5 (31.9,33.4)                   | 4.5              | 3.889E-03                               | 2.593E-03                  | 0.5                  |
| 8    | P2  | 34.2      | 1.6 (33.0,34.6)                   | 4.7              | 3.855E-03                               | 2.409E-03                  | 0.7                  |
| 9    | P2  | 34.9      | 1.1 (34.2,35.3)                   | 3.2              | 3.805E-03                               | 3.459E-03                  | 0.6                  |
| 10   | P2  | 36.2      | 1.7 (34.9,36.6)                   | 4.7              | 3.798E-03                               | 2.234E-03                  | 0.4                  |
| 11   | P2  | 37.4      | 1.6 (36.2,37.8)                   | 4.3              | 3.823E-03                               | 2.389E-03                  | 0.6                  |
| 12   | P2  | 38.3      | 1.7 (37.0,38.7)                   | 4.4              | 3.701E-03                               | 2.177E-03                  | 0.4                  |
| 13   | P3  | 52.0      | 1.7 (50.9,52.6)                   | 3.3              | 3.394E-03                               | 1.996E-03                  | 0.3                  |
| 14   | P3  | 53.2      | 1.8 (52.0,53.8)                   | 3.4              | 3.483E-03                               | 1.935E-03                  | 0.3                  |
| 15   | P3  | 54.5      | 1.3 (53.2,54.5)                   | 2.4              | 3.491E-03                               | 2.685E-03                  | 0.5                  |
| 16   | P3  | 55.1      | 1.9 (53.8,55.7)                   | 3.4              | 3.410E-03                               | 1.795E-03                  | 0.7                  |
| 17   | P3  | 56.4      | 1.9 (55.1,57.0)                   | 3.4              | 3.401E-03                               | 1.790E-03                  | 0.4                  |
| 18   | P3  | 57.6      | 1.9 (56.4,58.3)                   | 3.3              | 3.422E-03                               | 1.801E-03                  | 0.2                  |
| 19   | P3  | 59.0      | 1.4 (57.6,59.0)                   | 2.4              | 3.433E-03                               | 2.452E-03                  | 0.6                  |
| 20   | P3  | 59.7      | 2.0 (58.3,60.3)                   | 3.4              | 3.359E-03                               | 1.680E-03                  | 0.5                  |
| 21   | P3  | 61.0      | 1.3 (59.7,61.0)                   | 2.1              | 3.347E-03                               | 2.575E-03                  | 0.2                  |
| 22   | P3  | 61.7      | 2.1 (60.3,62.4)                   | 3.4              | 3.305E-03                               | 1.574E-03                  | 0.7                  |
| 23   | P3  | 63.1      | 2.2 (61.7,63.9)                   | 3.5              | 3.359E-03                               | 1.527E-03                  | 0.3                  |
| 24   | P4  | 74.0      | 2.5 (72.4,74.9)                   | 3.4              | 5.791E-03                               | 2.316E-03                  | 0.3                  |
| 25   | P4  | 76.6      | 3.5 (74.0,77.5)                   | 4.6              | 6.050E-03                               | 1.729E-03                  | 0.4                  |
| 26   | P4  | 78.4      | 2.7 (76.6,79.3)                   | 3.4              | 5.993E-03                               | 2.220E-03                  | 0.5                  |
| 27   | P4  | 81.1      | 3.6 (78.4,82.0)                   | 4.4              | 6.031E-03                               | 1.675E-03                  | 0.4                  |
| 28   | P4  | 83.0      | 2.8 (81.1,83.9)                   | 3.4              | 5.883E-03                               | 2.101E-03                  | 0.4                  |
| 29   | P4  | 85.8      | 3.8 (83.0,86.8)                   | 4.4              | 5.958E-03                               | 1.568E-03                  | 0.6                  |
| 30   | P4  | 87.8      | 3.0 (85.8,88.8)                   | 3.4              | 5.854E-03                               | 1.951E-03                  | 0.3                  |
| 31   | P4  | 89.8      | 3.1 (87.8,90.9)                   | 3.5              | 5.771E-03                               | 1.862E-03                  | 0.2                  |
| 32   | P5  | 102.0     | 3.5 (99.5,103.0)                  | 3.4              | 5.227E-03                               | 1.493E-03                  | 0.2                  |
| 33   | P5  | 104.0     | 3.0 (102.0,105.0)                 | 2.9              | 5.467E-03                               | 1.822E-03                  | 0.2                  |
| 34   | P5  | 107.0     | 4.0 (104.0,108.0)                 | 3.7              | 5.465E-03                               | 1.366E-03                  | 0.5                  |
| 35   | P5  | 109.0     | 2.0 (107.0,109.0)                 | 1.8              | 5.476E-03                               | 2.738E-03                  | 0.7                  |
| 36   | P5  | 110.0     | 4.0 (108.0,112.0)                 | 3.6              | 5.413E-03                               | 1.353E-03                  | 0.5                  |
| 37   | P5  | 113.0     | 4.0 (110.0,114.0)                 | 3.5              | 5.330E-03                               | 1.332E-03                  | 0.2                  |
| 38   | P5  | 115.0     | 4.0 (113.0,117.0)                 | 3.5              | 5.287E-03                               | 1.322E-03                  | 0.4                  |
| 39   | P6  | 137.0     | 4.0 (134.0,138.0)                 | 2.9              | 4.759E-03                               | 1.190E-03                  | 0.2                  |
| 40   | P6  | 140.0     | 3.0 (137.0,140.0)                 | 2.1              | 4.920E-03                               | 1.640E-03                  | 0.9                  |
| 41   | P6  | 142.0     | 5.0 (138.0,143.0)                 | 3.5              | 4.786E-03                               | 9.572E-04                  | 0.2                  |
| 42   | P6  | 143.0     | 3.0 (142.0,145.0)                 | 2.1              | 4.772E-03                               | 1.591E-03                  | 0.5                  |
| 43   | P6  | 146.5     | 3.3 (143.2,146.5)                 | 2.3              | 4.773E-03                               | 1.446E-03                  | 0.6                  |
| 44   | P6  | 148.0     | 5.0 (145.0,150.0)                 | 3.4              | 4.693E-03                               | 9.386E-04                  | 0.2                  |
| 45   | P7  | 175.8     | 4.0 (171.8,175.8)                 | 2.3              | 4.090E-03                               | 1.022E-03                  | 1.1                  |
| 46   | P7  | 178.0     | 4.0 (174.0,178.0)                 | 2.2              | 4.103E-03                               | 1.026E-03                  | 0.9                  |
| 47   | P7  | 180.0     | 6.0 (176.0,182.0)                 | 3.3              | 4.132E-03                               | 6.887E-04                  | 0.7                  |
| 48   | P7  | 182.0     | 6.0 (178.0,184.0)                 | 3.3              | 4.076E-03                               | 6.793E-04                  | 0.6                  |
| 49   | P7  | 184.0     | 6.0 (180.0,186.0)                 | 3.3              | 4.055E-03                               | 6.758E-04                  | 0.4                  |
| 50   | P7  | 186.0     | 6.0 (182.0,188.0)                 | 3.2              | 3.991E-03                               | 6.652E-04                  | 0.4                  |
| 51   | P7  | 188.0     | 6.0 (184.0,190.0)                 | 3.2              | 3.976E-03                               | 6.627E-04                  | 0.2                  |
| 52   | P7  | 190.0     | 7.0 (186.0,193.0)                 | 3.7              | 3.959E-03                               | 5.656E-04                  | 0.2                  |
| 53   | P7  | 193.0     | 7.0 (188.0,195.0)                 | 3.6              | 3.880E-03                               | 5.543E-04                  | 0.2                  |
| 54   | P7  | 195.0     | 7.0 (190.0,197.0)                 | 3.6              | 3.998E-03                               | 5.711E-04                  | 0.3                  |
| 55   | P8  | 214.9     | 6.8 (211.2,218.0)                 | 3.2              | 3.485E-03                               | 5.125E-04                  | 0.9                  |
| 56   | P8  | 217.1     | 4.7 (213.5,218.2)                 | 2.2              | 3.550E-03                               | 7.553E-04                  | 1.2                  |
| 57   | P8  | 219.4     | 5.2 (215.8,221.0)                 | 2.4              | 3.480E-03                               | 6.692E-04                  | 1.5                  |
| 58   | P8  | 221.6     | 5.0 (218.0,223.0)                 | 2.3              | 3.590E-03                               | 7.180E-04                  | 1.2                  |
| 59   | P8  | 223.9     | 5.7 (220.3,226.0)                 | 2.5              | 3.587E-03                               | 6.293E-04                  | 1.0                  |
| 60   | P8  | 226.1     | 5.4 (222.6,228.0)                 | 2.4              | 3.623E-03                               | 6.709E-04                  | 0.9                  |
| 61   | P8  | 228.4     | 6.2 (224.8,231.0)                 | 2.7              | 3.619E-03                               | 5.837E-04                  | 0.4                  |

|    |    |       |                   |     |           |           |     |
|----|----|-------|-------------------|-----|-----------|-----------|-----|
| 62 | P8 | 230.6 | 6.9 (227.1,234.0) | 3.0 | 3.617E-03 | 5.242E-04 | 0.3 |
| 63 | P8 | 232.9 | 6.7 (229.3,236.0) | 2.9 | 3.634E-03 | 5.424E-04 | 0.8 |
| 64 | P8 | 235.1 | 4.7 (231.6,236.3) | 2.0 | 3.580E-03 | 7.617E-04 | 1.3 |
| 65 | P8 | 237.4 | 5.1 (233.9,239.0) | 2.1 | 3.370E-03 | 6.608E-04 | 1.4 |
| 66 | P8 | 239.6 | 5.9 (236.1,242.0) | 2.5 | 3.461E-03 | 5.866E-04 | 0.9 |
| 67 | P8 | 241.9 | 5.6 (238.4,244.0) | 2.3 | 3.452E-03 | 6.164E-04 | 0.6 |
| 68 | P8 | 244.1 | 6.3 (240.7,247.0) | 2.6 | 3.481E-03 | 5.525E-04 | 0.3 |
| 69 | P8 | 246.4 | 7.1 (242.9,250.0) | 2.9 | 3.490E-03 | 4.915E-04 | 1.1 |

Table 2: Energy/Flux Calibration Factors for the Histogram Electron Channels. Histogram LUT ID (LOW-A): 16642.

| CH # | PIX | $E$ [keV] | $\Delta E (E_{lo}, E_{hi})$ [keV] | $\Delta E/E$ [%] | $G_0 \Delta E$ [cm <sup>2</sup> sr keV] | $G_0$ [cm <sup>2</sup> sr] | $\Delta G_0/G_0$ [%] |
|------|-----|-----------|-----------------------------------|------------------|-----------------------------------------|----------------------------|----------------------|
| 0    | P1  | 19.6      | 2.4 (18.1,20.5)                   | 12.2             | 8.578E-03                               | 3.574E-03                  | 0.8                  |
| 1    | P1  | 21.7      | 2.5 (20.2,22.7)                   | 11.5             | 8.717E-03                               | 3.487E-03                  | 0.9                  |
| 2    | P1  | 24.0      | 2.7 (22.4,25.1)                   | 11.3             | 8.715E-03                               | 3.228E-03                  | 0.5                  |
| 3    | P1  | 26.3      | 2.6 (24.6,27.2)                   | 9.9              | 8.134E-03                               | 3.128E-03                  | 0.7                  |
| 4    | P2  | 31.2      | 2.5 (29.8,32.3)                   | 8.0              | 7.595E-03                               | 3.038E-03                  | 0.5                  |
| 5    | P2  | 33.4      | 2.7 (31.9,34.6)                   | 8.1              | 7.689E-03                               | 2.848E-03                  | 0.4                  |
| 6    | P2  | 35.8      | 2.4 (34.2,36.6)                   | 6.7              | 7.671E-03                               | 3.196E-03                  | 0.7                  |
| 7    | P2  | 37.8      | 2.5 (36.2,38.7)                   | 6.6              | 7.535E-03                               | 3.014E-03                  | 0.4                  |
| 8    | P3  | 51.5      | 2.9 (49.7,52.6)                   | 5.6              | 6.668E-03                               | 2.299E-03                  | 0.3                  |
| 9    | P3  | 53.8      | 2.5 (52.0,54.5)                   | 4.6              | 6.974E-03                               | 2.790E-03                  | 0.4                  |
| 10   | P3  | 55.7      | 3.2 (53.8,57.0)                   | 5.7              | 6.812E-03                               | 2.129E-03                  | 0.5                  |
| 11   | P3  | 58.3      | 2.6 (56.4,59.0)                   | 4.5              | 6.856E-03                               | 2.637E-03                  | 0.4                  |
| 12   | P3  | 60.3      | 3.4 (58.3,61.7)                   | 5.6              | 6.711E-03                               | 1.974E-03                  | 0.3                  |
| 13   | P3  | 62.4      | 3.6 (60.3,63.9)                   | 5.8              | 6.664E-03                               | 1.851E-03                  | 0.5                  |
| 14   | P4  | 74.0      | 2.5 (72.4,74.9)                   | 3.4              | 5.791E-03                               | 2.316E-03                  | 0.3                  |
| 15   | P4  | 76.6      | 3.5 (74.0,77.5)                   | 4.6              | 6.050E-03                               | 1.729E-03                  | 0.4                  |
| 16   | P4  | 78.4      | 2.7 (76.6,79.3)                   | 3.4              | 5.993E-03                               | 2.220E-03                  | 0.5                  |
| 17   | P4  | 81.1      | 3.6 (78.4,82.0)                   | 4.4              | 6.031E-03                               | 1.675E-03                  | 0.4                  |
| 18   | P4  | 83.0      | 2.8 (81.1,83.9)                   | 3.4              | 5.883E-03                               | 2.101E-03                  | 0.4                  |
| 19   | P4  | 85.8      | 3.8 (83.0,86.8)                   | 4.4              | 5.958E-03                               | 1.568E-03                  | 0.6                  |
| 20   | P4  | 87.8      | 3.0 (85.8,88.8)                   | 3.4              | 5.854E-03                               | 1.951E-03                  | 0.3                  |
| 21   | P4  | 89.8      | 3.1 (87.8,90.9)                   | 3.5              | 5.771E-03                               | 1.862E-03                  | 0.2                  |
| 22   | P5  | 103.0     | 3.0 (101.0,104.0)                 | 2.9              | 5.352E-03                               | 1.784E-03                  | 0.2                  |
| 23   | P5  | 105.0     | 4.0 (103.0,107.0)                 | 3.8              | 5.458E-03                               | 1.365E-03                  | 0.3                  |
| 24   | P5  | 108.0     | 4.0 (105.0,109.0)                 | 3.7              | 5.501E-03                               | 1.375E-03                  | 0.6                  |
| 25   | P5  | 109.0     | 3.0 (107.0,110.0)                 | 2.8              | 5.378E-03                               | 1.793E-03                  | 0.7                  |
| 26   | P5  | 112.0     | 4.0 (109.0,113.0)                 | 3.6              | 5.383E-03                               | 1.346E-03                  | 0.3                  |
| 27   | P5  | 114.0     | 3.0 (112.0,115.0)                 | 2.6              | 5.295E-03                               | 1.765E-03                  | 0.2                  |
| 28   | P5  | 116.7     | 2.6 (114.1,116.7)                 | 2.2              | 5.282E-03                               | 2.032E-03                  | 0.7                  |
| 29   | P6  | 137.0     | 4.0 (134.0,138.0)                 | 2.9              | 4.759E-03                               | 1.190E-03                  | 0.2                  |
| 30   | P6  | 140.0     | 3.0 (137.0,140.0)                 | 2.1              | 4.920E-03                               | 1.640E-03                  | 0.9                  |
| 31   | P6  | 142.0     | 5.0 (138.0,143.0)                 | 3.5              | 4.786E-03                               | 9.572E-04                  | 0.2                  |
| 32   | P6  | 143.0     | 3.0 (142.0,145.0)                 | 2.1              | 4.772E-03                               | 1.591E-03                  | 0.5                  |
| 33   | P6  | 146.5     | 3.3 (143.2,146.5)                 | 2.3              | 4.773E-03                               | 1.446E-03                  | 0.6                  |
| 34   | P6  | 148.0     | 5.0 (145.0,150.0)                 | 3.4              | 4.693E-03                               | 9.386E-04                  | 0.2                  |
| 35   | P6  | 150.0     | 4.0 (148.0,152.0)                 | 2.7              | 4.554E-03                               | 1.138E-03                  | 0.5                  |
| 36   | P6  | 153.0     | 3.0 (150.0,153.0)                 | 2.0              | 4.646E-03                               | 1.549E-03                  | 0.7                  |
| 37   | P6  | 155.0     | 5.0 (152.0,157.0)                 | 3.2              | 4.575E-03                               | 9.150E-04                  | 0.3                  |
| 38   | P7  | 175.8     | 4.0 (171.8,175.8)                 | 2.3              | 4.090E-03                               | 1.022E-03                  | 1.1                  |
| 39   | P7  | 178.0     | 4.0 (174.0,178.0)                 | 2.2              | 4.103E-03                               | 1.026E-03                  | 0.9                  |
| 40   | P7  | 180.0     | 6.0 (176.0,182.0)                 | 3.3              | 4.132E-03                               | 6.887E-04                  | 0.7                  |
| 41   | P7  | 182.0     | 6.0 (178.0,184.0)                 | 3.3              | 4.076E-03                               | 6.793E-04                  | 0.6                  |
| 42   | P7  | 184.0     | 6.0 (180.0,186.0)                 | 3.3              | 4.055E-03                               | 6.758E-04                  | 0.4                  |
| 43   | P7  | 186.0     | 6.0 (182.0,188.0)                 | 3.2              | 3.991E-03                               | 6.652E-04                  | 0.4                  |
| 44   | P7  | 188.0     | 6.0 (184.0,190.0)                 | 3.2              | 3.976E-03                               | 6.627E-04                  | 0.2                  |
| 45   | P7  | 190.0     | 7.0 (186.0,193.0)                 | 3.7              | 3.959E-03                               | 5.656E-04                  | 0.2                  |
| 46   | P7  | 193.0     | 7.0 (188.0,195.0)                 | 3.6              | 3.880E-03                               | 5.543E-04                  | 0.2                  |
| 47   | P7  | 195.0     | 7.0 (190.0,197.0)                 | 3.6              | 3.998E-03                               | 5.711E-04                  | 0.3                  |
| 48   | P8  | 216.0     | 5.2 (213.0,218.2)                 | 2.4              | 3.502E-03                               | 6.735E-04                  | 0.7                  |
| 49   | P8  | 218.3     | 5.4 (215.1,220.5)                 | 2.5              | 3.479E-03                               | 6.443E-04                  | 0.4                  |
| 50   | P8  | 220.5     | 5.5 (217.3,222.8)                 | 2.5              | 3.599E-03                               | 6.544E-04                  | 0.2                  |
| 51   | P8  | 222.8     | 5.7 (219.4,225.1)                 | 2.6              | 3.662E-03                               | 6.425E-04                  | 0.4                  |

|    |    |       |                   |     |           |           |     |
|----|----|-------|-------------------|-----|-----------|-----------|-----|
| 52 | P8 | 225.1 | 5.8 (221.6,227.4) | 2.6 | 3.665E-03 | 6.319E-04 | 0.7 |
| 53 | P8 | 227.4 | 5.9 (223.8,229.7) | 2.6 | 3.650E-03 | 6.186E-04 | 1.2 |
| 54 | P8 | 229.6 | 6.1 (225.9,232.0) | 2.7 | 3.570E-03 | 5.852E-04 | 1.4 |
| 55 | P8 | 231.9 | 6.2 (228.1,234.3) | 2.7 | 3.579E-03 | 5.773E-04 | 1.0 |
| 56 | P8 | 234.2 | 6.4 (230.2,236.6) | 2.7 | 3.568E-03 | 5.575E-04 | 0.9 |
| 57 | P8 | 236.5 | 6.5 (232.4,238.9) | 2.7 | 3.472E-03 | 5.342E-04 | 0.4 |
| 58 | P8 | 238.7 | 6.7 (234.5,241.2) | 2.8 | 3.422E-03 | 5.107E-04 | 0.4 |
| 59 | P8 | 241.0 | 6.8 (236.7,243.5) | 2.8 | 3.540E-03 | 5.206E-04 | 1.1 |

Probe A (M35)

Table 3: Energy/Flux Calibration Factors for the Histogram Electron Channels. Histogram LUT ID (M35-A): 20737.

| CH # | PIX | $E$ [keV] | $\Delta E (E_{lo}, E_{hi})$ [keV] | $\Delta E/E$ [%] | $G_0 \Delta E$ [cm <sup>2</sup> sr keV] | $G_0$ [cm <sup>2</sup> sr] | $\Delta G_0/G_0$ [%] |
|------|-----|-----------|-----------------------------------|------------------|-----------------------------------------|----------------------------|----------------------|
| 0    | P1  | 131       | 5 (126,131)                       | 3.8              | 1.880E-02                               | 3.760E-03                  | 1.5                  |
| 1    | P1  | 136       | 6 (130,136)                       | 4.4              | 1.940E-02                               | 3.233E-03                  | 1.4                  |
| 2    | P1  | 141       | 6 (134,141)                       | 4.5              | 1.960E-02                               | 3.111E-03                  | 1.3                  |
| 3    | P1  | 146       | 7 (139,146)                       | 4.8              | 1.960E-02                               | 2.800E-03                  | 1.2                  |
| 4    | P1  | 151       | 7 (144,151)                       | 4.4              | 1.960E-02                               | 2.925E-03                  | 1.2                  |
| 5    | P1  | 156       | 7 (149,156)                       | 4.5              | 1.950E-02                               | 2.786E-03                  | 1.2                  |
| 6    | P1  | 160       | 6 (154,160)                       | 3.8              | 1.940E-02                               | 3.233E-03                  | 1.2                  |
| 7    | P1  | 165       | 7 (158,165)                       | 4.2              | 1.920E-02                               | 2.743E-03                  | 1.1                  |
| 8    | P1  | 169       | 6 (163,169)                       | 3.6              | 1.890E-02                               | 3.150E-03                  | 1.2                  |
| 9    | P1  | 175       | 8 (167,175)                       | 4.6              | 1.820E-02                               | 2.275E-03                  | 1.1                  |
| 10   | P2  | 210       | 8 (202,210)                       | 3.7              | 1.641E-02                               | 2.131E-03                  | 0.9                  |
| 11   | P2  | 214       | 7 (207,214)                       | 3.3              | 1.735E-02                               | 2.444E-03                  | 0.9                  |
| 12   | P2  | 219       | 7 (212,219)                       | 3.4              | 1.793E-02                               | 2.423E-03                  | 0.9                  |
| 13   | P2  | 224       | 8 (216,224)                       | 3.5              | 1.798E-02                               | 2.305E-03                  | 1.0                  |
| 14   | P2  | 227       | 6 (221,227)                       | 2.7              | 1.790E-02                               | 2.934E-03                  | 1.0                  |
| 15   | P2  | 232       | 7 (226,232)                       | 2.9              | 1.794E-02                               | 2.678E-03                  | 0.9                  |
| 16   | P2  | 238       | 8 (230,238)                       | 3.3              | 1.774E-02                               | 2.274E-03                  | 0.8                  |
| 17   | P2  | 243       | 8 (235,243)                       | 3.4              | 1.792E-02                               | 2.185E-03                  | 0.8                  |
| 18   | P2  | 249       | 10 (240,249)                      | 3.8              | 1.768E-02                               | 1.861E-03                  | 1.0                  |
| 19   | P2  | 251       | 7 (244,251)                       | 2.7              | 1.756E-02                               | 2.545E-03                  | 0.8                  |
| 20   | P2  | 257       | 8 (249,257)                       | 3.2              | 1.751E-02                               | 2.135E-03                  | 0.7                  |
| 21   | P2  | 260       | 7 (253,260)                       | 2.5              | 1.705E-02                               | 2.583E-03                  | 1.0                  |
| 22   | P2  | 266       | 8 (258,266)                       | 3.0              | 1.646E-02                               | 2.084E-03                  | 0.7                  |
| 23   | P3  | 309       | 9 (300,309)                       | 3.0              | 1.393E-02                               | 1.514E-03                  | 0.8                  |
| 24   | P3  | 312       | 8 (304,312)                       | 2.5              | 1.451E-02                               | 1.837E-03                  | 0.6                  |
| 25   | P3  | 316       | 8 (308,316)                       | 2.4              | 1.496E-02                               | 1.995E-03                  | 0.6                  |
| 26   | P3  | 319       | 6 (313,319)                       | 1.9              | 1.508E-02                               | 2.432E-03                  | 0.7                  |
| 27   | P3  | 327       | 10 (317,327)                      | 3.0              | 1.527E-02                               | 1.542E-03                  | 0.7                  |
| 28   | P3  | 330       | 9 (321,330)                       | 2.7              | 1.535E-02                               | 1.706E-03                  | 0.5                  |
| 29   | P3  | 334       | 8 (326,334)                       | 2.5              | 1.511E-02                               | 1.820E-03                  | 0.5                  |
| 30   | P3  | 338       | 8 (330,338)                       | 2.4              | 1.513E-02                               | 1.891E-03                  | 0.6                  |
| 31   | P3  | 342       | 8 (334,342)                       | 2.2              | 1.510E-02                               | 1.987E-03                  | 0.8                  |
| 32   | P3  | 350       | 11 (339,350)                      | 3.2              | 1.500E-02                               | 1.327E-03                  | 0.7                  |
| 33   | P3  | 354       | 11 (343,354)                      | 3.1              | 1.495E-02                               | 1.359E-03                  | 0.6                  |
| 34   | P3  | 358       | 11 (347,358)                      | 3.0              | 1.484E-02                               | 1.387E-03                  | 0.5                  |
| 35   | P3  | 362       | 10 (352,362)                      | 2.9              | 1.485E-02                               | 1.428E-03                  | 0.5                  |
| 36   | P3  | 366       | 10 (356,366)                      | 2.7              | 1.473E-02                               | 1.473E-03                  | 0.5                  |
| 37   | P3  | 370       | 10 (360,370)                      | 2.6              | 1.469E-02                               | 1.514E-03                  | 0.5                  |
| 38   | P4  | 429       | 14 (415,429)                      | 3.3              | 2.527E-02                               | 1.805E-03                  | 0.8                  |
| 39   | P4  | 434       | 10 (424,434)                      | 2.3              | 2.558E-02                               | 2.558E-03                  | 0.6                  |
| 40   | P4  | 444       | 15 (429,444)                      | 3.4              | 2.600E-02                               | 1.733E-03                  | 0.4                  |
| 41   | P4  | 454       | 15 (439,454)                      | 3.3              | 2.580E-02                               | 1.720E-03                  | 0.5                  |
| 42   | P4  | 465       | 16 (449,465)                      | 3.4              | 2.553E-02                               | 1.596E-03                  | 0.8                  |
| 43   | P4  | 470       | 10 (460,470)                      | 2.1              | 2.511E-02                               | 2.511E-03                  | 0.5                  |
| 44   | P4  | 481       | 16 (465,481)                      | 3.3              | 2.526E-02                               | 1.579E-03                  | 0.5                  |
| 45   | P4  | 486       | 17 (475,492)                      | 3.5              | 2.438E-02                               | 1.434E-03                  | 0.8                  |
| 46   | P5  | 551       | 18 (533,551)                      | 3.3              | 2.084E-02                               | 1.158E-03                  | 0.8                  |
| 47   | P5  | 558       | 13 (545,558)                      | 2.3              | 2.211E-02                               | 1.701E-03                  | 0.5                  |
| 48   | P5  | 564       | 13 (551,564)                      | 2.3              | 2.180E-02                               | 1.677E-03                  | 0.5                  |
| 49   | P5  | 577       | 19 (558,577)                      | 3.3              | 2.240E-02                               | 1.179E-03                  | 0.9                  |
| 50   | P5  | 584       | 14 (570,584)                      | 2.4              | 2.220E-02                               | 1.586E-03                  | 0.5                  |
| 51   | P5  | 590       | 13 (577,590)                      | 2.2              | 2.173E-02                               | 1.672E-03                  | 0.5                  |
| 52   | P5  | 597       | 20 (584,604)                      | 3.4              | 2.119E-02                               | 1.060E-03                  | 0.8                  |
| 53   | P5  | 611       | 14 (597,611)                      | 2.3              | 2.141E-02                               | 1.529E-03                  | 0.6                  |
| 54   | P5  | 618       | 14 (604,618)                      | 2.3              | 2.101E-02                               | 1.501E-03                  | 0.3                  |
| 55   | P5  | 625       | 14 (611,625)                      | 2.2              | 2.041E-02                               | 1.458E-03                  | 0.5                  |
| 56   | P6  | 684       | 15 (669,684)                      | 2.2              | 1.855E-02                               | 1.237E-03                  | 0.3                  |
| 57   | P6  | 692       | 15 (677,692)                      | 2.2              | 1.964E-02                               | 1.309E-03                  | 0.4                  |
| 58   | P6  | 700       | 24 (684,708)                      | 3.4              | 1.960E-02                               | 8.167E-04                  | 0.6                  |
| 59   | P6  | 708       | 24 (692,716)                      | 3.4              | 1.999E-02                               | 8.329E-04                  | 0.8                  |
| 60   | P6  | 724       | 16 (708,724)                      | 2.2              | 2.038E-02                               | 1.274E-03                  | 0.9                  |
| 61   | P6  | 733       | 17 (716,733)                      | 2.3              | 1.987E-02                               | 1.169E-03                  | 0.7                  |

|    |    |      |                |     |           |           |     |
|----|----|------|----------------|-----|-----------|-----------|-----|
| 62 | P6 | 741  | 17 (724,741)   | 2.3 | 1.985E-02 | 1.168E-03 | 0.4 |
| 63 | P6 | 749  | 16 (733,749)   | 2.1 | 1.931E-02 | 1.207E-03 | 0.2 |
| 64 | P6 | 758  | 17 (741,758)   | 2.2 | 1.911E-02 | 1.124E-03 | 0.2 |
| 65 | P6 | 767  | 26 (749,775)   | 3.4 | 1.884E-02 | 7.246E-04 | 0.2 |
| 66 | P7 | 837  | 22 (820,842)   | 2.6 | 1.504E-02 | 6.931E-04 | 0.7 |
| 67 | P7 | 846  | 22 (829,851)   | 2.6 | 1.612E-02 | 7.361E-04 | 0.8 |
| 68 | P7 | 855  | 22 (837,859)   | 2.6 | 1.650E-02 | 7.500E-04 | 1.0 |
| 69 | P7 | 864  | 22 (846,868)   | 2.6 | 1.630E-02 | 7.342E-04 | 1.1 |
| 70 | P7 | 873  | 22 (854,877)   | 2.6 | 1.625E-02 | 7.222E-04 | 0.8 |
| 71 | P7 | 882  | 23 (863,886)   | 2.6 | 1.646E-02 | 7.283E-04 | 0.8 |
| 72 | P7 | 891  | 23 (872,894)   | 2.6 | 1.628E-02 | 7.140E-04 | 0.4 |
| 73 | P7 | 900  | 23 (880,903)   | 2.6 | 1.592E-02 | 6.892E-04 | 0.4 |
| 74 | P7 | 909  | 23 (889,912)   | 2.6 | 1.589E-02 | 6.849E-04 | 0.6 |
| 75 | P7 | 918  | 23 (897,921)   | 2.5 | 1.558E-02 | 6.658E-04 | 0.8 |
| 76 | P7 | 927  | 24 (906,930)   | 2.5 | 1.512E-02 | 6.407E-04 | 0.9 |
| 77 | P8 | 1002 | 25 (983,1008)  | 2.5 | 1.325E-02 | 5.364E-04 | 0.8 |
| 78 | P8 | 1012 | 25 (992,1017)  | 2.5 | 1.400E-02 | 5.600E-04 | 1.1 |
| 79 | P8 | 1021 | 25 (1001,1027) | 2.5 | 1.392E-02 | 5.480E-04 | 0.6 |
| 80 | P8 | 1031 | 26 (1010,1036) | 2.5 | 1.444E-02 | 5.619E-04 | 0.4 |
| 81 | P8 | 1040 | 26 (1019,1045) | 2.5 | 1.451E-02 | 5.581E-04 | 0.9 |
| 82 | P8 | 1050 | 26 (1028,1054) | 2.5 | 1.440E-02 | 5.496E-04 | 1.1 |
| 83 | P8 | 1059 | 26 (1037,1064) | 2.5 | 1.376E-02 | 5.192E-04 | 0.9 |
| 84 | P8 | 1069 | 27 (1046,1073) | 2.5 | 1.380E-02 | 5.149E-04 | 0.4 |
| 85 | P8 | 1078 | 27 (1055,1082) | 2.5 | 1.389E-02 | 5.107E-04 | 0.9 |
| 86 | P8 | 1088 | 28 (1064,1092) | 2.5 | 1.370E-02 | 4.982E-04 | 1.2 |

Table 4: Energy/Flux Calibration Factors for the Histogram Electron Channels. Histogram LUT ID (M35-A): 20738.

| CH # | PIX | $E$ [keV] | $\Delta E (E_{lo}, E_{hi})$ [keV] | $\Delta E/E$ [%] | $G_0 \Delta E$ [cm <sup>2</sup> sr keV] | $G_0$ [cm <sup>2</sup> sr] | $\Delta G_0/G_0$ [%] |
|------|-----|-----------|-----------------------------------|------------------|-----------------------------------------|----------------------------|----------------------|
| 0    | P1  | 135       | 10 (126,136)                      | 7.4              | 3.860E-02                               | 3.860E-03                  | 1.3                  |
| 1    | P1  | 144       | 11 (135,146)                      | 7.6              | 3.940E-02                               | 3.582E-03                  | 1.3                  |
| 2    | P1  | 152       | 12 (144,156)                      | 7.9              | 3.880E-02                               | 3.233E-03                  | 1.3                  |
| 3    | P1  | 163       | 11 (154,165)                      | 6.7              | 3.880E-02                               | 3.527E-03                  | 1.3                  |
| 4    | P1  | 173       | 12 (163,175)                      | 6.9              | 3.730E-02                               | 3.108E-03                  | 1.3                  |
| 5    | P2  | 212       | 12 (200,212)                      | 5.5              | 3.374E-02                               | 2.884E-03                  | 0.9                  |
| 6    | P2  | 222       | 12 (210,222)                      | 5.5              | 3.591E-02                               | 2.920E-03                  | 1.0                  |
| 7    | P2  | 230       | 13 (219,232)                      | 5.7              | 3.581E-02                               | 2.755E-03                  | 0.9                  |
| 8    | P2  | 240       | 13 (230,243)                      | 5.4              | 3.564E-02                               | 2.742E-03                  | 0.8                  |
| 9    | P2  | 249       | 11 (240,251)                      | 4.4              | 3.501E-02                               | 3.183E-03                  | 0.9                  |
| 10   | P2  | 260       | 11 (249,260)                      | 4.2              | 3.483E-02                               | 3.166E-03                  | 0.8                  |
| 11   | P3  | 309       | 10 (298,309)                      | 3.3              | 2.822E-02                               | 2.740E-03                  | 0.7                  |
| 12   | P3  | 319       | 14 (305,319)                      | 4.4              | 3.027E-02                               | 2.162E-03                  | 0.7                  |
| 13   | P3  | 327       | 11 (316,327)                      | 3.4              | 3.038E-02                               | 2.762E-03                  | 0.6                  |
| 14   | P3  | 338       | 15 (323,338)                      | 4.4              | 3.044E-02                               | 2.029E-03                  | 0.7                  |
| 15   | P3  | 346       | 12 (334,346)                      | 3.5              | 3.017E-02                               | 2.514E-03                  | 0.5                  |
| 16   | P3  | 354       | 16 (342,358)                      | 4.5              | 2.951E-02                               | 1.844E-03                  | 0.7                  |
| 17   | P3  | 362       | 16 (350,366)                      | 4.4              | 2.930E-02                               | 1.831E-03                  | 0.8                  |
| 18   | P3  | 374       | 12 (362,374)                      | 3.2              | 2.870E-02                               | 2.392E-03                  | 0.7                  |
| 19   | P4  | 429       | 14 (415,429)                      | 3.3              | 2.527E-02                               | 1.805E-03                  | 0.8                  |
| 20   | P4  | 434       | 10 (424,434)                      | 2.3              | 2.558E-02                               | 2.558E-03                  | 0.6                  |
| 21   | P4  | 444       | 15 (429,444)                      | 3.4              | 2.600E-02                               | 1.733E-03                  | 0.4                  |
| 22   | P4  | 454       | 15 (439,454)                      | 3.3              | 2.580E-02                               | 1.720E-03                  | 0.5                  |
| 23   | P4  | 465       | 16 (449,465)                      | 3.4              | 2.553E-02                               | 1.596E-03                  | 0.8                  |
| 24   | P4  | 470       | 10 (460,470)                      | 2.1              | 2.511E-02                               | 2.511E-03                  | 0.5                  |
| 25   | P4  | 481       | 16 (465,481)                      | 3.3              | 2.526E-02                               | 1.579E-03                  | 0.5                  |
| 26   | P4  | 486       | 17 (475,492)                      | 3.5              | 2.438E-02                               | 1.434E-03                  | 0.8                  |
| 27   | P5  | 551       | 18 (533,551)                      | 3.3              | 2.084E-02                               | 1.158E-03                  | 0.8                  |
| 28   | P5  | 558       | 13 (545,558)                      | 2.3              | 2.211E-02                               | 1.701E-03                  | 0.5                  |
| 29   | P5  | 564       | 13 (551,564)                      | 2.3              | 2.180E-02                               | 1.677E-03                  | 0.5                  |
| 30   | P5  | 577       | 19 (558,577)                      | 3.3              | 2.240E-02                               | 1.179E-03                  | 0.9                  |
| 31   | P5  | 584       | 14 (570,584)                      | 2.4              | 2.220E-02                               | 1.586E-03                  | 0.5                  |
| 32   | P5  | 590       | 13 (577,590)                      | 2.2              | 2.173E-02                               | 1.672E-03                  | 0.5                  |
| 33   | P5  | 597       | 20 (584,604)                      | 3.4              | 2.119E-02                               | 1.060E-03                  | 0.8                  |
| 34   | P5  | 611       | 14 (597,611)                      | 2.3              | 2.141E-02                               | 1.529E-03                  | 0.6                  |



|    |    |      |                |     |           |           |     |
|----|----|------|----------------|-----|-----------|-----------|-----|
| 35 | P5 | 618  | 14 (604,618)   | 2.3 | 2.101E-02 | 1.501E-03 | 0.3 |
| 36 | P5 | 625  | 14 (611,625)   | 2.2 | 2.041E-02 | 1.458E-03 | 0.5 |
| 37 | P6 | 684  | 15 (669,684)   | 2.2 | 1.855E-02 | 1.237E-03 | 0.3 |
| 38 | P6 | 692  | 15 (677,692)   | 2.2 | 1.964E-02 | 1.309E-03 | 0.4 |
| 39 | P6 | 700  | 24 (684,708)   | 3.4 | 1.960E-02 | 8.167E-04 | 0.6 |
| 40 | P6 | 708  | 24 (692,716)   | 3.4 | 1.999E-02 | 8.329E-04 | 0.8 |
| 41 | P6 | 724  | 16 (708,724)   | 2.2 | 2.038E-02 | 1.274E-03 | 0.9 |
| 42 | P6 | 733  | 17 (716,733)   | 2.3 | 1.987E-02 | 1.169E-03 | 0.7 |
| 43 | P6 | 741  | 17 (724,741)   | 2.3 | 1.985E-02 | 1.168E-03 | 0.4 |
| 44 | P6 | 749  | 16 (733,749)   | 2.1 | 1.931E-02 | 1.207E-03 | 0.2 |
| 45 | P6 | 758  | 17 (741,758)   | 2.2 | 1.911E-02 | 1.124E-03 | 0.2 |
| 46 | P6 | 767  | 26 (749,775)   | 3.4 | 1.884E-02 | 7.246E-04 | 0.2 |
| 47 | P7 | 837  | 22 (820,842)   | 2.6 | 1.504E-02 | 6.931E-04 | 0.7 |
| 48 | P7 | 846  | 22 (829,851)   | 2.6 | 1.612E-02 | 7.361E-04 | 0.8 |
| 49 | P7 | 855  | 22 (837,859)   | 2.6 | 1.650E-02 | 7.500E-04 | 1.0 |
| 50 | P7 | 864  | 22 (846,868)   | 2.6 | 1.630E-02 | 7.342E-04 | 1.1 |
| 51 | P7 | 873  | 22 (854,877)   | 2.6 | 1.625E-02 | 7.222E-04 | 0.8 |
| 52 | P7 | 882  | 23 (863,886)   | 2.6 | 1.646E-02 | 7.283E-04 | 0.8 |
| 53 | P7 | 891  | 23 (872,894)   | 2.6 | 1.628E-02 | 7.140E-04 | 0.4 |
| 54 | P7 | 900  | 23 (880,903)   | 2.6 | 1.592E-02 | 6.892E-04 | 0.4 |
| 55 | P7 | 909  | 23 (889,912)   | 2.6 | 1.589E-02 | 6.849E-04 | 0.6 |
| 56 | P7 | 918  | 23 (897,921)   | 2.5 | 1.558E-02 | 6.658E-04 | 0.8 |
| 57 | P7 | 927  | 24 (906,930)   | 2.5 | 1.512E-02 | 6.407E-04 | 0.9 |
| 58 | P8 | 1002 | 25 (983,1008)  | 2.5 | 1.325E-02 | 5.364E-04 | 0.8 |
| 59 | P8 | 1012 | 25 (992,1017)  | 2.5 | 1.400E-02 | 5.600E-04 | 1.1 |
| 60 | P8 | 1021 | 25 (1001,1027) | 2.5 | 1.392E-02 | 5.480E-04 | 0.6 |
| 61 | P8 | 1031 | 26 (1010,1036) | 2.5 | 1.444E-02 | 5.619E-04 | 0.4 |
| 62 | P8 | 1040 | 26 (1019,1045) | 2.5 | 1.451E-02 | 5.581E-04 | 0.9 |
| 63 | P8 | 1050 | 26 (1028,1054) | 2.5 | 1.440E-02 | 5.496E-04 | 1.1 |
| 64 | P8 | 1059 | 26 (1037,1064) | 2.5 | 1.376E-02 | 5.192E-04 | 0.9 |
| 65 | P8 | 1069 | 27 (1046,1073) | 2.5 | 1.380E-02 | 5.149E-04 | 0.4 |
| 66 | P8 | 1078 | 27 (1055,1082) | 2.5 | 1.389E-02 | 5.107E-04 | 0.9 |
| 67 | P8 | 1088 | 28 (1064,1092) | 2.5 | 1.370E-02 | 4.982E-04 | 1.2 |

Probe A (M75)

Table 5: Energy/Flux Calibration Factors for the Histogram Electron Channels. Histogram LUT ID (M75-A): 24833.

| CH # | PIX | $E$ [keV] | $\Delta E (E_{lo}, E_{hi})$ [keV] | $\Delta E/E$ [%] | $G_0 \Delta E$ [cm <sup>2</sup> sr keV] | $G_0$ [cm <sup>2</sup> sr] | $\Delta G_0/G_0$ [%] |
|------|-----|-----------|-----------------------------------|------------------|-----------------------------------------|----------------------------|----------------------|
| 0    | P1  | 131       | 6 (125,131)                       | 4.6              | 1.730E-02                               | 2.883E-03                  | 1.6                  |
| 1    | P1  | 136       | 6 (130,136)                       | 4.4              | 1.860E-02                               | 3.100E-03                  | 1.6                  |
| 2    | P1  | 139       | 6 (133,139)                       | 4.3              | 1.870E-02                               | 3.117E-03                  | 1.5                  |
| 3    | P1  | 144       | 6 (138,144)                       | 4.2              | 1.890E-02                               | 3.150E-03                  | 1.3                  |
| 4    | P1  | 149       | 7 (142,149)                       | 4.7              | 1.880E-02                               | 2.686E-03                  | 1.3                  |
| 5    | P1  | 154       | 6 (148,154)                       | 3.9              | 1.890E-02                               | 3.150E-03                  | 1.4                  |
| 6    | P1  | 158       | 7 (151,158)                       | 4.4              | 1.860E-02                               | 2.657E-03                  | 1.3                  |
| 7    | P1  | 163       | 5 (158,163)                       | 3.1              | 1.870E-02                               | 3.740E-03                  | 1.3                  |
| 8    | P1  | 167       | 7 (160,167)                       | 4.2              | 1.850E-02                               | 2.643E-03                  | 1.1                  |
| 9    | P1  | 171       | 6 (165,171)                       | 3.3              | 1.810E-02                               | 3.175E-03                  | 1.3                  |
| 10   | P1  | 177       | 6 (171,177)                       | 3.4              | 1.780E-02                               | 2.967E-03                  | 1.2                  |
| 11   | P2  | 214       | 8 (206,214)                       | 3.5              | 1.630E-02                               | 2.173E-03                  | 1.0                  |
| 12   | P2  | 219       | 8 (211,219)                       | 3.7              | 1.690E-02                               | 2.112E-03                  | 1.1                  |
| 13   | P2  | 222       | 6 (216,222)                       | 2.8              | 1.738E-02                               | 2.759E-03                  | 1.0                  |
| 14   | P2  | 227       | 7 (220,227)                       | 3.0              | 1.747E-02                               | 2.569E-03                  | 0.9                  |
| 15   | P2  | 232       | 7 (225,232)                       | 3.1              | 1.752E-02                               | 2.400E-03                  | 0.9                  |
| 16   | P2  | 238       | 9 (229,238)                       | 3.7              | 1.736E-02                               | 1.995E-03                  | 0.9                  |
| 17   | P2  | 240       | 6 (234,240)                       | 2.6              | 1.720E-02                               | 2.774E-03                  | 1.1                  |
| 18   | P2  | 246       | 7 (238,246)                       | 3.0              | 1.726E-02                               | 2.332E-03                  | 0.8                  |
| 19   | P2  | 251       | 8 (243,251)                       | 3.2              | 1.731E-02                               | 2.164E-03                  | 0.8                  |
| 20   | P2  | 254       | 6 (248,254)                       | 2.6              | 1.697E-02                               | 2.611E-03                  | 0.9                  |
| 21   | P2  | 260       | 8 (252,260)                       | 3.0              | 1.685E-02                               | 2.133E-03                  | 0.7                  |
| 22   | P2  | 266       | 9 (257,266)                       | 3.5              | 1.700E-02                               | 1.828E-03                  | 1.0                  |
| 23   | P2  | 269       | 8 (261,269)                       | 2.9              | 1.649E-02                               | 2.114E-03                  | 0.7                  |
| 24   | P3  | 319       | 8 (311,319)                       | 2.4              | 1.413E-02                               | 1.835E-03                  | 0.9                  |
| 25   | P3  | 323       | 8 (315,323)                       | 2.4              | 1.448E-02                               | 1.881E-03                  | 0.8                  |
| 26   | P3  | 327       | 8 (319,327)                       | 2.4              | 1.452E-02                               | 1.886E-03                  | 0.6                  |
| 27   | P3  | 330       | 7 (323,330)                       | 2.2              | 1.488E-02                               | 2.067E-03                  | 0.5                  |
| 28   | P3  | 334       | 7 (327,334)                       | 2.0              | 1.469E-02                               | 2.160E-03                  | 0.6                  |
| 29   | P3  | 338       | 7 (331,338)                       | 2.0              | 1.458E-02                               | 2.144E-03                  | 0.8                  |
| 30   | P3  | 346       | 11 (335,346)                      | 3.2              | 1.479E-02                               | 1.357E-03                  | 0.9                  |
| 31   | P3  | 350       | 11 (339,350)                      | 3.1              | 1.465E-02                               | 1.344E-03                  | 0.7                  |
| 32   | P3  | 354       | 11 (343,354)                      | 3.1              | 1.453E-02                               | 1.333E-03                  | 0.6                  |
| 33   | P3  | 358       | 11 (347,358)                      | 3.1              | 1.440E-02                               | 1.309E-03                  | 0.5                  |
| 34   | P3  | 362       | 11 (351,362)                      | 3.0              | 1.431E-02                               | 1.301E-03                  | 0.5                  |
| 35   | P3  | 366       | 11 (355,366)                      | 3.0              | 1.397E-02                               | 1.270E-03                  | 0.5                  |
| 36   | P3  | 370       | 11 (359,370)                      | 3.0              | 1.424E-02                               | 1.295E-03                  | 0.5                  |
| 37   | P3  | 374       | 11 (363,374)                      | 3.0              | 1.425E-02                               | 1.284E-03                  | 0.5                  |
| 38   | P3  | 379       | 12 (367,379)                      | 3.2              | 1.383E-02                               | 1.143E-03                  | 0.5                  |
| 39   | P4  | 439       | 15 (424,439)                      | 3.4              | 2.487E-02                               | 1.658E-03                  | 0.5                  |
| 40   | P4  | 449       | 15 (434,449)                      | 3.3              | 2.575E-02                               | 1.717E-03                  | 0.7                  |
| 41   | P4  | 454       | 10 (444,454)                      | 2.2              | 2.577E-02                               | 2.577E-03                  | 0.6                  |
| 42   | P4  | 465       | 16 (449,465)                      | 3.4              | 2.556E-02                               | 1.597E-03                  | 0.4                  |
| 43   | P4  | 475       | 15 (460,475)                      | 3.2              | 2.560E-02                               | 1.707E-03                  | 0.6                  |
| 44   | P4  | 481       | 11 (470,481)                      | 2.3              | 2.509E-02                               | 2.281E-03                  | 0.6                  |
| 45   | P4  | 492       | 17 (475,492)                      | 3.5              | 2.482E-02                               | 1.460E-03                  | 0.5                  |
| 46   | P4  | 498       | 17 (486,503)                      | 3.4              | 2.403E-02                               | 1.414E-03                  | 0.9                  |
| 47   | P4  | 509       | 11 (498,509)                      | 2.2              | 2.382E-02                               | 2.165E-03                  | 0.4                  |
| 48   | P5  | 564       | 13 (551,564)                      | 2.3              | 2.166E-02                               | 1.666E-03                  | 0.8                  |
| 49   | P5  | 577       | 19 (558,577)                      | 3.3              | 2.294E-02                               | 1.207E-03                  | 0.6                  |
| 50   | P5  | 584       | 14 (570,584)                      | 2.4              | 2.275E-02                               | 1.625E-03                  | 0.4                  |
| 51   | P5  | 590       | 20 (577,597)                      | 3.4              | 2.273E-02                               | 1.136E-03                  | 0.9                  |
| 52   | P5  | 604       | 14 (590,604)                      | 2.3              | 2.255E-02                               | 1.611E-03                  | 0.6                  |
| 53   | P5  | 611       | 14 (597,611)                      | 2.3              | 2.231E-02                               | 1.594E-03                  | 0.5                  |
| 54   | P5  | 618       | 21 (604,625)                      | 3.4              | 2.191E-02                               | 1.043E-03                  | 0.7                  |
| 55   | P5  | 632       | 21 (611,632)                      | 3.3              | 2.202E-02                               | 1.049E-03                  | 0.8                  |
| 56   | P5  | 639       | 14 (625,639)                      | 2.2              | 2.124E-02                               | 1.517E-03                  | 0.4                  |
| 57   | P6  | 708       | 16 (692,708)                      | 2.3              | 1.895E-02                               | 1.184E-03                  | 0.4                  |
| 58   | P6  | 716       | 24 (700,724)                      | 3.4              | 1.949E-02                               | 8.121E-04                  | 0.6                  |
| 59   | P6  | 724       | 25 (708,733)                      | 3.5              | 1.973E-02                               | 7.892E-04                  | 0.8                  |
| 60   | P6  | 733       | 25 (716,741)                      | 3.4              | 1.981E-02                               | 7.924E-04                  | 0.9                  |
| 61   | P6  | 749       | 16 (733,749)                      | 2.1              | 1.997E-02                               | 1.248E-03                  | 0.9                  |

|    |    |      |                |     |           |           |     |
|----|----|------|----------------|-----|-----------|-----------|-----|
| 62 | P6 | 758  | 17 (741,758)   | 2.2 | 1.976E-02 | 1.162E-03 | 0.7 |
| 63 | P6 | 767  | 18 (749,767)   | 2.3 | 1.937E-02 | 1.076E-03 | 0.5 |
| 64 | P6 | 775  | 17 (758,775)   | 2.2 | 1.923E-02 | 1.131E-03 | 0.3 |
| 65 | P6 | 784  | 17 (767,784)   | 2.2 | 1.891E-02 | 1.112E-03 | 0.3 |
| 66 | P6 | 793  | 18 (775,793)   | 2.3 | 1.801E-02 | 1.001E-03 | 0.3 |
| 67 | P7 | 861  | 22 (842,864)   | 2.6 | 1.457E-02 | 6.623E-04 | 0.8 |
| 68 | P7 | 870  | 22 (851,873)   | 2.6 | 1.541E-02 | 6.941E-04 | 0.6 |
| 69 | P7 | 879  | 23 (859,882)   | 2.6 | 1.591E-02 | 7.040E-04 | 0.4 |
| 70 | P7 | 888  | 23 (868,891)   | 2.6 | 1.563E-02 | 6.855E-04 | 0.5 |
| 71 | P7 | 897  | 23 (877,900)   | 2.6 | 1.583E-02 | 6.883E-04 | 0.6 |
| 72 | P7 | 906  | 23 (886,909)   | 2.6 | 1.581E-02 | 6.785E-04 | 0.9 |
| 73 | P7 | 915  | 24 (894,918)   | 2.6 | 1.560E-02 | 6.638E-04 | 1.1 |
| 74 | P7 | 924  | 24 (903,927)   | 2.6 | 1.548E-02 | 6.532E-04 | 0.8 |
| 75 | P7 | 933  | 24 (912,936)   | 2.6 | 1.518E-02 | 6.299E-04 | 0.5 |
| 76 | P7 | 942  | 24 (921,945)   | 2.6 | 1.480E-02 | 6.091E-04 | 0.5 |
| 77 | P7 | 951  | 24 (930,954)   | 2.6 | 1.494E-02 | 6.098E-04 | 0.8 |
| 78 | P8 | 1021 | 23 (998,1022)  | 2.3 | 1.284E-02 | 5.583E-04 | 0.5 |
| 79 | P8 | 1030 | 24 (1007,1031) | 2.3 | 1.349E-02 | 5.740E-04 | 0.8 |
| 80 | P8 | 1038 | 24 (1016,1040) | 2.3 | 1.347E-02 | 5.660E-04 | 0.9 |
| 81 | P8 | 1047 | 24 (1025,1049) | 2.3 | 1.316E-02 | 5.416E-04 | 1.0 |
| 82 | P8 | 1056 | 25 (1034,1059) | 2.3 | 1.344E-02 | 5.441E-04 | 0.4 |
| 83 | P8 | 1064 | 25 (1043,1068) | 2.4 | 1.332E-02 | 5.307E-04 | 0.9 |
| 84 | P8 | 1073 | 26 (1052,1077) | 2.4 | 1.350E-02 | 5.294E-04 | 1.2 |
| 85 | P8 | 1082 | 26 (1060,1086) | 2.4 | 1.310E-02 | 5.058E-04 | 0.7 |
| 86 | P8 | 1090 | 26 (1069,1096) | 2.4 | 1.304E-02 | 4.958E-04 | 0.6 |
| 87 | P8 | 1099 | 27 (1078,1105) | 2.4 | 1.310E-02 | 4.888E-04 | 1.3 |
| 88 | P8 | 1108 | 27 (1087,1114) | 2.4 | 1.220E-02 | 4.502E-04 | 1.1 |

Table 6: Energy/Flux Calibration Factors for the Histogram Electron Channels. Histogram LUT ID (M75-A): 24834.

| CH # | PIX | $E$ [keV] | $\Delta E (E_{lo}, E_{hi})$ [keV] | $\Delta E/E$ [%] | $G_0 \Delta E$ [cm <sup>2</sup> sr keV] | $G_0$ [cm <sup>2</sup> sr] | $\Delta G_0/G_0$ [%] |
|------|-----|-----------|-----------------------------------|------------------|-----------------------------------------|----------------------------|----------------------|
| 0    | P1  | 133       | 11 (124,135)                      | 8.3              | 3.560E-02                               | 3.236E-03                  | 1.5                  |
| 1    | P1  | 142       | 11 (133,144)                      | 7.7              | 3.780E-02                               | 3.436E-03                  | 1.4                  |
| 2    | P1  | 151       | 10 (142,152)                      | 6.6              | 3.740E-02                               | 3.740E-03                  | 1.3                  |
| 3    | P1  | 160       | 10 (151,161)                      | 6.2              | 3.710E-02                               | 3.710E-03                  | 1.3                  |
| 4    | P1  | 169       | 11 (160,171)                      | 6.5              | 3.660E-02                               | 3.327E-03                  | 1.2                  |
| 5    | P1  | 179       | 12 (169,181)                      | 6.7              | 3.410E-02                               | 2.842E-03                  | 1.2                  |
| 6    | P2  | 217       | 12 (205,217)                      | 5.5              | 3.310E-02                               | 2.758E-03                  | 1.1                  |
| 7    | P2  | 224       | 13 (214,227)                      | 5.8              | 3.488E-02                               | 2.683E-03                  | 0.9                  |
| 8    | P2  | 235       | 11 (224,235)                      | 4.7              | 3.490E-02                               | 3.173E-03                  | 0.9                  |
| 9    | P2  | 243       | 14 (232,246)                      | 5.8              | 3.449E-02                               | 2.464E-03                  | 0.9                  |
| 10   | P2  | 254       | 11 (243,254)                      | 4.3              | 3.450E-02                               | 3.136E-03                  | 1.0                  |
| 11   | P2  | 263       | 12 (251,263)                      | 4.6              | 3.380E-02                               | 2.817E-03                  | 0.8                  |
| 12   | P2  | 272       | 12 (260,272)                      | 4.4              | 3.187E-02                               | 2.656E-03                  | 0.8                  |
| 13   | P3  | 319       | 10 (309,319)                      | 3.1              | 2.842E-02                               | 2.842E-03                  | 0.6                  |
| 14   | P3  | 330       | 15 (316,330)                      | 4.4              | 2.958E-02                               | 2.012E-03                  | 0.9                  |
| 15   | P3  | 338       | 11 (327,338)                      | 3.3              | 2.952E-02                               | 2.612E-03                  | 0.6                  |
| 16   | P3  | 346       | 12 (334,346)                      | 3.5              | 2.924E-02                               | 2.437E-03                  | 0.6                  |
| 17   | P3  | 354       | 12 (342,354)                      | 3.3              | 2.867E-02                               | 2.430E-03                  | 0.7                  |
| 18   | P3  | 362       | 16 (350,366)                      | 4.4              | 2.799E-02                               | 1.749E-03                  | 0.9                  |
| 19   | P3  | 374       | 12 (362,374)                      | 3.2              | 2.866E-02                               | 2.388E-03                  | 0.8                  |
| 20   | P3  | 383       | 13 (370,383)                      | 3.4              | 2.699E-02                               | 2.076E-03                  | 0.8                  |
| 21   | P4  | 439       | 15 (424,439)                      | 3.4              | 2.487E-02                               | 1.658E-03                  | 0.5                  |
| 22   | P4  | 449       | 15 (434,449)                      | 3.3              | 2.575E-02                               | 1.717E-03                  | 0.7                  |
| 23   | P4  | 454       | 10 (444,454)                      | 2.2              | 2.577E-02                               | 2.577E-03                  | 0.6                  |
| 24   | P4  | 465       | 16 (449,465)                      | 3.4              | 2.556E-02                               | 1.597E-03                  | 0.4                  |
| 25   | P4  | 475       | 15 (460,475)                      | 3.2              | 2.560E-02                               | 1.707E-03                  | 0.6                  |
| 26   | P4  | 481       | 11 (470,481)                      | 2.3              | 2.509E-02                               | 2.281E-03                  | 0.6                  |
| 27   | P4  | 492       | 17 (475,492)                      | 3.5              | 2.482E-02                               | 1.460E-03                  | 0.5                  |
| 28   | P4  | 498       | 17 (486,503)                      | 3.4              | 2.403E-02                               | 1.414E-03                  | 0.9                  |
| 29   | P4  | 509       | 11 (498,509)                      | 2.2              | 2.382E-02                               | 2.165E-03                  | 0.4                  |
| 30   | P5  | 564       | 13 (551,564)                      | 2.3              | 2.166E-02                               | 1.666E-03                  | 0.8                  |
| 31   | P5  | 577       | 19 (558,577)                      | 3.3              | 2.294E-02                               | 1.207E-03                  | 0.6                  |
| 32   | P5  | 584       | 14 (570,584)                      | 2.4              | 2.275E-02                               | 1.625E-03                  | 0.4                  |

|    |    |      |                |     |           |           |     |
|----|----|------|----------------|-----|-----------|-----------|-----|
| 33 | P5 | 590  | 20 (577,597)   | 3.4 | 2.273E-02 | 1.136E-03 | 0.9 |
| 34 | P5 | 604  | 14 (590,604)   | 2.3 | 2.255E-02 | 1.611E-03 | 0.6 |
| 35 | P5 | 611  | 14 (597,611)   | 2.3 | 2.231E-02 | 1.594E-03 | 0.5 |
| 36 | P5 | 618  | 21 (604,625)   | 3.4 | 2.191E-02 | 1.043E-03 | 0.7 |
| 37 | P5 | 632  | 21 (611,632)   | 3.3 | 2.202E-02 | 1.049E-03 | 0.8 |
| 38 | P5 | 639  | 14 (625,639)   | 2.2 | 2.124E-02 | 1.517E-03 | 0.4 |
| 39 | P6 | 708  | 16 (692,708)   | 2.3 | 1.895E-02 | 1.184E-03 | 0.4 |
| 40 | P6 | 716  | 24 (700,724)   | 3.4 | 1.949E-02 | 8.121E-04 | 0.6 |
| 41 | P6 | 724  | 25 (708,733)   | 3.5 | 1.973E-02 | 7.892E-04 | 0.8 |
| 42 | P6 | 733  | 25 (716,741)   | 3.4 | 1.981E-02 | 7.924E-04 | 0.9 |
| 43 | P6 | 749  | 16 (733,749)   | 2.1 | 1.997E-02 | 1.248E-03 | 0.9 |
| 44 | P6 | 758  | 17 (741,758)   | 2.2 | 1.976E-02 | 1.162E-03 | 0.7 |
| 45 | P6 | 767  | 18 (749,767)   | 2.3 | 1.937E-02 | 1.076E-03 | 0.5 |
| 46 | P6 | 775  | 17 (758,775)   | 2.2 | 1.923E-02 | 1.131E-03 | 0.3 |
| 47 | P6 | 784  | 17 (767,784)   | 2.2 | 1.891E-02 | 1.112E-03 | 0.3 |
| 48 | P6 | 793  | 18 (775,793)   | 2.3 | 1.801E-02 | 1.001E-03 | 0.3 |
| 49 | P7 | 861  | 22 (842,864)   | 2.6 | 1.457E-02 | 6.623E-04 | 0.8 |
| 50 | P7 | 870  | 22 (851,873)   | 2.6 | 1.541E-02 | 6.941E-04 | 0.6 |
| 51 | P7 | 879  | 23 (859,882)   | 2.6 | 1.591E-02 | 7.040E-04 | 0.4 |
| 52 | P7 | 888  | 23 (868,891)   | 2.6 | 1.563E-02 | 6.855E-04 | 0.5 |
| 53 | P7 | 897  | 23 (877,900)   | 2.6 | 1.583E-02 | 6.883E-04 | 0.6 |
| 54 | P7 | 906  | 23 (886,909)   | 2.6 | 1.581E-02 | 6.785E-04 | 0.9 |
| 55 | P7 | 915  | 24 (894,918)   | 2.6 | 1.560E-02 | 6.638E-04 | 1.1 |
| 56 | P7 | 924  | 24 (903,927)   | 2.6 | 1.548E-02 | 6.532E-04 | 0.8 |
| 57 | P7 | 933  | 24 (912,936)   | 2.6 | 1.518E-02 | 6.299E-04 | 0.5 |
| 58 | P7 | 942  | 24 (921,945)   | 2.6 | 1.480E-02 | 6.091E-04 | 0.5 |
| 59 | P7 | 951  | 24 (930,954)   | 2.6 | 1.494E-02 | 6.098E-04 | 0.8 |
| 60 | P8 | 1021 | 23 (998,1022)  | 2.3 | 1.284E-02 | 5.583E-04 | 0.5 |
| 61 | P8 | 1030 | 24 (1007,1031) | 2.3 | 1.349E-02 | 5.740E-04 | 0.8 |
| 62 | P8 | 1038 | 24 (1016,1040) | 2.3 | 1.347E-02 | 5.660E-04 | 0.9 |
| 63 | P8 | 1047 | 24 (1025,1049) | 2.3 | 1.316E-02 | 5.416E-04 | 1.0 |
| 64 | P8 | 1056 | 25 (1034,1059) | 2.3 | 1.344E-02 | 5.441E-04 | 0.4 |
| 65 | P8 | 1064 | 25 (1043,1068) | 2.4 | 1.332E-02 | 5.307E-04 | 0.9 |
| 66 | P8 | 1073 | 26 (1052,1077) | 2.4 | 1.350E-02 | 5.294E-04 | 1.2 |
| 67 | P8 | 1082 | 26 (1060,1086) | 2.4 | 1.310E-02 | 5.058E-04 | 0.7 |
| 68 | P8 | 1090 | 26 (1069,1096) | 2.4 | 1.304E-02 | 4.958E-04 | 0.6 |
| 69 | P8 | 1099 | 27 (1078,1105) | 2.4 | 1.310E-02 | 4.888E-04 | 1.3 |
| 70 | P8 | 1108 | 27 (1087,1114) | 2.4 | 1.220E-02 | 4.502E-04 | 1.1 |

Probe A (HIGH)

Table 7: Energy/Flux Calibration Factors for the Histogram Electron Channels. Histogram LUT ID (HIGH-A): 29442, for times between 2012/09/01 and 2013/08/03.

| CH # | PIX | $E$<br>[keV] | $\Delta E (E_{lo}, E_{hi})$<br>[keV] | $\Delta E/E$<br>[%] | $G_0 \Delta E$<br>[cm <sup>2</sup> sr keV] | $G_0$<br>[cm <sup>2</sup> sr] | $\Delta G_0/G_0$<br>[%] |
|------|-----|--------------|--------------------------------------|---------------------|--------------------------------------------|-------------------------------|-------------------------|
| 0    | P0  | 970          | 152 (844,996)                        | 15.7                | 1.020E-01                                  | 6.689E-04                     | 4.3                     |
| 1    | P0  | 992          | 140 (884,1024)                       | 14.1                | 1.050E-01                                  | 7.527E-04                     | 3.9                     |
| 2    | P0  | 1016         | 146 (905,1050)                       | 14.3                | 1.110E-01                                  | 7.629E-04                     | 3.4                     |
| 3    | P0  | 1039         | 130 (948,1078)                       | 12.5                | 1.200E-01                                  | 9.266E-04                     | 3.7                     |
| 4    | P0  | 1088         | 134 (970,1104)                       | 12.4                | 1.380E-01                                  | 1.026E-03                     | 3.0                     |
| 5    | P0  | 1114         | 116 (1016,1132)                      | 10.4                | 1.270E-01                                  | 1.100E-03                     | 2.6                     |
| 6    | P0  | 1140         | 119 (1039,1158)                      | 10.5                | 1.270E-01                                  | 1.064E-03                     | 1.9                     |
| 7    | P0  | 1167         | 97 (1088,1185)                       | 8.3                 | 1.160E-01                                  | 1.191E-03                     | 2.1                     |
| 8    | P0  | 1194         | 98 (1114,1212)                       | 8.2                 | 1.110E-01                                  | 1.128E-03                     | 2.5                     |
| 9    | P0  | 1250         | 72 (1178,1250)                       | 5.8                 | 1.140E-01                                  | 1.575E-03                     | 2.7                     |
| 10   | P0  | 1279         | 72 (1207,1279)                       | 5.7                 | 1.050E-01                                  | 1.450E-03                     | 1.8                     |
| 11   | P1  | 1576         | 219 (1407,1626)                      | 13.9                | 5.450E-02                                  | 2.491E-04                     | 2.7                     |
| 12   | P1  | 1607         | 205 (1446,1650)                      | 12.7                | 6.210E-02                                  | 3.035E-04                     | 1.9                     |
| 13   | P1  | 1637         | 190 (1485,1675)                      | 11.6                | 6.080E-02                                  | 3.192E-04                     | 2.3                     |
| 14   | P1  | 1668         | 176 (1524,1700)                      | 10.6                | 6.060E-02                                  | 3.437E-04                     | 2.1                     |
| 15   | P1  | 1699         | 162 (1563,1725)                      | 9.5                 | 6.280E-02                                  | 3.872E-04                     | 1.2                     |
| 16   | P1  | 1730         | 148 (1601,1750)                      | 8.6                 | 6.420E-02                                  | 4.335E-04                     | 1.4                     |
| 17   | P1  | 1760         | 134 (1640,1774)                      | 7.6                 | 6.350E-02                                  | 4.739E-04                     | 2.2                     |
| 18   | P1  | 1791         | 120 (1679,1799)                      | 6.7                 | 5.800E-02                                  | 4.841E-04                     | 2.1                     |
| 19   | P1  | 1822         | 106 (1718,1824)                      | 5.8                 | 4.760E-02                                  | 4.503E-04                     | 1.1                     |
| 20   | P2  | 2218         | 223 (2012,2235)                      | 10.1                | 7.690E-02                                  | 3.450E-04                     | 2.2                     |
| 21   | P2  | 2251         | 220 (2048,2268)                      | 9.8                 | 8.460E-02                                  | 3.851E-04                     | 1.9                     |
| 22   | P2  | 2285         | 216 (2084,2301)                      | 9.5                 | 8.470E-02                                  | 3.914E-04                     | 1.9                     |
| 23   | P2  | 2318         | 213 (2121,2334)                      | 9.2                 | 8.930E-02                                  | 4.189E-04                     | 2.1                     |
| 24   | P2  | 2352         | 210 (2157,2367)                      | 8.9                 | 9.870E-02                                  | 4.702E-04                     | 1.5                     |
| 25   | P2  | 2386         | 207 (2193,2400)                      | 8.7                 | 9.120E-02                                  | 4.414E-04                     | 1.8                     |
| 26   | P2  | 2419         | 203 (2230,2433)                      | 8.4                 | 9.070E-02                                  | 4.459E-04                     | 1.4                     |
| 27   | P2  | 2453         | 200 (2266,2466)                      | 8.2                 | 9.700E-02                                  | 4.848E-04                     | 1.6                     |
| 28   | P2  | 2486         | 197 (2302,2499)                      | 7.9                 | 9.930E-02                                  | 5.046E-04                     | 2.2                     |
| 29   | P2  | 2520         | 194 (2338,2532)                      | 7.7                 | 9.720E-02                                  | 5.021E-04                     | 1.6                     |
| 30   | P2  | 2554         | 190 (2375,2565)                      | 7.4                 | 9.980E-02                                  | 5.247E-04                     | 1.7                     |
| 31   | P2  | 2587         | 187 (2411,2598)                      | 7.2                 | 9.020E-02                                  | 4.824E-04                     | 1.7                     |
| 32   | P2  | 2621         | 184 (2447,2631)                      | 7.0                 | 8.820E-02                                  | 4.801E-04                     | 1.5                     |
| 33   | P2  | 2654         | 180 (2483,2664)                      | 6.8                 | 8.960E-02                                  | 4.967E-04                     | 2.2                     |
| 34   | P2  | 2688         | 177 (2520,2697)                      | 6.6                 | 8.710E-02                                  | 4.915E-04                     | 1.4                     |
| 35   | P2  | 2722         | 174 (2556,2730)                      | 6.4                 | 9.260E-02                                  | 5.325E-04                     | 2.2                     |
| 36   | P2  | 2755         | 171 (2592,2763)                      | 6.2                 | 7.510E-02                                  | 4.402E-04                     | 1.9                     |
| 37   | P2  | 2789         | 167 (2628,2796)                      | 6.0                 | 8.270E-02                                  | 4.940E-04                     | 2.4                     |
| 38   | P2  | 2822         | 164 (2665,2829)                      | 5.8                 | 6.750E-02                                  | 4.113E-04                     | 2.0                     |
| 39   | P2  | 2856         | 161 (2701,2862)                      | 5.6                 | 7.050E-02                                  | 4.382E-04                     | 1.8                     |
| 40   | P3  | 3723         | 353 (3472,3825)                      | 9.5                 | 1.410E-01                                  | 3.999E-04                     | 4.7                     |
| 41   | P3  | 3759         | 346 (3510,3855)                      | 9.2                 | 1.310E-01                                  | 3.791E-04                     | 4.1                     |
| 42   | P3  | 3794         | 338 (3547,3886)                      | 8.9                 | 1.320E-01                                  | 3.900E-04                     | 3.8                     |
| 43   | P3  | 3830         | 331 (3585,3916)                      | 8.7                 | 1.270E-01                                  | 3.833E-04                     | 4.6                     |
| 44   | P3  | 3865         | 324 (3622,3946)                      | 8.4                 | 1.490E-01                                  | 4.596E-04                     | 3.7                     |
| 45   | P3  | 3901         | 317 (3659,3976)                      | 8.1                 | 1.400E-01                                  | 4.415E-04                     | 3.8                     |
| 46   | P3  | 3936         | 310 (3697,4007)                      | 7.9                 | 1.470E-01                                  | 4.742E-04                     | 4.9                     |
| 47   | P3  | 3972         | 303 (3734,4037)                      | 7.6                 | 1.680E-01                                  | 5.546E-04                     | 3.3                     |
| 48   | P3  | 4007         | 296 (3772,4067)                      | 7.4                 | 1.360E-01                                  | 4.599E-04                     | 3.7                     |
| 49   | P3  | 4043         | 289 (3809,4098)                      | 7.1                 | 1.660E-01                                  | 5.750E-04                     | 4.1                     |
| 50   | P3  | 4078         | 282 (3846,4128)                      | 6.9                 | 1.390E-01                                  | 4.938E-04                     | 3.3                     |
| 51   | P3  | 4114         | 274 (3884,4158)                      | 6.7                 | 1.670E-01                                  | 6.086E-04                     | 4.9                     |
| 52   | P3  | 4149         | 267 (3921,4188)                      | 6.4                 | 1.490E-01                                  | 5.574E-04                     | 3.6                     |
| 53   | P3  | 4185         | 260 (3958,4218)                      | 6.2                 | 1.350E-01                                  | 5.188E-04                     | 3.5                     |
| 54   | P3  | 4220         | 253 (3996,4249)                      | 6.0                 | 1.520E-01                                  | 6.006E-04                     | 5.0                     |
| 55   | P3  | 4256         | 246 (4033,4279)                      | 5.8                 | 1.400E-01                                  | 5.693E-04                     | 2.8                     |
| 56   | P3  | 4291         | 239 (4070,4309)                      | 5.6                 | 1.150E-01                                  | 4.816E-04                     | 5.1                     |
| 57   | P3  | 4327         | 232 (4108,4340)                      | 5.4                 | 1.390E-01                                  | 5.997E-04                     | 4.3                     |
| 58   | P3  | 4362         | 225 (4145,4370)                      | 5.1                 | 1.280E-01                                  | 5.699E-04                     | 3.4                     |
| 59   | P3  | 4398         | 218 (4183,4400)                      | 4.9                 | 1.150E-01                                  | 5.287E-04                     | 5.1                     |
| 60   | P3  | 4433         | 210 (4223,4433)                      | 4.7                 | 1.280E-01                                  | 6.087E-04                     | 3.0                     |

|    |    |      |                 |     |           |           |     |
|----|----|------|-----------------|-----|-----------|-----------|-----|
| 61 | P3 | 4469 | 203 (4266,4469) | 4.5 | 1.040E-01 | 5.118E-04 | 3.5 |
| 62 | P3 | 4504 | 196 (4308,4504) | 4.4 | 1.180E-01 | 6.017E-04 | 5.3 |

Table 8: Energy/Flux Calibration Factors for the Histogram Electron Channels. Histogram LUT ID (HIGH-A): 29442, for times between 2013/08/03 and 2019/10/14.

| CH # | PIX | $E$ [keV] | $\Delta E (E_{lo}, E_{hi})$ [keV] | $\Delta E/E$ [%] | $G_0 \Delta E$ [cm <sup>2</sup> sr keV] | $G_0$ [cm <sup>2</sup> sr] | $\Delta G_0/G_0$ [%] |
|------|-----|-----------|-----------------------------------|------------------|-----------------------------------------|----------------------------|----------------------|
| 0    | P0  | 970       | 91 (884,975)                      | 9.4              | 2.400E-01                               | 2.646E-03                  | 2.5                  |
| 1    | P0  | 992       | 82 (926,1008)                     | 8.2              | 2.520E-01                               | 3.088E-03                  | 3.1                  |
| 2    | P0  | 1039      | 93 (948,1041)                     | 8.9              | 3.030E-01                               | 3.272E-03                  | 2.8                  |
| 3    | P0  | 1064      | 82 (992,1074)                     | 7.7              | 3.000E-01                               | 3.676E-03                  | 1.6                  |
| 4    | P0  | 1088      | 91 (1016,1107)                    | 8.3              | 3.050E-01                               | 3.366E-03                  | 1.6                  |
| 5    | P0  | 1114      | 76 (1064,1140)                    | 6.8              | 2.870E-01                               | 3.796E-03                  | 2.5                  |
| 6    | P0  | 1167      | 85 (1088,1173)                    | 7.2              | 3.120E-01                               | 3.688E-03                  | 2.1                  |
| 7    | P0  | 1194      | 92 (1114,1206)                    | 7.7              | 2.920E-01                               | 3.188E-03                  | 1.0                  |
| 8    | P0  | 1222      | 72 (1167,1239)                    | 5.9              | 2.530E-01                               | 3.534E-03                  | 1.3                  |
| 9    | P0  | 1250      | 78 (1194,1272)                    | 6.2              | 2.260E-01                               | 2.916E-03                  | 2.3                  |
| 10   | P1  | 1480      | 161 (1340,1501)                   | 10.9             | 1.380E-01                               | 8.582E-04                  | 2.4                  |
| 11   | P1  | 1511      | 156 (1375,1530)                   | 10.3             | 1.450E-01                               | 9.325E-04                  | 2.3                  |
| 12   | P1  | 1542      | 150 (1409,1559)                   | 9.7              | 1.690E-01                               | 1.126E-03                  | 1.6                  |
| 13   | P1  | 1573      | 145 (1443,1588)                   | 9.2              | 1.840E-01                               | 1.271E-03                  | 1.9                  |
| 14   | P1  | 1604      | 139 (1477,1616)                   | 8.7              | 1.900E-01                               | 1.363E-03                  | 2.3                  |
| 15   | P1  | 1635      | 134 (1511,1645)                   | 8.2              | 1.880E-01                               | 1.403E-03                  | 1.8                  |
| 16   | P1  | 1666      | 129 (1545,1674)                   | 7.7              | 1.820E-01                               | 1.414E-03                  | 1.4                  |
| 17   | P1  | 1697      | 123 (1580,1703)                   | 7.3              | 1.869E-01                               | 1.516E-03                  | 0.9                  |
| 18   | P1  | 1728      | 118 (1614,1732)                   | 6.8              | 1.820E-01                               | 1.545E-03                  | 1.1                  |
| 19   | P1  | 1759      | 112 (1648,1760)                   | 6.4              | 1.680E-01                               | 1.493E-03                  | 1.5                  |
| 20   | P1  | 1790      | 107 (1683,1790)                   | 6.0              | 1.510E-01                               | 1.409E-03                  | 1.8                  |
| 21   | P2  | 2309      | 136 (2173,2309)                   | 5.9              | 1.770E-01                               | 1.301E-03                  | 1.7                  |
| 22   | P2  | 2344      | 138 (2206,2344)                   | 5.9              | 1.780E-01                               | 1.295E-03                  | 1.7                  |
| 23   | P2  | 2378      | 139 (2239,2378)                   | 5.8              | 1.940E-01                               | 1.395E-03                  | 1.5                  |
| 24   | P2  | 2413      | 141 (2272,2413)                   | 5.8              | 1.870E-01                               | 1.329E-03                  | 2.1                  |
| 25   | P2  | 2447      | 142 (2305,2447)                   | 5.8              | 2.030E-01                               | 1.427E-03                  | 1.2                  |
| 26   | P2  | 2482      | 144 (2338,2482)                   | 5.8              | 2.310E-01                               | 1.606E-03                  | 2.1                  |
| 27   | P2  | 2516      | 145 (2371,2516)                   | 5.8              | 2.060E-01                               | 1.418E-03                  | 1.3                  |
| 28   | P2  | 2551      | 147 (2404,2551)                   | 5.8              | 2.180E-01                               | 1.484E-03                  | 1.6                  |
| 29   | P2  | 2585      | 148 (2437,2585)                   | 5.7              | 1.850E-01                               | 1.246E-03                  | 2.3                  |
| 30   | P2  | 2620      | 150 (2470,2620)                   | 5.7              | 2.200E-01                               | 1.466E-03                  | 1.3                  |
| 31   | P2  | 2654      | 152 (2502,2654)                   | 5.7              | 2.200E-01                               | 1.451E-03                  | 2.4                  |
| 32   | P2  | 2689      | 153 (2536,2689)                   | 5.7              | 1.960E-01                               | 1.280E-03                  | 1.2                  |
| 33   | P2  | 2723      | 155 (2568,2723)                   | 5.7              | 2.040E-01                               | 1.319E-03                  | 1.9                  |
| 34   | P2  | 2758      | 156 (2601,2758)                   | 5.7              | 1.790E-01                               | 1.145E-03                  | 1.9                  |
| 35   | P2  | 2792      | 158 (2634,2792)                   | 5.7              | 1.840E-01                               | 1.165E-03                  | 1.5                  |
| 36   | P2  | 2826      | 159 (2667,2826)                   | 5.6              | 1.550E-01                               | 9.730E-04                  | 2.4                  |
| 37   | P2  | 2861      | 161 (2700,2861)                   | 5.6              | 1.710E-01                               | 1.063E-03                  | 1.3                  |
| 38   | P3  | 3789      | 293 (3536,3829)                   | 7.7              | 1.160E-01                               | 3.963E-04                  | 5.4                  |
| 39   | P3  | 3825      | 290 (3574,3865)                   | 7.6              | 1.450E-01                               | 4.995E-04                  | 5.1                  |
| 40   | P3  | 3862      | 288 (3612,3900)                   | 7.5              | 1.370E-01                               | 4.757E-04                  | 3.9                  |
| 41   | P3  | 3898      | 286 (3650,3936)                   | 7.3              | 1.280E-01                               | 4.480E-04                  | 4.1                  |
| 42   | P3  | 3935      | 283 (3688,3972)                   | 7.2              | 1.400E-01                               | 4.940E-04                  | 3.9                  |
| 43   | P3  | 3971      | 281 (3726,4007)                   | 7.1              | 1.490E-01                               | 5.301E-04                  | 3.3                  |
| 44   | P3  | 4008      | 279 (3764,4043)                   | 7.0              | 1.380E-01                               | 4.950E-04                  | 5.2                  |
| 45   | P3  | 4044      | 276 (3802,4078)                   | 6.8              | 1.580E-01                               | 5.716E-04                  | 3.6                  |
| 46   | P3  | 4081      | 274 (3840,4114)                   | 6.7              | 1.420E-01                               | 5.179E-04                  | 3.6                  |
| 47   | P3  | 4117      | 272 (3878,4150)                   | 6.6              | 1.600E-01                               | 5.887E-04                  | 4.3                  |
| 48   | P3  | 4154      | 270 (3916,4186)                   | 6.5              | 1.570E-01                               | 5.823E-04                  | 3.5                  |
| 49   | P3  | 4190      | 267 (3954,4221)                   | 6.4              | 1.340E-01                               | 5.015E-04                  | 4.9                  |
| 50   | P3  | 4226      | 265 (3992,4257)                   | 6.3              | 1.590E-01                               | 6.002E-04                  | 4.5                  |
| 51   | P3  | 4263      | 263 (4030,4292)                   | 6.2              | 1.370E-01                               | 5.217E-04                  | 3.3                  |
| 52   | P3  | 4299      | 260 (4068,4328)                   | 6.1              | 1.540E-01                               | 5.916E-04                  | 5.0                  |
| 53   | P3  | 4336      | 258 (4106,4364)                   | 6.0              | 1.410E-01                               | 5.465E-04                  | 3.7                  |
| 54   | P3  | 4372      | 256 (4144,4399)                   | 5.8              | 1.260E-01                               | 4.928E-04                  | 4.0                  |
| 55   | P3  | 4409      | 253 (4182,4435)                   | 5.7              | 1.190E-01                               | 4.698E-04                  | 5.0                  |
| 56   | P3  | 4445      | 251 (4220,4471)                   | 5.6              | 1.240E-01                               | 4.938E-04                  | 3.1                  |



|    |    |      |                 |     |           |           |     |
|----|----|------|-----------------|-----|-----------|-----------|-----|
| 57 | P3 | 4482 | 249 (4258,4506) | 5.5 | 1.160E-01 | 4.664E-04 | 4.6 |
| 58 | P3 | 4518 | 246 (4296,4542) | 5.5 | 1.280E-01 | 5.193E-04 | 5.0 |

Probe B (LOW)

Table 9: Energy/Flux Calibration Factors for the Histogram Electron Channels. Histogram LUT ID (LOW-B): 17664.

| CH # | PIX | $E$ [keV] | $\Delta E (E_{lo}, E_{hi})$ [keV] | $\Delta E/E$ [%] | $G_0 \Delta E$ [cm <sup>2</sup> sr keV] | $G_0$ [cm <sup>2</sup> sr] | $\Delta G_0/G_0$ [%] |
|------|-----|-----------|-----------------------------------|------------------|-----------------------------------------|----------------------------|----------------------|
| 0    | P1  | 21.7      | 1.2 (20.7,21.9)                   | 5.5              | 3.963E-03                               | 3.303E-03                  | 0.5                  |
| 1    | P1  | 22.7      | 1.2 (21.7,22.9)                   | 5.3              | 3.936E-03                               | 3.280E-03                  | 0.6                  |
| 2    | P1  | 23.7      | 1.3 (22.7,24.0)                   | 5.5              | 3.930E-03                               | 3.023E-03                  | 0.8                  |
| 3    | P1  | 24.6      | 1.1 (23.7,24.8)                   | 4.5              | 3.871E-03                               | 3.519E-03                  | 0.6                  |
| 4    | P1  | 25.7      | 1.4 (24.6,26.0)                   | 5.4              | 3.841E-03                               | 2.744E-03                  | 0.7                  |
| 5    | P2  | 32.3      | 1.4 (31.2,32.6)                   | 4.3              | 3.373E-03                               | 2.409E-03                  | 0.4                  |
| 6    | P2  | 33.4      | 1.1 (32.3,33.4)                   | 3.3              | 3.426E-03                               | 3.115E-03                  | 0.8                  |
| 7    | P2  | 34.2      | 1.6 (33.0,34.6)                   | 4.7              | 3.389E-03                               | 2.118E-03                  | 0.4                  |
| 8    | P2  | 34.9      | 1.1 (34.2,35.3)                   | 3.2              | 3.363E-03                               | 3.057E-03                  | 0.8                  |
| 9    | P2  | 36.2      | 1.7 (34.9,36.6)                   | 4.7              | 3.379E-03                               | 1.988E-03                  | 0.4                  |
| 10   | P2  | 37.0      | 1.2 (36.2,37.4)                   | 3.2              | 3.368E-03                               | 2.807E-03                  | 0.4                  |
| 11   | P2  | 37.8      | 1.3 (37.0,38.3)                   | 3.4              | 3.298E-03                               | 2.537E-03                  | 0.5                  |
| 12   | P2  | 39.2      | 1.4 (37.8,39.2)                   | 3.6              | 3.336E-03                               | 2.383E-03                  | 0.7                  |
| 13   | P2  | 40.1      | 1.4 (38.7,40.1)                   | 3.5              | 3.268E-03                               | 2.334E-03                  | 0.6                  |
| 14   | P2  | 41.0      | 1.4 (39.6,41.0)                   | 3.4              | 3.209E-03                               | 2.292E-03                  | 0.5                  |
| 15   | P3  | 48.6      | 1.7 (47.5,49.2)                   | 3.5              | 2.861E-03                               | 1.683E-03                  | 0.3                  |
| 16   | P3  | 49.7      | 1.1 (48.6,49.7)                   | 2.2              | 2.948E-03                               | 2.680E-03                  | 0.6                  |
| 17   | P3  | 50.3      | 1.7 (49.2,50.9)                   | 3.4              | 2.929E-03                               | 1.723E-03                  | 0.5                  |
| 18   | P3  | 51.5      | 1.7 (50.3,52.0)                   | 3.3              | 2.985E-03                               | 1.756E-03                  | 0.3                  |
| 19   | P3  | 52.6      | 1.1 (51.5,52.6)                   | 2.1              | 2.987E-03                               | 2.715E-03                  | 0.5                  |
| 20   | P3  | 53.2      | 1.8 (52.0,53.8)                   | 3.4              | 2.967E-03                               | 1.648E-03                  | 0.4                  |
| 21   | P3  | 54.5      | 1.3 (53.2,54.5)                   | 2.4              | 2.978E-03                               | 2.291E-03                  | 0.4                  |
| 22   | P3  | 55.1      | 1.9 (53.8,55.7)                   | 3.4              | 2.920E-03                               | 1.537E-03                  | 0.5                  |
| 23   | P3  | 56.4      | 1.3 (55.1,56.4)                   | 2.3              | 2.930E-03                               | 2.254E-03                  | 0.3                  |
| 24   | P3  | 57.0      | 1.9 (55.7,57.6)                   | 3.3              | 2.901E-03                               | 1.527E-03                  | 0.5                  |
| 25   | P3  | 58.3      | 1.3 (57.0,58.3)                   | 2.2              | 2.911E-03                               | 2.239E-03                  | 0.3                  |
| 26   | P3  | 59.0      | 2.1 (57.6,59.7)                   | 3.6              | 2.872E-03                               | 1.368E-03                  | 0.4                  |
| 27   | P3  | 60.3      | 1.3 (59.0,60.3)                   | 2.2              | 2.900E-03                               | 2.231E-03                  | 0.5                  |
| 28   | P3  | 61.0      | 2.0 (59.7,61.7)                   | 3.3              | 2.792E-03                               | 1.396E-03                  | 0.3                  |
| 29   | P4  | 70.7      | 2.4 (69.2,71.6)                   | 3.4              | 2.502E-03                               | 1.043E-03                  | 0.2                  |
| 30   | P4  | 71.6      | 1.7 (70.7,72.4)                   | 2.4              | 2.555E-03                               | 1.503E-03                  | 0.5                  |
| 31   | P4  | 72.4      | 1.6 (71.6,73.2)                   | 2.2              | 2.602E-03                               | 1.626E-03                  | 0.7                  |
| 32   | P4  | 74.0      | 1.6 (72.4,74.0)                   | 2.2              | 2.620E-03                               | 1.638E-03                  | 0.4                  |
| 33   | P4  | 74.9      | 1.7 (73.2,74.9)                   | 2.3              | 2.624E-03                               | 1.544E-03                  | 0.2                  |
| 34   | P4  | 75.7      | 2.6 (74.0,76.6)                   | 3.4              | 2.620E-03                               | 1.008E-03                  | 0.2                  |
| 35   | P4  | 76.6      | 2.6 (74.9,77.5)                   | 3.4              | 2.566E-03                               | 9.869E-04                  | 0.3                  |
| 36   | P4  | 77.5      | 2.7 (75.7,78.4)                   | 3.5              | 2.597E-03                               | 9.619E-04                  | 0.3                  |
| 37   | P4  | 78.4      | 1.8 (77.5,79.3)                   | 2.3              | 2.589E-03                               | 1.438E-03                  | 0.5                  |
| 38   | P4  | 79.3      | 1.8 (78.4,80.2)                   | 2.3              | 2.545E-03                               | 1.414E-03                  | 0.6                  |
| 39   | P4  | 80.2      | 1.8 (79.3,81.1)                   | 2.2              | 2.542E-03                               | 1.412E-03                  | 0.7                  |
| 40   | P4  | 82.0      | 1.8 (80.2,82.0)                   | 2.2              | 2.605E-03                               | 1.447E-03                  | 0.7                  |
| 41   | P4  | 83.0      | 1.9 (81.1,83.0)                   | 2.3              | 2.567E-03                               | 1.351E-03                  | 0.6                  |
| 42   | P4  | 83.9      | 1.9 (82.0,83.9)                   | 2.3              | 2.527E-03                               | 1.330E-03                  | 0.6                  |
| 43   | P4  | 84.9      | 1.9 (83.0,84.9)                   | 2.2              | 2.558E-03                               | 1.346E-03                  | 0.6                  |
| 44   | P4  | 85.8      | 1.9 (83.9,85.8)                   | 2.2              | 2.564E-03                               | 1.349E-03                  | 0.5                  |
| 45   | P4  | 86.8      | 1.9 (84.9,86.8)                   | 2.2              | 2.533E-03                               | 1.333E-03                  | 0.6                  |
| 46   | P5  | 94.0      | 3.2 (91.9,95.1)                   | 3.4              | 4.671E-03                               | 1.460E-03                  | 0.2                  |
| 47   | P5  | 96.2      | 3.3 (94.0,97.3)                   | 3.4              | 4.810E-03                               | 1.458E-03                  | 0.3                  |
| 48   | P5  | 98.4      | 2.2 (96.2,98.4)                   | 2.2              | 4.870E-03                               | 2.214E-03                  | 0.7                  |
| 49   | P5  | 99.5      | 3.7 (97.3,101.0)                  | 3.7              | 4.729E-03                               | 1.278E-03                  | 0.4                  |
| 50   | P5  | 102.0     | 3.5 (99.5,103.0)                  | 3.4              | 4.676E-03                               | 1.336E-03                  | 0.2                  |
| 51   | P5  | 104.0     | 2.0 (102.0,104.0)                 | 1.9              | 4.724E-03                               | 2.362E-03                  | 0.5                  |
| 52   | P5  | 105.0     | 4.0 (103.0,107.0)                 | 3.8              | 4.539E-03                               | 1.135E-03                  | 0.4                  |
| 53   | P5  | 108.0     | 4.0 (105.0,109.0)                 | 3.7              | 4.606E-03                               | 1.151E-03                  | 0.2                  |
| 54   | P5  | 109.0     | 2.0 (108.0,110.0)                 | 1.8              | 4.500E-03                               | 2.250E-03                  | 0.6                  |
| 55   | P5  | 112.0     | 4.0 (109.0,113.0)                 | 3.6              | 4.520E-03                               | 1.130E-03                  | 0.2                  |
| 56   | P6  | 126.0     | 2.0 (124.0,126.0)                 | 1.6              | 4.229E-03                               | 2.115E-03                  | 0.8                  |
| 57   | P6  | 128.0     | 4.0 (125.0,129.0)                 | 3.1              | 4.322E-03                               | 1.081E-03                  | 0.2                  |
| 58   | P6  | 129.0     | 3.0 (128.0,131.0)                 | 2.3              | 4.250E-03                               | 1.417E-03                  | 0.4                  |
| 59   | P6  | 132.0     | 3.0 (129.0,132.0)                 | 2.3              | 4.253E-03                               | 1.418E-03                  | 0.7                  |
| 60   | P6  | 134.0     | 4.0 (131.0,135.0)                 | 3.0              | 4.190E-03                               | 1.048E-03                  | 0.2                  |
| 61   | P6  | 135.0     | 5.0 (132.0,137.0)                 | 3.7              | 4.090E-03                               | 8.180E-04                  | 0.4                  |

|    |    |       |                   |     |           |           |     |
|----|----|-------|-------------------|-----|-----------|-----------|-----|
| 62 | P6 | 137.0 | 3.0 (135.0,138.0) | 2.2 | 4.111E-03 | 1.370E-03 | 0.9 |
| 63 | P6 | 140.0 | 3.0 (137.0,140.0) | 2.1 | 4.143E-03 | 1.381E-03 | 0.5 |
| 64 | P6 | 142.0 | 5.0 (138.0,143.0) | 3.5 | 4.051E-03 | 8.102E-04 | 0.2 |
| 65 | P7 | 162.0 | 3.0 (159.0,162.0) | 1.9 | 3.875E-03 | 1.292E-03 | 0.8 |
| 66 | P7 | 164.0 | 6.0 (160.0,166.0) | 3.7 | 3.967E-03 | 6.612E-04 | 0.6 |
| 67 | P7 | 166.0 | 6.0 (162.0,168.0) | 3.6 | 3.968E-03 | 6.613E-04 | 0.4 |
| 68 | P7 | 168.0 | 6.0 (164.0,170.0) | 3.6 | 3.926E-03 | 6.543E-04 | 0.2 |
| 69 | P7 | 170.0 | 4.0 (168.0,172.0) | 2.4 | 3.867E-03 | 9.668E-04 | 0.2 |
| 70 | P7 | 172.0 | 4.0 (170.0,174.0) | 2.3 | 3.907E-03 | 9.767E-04 | 0.4 |
| 71 | P7 | 174.0 | 4.0 (172.0,176.0) | 2.3 | 3.856E-03 | 9.640E-04 | 0.7 |
| 72 | P7 | 176.0 | 4.0 (174.0,178.0) | 2.3 | 3.740E-03 | 9.350E-04 | 0.8 |
| 73 | P7 | 178.0 | 4.0 (176.0,180.0) | 2.2 | 3.749E-03 | 9.373E-04 | 0.9 |
| 74 | P7 | 180.0 | 4.0 (178.0,182.0) | 2.2 | 3.710E-03 | 9.275E-04 | 1.1 |
| 75 | P8 | 201.6 | 5.4 (198.2,203.6) | 2.7 | 3.023E-03 | 5.598E-04 | 0.5 |
| 76 | P8 | 203.6 | 5.4 (200.1,205.5) | 2.7 | 3.080E-03 | 5.704E-04 | 0.2 |
| 77 | P8 | 205.5 | 5.5 (202.0,207.5) | 2.7 | 3.153E-03 | 5.733E-04 | 0.7 |
| 78 | P8 | 207.4 | 5.5 (203.9,209.4) | 2.7 | 3.110E-03 | 5.655E-04 | 1.2 |
| 79 | P8 | 209.4 | 5.6 (205.8,211.4) | 2.7 | 3.104E-03 | 5.543E-04 | 0.9 |
| 80 | P8 | 211.3 | 5.6 (207.7,213.3) | 2.7 | 3.084E-03 | 5.507E-04 | 0.9 |
| 81 | P8 | 213.2 | 5.7 (209.6,215.3) | 2.7 | 3.061E-03 | 5.370E-04 | 0.2 |
| 82 | P8 | 215.2 | 5.6 (211.6,217.2) | 2.6 | 3.090E-03 | 5.518E-04 | 0.7 |
| 83 | P8 | 217.1 | 5.7 (213.5,219.2) | 2.6 | 3.090E-03 | 5.421E-04 | 1.5 |
| 84 | P8 | 219.0 | 5.7 (215.4,221.1) | 2.6 | 2.975E-03 | 5.219E-04 | 0.9 |
| 85 | P8 | 221.0 | 5.8 (217.3,223.1) | 2.6 | 3.009E-03 | 5.188E-04 | 0.7 |
| 86 | P8 | 222.9 | 5.8 (219.2,225.0) | 2.6 | 3.062E-03 | 5.279E-04 | 0.3 |
| 87 | P8 | 224.8 | 5.9 (221.1,227.0) | 2.6 | 2.970E-03 | 5.034E-04 | 1.3 |
| 88 | P8 | 226.8 | 5.9 (223.0,228.9) | 2.6 | 2.940E-03 | 4.983E-04 | 1.0 |
| 89 | P8 | 228.7 | 5.9 (225.0,230.9) | 2.6 | 2.961E-03 | 5.019E-04 | 0.8 |
| 90 | P8 | 230.7 | 5.9 (226.9,232.8) | 2.6 | 2.966E-03 | 5.027E-04 | 0.4 |

Table 10: Energy/Flux Calibration Factors for the Histogram Electron Channels. Histogram LUT ID (LOW-B): 18690.

| CH # | PIX | $E$ [keV] | $\Delta E (E_{lo}, E_{hi})$ [keV] | $\Delta E/E$ [%] | $G_0 \Delta E$ [cm <sup>2</sup> sr keV] | $G_0$ [cm <sup>2</sup> sr] | $\Delta G_0/G_0$ [%] |
|------|-----|-----------|-----------------------------------|------------------|-----------------------------------------|----------------------------|----------------------|
| 0    | P1  | 21.2      | 2.1 (19.8,21.9)                   | 9.9              | 7.952E-03                               | 3.787E-03                  | 0.7                  |
| 1    | P1  | 23.2      | 2.3 (21.7,24.0)                   | 9.9              | 7.874E-03                               | 3.423E-03                  | 0.8                  |
| 2    | P1  | 25.1      | 2.3 (23.7,26.0)                   | 9.2              | 7.728E-03                               | 3.360E-03                  | 0.5                  |
| 3    | P2  | 31.9      | 2.1 (30.5,32.6)                   | 6.6              | 6.641E-03                               | 3.162E-03                  | 0.6                  |
| 4    | P2  | 33.8      | 2.3 (32.3,34.6)                   | 6.8              | 6.820E-03                               | 2.965E-03                  | 0.5                  |
| 5    | P2  | 35.8      | 2.4 (34.2,36.6)                   | 6.7              | 6.800E-03                               | 2.833E-03                  | 0.7                  |
| 6    | P2  | 37.4      | 2.1 (36.2,38.3)                   | 5.6              | 6.670E-03                               | 3.176E-03                  | 0.4                  |
| 7    | P2  | 39.6      | 2.3 (37.8,40.1)                   | 5.8              | 6.605E-03                               | 2.872E-03                  | 0.7                  |
| 8    | P3  | 49.7      | 2.3 (48.6,50.9)                   | 4.6              | 5.820E-03                               | 2.530E-03                  | 0.7                  |
| 9    | P3  | 52.0      | 2.3 (50.3,52.6)                   | 4.4              | 5.971E-03                               | 2.596E-03                  | 0.4                  |
| 10   | P3  | 53.8      | 2.5 (52.0,54.5)                   | 4.6              | 5.951E-03                               | 2.380E-03                  | 0.3                  |
| 11   | P3  | 55.7      | 2.6 (53.8,56.4)                   | 4.7              | 5.854E-03                               | 2.252E-03                  | 0.3                  |
| 12   | P3  | 57.6      | 2.6 (55.7,58.3)                   | 4.5              | 5.819E-03                               | 2.238E-03                  | 0.3                  |
| 13   | P3  | 59.7      | 2.7 (57.6,60.3)                   | 4.5              | 5.775E-03                               | 2.139E-03                  | 0.3                  |
| 14   | P4  | 71.6      | 3.2 (69.2,72.4)                   | 4.5              | 5.115E-03                               | 1.598E-03                  | 0.4                  |
| 15   | P4  | 73.2      | 2.4 (71.6,74.0)                   | 3.3              | 5.223E-03                               | 2.176E-03                  | 0.2                  |
| 16   | P4  | 74.9      | 2.5 (73.2,75.7)                   | 3.3              | 5.181E-03                               | 2.072E-03                  | 0.6                  |
| 17   | P4  | 77.5      | 3.5 (74.9,78.4)                   | 4.5              | 5.223E-03                               | 1.492E-03                  | 0.5                  |
| 18   | P4  | 79.3      | 2.7 (77.5,80.2)                   | 3.4              | 5.198E-03                               | 1.925E-03                  | 0.3                  |
| 19   | P4  | 81.1      | 2.7 (79.3,82.0)                   | 3.3              | 5.154E-03                               | 1.909E-03                  | 0.2                  |
| 20   | P4  | 83.0      | 2.8 (81.1,83.9)                   | 3.4              | 5.045E-03                               | 1.802E-03                  | 0.2                  |
| 21   | P4  | 84.9      | 2.8 (83.0,85.8)                   | 3.3              | 5.066E-03                               | 1.809E-03                  | 0.3                  |
| 22   | P5  | 94.0      | 3.2 (91.9,95.1)                   | 3.4              | 4.671E-03                               | 1.460E-03                  | 0.2                  |
| 23   | P5  | 96.2      | 3.3 (94.0,97.3)                   | 3.4              | 4.810E-03                               | 1.458E-03                  | 0.3                  |
| 24   | P5  | 98.4      | 2.2 (96.2,98.4)                   | 2.2              | 4.870E-03                               | 2.214E-03                  | 0.7                  |
| 25   | P5  | 99.5      | 3.7 (97.3,101.0)                  | 3.7              | 4.729E-03                               | 1.278E-03                  | 0.4                  |
| 26   | P5  | 102.0     | 3.5 (99.5,103.0)                  | 3.4              | 4.676E-03                               | 1.336E-03                  | 0.2                  |
| 27   | P5  | 104.0     | 2.0 (102.0,104.0)                 | 1.9              | 4.724E-03                               | 2.362E-03                  | 0.5                  |
| 28   | P5  | 105.0     | 4.0 (103.0,107.0)                 | 3.8              | 4.539E-03                               | 1.135E-03                  | 0.4                  |
| 29   | P5  | 108.0     | 4.0 (105.0,109.0)                 | 3.7              | 4.606E-03                               | 1.151E-03                  | 0.2                  |
| 30   | P5  | 109.0     | 2.0 (108.0,110.0)                 | 1.8              | 4.500E-03                               | 2.250E-03                  | 0.6                  |

|    |    |       |                   |     |           |           |     |
|----|----|-------|-------------------|-----|-----------|-----------|-----|
| 31 | P5 | 112.0 | 4.0 (109.0,113.0) | 3.6 | 4.520E-03 | 1.130E-03 | 0.2 |
| 32 | P6 | 126.0 | 2.0 (124.0,126.0) | 1.6 | 4.229E-03 | 2.115E-03 | 0.8 |
| 33 | P6 | 128.0 | 4.0 (125.0,129.0) | 3.1 | 4.322E-03 | 1.081E-03 | 0.2 |
| 34 | P6 | 129.0 | 3.0 (128.0,131.0) | 2.3 | 4.250E-03 | 1.417E-03 | 0.4 |
| 35 | P6 | 132.0 | 3.0 (129.0,132.0) | 2.3 | 4.253E-03 | 1.418E-03 | 0.7 |
| 36 | P6 | 134.0 | 4.0 (131.0,135.0) | 3.0 | 4.190E-03 | 1.048E-03 | 0.2 |
| 37 | P6 | 135.0 | 5.0 (132.0,137.0) | 3.7 | 4.090E-03 | 8.180E-04 | 0.4 |
| 38 | P6 | 137.0 | 3.0 (135.0,138.0) | 2.2 | 4.111E-03 | 1.370E-03 | 0.9 |
| 39 | P6 | 140.0 | 3.0 (137.0,140.0) | 2.1 | 4.143E-03 | 1.381E-03 | 0.5 |
| 40 | P6 | 142.0 | 5.0 (138.0,143.0) | 3.5 | 4.051E-03 | 8.102E-04 | 0.2 |
| 41 | P7 | 162.0 | 3.0 (159.0,162.0) | 1.9 | 3.875E-03 | 1.292E-03 | 0.8 |
| 42 | P7 | 164.0 | 6.0 (160.0,166.0) | 3.7 | 3.967E-03 | 6.612E-04 | 0.6 |
| 43 | P7 | 166.0 | 6.0 (162.0,168.0) | 3.6 | 3.968E-03 | 6.613E-04 | 0.4 |
| 44 | P7 | 168.0 | 6.0 (164.0,170.0) | 3.6 | 3.926E-03 | 6.543E-04 | 0.2 |
| 45 | P7 | 170.0 | 4.0 (168.0,172.0) | 2.4 | 3.867E-03 | 9.668E-04 | 0.2 |
| 46 | P7 | 172.0 | 4.0 (170.0,174.0) | 2.3 | 3.907E-03 | 9.767E-04 | 0.4 |
| 47 | P7 | 174.0 | 4.0 (172.0,176.0) | 2.3 | 3.856E-03 | 9.640E-04 | 0.7 |
| 48 | P7 | 176.0 | 4.0 (174.0,178.0) | 2.3 | 3.740E-03 | 9.350E-04 | 0.8 |
| 49 | P7 | 178.0 | 4.0 (176.0,180.0) | 2.2 | 3.749E-03 | 9.373E-04 | 0.9 |
| 50 | P7 | 180.0 | 4.0 (178.0,182.0) | 2.2 | 3.710E-03 | 9.275E-04 | 1.1 |
| 51 | P8 | 202.0 | 4.7 (199.5,204.2) | 2.3 | 3.040E-03 | 6.468E-04 | 1.3 |
| 52 | P8 | 204.0 | 4.8 (201.4,206.2) | 2.4 | 3.082E-03 | 6.421E-04 | 0.9 |
| 53 | P8 | 206.0 | 4.9 (203.3,208.2) | 2.4 | 3.059E-03 | 6.243E-04 | 0.8 |
| 54 | P8 | 208.0 | 5.0 (205.2,210.2) | 2.4 | 3.097E-03 | 6.194E-04 | 0.3 |
| 55 | P8 | 210.0 | 5.1 (207.1,212.2) | 2.4 | 3.182E-03 | 6.239E-04 | 0.7 |
| 56 | P8 | 212.0 | 5.2 (209.0,214.2) | 2.5 | 3.080E-03 | 5.923E-04 | 1.3 |
| 57 | P8 | 214.0 | 5.3 (210.9,216.2) | 2.5 | 3.039E-03 | 5.734E-04 | 0.9 |
| 58 | P8 | 215.9 | 5.4 (212.8,218.2) | 2.5 | 3.045E-03 | 5.639E-04 | 0.9 |
| 59 | P8 | 217.9 | 5.5 (214.7,220.2) | 2.5 | 3.045E-03 | 5.536E-04 | 0.2 |
| 60 | P8 | 219.9 | 5.7 (216.6,222.3) | 2.6 | 3.020E-03 | 5.298E-04 | 0.9 |
| 61 | P8 | 221.9 | 5.8 (218.5,224.3) | 2.6 | 2.980E-03 | 5.138E-04 | 1.3 |
| 62 | P8 | 223.9 | 5.9 (220.4,226.3) | 2.6 | 2.960E-03 | 5.017E-04 | 1.0 |
| 63 | P8 | 225.9 | 6.0 (222.3,228.3) | 2.7 | 2.997E-03 | 4.995E-04 | 0.4 |
| 64 | P8 | 227.9 | 6.1 (224.2,230.3) | 2.7 | 2.991E-03 | 4.903E-04 | 0.9 |

Probe B (M35)

Table 11: Energy/Flux Calibration Factors for the Histogram Electron Channels. Histogram LUT ID (M35-B): 39168.

| CH # | PIX | $E$ [keV] | $\Delta E (E_{lo}, E_{hi})$ [keV] | $\Delta E/E$ [%] | $G_0 \Delta E$ [cm <sup>2</sup> sr keV] | $G_0$ [cm <sup>2</sup> sr] | $\Delta G_0/G_0$ [%] |
|------|-----|-----------|-----------------------------------|------------------|-----------------------------------------|----------------------------|----------------------|
| 0    | P1  | 141       | 6 (135,141)                       | 4.3              | 1.980E-02                               | 3.300E-03                  | 1.7                  |
| 1    | P1  | 144       | 6 (138,144)                       | 4.2              | 2.040E-02                               | 3.400E-03                  | 1.5                  |
| 2    | P1  | 149       | 7 (142,149)                       | 4.7              | 2.100E-02                               | 3.000E-03                  | 1.3                  |
| 3    | P1  | 154       | 7 (147,154)                       | 4.5              | 2.100E-02                               | 3.043E-03                  | 1.3                  |
| 4    | P1  | 160       | 7 (153,160)                       | 4.4              | 2.110E-02                               | 3.014E-03                  | 1.4                  |
| 5    | P1  | 163       | 7 (156,163)                       | 4.3              | 2.070E-02                               | 2.957E-03                  | 1.2                  |
| 6    | P1  | 169       | 6 (163,169)                       | 3.6              | 2.080E-02                               | 3.467E-03                  | 1.3                  |
| 7    | P1  | 173       | 8 (165,173)                       | 4.6              | 2.050E-02                               | 2.563E-03                  | 1.2                  |
| 8    | P1  | 179       | 6 (173,179)                       | 3.4              | 2.060E-02                               | 3.433E-03                  | 1.3                  |
| 9    | P1  | 183       | 8 (175,183)                       | 4.4              | 2.020E-02                               | 2.525E-03                  | 1.1                  |
| 10   | P1  | 187       | 6 (181,187)                       | 3.4              | 1.900E-02                               | 3.016E-03                  | 1.2                  |
| 11   | P2  | 227       | 8 (219,227)                       | 3.5              | 1.740E-02                               | 2.203E-03                  | 1.2                  |
| 12   | P2  | 230       | 6 (224,230)                       | 2.7              | 1.820E-02                               | 2.889E-03                  | 1.0                  |
| 13   | P2  | 235       | 7 (228,235)                       | 2.9              | 1.867E-02                               | 2.746E-03                  | 0.9                  |
| 14   | P2  | 240       | 7 (233,240)                       | 3.0              | 1.888E-02                               | 2.622E-03                  | 0.9                  |
| 15   | P2  | 246       | 9 (237,246)                       | 3.5              | 1.910E-02                               | 2.221E-03                  | 1.1                  |
| 16   | P2  | 249       | 7 (242,249)                       | 2.8              | 1.864E-02                               | 2.663E-03                  | 0.9                  |
| 17   | P2  | 254       | 8 (246,254)                       | 3.0              | 1.872E-02                               | 2.496E-03                  | 0.8                  |
| 18   | P2  | 257       | 6 (251,257)                       | 2.3              | 1.840E-02                               | 3.119E-03                  | 1.0                  |
| 19   | P2  | 263       | 7 (256,263)                       | 2.8              | 1.842E-02                               | 2.523E-03                  | 0.8                  |
| 20   | P2  | 269       | 9 (260,269)                       | 3.2              | 1.835E-02                               | 2.109E-03                  | 0.9                  |
| 21   | P2  | 272       | 7 (265,272)                       | 2.6              | 1.828E-02                               | 2.539E-03                  | 0.9                  |
| 22   | P2  | 279       | 10 (269,279)                      | 3.4              | 1.821E-02                               | 1.897E-03                  | 0.8                  |
| 23   | P2  | 282       | 8 (274,282)                       | 2.8              | 1.785E-02                               | 2.231E-03                  | 0.8                  |
| 24   | P3  | 330       | 9 (321,330)                       | 2.7              | 1.532E-02                               | 1.721E-03                  | 0.7                  |
| 25   | P3  | 334       | 8 (326,334)                       | 2.5              | 1.588E-02                               | 1.937E-03                  | 0.7                  |
| 26   | P3  | 338       | 8 (330,338)                       | 2.2              | 1.608E-02                               | 2.116E-03                  | 0.9                  |
| 27   | P3  | 346       | 11 (335,346)                      | 3.2              | 1.659E-02                               | 1.508E-03                  | 0.9                  |
| 28   | P3  | 350       | 10 (340,350)                      | 3.0              | 1.659E-02                               | 1.595E-03                  | 0.6                  |
| 29   | P3  | 354       | 9 (344,354)                       | 2.7              | 1.659E-02                               | 1.765E-03                  | 0.6                  |
| 30   | P3  | 358       | 9 (349,358)                       | 2.5              | 1.654E-02                               | 1.818E-03                  | 0.6                  |
| 31   | P3  | 362       | 8 (354,362)                       | 2.3              | 1.631E-02                               | 1.919E-03                  | 0.8                  |
| 32   | P3  | 370       | 12 (358,370)                      | 3.2              | 1.649E-02                               | 1.386E-03                  | 0.9                  |
| 33   | P3  | 374       | 11 (363,374)                      | 3.0              | 1.645E-02                               | 1.469E-03                  | 0.8                  |
| 34   | P3  | 379       | 12 (367,379)                      | 3.1              | 1.638E-02                               | 1.412E-03                  | 0.6                  |
| 35   | P3  | 383       | 11 (372,383)                      | 2.9              | 1.627E-02                               | 1.479E-03                  | 0.6                  |
| 36   | P3  | 387       | 10 (377,387)                      | 2.7              | 1.613E-02                               | 1.551E-03                  | 0.6                  |
| 37   | P3  | 392       | 11 (381,392)                      | 2.7              | 1.588E-02                               | 1.484E-03                  | 0.5                  |
| 38   | P3  | 396       | 10 (386,396)                      | 2.6              | 1.577E-02                               | 1.561E-03                  | 0.6                  |
| 39   | P4  | 445       | 14 (431,445)                      | 3.1              | 1.318E-02                               | 9.482E-04                  | 0.4                  |
| 40   | P4  | 449       | 14 (436,449)                      | 3.1              | 1.347E-02                               | 9.761E-04                  | 0.4                  |
| 41   | P4  | 454       | 14 (440,454)                      | 3.0              | 1.388E-02                               | 1.021E-03                  | 0.5                  |
| 42   | P4  | 459       | 14 (445,459)                      | 2.9              | 1.407E-02                               | 1.042E-03                  | 0.6                  |
| 43   | P4  | 463       | 13 (450,463)                      | 2.9              | 1.385E-02                               | 1.041E-03                  | 0.7                  |
| 44   | P4  | 468       | 13 (455,468)                      | 2.8              | 1.394E-02                               | 1.056E-03                  | 0.8                  |
| 45   | P4  | 473       | 13 (460,473)                      | 2.8              | 1.381E-02                               | 1.062E-03                  | 0.7                  |
| 46   | P4  | 477       | 13 (464,477)                      | 2.7              | 1.357E-02                               | 1.052E-03                  | 0.7                  |
| 47   | P4  | 482       | 13 (469,482)                      | 2.7              | 1.356E-02                               | 1.059E-03                  | 0.5                  |
| 48   | P4  | 487       | 13 (474,487)                      | 2.6              | 1.357E-02                               | 1.077E-03                  | 0.4                  |
| 49   | P4  | 491       | 12 (479,491)                      | 2.5              | 1.331E-02                               | 1.065E-03                  | 0.4                  |
| 50   | P4  | 496       | 12 (484,496)                      | 2.5              | 1.342E-02                               | 1.091E-03                  | 0.6                  |
| 51   | P4  | 501       | 12 (488,501)                      | 2.4              | 1.323E-02                               | 1.084E-03                  | 0.8                  |
| 52   | P4  | 505       | 12 (493,505)                      | 2.4              | 1.297E-02                               | 1.081E-03                  | 0.6                  |
| 53   | P4  | 510       | 12 (498,510)                      | 2.3              | 1.320E-02                               | 1.109E-03                  | 0.5                  |
| 54   | P4  | 514       | 12 (503,514)                      | 2.3              | 1.286E-02                               | 1.099E-03                  | 0.4                  |
| 55   | P5  | 571       | 14 (558,571)                      | 2.4              | 1.163E-02                               | 8.428E-04                  | 0.4                  |
| 56   | P5  | 576       | 14 (562,576)                      | 2.4              | 1.221E-02                               | 8.721E-04                  | 0.4                  |
| 57   | P5  | 581       | 14 (567,581)                      | 2.5              | 1.226E-02                               | 8.573E-04                  | 0.7                  |
| 58   | P5  | 586       | 15 (572,586)                      | 2.5              | 1.242E-02                               | 8.507E-04                  | 0.7                  |
| 59   | P5  | 591       | 15 (577,591)                      | 2.5              | 1.235E-02                               | 8.401E-04                  | 0.4                  |
| 60   | P5  | 596       | 15 (582,596)                      | 2.5              | 1.261E-02                               | 8.407E-04                  | 0.3                  |
| 61   | P5  | 601       | 15 (586,602)                      | 2.5              | 1.244E-02                               | 8.131E-04                  | 0.8                  |

|     |    |      |                |     |           |           |     |
|-----|----|------|----------------|-----|-----------|-----------|-----|
| 62  | P5 | 606  | 15 (591,607)   | 2.5 | 1.236E-02 | 8.026E-04 | 0.5 |
| 63  | P5 | 611  | 16 (596,612)   | 2.6 | 1.208E-02 | 7.694E-04 | 0.4 |
| 64  | P5 | 616  | 16 (601,617)   | 2.6 | 1.244E-02 | 7.775E-04 | 0.5 |
| 65  | P5 | 621  | 16 (606,622)   | 2.6 | 1.217E-02 | 7.559E-04 | 0.7 |
| 66  | P5 | 626  | 16 (610,627)   | 2.6 | 1.206E-02 | 7.354E-04 | 0.3 |
| 67  | P5 | 631  | 17 (615,632)   | 2.6 | 1.208E-02 | 7.234E-04 | 0.4 |
| 68  | P5 | 636  | 17 (620,637)   | 2.6 | 1.184E-02 | 7.048E-04 | 0.9 |
| 69  | P5 | 641  | 17 (625,642)   | 2.7 | 1.167E-02 | 6.825E-04 | 0.4 |
| 70  | P5 | 646  | 17 (630,647)   | 2.7 | 1.168E-02 | 6.751E-04 | 0.3 |
| 71  | P5 | 650  | 18 (635,652)   | 2.7 | 1.187E-02 | 6.744E-04 | 0.9 |
| 72  | P6 | 698  | 19 (683,701)   | 2.7 | 9.911E-03 | 5.328E-04 | 0.3 |
| 73  | P6 | 703  | 19 (688,706)   | 2.6 | 9.953E-03 | 5.351E-04 | 0.9 |
| 74  | P6 | 708  | 18 (692,711)   | 2.6 | 1.031E-02 | 5.573E-04 | 0.4 |
| 75  | P6 | 713  | 18 (697,716)   | 2.6 | 1.032E-02 | 5.609E-04 | 0.4 |
| 76  | P6 | 718  | 18 (702,721)   | 2.5 | 1.027E-02 | 5.612E-04 | 0.4 |
| 77  | P6 | 723  | 18 (707,725)   | 2.5 | 1.051E-02 | 5.775E-04 | 0.4 |
| 78  | P6 | 728  | 18 (712,730)   | 2.5 | 1.039E-02 | 5.709E-04 | 1.0 |
| 79  | P6 | 733  | 18 (717,735)   | 2.5 | 1.035E-02 | 5.687E-04 | 0.4 |
| 80  | P6 | 738  | 18 (722,740)   | 2.5 | 1.043E-02 | 5.762E-04 | 0.5 |
| 81  | P6 | 743  | 18 (727,745)   | 2.4 | 1.033E-02 | 5.739E-04 | 0.4 |
| 82  | P6 | 748  | 18 (732,750)   | 2.4 | 1.035E-02 | 5.750E-04 | 0.4 |
| 83  | P6 | 753  | 18 (736,754)   | 2.4 | 9.889E-03 | 5.525E-04 | 0.7 |
| 84  | P6 | 758  | 18 (741,759)   | 2.3 | 1.015E-02 | 5.702E-04 | 0.5 |
| 85  | P6 | 763  | 18 (746,764)   | 2.3 | 9.951E-03 | 5.622E-04 | 0.9 |
| 86  | P6 | 768  | 18 (751,769)   | 2.3 | 9.910E-03 | 5.599E-04 | 0.4 |
| 87  | P6 | 773  | 18 (756,774)   | 2.3 | 9.792E-03 | 5.532E-04 | 0.6 |
| 88  | P6 | 778  | 18 (761,778)   | 2.3 | 9.881E-03 | 5.614E-04 | 0.2 |
| 89  | P6 | 783  | 18 (766,783)   | 2.2 | 9.545E-03 | 5.454E-04 | 0.6 |
| 90  | P7 | 857  | 19 (839,857)   | 2.2 | 8.439E-03 | 4.489E-04 | 0.7 |
| 91  | P7 | 862  | 19 (843,862)   | 2.2 | 8.617E-03 | 4.488E-04 | 0.5 |
| 92  | P7 | 867  | 19 (848,867)   | 2.2 | 8.679E-03 | 4.474E-04 | 0.7 |
| 93  | P7 | 871  | 20 (852,872)   | 2.3 | 8.529E-03 | 4.329E-04 | 0.5 |
| 94  | P7 | 876  | 20 (857,877)   | 2.3 | 8.905E-03 | 4.453E-04 | 0.8 |
| 95  | P7 | 881  | 20 (861,882)   | 2.3 | 8.830E-03 | 4.350E-04 | 0.5 |
| 96  | P7 | 885  | 21 (866,887)   | 2.3 | 8.784E-03 | 4.264E-04 | 0.9 |
| 97  | P7 | 890  | 21 (871,892)   | 2.3 | 8.722E-03 | 4.173E-04 | 0.6 |
| 98  | P7 | 895  | 21 (875,896)   | 2.4 | 8.720E-03 | 4.113E-04 | 1.1 |
| 99  | P7 | 899  | 22 (880,901)   | 2.4 | 8.559E-03 | 3.981E-04 | 0.7 |
| 100 | P7 | 904  | 22 (884,906)   | 2.4 | 8.410E-03 | 3.858E-04 | 1.1 |
| 101 | P7 | 909  | 22 (889,911)   | 2.4 | 8.606E-03 | 3.894E-04 | 0.7 |
| 102 | P7 | 913  | 22 (894,916)   | 2.5 | 8.354E-03 | 3.729E-04 | 0.9 |
| 103 | P7 | 918  | 23 (898,921)   | 2.5 | 8.395E-03 | 3.715E-04 | 0.7 |
| 104 | P7 | 923  | 23 (903,926)   | 2.5 | 8.248E-03 | 3.602E-04 | 0.4 |
| 105 | P7 | 927  | 23 (907,931)   | 2.5 | 8.166E-03 | 3.520E-04 | 0.7 |
| 106 | P7 | 932  | 24 (912,936)   | 2.5 | 8.316E-03 | 3.539E-04 | 0.4 |
| 107 | P7 | 937  | 24 (917,940)   | 2.5 | 8.204E-03 | 3.447E-04 | 0.8 |
| 108 | P8 | 1018 | 25 (995,1021)  | 2.5 | 6.538E-03 | 2.574E-04 | 0.7 |
| 109 | P8 | 1023 | 25 (1000,1026) | 2.5 | 6.847E-03 | 2.696E-04 | 0.7 |
| 110 | P8 | 1028 | 25 (1005,1030) | 2.5 | 7.065E-03 | 2.781E-04 | 0.8 |
| 111 | P8 | 1033 | 26 (1009,1035) | 2.5 | 7.179E-03 | 2.815E-04 | 0.8 |
| 112 | P8 | 1037 | 25 (1014,1040) | 2.5 | 7.203E-03 | 2.825E-04 | 1.0 |
| 113 | P8 | 1042 | 26 (1019,1044) | 2.4 | 6.935E-03 | 2.720E-04 | 0.8 |
| 114 | P8 | 1047 | 26 (1024,1049) | 2.4 | 7.097E-03 | 2.783E-04 | 0.6 |
| 115 | P8 | 1051 | 26 (1028,1054) | 2.4 | 6.909E-03 | 2.699E-04 | 0.9 |
| 116 | P8 | 1056 | 26 (1033,1058) | 2.4 | 7.094E-03 | 2.771E-04 | 1.0 |
| 117 | P8 | 1061 | 26 (1038,1063) | 2.4 | 7.070E-03 | 2.762E-04 | 1.3 |
| 118 | P8 | 1066 | 26 (1042,1068) | 2.4 | 7.037E-03 | 2.728E-04 | 0.9 |
| 119 | P8 | 1070 | 26 (1047,1073) | 2.4 | 7.028E-03 | 2.724E-04 | 0.3 |
| 120 | P8 | 1075 | 26 (1052,1077) | 2.4 | 7.120E-03 | 2.760E-04 | 1.1 |
| 121 | P8 | 1080 | 26 (1056,1082) | 2.4 | 7.100E-03 | 2.752E-04 | 1.0 |
| 122 | P8 | 1084 | 26 (1061,1087) | 2.4 | 6.850E-03 | 2.645E-04 | 1.1 |
| 123 | P8 | 1089 | 26 (1066,1091) | 2.4 | 6.960E-03 | 2.687E-04 | 1.3 |
| 124 | P8 | 1094 | 26 (1070,1096) | 2.4 | 6.707E-03 | 2.590E-04 | 0.9 |
| 125 | P8 | 1098 | 26 (1075,1101) | 2.4 | 7.110E-03 | 2.735E-04 | 1.3 |
| 126 | P8 | 1103 | 26 (1080,1106) | 2.4 | 6.840E-03 | 2.631E-04 | 1.3 |
| 127 | P8 | 1108 | 26 (1084,1110) | 2.4 | 6.412E-03 | 2.457E-04 | 0.3 |
| 128 | P8 | 1112 | 26 (1089,1115) | 2.3 | 6.500E-03 | 2.490E-04 | 1.3 |



Table 12: Energy/Flux Calibration Factors for the Histogram Electron Channels. Histogram LUT ID (M35-B): 39169.

| CH # | PIX | $E$ [keV] | $\Delta E (E_{lo}, E_{hi})$ [keV] | $\Delta E/E$ [%] | $G_0 \Delta E$ [cm <sup>2</sup> sr keV] | $G_0$ [cm <sup>2</sup> sr] | $\Delta G_0/G_0$ [%] |
|------|-----|-----------|-----------------------------------|------------------|-----------------------------------------|----------------------------|----------------------|
| 0    | P1  | 142       | 11 (133,144)                      | 7.7              | 4.030E-02                               | 3.664E-03                  | 1.5                  |
| 1    | P1  | 151       | 12 (142,154)                      | 7.9              | 4.160E-02                               | 3.467E-03                  | 1.5                  |
| 2    | P1  | 161       | 12 (151,163)                      | 7.5              | 4.180E-02                               | 3.483E-03                  | 1.2                  |
| 3    | P1  | 171       | 12 (161,173)                      | 7.0              | 4.140E-02                               | 3.450E-03                  | 1.2                  |
| 4    | P1  | 181       | 12 (171,183)                      | 6.6              | 4.080E-02                               | 3.400E-03                  | 1.2                  |
| 5    | P2  | 227       | 13 (217,230)                      | 5.7              | 3.540E-02                               | 2.723E-03                  | 1.2                  |
| 6    | P2  | 238       | 11 (227,238)                      | 4.6              | 3.753E-02                               | 3.412E-03                  | 0.9                  |
| 7    | P2  | 246       | 14 (235,249)                      | 5.7              | 3.746E-02                               | 2.676E-03                  | 1.0                  |
| 8    | P2  | 257       | 11 (246,257)                      | 4.3              | 3.745E-02                               | 3.405E-03                  | 0.9                  |
| 9    | P2  | 266       | 12 (254,266)                      | 4.5              | 3.680E-02                               | 3.067E-03                  | 0.8                  |
| 10   | P2  | 275       | 12 (263,275)                      | 4.4              | 3.651E-02                               | 3.043E-03                  | 0.8                  |
| 11   | P2  | 285       | 13 (272,285)                      | 4.6              | 3.451E-02                               | 2.655E-03                  | 0.8                  |
| 12   | P3  | 338       | 15 (323,338)                      | 4.4              | 3.228E-02                               | 2.152E-03                  | 0.7                  |
| 13   | P3  | 346       | 12 (334,346)                      | 3.5              | 3.294E-02                               | 2.745E-03                  | 0.7                  |
| 14   | P3  | 358       | 16 (342,358)                      | 4.5              | 3.337E-02                               | 2.086E-03                  | 0.8                  |
| 15   | P3  | 366       | 12 (354,366)                      | 3.3              | 3.287E-02                               | 2.739E-03                  | 0.6                  |
| 16   | P3  | 374       | 12 (362,374)                      | 3.2              | 3.257E-02                               | 2.714E-03                  | 0.7                  |
| 17   | P3  | 383       | 13 (370,383)                      | 3.4              | 3.206E-02                               | 2.466E-03                  | 0.8                  |
| 18   | P3  | 396       | 17 (379,396)                      | 4.3              | 3.184E-02                               | 1.873E-03                  | 0.9                  |
| 19   | P4  | 444       | 10 (434,444)                      | 2.3              | 2.639E-02                               | 2.639E-03                  | 0.8                  |
| 20   | P4  | 454       | 15 (439,454)                      | 3.3              | 2.770E-02                               | 1.847E-03                  | 0.6                  |
| 21   | P4  | 465       | 16 (449,465)                      | 3.4              | 2.759E-02                               | 1.724E-03                  | 0.4                  |
| 22   | P4  | 475       | 15 (460,475)                      | 3.2              | 2.765E-02                               | 1.843E-03                  | 0.4                  |
| 23   | P4  | 486       | 16 (470,486)                      | 3.3              | 2.735E-02                               | 1.709E-03                  | 0.7                  |
| 24   | P4  | 492       | 11 (481,492)                      | 2.2              | 2.650E-02                               | 2.409E-03                  | 0.6                  |
| 25   | P4  | 503       | 17 (486,503)                      | 3.4              | 2.624E-02                               | 1.544E-03                  | 0.4                  |
| 26   | P4  | 515       | 17 (498,515)                      | 3.3              | 2.629E-02                               | 1.546E-03                  | 0.7                  |
| 27   | P5  | 577       | 19 (558,577)                      | 3.3              | 2.404E-02                               | 1.265E-03                  | 0.8                  |
| 28   | P5  | 584       | 14 (570,584)                      | 2.4              | 2.469E-02                               | 1.764E-03                  | 0.3                  |
| 29   | P5  | 597       | 20 (577,597)                      | 3.4              | 2.516E-02                               | 1.258E-03                  | 0.9                  |
| 30   | P5  | 604       | 14 (590,604)                      | 2.3              | 2.482E-02                               | 1.773E-03                  | 0.4                  |
| 31   | P5  | 611       | 21 (597,618)                      | 3.4              | 2.430E-02                               | 1.157E-03                  | 0.8                  |
| 32   | P5  | 625       | 14 (611,625)                      | 2.2              | 2.445E-02                               | 1.746E-03                  | 0.6                  |
| 33   | P5  | 632       | 14 (618,632)                      | 2.2              | 2.390E-02                               | 1.707E-03                  | 0.4                  |
| 34   | P5  | 639       | 21 (625,646)                      | 3.3              | 2.315E-02                               | 1.102E-03                  | 0.9                  |
| 35   | P5  | 654       | 15 (639,654)                      | 2.3              | 2.319E-02                               | 1.546E-03                  | 0.5                  |
| 36   | P6  | 700       | 23 (677,700)                      | 3.3              | 1.930E-02                               | 8.391E-04                  | 0.9                  |
| 37   | P6  | 708       | 16 (692,708)                      | 2.3              | 2.044E-02                               | 1.277E-03                  | 0.7                  |
| 38   | P6  | 716       | 16 (700,716)                      | 2.2              | 2.060E-02                               | 1.288E-03                  | 0.3                  |
| 39   | P6  | 724       | 25 (708,733)                      | 3.5              | 2.088E-02                               | 8.352E-04                  | 0.4                  |
| 40   | P6  | 733       | 25 (716,741)                      | 3.4              | 2.058E-02                               | 8.232E-04                  | 0.6                  |
| 41   | P6  | 741       | 25 (724,749)                      | 3.4              | 2.050E-02                               | 8.200E-04                  | 1.0                  |
| 42   | P6  | 758       | 17 (741,758)                      | 2.2              | 2.022E-02                               | 1.189E-03                  | 0.9                  |
| 43   | P6  | 767       | 18 (749,767)                      | 2.3              | 1.986E-02                               | 1.103E-03                  | 0.6                  |
| 44   | P6  | 775       | 17 (758,775)                      | 2.2              | 1.968E-02                               | 1.158E-03                  | 0.3                  |
| 45   | P7  | 861       | 18 (843,861)                      | 2.1              | 1.706E-02                               | 9.425E-04                  | 0.6                  |
| 46   | P7  | 870       | 19 (851,870)                      | 2.2              | 1.721E-02                               | 9.154E-04                  | 0.6                  |
| 47   | P7  | 879       | 20 (860,879)                      | 2.2              | 1.774E-02                               | 9.097E-04                  | 0.7                  |
| 48   | P7  | 888       | 20 (869,889)                      | 2.3              | 1.750E-02                               | 8.621E-04                  | 0.7                  |
| 49   | P7  | 897       | 21 (878,899)                      | 2.3              | 1.729E-02                               | 8.233E-04                  | 0.9                  |
| 50   | P7  | 906       | 22 (887,909)                      | 2.4              | 1.720E-02                               | 7.926E-04                  | 1.0                  |
| 51   | P7  | 915       | 24 (896,920)                      | 2.6              | 1.690E-02                               | 7.191E-04                  | 1.2                  |
| 52   | P7  | 924       | 24 (906,930)                      | 2.6              | 1.620E-02                               | 6.694E-04                  | 1.0                  |
| 53   | P7  | 933       | 26 (915,941)                      | 2.8              | 1.633E-02                               | 6.305E-04                  | 0.9                  |
| 54   | P8  | 1019      | 24 (998,1023)                     | 2.4              | 1.338E-02                               | 5.552E-04                  | 0.4                  |
| 55   | P8  | 1029      | 24 (1008,1032)                    | 2.4              | 1.424E-02                               | 5.812E-04                  | 0.8                  |
| 56   | P8  | 1038      | 25 (1017,1042)                    | 2.4              | 1.414E-02                               | 5.656E-04                  | 0.9                  |
| 57   | P8  | 1047      | 25 (1026,1051)                    | 2.4              | 1.390E-02                               | 5.494E-04                  | 1.1                  |
| 58   | P8  | 1056      | 26 (1035,1060)                    | 2.4              | 1.402E-02                               | 5.455E-04                  | 0.4                  |
| 59   | P8  | 1066      | 26 (1044,1070)                    | 2.5              | 1.407E-02                               | 5.370E-04                  | 0.6                  |
| 60   | P8  | 1075      | 27 (1053,1080)                    | 2.5              | 1.420E-02                               | 5.338E-04                  | 1.1                  |
| 61   | P8  | 1084      | 27 (1062,1089)                    | 2.5              | 1.370E-02                               | 5.055E-04                  | 1.3                  |

|    |    |      |                |     |           |           |     |
|----|----|------|----------------|-----|-----------|-----------|-----|
| 62 | P8 | 1093 | 27 (1071,1098) | 2.5 | 1.366E-02 | 4.985E-04 | 0.5 |
| 63 | P8 | 1103 | 28 (1080,1108) | 2.5 | 1.326E-02 | 4.770E-04 | 0.7 |
| 64 | P8 | 1112 | 28 (1089,1117) | 2.5 | 1.290E-02 | 4.558E-04 | 1.2 |

Probe B (M75)

Table 13: Energy/Flux Calibration Factors for the Histogram Electron Channels. Histogram LUT ID (M75-B): 25856.

| CH # | PIX | $E$ [keV] | $\Delta E (E_{lo}, E_{hi})$ [keV] | $\Delta E/E$ [%] | $G_0 \Delta E$ [cm <sup>2</sup> sr keV] | $G_0$ [cm <sup>2</sup> sr] | $\Delta G_0/G_0$ [%] |
|------|-----|-----------|-----------------------------------|------------------|-----------------------------------------|----------------------------|----------------------|
| 0    | P1  | 139       | 7 (132,139)                       | 5.0              | 1.960E-02                               | 2.800E-03                  | 1.5                  |
| 1    | P1  | 144       | 6 (138,144)                       | 4.2              | 2.020E-02                               | 3.367E-03                  | 1.4                  |
| 2    | P1  | 149       | 6 (143,149)                       | 4.0              | 2.040E-02                               | 3.400E-03                  | 1.4                  |
| 3    | P1  | 154       | 6 (148,154)                       | 3.9              | 2.040E-02                               | 3.400E-03                  | 1.5                  |
| 4    | P1  | 158       | 7 (151,158)                       | 4.4              | 2.010E-02                               | 2.871E-03                  | 1.4                  |
| 5    | P1  | 163       | 7 (156,163)                       | 4.3              | 2.020E-02                               | 2.886E-03                  | 1.2                  |
| 6    | P1  | 169       | 6 (163,169)                       | 3.6              | 2.010E-02                               | 3.350E-03                  | 1.4                  |
| 7    | P1  | 173       | 8 (165,173)                       | 4.6              | 1.980E-02                               | 2.475E-03                  | 1.2                  |
| 8    | P1  | 177       | 6 (171,177)                       | 3.4              | 1.960E-02                               | 3.267E-03                  | 1.3                  |
| 9    | P1  | 183       | 8 (175,183)                       | 4.4              | 1.900E-02                               | 2.375E-03                  | 1.2                  |
| 10   | P2  | 222       | 7 (215,222)                       | 3.1              | 1.588E-02                               | 2.335E-03                  | 0.9                  |
| 11   | P2  | 227       | 7 (220,227)                       | 3.3              | 1.663E-02                               | 2.247E-03                  | 1.0                  |
| 12   | P2  | 232       | 8 (224,232)                       | 3.4              | 1.700E-02                               | 2.152E-03                  | 1.1                  |
| 13   | P2  | 235       | 6 (228,235)                       | 2.8              | 1.683E-02                               | 2.589E-03                  | 0.9                  |
| 14   | P2  | 240       | 7 (233,240)                       | 3.0              | 1.689E-02                               | 2.379E-03                  | 0.9                  |
| 15   | P2  | 243       | 6 (237,243)                       | 2.3              | 1.690E-02                               | 3.018E-03                  | 1.1                  |
| 16   | P2  | 249       | 7 (242,249)                       | 2.9              | 1.688E-02                               | 2.344E-03                  | 0.9                  |
| 17   | P2  | 254       | 8 (246,254)                       | 3.1              | 1.693E-02                               | 2.171E-03                  | 0.9                  |
| 18   | P2  | 257       | 6 (251,257)                       | 2.5              | 1.659E-02                               | 2.592E-03                  | 0.9                  |
| 19   | P2  | 263       | 8 (255,263)                       | 3.0              | 1.668E-02                               | 2.111E-03                  | 0.8                  |
| 20   | P2  | 266       | 6 (260,266)                       | 2.4              | 1.646E-02                               | 2.532E-03                  | 0.9                  |
| 21   | P2  | 272       | 8 (264,272)                       | 3.0              | 1.654E-02                               | 2.042E-03                  | 0.8                  |
| 22   | P2  | 275       | 7 (268,275)                       | 2.4              | 1.614E-02                               | 2.409E-03                  | 0.8                  |
| 23   | P2  | 282       | 9 (273,282)                       | 3.3              | 1.568E-02                               | 1.704E-03                  | 0.8                  |
| 24   | P3  | 323       | 9 (314,323)                       | 2.8              | 1.336E-02                               | 1.452E-03                  | 0.7                  |
| 25   | P3  | 327       | 9 (318,327)                       | 2.6              | 1.381E-02                               | 1.606E-03                  | 0.8                  |
| 26   | P3  | 330       | 8 (322,330)                       | 2.4              | 1.426E-02                               | 1.783E-03                  | 0.8                  |
| 27   | P3  | 338       | 11 (327,338)                      | 3.4              | 1.453E-02                               | 1.275E-03                  | 0.9                  |
| 28   | P3  | 342       | 11 (331,342)                      | 3.2              | 1.472E-02                               | 1.326E-03                  | 0.7                  |
| 29   | P3  | 346       | 11 (335,346)                      | 3.1              | 1.463E-02                               | 1.355E-03                  | 0.6                  |
| 30   | P3  | 350       | 10 (340,350)                      | 3.0              | 1.458E-02                               | 1.389E-03                  | 0.6                  |
| 31   | P3  | 354       | 10 (344,354)                      | 2.8              | 1.447E-02                               | 1.462E-03                  | 0.6                  |
| 32   | P3  | 358       | 10 (348,358)                      | 2.8              | 1.426E-02                               | 1.440E-03                  | 0.6                  |
| 33   | P3  | 362       | 10 (352,362)                      | 2.7              | 1.432E-02                               | 1.476E-03                  | 0.6                  |
| 34   | P3  | 366       | 9 (357,366)                       | 2.6              | 1.411E-02                               | 1.501E-03                  | 0.6                  |
| 35   | P3  | 370       | 9 (361,370)                       | 2.5              | 1.414E-02                               | 1.554E-03                  | 0.7                  |
| 36   | P3  | 374       | 9 (365,374)                       | 2.4              | 1.417E-02                               | 1.610E-03                  | 0.6                  |
| 37   | P3  | 379       | 10 (370,379)                      | 2.5              | 1.408E-02                               | 1.482E-03                  | 0.6                  |
| 38   | P3  | 383       | 9 (374,383)                       | 2.4              | 1.387E-02                               | 1.491E-03                  | 0.7                  |
| 39   | P3  | 387       | 9 (378,387)                       | 2.3              | 1.352E-02                               | 1.502E-03                  | 0.7                  |
| 40   | P4  | 442       | 10 (432,442)                      | 2.3              | 1.248E-02                               | 1.236E-03                  | 0.7                  |
| 41   | P4  | 447       | 10 (436,447)                      | 2.3              | 1.277E-02                               | 1.228E-03                  | 0.8                  |
| 42   | P4  | 452       | 11 (441,452)                      | 2.4              | 1.298E-02                               | 1.213E-03                  | 0.8                  |
| 43   | P4  | 456       | 11 (445,456)                      | 2.4              | 1.315E-02                               | 1.206E-03                  | 0.7                  |
| 44   | P4  | 460       | 11 (449,460)                      | 2.4              | 1.333E-02                               | 1.190E-03                  | 0.5                  |
| 45   | P4  | 465       | 11 (454,465)                      | 2.5              | 1.314E-02                               | 1.153E-03                  | 0.4                  |
| 46   | P4  | 470       | 12 (458,470)                      | 2.5              | 1.320E-02                               | 1.128E-03                  | 0.4                  |
| 47   | P4  | 474       | 12 (462,474)                      | 2.5              | 1.326E-02                               | 1.105E-03                  | 0.6                  |
| 48   | P4  | 479       | 12 (466,479)                      | 2.5              | 1.314E-02                               | 1.077E-03                  | 0.7                  |
| 49   | P4  | 483       | 12 (471,483)                      | 2.6              | 1.286E-02                               | 1.029E-03                  | 0.6                  |
| 50   | P4  | 488       | 13 (475,488)                      | 2.6              | 1.281E-02                               | 1.009E-03                  | 0.6                  |
| 51   | P4  | 492       | 13 (479,492)                      | 2.6              | 1.266E-02                               | 9.814E-04                  | 0.4                  |
| 52   | P4  | 497       | 13 (483,497)                      | 2.7              | 1.278E-02                               | 9.609E-04                  | 0.5                  |
| 53   | P4  | 501       | 14 (488,501)                      | 2.7              | 1.265E-02                               | 9.370E-04                  | 0.7                  |
| 54   | P4  | 506       | 14 (492,506)                      | 2.7              | 1.231E-02                               | 8.920E-04                  | 0.6                  |
| 55   | P4  | 510       | 14 (496,510)                      | 2.7              | 1.260E-02                               | 9.000E-04                  | 0.5                  |
| 56   | P4  | 515       | 14 (500,515)                      | 2.8              | 1.230E-02                               | 8.662E-04                  | 0.4                  |
| 57   | P4  | 519       | 15 (505,519)                      | 2.8              | 1.205E-02                               | 8.310E-04                  | 0.6                  |
| 58   | P5  | 577       | 19 (558,577)                      | 3.3              | 2.142E-02                               | 1.127E-03                  | 0.7                  |
| 59   | P5  | 584       | 14 (570,584)                      | 2.4              | 2.187E-02                               | 1.562E-03                  | 0.4                  |
| 60   | P5  | 590       | 13 (577,590)                      | 2.2              | 2.215E-02                               | 1.704E-03                  | 0.7                  |
| 61   | P5  | 604       | 20 (584,604)                      | 3.3              | 2.207E-02                               | 1.103E-03                  | 0.8                  |

|    |    |      |                |     |           |           |     |
|----|----|------|----------------|-----|-----------|-----------|-----|
| 62 | P5 | 611  | 14 (597,611)   | 2.3 | 2.181E-02 | 1.558E-03 | 0.5 |
| 63 | P5 | 618  | 14 (604,618)   | 2.3 | 2.187E-02 | 1.562E-03 | 0.3 |
| 64 | P5 | 625  | 21 (611,632)   | 3.4 | 2.138E-02 | 1.018E-03 | 0.7 |
| 65 | P5 | 632  | 21 (618,639)   | 3.3 | 2.098E-02 | 9.990E-04 | 0.9 |
| 66 | P5 | 646  | 14 (632,646)   | 2.2 | 2.091E-02 | 1.494E-03 | 0.7 |
| 67 | P5 | 654  | 15 (639,654)   | 2.3 | 2.041E-02 | 1.361E-03 | 0.4 |
| 68 | P6 | 708  | 16 (692,708)   | 2.3 | 1.859E-02 | 1.162E-03 | 0.3 |
| 69 | P6 | 716  | 16 (700,716)   | 2.2 | 1.904E-02 | 1.190E-03 | 0.4 |
| 70 | P6 | 724  | 25 (708,733)   | 3.5 | 1.966E-02 | 7.864E-04 | 0.5 |
| 71 | P6 | 733  | 25 (716,741)   | 3.4 | 1.946E-02 | 7.784E-04 | 0.6 |
| 72 | P6 | 741  | 25 (724,749)   | 3.4 | 1.940E-02 | 7.760E-04 | 0.9 |
| 73 | P6 | 749  | 17 (741,758)   | 2.3 | 1.920E-02 | 1.129E-03 | 1.0 |
| 74 | P6 | 767  | 18 (749,767)   | 2.3 | 1.935E-02 | 1.075E-03 | 0.9 |
| 75 | P6 | 775  | 17 (758,775)   | 2.2 | 1.884E-02 | 1.108E-03 | 0.8 |
| 76 | P6 | 784  | 17 (767,784)   | 2.2 | 1.892E-02 | 1.113E-03 | 0.8 |
| 77 | P6 | 793  | 18 (775,793)   | 2.3 | 1.809E-02 | 1.005E-03 | 0.7 |
| 78 | P7 | 869  | 22 (849,871)   | 2.5 | 1.566E-02 | 7.151E-04 | 0.5 |
| 79 | P7 | 878  | 22 (858,880)   | 2.5 | 1.639E-02 | 7.383E-04 | 0.7 |
| 80 | P7 | 887  | 23 (867,889)   | 2.5 | 1.628E-02 | 7.204E-04 | 0.8 |
| 81 | P7 | 895  | 23 (875,898)   | 2.6 | 1.620E-02 | 7.013E-04 | 1.1 |
| 82 | P7 | 904  | 23 (884,907)   | 2.6 | 1.590E-02 | 6.795E-04 | 1.0 |
| 83 | P7 | 913  | 24 (892,916)   | 2.6 | 1.602E-02 | 6.731E-04 | 0.8 |
| 84 | P7 | 922  | 24 (901,925)   | 2.6 | 1.597E-02 | 6.627E-04 | 0.5 |
| 85 | P7 | 931  | 25 (910,934)   | 2.6 | 1.557E-02 | 6.329E-04 | 0.4 |
| 86 | P7 | 940  | 25 (918,943)   | 2.7 | 1.537E-02 | 6.148E-04 | 0.7 |
| 87 | P7 | 948  | 25 (927,952)   | 2.7 | 1.537E-02 | 6.075E-04 | 0.8 |
| 88 | P8 | 1020 | 28 (999,1028)  | 2.8 | 1.282E-02 | 4.546E-04 | 0.7 |
| 89 | P8 | 1029 | 28 (1008,1036) | 2.7 | 1.342E-02 | 4.776E-04 | 0.6 |
| 90 | P8 | 1038 | 28 (1016,1044) | 2.7 | 1.325E-02 | 4.749E-04 | 0.8 |
| 91 | P8 | 1047 | 28 (1025,1053) | 2.7 | 1.300E-02 | 4.676E-04 | 1.2 |
| 92 | P8 | 1056 | 28 (1034,1061) | 2.6 | 1.320E-02 | 4.783E-04 | 0.4 |
| 93 | P8 | 1065 | 27 (1042,1070) | 2.6 | 1.319E-02 | 4.814E-04 | 0.8 |
| 94 | P8 | 1074 | 27 (1051,1078) | 2.5 | 1.340E-02 | 4.926E-04 | 1.1 |
| 95 | P8 | 1083 | 27 (1059,1086) | 2.5 | 1.298E-02 | 4.790E-04 | 0.8 |
| 96 | P8 | 1092 | 27 (1068,1095) | 2.5 | 1.290E-02 | 4.796E-04 | 0.5 |
| 97 | P8 | 1101 | 27 (1076,1103) | 2.4 | 1.290E-02 | 4.813E-04 | 1.3 |

Table 14: Energy/Flux Calibration Factors for the Histogram Electron Channels. Histogram LUT ID (M75-B): 26880.

| CH # | PIX | $E$ [keV] | $\Delta E (E_{lo}, E_{hi})$ [keV] | $\Delta E/E$ [%] | $G_0 \Delta E$ [cm <sup>2</sup> sr keV] | $G_0$ [cm <sup>2</sup> sr] | $\Delta G_0/G_0$ [%] |
|------|-----|-----------|-----------------------------------|------------------|-----------------------------------------|----------------------------|----------------------|
| 0    | P1  | 136       | 11 (127,138)                      | 8.1              | 3.740E-02                               | 3.400E-03                  | 1.7                  |
| 1    | P1  | 146       | 11 (136,147)                      | 7.5              | 4.030E-02                               | 3.664E-03                  | 1.4                  |
| 2    | P1  | 156       | 12 (146,158)                      | 7.7              | 4.050E-02                               | 3.375E-03                  | 1.3                  |
| 3    | P1  | 165       | 11 (156,167)                      | 6.7              | 4.000E-02                               | 3.636E-03                  | 1.3                  |
| 4    | P1  | 175       | 12 (165,177)                      | 6.9              | 3.940E-02                               | 3.283E-03                  | 1.2                  |
| 5    | P2  | 224       | 10 (214,224)                      | 4.5              | 3.247E-02                               | 3.247E-03                  | 0.9                  |
| 6    | P2  | 232       | 13 (222,235)                      | 5.6              | 3.360E-02                               | 2.585E-03                  | 1.0                  |
| 7    | P2  | 243       | 11 (232,243)                      | 4.4              | 3.406E-02                               | 3.154E-03                  | 1.0                  |
| 8    | P2  | 251       | 11 (240,251)                      | 4.4              | 3.381E-02                               | 3.074E-03                  | 0.8                  |
| 9    | P2  | 260       | 11 (249,260)                      | 4.2              | 3.328E-02                               | 3.025E-03                  | 0.8                  |
| 10   | P2  | 269       | 12 (257,269)                      | 4.5              | 3.301E-02                               | 2.751E-03                  | 0.7                  |
| 11   | P2  | 279       | 13 (266,279)                      | 4.7              | 3.182E-02                               | 2.448E-03                  | 0.7                  |
| 12   | P3  | 330       | 15 (316,330)                      | 4.4              | 2.833E-02                               | 1.927E-03                  | 0.6                  |
| 13   | P3  | 338       | 11 (327,338)                      | 3.3              | 2.906E-02                               | 2.572E-03                  | 0.6                  |
| 14   | P3  | 346       | 12 (334,346)                      | 3.5              | 2.890E-02                               | 2.408E-03                  | 0.8                  |
| 15   | P3  | 358       | 16 (342,358)                      | 4.5              | 2.892E-02                               | 1.808E-03                  | 0.8                  |
| 16   | P3  | 366       | 12 (354,366)                      | 3.3              | 2.867E-02                               | 2.389E-03                  | 0.7                  |
| 17   | P3  | 374       | 12 (362,374)                      | 3.2              | 2.855E-02                               | 2.379E-03                  | 0.6                  |
| 18   | P3  | 383       | 13 (370,383)                      | 3.4              | 2.820E-02                               | 2.169E-03                  | 0.6                  |
| 19   | P3  | 392       | 13 (379,392)                      | 3.3              | 2.688E-02                               | 2.068E-03                  | 0.6                  |
| 20   | P4  | 444       | 15 (429,444)                      | 3.4              | 2.508E-02                               | 1.672E-03                  | 0.5                  |
| 21   | P4  | 454       | 15 (439,454)                      | 3.3              | 2.639E-02                               | 1.759E-03                  | 0.4                  |
| 22   | P4  | 465       | 16 (449,465)                      | 3.4              | 2.667E-02                               | 1.667E-03                  | 0.7                  |
| 23   | P4  | 470       | 10 (460,470)                      | 2.1              | 2.622E-02                               | 2.622E-03                  | 0.6                  |

|    |    |      |                |     |           |           |     |
|----|----|------|----------------|-----|-----------|-----------|-----|
| 24 | P4 | 481  | 16 (465,481)   | 3.3 | 2.603E-02 | 1.627E-03 | 0.4 |
| 25 | P4 | 492  | 17 (475,492)   | 3.5 | 2.568E-02 | 1.511E-03 | 0.6 |
| 26 | P4 | 498  | 12 (486,498)   | 2.4 | 2.521E-02 | 2.101E-03 | 0.5 |
| 27 | P4 | 509  | 17 (492,509)   | 3.3 | 2.513E-02 | 1.478E-03 | 0.5 |
| 28 | P4 | 515  | 12 (503,515)   | 2.3 | 2.413E-02 | 2.011E-03 | 0.7 |
| 29 | P5 | 577  | 19 (558,577)   | 3.3 | 2.142E-02 | 1.127E-03 | 0.7 |
| 30 | P5 | 584  | 14 (570,584)   | 2.4 | 2.187E-02 | 1.562E-03 | 0.4 |
| 31 | P5 | 590  | 13 (577,590)   | 2.2 | 2.215E-02 | 1.704E-03 | 0.7 |
| 32 | P5 | 604  | 20 (584,604)   | 3.3 | 2.207E-02 | 1.103E-03 | 0.8 |
| 33 | P5 | 611  | 14 (597,611)   | 2.3 | 2.181E-02 | 1.558E-03 | 0.5 |
| 34 | P5 | 618  | 14 (604,618)   | 2.3 | 2.187E-02 | 1.562E-03 | 0.3 |
| 35 | P5 | 625  | 21 (611,632)   | 3.4 | 2.138E-02 | 1.018E-03 | 0.7 |
| 36 | P5 | 632  | 21 (618,639)   | 3.3 | 2.098E-02 | 9.990E-04 | 0.9 |
| 37 | P5 | 646  | 14 (632,646)   | 2.2 | 2.091E-02 | 1.494E-03 | 0.7 |
| 38 | P5 | 654  | 15 (639,654)   | 2.3 | 2.041E-02 | 1.361E-03 | 0.4 |
| 39 | P6 | 708  | 16 (692,708)   | 2.3 | 1.859E-02 | 1.162E-03 | 0.3 |
| 40 | P6 | 716  | 16 (700,716)   | 2.2 | 1.904E-02 | 1.190E-03 | 0.4 |
| 41 | P6 | 724  | 25 (708,733)   | 3.5 | 1.966E-02 | 7.864E-04 | 0.5 |
| 42 | P6 | 733  | 25 (716,741)   | 3.4 | 1.946E-02 | 7.784E-04 | 0.6 |
| 43 | P6 | 741  | 25 (724,749)   | 3.4 | 1.940E-02 | 7.760E-04 | 0.9 |
| 44 | P6 | 749  | 17 (741,758)   | 2.3 | 1.920E-02 | 1.129E-03 | 1.0 |
| 45 | P6 | 767  | 18 (749,767)   | 2.3 | 1.935E-02 | 1.075E-03 | 0.9 |
| 46 | P6 | 775  | 17 (758,775)   | 2.2 | 1.884E-02 | 1.108E-03 | 0.8 |
| 47 | P6 | 784  | 17 (767,784)   | 2.2 | 1.892E-02 | 1.113E-03 | 0.8 |
| 48 | P6 | 793  | 18 (775,793)   | 2.3 | 1.809E-02 | 1.005E-03 | 0.7 |
| 49 | P7 | 861  | 26 (841,868)   | 3.1 | 1.500E-02 | 5.660E-04 | 1.1 |
| 50 | P7 | 870  | 26 (851,877)   | 3.0 | 1.583E-02 | 6.088E-04 | 0.8 |
| 51 | P7 | 880  | 26 (860,885)   | 2.9 | 1.621E-02 | 6.332E-04 | 0.6 |
| 52 | P7 | 889  | 25 (869,894)   | 2.8 | 1.612E-02 | 6.422E-04 | 0.4 |
| 53 | P7 | 898  | 25 (878,903)   | 2.7 | 1.600E-02 | 6.504E-04 | 0.4 |
| 54 | P7 | 907  | 24 (888,912)   | 2.7 | 1.624E-02 | 6.711E-04 | 0.6 |
| 55 | P7 | 916  | 24 (897,920)   | 2.6 | 1.605E-02 | 6.772E-04 | 0.7 |
| 56 | P7 | 925  | 23 (906,929)   | 2.5 | 1.580E-02 | 6.781E-04 | 1.1 |
| 57 | P7 | 934  | 23 (915,938)   | 2.4 | 1.560E-02 | 6.842E-04 | 1.1 |
| 58 | P7 | 944  | 22 (924,947)   | 2.4 | 1.503E-02 | 6.710E-04 | 0.7 |
| 59 | P7 | 953  | 22 (934,956)   | 2.3 | 1.495E-02 | 6.858E-04 | 0.4 |
| 60 | P8 | 1020 | 28 (999,1028)  | 2.8 | 1.282E-02 | 4.546E-04 | 0.7 |
| 61 | P8 | 1029 | 28 (1008,1036) | 2.7 | 1.342E-02 | 4.776E-04 | 0.6 |
| 62 | P8 | 1038 | 28 (1016,1044) | 2.7 | 1.325E-02 | 4.749E-04 | 0.8 |
| 63 | P8 | 1047 | 28 (1025,1053) | 2.7 | 1.300E-02 | 4.676E-04 | 1.2 |
| 64 | P8 | 1056 | 28 (1034,1061) | 2.6 | 1.320E-02 | 4.783E-04 | 0.4 |
| 65 | P8 | 1065 | 27 (1042,1070) | 2.6 | 1.319E-02 | 4.814E-04 | 0.8 |
| 66 | P8 | 1074 | 27 (1051,1078) | 2.5 | 1.340E-02 | 4.926E-04 | 1.1 |
| 67 | P8 | 1083 | 27 (1059,1086) | 2.5 | 1.298E-02 | 4.790E-04 | 0.8 |
| 68 | P8 | 1092 | 27 (1068,1095) | 2.5 | 1.290E-02 | 4.796E-04 | 0.5 |
| 69 | P8 | 1101 | 27 (1076,1103) | 2.4 | 1.290E-02 | 4.813E-04 | 1.3 |

Probe B (HIGH)

Table 15: Energy/Flux Calibration Factors for the Histogram Electron Channels. Histogram LUT ID (HIGH-B): 31490, for times between 2012/09/01 and 2013/08/03.

| CH # | PIX | $E$<br>[keV] | $\Delta E (E_{lo}, E_{hi})$<br>[keV] | $\Delta E/E$<br>[%] | $G_0 \Delta E$<br>[cm <sup>2</sup> sr keV] | $G_0$<br>[cm <sup>2</sup> sr] | $\Delta G_0/G_0$<br>[%] |
|------|-----|--------------|--------------------------------------|---------------------|--------------------------------------------|-------------------------------|-------------------------|
| 0    | P0  | 970          | 108 (884,992)                        | 11.1                | 2.960E-01                                  | 2.741E-03                     | 2.4                     |
| 1    | P0  | 992          | 90 (926,1016)                        | 9.1                 | 3.120E-01                                  | 3.467E-03                     | 3.1                     |
| 2    | P0  | 1039         | 91 (948,1039)                        | 8.8                 | 3.750E-01                                  | 4.121E-03                     | 1.9                     |
| 3    | P0  | 1064         | 96 (992,1088)                        | 9.0                 | 3.620E-01                                  | 3.771E-03                     | 2.2                     |
| 4    | P0  | 1114         | 75 (1039,1114)                       | 6.7                 | 4.020E-01                                  | 5.360E-03                     | 1.9                     |
| 5    | P0  | 1140         | 103 (1064,1167)                      | 9.0                 | 3.790E-01                                  | 3.680E-03                     | 1.3                     |
| 6    | P0  | 1194         | 108 (1114,1222)                      | 9.0                 | 3.860E-01                                  | 3.574E-03                     | 2.2                     |
| 7    | P0  | 1222         | 110 (1140,1250)                      | 9.0                 | 3.353E-01                                  | 3.048E-03                     | 0.9                     |
| 8    | P0  | 1250         | 85 (1194,1279)                       | 6.8                 | 2.860E-01                                  | 3.365E-03                     | 2.3                     |
| 9    | P1  | 1579         | 139 (1440,1579)                      | 8.8                 | 3.240E-01                                  | 2.331E-03                     | 1.4                     |
| 10   | P1  | 1611         | 108 (1504,1612)                      | 6.7                 | 3.630E-01                                  | 3.361E-03                     | 1.4                     |
| 11   | P1  | 1642         | 111 (1539,1650)                      | 6.8                 | 3.980E-01                                  | 3.586E-03                     | 1.9                     |
| 12   | P1  | 1674         | 113 (1575,1688)                      | 6.8                 | 4.150E-01                                  | 3.673E-03                     | 2.2                     |
| 13   | P1  | 1706         | 116 (1612,1728)                      | 6.8                 | 3.610E-01                                  | 3.112E-03                     | 2.1                     |
| 14   | P1  | 1737         | 118 (1650,1768)                      | 6.8                 | 3.520E-01                                  | 2.983E-03                     | 1.8                     |
| 15   | P1  | 1769         | 121 (1688,1809)                      | 6.8                 | 3.230E-01                                  | 2.669E-03                     | 1.3                     |
| 16   | P1  | 1800         | 124 (1728,1852)                      | 6.9                 | 2.910E-01                                  | 2.347E-03                     | 1.2                     |
| 17   | P2  | 2404         | 214 (2194,2408)                      | 8.9                 | 8.510E-02                                  | 3.969E-04                     | 2.5                     |
| 18   | P2  | 2442         | 213 (2236,2448)                      | 8.7                 | 9.000E-02                                  | 4.225E-04                     | 1.7                     |
| 19   | P2  | 2480         | 212 (2277,2489)                      | 8.5                 | 9.970E-02                                  | 4.707E-04                     | 2.6                     |
| 20   | P2  | 2517         | 210 (2318,2529)                      | 8.4                 | 9.300E-02                                  | 4.418E-04                     | 1.7                     |
| 21   | P2  | 2555         | 209 (2360,2569)                      | 8.2                 | 1.000E-01                                  | 4.782E-04                     | 1.9                     |
| 22   | P2  | 2593         | 208 (2401,2609)                      | 8.0                 | 9.790E-02                                  | 4.709E-04                     | 2.3                     |
| 23   | P2  | 2630         | 207 (2443,2649)                      | 7.9                 | 9.410E-02                                  | 4.555E-04                     | 1.6                     |
| 24   | P2  | 2668         | 205 (2484,2690)                      | 7.7                 | 1.120E-01                                  | 5.455E-04                     | 1.9                     |
| 25   | P2  | 2706         | 204 (2526,2730)                      | 7.5                 | 8.850E-02                                  | 4.338E-04                     | 2.0                     |
| 26   | P2  | 2744         | 203 (2567,2770)                      | 7.4                 | 8.810E-02                                  | 4.344E-04                     | 2.0                     |
| 27   | P2  | 2782         | 202 (2609,2810)                      | 7.2                 | 9.130E-02                                  | 4.531E-04                     | 2.0                     |
| 28   | P2  | 2819         | 200 (2650,2850)                      | 7.1                 | 8.530E-02                                  | 4.263E-04                     | 2.5                     |
| 29   | P2  | 2857         | 199 (2692,2890)                      | 7.0                 | 8.680E-02                                  | 4.364E-04                     | 1.7                     |
| 30   | P2  | 2895         | 198 (2733,2931)                      | 6.8                 | 7.460E-02                                  | 3.775E-04                     | 2.9                     |
| 31   | P2  | 2933         | 196 (2774,2971)                      | 6.7                 | 8.170E-02                                  | 4.162E-04                     | 1.7                     |
| 32   | P3  | 3717         | 460 (3393,3853)                      | 12.4                | 7.090E-02                                  | 1.542E-04                     | 5.1                     |
| 33   | P3  | 3756         | 449 (3437,3886)                      | 12.0                | 8.440E-02                                  | 1.879E-04                     | 5.0                     |
| 34   | P3  | 3795         | 438 (3480,3918)                      | 11.6                | 8.360E-02                                  | 1.907E-04                     | 4.4                     |
| 35   | P3  | 3834         | 427 (3524,3951)                      | 11.1                | 7.580E-02                                  | 1.774E-04                     | 5.0                     |
| 36   | P3  | 3873         | 417 (3567,3984)                      | 10.8                | 8.790E-02                                  | 2.110E-04                     | 5.2                     |
| 37   | P3  | 3912         | 406 (3610,4016)                      | 10.4                | 7.910E-02                                  | 1.949E-04                     | 4.3                     |
| 38   | P3  | 3951         | 395 (3654,4049)                      | 10.0                | 9.380E-02                                  | 2.375E-04                     | 4.8                     |
| 39   | P3  | 3990         | 384 (3697,4081)                      | 9.6                 | 9.440E-02                                  | 2.458E-04                     | 3.6                     |
| 40   | P3  | 4028         | 373 (3740,4114)                      | 9.3                 | 9.080E-02                                  | 2.432E-04                     | 3.8                     |
| 41   | P3  | 4068         | 362 (3784,4146)                      | 8.9                 | 8.240E-02                                  | 2.273E-04                     | 3.8                     |
| 42   | P3  | 4106         | 352 (3827,4179)                      | 8.6                 | 8.070E-02                                  | 2.295E-04                     | 4.0                     |
| 43   | P3  | 4146         | 341 (3870,4211)                      | 8.2                 | 8.720E-02                                  | 2.559E-04                     | 4.0                     |
| 44   | P3  | 4184         | 330 (3914,4244)                      | 7.9                 | 7.720E-02                                  | 2.339E-04                     | 4.1                     |
| 45   | P3  | 4224         | 319 (3957,4276)                      | 7.6                 | 8.640E-02                                  | 2.708E-04                     | 4.8                     |
| 46   | P3  | 4262         | 308 (4000,4309)                      | 7.2                 | 8.360E-02                                  | 2.712E-04                     | 3.5                     |
| 47   | P3  | 4302         | 297 (4044,4341)                      | 6.9                 | 7.850E-02                                  | 2.639E-04                     | 4.8                     |
| 48   | P3  | 4340         | 287 (4087,4374)                      | 6.6                 | 8.210E-02                                  | 2.865E-04                     | 3.7                     |
| 49   | P3  | 4380         | 276 (4131,4406)                      | 6.3                 | 6.880E-02                                  | 2.495E-04                     | 5.4                     |
| 50   | P3  | 4418         | 265 (4174,4439)                      | 6.0                 | 7.140E-02                                  | 2.694E-04                     | 3.6                     |

Table 16: Energy/Flux Calibration Factors for the Histogram Electron Channels. Histogram LUT ID (HIGH-B): 31490, for times between 2013/08/03 and 2019/07/16.

| CH # | PIX | $E$<br>[keV] | $\Delta E (E_{lo}, E_{hi})$<br>[keV] | $\Delta E/E$<br>[%] | $G_0 \Delta E$<br>[cm <sup>2</sup> sr keV] | $G_0$<br>[cm <sup>2</sup> sr] | $\Delta G_0/G_0$<br>[%] |
|------|-----|--------------|--------------------------------------|---------------------|--------------------------------------------|-------------------------------|-------------------------|
|------|-----|--------------|--------------------------------------|---------------------|--------------------------------------------|-------------------------------|-------------------------|



|    |    |      |                 |      |           |           |     |
|----|----|------|-----------------|------|-----------|-----------|-----|
| 0  | P0 | 970  | 108 (884,992)   | 11.1 | 2.970E-01 | 2.750E-03 | 2.4 |
| 1  | P0 | 992  | 90 (926,1016)   | 9.1  | 3.130E-01 | 3.478E-03 | 3.1 |
| 2  | P0 | 1039 | 91 (948,1039)   | 8.8  | 3.770E-01 | 4.143E-03 | 1.9 |
| 3  | P0 | 1064 | 96 (992,1088)   | 9.0  | 3.640E-01 | 3.792E-03 | 2.2 |
| 4  | P0 | 1114 | 75 (1039,1114)  | 6.7  | 4.040E-01 | 5.387E-03 | 1.9 |
| 5  | P0 | 1140 | 103 (1064,1167) | 9.0  | 3.820E-01 | 3.709E-03 | 1.3 |
| 6  | P0 | 1194 | 108 (1114,1222) | 9.0  | 3.890E-01 | 3.602E-03 | 2.2 |
| 7  | P0 | 1222 | 110 (1140,1250) | 9.0  | 3.389E-01 | 3.081E-03 | 0.9 |
| 8  | P0 | 1250 | 85 (1194,1279)  | 6.8  | 2.880E-01 | 3.388E-03 | 2.2 |
| 9  | P1 | 1579 | 139 (1440,1579) | 8.8  | 3.240E-01 | 2.331E-03 | 1.4 |
| 10 | P1 | 1611 | 108 (1504,1612) | 6.7  | 3.630E-01 | 3.361E-03 | 1.4 |
| 11 | P1 | 1642 | 111 (1539,1650) | 6.8  | 3.980E-01 | 3.586E-03 | 1.9 |
| 12 | P1 | 1674 | 113 (1575,1688) | 6.8  | 4.150E-01 | 3.673E-03 | 2.2 |
| 13 | P1 | 1706 | 116 (1612,1728) | 6.8  | 3.610E-01 | 3.112E-03 | 2.1 |
| 14 | P1 | 1737 | 118 (1650,1768) | 6.8  | 3.520E-01 | 2.983E-03 | 1.8 |
| 15 | P1 | 1769 | 121 (1688,1809) | 6.8  | 3.230E-01 | 2.669E-03 | 1.3 |
| 16 | P1 | 1800 | 124 (1728,1852) | 6.9  | 2.910E-01 | 2.347E-03 | 1.2 |
| 17 | P2 | 2267 | 165 (2103,2267) | 7.3  | 2.560E-01 | 1.554E-03 | 1.6 |
| 18 | P2 | 2308 | 164 (2144,2308) | 7.1  | 3.060E-01 | 1.872E-03 | 1.6 |
| 19 | P2 | 2348 | 162 (2186,2348) | 6.9  | 2.930E-01 | 1.805E-03 | 2.1 |
| 20 | P2 | 2389 | 161 (2228,2389) | 6.7  | 3.240E-01 | 2.010E-03 | 1.2 |
| 21 | P2 | 2429 | 160 (2269,2429) | 6.6  | 3.580E-01 | 2.236E-03 | 1.5 |
| 22 | P2 | 2470 | 159 (2312,2470) | 6.4  | 3.310E-01 | 2.083E-03 | 2.3 |
| 23 | P2 | 2510 | 158 (2354,2512) | 6.3  | 3.640E-01 | 2.308E-03 | 1.1 |
| 24 | P2 | 2550 | 157 (2397,2553) | 6.1  | 3.570E-01 | 2.280E-03 | 1.3 |
| 25 | P2 | 2591 | 155 (2439,2595) | 6.0  | 3.380E-01 | 2.175E-03 | 2.4 |
| 26 | P2 | 2631 | 154 (2482,2636) | 5.9  | 3.420E-01 | 2.216E-03 | 1.2 |
| 27 | P2 | 2672 | 153 (2524,2677) | 5.7  | 3.530E-01 | 2.307E-03 | 1.3 |
| 28 | P2 | 2712 | 152 (2567,2719) | 5.6  | 3.560E-01 | 2.344E-03 | 2.4 |
| 29 | P2 | 2752 | 151 (2610,2760) | 5.5  | 3.040E-01 | 2.017E-03 | 1.6 |
| 30 | P2 | 2793 | 150 (2652,2802) | 5.4  | 3.140E-01 | 2.099E-03 | 1.3 |
| 31 | P2 | 2833 | 148 (2695,2843) | 5.2  | 2.790E-01 | 1.880E-03 | 2.4 |
| 32 | P2 | 2874 | 147 (2737,2884) | 5.1  | 2.760E-01 | 1.875E-03 | 1.2 |
| 33 | P2 | 2914 | 146 (2780,2926) | 5.0  | 2.750E-01 | 1.882E-03 | 2.0 |
| 34 | P3 | 3572 | 250 (3348,3597) | 7.0  | 2.750E-01 | 1.102E-03 | 3.4 |
| 35 | P3 | 3616 | 248 (3390,3639) | 6.9  | 2.890E-01 | 1.163E-03 | 3.3 |
| 36 | P3 | 3659 | 247 (3433,3680) | 6.8  | 3.450E-01 | 1.395E-03 | 3.9 |
| 37 | P3 | 3702 | 246 (3476,3722) | 6.6  | 3.240E-01 | 1.317E-03 | 2.8 |
| 38 | P3 | 3745 | 245 (3518,3763) | 6.5  | 3.110E-01 | 1.270E-03 | 4.3 |
| 39 | P3 | 3788 | 244 (3561,3804) | 6.4  | 3.700E-01 | 1.518E-03 | 2.6 |
| 40 | P3 | 3832 | 242 (3604,3846) | 6.3  | 3.290E-01 | 1.357E-03 | 4.2 |
| 41 | P3 | 3875 | 241 (3646,3888) | 6.2  | 3.910E-01 | 1.620E-03 | 2.7 |
| 42 | P3 | 3918 | 240 (3689,3929) | 6.1  | 3.510E-01 | 1.462E-03 | 3.6 |
| 43 | P3 | 3962 | 239 (3731,3970) | 6.0  | 3.770E-01 | 1.577E-03 | 2.9 |
| 44 | P3 | 4005 | 238 (3774,4012) | 5.9  | 3.230E-01 | 1.358E-03 | 3.7 |
| 45 | P3 | 4048 | 237 (3817,4053) | 5.8  | 3.770E-01 | 1.593E-03 | 3.2 |
| 46 | P3 | 4091 | 235 (3859,4095) | 5.8  | 3.420E-01 | 1.453E-03 | 2.9 |
| 47 | P3 | 4134 | 234 (3902,4136) | 5.7  | 3.500E-01 | 1.494E-03 | 2.9 |
| 48 | P3 | 4178 | 233 (3945,4178) | 5.6  | 3.100E-01 | 1.330E-03 | 3.4 |
| 49 | P3 | 4221 | 232 (3989,4221) | 5.5  | 3.340E-01 | 1.441E-03 | 3.8 |
| 50 | P3 | 4264 | 231 (4034,4264) | 5.4  | 3.030E-01 | 1.314E-03 | 2.4 |
| 51 | P3 | 4308 | 230 (4078,4308) | 5.3  | 3.160E-01 | 1.377E-03 | 4.6 |
