# Supplementary material for: The Magnetic Electron Ion Spectrometer: A Review of On-Orbit Sensor Performance, Data, Operations, and Science
Source: PubMed Central journal article supplement (PMC8553741; doi:10.1007/s11214-021-00855-2), 2021-10-28
Supplement: 11214_2021_855_MOESM5_ESM.pdf [file 11214_2021_855_MOESM5_ESM.pdf]

# MagEIS Calibration Factors: Ion Main Rates

June 18, 2021

Table 1 through Table 5 provide energy channel definitions and flux conversion factors for the main rate proton channels on both Probes. Note the valid time ranges indicated in the table captions.

Table 1: Energy/Flux Calibration Factors for the Proton Channels on Probe A. Valid from 06 Sep 2012 00:00:00 to 23 Dec 2012 00:00:00. Main rate LUTID: 29952. Note that channel 20 should be considered invalid (it has PHA 255 junk bin included).

| Chan<br># | $E$<br>[keV] | $\Delta E (E_{lo}, E_{hi})$<br>[keV] | $\Delta E/E$<br>[%] | $G$<br>[cm <sup>2</sup> sr] | $\epsilon$ |
|-----------|--------------|--------------------------------------|---------------------|-----------------------------|------------|
| 0         | 64           | 5 (61,67)                            | 8                   | 0.00236                     | 1.0        |
| 1         | 75           | 5 (72,77)                            | 7                   | 0.00236                     | 1.0        |
| 2         | 88           | 11 (83,94)                           | 12                  | 0.00236                     | 1.0        |
| 3         | 105          | 11 (99,110)                          | 10                  | 0.00236                     | 1.0        |
| 4         | 121          | 11 (115,126)                         | 9                   | 0.00236                     | 1.0        |
| 5         | 140          | 16 (132,148)                         | 12                  | 0.00236                     | 1.0        |
| 6         | 164          | 22 (153,175)                         | 13                  | 0.00236                     | 1.0        |
| 7         | 191          | 22 (180,202)                         | 11                  | 0.00236                     | 1.0        |
| 8         | 224          | 33 (208,240)                         | 15                  | 0.00236                     | 1.0        |
| 9         | 256          | 22 (246,267)                         | 8                   | 0.00236                     | 1.0        |
| 10        | 294          | 43 (273,316)                         | 15                  | 0.00236                     | 1.0        |
| 11        | 346          | 49 (322,370)                         | 14                  | 0.00236                     | 1.0        |
| 12        | 403          | 54 (376,430)                         | 13                  | 0.00236                     | 1.0        |
| 13        | 468          | 65 (435,501)                         | 14                  | 0.00236                     | 1.0        |
| 14        | 544          | 76 (506,582)                         | 14                  | 0.00236                     | 1.0        |
| 15        | 631          | 87 (587,674)                         | 14                  | 0.00236                     | 1.0        |
| 16        | 734          | 108 (680,788)                        | 15                  | 0.00236                     | 1.0        |
| 17        | 853          | 119 (794,913)                        | 14                  | 0.00236                     | 1.0        |
| 18        | 994          | 152 (918,1070)                       | 15                  | 0.00236                     | 1.0        |
| 19        | 1154         | 157 (1076,1233)                      | 14                  | 0.00236                     | 1.0        |
| 20        | 1295         | 114 (1238,1352)                      | 9                   | 0.00236                     | 1.0        |

Table 2: Energy/Flux Calibration Factors for the Proton Channels on Probe A. Valid from 23 Dec 2012 00:00:00 to 31 Mar 2013 00:00:00. Main rate LUTID: 29953.

| Chan # | $E$ [keV] | $\Delta E (E_{lo}, E_{hi})$ [keV] | $\Delta E/E$ [%] | $G$ [cm <sup>2</sup> sr] | $\epsilon$ |
|--------|-----------|-----------------------------------|------------------|--------------------------|------------|
| 0      | 64        | 5 (61,67)                         | 8                | 0.00236                  | 1.0        |
| 1      | 75        | 5 (72,77)                         | 7                | 0.00236                  | 1.0        |
| 2      | 88        | 11 (83,94)                        | 12               | 0.00236                  | 1.0        |
| 3      | 105       | 11 (99,110)                       | 10               | 0.00236                  | 1.0        |
| 4      | 121       | 11 (115,126)                      | 9                | 0.00236                  | 1.0        |
| 5      | 140       | 16 (132,148)                      | 12               | 0.00236                  | 1.0        |
| 6      | 164       | 22 (153,175)                      | 13               | 0.00236                  | 1.0        |
| 7      | 191       | 22 (180,202)                      | 11               | 0.00236                  | 1.0        |
| 8      | 224       | 33 (208,240)                      | 15               | 0.00236                  | 1.0        |
| 9      | 256       | 22 (246,267)                      | 8                | 0.00236                  | 1.0        |
| 10     | 294       | 43 (273,316)                      | 15               | 0.00236                  | 1.0        |
| 11     | 346       | 49 (322,370)                      | 14               | 0.00236                  | 1.0        |
| 12     | 403       | 54 (376,430)                      | 13               | 0.00236                  | 1.0        |
| 13     | 468       | 65 (435,501)                      | 14               | 0.00236                  | 1.0        |
| 14     | 544       | 76 (506,582)                      | 14               | 0.00236                  | 1.0        |
| 15     | 631       | 87 (587,674)                      | 14               | 0.00236                  | 1.0        |
| 16     | 734       | 108 (680,788)                     | 15               | 0.00236                  | 1.0        |
| 17     | 853       | 119 (794,913)                     | 14               | 0.00236                  | 1.0        |
| 18     | 994       | 152 (918,1070)                    | 15               | 0.00236                  | 1.0        |
| 19     | 1154      | 157 (1076,1233)                   | 14               | 0.00236                  | 1.0        |
| 20     | 1295      | 114 (1238,1352)                   | 9                | 0.00236                  | 1.0        |

Table 3: Energy/Flux Calibration Factors for the Proton Channels on Probe A. Valid from 31 Mar 2013 00:00:00 to 14 Oct 2019 14:27:00. Main rate LUTID: 29954.

| Chan # | $E$ [keV] | $\Delta E (E_{lo}, E_{hi})$ [keV] | $\Delta E/E$ [%] | $G$ [cm <sup>2</sup> sr] | $\epsilon$ |
|--------|-----------|-----------------------------------|------------------|--------------------------|------------|
| 0      | 58        | 5 (56,61)                         | 9                | 0.00236                  | 1.0        |
| 1      | 69        | 5 (67,72)                         | 8                | 0.00236                  | 1.0        |
| 2      | 83        | 11 (77,88)                        | 13               | 0.00236                  | 1.0        |
| 3      | 99        | 11 (94,105)                       | 11               | 0.00236                  | 1.0        |
| 4      | 118       | 16 (110,126)                      | 14               | 0.00236                  | 1.0        |
| 5      | 140       | 16 (132,148)                      | 12               | 0.00236                  | 1.0        |
| 6      | 164       | 22 (153,175)                      | 13               | 0.00236                  | 1.0        |
| 7      | 194       | 27 (180,208)                      | 14               | 0.00236                  | 1.0        |
| 8      | 229       | 33 (213,246)                      | 14               | 0.00236                  | 1.0        |
| 9      | 267       | 33 (251,284)                      | 12               | 0.00236                  | 1.0        |
| 10     | 308       | 38 (289,327)                      | 12               | 0.00236                  | 1.0        |
| 11     | 357       | 49 (332,381)                      | 14               | 0.00236                  | 1.0        |
| 12     | 414       | 54 (387,441)                      | 13               | 0.00236                  | 1.0        |
| 13     | 479       | 65 (446,511)                      | 14               | 0.00236                  | 1.0        |
| 14     | 555       | 76 (517,593)                      | 14               | 0.00236                  | 1.0        |
| 15     | 636       | 76 (598,674)                      | 12               | 0.00236                  | 1.0        |
| 16     | 728       | 98 (680,777)                      | 13               | 0.00236                  | 1.0        |
| 17     | 840       | 114 (783,897)                     | 14               | 0.00236                  | 1.0        |
| 18     | 967       | 130 (902,1032)                    | 13               | 0.00236                  | 1.0        |
| 19     | 1111      | 146 (1038,1184)                   | 13               | 0.00236                  | 1.0        |
| 20     | 1271      | 163 (1190,1352)                   | 13               | 0.00236                  | 1.0        |

Table 4: Energy/Flux Calibration Factors for the Proton Channels on Probe B. Valid from 06 Sep 2012 00:00:00 to 29 Sep 2012 00:00:00. Main rate LUTID: 32000. Note that channel 20 should be considered invalid (it has PHA 255 junk bin included).

| Chan<br># | $E$<br>[keV] | $\Delta E (E_{lo}, E_{hi})$<br>[keV] | $\Delta E/E$<br>[%] | $G$<br>[cm <sup>2</sup> sr] | $\epsilon$ |
|-----------|--------------|--------------------------------------|---------------------|-----------------------------|------------|
| 0         | 63           | 5 (60,65)                            | 9                   | 0.00236                     | 1.0        |
| 1         | 74           | 5 (71,76)                            | 7                   | 0.00236                     | 1.0        |
| 2         | 84           | 5 (82,87)                            | 6                   | 0.00236                     | 1.0        |
| 3         | 98           | 11 (93,103)                          | 11                  | 0.00236                     | 1.0        |
| 4         | 114          | 11 (109,120)                         | 9                   | 0.00236                     | 1.0        |
| 5         | 133          | 16 (125,141)                         | 12                  | 0.00236                     | 1.0        |
| 6         | 155          | 16 (147,163)                         | 10                  | 0.00236                     | 1.0        |
| 7         | 179          | 22 (168,190)                         | 12                  | 0.00236                     | 1.0        |
| 8         | 206          | 22 (195,217)                         | 11                  | 0.00236                     | 1.0        |
| 9         | 239          | 33 (223,255)                         | 14                  | 0.00236                     | 1.0        |
| 10        | 277          | 33 (260,293)                         | 12                  | 0.00236                     | 1.0        |
| 11        | 320          | 43 (298,342)                         | 14                  | 0.00236                     | 1.0        |
| 12        | 371          | 49 (347,396)                         | 13                  | 0.00236                     | 1.0        |
| 13        | 431          | 60 (401,461)                         | 14                  | 0.00236                     | 1.0        |
| 14        | 499          | 65 (466,531)                         | 13                  | 0.00236                     | 1.0        |
| 15        | 577          | 81 (537,618)                         | 14                  | 0.00236                     | 1.0        |
| 16        | 669          | 92 (623,715)                         | 14                  | 0.00236                     | 1.0        |
| 17        | 772          | 103 (721,824)                        | 13                  | 0.00236                     | 1.0        |
| 18        | 891          | 125 (829,954)                        | 14                  | 0.00236                     | 1.0        |
| 19        | 1032         | 146 (959,1105)                       | 14                  | 0.00236                     | 1.0        |
| 20        | 1203         | 184 (1111,1295)                      | 15                  | 0.00236                     | 1.0        |

Table 5: Energy/Flux Calibration Factors for the Proton Channels on Probe B. Valid from 29 Sep 2012 00:00:00 to 16 Jul 2019 16:58:00. Main rate LUTID: 32001.

| Chan<br># | $E$<br>[keV] | $\Delta E (E_{lo}, E_{hi})$<br>[keV] | $\Delta E/E$<br>[%] | $G$<br>[cm <sup>2</sup> sr] | $\epsilon$ |
|-----------|--------------|--------------------------------------|---------------------|-----------------------------|------------|
| 0         | 63           | 5 (60,65)                            | 9                   | 0.00236                     | 1.0        |
| 1         | 74           | 5 (71,76)                            | 7                   | 0.00236                     | 1.0        |
| 2         | 84           | 5 (82,87)                            | 6                   | 0.00236                     | 1.0        |
| 3         | 98           | 11 (93,103)                          | 11                  | 0.00236                     | 1.0        |
| 4         | 114          | 11 (109,120)                         | 9                   | 0.00236                     | 1.0        |
| 5         | 133          | 16 (125,141)                         | 12                  | 0.00236                     | 1.0        |
| 6         | 155          | 16 (147,163)                         | 10                  | 0.00236                     | 1.0        |
| 7         | 179          | 22 (168,190)                         | 12                  | 0.00236                     | 1.0        |
| 8         | 206          | 22 (195,217)                         | 11                  | 0.00236                     | 1.0        |
| 9         | 239          | 32 (223,255)                         | 14                  | 0.00236                     | 1.0        |
| 10        | 277          | 32 (260,293)                         | 12                  | 0.00236                     | 1.0        |
| 11        | 320          | 43 (298,342)                         | 14                  | 0.00236                     | 1.0        |
| 12        | 371          | 49 (347,396)                         | 13                  | 0.00236                     | 1.0        |
| 13        | 431          | 60 (401,461)                         | 14                  | 0.00236                     | 1.0        |
| 14        | 499          | 65 (466,531)                         | 13                  | 0.00236                     | 1.0        |
| 15        | 577          | 81 (537,618)                         | 14                  | 0.00236                     | 1.0        |
| 16        | 669          | 92 (623,715)                         | 14                  | 0.00236                     | 1.0        |
| 17        | 772          | 103 (721,824)                        | 13                  | 0.00236                     | 1.0        |
| 18        | 891          | 125 (829,954)                        | 14                  | 0.00236                     | 1.0        |
| 19        | 1032         | 146 (959,1105)                       | 14                  | 0.00236                     | 1.0        |
| 20        | 1206         | 190 (1111,1300)                      | 16                  | 0.00236                     | 1.0        |
